# Supplementary material for: Distinct transcriptional responses elicited by unfolded nuclear or cytoplasmic protein in mammalian cells
Source: eLife. 2015 Aug 28;4:e07687. doi: 10.7554/eLife.07687 (PMC4566031; doi:10.7554/eLife.07687)
Supplement: Supplementary file 1. — List of genes significantly up- or down-regulated by the three stress conditions (false discovery rate [FDR] <0.05). DOI: http://dx.doi.org/10.7554/eLife.07687.017 [file elife07687s001.xlsx]

## Sheet: Summary
List of genes significantly up- or down-regulated by the three stress conditions (FDR < 0.05)
unfolded DD (tab named DD), heat shock (HS), and tunicamycin (Tu).

## Sheet: Gene_DD
# of Genes	DD45min	DD135min	DD405min
UP	0	63	759
DOWN	0	69	909
DD135up	DD135down		DD405up	DD405down
3110048L19Rik	2310061J03Rik		0610031J06Rik	0610010F05Rik
4632434I11Rik	2610008E11Rik		1110008F13Rik	1110007A13Rik
4933426M11Rik	9130024F11Rik		1110014N23Rik	1110020P15Rik
6530418L21Rik	Adamts1		1110018J18Rik	1110032E23Rik
Adm	Adamts5		1300018I05Rik	1110034A24Rik
Aen	Amigo2		1500031L02Rik	1110034B05Rik
Apaf1	Amotl2		1600002H07Rik	1110067D22Rik
Bag3	Ankrd1		1700021K19Rik	1190002H23Rik
Carhsp1	Arrdc3		1810043G02Rik	1190007I07Rik
Ccdc117	Bcl6		2010011I20Rik	1200009F10Rik
Ccl2	Bdnf		2210016L21Rik	1600012F09Rik
Cdkn1a	Bhlhe40		2410001C21Rik	1600012H06Rik
Cx3cr1	Cdc42ep3		2410131K14Rik	1700024P16Rik
Dennd2c	Cebpd		2810046L04Rik	1700029F09Rik
Dnajb1	Cited2		2810428I15Rik	1810022K09Rik
Eda2r	Ctgf		2900092E17Rik	2010012O05Rik
Fas	Cxcl5		3110002H16Rik	2010107E04Rik
Fat1	Cyp1b1		3230401D17Rik	2010204K13Rik
Gadd45a	D4Bwg0951e		4930572J05Rik	2300009A05Rik
Gclc	Dnm3os		4933407C03Rik	2310002J21Rik
Gclm	Dusp10		4933426M11Rik	2310003F16Rik
Gm4759	Egr1		5031439G07Rik	2310009B15Rik
Grk4	Errfi1		5330431N19Rik	2310022B05Rik
Gsr	Fam164a		6530418L21Rik	2410003K15Rik
Gtse1	Fam46b		9030617O03Rik	2610021K21Rik
Hmox1	Fgf10		9130011E15Rik	2610036L11Rik
Hspa1b	Fhdc1		9230105E10Rik	2610305D13Rik
Hspa8	Filip1l		9530068E07Rik	2700007P21Rik
Hsph1	Foxf2		9930013L23Rik	2700029M09Rik
Ier3	Foxg1		Aak1	2700089E24Rik
Itih5l	Fzd2		Aamp	2810021B07Rik
Kcnq1ot1	Gas1		Aars	2810474O19Rik
Lpin1	H1f0		Aars2	2900010J23Rik
Mdm2	Hes1		Abca2	3110003A17Rik
Mettl6	Hoxa2		Abca7	3110039M20Rik
Mreg	Hoxa3		Abcb6	3200002M19Rik
Msl3l2	Hoxa4		Abcc1	3830406C13Rik
Mybl1	Hoxa5		Abcf3	4932412H11Rik
Olfr614	Id2		Abhd12	5033414D02Rik
Osgin1	Id3		Abhd4	5730408K05Rik
Polk	Kcna4		Abr	5730508B09Rik
Ptpn14	Klf10		Acadvl	9130401M01Rik
Rab40c	Klf3		Aco2	A130010J15Rik
Rdh1	Klf6		Acot7	A430107O13Rik
Rnf169	Krcc1		Acot8	A630047E20Rik
Sesn2	Myc		Acox1	Aasdhppt
Slc19a2	Nab2		Actr1a	Abcd2
Slc7a11	Narf		Adamts7	Abce1
Taf7	Nr2f1		Adar	Abcg2
Tcfcp2l1	Nr2f2		Adi1	Acer3
Tet1	Nr4a1		Aff1	Acsl4
Tnfrsf10b	Osr1		Ahsa1	Acyp1
Trp53inp1	Pcdh18		AI846148	Adam22
Ttc38	Pdgfrb		Aip	Adamts1
Ubc	Ppargc1a		Ak1	Adamts5
Ube2o	Ptx3		Akap8l	Adnp
V1rd4	Rhob		Akt1s1	Adpgk
Wdr92	Serpine1		Aldh2	Agbl3
Zfand2a	Sertad4		Aldh7a1	AI662270
Zfp277	Sgk1		Aldoa	Ak3
Zfp353	Skil		Als2	Ak3l1
Zfp488	Smad6		Ampd3	Ak5
Zmat3	Smad7		Anks3	Akr1b3
	Snai2		Aox1	Akr1c14
	Socs5		Ap2a1	Akt3
	Spry2		Ap2b1	Aldh1a7
	Trim8		Ap3s2	Als2cr4
	Vgll3		Ap4m1	Amigo2
	Zfp503		Apba3	Amotl2
			Aph1a	Angpt1
			Arhgap21	Ank
			Arhgdib	Ankrd1
			Arhgef7	Ankrd37
			Arnt2	Anp32a
			Arrdc1	Anp32b
			Asb6	Anxa1
			Ascc2	Anxa3
			Asl	Ap2a2
			Atf6b	Ap3s1
			Atg2a	Apbb1ip
			Atg2b	Apln
			Atmin	Apoo
			Atp6v0a2	Arglu1
			Atp6v0c	Arhgap29
			Atp6v1a	Arhgef9
			Atp6v1h	Arl6ip6
			AU040829	Asap1
			AW555464	Asb4
			AY074887	Aspn
			B230120H23Rik	Atg3
			B230312A22Rik	Atp11b
			Bag3	Atp11c
			Bahd1	Atp2a1
			Bak1	Atp2b1
			Bat2l	Atp2c1
			Bat4	Atp5f1
			Baz2a	Azin1
			BC005537	B230219D22Rik
			BC006779	B3galnt1
			BC021381	B3gnt5
			BC028528	B630019K06Rik
			BC031781	Bambi
			BC046331	Basp1
			Bcap31	Baz2b
			Blvrb	BC002199
			Bod1	BC003885
			Bpgm	BC021785
			Brd2	BC024659
			Bsdc1	BC031441
			Bud31	Bcap29
			C230096C10Rik	Bcl10
			C330023M02Rik	Bcl2
			C430004E15Rik	Bdnf
			Cachd1	Bmi1
			Calr	Bmp2k
			Carhsp1	Bmper
			Cat	Bnc1
			Cbr3	Bnip3
			Ccdc117	Bola3
			Ccdc22	Bphl
			Cchcr1	Brca2
			Ccnf	Brd7
			Cd151	Brp44
			Cd81	Brp44l
			Cdan1	Btbd1
			Cdc34	Btf3l4
			Cdkn1a	Bxdc1
			Cep120	Bxdc2
			Cep164	C130038G02Rik
			Cherp	C1d
			Chpf2	C1galt1
			Clip2	C1qbp
			Clip3	C1r
			Clptm1	C630043F03Rik
			Cltb	C78339
			Cnnm3	Cacna1a
			Coasy	Calcrl
			Commd9	Camk2d
			Copa	Capza2
			Copg	Car13
			Coq6	Casd1
			Cox7a2l	Casp12
			Cpsf1	Cav1
			Crat	Cav2
			Creg1	Cbx3
			Creld2	Ccar1
			Crtc2	Ccbe1
			Cry2	Ccdc112
			Cryab	Ccdc122
			Csrnp2	Ccdc53
			Ctnnbl1	Ccdc59
			Ctsa	Ccdc72
			Ctsd	Cck
			D10Wsu52e	Ccl9
			D16H22S680E	Ccnh
			D17Wsu92e	Ccni
			D2Ertd391e	Ccnyl1
			D6Wsu116e	Cct4
			D8Ertd738e	Cd163
			D8Ertd82e	Cd24a
			Dad1	Cd2ap
			Dalrd3	Cd93
			Dcaf12	Cdc42ep3
			Dcaf4	Cdc73
			Dcaf7	Cdca4
			Dctn2	Cdh11
			Dctn3	Cdk8
			Dctn4	Cdkl3
			Ddb1	Cdr2
			Ddx41	Cebpb
			Ddx47	Cebpd
			Def8	Cebpg
			Dgat1	Cenpk
			Dhx16	Cenpq
			Dhx32	Cenpv
			Dhx38	Cep63
			Dhx57	Cep78
			Dhx8	Cetn3
			Diablo	Cflar
			Dixdc1	Chac1
			Dlg5	Chchd1
			Dnajb12	Chmp2a
			Dnajb2	Cisd1
			Dnajc11	Cisd2
			Dnajc18	Cited2
			Dnm2	Clns1a
			Dpf2	Cmpk1
			Dpp3	Cnih4
			Drap1	Cnn3
			Drg2	Cno
			Dym	Cntln
			Dync1h1	Col11a1
			Dync1li1	Col3a1
			Dynll2	Col8a1
			Dysf	Comt1
			Eaf1	Cops3
			Ecm1	Coq10b
			Eda2r	Coq2
			Eef2	Cox16
			Efemp2	Cox17
			Ehd3	Cox7b
			Ei24	Cp
			Eif2b4	Crk
			Eif2c3	Csgalnact2
			Eif3h	Csnk1a1
			Eif3l	Csnk1g3
			Elmo2	Ctgf
			Emilin1	Cthrc1
			Ephx1	Ctla2a
			Ercc2	Ctla2b
			Ero1lb	Cugbp1
			Esco2	Cugbp2
			Etl4	Cxcl12
			Etv3	Cxcl5
			Exoc1	Cxcr7
			Exoc4	Cycs
			Ezh1	Cyp1b1
			Fam102a	Cyp39a1
			Fam115a	Cyp51
			Fam115c	Cyth3
			Fam125a	Cytip
			Fam134a	D030056L22Rik
			Fam134c	D16Ertd472e
			Fam13a	Dars
			Fam18a	Dbc1
			Fam3a	Dclre1a
			Fam63a	Dcn
			Fam65a	Dctd
			Fam69b	Dcun1d5
			Fau	Ddah1
			Fbxl19	Ddx18
			Fbxo21	Ddx21
			Fbxo34	Ddx3x
			Fgfrl1	Ddx5
			Fig4	Defb41
			Fkbp14	Dek
			Fkbp4	Denr
			Flnb	Dimt1
			Flywch1	Dkc1
			Fn3krp	Dkk3
			Foxo3	Dlk2
			Frmd8	Dnajc19
			Fryl	Dnajc21
			Ftl1	Dnajc24
			Fto	Dnttip2
			Fxr2	Dock11
			Fyb	Dscc1
			G6pdx	Dtymk
			Gaa	Dus4l
			Gab2	Dusp12
			Gabarapl1	Dut
			Gabarapl2	Dync2li1
			Gadd45a	Dynll1
			Gata4	Ebag9
			Gbf1	Ebf3
			Gcc1	Ebna1bp2
			Gclc	Edn1
			Gclm	Eea1
			Gga2	Eef1e1
			Git1	Efemp1
			Gk5	Efha2
			Gltscr2	Efna5
			Gna11	EG434371
			Gnpda1	Egfr
			Golph3l	Egr2
			Gpatch1	Eif1a
			Gpi1	Eif2s2
			Gpt	Eif3m
			Gpx4	Eif4a2
			Grina	Eif5b
			Grit	Elovl6
			Gsk3a	Eml1
			Gsn	Eml4
			Gsr	Emp1
			Gsta4	Emx2
			Gstm1	Enoph1
			Gstm5	Eny2
			Gstp1	Epb4.1l2
			Gtf3c1	Eps8
			Gtf3c4	Erap1
			Gtse1	Ereg
			Gyk	Esco1
			H2-gs10	Esf1
			H2-Ke2	Esyt2
			Hadh	Etaa1
			Hdac6	Etf1
			Hdgfrp2	Exoc5
			Heatr7a	Exosc6
			Helz	Ext1
			Herc2	F2r
			Hes6	Fabp4
			Hgs	Fahd1
			Hif1an	Fam102b
			Hist1h1c	Fam103a1
			Hist1h1e	Fam107b
			Hist1h2ak	Fam126a
			Hist1h2bc	Fam132b
			Hist1h2bg	Fam162a
			Hist1h3f	Fam164a
			Hist1h4i	Fam188a
			Hist3h2a	Fam49b
			Hk1	Fam53a
			Hmg20b	Fam57a
			Hmox1	Fam5c
			Hnrnpa1	Fam60a
			Homer3	Fam76b
			Hpcal1	Fancb
			Hsdl1	Fancf
			Hsf1	Far1
			Hsf2	Farp1
			Hsp90ab1	Fbxo4
			Hspa13	Fchsd2
			Hspa2	Fermt2
			Hspa8	Fert2
			Hspb8	Fez2
			Hspbp1	Fgf10
			Hsph1	Fgf7
			Huwe1	Fgfr1op2
			Hyal2	Fhdc1
			Hyou1	Fhl1
			Ict1	Fhl2
			Ide	Fibin
			Ier3	Filip1l
			Ifi30	Fkbp3
			Igf2r	Flrt2
			Igfbp6	Fmnl2
			Ighmbp2	Foxc2
			Ints1	Foxf2
			Ints4	Foxg1
			Ints9	Foxn2
			Ip6k2	Foxp1
			Iqgap3	Fst
			Irgq	Fyn
			Itm2c	Fzd1
			Jhdm1d	G3bp1
			Jmjd4	Gabpb1
			Katnb1	Gabpb2
			Kdm2a	Galnt13
			Kdm4a	Gas1
			Keap1	Gas2
			Kif18b	Gatad1
			Kif3c	Gbas
			Kifc1	Ghr
			Klhl21	Gjb4
			Ksr1	Gls
			Lars2	Gm11818
			Layn	Gm13154
			Lepre1	Gm13889
			Lgals3bp	Gm15427
			Lgals8	Gm2382
			Limk1	Gm4987
			Lin37	Gm5934
			Lipa	Gm7027
			Lmtk2	Gng10
			Lnp	Gng5
			Lrp8	Gnl3
			Lrrc49	Gnpnat1
			Lrrc59	Gorab
			Lztr1	Gpr149
			M6pr	Gramd4
			Mad2l1bp	Grem1
			Mafg	Grem2
			Man2a2	Grik2
			Map2k2	Grinl1a
			Map3k4	Grsf1
			Mapk11	Gt(ROSA)26Sor
			Mapk8ip1	Gtf2a2
			Mapk8ip3	Gtf3a
			Mapk9	Gtf3c6
			Mapkbp1	Gtpbp4
			Mapre3	Gtpbp8
			Mdm2	Guf1
			Me1	H2afz
			Med15	H3f3a
			Med24	H3f3b
			Mepce	H47
			Mettl7a1	Has2
			Mfge8	Hdac2
			Mfsd6	Hdac9
			Mgat5	Hdgfrp3
			Mgmt	Heg1
			Mgst3	Hells
			Mib2	Hes1
			Mink1	Hgf
			Mlec	Hiat1
			Mlkl	Hif1a
			Mll1	Hipk2
			Mllt11	Hivep3
			Mlx	Hmga2
			Mmd	Hmgb1
			Mmp9	Hmgb2
			Mms19	Hmgn3
			Mocos	Hnrnpa0
			Mocs1	Hnrnpa2b1
			Mr1	Hnrnpk
			Mreg	Hnrnpr
			Mrpl28	Hnrpll
			Mrpl4	Homer1
			Mrps18a	Hoxa5
			Msn	Hoxd8
			Mtap1a	Hs6st2
			Mtap7d1	Hsd17b7
			Mthfr	Htatsf1
			Mtmr14	Iars2
			Mtx1	Id2
			Mvp	Id3
			Mybl1	Id4
			Myd116	Idi1
			Myst2	Ifi204
			Nacc2	Ifrd1
			Napa	Igf1
			Napb	Igfbp7
			Narfl	Il1r1
			Nav2	Il1rl1
			Nbas	Insig2
			Nbr1	Irx2
			Ndor1	Isg20
			Ndrg4	Isg20l2
			Neat1	Isy1
			Neurl4	Itgav
			Nfkb2	Itgb3bp
			Nfkbib	Itgbl1
			Nfkbil2	Ivns1abp
			Ngf	Kcna4
			Nid1	Kcnab1
			Nmt1	Kctd14
			Nomo1	Kctd15
			Npc1	Klf2
			Nploc4	Klf4
			Nqo1	Klhl23
			Nucb1	Klhl5
			Numbl	Kras
			Nup214	Krcc1
			Oaf	Kti12
			Ogfod2	l7Rn6
			Ormdl2	Lactb
			Osbpl7	Lactb2
			Osgin1	Larp2
			Pafah2	Larp7
			Pak4	Las1l
			Parp4	Lcmt2
			Pcbp2	Ldha
			Pcnxl3	Leprot
			Pdcd6ip	Lfng
			Pdhb	Lhfp
			Pdhx	Lhx9
			Pdlim7	Lipg
			Pdrg1	Lmo4
			Peg3	Loh12cr1
			Pelo	Lonp2
			Pfkm	Lox
			Pgd	Loxl2
			Phc3	Lpar6
			Phf1	Lphn2
			Phf16	Lrch2
			Phf8	Lrrn4cl
			Phlda3	Lsm1
			Pi4kb	Lsm6
			Pir	Lsm8
			Pisd-ps2	Lum
			Pitpnm1	Lxn
			Pkd1	Lyar
			Pkm2	Lyrm2
			Plbd2	Lyrm4
			Plcg1	Magi3
			Pld2	Mak16
			Plekhm1	Marcks
			Plk3	Mat2a
			Plrg1	Mbd2
			Plxnb2	Mbnl1
			Plxnd1	Mbnl2
			Pml	Mbtps2
			Pmm1	Mcfd2
			Pnpla6	Mecom
			Pold2	Meis2
			Polr2a	Memo1
			Polr3a	Mettl5
			Pom121	Mettl9
			Ppard	Mex3d
			Ppm1f	Mgat2
			Ppp1r10	Mgp
			Ppp1r16a	Mier1
			Ppp2r5d	Mios
			Pqlc2	Mllt3
			Praf2	Mmachc
			Prcc	Mnat1
			Prdm2	Mnd1
			Prdx1	Morc3
			Prdx2	Mospd1
			Prdx6	Mphosph10
			Prepl	Mpp6
			Prkab2	Mrp63
			Prl2c3	Mrpl18
			Procr	Mrpl33
			Prpf19	Mrpl52
			Prpf8	Msi2
			Prr13	Msrb3
			Prrg4	Mtap
			Psap	Mtcp1
			Psd	Mtdh
			Psen1	Mtus1
			Psma7	Mtx2
			Psmb2	Mum1l1
			Psmb3	Murc
			Psmb4	Mxra7
			Psmb5	Myc
			Psmb6	Mylip
			Psmc2	Nab1
			Psmc3	Nab2
			Psmc4	Naf1
			Psmc5	Nampt
			Psmd11	Nasp
			Psmd13	Nbn
			Psmd2	Ncam1
			Psmd3	Ncl
			Psmd4	Ndufa6
			Psmd8	Ndufaf4
			Psmd9	Ndufb2
			Psme4	Ndufb4
			Ptcd1	Ndufc1
			Ptges	Ndufc2
			Ptgr1	Ndufs1
			Ptgs2	Nek6
			Ptk2	Nek7
			Ptpn14	Nexn
			Ptpn23	Nfia
			Ptprn	Nfib
			Pycrl	Nfu1
			Qars	Nip7
			Qsox1	Nmt2
			Rab11fip5	Nol8
			Rab40c	Nop58
			Rab43	Nov
			Rabgef1	Npat
			Rabl5	Npm3
			Rad54l2	Npr3
			Ranbp10	Nqo2
			Rangap1	Nr2f1
			Raver1	Nr2f2
			Rbl2	Nr4a1
			Rbm14	Nr4a2
			Rbm42	Nrn1
			Rcan1	Nrp1
			Recql5	Nsbp1
			Rela	Nsmce4a
			Repin1	Nt5c3
			Rexo1	Nucb2
			Rfx1	Nucks1
			Rgs12	Nudcd2
			Rhbdf2	Nudt19
			Rhod	Nudt4
			Riok3	Nudt9
			Rit1	Nufip1
			Rnf135	Nup37
			Rnf169	Nvl
			Rnf181	Nxt1
			Rnf24	Oaz1
			Rnf40	Ogfrl1
			Rnu1b2	Ogn
			Rom1	Orc6l
			Rplp0	Osbpl3
			Rplp2	Osmr
			Rps3	Osr1
			Rptor	Ostc
			Rusc1	Ovca2
			Rusc2	Oxct1
			Samd4b	P2rx3
			Sap130	P4ha1
			Sap30l	P4ha3
			Saps1	Pa2g4
			Scamp2	Paip2
			Sec16a	Palm2
			Sec23b	Papd4
			Sec24d	Parp2
			Sema4b	Pcdh18
			Sepsecs	Pcdh19
			Serpinb6a	Pcgf5
			Sesn2	Pcgf6
			Setd1a	Pcna
			Sf1	Pcnp
			Sfxn5	Pdap1
			Sgsm3	Pdcd10
			Sgtb	Pdcd5
			Sh2b1	Pde4b
			Sin3b	Pdgfrb
			Skap2	Pdk1
			Slc11a2	Pds5a
			Slc12a7	Pds5b
			Slc24a6	Peg12
			Slc25a33	Per2
			Slc25a37	Pex7
			Slc25a38	Pfdn1
			Slc25a44	Pfdn4
			Slc2a10	Pgam5
			Slc35b1	Phf6
			Slc48a1	Phldb2
			Slc6a8	Pigp
			Slc7a11	Pigw
			Slc9a1	Pigy
			Smg5	Pik3r1
			Smpd4	Pkia
			Snapc2	Pla2g4a
			Snf8	Plau
			Snrnp25	Plcb4
			Snx10	Plekha4
			Sord	Plekhh2
			Speg	Plscr2
			Spire2	Pnn
			Spna2	Pno1
			Spns1	Pogk
			Spr	Pole4
			Sqrdl	Polr2k
			Sqstm1	Polr3g
			Srbd1	Postn
			Srp68	Ppat
			Srrm2	Ppfibp1
			Srxn1	Ppil4
			Ssx2ip	Ppil5
			St13	Ppp1r14b
			Stk10	Ppp1r3d
			Stom	Ppp2r2a
			Sulf2	Ppp2r5a
			Sumf2	Ppp3cc
			Supt5h	Ppp3r1
			Supt6h	Ppp4r2
			Surf4	Prelp
			Sympk	Prim1
			Syne2	Prkca
			Syvn1	Prkg2
			Taf7	Prkrir
			Taldo1	Prokr1
			Taok3	Prrx1
			Tap1	Prss23
			Tapbp	Psip1
			Tax1bp1	Pstk
			Tbc1d17	Ptbp2
			Tbc1d22a	Ptger4
			Tcirg1	Ptgfr
			Tctn2	Ptp4a1
			Tctn3	Ptpmt1
			Tecr	Ptpn2
			Tfip11	Pttg1
			Thrb	Ptx3
			Tiam1	Pxmp3
			Ticam1	Qk
			Tkt	Rab11a
			Tle6	Rab3c
			Tmc6	Rabggtb
			Tmcc2	Rac1
			Tmem144	Rad50
			Tmem184b	Rai14
			Tmem19	Rap1a
			Tmem214	Rap1b
			Tmem55b	Rap1gds1
			Tmem63b	Rarb
			Tmem67	Rars2
			Tnfrsf10b	Rasa1
			Tnks	Rasa2
			Tnpo2	Rasl2-9
			Tomm40l	Rassf2
			Tor1b	Rassf6
			Tox4	Rbm39
			Tpra1	Rbm45
			Traf3	Rbmxrt
			Trafd1	Rbpj
			Trim26	Rcan2
			Trim41	Rdh14
			Trim62	Rdx
			Trmt1	Rer1
			Trp53	Rg9mtd1
			Trp53inp1	Rgs19
			Trrap	Rhobtb3
			Tsc2	Rmi1
			Ttbk2	Rnaseh1
			Ttc23	Rnaseh2b
			Ttc26	Rnd3
			Ttll3	Rnf138
			Ttll7	Rnf144a
			Tuba4a	Rnf2
			Tubb2a	Rnf217
			Tubb2c	Rnft1
			Tubg1	Rpa3
			Tufm	Rpgr
			Tyk2	Rpl34
			Tyro3	Rpl35a
			Ubb	Rpl36al
			Ubc	Rpl39
			Ube2o	Rps13
			Ube4a	Rps26
			Ube4b	Rps6ka6
			Ubfd1	Rragc
			Ubqln1	Rras2
			Ubr2	Rrp15
			Ubr3	Rshl2a
			Ubr4	Rsl1d1
			Ubxn1	Rsrc1
			Ubxn4	Rtcd1
			Uhmk1	S1pr3
			Uhrf1bp1l	Samd4
			Ulk1	Sav1
			Unc45a	Scaper
			Unc5b	Scg5
			Upf1	Schip1
			Urm1	Sclt1
			Usp14	Scoc
			Usp19	Sdc2
			Usp20	Sdpr
			Usp27x	Sec61b
			Usp3	Sec61g
			Usp5	Seh1l
			Vat1	Sema3a
			Vcp	Senp6
			Vezt	2014-09-15
			Vps11	2014-09-10
			Vps18	2014-09-07
			Vps37b	Serbp1
			Wbp2	Serp1
			Wdr1	Serpina4-ps1
			Wdr18	Serpine1
			Wdr45	Sertad4
			Wdr62	Sestd1
			Wdr8	Set
			Wdr81	Setbp1
			Wdr91	Sfrp2
			Wfs1	Sfrs7
			Whamm	Sfxn1
			Wipi2	Sgcb
			Wrap53	Sgk1
			Xab2	Sgms1
			Xrcc3	Sgpp1
			Ypel5	Sh3bgrl
			Ywhag	Sh3kbp1
			Zbtb17	Sh3rf3
			Zbtb45	Siglecg
			Zbtb7b	Sigmar1
			Zc3h3	Skil
			Zc3hc1	Slbp
			Zcchc4	Slc1a3
			Zdhhc18	Slc25a24
			Zfand2a	Slc25a3
			Zfp142	Slc25a4
			Zfp180	Slc25a5
			Zfp28	Slc35a1
			Zfp445	Slc38a4
			Zfp513	Slc41a2
			Zfp516	Slc4a4
			Zfp59	Slc4a7
			Zfp64	Smad6
			Zfp790	Smad9
			Zfp871	Smap1
			Zfyve26	Smc4
			Zkscan17	Smc6
			Zkscan5	Smek1
			Zmat3	Smpd3
			Zmiz2	Sms
			Zrsr1	Snai1
			Zswim1	Snai2
			Zswim4	Snhg1
			Zwint	Snhg3
				Snhg6
				Snhg9
				Snn
				Snrpa1
				Snrpb2
				Snrpd1
				Snrpe
				Snrpg
				Snx14
				Snx24
				Snx25
				Snx3
				Spcs3
				Spin1
				Spire1
				Spp1
				Spry1
				Ssbp2
				Ssr3
				Ssu72
				Stag2
				Steap2
				Stim2
				Stk39
				Strn3
				Styk1
				Styx
				Sub1
				Suclg2
				Sulf1
				Sumo2
				Suz12
				Tada2l
				Taf9b
				Tbl1xr1
				Tbx15
				Tcf4
				Tdrkh
				Terf1
				Tfam
				Tfrc
				Tgfbr1
				Thap2
				Thbd
				Thbs1
				Thbs2
				Thoc1
				Thoc7
				Tigd2
				Timm8a1
				Timm8b
				Timm9
				Timp3
				Tipin
				Tmco1
				Tmed5
				Tmed7
				Tmeff1
				Tmem126a
				Tmem165
				Tmem179b
				Tmem200a
				Tmem47
				Tmem49
				Tmem50b
				Tmem60
				Tmem9b
				Tmf1
				Tmpo
				Tmtc4
				Tnfaip6
				Tnik
				Top1
				Top2b
				Topbp1
				Tpk1
				Tpm1
				Tpm4
				Tpst2
				Trappc6b
				Trib2
				Trmt11
				Trnau1ap
				Trove2
				Tsn
				Tspyl4
				Ttc32
				Tuba1b
				Tubgcp2
				Tug1
				Tusc1
				Tusc3
				Twist1
				Twist2
				Txndc17
				Txnrd3
				Uaca
				Uba2
				Uba52
				Ube2b
				Ube2d2
				Ube2d3
				Ube2h
				Ube2n
				Ubtd2
				Ubxn2b
				Uchl3
				Uchl5
				Ugdh
				Usmg5
				Usp1
				Vcam1
				Vcan
				Vcl
				Vdr
				Vgll3
				Vim
				Vkorc1
				Vkorc1l1
				Vps54
				Wbp5
				Wdr43
				Wdr61
				Wdr89
				Wnt5a
				Wwp1
				Xiap
				Xrcc6bp1
				Yrdc
				Ywhaq
				Yy2
				Zbtb2
				Zbtb8os
				Zc3h14
				Zc3h8
				Zfc3h1
				Zfhx4
				Zfp238
				Zfp280c
				Zfp318
				Zfp36l2
				Zfp467
				Zfp518
				Zfp62
				Zfp706
				Zfp800
				Zfp825
				Zfr
				Zhx1
				Znhit6

## Sheet: Gene_HS
# of Genes	HS45min	HS135min
UP	186	791
DOWN	26	579
HS45up	HS45down		HS135up	HS135down
1110012J17Rik	1700022C21Rik		1110012J17Rik	0610007P08Rik
2410025L10Rik	Aldh1a1		1190005F20Rik	1110008F13Rik
2700081O15Rik	Alg12		1700021K19Rik	1110020P15Rik
4933428G20Rik	Arl6ip1		1810031K17Rik	1110059E24Rik
6030419C18Rik	Aspn		2200002D01Rik	1200014M14Rik
9130024F11Rik	B3gnt5		2310014H01Rik	1500011H22Rik
A430110N23Rik	Bbs12		2310022A10Rik	1700029F09Rik
Agap2	Ccnb1		2310079F23Rik	1810022K09Rik
Ahdc1	Clca1		2410004B18Rik	1810064F22Rik
Amotl2	Cxcl5		2510012J08Rik	2010012O05Rik
Apex1	Eif3e		2610110G12Rik	2010107E04Rik
Apob48r	Eif4a2		2900092E17Rik	2210408I21Rik
Arhgap17	Enpp2		4922501C03Rik	2210411K11Rik
Atf4	Has2		4930539E08Rik	2310004I24Rik
Atn1	Kif20a		4930546H06Rik	2410003K15Rik
Atoh8	Parl		4930572J05Rik	2410127L17Rik
Atxn1	Phf5a		4931406H21Rik	2410129H14Rik
Avpi1	Polr3k		4931406P16Rik	2610002M06Rik
Bag3	Prokr1		4933426M11Rik	2610014I16Rik
Basp1	Psma3		5330426P16Rik	2610209A20Rik
Bat2	Sfrs5		5730559C18Rik	2700099C18Rik
Bcl7c	Sgk1		6030419C18Rik	2810021G02Rik
Bcl9l	Snhg9		6330408A02Rik	4930547N16Rik
Begain	Snrpg		6330416G13Rik	5031414D18Rik
Bhlhe40	Taf9		8430406I07Rik	5730455O13Rik
Bhlhe41	Tuba1b		9030025P20Rik	5730470L24Rik
Brd4			9030418K01Rik	6030446N20Rik
C130039O16Rik			9030425E11Rik	6330409N04Rik
C77080			9130024F11Rik	6720457D02Rik
Cblb			9130227C08Rik	6720460F02Rik
Ccnk			9630058J23Rik	6720463M24Rik
Cd248			A130042E20Rik	9130011J15Rik
Cebpb			A430110N23Rik	9430038I01Rik
Cep164			A930001N09Rik	9930021J03Rik
Chac1			Aak1	A130022J15Rik
Ciz1			Abcc5	Abca1
Col11a1			Acbd5	Abhd13
Col16a1			Acd	Actl6a
Col1a1			Acot2	Actr10
Col27a1			Actr5	Actr2
Col28a1			Adam8	Agps
Col3a1			Adamtsl4	Akirin2
Col5a1			Adcy7	Aldh1a1
Creb3l1			Aebp1	Aldh1a7
Crebbp			Aff1	Alg6
Crocc			Agap1	Alg9
D4Wsu53e			Agfg2	Alox8
Ddc8			Ahdc1	Anapc2
Ddit3			Ahr	Anapc4
Ddx50			Ahsa1	Ankrd28
Dhrs3			Ahsa2	Ap1s2
Dlc1			Ak1	Appbp2
Dlgap4			Akap12	Arf2
Dnaja4			Akap13	Arfgap1
Dnajb1			Akap2	Arhgap19
Dnajb2			Akna	Arl6ip1
Dnmt3a			Amotl2	Armc8
Dopey2			Ankrd11	Ash2l
Dusp1			Ankrd57	Aspm
Ephb3			Anks6	Aspn
Fam43a			Anp32a	Asxl1
Fbxl14			Anp32b	Atf7ip2
Fos			Aox1	Atp11b
Foxn3			Apbb2	Atp1b1
Foxp4			Apex1	Atp1b3
Fzd2			Api5	Atp5f1
Gadd45b			Aplf	Atp5j2
Gadd45g			Apob48r	Atp5k
Gata2			Arap1	Atp5l
Gata3			Arhgap17	Atr
Gm8580			Arhgap29	AY074887
Gt(ROSA)26Sor			Arhgef18	B3gnt5
H3f3a			Arid5b	Bambi
Hcfc1r1			Armc7	BB287469
Hdac4			Arvcf	Bbs12
Herpud1			Ascc2	BC023882
Hexim1			Atf4	BC088983
Hic1			Atg16l2	Bcap29
Hlx			Atn1	Bclaf1
Hoxa5			Atoh8	Brd8
Hoxc6			Atp6v0a2	Brwd2
Hoxd8			Atp6v1g1	Btf3l4
Hspa1b			Atxn1	Bub1
Id2			Avpi1	Bzw2
Id3			B4galt5	C1galt1
Id4			Bag2	C330023M02Rik
Ier5l			Bag3	C78339
Igfbp6			Baiap2	Cables2
Irf2bp1			Banp	Calm1
Irx5			Bat2	Cand1
Jund			Bat2l	Casp12
Kctd1			Bat4	Cav2
Klf3			Bbc3	Cbwd1
Klf4			BC005624	Ccdc99
Lats2			BC017643	Ccnb1
Lzts2			BC017647	Ccnb2
Map3k14			BC031781	Ccnc
Marcks			BC032203	Ccne1
Mbd6			BC048403	Ccnf
Med26			Bcar1	Cd24a
Mex3b			Bcas2	Cd300lb
Mn1			Bcl3	Cdc16
Mpv17l2			Bcl6	Cdc20
Mtap1a			Bcl9l	Cdc25c
Mtap7d1			Bdnf	Cdc2a
Mtss1l			Begain	Cdc42ep3
Myh9			Bglap-rs1	Cdca4
Nab2			Bhlhe40	Cdk5rap1
Nfix			Bhlhe41	Cdkn3
Nfkbil1			Bicc1	Cela1
Oaz1			Bnc2	Cenpa
Otud7b			Bpnt1	Cenpi
Per2			Brd1	Cenpt
Per3			Brd3	Cep192
Pex26			Brd4	Cfl2
Phlda1			Bst2	Chrna1
Phldb1			Btbd2	Churc1
Plec1			C030016D13Rik	Cisd2
Plekha4			C130039O16Rik	Ckap2
Ppp1r9b			C1r	Cks1b
Prpf38b			C2cd3	Cks2
Pura			C430004E15Rik	Clca1
Pvrl1			C530028O21Rik	Clspn
Pwwp2b			C77080	Cmc1
Rarg			Cacna1c	Cmtm7
Rbm12b			Calcoco1	Cnbp
Rbm38			Cald1	Cnih4
Repin1			Cblb	Cnot6
Rere			Cbx4	Cnot6l
Rest			Cbx6	Copb1
Rhox8			Cby1	Cops2
Rmrp			Ccdc109b	Cops3
Rrbp1			Ccdc117	Cox11
Runx1t1			Ccdc130	Cox5a
Safb			Ccdc55	Cox7a2
Scand1			Ccdc6	Cse1l
Sertad1			Ccdc92	Ctf1
Sf3a2			Ccl2	Ctgf
Sf3b4			Ccnd3	Cxcl5
Sh3pxd2a			Ccnk	Cxcr7
Shox2			Ccpg1	D2Ertd750e
Ski			Ccrk	D4Bwg0951e
Slc30a1			Cd248	Dcaf13
Smad6			Cdc26	Dck
Smad7			Cdgap	Dcun1d4
Snai1			Cdkn1a	Ddah1
Socs3			Cdkn1b	Ddhd2
Sorbs3			Cebpg	Ddx11
Sox4			Cenpm	Ddx39
Sox9			Cggbp1	Ddx3x
Spen			Cgnl1	Ddx52
Spsb2			Chac1	Defb41
Tcfap2a			Chd3	Dem1
Tcfap4			Chmp2a	Denr
Tchp			Cic	Depdc1a
Tead3			Ciz1	Dhx33
Tef			Clip3	Dhx36
Tenc1			Cln8	Dkk2
Tgfb1i1			Clta	Dnajc27
Tmem119			Cltb	Dpm2
Tnfsf9			Cnih2	Dram1
Tnk2			Cnnm4	Drg1
Tnks1bp1			Col10a1	Dynlt1
Tnrc18			Col11a1	Echs1
Tob2			Col16a1	Efna4
Trerf1			Col1a1	Egln3
Trim8			Col1a2	Egr1
Trip10			Col27a1	Eif2a
Tsc22d3			Col28a1	Eif2ak1
Ube3a			Col3a1	Eif2ak2
Wipf1			Col4a1	Eif2b1
Wipf2			Col4a2	Eif2b3
Zbtb4			Col4a5	Eif2b5
Zfhx3			Col4a6	Eif2s3y
Zfp319			Col5a1	Eif3e
Zfp362			Col5a2	Eif3f
Zfp367			Col5a3	Eif3l
Zfp36l1			Col6a1	Eif4a1
Zfp385a			Col6a2	Eif4e
Zfp467			Col7a1	Eif5a2
Zfp503			Cpeb3	Elp2
Zfp516			Cpeb4	Elp3
Zfp622			Cpox	Emp1
Zfp652			Cpsf6	Emp3
Znfx1			Creb3l1	Ereg
Zscan29			Crebbp	Erh
			Creld2	Esd
			Csda	Etaa1
			Csf2rb2	Exoc5
			Csk	Exod1
			Csrnp2	F730047E07Rik
			Csrp1	Faf1
			Cuedc2	Fam100b
			Cxcl12	Fam103a1
			D4Wsu53e	Fam115a
			D6Wsu116e	Fam115c
			D8Ertd82e	Fam40a
			Daam1	Fam49b
			Dap	Fam55c
			Dcakd	Fam55d
			Ddc8	Fam5c
			Ddit3	Fam69a
			Ddit4	Fam83d
			Ddr1	Fam92a
			Ddrgk1	Fancd2
			Ddx50	Fancf
			Deaf1	Fancl
			Dennd1b	Fbxo30
			Dennd2a	Fdx1
			Diras2	Fgfr1op
			Dlc1	Fh1
			Dlgap2	Foxr1
			Dlgap4	Fusip1
			Dlk1	Fzd6
			Dlx2	G6pdx
			Dnaja1	Galnt11
			Dnaja4	Gcsh
			Dnajb1	Gemin4
			Dnajb2	Ggnbp2
			Dnajc28	Glo1
			Dnmt3a	Gls
			Dopey2	Glul
			Dos	Gm14410
			Dpp7	Gm7036
			Dpysl2	Gm773
			Dst	Gm9199
			Dtx4	Gmfb
			Dub1	Gmnn
			Dusp14	Gnb4
			Dusp18	Gpn1
			Dusp4	Grem2
			Dvl2	Gsg2
			Dynll1	Guf1
			E2f2	Gyk
			Ecm1	H3f3b
			Edn1	Hadhb
			Efnb1	Hbp1
			Efnb2	Hdac3
			Eid3	Heatr3
			Elovl5	Hmga2
			Enah	Hmgb3
			Ep300	Hnrnpa0
			Ephb3	Hprt1
			Epn1	Idh1
			Ets2	Ifi204
			Etv3	Ifitm3
			Etv6	Ifrg15
			Ezr	Ift74
			Fam102a	Igf2bp3
			Fam107b	Ikbkap
			Fam110b	Il1rl1
			Fam110c	Il8rb
			Fam126a	Immp1l
			Fam134b	Imp3
			Fam13c	Impad1
			Fam148c	Ino80c
			Fam154b	Insig2
			Fam164a	Ipo11
			Fam43a	Ivns1abp
			Fam46a	Jagn1
			Fam59a	Kctd9
			Fat4	Kdm1
			Fbrs	Kif11
			Fbxl14	Kif14
			Fbxl22	Kif20a
			Fcgrt	Kif22
			Fgfr2	Kif23
			Fhdc1	Kif2c
			Fibin	L3mbtl2
			Ficd	Lage3
			Fip1l1	Lamc2
			Fjx1	Lass4
			Fkbp2	Lcmt2
			Fkbp4	Ldha
			Flad1	Lepr
			Flnb	Lin28b
			Fn1	Lnx1
			Fos	Loxl2
			Foxj3	Lpar6
			Foxk1	Lpcat1
			Foxn2	Lrrc2
			Foxn3	Lrrc40
			Foxo3	Lsm5
			Foxp1	Map3k7ip3
			Foxp4	Mapk14
			Fst	2014-03-07
			Ftl1	Mastl
			Fubp1	Mat2a
			Fxr2	Mcat
			Fyn	Mcts1
			Fzd2	Med29
			Gaa	Mfsd2
			Gab1	Mios
			Gabrb3	Mobkl1b
			Gadd45a	Mobkl3
			Gadd45b	Mpi
			Gadd45g	Mpv17l
			Galr2	Mrpl33
			Gas7	Mrps14
			Gata3	Mrps24
			Gata4	Mtf2
			Gcc1	Mtmr12
			Gcnt2	Mtpn
			Gdnf	Myef2
			Gigyf1	Nae1
			Gimap1	Naip5
			Glis3	Nap1l1
			Gltp	Nat5
			Gm129	Nav3
			Gm15427	Ncapd3
			Gm3219	Ncstn
			Gm8580	Nde1
			Gng5	Ndfip2
			Gnpda1	Ndufa4
			Golga4	Ndufa9
			Golgb1	Nipal1
			Gps2	Nkrf
			Gpt2	Nmd3
			Grk4	Nol11
			Gse1	Nol9
			Gt(ROSA)26Sor	Nop56
			Gtf2f1	Nsmaf
			Hcfc1r1	Nsmce1
			Hdac4	Nsun2
			Herpud1	Nsun4
			Hexim2	Nt5dc1
			Hgs	Nubp1
			Hipk2	Nudcd1
			Hist2h2be	Nuf2
			Hist3h2a	Nup133
			Hivep1	Nup37
			Hivep2	Nup43
			Hivep3	Nupl2
			Hlf	Ofd1
			Hlx	Ogn
			Hmox1	Orc6l
			Hnrnpa1	Osgepl1
			Hoxa1	Pafah1b1
			Hoxa3	Paip2b
			Hoxc6	Pak2
			Hs1bp3	Parl
			Hs6st1	Pbld
			Hsp90ab1	Pcca
			Hspa1b	Pcgf6
			Hspa4l	Pcyt1b
			Hspa5	Pdcd6
			Hspa8	Pdss1
			Hspb8	Pex11a
			Hspe1	Pfn2
			Hsph1	Pgp
			Hyou1	Phf14
			Id2	Phf5a
			Id3	Plk1
			Ier5l	Pmpca
			Igf1	Pms2
			Igf1r	Pole
			Igf2bp1	Polr1b
			Igfbp6	Polr2k
			Il5ra	Polr3k
			Ino80d	Ppif
			Iqcc	Ppp1r16b
			Irak2	Ppp2ca
			Irf1	Ppp2r1b
			Irf9	Ppp2r2a
			Irs1	Ppp3r1
			Irx1	Ppp6c
			Irx3	Prc1
			Irx5	Prdx1
			Itgb8	Prdx6
			Itpk1	Prkab1
			Itpripl2	Prl2c2
			Jag1	Prmt1
			Jdp2	Prokr1
			Jmjd6	Prps1
			Jmy	Prpsap1
			Junb	Psma3
			Jund	Psmb3
			Kank1	Psmd14
			Katnal1	Psmd5
			Kctd1	Psme4
			Kctd15	Ptcd3
			Kctd18	Ptcra
			Kdm6b	Pter
			Kif13b	Ptgs2
			Kitl	Ptp4a1
			Klf2	Ptrh2
			Klf3	Pttg1
			Klf4	Qrsl1
			Klf5	Rab11a
			L3mbtl3	Rab33b
			Lats2	Rabif
			Lhx9	Racgap1
			Lmtk2	Raf1
			Lnx2	Rap1b
			Lpcat4	Rasa2
			Lrp4	Rassf6
			Lrp6	Rbm12
			Lrrc8a	Rdh14
			Lsm12	Rexo2
			Ltbp4	Rfc5
			Ly6c1	Rft1
			Maged1	Rgs16
			Magi2	Rhoq
			Maml1	Ripply3
			Manf	Rnf145
			Map3k13	Rnf160
			Map3k8	Rnf4
			Mapk8ip1	Rnu1b2
			Mapre3	Rpa3
			Mbd6	Rpl35a
			Mboat7	Rpl39
			Mcc	Rpl9
			Meg3	Rpp30
			Megf10	Rps15a
			Mex3b	Rps27a
			Mfap1b	Rps27l
			Mfhas1	Rps6ka5
			Mib2	Rrm1
			Mknk2	Rttn
			Mllt3	S1pr3
			Mmp9	Sar1b
			Mmrn2	Scamp5
			Mn1	Scand1
			Mns1	Scara3
			Mobkl2b	Scd3
			Morf4l2	Scfd1
			Mrps12	Scml4
			Mt1	Scoc
			Mt2	Sdhd
			Mta1	Sec61g
			Mtap1a	Sephs2
			Mtap1b	2014-09-10
			Mtap7d1	Sepx1
			Mtf1	Serinc1
			Mthfr	Serpine1
			Mtrr	Sfrs5
			Mtss1l	Sfrs6
			Mustn1	Sfxn1
			Mxd1	Sfxn2
			Myc	Sgk1
			Myd116	Shcbp1
			Myh9	Siah1a
			Myo18a	Siah1b
			Nab2	Sin3a
			Nceh1	Skap2
			Nck2	Skp1a
			Ncoa3	Slc10a3
			Ncor2	Slc19a1
			Ndufa6	Slc20a2
			Nedd4l	Slc25a11
			Neu1	Slc25a13
			Nfe2l1	Slc25a16
			Nfix	Slc25a17
			Nfkb2	Slc25a3
			Nfkbib	Slc29a2
			Nfkbil1	Slc2a10
			Nhlrc2	Slc31a1
			Ninl	Slc35a1
			Nkx2-1	Slc39a10
			Nol4	Slc4a7
			Notch2	Slc5a6
			Nr1d1	Slc7a14
			Nucb1	Slc7a3
			Nudc	Slmo2
			Numa1	Smc6
			Numb	Smg5
			Nupr1	Smu1
			Oaz1	Snhg9
			Obfc2b	Snrnp40
			Odz4	Snrpe
			ORF19	Snrpg
			Os9	Spag5
			Osgin1	Spc25
			Otud3	Spopl
			Otud7b	Ssr4
			P2rx5	Stard7
			P4ha1	Stard8
			P4ha2	Stk39
			Pard3	Stxbp2
			Parp3	Styx
			Pawr	Suhw4
			Pcdhgc3	Suz12
			Pdcd6ip	Sypl
			Pde4dip	Taf1b
			Pdia4	Taf5
			Pdzd8	Taf5l
			Peg3	Taf9
			Per2	Tarsl2
			Per3	Tatdn1
			Pex26	Tbcd
			Phf1	Tbl3
			Phf17	Tdg
			Phf2	Tfrc
			Phf3	Th1l
			Phlda1	Thbs1
			Phldb1	Thoc7
			Pigyl	Timp1
			Pik3r1	Tipin
			Pip4k2c	Tm4sf1
			Pja1	Tm9sf2
			Plat	Tmem128
			Plcxd2	Tmem135
			Plec1	Tmem144
			Plekha4	Tmem147
			Plekhg3	Tmem167
			Plekhg5	Tmem171
			Plekho2	Tmem18
			Plod1	Tmem30a
			Pnkd	Tmem5
			Pnma1	Tmem60
			Pofut2	Tmem68
			Poli	Tmem97
			Polm	Tnfaip8l1
			Ppard	Tnfsf10
			Ppargc1a	Tomm20
			Ppargc1b	Tomm70a
			Ppp1r10	Tpcn2
			Ppp1r13l	Tpk1
			Ppp1r15b	Trdmt1
			Ppp1r9b	Trnt1
			Ppp4r2	Trub2
			Ppt2	Ttk
			Pqbp1	Ttll4
			Prdm2	Tuba1b
			Prelp	Tuba4a
			Prickle1	Tubb2c
			Prkab2	Tubgcp5
			Prkcdbp	Tyr
			Prpf38b	Uba3
			Prr12	Ube2j2
			Prrg2	Ube2v2
			Prtg	Ube3c
			Prune2	Ublcp1
			Psd	Unc50
			Ptpn21	Upp1
			Pura	Uqcrb
			Purg	Uqcrfs1
			Pvrl1	Urod
			Pwwp2b	Usmg5
			Pxn	Usp14
			Pygo2	Usp28
			Rab32	Utp18
			Radil	Vamp2
			Ralb	Vav1
			Rarg	Vbp1
			Rassf5	Vdac1
			Rbm12b	Vdac3
			Rbm15b	Vps35
			Rbm38	Vps37a
			Rbm4	Vta1
			Rbm47	Wdhd1
			Rbm8a	Wdr5
			Rce1	Wdr6
			Rcn3	Wdr75
			Reep5	Wdr77
			Refbp2	Wsb1
			Repin1	Xlr
			Rere	Xpo6
			Rest	Xrn2
			Rftn2	Yars2
			Rgl1	Yipf4
			Rhou	Yod1
			Rhox8	Ythdc2
			Rilpl1	Yy1
			Rmrp	Zbtb22
			Rnf150	Zc3h6
			Rnf152	Zdhhc13
			Rnf41	Zfand5
			Rngtt	Zfp36l2
			Robld3	Zfp386
			Rora	Zfp472
			Rph3a	Zfp607
			Rpph1	Zfp771
			Rprd2	Zfp867
			Rrbp1	Zfp870
			Rreb1	Zfp97
			Rshl2b	Zmym4
			Runx1t1	Zmym5
			Rusc2	Znhit3
			S3-12
			Safb
			Samd1
			Sars
			Sash1
			Sbno2
			Scamp3
			Scmh1
			Sdf2l1
			Sec14l1
			Sec62
			Sepw1
			Serf1
			Serpinc1
			Serpinh1
			Sesn2
			Setbp1
			Setd8
			Sf3b4
			Sh3bp5
			Sh3d19
			Sh3pxd2a
			Sh3rf1
			Shb
			Shc2
			Shox2
			Sik1
			Sik2
			Sipa1l2
			Ski
			Slc25a38
			Slc30a1
			Slc36a1
			Slc39a13
			Slc5a3
			Slc7a1
			Smad1
			Smad6
			Smad7
			Smad9
			Smarcc2
			Snai1
			Snai2
			Snrk
			Snrnp48
			Snrpa
			Snrpb
			Snx8
			Socs3
			Sorbs3
			Sox4
			Sox9
			Spen
			Sphk2
			Spsb1
			Spsb2
			Spty2d1
			Sqstm1
			Srebf2
			Srgap1
			Ssbp3
			St13
			Stam
			Stc2
			Steap3
			Stip1
			Stk10
			Stk35
			Stk40
			Ston1
			Supt5h
			Surf6
			Sycp1
			Syde1
			Syne2
			Synj2
			Syt11
			Syvn1
			Tada3l
			Taf15
			Taf3
			Tanc1
			Taok3
			Tapbpl
			Tars2
			Tbpl1
			Tbx3
			Tcf4
			Tcfap2a
			Tcfap4
			Tcof1
			Tead1
			Tef
			Tenc1
			Tgm2
			Thap2
			Timm17b
			Timp3
			Tmed8
			Tmem119
			Tmem66
			Tmem86a
			Tmsb10
			Tnfsf9
			Tnk2
			Tnrc18
			Tnrc6c
			Tpm1
			Tpm2
			Traf3ip1
			Trafd1
			Tram2
			Trappc6b
			Trerf1
			Trim2
			Trim46
			Trim65
			Trim66
			Trim8
			Trio
			Trip10
			Tsc22d3
			Tsc22d4
			Ttf1
			Ttll3
			Ttyh3
			Tubb2a
			Tubgcp4
			Txnip
			Uap1l1
			Ubb
			Ubc
			Ube2h
			Ubl3
			Ubqln1
			Ubtf
			Ubxn1
			Ubxn2a
			Unc5b
			Usp36
			Uspl1
			Utrn
			Vegfa
			Vps18
			Vps26a
			Vps37c
			Wasf1
			Wbp2
			Wdfy3
			Wdr60
			Wdr78
			Wdr81
			Whrn
			Whsc1l1
			Wipf1
			Wipf2
			Wisp1
			Wiz
			Xrcc1
			Ywhag
			Zbtb2
			Zbtb20
			Zbtb24
			Zbtb38
			Zbtb4
			Zbtb40
			Zbtb7a
			Zc3h18
			Zc3h3
			Zc3hav1
			Zcchc2
			Zeb2
			Zfand2a
			Zfand3
			Zfhx3
			Zfp12
			Zfp142
			Zfp161
			Zfp217
			Zfp238
			Zfp295
			Zfp319
			Zfp353
			Zfp362
			Zfp367
			Zfp36l1
			Zfp385a
			Zfp408
			Zfp429
			Zfp467
			Zfp503
			Zfp516
			Zfp521
			Zfp53
			Zfp623
			Zfp64
			Zfp646
			Zfp652
			Zfp691
			Zfp768
			Zfp777
			Zfp84
			Zfyve19
			Zhx2
			Zmat3
			Zmiz1
			Zmiz2
			Zmynd8
			Znfx1
			Zrsr2
			Zscan20
			Zscan29

## Sheet: Gene_Tu
# of Genes	Tu45min	Tu135min	Tu405min
UP	586	211	2403
DOWN	349	184	2659
Tu45up	Tu45down		Tu135up	Tu135down		Tu405up	Tu405down
1110012J17Rik	0610009B22Rik		1810011O10Rik	0610009B22Rik		0610007C21Rik	1110007A13Rik
1500002O20Rik	1110002B05Rik		4931406H21Rik	1110002B05Rik		0610007L01Rik	1110012J17Rik
1500012F01Rik	1110020P15Rik		9030025P20Rik	1110020P15Rik		0610007P14Rik	1110037F02Rik
1700010I14Rik	1200009F10Rik		A430105I19Rik	2010107E04Rik		0610007P22Rik	1190002N15Rik
1700021K19Rik	1810063B05Rik		A430110N23Rik	2310004I24Rik		0610009O20Rik	1200003C05Rik
1810007M14Rik	2210023G05Rik		Abi1	2700097O09Rik		0610010K14Rik	1200009F10Rik
1810011O10Rik	2310016M24Rik		Acsf2	4930547N16Rik		0610037L13Rik	1300014I06Rik
1810031K17Rik	2310061C15Rik		Aff1	Acsl5		0610038B21Rik	1500003O03Rik
1810032O08Rik	2700094K13Rik		Apbb1ip	Actl6a		1110003E01Rik	1700008J07Rik
2410025L10Rik	2810025M15Rik		Apbb2	Adam12		1110004E09Rik	1700017B05Rik
2610008E11Rik	2810452K22Rik		Aph1a	Adk		1110007C09Rik	1700020I14Rik
2610305D13Rik	3110039M20Rik		Apob48r	Agpat5		1110008F13Rik	1700022C21Rik
2700007P21Rik	9130011J15Rik		Arhgef2	Alcam		1110008J03Rik	1700025G04Rik
2810008D09Rik	Abca1		Arid5b	Aldh1a1		1110008P14Rik	1700040I03Rik
2810021J22Rik	Acat2		Arl2bp	Anxa3		1110018J18Rik	1700049G17Rik
2810474O19Rik	Acsl5		Atf4	Arl6ip1		1110032A13Rik	1700052N19Rik
3010026O09Rik	Acta2		Atn1	Aspn		1110038B12Rik	1700054N08Rik
3110048L19Rik	Adam12		Bak1	Atp2c1		1110038F14Rik	1700094D03Rik
4632411B12Rik	Adk		Bat2	Atp5f1		1110049F12Rik	1810022K09Rik
4922501C03Rik	Agpat5		Bcl2	Atp6ap2		1110051M20Rik	2010106G01Rik
4930432O21Rik	Aif1l		Begain	BC023882		1110067D22Rik	2010107E04Rik
4930473A06Rik	Ak3l1		Bhlhe40	Bud31		1190002H23Rik	2210018M11Rik
4932415G12Rik	Aldh1a1		Brd2	Cacna1g		1190007I07Rik	2210408I21Rik
4933407H18Rik	Alg14		Brd4	Cav2		1200014M14Rik	2310002J21Rik
4933421E11Rik	Ankrd37		C130039O16Rik	Ccnb1		1300018I17Rik	2310008H09Rik
4933427D14Rik	Anxa5		C77080	Cd24a		1500002O20Rik	2310014H01Rik
6330416G13Rik	Ap2s1		Cblb	Cd302		1500011B03Rik	2310014L17Rik
8430406I07Rik	Apcdd1		Ccdc130	Cd9		1500011K16Rik	2410089E03Rik
9030025P20Rik	Arhgap19		Ccdc57	Chchd2		1500012F01Rik	2610029I01Rik
9030425E11Rik	Arl4c		Ccnk	Chordc1		1500035H01Rik	2610101N10Rik
9130008F23Rik	Arl6ip1		Cd248	Cks2		1500041N16Rik	2610204M08Rik
9130023H24Rik	Arpc5		Cdr2l	Clca1		1600012F09Rik	2610209A20Rik
9430008C03Rik	Aspm		Chac1	Cnih4		1600027N09Rik	2610507B11Rik
9630058J23Rik	Aspn		Cited2	Copb1		1700010I14Rik	2700049A03Rik
A430105I19Rik	Atp1b3		Ciz1	Cox6b1		1700019E19Rik	2810021G02Rik
A630007B06Rik	Atp5e		Col16a1	Cox7c		1700021F05Rik	2810408P10Rik
A630033E08Rik	Atp5f1		Col27a1	Cse1l		1700024P16Rik	2810452K22Rik
AA415398	Atp5j2		Col28a1	Cyp20a1		1700086O06Rik	2810474O19Rik
Abca8b	Atp5l		Col5a1	Ddah1		1700106N22Rik	2900097C17Rik
Abi1	Atp8b2		Col5a3	Dhrs7b		1700123O20Rik	3110039M20Rik
Accs	Aurkb		Cpeb4	Dnajc15		1810006K21Rik	3830406C13Rik
Acot2	B4galt5		Creb3l1	Dnajc19		1810007M14Rik	4632415K11Rik
Acsbg1	Birc5		Cry2	Dnajc24		1810008A18Rik	4732418C07Rik
Acvr1	Bok		Ctage5	Dusp12		1810029B16Rik	4732471D19Rik
Adamts6	Bud31		Ddit3	Ebp		1810031K17Rik	4831426I19Rik
Aff1	Cacna1g		Ddit4	Eif1ay		1810032O08Rik	4921513D23Rik
Agpat9	Calm1		Dhrs3	Eif3e		1810043G02Rik	4921536K21Rik
Ahr	Cand1		Dlgap2	Eif4a2		1810043H04Rik	4930402E16Rik
Akap8l	Cav2		Dlgap4	Enpp2		1810055G02Rik	4930422G04Rik
Akap9	Cbr3		Dnajb2	Ergic2		1810058I24Rik	4930427A07Rik
Akna	Ccnb1		Dopey2	Erh		1810074P20Rik	4930451C15Rik
Aldh1l2	Ccnb2		Egr1	Fabp5		2010002N04Rik	4930523C07Rik
Alpk1	Ccnf		Egr2	Faf1		2010007H12Rik	4930534B04Rik
Amotl2	Cd151		Ell	Fam55c		2010015L04Rik	4930546H06Rik
Ankrd1	Cd24a		Etl4	Fancb		2200002D01Rik	4930547N16Rik
Ankrd11	Cd300lb		Etv4	Fbln5		2210012G02Rik	4930579G24Rik
Ankrd44	Cd302		Etv6	Fgfr1op		2210016L21Rik	4931406H21Rik
Ankzf1	Cd320		Fam110c	Fmod		2300009A05Rik	4931408A02Rik
Antxr2	Cd9		Fam134b	Fnta		2310003F16Rik	4931428F04Rik
Ap4b1	Cda		Fam59a	Gcsh		2310004N24Rik	4932438A13Rik
Apbb2	Cdc20		Fblim1	Gdi2		2310007H09Rik	4933408B17Rik
Apob48r	Cdc25a		Fbrs	Glo1		2310009B15Rik	4933411K20Rik
Apobec1	Cdc2a		Fmnl2	Glrx3		2310016C08Rik	5031439G07Rik
Apoo	Cdc42ep2		Fos	Gm13242		2310036O22Rik	5430435G22Rik
Arhgap17	Cdk2ap1		Foxj3	Gm9199		2310039H08Rik	5730403M16Rik
Arhgap24	Cenpa		Foxp1	Hadhb		2310047B19Rik	5730494M16Rik
Arhgap5	Cerk		Foxp4	Hif1a		2310061I04Rik	5730559C18Rik
Arhgef2	Chchd2		Frmd4a	Hsp90aa1		2310061J03Rik	5730590G19Rik
Arid5b	Chst7		Fxyd5	Igf2		2310065K24Rik	5730601F06Rik
Arl2bp	Cisd2		Fyb	Il1rl1		2310079N02Rik	5830417I10Rik
Armc5	Ckap2		Gadd45a	Impad1		2410001C21Rik	5830418K08Rik
Armc7	Cks2		Gadd45g	Itgb1		2410004B18Rik	6030422M02Rik
Arrdc4	Clca1		Gdnf	Itm2b		2410016O06Rik	6230409E13Rik
Asap1	Cmtm7		Gigyf1	Jagn1		2410025L10Rik	6330406I15Rik
Ascc2	Cnih4		Glis1	Lamp2		2410129H14Rik	6330503K22Rik
Atf4	Cops6		Glis2	Laptm4a		2510012J08Rik	6330577E15Rik
Atoh8	Cox4i1		Gm129	Lnx1		2510049I19Rik	6330578E17Rik
Atp6v0a1	Cox5a		Gm672	Lpar6		2610002J02Rik	6430527G18Rik
Atxn2l	Cox6b1		Gm8580	Magoh		2610002M06Rik	6530418L21Rik
AU041133	Cox7a2		Golga2	Mapk1		2610008E11Rik	9030625A04Rik
B3gntl1	Cox7b		Gpatch4	Med30		2610020H08Rik	9130019O22Rik
Baiap2l1	Cryab		Gps2	Mff		2610021K21Rik	9130023H24Rik
Bat4	Cse1l		Grit	Mif		2610024G14Rik	9430020K01Rik
Bbc3	Ctgf		H1f0	Mmd		2610028A01Rik	9530068E07Rik
Bbs10	Ctla2a		Hbegf	Mrpl33		2610110G12Rik	9530091C08Rik
BC031441	Cyb5r4		Hcfc1r1	Mrps14		2610305D13Rik	9930013L23Rik
BC032203	D4Bwg0951e		Herpud1	N6amt2		2610528E23Rik	9930021J03Rik
BC048403	Dad1		Hes1	Nat5		2700060E02Rik	A130022J15Rik
BC049807	Dctpp1		Hivep2	Ndufa9		2700062C07Rik	A130040M12Rik
Bcdin3d	Ddah1		Hoxa3	Npm3		2700078K21Rik	A230046K03Rik
Bcl6	Ddx39		Hoxa4	Nsmce1		2700089E24Rik	A230067G21Rik
Begain	Dnajb1		Id2	Nudcd1		2810002N01Rik	A230072C01Rik
Bhlhe40	Dnajb4		Ier2	Nup37		2810004N23Rik	A430033K04Rik
Bhlhe41	Dnajc15		Igfbp6	Nup43		2810008D09Rik	A430105I19Rik
Bnc2	Dnajc24		Inhba	Odc1		2810021B07Rik	A430107O13Rik
Brd2	Dohh		Irak2	Orc6l		2810408M09Rik	A430110N23Rik
Brf2	Dusp1		Itgam	Pcgf5		2810422J05Rik	A530082C11Rik
C030048B08Rik	Dusp6		Junb	Pdcd6		2810433K01Rik	A630047E20Rik
C130022K22Rik	Dynll2		Klf10	Pex7		2900006K08Rik	A630055G03Rik
C130039O16Rik	Dynlt1		Klf4	Pfdn4		2900064A13Rik	A830007P12Rik
C230081A13Rik	Ebp		Klf5	Pfn2		2900073G15Rik	Aacs
Cacnb2	Efna4		Lbh	Pigc		3010026O09Rik	Aak1
Calr4	Egln3		Lef1	Pkp2		3110009E18Rik	Abca1
Car6	Ehd1		Lgr6	Pno1		3110043O21Rik	Abca2
Cass4	Eif1ay		Lif	Polr1b		3110082I17Rik	Abca7
Cblb	Eif2s3x		Lpcat4	Polr2g		3230401D17Rik	Abcb10
Cbx4	Eif3i		Magi2	Polr3k		4833427G06Rik	Abcd2
Cc2d1b	Eif4a1		Map3k14	Pop5		4833439L19Rik	Abcd3
Ccdc122	Eif4ebp2		Mapre3	Ppa1		4921524J17Rik	Abcg2
Ccdc130	Eif5a		Mbd6	Ppih		4922501C03Rik	Abhd13
Ccdc137	Emp1		Mecp2	Ppp2ca		4930430F08Rik	Abhd2
Ccdc47	Emp3		Meis2	Prdx1		4930432O21Rik	Abi2
Ccdc55	Enoph1		Midn	Prl2c2		4930453N24Rik	Abl1
Ccdc57	Enpp4		Mpv17l2	Prmt3		4930455C21Rik	Abl2
Ccnt2	Ergic2		Msi2	Prokr1		4930578N16Rik	Ablim1
Ccrn4l	Erh		Mtap1a	Prps1		4932415G12Rik	Abr
Cd209c	Extl3		Myc	Psat1		4933421E11Rik	Acaca
Cdh11	Fabp5		Myd116	Psma3		4933424B01Rik	Acap3
Cdkn1b	Fam131b		Myst4	Psma5		5133400G04Rik	Acat2
Cdr2l	Fam55c		Nab2	Psmb3		5330426P16Rik	Accn2
Cebpb	Fam57a		Nav1	Psmb4		5330431N19Rik	Acly
Cebpd	Fam69a		Neat1	Psmc2		5430405H02Rik	Acpl2
Cebpg	Fam69b		Necap1	Psmd5		5430437P03Rik	Acsl3
Chac1	Fam83d		Nfix	Rab11a		5730408K05Rik	Acsl4
Chd2	Fancb		Nkx2-1	Rap1b		5730437N04Rik	Acsl5
Cirbp	Fasn		Nr4a1	Rcn2		5730455O13Rik	Acsl6
Cited2	Fen1		Nupr1	Rdh14		5730494N06Rik	Acss2
Ciz1	Fgfr1op		Osgin1	Rnf145		5730508B09Rik	Acta2
Clcn3	Fhl1		Otud7b	Romo1		5830433M19Rik	Actb
Cln8	Fmod		Pde4b	Rpl35a		5930416I19Rik	Actg1
Cnksr3	Fnbp1		Per1	Rpl39		6030419C18Rik	Actn1
Cnnm4	Frmd8		Per2	Rpl9		6030458C11Rik	Actn4
Col16a1	Gabarapl2		Per3	Rplp2		6330416G13Rik	Actr1a
Col27a1	Gas2l3		Phactr4	Rps10		6330416L07Rik	Actr2
Col28a1	Gcsh		Phc1	Rps13		6430548M08Rik	Acvr1b
Col5a3	Gjb3		Phf1	Rps15a		6530401N04Rik	Ada
Cpox	Gjb4		Phlda1	Rps21		6720401G13Rik	Adam10
Crtc3	Glrx		Pitpnc1	Rras2		6720456B07Rik	Adam12
Cry2	Glul		Plekho2	Rtcd1		8430406I07Rik	Adam17
Csrp1	Gm9199		Plk3	S100a4		9030025P20Rik	Adam19
Ctage5	Gm9294		Plxna4	S100a6		9030418K01Rik	Adam23
Cyb5r1	Gnb1		Pnn	Sccpdh		9130008F23Rik	Adam8
Cyr61	Gstp1		Polm	Sec61g		9130011E15Rik	Adamts1
D15Wsu169e	Gtf2h5		Polr3gl	Sephs2		9130401M01Rik	Adamts12
D16Ertd472e	Gtse1		Prpf38b	Serinc1		9430008C03Rik	Adamts14
D4Wsu53e	H2afz		Prr14	Shcbp1		9430016H08Rik	Adamts2
D6Wsu163e	Hadhb		Pura	Skp1a		9530008L14Rik	Adamts7
Daam1	Has2		Rarg	Slc19a2		9530058B02Rik	Adamtsl1
Dand5	Hbxip		Raver1	Slc25a3		9630025I21Rik	Adamtsl4
Dclk2	Hiat1		Rel	Slc30a5		A430005L14Rik	Adarb1
Ddit3	Hn1		Rere	Slc35a1		A630007B06Rik	Adcy6
Ddit4	Hprt1		Rgs16	Slc35b4		A630033E08Rik	Adcy7
Ddx26b	Hras1		Rhox8	Slc39a10		A730011L01Rik	Adipor2
Ddx42	Hsp90aa1		Rin1	Slc7a6		AA408296	Adk
Dhrs3	Hspa1b		Rnasek	Snrpe		AA415398	Adnp
Dhrs9	Hspa8		Rngtt	Snrpg		AA960436	Ado
Dlc1	Hyal2		Rrbp1	Snx5		Aasdhppt	Adora2b
Dlgap2	Idh1		Runx2	Spopl		Aatf	Aff3
Dlgap4	Igf2		Scly	Stt3a		Abca8b	Aff4
Dnaja3	Impad1		Secisbp2	Taf9		Abcc10	Agap2
Dnajb9	Insig1		Sepw1	Tcp1		Abcc4	Agfg2
Dnajc1	Ipo11		Sertad4	Thoc7		Abhd11	Aggf1
Dnajc28	Irgm1		Sesn2	Timm8b		Abhd5	Agl
Dnmbp	Isca1		Setbp1	Tm9sf3		Abi1	Agps
Dopey2	Itga3		Sf3a2	Tmbim4		Acaa1a	Agrn
Dpf2	Kbtbd4		Sh3d19	Tmeff2		Acad10	Agtpbp1
Dub1	Kcnj15		Sik2	Tmem106b		Acad11	Ahctf1
Dus4l	Kdelr3		Slc30a1	Tmem147		Acad8	Ahcyl1
E130311K13Rik	Kif20a		Smad1	Tmem188		Acbd4	Ahdc1
Ebag9	Kif2c		Smad7	Tsn		Acbd6	Ahnak
Ebf1	Klhdc8a		Smarcc2	Tspan3		Accs	AI314180
Echdc3	Klhl21		Snai1	Tuba1b		Acd	AI464131
Edn1	Klhl9		Snx12	Tubd1		Acn9	AI480653
Ednra	Kpna2		Socs3	Tusc3		Acot13	Aif1l
Eea1	Laptm4a		Sorbs3	Unc50		Acot2	Aim1
Eif3a	Ldha		Sox12	Vdac1		Acot8	Ak1
Ell	Lepr		Sox5	Vdac3		Acp6	AK220484
Emx2	Lmnb1		Sox9	Wdr61		Acsf3	Ak3
Enox1	Loxl2		Sp2	Wdr75		Acsl1	Ak3l1
Eps8	Lpcat1		Spred3	Wrb		Actr8	Akap13
Ern1	Lsmd1		Spry4	Yars2		Acvr1	Akap2
Ero1l	Ly6a		Srrm1	Yy1		Acyp1	Akt1
Esyt1	Magee1		Ssbp3	Zdhhc13		Adal	Akt3
Etl4	Magoh		Stk40	Zfp97		Adat2	Alcam
Ets2	Mapk14		Ston1			Adck2	Aldh1a1
Etv5	Marcksl1		Sycp1			Adfp	Aldh1a7
F3	Med28		Synpo			Adh5	Alkbh8
Fam110c	Med29		Tcf7l2			Adh7	Alms1
Fam122a	Met		Tcof1			Adhfe1	Als2
Fam134b	Mex3a		Tef			Adi1	Amigo2
Fam13c	Mex3d		Tenc1			Adpgk	Ammecr1
Fam164a	Mgat3		Tgfb1i1			Adprh	Ammecr1l
Fam171b	Mgst1		Tsc22d3			Adsl	Amot
Fam175a	Mif		Txnip			Afap1	Amz2
Fam59a	Mmd		Vamp2			Aff1	Anapc1
Fbrs	Mrpl18		Vegfa			Aga	Anapc2
Fbxl12	Mrpl30		Vps37c			Agap1	Anapc4
Fbxl20	Mrpl33		Wasf1			Agpat9	Anapc5
Fbxl7	Mrpl53		Wbp2			Agtrap	Angpt1
Fbxo38	Mtpn		Wipf1			Ahi1	Angpt2
Fbxo42	Nat5		Wipf2			Ahr	Angptl2
Fbxo6	Ndufa2		Wiz			AI316807	Angptl4
Fgfbp3	Ndufa4		Zfp295			AI846148	Ank
Fhl3	Ndufa9		Zfp318			AI847670	Ank3
Fibin	Ndufb8		Zfp362			AI848100	Ankfy1
Filip1l	Npm3		Zfp36l1			Aig1	Ankhd1
Fip1l1	Npnt		Zfp385a			Aimp1	Ankle1
Fkbp15	Nsmce1		Zfp408			Aip	Ankle2
Fmnl2	Nudcd1		Zhx3			Ak5	Ankmy2
Fn1	Nutf2		Zmiz1			Akap8l	Ankrd13c
Foxj3	Odc1		Zxdc			Akirin2	Ankrd17
Foxo3	Orc1l					Akna	Ankrd26
Foxp1	Ormdl2					Akr1a4	Ankrd28
Frmd4a	Pank4					Akr1b10	Ankrd32
Fyb	Pbld					Akr7a5	Ankrd44
Fyn	Pdcd6					Akt1s1	Ankrd49
Fzd1	Pfdn1					Alad	Ankrd50
Fzd4	Pfkl					Aldh18a1	Ankrd52
Gab2	Pgam1					Aldh1l2	Ankrd6
Gadd45a	Pgp					Aldh6a1	Anks1b
Gadd45b	Phb					Alg1	Anln
Gadd45g	Phf13					Alg12	Ano6
Gas7	Phf5a					Alg2	Antxr1
Gata3	Pigc					Alg3	Anxa1
Gata4	Plau					Alg5	Anxa8
Gcc1	Plk1					Alkbh2	Aof1
Gdnf	Pnp1					Alkbh3	Aox1
Glis1	Polr2g					Alkbh6	Ap1b1
Glis3	Polr2l					Alkbh7	Ap1g1
Gm114	Polr3k					Als2cl	Ap2a2
Gm129	Pop5					Amacr	Ap2b1
Gm14137	Postn					Amn1	Ap4e1
Gm4769	Ppa1					Amotl2	Ap4m1
Gm4979	Ppp1r16b					Ampd2	Apaf1
Gm9743	Ppp1r3d					Ampd3	Apbb2
Gng8	Prdx1					Anapc13	Apc
Golga3	Prmt1					Ank2	Apcdd1
Golgb1	Prokr1					Ankrd1	Apeh
Gorab	Prps1					Ankrd11	Api5
Gps2	Prps2					Ankrd13b	Apitd1
Gpt2	Psma3					Ankrd24	Apln
Grem1	Psma5					Anks3	Apool
Gt(ROSA)26Sor	Psmb3					Anks6	Aqp1
Gtpbp2	Ptgfr					Ankzf1	Arf3
H1f0	Rab11a					Anp32b	Arfgef2
Hcfc1r1	Rab31					Antxr2	Arhgap18
Hdac4	Ramp3					Anxa9	Arhgap19
Hdac9	Ran					Ap2m1	Arhgap22
Herpud1	Rangap1					Apba1	Arhgap24
Hist1h1c	Rap1b					Apba3	Arhgap28
Hist2h2be	Rassf3					Apbb1ip	Arhgef10l
Hist3h2a	Rc3h1					Apex1	Arhgef12
Hivep2	Rgmb					Apip	Arhgef19
Hk2	Rnaseh2c					Apoa1bp	Arhgef5
Hlf	Rnf145					Apob48r	Arid1b
Hoxa4	Romo1					Apobec1	Arl4c
Htra1	Rpl15					Apoo	Arl5a
Ick	Rpl9					Aptx	Arl6ip1
Id2	Rplp1					Ard1a	Arpc4
Id3	Rplp2					Arf2	Arpc5
Ifit1	Rps10					Arfgap3	Arrb1
Igfbp6	Rps13					Arfip2	Arrdc3
Il1rl2	Rps14					Arhgap17	Asah2
Ing3	Rps21					Arhgap5	Asap1
Ints6	Rrm1					Arhgef1	Asb1
Iqcc	Rtcd1					Arhgef10	Asb4
Irf2	S100a11					Arhgef2	Asf1b
Irf5	S100a4					Arl13b	Ash1l
Irx1	S100a6					Arl15	Aspm
Itfg2	Scd3					Arl2bp	Aspn
Itga7	Sdhd					Arl3	Asxl1
Itgb2	Sec61b					Arl6ip5	Atad1
Itprip	Sephs2					Arl8a	Atad2
Jag1	Serinc1					Armc7	Atad5
Jak2	Serpine1					Armcx1	Atf7ip
Jdp2	Sfrp1					Armcx2	Atf7ip2
Katnal1	Sfrp2					Armcx3	Atg2a
Kcnma1	Sigmar1					Armcx6	Athl1
Kctd15	Skp1a					Arpc5l	Atl3
Kctd18	Slc15a4					Arrdc4	Atm
Kidins220	Slc19a2					Asah1	Atp10a
Kif7	Slc25a3					Ascc1	Atp10d
Klf10	Slc30a5					Ascc2	Atp11a
Klf11	Slc35a1					Asf1a	Atp11c
Klf2	Slc35a4					Asna1	Atp13a3
Klf4	Slc35b4					Aspscr1	Atp1b1
Klf5	Slc39a10					Atad3a	Atp1b3
Klf9	Slc5a3					Atf4	Atp2c1
Kri1	Slc5a6					Atf5	Atp5l
Lactb	Slc7a6					Atf6	Atp6ap1
Lef1	Slco3a1					Atf6b	Atp6v1a
Lgals8	Snrnp25					Atg16l2	Atp7a
Lgr6	Snrpg					Atg3	Atp8b2
Lif	Snx3					Atg4c	Atp8b4
Lima1	Spcs3					Atg5	Atr
Lmo4	Srd5a1					Atl1	Atrn
LOC106740	St3gal4					Atn1	Atrnl1
Lonp1	Stxbp2					Atp2a2	Atrx
Lonrf1	Sulf1					Atp5g2	Atxn1l
Lphn3	Tagln					Atp5s	AU040829
Lrrc16a	Tfrc					Atp5sl	AW551984
Lrrc17	Timm13					Atp6v0d1	AW555464
Lrrc8d	Timm8b					Atp6v1f	Axl
Lrrfip2	Timp1					Atp6v1g1	B230380D07Rik
Magi1	Tm4sf1					Atpaf2	B3galnt1
Magi2	Tmed5					Atpbd3	B3gnt1
Magi3	Tmeff2					Atxn2l	B3gnt5
Map3k13	Tmem106b					AU040320	B4galt1
Mbd6	Tmem147					Auh	B4galt5
Mdfic	Tmem170b					Aup1	B4galt6
Meaf6	Tmem183a					AV249152	Bace1
Mecp2	Tmem188					Avpi1	Bach1
Med26	Tmem2					AW146242	Bahcc1
Meg3	Tmem64					AW209491	Baiap2
Megf10	Tmem97					Azi1	Bambi
Mgst2	Tmsb4x					Azin1	Bard1
Mid1ip1	Tnfaip8l1					B230312A22Rik	Bat2d
Mitf	Tnfsf9					B230315N10Rik	Baz1a
Mknk1	Tpi1					B2m	Baz1b
Mt2	Tprgl					B3galnt2	Baz2b
Mtap1b	Traf4					B4galt3	Bbs12
Mtbp	Trappc1					B9d1	Bbs9
Mthfr	Trappc2l					Bad	Bbx
Mtm1	Tspan3					Bag3	BC016423
Mtmr3	Tuba1a					Bag5	BC023179
Mtus1	Tuba1b					Baiap2l1	BC023744
Murc	Tuba1c					Banp	BC023882
Mus81	Tuba4a					Basp1	BC028528
Myc	Tubb2c					Bat1a	BC031748
Myd116	Tubb5					Bat2	BC043301
Myst4	Tug1					Bat4	BC055324
Napb	Txn1					Bat5	BC057893
Neat1	Unc50					Bax	Bcar3
Nedd4l	Uqcrfs1					Bbc3	Bcl2l1
Nfe2l1	Vamp8					Bbs5	Bcl2l11
Nfil3	Vcp					BC003331	Bcl7a
Nfkbil1	Vdac1					BC003940	Bcor
Nfx1	Wdr6					BC004004	Bcorl1
Nfxl1	Wdr61					BC005537	Bcr
Ngrn	Wnt5a					BC005624	Bend3
Nhlrc3	Wsb2					BC006779	Bgn
Nop14	Wtip					BC011248	Bhlhe40
Nr4a1	Yars2					BC013529	Bicc1
Nr4a2	Ywhae					BC017158	Birc6
Nrg1	Yy1					BC019943	Bivm
Nrip1	Zbed4					BC023814	Blm
Nudt6	Zfp36l2					BC024479	Bmf
Nupr1	Zfp97					BC024659	Bmp1
Optn	Znhit3					BC024814	Bmper
Osgin1						BC031181	Bmpr1a
Osmr						BC031441	Bmpr2
Osr1						BC037034	Bnc1
Otub2						BC048403	Bnc2
Otud7b						BC052040	Bod1l
Oxnad1						BC053749	Bok
P2rx5						Bcap29	Bpil2
Pawr						Bcas2	Bptf
Pcdh19						Bcat1	Braf
Pctk2						Bcat2	Brap
Pde4b						Bccip	Brca1
Pde4dip						Bcdin3d	Brca2
Pdzd8						Bcl10	Brip1
Per2						Bcl7b	Brunol5
Per3						Bcl7c	Brwd3
Phf10						Becn1	Btaf1
Pigp						Begain	Btbd11
Pik3r1						Bend6	Btbd12
Pitpnc1						Bet1	Btbd3
Plag1						Bfar	Btbd7
Plcb1						Bglap-rs1	Btrc
Plekha4						Bid	Bub1
Plk2						Bin3	Bub1b
Plxna4						Bloc1s2	Bud31
Pnrc2						Bloc1s3	C1galt1
Poli						Blzf1	C1qtnf1
Polm						Bnip1	C1qtnf6
Polr3gl						Bola1	C230081A13Rik
Ppapdc2						Bola2	C230096C10Rik
Ppargc1a						Bphl	C2cd3
Ppig						Bpnt1	C330019G07Rik
Ppox						Brf2	C330027C09Rik
Ppp1r12a						Bri3	Cab39l
Ppp3ca						Bri3bp	Cacna1g
Ppp3cc						Brp16	Cacnb3
Prdm5						Brp44	Calm1
Prkab2						Brp44l	Calm3
Prpf38b						Brwd1	Camk2g
Prpf40b						Bsdc1	Camk4
Prr14						Bst2	Camkk1
Prune2						Btf3l4	Camkk2
Ptx3						Btg1	Camsap1l1
Pvr						Bxdc5	Cand1
Rab27b						Bysl	Cand2
Rab39b						C030044B11Rik	Capn2
Rab3c						C030048B08Rik	Capza1
Rad52						C130022K22Rik	Car10
Rai14						C130039O16Rik	Car5b
Rarg						C1qbp	Card6
Rassf8						C230094A16Rik	Casc5
Rbm39						C2cd2l	Caskin1
Rbm47						C430004E15Rik	Casp12
Rccd1						C530028O21Rik	Casp2
Rcor3						C630043F03Rik	Casp3
Rdh10						C80913	Casp6
Recql4						Calcoco1	Casp8ap2
Refbp2						Calr	Casp9
Rel						Camk1	Cav1
Rela						Camk2n2	Cav2
Repin1						Caml	Cbfa2t2
Rfesd						Camta1	Cbl
Rgl3						Capn10	Cbr3
Rgnef						Capn6	Cbx5
Rgs3						Car6	Cbx6
Rhbdd1						Carkd	Cc2d1a
Rin1						Cars	Ccbe1
Rnd1						Casc3	Ccdc123
Rnf149						Casp4	Ccdc14
Rnf214						Cass4	Ccdc157
Rsbn1						Cast	Ccdc24
Rsf1						Cat	Ccdc6
Rsrc2						Cblb	Ccdc80
Rtp3						Cbx4	Ccdc85a
Runx1t1						Cby1	Ccdc88a
Runx2						Ccdc101	Cck
Rusc2						Ccdc104	Cckar
Samd4						Ccdc107	Ccl2
Sash1						Ccdc109b	Ccl7
Scly						Ccdc111	Ccm2
Sec16b						Ccdc112	Ccna2
Sepw1						Ccdc115	Ccnb1
Sesn2						Ccdc12	Ccnb2
Setbp1						Ccdc122	Ccnd1
Sf4						Ccdc127	Ccnd3
Sgtb						Ccdc130	Ccne1
Sh3bp5						Ccdc137	Ccne2
Sh3d19						Ccdc32	Ccnf
Shox2						Ccdc43	Ccng1
Siah2						Ccdc44	Ccnj
Sik2						Ccdc47	Ccnt1
Skil						Ccdc49	Ccnyl1
Slc1a4						Ccdc53	Cd109
Slc23a2						Ccdc55	Cd14
Slc25a30						Ccdc57	Cd151
Slc30a1						Ccdc59	Cd163
Slc38a7						Ccdc76	Cd164
Slc3a2						Ccdc77	Cd247
Slc6a9						Ccdc84	Cd248
Slc7a1						Ccdc86	Cd24a
Slc7a5						Ccdc9	Cd276
Smad1						Ccdc90b	Cd2ap
Smad3						Ccl9	Cd300a
Smg6						Ccnh	Cd300lb
Snai2						Ccnk	Cd320
Snapc4						Ccs	Cd34
Snapin						Cd2bp2	Cd44
Snrnp48						Cd47	Cd55
Snx26						Cd82	Cd81
Soat2						Cdc26	Cd84
Sorbs1						Cdc2l1	Cd9
Sorbs3						Cdc42bpa	Cd93
Sox4						Cdc42ep3	Cd97
Sox5						Cdc42se1	Cd99l2
Spata7						Cdc42se2	Cdan1
Spsb2						Cdc45l	Cdc14b
Sqstm1						Cdc6	Cdc16
Srfbp1						Cdh19	Cdc25a
Srgap1						Cdipt	Cdc25b
Stard5						Cdk10	Cdc27
Stc2						Cdk2ap2	Cdc2l6
Stk3						Cdk5rap3	Cdc42
Stk40						Cdk7	Cdc42ep1
Stoml1						Cdk8	Cdc42ep2
Surf6						Cdk9	Cdc42ep4
Suv420h1						Cdkn1b	Cdc7
Sycp1						Cdkn2aip	Cdgap
Syne2						Cdr2l	Cdh2
Synj2						Cebpb	Cdh26
Syvn1						Cebpg	Cdk2
Tacc2						Cenpq	Cdk5r1
Tanc1						Cenpv	Cdk5rap2
Tanc2						Cept1	Cdk6
Tcfap2a						Cetn3	Cdkal1
Tcfcp2						Cetn4	Cdo1
Tchp						Cfdp1	Cds2
Tenc1						Cggbp1	Cdt1
Tgfb1i1						Cgref1	Ceacam1
Tgif1						Cgrrf1	Cenpb
Thbd						Chac1	Cenpe
Timp3						Chchd1	Cenpf
Tlk2						Chchd5	Cenpi
Tm2d1						Chchd6	Cenpj
Tmem154						Chchd7	Cep135
Tmem86a						Chd2	Cep152
Tnfaip2						Chek2	Cep170
Tnfaip3						Chic2	Cep192
Tnik						Chid1	Cep250
Tnnc1						Chka	Cep290
Tor3a						Chkb	Cerk
Traf2						Chmp1b	Cetn2
Traf3ip2						Chmp2a	Cgn
Traf5						Chmp2b	Cgnl1
Trim39						Chmp4b	Chaf1a
Trim46						Chmp5	Chaf1b
Trim66						Chmp6	Chd3
Trim8						Chrac1	Chd4
Trps1						Chtf8	Chd8
Tsc22d3						Ciapin1	Chd9
Tspyl4						Cir1	Chek1
Ttc17						Cirbp	Chfr
Ttc39b						Cisd1	Chml
Txnip						Cited2	Chmp7
Uhrf1bp1						Ciz1	Chordc1
Unk						Cks1b	Chpf
Usp11						Clcn3	Chpf2
Usp36						Clint1	Chrna1
Usp53						Clip3	Chst1
Usp6nl						Clk2	Chst11
Vegfa						Cln8	Chst2
Vldlr						Clpp	Chst7
Vps37c						Clptm1l	Chsy1
Vps39						Clta	Chtf18
Wdr60						Cluap1	Cic
Wdr67						Clybl	Cit
Wfs1						Cmc1	Ckap2
Wisp1						Cmpk1	Ckap4
Wiz						Cnih	Ckap5
Xbp1						Cnksr3	Clasp1
Xdh						Cnnm2	Clasp2
Zbtb10						Cno	Clca1
Zbtb24						Cnot3	Clcn5
Zbtb38						Cnpy2	Cldn12
Zc3h6						Cnpy3	Clec16a
Zc3h8						Coasy	Clic1
Zc3hav1						Cog3	Clip2
Zeb1						Cog6	Clip4
Zeb2						Cog8	Cln3
Zfp1						Commd3	Clock
Zfp112						Commd6	Clspn
Zfp12						Commd7	Clstn1
Zfp128						Commd9	Cltc
Zfp187						Comtd1	Cmah
Zfp192						Cope	Cmtm4
Zfp202						Copz2	Cnih2
Zfp238						Coq10a	Cnot1
Zfp263						Coq10b	Cnot6
Zfp295						Coq3	Cnot6l
Zfp316						Coq4	Cnpy4
Zfp318						Coq5	Cobll1
Zfp362						Coq9	Cog4
Zfp365						Cox16	Col11a1
Zfp36l1						Cox17	Col12a1
Zfp40						Cox18	Col1a1
Zfp408						Cox5b	Col1a2
Zfp414						Cox6a1	Col3a1
Zfp429						Cox7a2l	Col4a1
Zfp451						Cox8a	Col4a2
Zfp493						Cpeb1	Col4a3bp
Zfp51						Cpeb3	Col6a1
Zfp516						Cpne8	Col6a2
Zfp58						Cpox	Col7a1
Zfp608						Cr1l	Col8a1
Zfp61						Cradd	Colec12
Zfp622						Crcp	Copb1
Zfp623						Creb3	Copb2
Zfp639						Creb3l1	Copg2
Zfp64						Creb3l2	Cops2
Zfp646						Creg1	Coro1c
Zfp647						Creld2	Cox6b1
Zfp661						Crls1	Cox7a2
Zfp691						Crtc3	Cox7b
Zfp760						Cry1	Cp
Zfp768						Cry2	Cpd
Zfp777						Cryz	Cplx2
Zfp93						Cryzl1	Cpne3
Zfp94						Csda	Cpsf1
Zfpm2						Csf2rb2	Cpt1a
Zfyve19						Csnk2a2	Cramp1l
Zfyve20						Csrp1	Crat
Zhx2						Ctage5	Crim1
Zkscan1						Ctbp2	Crk
Zmat1						Ctdsp1	Crlf3
Zmiz1						Cth	Crocc
Zscan20						Ctns	Crot
Zscan22						Ctsk	Crx
Zscan29						Ctsl	Cryab
Zyg11b						Cuedc2	Crybg3
						Cuta	Csde1
						Cwc15	Cse1l
						Cyb5r1	Csf1
						Cyba	Csf3r
						Cyld	Csnk2a1
						Cyp4v3	Cspg4
						Cyr61	Csrnp1
						Cyth2	Csrnp2
						D10Ertd641e	Cstf2t
						D11Wsu99e	Ctdp1
						D15Wsu169e	Ctdsp2
						D16Ertd472e	Ctdspl
						D17Wsu104e	Ctgf
						D19Ertd737e	Ctla2a
						D230037D09Rik	Ctla2b
						D2Ertd391e	Ctnnal1
						D4Wsu53e	Ctnnb1
						D6Wsu163e	Ctnnd1
						D8Ertd82e	Ctps2
						D9Ertd402e	Ctr9
						Dagla	Cttn
						Dalrd3	Cttnbp2nl
						Dand5	Cubn
						Dapk3	Cugbp1
						Dapp1	Cugbp2
						Daxx	Cul1
						Dazap1	Cul4b
						Dcaf4	Cul7
						Dci	Cx3cr1
						Dclk2	Cxcl12
						Dcp1b	Cyb5b
						Dcps	Cyb5d2
						Dctd	Cyb5r4
						Dctn3	Cyfip1
						Dctn6	Cyp1b1
						Dcun1d3	Cyp39a1
						Dcun1d4	Cyp51
						Dcun1d5	Cyth3
						Dda1	Cytip
						Ddit3	Cytsa
						Ddit4	D030074E01Rik
						Ddost	D10Wsu102e
						Ddrgk1	D14Abb1e
						Ddt	D15Ertd621e
						Ddx18	D16H22S680E
						Ddx26b	D17Wsu92e
						Ddx27	D18Ertd653e
						Ddx28	D19Wsu162e
						Ddx49	D330038O06Rik
						Ddx50	D3Ertd254e
						Ddx59	D5Ertd579e
						Deb1	D630037F22Rik
						Dedd	D930015E06Rik
						Dennd1a	Daam2
						Dennd4a	Dab2
						Derl1	Dab2ip
						Derl2	Dag1
						Det1	Dars2
						Dgcr14	Dazap2
						Dguok	Dbc1
						Dhdds	Dbi
						Dhodh	Dbn1
						Dhps	Dcaf15
						Dhrs11	Dcaf7
						Dhrs3	Dcp2
						Dhrs4	Ddah1
						Dhrs7	Ddah2
						Dhrs9	Ddb1
						Dhx40	Ddc8
						Dimt1	Ddhd1
						Dip2c	Ddhd2
						Dlat	Ddx1
						Dlgap4	Ddx11
						Dlk1	Ddx17
						Dlx2	Ddx19b
						Dmap1	Ddx23
						Dnaja3	Ddx3x
						Dnajb11	Ddx3y
						Dnajb2	Ddx6
						Dnajb9	Def8
						Dnajc1	Dennd1b
						Dnajc17	Dennd2a
						Dnajc21	Dennd2c
						Dnajc25	Dennd4c
						Dnajc3	Dennd5a
						Dnajc30	Depdc5
						Dnajc4	Dgcr2
						Dnajc8	Dgcr8
						Dnm2	Dgke
						Dnpep	Dhcr24
						Dnttip1	Dhcr7
						Dolpp1	Dhfr
						Dopey2	Dhx38
						Dpagt1	Dhx58
						Dpf2	Dhx8
						Dph5	Dhx9
						Dqx1	Diap1
						Dr1	Dicer1
						Drap1	Dido1
						Dtd1	Dio2
						Dtwd1	Dip2a
						Dtx3	Dip2b
						Dub1	Diras2
						Dullard	Dixdc1
						Dus1l	Dkk2
						Dus2l	Dkk3
						Dus4l	Dlc1
						Dusp11	Dlg3
						Dusp14	Dlk2
						Dync1li1	Dlst
						Dync1li2	Dmxl1
						Dync2li1	Dmxl2
						Dynll1	Dna2
						E130303B06Rik	Dnaja1
						E130311K13Rik	Dnajb1
						Eapp	Dnajb4
						Ears2	Dnajc13
						Ebag9	Dnajc16
						Ebna1bp2	Dnalc1
						Ebp	Dnm3os
						Ecd	Dnmbp
						Ech1	Dnmt1
						Echdc3	Dnmt3a
						Ecsit	Dock1
						Edem1	Dock5
						Edem2	Dock7
						Edf1	Dock8
						Edn1	Dock9
						Eed	Dok1
						Eef1e1	Dolk
						Eef2k	Dopey1
						Efha2	Dpp3
						Efna1	Dpt
						Eid2	Dpy19l1
						Eif1	Dpy19l3
						Eif1a	Dpy19l4
						Eif1ad	Dpysl2
						Eif1b	Dram1
						Eif2ak3	Dscc1
						Eif2b3	Dse
						Eif2s1	Dsel
						Eif2s2	Dstn
						Eif3d	Dtl
						Eif3g	Dtx3l
						Eif3j	Dusp1
						Eif4ebp1	Dusp10
						Eif6	Dusp18
						Elavl2	Dusp3
						Elk1	Dusp4
						Ell	Dusp6
						Elp4	Dusp7
						Emd	Dusp9
						Emp2	Dync1h1
						Emx2	Dynll2
						Emx2os	Dynlt1
						Enox1	Dyrk1a
						Epb4.1l4a	Dyrk2
						Epdr1	Dysf
						Ercc6	Dzip1l
						Erich1	Dzip3
						Erlin1	E130112L23Rik
						Ern1	E130120F12Rik
						Ero1l	E2f1
						Ero1lb	E2f2
						Erp29	E2f3
						Erp44	E2f7
						Esyt1	E2f8
						Etfb	E330016A19Rik
						Ets2	E330021D16Rik
						Evi5l	Ece1
						Exoc6	Echdc1
						Exosc1	Edc3
						Exosc3	Edc4
						Exosc5	Ednra
						Ezr	Eef1a1
						F3	Efhd2
						F8a	Efna5
						Fads3	Efnb2
						Faim	Eftud2
						Fam100a	EG240055
						Fam100b	Egfl6
						Fam110b	Egfr
						Fam110c	Egln2
						Fam116b	Egln3
						Fam122a	Egr1
						Fam125a	Egr2
						Fam128b	Ehd2
						Fam134b	Ehd3
						Fam135a	Ehd4
						Fam13b	Ehmt2
						Fam154b	Eid3
						Fam164a	Eif2a
						Fam171b	Eif2ak2
						Fam173a	Eif2ak4
						Fam175a	Eif2b5
						Fam18b	Eif2c1
						Fam36a	Eif2c2
						Fam3a	Eif2s3x
						Fam50a	Eif3b
						Fam54b	Eif3l
						Fam59a	Eif4a2
						Fam65b	Eif4e
						Fam72a	Eif4ebp2
						Fam82a2	Eif4g1
						Fam96a	Eif5a2
						Fam96b	Elk3
						Farp1	Elk4
						Fars2	Ell2
						Farsa	Elmo2
						Fastk	Elovl5
						Fau	Elovl6
						Fbrs	Eme1
						Fbxl12	Emilin2
						Fbxl2	Eml1
						Fbxl20	Eml4
						Fbxl6	Eml5
						Fbxl7	Emp1
						Fbxo17	Emp3
						Fbxo31	Enc1
						Fbxo36	Endod1
						Fbxo42	Enpp1
						Fbxo6	Enpp4
						Fbxo8	Enpp5
						Fbxo9	Ep300
						Fbxw5	Epas1
						Fbxw9	Epb4.1l3
						Fchsd2	Epb4.1l5
						Fdx1	Epha4
						Fdx1l	Ephb2
						Fdxr	Ephb3
						Fgfbp3	Ephb4
						Fggy	Ephx2
						Fibin	Ephx3
						Fibp	Epm2aip1
						Ficd	Eps15
						Fip1l1	Erap1
						Fkbp11	Erbb2
						Fkbp1b	Erbb2ip
						Fkbp2	Erc1
						Fkbp3	Erc2
						Fkbp7	Ercc6l
						Flad1	Ereg
						Flot1	Ergic2
						Fmc1	Erlin2
						Fndc3b	Ermp1
						Fntb	Errfi1
						Foxj3	Espl1
						Foxn3	Esr2
						Foxp1	Esyt2
						Foxp4	Etaa1
						Fpgs	Etnk1
						Fst	Ets1
						Fth1	Etv1
						Ftl1	Etv4
						Ftsj1	Evc
						Fxr2	Evi5
						Fxyd5	Exo1
						Fyn	Exoc1
						G6pc3	Exoc4
						Gabarap	Exoc8
						Gabarapl1	Exod1
						Gadd45a	Ext1
						Gadd45b	Extl3
						Gadd45gip1	Eya1
						Gal3st4	Ezh2
						Gapdh	F2r
						Gar1	F730047E07Rik
						Gars	Fabp4
						Gas5	Fads1
						Gas8	Fads2
						Gata3	Fam102a
						Gata4	Fam102b
						Gatc	Fam110a
						Gbas	Fam111a
						Gcc1	Fam115a
						Gclm	Fam115c
						Gdnf	Fam116a
						Gem	Fam120a
						Gemin8	Fam122b
						Gfer	Fam123b
						Gfpt1	Fam126b
						Gfpt2	Fam129b
						Gga1	Fam131b
						Ggct	Fam132b
						Ggcx	Fam134c
						Ghitm	Fam13a
						Gimap1	Fam148c
						Gipc1	Fam149a
						Git1	Fam160a1
						Glce	Fam168a
						Glis1	Fam171a1
						Glrb	Fam171a2
						Glrx2	Fam179b
						Glrx5	Fam18a
						Glt8d4	Fam20b
						Gltscr2	Fam26e
						Gm10070	Fam46a
						Gm10653	Fam49b
						Gm114	Fam54a
						Gm11818	Fam55c
						Gm129	Fam57a
						Gm15427	Fam5c
						Gm16378	Fam69a
						Gm166	Fam83a
						Gm1673	Fanca
						Gm1943	Fancb
						Gm561	Fancc
						Gm5622	Fancd2
						Gm6251	Fanci
						Gm6578	Fancm
						Gm6900	Farp2
						Gm8580	Fasn
						Gm9104	Fastkd5
						Gmds	Fat1
						Gnas	Fat4
						Gnb1l	Fbf1
						Gnb5	Fblim1
						Gng2	Fbln2
						Gng5	Fbln5
						Gng8	Fbn1
						Gnl2	Fbxl19
						Gnpda1	Fbxl3
						Gnpda2	Fbxo11
						Gnpnat1	Fbxo21
						Gnptg	Fbxo28
						Golga4	Fbxo30
						Golga5	Fbxo45
						Golim4	Fbxw11
						Golph3l	Fbxw7
						Gopc	Fcf1
						Gorasp2	Fdft1
						Gosr2	Fem1a
						Got1	Fem1b
						Gp1bb	Fen1
						Gpatch4	Fermt2
						Gpc4	Fgd4
						Gpnmb	Fgf7
						Gpr108	Fgfr1
						Gpr137b	Fgfr1op
						Gpr155	Fgfr2
						Gpr176	Fgfrl1
						Gpr85	Fgl2
						Gps2	Fhdc1
						Gpt2	Fhl1
						Gpx1	Fhod1
						Gpx4	Fignl1
						Grasp	Fkbp5
						Grcc10	Fkbp9
						Grem1	Fktn
						Grina	Fli1
						Gripap1	Flna
						Grpel1	Flnb
						Gsk3b	Flot2
						Gstm2	Flrt2
						Gstm4	Flt1
						Gsto1	Flywch1
						Gstz1	Fmn1
						Gtf2f1	Fmnl3
						Gtf2f2	Fmod
						Gtf2h2	Fnbp1
						Gtf3a	Fnip2
						Gtlf3a	Fnta
						Gtpbp2	Fos
						Gtpbp8	Foxc1
						Gtrgeo22	Foxc2
						Gypc	Foxf2
						Gys1	Foxm1
						H13	Foxo1
						H1f0	Foxo4
						H2-D1	Fpgt
						H2-gs10	Freq
						H2-Ke2	Frk
						H2-M3	Frmd4a
						H2afj	Frmd8
						H2afx	Frrs1
						H3f3a	Frs2
						H47	Fry
						Hagh	Fryl
						Hapln4	Fscn1
						Hax1	Fstl1
						Hcfc1r1	Fto
						Hcn1	Fundc2
						Hdac11	Furin
						Hdac4	Fut10
						Hdac8	Fyb
						Hddc3	Fyco1
						Hdgfrp2	Fzd3
						Hdhd2	Fzd8
						Hebp1	G2e3
						Hectd2	G3bp2
						Herpud1	G6pdx
						Herpud2	Gab1
						Hexa	Gabpb2
						Hexb	Gadd45g
						Hgf	Galc
						Hgs	Galnt1
						Higd2a	Galnt10
						Hint1	Galnt12
						Hint3	Galnt2
						Hisppd2a	Galnt4
						Hist2h2be	Galnt7
						Hist3h2a	Galntl4
						Hmbs	Garnl4
						Hmg20b	Gas1
						Hmgcl	Gas2l3
						Hmox1	Gas6
						Hnrnpa0	Gas7
						Hnrnpd	Gatad2a
						Hnrnph3	Gatad2b
						Hook2	Gatsl2
						Hoxa1	Gbe1
						Hoxd8	Gcc2
						Hoxd9	Gcn1l1
						Hs1bp3	Gcnt2
						Hs6st1	Gcnt3
						Hscb	Gcsh
						Hsf1	Gdf11
						Hsp90b1	Gdi2
						Hspa5	Gemin4
						Hspa9	Gen1
						Hspb11	Gfm1
						Hspb6	Gfod1
						Hspbap1	Gfra1
						Hspe1	Ggta1
						Htra1	Gins1
						Htra2	Gins2
						Hyou1	Gins3
						Iah1	Gjb3
						Ibtk	Gjb4
						Ick	Gjc1
						Ict1	Gla
						Id2	Glb1
						Id3	Glb1l
						Ier2	Glg1
						Ier3	Gli3
						Ifi27l1	Glis3
						Ifi35	Glrx
						Ifit1	Glrx3
						Ifnar1	Glt25d1
						Ifngr1	Glt8d3
						Ifrd1	Glud1
						Ifrd2	Glul
						Ift20	Gm10416
						Ift57	Gm12824
						Igfbp6	Gm13157
						Ighmbp2	Gm13242
						Ik	Gm14137
						Il15ra	Gm2a
						Il17d	Gm4455
						Il17rc	Gm5615
						Ilkap	Gm5934
						Immp1l	Gm608
						Imp3	Gm9199
						Impdh1	Gmcl1
						Inadl	Gmnn
						Ing2	Gna14
						Ing3	Gnao1
						Ino80e	Gnaq
						Inpp5b	Gnb4
						Insl6	Gng3
						Ints12	Gnpat
						Ints6	Gnptab
						Invs	Golm1
						Ip6k2	Gpam
						Iqcc	Gpc1
						Iqck	Gpc6
						Irak1	Gpd2
						Irak1bp1	Gpld1
						Irf2	Gpr125
						Irf5	Gpr126
						Irx1	Gpr153
						Irx2	Gpr157
						Irx3	Gpr161
						Irx5	Gpr35
						Iscu	Gpr39
						Isg15	Gprc5a
						Isg20	Gprc5b
						Isoc1	Gpsm2
						Isyna1	Gramd4
						Itfg2	Grem2
						Itga11	Gria1
						Itgb3bp	Gria3
						Itm2c	Grik2
						Itpk1	Grin2b
						Jag1	Grit
						Jak2	Grk5
						Jdp2	Grk6
						Jhdm1d	Grlf1
						Jmy	Gsg1l
						Jtb	Gsn
						Jub	Gsr
						Jund	Gtf2a1
						Kank1	Gtf3c1
						Katna1	Gtf3c2
						Katnal1	Gtf3c4
						Kcmf1	Gucy1a2
						Kcnma1	Gulp1
						Kctd13	Gusb
						Kctd14	Gzf1
						Kctd15	H2-T24
						Kctd5	H6pd
						Kdelc1	Hadhb
						Kdelr1	Has2
						Kdelr2	Haus6
						Kdm4b	Havcr2
						Kif3a	Hbb-bh1
						Kif7	Hbegf
						Kin	Hcfc1
						Klc1	Hdac3
						Klc2	Hdac6
						Klf11	Hdac9
						Klf2	Hdx
						Klf4	Heatr1
						Klf9	Heatr3
						Klhdc1	Heatr5a
						Krcc1	Heatr5b
						Kri1	Hectd1
						Krit1	Heg1
						Krr1	Helb
						Krtcap2	Helz
						Krtcap3	Herc2
						Kti12	Herc4
						l7Rn6	Hes1
						Lactb2	Hgsnat
						Lamb2	Hiat1
						Lancl1	Hif1a
						Larp2	Hif1an
						Lass2	Hip1
						Ldlrad3	Hip1r
						Lemd2	Hipk1
						Leng1	Hipk2
						Leo1	Hipk3
						Lepre1	Hist1h1b
						Leprotl1	Hist1h1e
						Lgals3	Hist1h2ak
						Lgals8	Hist1h2bg
						Lias	Hist1h3f
						Lin37	Hist1h4i
						Lin52	Hivep3
						Lins2	Hk1
						Lipa	Hmga2
						Llph	Hmgb3
						Lman1	Hmgcr
						Lman2	Hn1
						Lman2l	Hnrnpu
						Lmbr1l	Hoxa2
						Lmbrd1	Hoxa3
						Lmo4	Hoxa5
						Lnp	Hpcal1
						LOC106740	Hs2st1
						Loh12cr1	Hsd17b7
						Lonp1	Hsdl1
						Lonrf1	Hsp90aa1
						Lpar4	Hspa12a
						Lpcat4	Hspa1b
						Lpl	Hspa4l
						Lrrc27	Hspa8
						Lrrc45	Hspb8
						Lrrfip2	Hspg2
						Lrsam1	Hsph1
						Lsm1	Htr2a
						Lsm10	Htt
						Lsm12	Hus1
						Lsm14a	Huwe1
						Lsm5	Hyal2
						Ltv1	Iars2
						Luc7l	Icmt
						Luc7l2	Id1
						Ly96	Id4
						Lyplal1	Idh1
						Lyrm2	Idi1
						Lyrm4	Ids
						Lyrm5	Ier5l
						Lysmd2	Iffo2
						Lzic	Ifi203
						Macrod1	Ifi204
						Macrod2	Ifi30
						Maf1	Ifit2
						Mafg	Ifngr2
						Mafk	Ift140
						Maged2	Ift80
						Magi2	Igf1r
						Magmas	Igf2
						Magohb	Igf2r
						Magt1	Igsf10
						Mamdc2	Igsf3
						Man1b1	Ikbkap
						Manbal	Ikzf2
						Manea	Il13ra1
						Manf	Il15
						Map1lc3a	Il17rd
						Map2k1	Il1f9
						Map2k2	Il1r1
						Map2k5	Il1rl1
						Map3k3	Il1rl2
						Mapk1ip1	Il34
						Mapkapk5	Il4ra
						Mapksp1	Il6ra
						Mapre3	Impact
						2014-03-05	Impad1
						Marcks	Ing5
						Mark2	Inhba
						Mark3	Ino80c
						Max	Inpp4a
						Maz	Inppl1
						Mbd2	Insig1
						Mbd6	Ints1
						Mbnl2	Ints2
						Mcart1	Ints7
						Mcc	Ints9
						Mccc1	Ipo11
						Mcfd2	Ipo5
						Mdfic	Ipo7
						Mdp1	Ipo8
						Mea1	Ipo9
						Meaf6	Iqgap1
						Med10	Iqgap3
						Med19	Iqsec1
						Med20	Ireb2
						Med25	Irgm1
						Med26	Irgq
						Med27	Irs1
						Med30	Ism1
						Med31	Itga3
						Med8	Itga5
						Med9	Itga6
						Meg3	Itga8
						Meis1	Itgav
						Meis2	Itgb1
						Mesdc2	Itgb2
						Metapl1	Itgb8
						Metrn	Itgbl1
						Mettl1	Itih5l
						Mettl10	Itpr1
						Mettl11a	Itpr3
						Mettl14	Itpripl1
						Mettl2	Jarid2
						Mettl3	Jmjd1c
						Mettl5	Jun
						Mettl9	Jup
						Mex3b	Kank2
						Mfap1a	Kank3
						Mfap1b	Kat2b
						Mfsd10	Katnb1
						Mfsd11	Kbtbd11
						Mfsd2	Kbtbd2
						Mgat2	Kbtbd4
						Mgat4b	Kbtbd7
						Mgmt	Kbtbd8
						Mgst2	Kcna4
						Mib2	Kcnab1
						Mid1	Kcnj15
						Mid1ip1	Kcnk2
						Miip	Kcnn4
						Mis12	Kcnq1ot1
						Mitd1	Kctd17
						Mknk1	Kctd7
						Mkrn1	Kctd9
						Mllt11	Kdm1
						Mmaa	Kdm2b
						Mmachc	Kdm5a
						Mmp11	Kdm5d
						Mmp19	Keap1
						Mmp9	Kif11
						Mnat1	Kif13a
						Mnd1	Kif14
						Mobkl1a	Kif15
						Mobkl3	Kif18a
						Mogs	Kif18b
						Morc2a	Kif1b
						Morf4l1	Kif1c
						Morf4l2	Kif20a
						Morn4	Kif23
						Mpg	Kif24
						Mphosph10	Kif26b
						Mphosph6	Kif2a
						Mpv17l2	Kif2c
						Mras	Kif3b
						Mreg	Kif4
						Mri1	Kifap3
						Mrp63	Kirrel
						Mrpl12	Klf13
						Mrpl15	Klhdc5
						Mrpl2	Klhdc8a
						Mrpl20	Klhl11
						Mrpl21	Klhl12
						Mrpl22	Klhl18
						Mrpl23	Klhl23
						Mrpl24	Klhl24
						Mrpl27	Klhl25
						Mrpl32	Klhl28
						Mrpl37	Klhl9
						Mrpl4	Klk10
						Mrpl44	Kntc1
						Mrpl46	Kpna1
						Mrpl52	Kpna2
						Mrpl54	Kpna3
						Mrpl9	Kpna4
						Mrps10	Kpna6
						Mrps12	Kpnb1
						Mrps14	Kremen1
						Mrps16	Ksr1
						Mrps18a	L3mbtl2
						Mrps18b	L3mbtl3
						Mrps2	Lama2
						Mrps22	Lama4
						Mrps23	Lamc2
						Mrps26	Lamp2
						Mrps28	Lancl2
						Mrps31	Lancl3
						Mrps34	Large
						Mrps35	Larp5
						Mrps5	Lars2
						Mrps9	Lasp1
						Msi2	Lass4
						Mt2	Lass6
						Mta1	Layn
						Mta3	Lbr
						Mtap2	Ldha
						Mtap6	Ldlr
						Mtbp	Leprot
						Mterfd1	Lfng
						Mtg1	Lgals9
						Mthfd2	Lgr4
						Mthfr	Lgr6
						Mtm1	Lhfp
						Mtmr14	Lhfpl4
						Mtpap	Lhx6
						Mtrf1l	Lifr
						Mtrr	Lig1
						Mtss1l	Lig3
						Mtvr2	Lima1
						Murc	Limd1
						Mus81	Lims1
						Mvp	Lin28b
						Mxd1	Lin54
						Myc	Lin7c
						Myd116	Lipg
						Myd88	Llgl1
						Myg1	Lmcd1
						Myo6	Lmln
						Myst1	Lmna
						Myst4	Lmnb1
						N4bp2	Lmo7
						N6amt1	Lmtk2
						Naaa	Loxl1
						Nae1	Loxl3
						Naf1	Lpar1
						Nagk	Lpar6
						Nans	Lpcat1
						Napa	Lpcat3
						Napb	Lpgat1
						Napg	Lphn1
						Nars	Lphn3
						Nars2	Lpin1
						Nbas	Lpin2
						Ncoa4	Lrba
						Ndel1	Lrch1
						Ndfip1	Lrig1
						Ndfip2	Lrp1
						Ndnl2	Lrp10
						Ndufa1	Lrp11
						Ndufa11	Lrp4
						Ndufa6	Lrp5
						Ndufa7	Lrp6
						Ndufa8	Lrp8
						Ndufab1	Lrpprc
						Ndufaf2	Lrrc58
						Ndufaf4	Lrrc8b
						Ndufb11	Lrrc8c
						Ndufb4	Lrrc8e
						Ndufb6	Lrrk2
						Ndufb9	Lsm11
						Ndufc1	Lsm14b
						Ndufc2	Lsm6
						Ndufs6	Lss
						Ndufv3	Ltbp1
						Neat1	Ltbp2
						Neb	Ltbp3
						Necap1	Lum
						Necap2	Luzp1
						Nek1	Ly6a
						Nfe2l1	Ly6e
						Nfe2l2	Ly75
						Nfil3	Mab21l1
						Nfkb2	Macf1
						Nfkbib	Maff
						Nfkbil1	Magee1
						Nfu1	Magi3
						Nfxl1	Magoh
						Ngdn	Mak10
						Ngf	Malat1
						Ngrn	Malt1
						Nhlrc2	Maml3
						Nhlrc3	Man2a1
						Nip7	Man2a2
						Nkiras2	Map2k3
						Nktr	Map2k4
						Nle1	Map2k6
						Nmd3	Map3k1
						Nme2	Map3k12
						Nme6	Map3k4
						Nmi	Map3k6
						Nmnat3	Map3k7
						Nmt1	Map3k7ip3
						Nnmt	Map4k4
						Nob1	Mapk1
						Nol12	Mapk11
						Nol4	Mapk14
						Nol7	Mapkapk2
						Nop14	Mapkapk3
						Nop16	Mapkbp1
						Nop2	Mapre2
						Nop56	2014-03-04
						Nop58	Marcksl1
						Nosip	Mars
						Nov	Masp1
						Npas3	Mast2
						Npdc1	Mastl
						Nr2c2ap	Matn2
						Nr4a2	Matr3
						Nrbf2	Mbd5
						Nrbp2	Mblac2
						Nrg1	Mbnl1
						Nrgn	Mbnl3
						Nsfl1c	Mboat1
						Nsmce2	Mbtps1
						Nsun5	Mcm10
						Nt5c	Mcm3
						Nt5dc1	Mcm3ap
						Nucb1	Mcm4
						Nucb2	Mcm5
						Nudc	Mcm6
						Nudt17	Mcm7
						Nudt18	Mdc1
						Nudt21	Mecom
						Nudt22	Med1
						Nudt8	Med13
						Nudt9	Med13l
						Nupr1	Med14
						Nus1	Med16
						Oat	Med18
						Obfc2a	Med23
						Obfc2b	Med24
						Ocel1	Mef2c
						Ociad1	Megf10
						Odf2	Megf8
						Odz4	Megf9
						Ogfod2	Melk
						Ogg1	Mertk
						Optn	Met
						Orc4l	Metap1
						Orc5l	Mfap3
						ORF19	Mfap3l
						Ormdl2	Mfap5
						Ormdl3	Mfn2
						Os9	Mfsd4
						Osbp	Mga
						Osbpl2	Mgat1
						Osgep	Mgat3
						Osr1	Mgat5
						Ostc	Mgp
						Ostf1	Mgst1
						Otub2	Mib1
						Otud5	Mical2
						Oxnad1	Mical3
						Oxr1	Micall1
						P2rx3	Midn
						P4hb	Mier1
						Pacsin2	Mier3
						Pafah1b3	Mif4gd
						Paip2	Mipep
						Pak1ip1	Mki67
						Pak4	Mkl2
						Papd4	Mkln1
						Pappa	Mknk2
						Papss1	Mkx
						Papss2	Mll1
						Pard6a	Mll3
						Park7	Mllt4
						Parl	Mllt6
						Parp2	Mmd
						Parp6	Mmgt2
						Pawr	Mmp14
						Pcbd2	Mmp2
						Pcbp3	Mms19
						Pcgf1	Mn1
						Pcgf2	Mobkl1b
						Pcgf6	Mobkl2a
						Pck2	Mospd2
						Pcmtd2	Mov10
						Pctk2	Mpdz
						Pctk3	Mphosph9
						Pdap1	Mpp1
						Pdcd2	Mpp5
						Pdcd2l	Mpp7
						Pdcd4	Mprip
						Pdcl	Mpv17
						Pdcl3	Mr1
						Pde4dip	Mrc2
						Pde6d	Mrgprf
						Pdgfc	Mrpl18
						Pdhb	Mrpl49
						Pdia3	Msh2
						Pdia4	Msh3
						Pdia5	Msh6
						Pdia6	Msl1
						Pdk4	Msl3l2
						Pdrg1	Msrb3
						Pdzd11	Mtap1a
						Pecr	Mtch1
						Pelo	Mterfd2
						Per1	Mtf2
						Pex11b	Mthfd1
						Pex14	Mtmr1
						Pex16	Mtmr10
						Pfdn2	Mtmr11
						Pgm3	Mtmr12
						Pgrmc1	Mtmr4
						Pgrmc2	Mtor
						Phactr2	Mtpn
						Phax	Mum1
						Phb2	Mum1l1
						Phf10	Mustn1
						Phf8	Mvk
						Phgdh	Myadm
						Phkg2	Mybl1
						Phpt1	Mybl2
						Phyh	Mycbp2
						Pi4k2a	Myh10
						Pibf1	Myh9
						Pick1	Myl6
						Piga	Mylip
						Pigf	Mylk
						Pigh	Myo10
						Pigp	Myo18a
						Pigy	Myo1d
						Pigyl	Myo1e
						Pim3	Myo5a
						Pin1	Myo9a
						Pin4	Myo9b
						Pink1	Myof
						Pir	Mysm1
						Pisd	Nab1
						Pja2	Nab2
						Pkp2	Nacc1
						Pla2g12a	Nacc2
						Plag1	Nanos1
						Plagl1	Napepld
						Plcxd2	Nasp
						Pld3	Nat2
						Plekha1	Nav1
						Plekha3	Nav2
						Plekha4	Nav3
						Plekha5	Nbeal1
						Plekhb2	Ncam1
						Plekhj1	Ncan
						Plk2	Ncapd3
						Plk3	Ncapg
						Plscr2	Ncapg2
						Plscr3	Ncaph
						Plxna3	Nck2
						Pmf1	Nckap1
						Pmm1	Ncoa6
						Pmm2	Ncor1
						Pnkd	Ndrg3
						Pnma1	Ndst1
						Pnn	Ndufa9
						Pnpla2	Ndufaf1
						Pnpt1	Nedd1
						Pnrc1	Nedd4
						Pnrc2	Nedd9
						Pofut2	Negr1
						Polb	Neil3
						Pold2	Nek2
						Pold4	Nek7
						Pole4	Nek9
						Poli	Nelf
						Polr1e	Nes
						Polr2c	Net1
						Polr2f	Neurl3
						Polr2i	Nf1
						Polr3d	Nfat5
						Polr3e	Nfatc1
						Polr3gl	Nfatc3
						Polr3h	Nfatc4
						Pon3	Nfib
						Pop4	Nfkbil2
						Ppan	Nfya
						Ppapdc1b	Ngef
						Ppapdc2	Nicn1
						Ppef1	Nid1
						Ppib	Nid2
						Ppie	Nipa2
						Ppig	Nipal1
						Ppm1a	Nipbl
						Ppox	Nisch
						Ppp1r11	Nkain1
						Ppp1r12c	Nlgn2
						Ppp1r14b	Nlk
						Ppp1r15b	Nlrc4
						Ppp1r2	Nmt2
						Ppp1r3b	Nnt
						Ppp1r8	Nod1
						Ppp2r3c	Nol11
						Ppp3ca	Nop10
						Ppp3cc	Notch1
						Pppde2	Notch2
						Pqbp1	Npat
						Praf2	Npepps
						Prdm5	Npnt
						Prdx5	Npr2
						Preb	Npr3
						Prep	Nptn
						Prkcdbp	Nqo1
						Prkcsh	Nqo2
						Prkrip1	Nr1d1
						Prmt3	Nr1d2
						Procr	Nr1h5
						Prosc	Nr2f1
						Prpf38b	Nr3c1
						Prpf40b	Nr3c2
						Prpsap2	Nr4a1
						Prr14	Nras
						Prrc1	Nrn1
						Prrg2	Nrp1
						Prune2	Nrp2
						Psd	Nsd1
						Psd3	Nsdhl
						Psen1	Nsg1
						Psenen	Nsl1
						Psmb10	Nsmaf
						Psmb5	Ntn1
						Psmb6	Nuak1
						Psme2	Nuak2
						Psme3	Nudcd3
						Psmf1	Nudt4
						Psmg1	Nuf2
						Psmg2	Nufip2
						Psmg3	Nup133
						Psph	Nup153
						Psrc1	Nup155
						Pstk	Nup160
						Ptgr2	Nup205
						Ptp4a1	Nup210l
						Ptp4a3	Nup214
						Ptpmt1	Nup43
						Ptpn2	Nup50
						Ptpn21	Nup62
						Ptprm	Nup85
						Ptrh1	Nup93
						Ptrh2	Nup98
						Pts	Nupl1
						Ptx3	Oaf
						Pus1	Obfc1
						Pus7	Ociad2
						Pvr	Ocrl
						Pvrl2	Odc1
						Pvt1	Ogdh
						Pxmp3	Ogdhl
						Pycr2	Ogn
						Qdpr	Ogt
						Qsox2	Olfm1
						Qtrt1	Olfml2b
						Qtrtd1	Olfr614
						R3hdm2	Onecut2
						Rab11fip1	Opa1
						Rab18	Opa3
						Rab24	Opcml
						Rab27b	Orc1l
						Rab28	Orc6l
						Rab2b	Osbpl3
						Rab30	Osbpl5
						Rab32	Ostm1
						Rab39b	Otud4
						Rab3a	Ovca2
						Rab3c	Oxct1
						Rab40c	Oxsm
						Rab4b	P4ha1
						Rab5a	P4ha3
						Rab8a	Pacs2
						Rabac1	Pafah1b1
						Rabggtb	Pak1
						Rabl4	Pak2
						Rabl5	Palb2
						Rad51l1	Palld
						Rad52	Palm2
						Rae1	Pam
						Rai12	Pan3
						Rala	Pank1
						Ralgps1	Pank2
						Ramp2	Pank3
						Rarg	Pank4
						Rars2	Paqr4
						Rasl11a	Paqr8
						Rasl11b	Pard6b
						Rassf1	Pard6g
						Rassf5	Parva
						Raver1	Pask
						Rbbp5	Patz1
						Rbm10	Paxip1
						Rbm17	Pbk
						Rbm22	Pbrm1
						Rbm38	Pbx1
						Rbm39	Pcdh17
						Rbm42	Pcdh18
						Rbm8a	Pcdh7
						Rbms2	Pcdh9
						Rbp1	Pcdhb16
						Rbpms	Pcdhb20
						Rcc2	Pcdhb22
						Rccd1	Pcdhb9
						Rce1	Pcdhgc3
						Rchy1	Pcgf3
						Rcl1	Pcm1
						Rcn3	Pcna
						Rdbp	Pcnt
						Rdh10	Pcyox1
						Recql4	Pcyt1a
						Reep4	Pcyt1b
						Reep5	Pcyt2
						Reep6	Pdcd6
						Refbp2	Pde3a
						Rela	Pde4b
						Renbp	Pde4d
						Retsat	Pde7a
						Rexo2	Pde8b
						Rfesd	Pdgfra
						Rfk	Pdgfrb
						Rfng	Pdik1l
						Rftn2	Pdk1
						Rfxap	Pdlim2
						Rg9mtd1	Pdp2
						Rg9mtd3	Pdpn
						Rgl3	Pds5b
						Rgnef	Pdxdc1
						Rgs10	Pdzd4
						Rgs19	Pdzrn3
						Rgs3	Pear1
						Rhbdd1	Peg10
						Rheb	Peg12
						Rhoc	Peg3
						Rhoj	Pex5
						Rhoq	Pfas
						Ric8	Pfkfb1
						Rilpl1	Pfkl
						Rin1	Pfkm
						Riok1	Pfn2
						Riok2	Pftk1
						Rit1	Pgam1
						Rmnd1	Pgd
						Rmnd5a	Pgk1
						Rnaseh1	Pgm2l1
						Rnasek	Pgp
						Rnaset2b	Phb
						Rnd1	Phc3
						Rnf11	Phf13
						Rnf113a1	Phf15
						Rnf113a2	Phf17
						Rnf114	Phf19
						Rnf126	Phip
						Rnf130	Phka1
						Rnf149	Phka2
						Rnf181	Phldb2
						Rnf2	Phlpp1
						Rnf214	Phlpp2
						Rnf215	Phtf1
						Rnf220	Phtf2
						Rnf41	Pi15
						Rnf5	Pi4ka
						Rnpc3	Pi4kb
						Robld3	Pias1
						Rora	Pias2
						rp9	Pigc
						Rpa3	Pign
						Rpain	Pik3c2a
						Rpia	Pik3ca
						Rpl10	Pik3cb
						Rpl10a	Pik3r1
						Rpl11	Pik3r3
						Rpl12	Pik3r4
						Rpl13	Pik3r5
						Rpl13a	Pikfyve
						Rpl14	Pip4k2a
						Rpl18	Pip4k2b
						Rpl19	Pip5k1c
						Rpl21	Pitrm1
						Rpl23	Pkd1
						Rpl28	Pkia
						Rpl29	Pkm2
						Rpl32	Pkp4
						Rpl34	Pla2g15
						Rpl35	Pla2g4a
						Rpl36	Pla2g4c
						Rpl36a	Plat
						Rpl6	Plau
						Rpl8	Plcg1
						Rpn1	Plec1
						Rpn2	Plekha2
						Rpp14	Plekha8
						Rpp21	Plekhg2
						Rpp38	Plekhg3
						Rpp40	Plekhh2
						Rps11	Plk4
						Rps12	Pls3
						Rps17	Plxna2
						Rps18	Plxna4
						Rps19	Plxnb2
						Rps19bp1	Plxnd1
						Rps2	Pmepa1
						Rps20	Pml
						Rps26	Pmp22
						Rps27	Pms1
						Rps29	Pmvk
						Rps3	Pnp1
						Rps6ka2	Pnpla6
						Rps8	Pola1
						Rps9	Pola2
						Rpsa	Pold3
						Rpusd4	Poldip3
						Rras	Pole
						Rrbp1	Pole2
						Rrp15	Polg
						Rrp1b	Polh
						Rrp9	Polm
						Rrs1	Polq
						Rsad1	Polr1a
						Rsbn1	Polr1b
						Rshl2a	Polr2a
						Rshl2b	Polr2b
						Rsl1d1	Polr3b
						Rsrc2	Polr3f
						Rusc2	Polr3g
						Ruvbl2	Por
						Rwdd3	Postn
						Rwdd4a	Ppap2b
						Rxrb	Ppfibp2
						Sac3d1	Ppih
						Safb	Ppm1f
						Samd4	Ppm1g
						Sar1b	Ppm1k
						Sars	Ppm2c
						Sart1	Ppp1cb
						Sash1	Ppp1r13b
						Sbds	Ppp1r16a
						Scamp3	Ppp2ca
						Scamp4	Ppp2r1a
						Scand1	Ppp2r1b
						Scly	Ppp2r3a
						Scnm1	Ppp2r4
						Scpep1	Ppp2r5c
						Sdccag10	Ppp2r5d
						Sdf2l1	Ppt1
						Sdhaf1	Pramef8
						Sdhb	Prc1
						Sec11a	Prdm10
						Sec11c	Prdx1
						Sec16b	Prei4
						Sec23b	Prelp
						Sec24d	Prex2
						Sec31a	Prickle2
						Sec61a1	Prim1
						Sec61b	Prkaa1
						Sec62	Prkacb
						Sec63	Prkag2
						Secisbp2	Prkar2a
						Sel1l	Prkar2b
						Selk	Prkca
						Selm	Prkd3
						Sema3c	Prkdc
						Sema4c	Prl2c2
						2014-09-05	Prl2c3
						Sepw1	Prokr1
						Serbp1	Pros1
						Serf1	Prosapip1
						Serf2	Prpf18
						Serhl	Prpf39
						Serp1	Prpf40a
						Serpinf1	Prpf8
						Serpinh1	Prps2
						Sesn2	Prr11
						Setd6	Prr5l
						Setd8	Prrg3
						Sf3a2	Prrg4
						Sf3b4	Prrx1
						Sf4	Prss23
						Sfrs12ip1	Prtg
						Sfrs15	Psma2
						Sfrs17b	Psma4
						Sfrs5	Psma5
						Sfrs6	Psmd1
						Sft2d2	Psmd10
						Sfxn3	Psmd13
						Sfxn4	Psmd2
						Sgtb	Psmd3
						Sh2b1	Psmd5
						Sh3bp5	Psme4
						Sh3gl1	Ptcd3
						Sh3yl1	Ptdss1
						Sharpin	Ptger4
						Shb	Ptges
						Shfm1	Ptgfr
						Shmt1	Ptgfrn
						Shmt2	Ptgis
						Shox2	Ptgs1
						Siah1a	Ptgs2
						Siah2	Ptk7
						Sil1	Ptp4a2
						Sirt2	Ptpn1
						Sirt6	Ptpn11
						Slc11a2	Ptpn14
						Slc16a1	Ptpn3
						Slc1a4	Ptpn4
						Slc1a5	Ptpn9
						Slc20a1	Ptpre
						Slc22a5	Ptprf
						Slc24a3	Ptprj
						Slc25a19	Ptprk
						Slc25a28	Ptprs
						Slc25a33	Ptrf
						Slc25a37	Pum2
						Slc25a38	Purb
						Slc25a39	Pvrl1
						Slc25a40	Pxdn
						Slc30a5	Pygb
						Slc30a7	Qser1
						Slc33a1	Rab1b
						Slc35b1	Rab27a
						Slc38a1	Rab31
						Slc38a7	Rab3d
						Slc39a11	Rab9
						Slc39a7	Racgap1
						Slc3a2	Rad18
						Slc43a2	Rad50
						Slc46a1	Rad54b
						Slc6a9	Rad54l
						Slc7a1	Rad54l2
						Slc7a11	Rai14
						Slc7a2	Ralgds
						Slc7a5	Ramp3
						Slc7a6os	Ranbp2
						Slpi	Ranbp6
						Sltm	Rangap1
						Slu7	Rap1a
						Smap1	Rap1b
						Smarcb1	Rap2a
						Smarcd3	Rapgef1
						Smarce1	Rapgef6
						Smg6	Rara
						Smn1	Rarb
						Smndc1	Rasa2
						Smox	Rasa3
						Smurf1	Rasa4
						Smyd3	Rasal2
						Snai2	Rasgrp3
						Snap47	Rassf2
						Snapc3	Rassf3
						Snapc5	Rassf6
						Snapin	Rbbp7
						Snd1	Rbl1
						Snf8	Rbl2
						Snhg1	Rbm12
						Snhg6	Rbm27
						Snhg7	Rbm41
						Snord22	Rbm47
						Snrnp35	Rbmx
						Snrnp48	Rc3h1
						Snrnp70	Rc3h2
						Snrpa	Rcan2
						Snrpb	Rcan3
						Snrpc	Rcbtb1
						Snrpf	Rcor1
						Snupn	Rdh11
						Snx1	Rdh13
						Snx12	Rdh14
						Snx21	Rdx
						Snx24	Reck
						Snx26	Recql
						Soat2	Rev3l
						Sorbs1	Rfc1
						Sox12	Rfc3
						Sox4	Rfc5
						Sp2	Rfwd3
						Spag7	Rfx3
						Spata2	Rfx7
						Spcs1	Rgl1
						Spcs2	Rgma
						Spg20	Rgmb
						Sphk2	Rgs16
						Spire2	Rgs9bp
						Spsb2	Rhbdf1
						Spty2d1	Rhobtb2
						Sqrdl	Rhobtb3
						Sqstm1	Rhou
						Srebf1	Rian
						Srfbp1	Rictor
						Srgap1	Rif1
						Srgap3	Rin2
						Srm	Ripk1
						Srp14	Rlf
						Srp19	Rnase4
						Srp68	Rnaseh2c
						Srp9	Rnf111
						Srpr	Rnf141
						Srprb	Rnf145
						Srr	Rnf150
						Srrd	Rnf152
						Ssb	Rnf160
						Ssbp1	Rnf168
						Ssbp2	Rnf19b
[truncated: 663 more rows]
