# Supplementary material for: Distinct transcriptional responses elicited by unfolded nuclear or cytoplasmic protein in mammalian cells
Source: eLife. 2015 Aug 28;4:e07687. doi: 10.7554/eLife.07687 (PMC4566031; doi:10.7554/eLife.07687)
Supplement: Supplementary file 2. — mRNA-seq data from all three perturbations. DOI: http://dx.doi.org/10.7554/eLife.07687.018 [file elife07687s002.xlsx]

## Sheet: Summary
mRNA-seq data from all three perturbations.
Transcript changes are represented as log2 fold-changes relative to unperturbed samples. Genes having at least 1 sequence read in every samples were included.
The original data (including fastq files) are available at Gene Expression Omnibus (GEO) database under accession no. GSE65504 and GSE65636.
DD = unfolded DD, HS = heat shock (42 ˚C), Tu = tunicamycin (5 mM).
gene = annotated genes
45, 135, or 405 = treatment time in minutes
logFC = log2 fold change.
PValue = p-value calculated using edgeR
FDR = false discovery rate calculated using edgeR

## Sheet: mRNA-seq Data
gene	DD45logFC	DD45PValue	DD45FDR	DD135logFC	DD135PValue	DD135FDR	DD405logFC	DD405PValue	DD405FDR	HS45logFC	HS45PValue	HS45FDR	HS135logFC	HS135PValue	HS135FDR	Tu45logFC	Tu45PValue	Tu45FDR	Tu135logFC	Tu135PValue	Tu135FDR	Tu405logFC	Tu405PValue	Tu405FDR
0610007C21Rik	0.281985	0.434884	0.955693	-0.318583	0.383039	0.960134	0.0162486	0.951363	0.972073	-0.553916	0.156201	0.375092	-0.322367	0.356313	0.570787	0.091869	0.684846	0.857019	-0.44365	0.134811	0.445797	0.65218	0.0010433	0.00310904
0610007L01Rik	-0.00468107	1	1	0.249117	0.31044	0.955127	0.367565	0.138674	0.286595	0.254166	0.447832	0.663317	0.239798	0.449625	0.65139	-0.221621	0.296663	0.581588	0.167065	0.523415	0.797595	1.02624	4.54799e-07	3.11738e-06
0610007P08Rik	0.322442	0.480421	0.955693	-0.110419	0.83534	0.996172	-0.128531	0.762858	0.851983	-1.63906	0.00381975	0.0892767	-2.44481	5.66598e-05	0.00177819	0.350627	0.30311	0.587842	-0.665263	0.149934	0.467459	-0.659642	0.0581808	0.101316
0610007P14Rik	0.291727	0.356525	0.955693	0.113433	0.693585	0.991213	-0.255935	0.386647	0.559787	-0.4703	0.270743	0.498895	-0.092748	0.812635	0.905246	0.0155913	0.94471	0.978944	0.0470757	0.863702	0.958982	0.803249	2.2958e-05	0.000104194
0610007P22Rik	0.466807	0.391796	0.955693	0.251217	0.619577	0.986881	0.839873	0.0810472	0.204282	1.00561	0.0125022	0.144785	0.880211	0.0154421	0.0864342	0.598909	0.00726928	0.0668639	0.445573	0.127015	0.433934	1.50364	4.40283e-15	1.09304e-13
0610009B22Rik	-1.30085	0.0207463	0.955693	-1.75301	0.00163005	0.0934935	-1.25526	0.0184837	0.0812275	-1.70635	0.0157985	0.156256	-0.629398	0.245789	0.457752	-0.794701	0.00261114	0.0341536	-1.46336	1.15915e-05	0.00223867	-0.398434	0.0828133	0.13627
0610009D07Rik	-0.546886	0.135235	0.955693	-0.334758	0.311049	0.955127	-0.869306	0.0136137	0.0675241	-1.48692	0.0418238	0.215711	-0.587658	0.302768	0.517933	-0.424102	0.203687	0.477406	-0.979131	0.0287901	0.208206	0.451872	0.075421	0.126186
0610009O20Rik	0.206553	0.558212	0.957503	-0.164458	0.648667	0.990305	0.334473	0.266655	0.440173	0.370031	0.274812	0.503881	0.501411	0.133432	0.317512	0.309315	0.130667	0.374025	0.476575	0.061141	0.300733	0.644839	0.000598245	0.00190082
0610010F05Rik	-0.262908	0.42715	0.955693	-0.29781	0.309823	0.955127	-0.930084	0.00180489	0.0188221	-0.704407	0.201141	0.429045	-0.713369	0.196644	0.399154	0.279668	0.494749	0.743513	-0.28968	0.514194	0.793636	-0.52063	0.151939	0.225917
0610010K14Rik	0.20648	0.569095	0.958723	-0.137562	0.697868	0.991213	0.0983967	0.761607	0.851027	0.00243648	0.994541	0.998964	0.0640903	0.84422	0.922715	0.0828744	0.684921	0.857019	0.10782	0.663986	0.866687	0.615658	0.00188379	0.00523384
0610011L14Rik	0.201232	0.663395	0.967797	0.0845737	0.824131	0.996172	0.827809	0.0533013	0.157547	0.0807001	0.817118	0.905449	0.150861	0.638084	0.798407	-0.0657026	0.750431	0.892632	0.180945	0.471777	0.770017	-0.137799	0.443977	0.542947
0610012G03Rik	0.412398	0.19555	0.955693	0.0537316	0.842422	0.9965	0.0554036	0.839668	0.902416	0.16599	0.615544	0.784162	-0.251487	0.405681	0.615023	-0.323176	0.105389	0.332843	-0.510903	0.0423235	0.250511	0.126899	0.50164	0.598633
0610030E20Rik	-0.20662	0.585304	0.96034	-0.545157	0.105792	0.808932	-0.545412	0.0897643	0.217439	0.521186	0.165993	0.388237	0.397031	0.236371	0.445957	0.234325	0.296955	0.581785	0.257998	0.34171	0.663219	0.305248	0.117265	0.182234
0610031J06Rik	0.750849	0.204826	0.955693	-0.0152142	0.993847	1	1.48653	0.00422286	0.0328173	0.0135501	0.965675	0.985267	0.449922	0.117167	0.292624	-0.0820184	0.657863	0.841997	0.184856	0.425912	0.734014	0.357233	0.0374526	0.0699172
0610037L13Rik	0.316269	0.439832	0.955693	0.0713588	0.837375	0.996172	0.276534	0.445417	0.610613	-0.459988	0.207936	0.436731	-0.395474	0.212261	0.417164	0.0799753	0.689122	0.860003	-0.145793	0.555176	0.815676	0.445703	0.0113007	0.0248581
0610037P05Rik	-0.477188	0.215174	0.955693	-0.166879	0.63616	0.989904	-0.340295	0.3334	0.508378	-0.172926	0.620624	0.786918	-0.613235	0.0708381	0.215538	-0.235259	0.268064	0.55115	-0.231394	0.38628	0.700541	-0.0681208	0.720691	0.790384
0610038B21Rik	0.527761	0.352329	0.955693	-0.307786	0.742371	0.9929	0.576598	0.228867	0.39855	0.879745	0.0708716	0.261622	-0.0639678	0.927995	0.966037	0.276108	0.374024	0.652476	0.0744044	0.894146	0.969322	0.961135	0.00722152	0.0167684
0610038F07Rik	-0.578472	0.120217	0.955693	-0.469662	0.171626	0.882375	-0.848774	0.0120604	0.0632488	-0.989973	0.0323332	0.19724	-0.435109	0.231056	0.439324	-0.259445	0.221812	0.496677	-0.240968	0.331825	0.65559	-0.311908	0.0871337	0.142211
0910001L09Rik	0.528655	0.168602	0.955693	0.100012	0.769058	0.995049	0.348717	0.308528	0.483149	0.292296	0.412099	0.631371	-0.0186723	0.956485	0.980951	-0.287968	0.195217	0.468648	-0.275204	0.332633	0.655934	-0.0465673	0.807881	0.859374
1110002B05Rik	-0.585205	0.128181	0.955693	-0.364834	0.285703	0.948861	-0.902019	0.00981568	0.0553449	-0.465571	0.20955	0.438246	-0.737295	0.0299407	0.128852	-0.801649	0.000659374	0.013214	-1.03084	0.000278058	0.0164203	-0.195879	0.360102	0.459333
1110003E01Rik	-0.267667	0.506507	0.955693	-0.440737	0.244845	0.93973	-0.569193	0.10376	0.237614	0.796155	0.0381959	0.208531	0.78652	0.0330946	0.138079	0.142012	0.518338	0.759956	0.230295	0.426558	0.734525	1.72135	1.92574e-17	6.322e-16
1110004E09Rik	0.153863	0.635144	0.962838	0.294869	0.31459	0.955127	-0.315928	0.282352	0.456483	0.509943	0.202571	0.430048	0.715681	0.0620881	0.199669	0.163808	0.543638	0.775681	0.0705264	0.823766	0.942364	0.659121	0.00802688	0.018417
1110004F10Rik	0.153541	0.616874	0.962615	0.169578	0.550962	0.980133	-0.0915628	0.761195	0.850887	-0.377972	0.226296	0.455467	-0.420831	0.149031	0.337569	-0.240466	0.205301	0.478935	-0.332496	0.154619	0.474945	0.131321	0.445399	0.544141
1110005A03Rik	0.18981	0.674803	0.967962	-0.229607	0.618833	0.986881	-0.00547649	0.992126	0.997524	0.14146	0.772402	0.881088	0.502644	0.206223	0.408842	-0.270051	0.374202	0.652476	-0.316957	0.380417	0.696317	0.202445	0.408036	0.507123
1110006O24Rik	-0.484684	0.425035	0.955693	-0.968603	0.149697	0.857166	0.116555	0.901027	0.940456	0.707109	0.156462	0.375262	0.968417	0.022563	0.109177	0.543108	0.0860521	0.298091	0.534873	0.149491	0.46703	0.290171	0.30827	0.405074
1110007A13Rik	-0.209904	0.485782	0.955693	-0.120262	0.656383	0.990689	-0.70707	0.0073144	0.0456768	-0.412588	0.21694	0.447026	-0.481773	0.113271	0.286478	-0.253862	0.184745	0.455205	-0.0909897	0.699318	0.886022	-0.647902	0.000550124	0.00176649
1110007C09Rik	0.455306	0.269473	0.955693	-0.262718	0.553676	0.980133	0.742995	0.029252	0.107924	0.572868	0.126542	0.33976	0.817611	0.0210639	0.105262	0.202861	0.337446	0.620278	0.162049	0.571148	0.82458	0.711605	0.000294669	0.00102396
1110007L15Rik	-0.277802	0.371528	0.955693	-0.10535	0.708199	0.992764	-0.0538692	0.847105	0.907206	0.273362	0.431623	0.649032	-0.480239	0.122478	0.300993	-0.308808	0.128134	0.3697	-0.167949	0.553545	0.815286	0.284141	0.113322	0.177238
1110008F13Rik	0.410037	0.305768	0.955693	0.265268	0.437968	0.965949	1.12514	0.000571455	0.00882745	0.332879	0.343139	0.57104	-1.05665	0.00109485	0.0140626	-0.459842	0.0234974	0.137633	-0.394768	0.223777	0.555055	0.658658	0.00703302	0.0163765
1110008J03Rik	0.13264	0.820793	0.981006	-0.621613	0.306279	0.955127	0.310237	0.572969	0.71693	0.972459	0.0237231	0.177198	0.765566	0.0446432	0.165075	0.225708	0.329173	0.614046	0.39471	0.236755	0.569903	0.608028	0.00236818	0.00638595
1110008L16Rik	0.451348	0.340342	0.955693	0.183166	0.670311	0.990767	0.515929	0.208804	0.375676	-1.26011	0.03195	0.196346	-1.29659	0.00753228	0.0530473	-0.37472	0.271264	0.554871	-0.41454	0.282968	0.614719	-0.357269	0.226568	0.315362
1110008P14Rik	0.508535	0.435351	0.955693	0.23727	0.690426	0.991213	1.17145	0.0453421	0.141854	0.260428	0.511028	0.709228	0.437567	0.256917	0.469327	-0.185937	0.450128	0.710337	0.175699	0.54206	0.808392	0.573689	0.01152	0.0252848
1110012J17Rik	0.440492	0.293464	0.955693	-0.374607	0.364715	0.960134	-0.590416	0.140973	0.289616	1.28614	0.000936687	0.0469829	0.914023	0.00593885	0.0455921	1.09396	2.72114e-06	0.000177497	0.819619	0.00436314	0.0803397	-1.40003	3.69118e-13	7.09328e-12
1110012L19Rik	-0.139657	0.773739	0.974201	-0.125425	0.776824	0.995877	0.655434	0.0496896	0.150776	-1.07655	0.0672228	0.255748	-1.04353	0.0250654	0.116404	0.135165	0.564644	0.790725	-0.528267	0.0859792	0.355899	0.337499	0.0827879	0.13627
1110014N23Rik	0.67585	0.221699	0.955693	-0.403409	0.50666	0.974772	1.31291	0.00486533	0.0358053	0.258304	0.459722	0.672633	0.139183	0.680763	0.826206	-0.104554	0.64124	0.832915	-0.0427339	0.880538	0.963827	-0.0451937	0.817267	0.865209
1110018G07Rik	-0.189864	0.592662	0.961274	-0.195819	0.531962	0.978799	-0.0151197	0.963333	0.979228	-0.740451	0.0758372	0.268674	-0.622181	0.0947182	0.256907	-0.0177013	0.931009	0.974664	-0.128905	0.662625	0.865751	-0.382231	0.062381	0.107246
1110018J18Rik	0.363371	0.577908	0.96034	0.0796935	0.858365	0.996527	1.96953	0.00023965	0.00507108	0.170484	0.698704	0.836044	-0.321913	0.418608	0.626538	0.314875	0.251834	0.53342	-0.234604	0.497804	0.785343	1.54673	1.85543e-11	2.71514e-10
1110020A21Rik	-0.0847883	0.990289	1	0.021819	0.914233	0.996527	-1.20461	0.0614665	0.172162	-0.730073	0.365193	0.591948	-0.482997	0.524489	0.712842	0.00518132	1	1	-0.281292	0.773196	0.922125	-0.572625	0.329784	0.42749
1110020G09Rik	-0.556744	0.114101	0.955693	-0.510842	0.119725	0.825855	-0.466052	0.141486	0.290422	-0.466436	0.217718	0.447026	-0.321113	0.367179	0.580967	-0.0865283	0.693223	0.862747	-0.523224	0.0471592	0.266129	0.150361	0.434609	0.533899
1110020P15Rik	-0.295557	0.311405	0.955693	-0.163403	0.529714	0.978714	-0.766725	0.00431222	0.0331811	-1.30967	0.00544442	0.106678	-1.19383	0.000351393	0.00635747	-0.65739	0.00123464	0.0205705	-0.951957	0.000168981	0.0125573	0.251537	0.235966	0.326169
1110021J02Rik	0.10976	0.824484	0.981006	0.398947	0.375228	0.960134	0.0461169	0.935554	0.961766	-0.0302182	0.946517	0.976658	-0.177732	0.629674	0.792852	-0.368675	0.145492	0.397919	-0.0382551	0.908724	0.974246	-0.29181	0.173597	0.251451
1110021L09Rik	0.48032	0.208023	0.955693	0.476281	0.157334	0.862767	0.107127	0.729036	0.829919	-0.272593	0.515162	0.712094	0.0554763	0.89461	0.949112	-0.211319	0.409919	0.678935	-0.418716	0.214653	0.545848	-0.465175	0.0406783	0.0751239
1110028C15Rik	-0.273956	0.456336	0.955693	-0.466342	0.176787	0.888192	-0.186027	0.608659	0.744596	-0.216671	0.665438	0.814148	-0.370992	0.487278	0.681765	0.282802	0.357498	0.639395	-0.13614	0.707054	0.890734	0.185892	0.475621	0.573758
1110032A03Rik	-0.496663	0.426154	0.955693	-0.786626	0.211192	0.924379	-1.32196	0.0209437	0.0878597	-1.80955	0.0090562	0.129886	-0.974495	0.0779353	0.228427	0.12947	0.719589	0.875559	-0.766296	0.0750459	0.333767	0.445864	0.0601806	0.104127
1110032A13Rik	0.221994	0.655668	0.965321	-0.182629	0.714991	0.992764	0.622095	0.120812	0.26154	0.658831	0.0992172	0.303459	0.345626	0.366139	0.580564	0.250324	0.28673	0.573	0.0856222	0.769888	0.920177	0.729195	0.00028162	0.000984093
1110032E23Rik	-0.416204	0.207664	0.955693	-0.274064	0.357918	0.960134	-1.49992	8.35951e-07	7.40583e-05	-0.311764	0.42097	0.639324	-0.457796	0.1436	0.330624	-0.00957512	0.969938	0.99038	-0.309796	0.280452	0.611649	-0.024175	0.900257	0.929022
1110034A24Rik	-0.313164	0.351787	0.955693	-0.304057	0.29774	0.950863	-0.831522	0.00323711	0.0275416	0.527699	0.171322	0.394666	0.463458	0.161557	0.354515	-0.0242876	0.914595	0.967965	-0.07829	0.779817	0.923608	-0.128621	0.521587	0.616685
1110034B05Rik	-0.826077	0.16402	0.955693	-0.493893	0.334495	0.959848	-1.50436	0.00496599	0.0361756	-1.1882	0.0281779	0.187978	-0.137194	0.760472	0.874506	-0.808176	0.0550746	0.230266	-1.05034	0.011467	0.133693	-0.681824	0.035512	0.0667816
1110036O03Rik	0.178669	0.698713	0.972227	-0.647585	0.117198	0.822555	0.27721	0.516699	0.671178	0.447339	0.212797	0.441613	-0.0683743	0.835243	0.917224	-0.36443	0.0641988	0.252567	-0.172552	0.515933	0.794538	-0.402737	0.0300053	0.057843
1110037F02Rik	-0.070406	0.805175	0.979835	0.145368	0.535451	0.979378	0.0319222	0.891036	0.934755	-0.494879	0.185334	0.412302	-0.234003	0.462866	0.661901	-0.247678	0.27908	0.563923	-0.132905	0.631981	0.854953	-1.32687	1.70014e-12	2.93046e-11
1110038B12Rik	-0.186948	0.508003	0.955693	-0.0246446	0.929157	0.996527	-0.342409	0.165219	0.322742	0.316585	0.372531	0.597799	0.396698	0.228348	0.436156	0.308717	0.123017	0.360527	-0.221313	0.382075	0.697474	1.71108	5.2548e-17	1.62664e-15
1110038D17Rik	-0.0177006	0.980396	1	-0.353883	0.2931	0.949068	-0.26095	0.388917	0.561625	-0.150757	0.674492	0.819127	-0.405409	0.239974	0.450097	-0.0456174	0.834345	0.932135	0.0494773	0.856027	0.955767	-0.313618	0.109224	0.171798
1110038F14Rik	0.0644443	0.836626	0.981501	-0.191584	0.595152	0.986681	0.077261	0.793294	0.869617	0.634022	0.130365	0.344283	0.572678	0.130853	0.313998	0.391482	0.127557	0.369097	0.273256	0.373506	0.689912	0.962309	6.65327e-05	0.000272912
1110049F12Rik	-0.160866	0.713532	0.972787	0.190211	0.573889	0.981301	0.32571	0.319234	0.493335	-0.0566911	0.876475	0.940056	-0.58781	0.0791118	0.230191	-0.069081	0.768516	0.90095	-0.52509	0.0589724	0.296496	0.46457	0.0107819	0.0238166
1110051M20Rik	-0.0672659	0.891593	0.989011	-0.358348	0.370654	0.960134	0.274496	0.424466	0.591975	-0.200609	0.582908	0.761941	-0.136472	0.677929	0.824486	0.213123	0.305548	0.59062	0.215998	0.403024	0.713658	0.623025	0.000629361	0.00198893
1110054O05Rik	-0.26952	0.438011	0.955693	0.331561	0.241728	0.93973	-0.121414	0.677642	0.795445	-0.211926	0.546854	0.735753	0.211597	0.506546	0.698347	0.363374	0.0777416	0.280094	0.221685	0.382602	0.697801	-0.0310334	0.864139	0.902858
1110057K04Rik	0.0525388	0.850177	0.984545	0.112651	0.661945	0.990689	-0.0338177	0.90889	0.946741	-0.814751	0.0807864	0.277958	-0.458902	0.209003	0.412631	-0.191978	0.4189	0.686022	-0.377053	0.248717	0.582948	-0.345372	0.0601474	0.104087
1110058L19Rik	-1.10725	0.0737893	0.955693	-0.849607	0.136843	0.846325	-1.19355	0.0293924	0.108202	-0.952304	0.123276	0.335595	-1.01483	0.0349189	0.142941	-0.476687	0.16466	0.426651	-0.431138	0.325537	0.651706	0.553463	0.070546	0.11927
1110059E24Rik	-0.0587917	0.863253	0.986037	-0.216584	0.452862	0.967686	-0.223774	0.423906	0.591607	-1.4876	0.0159252	0.156256	-1.63328	0.000354956	0.0064059	-0.520534	0.0800058	0.285164	-0.828982	0.0140002	0.147854	-0.507575	0.0551135	0.0968537
1110059G10Rik	-0.612945	0.180601	0.955693	-0.410461	0.337904	0.960134	-0.413596	0.291427	0.465798	0.21182	0.661967	0.811974	-0.345463	0.444954	0.647135	-0.0680887	0.84206	0.935623	0.167743	0.654361	0.862669	0.459419	0.108983	0.171446
1110067D22Rik	-0.828953	0.0588775	0.955693	-0.942637	0.0200965	0.438869	-1.96007	2.96214e-06	0.000195776	-0.490436	0.239947	0.470373	-0.24942	0.532886	0.720234	0.0111645	0.967269	0.989176	-0.261488	0.371425	0.688189	0.898548	9.62681e-05	0.000380799
1190002H23Rik	-1.26921	0.0803163	0.955693	-1.32807	0.0623971	0.68792	-2.87949	0.000134175	0.00343309	0.9996	0.0490517	0.226807	0.516764	0.22587	0.433164	0.109096	0.722569	0.876783	-0.117298	0.775378	0.922191	0.899601	0.00078521	0.00241889
1190002N15Rik	-0.147743	0.681304	0.969978	0.639444	0.0245042	0.493109	0.114519	0.69804	0.808454	0.401748	0.325097	0.553758	0.0414558	0.919927	0.961751	-0.161521	0.514167	0.758515	0.0530613	0.863626	0.958982	-0.806657	0.000264408	0.000929202
1190005F20Rik	-0.260878	0.416125	0.955693	-0.624393	0.0341937	0.552195	-0.0753009	0.790386	0.867773	0.213794	0.533339	0.725241	1.62589	3.61566e-07	3.42423e-05	-0.0417001	0.856712	0.942488	-0.435581	0.112009	0.4059	0.12488	0.525921	0.620264
1190005I06Rik	-0.21603	0.821955	0.981006	-0.636855	0.42331	0.962719	0.0252056	0.939288	0.964116	0.353638	0.512154	0.710156	-1.19005	0.00846962	0.0578981	-0.17098	0.574844	0.795371	0.0376618	0.934405	0.982547	0.252694	0.332343	0.430173
1190007I07Rik	-1.1488	0.0720034	0.955693	-0.809516	0.160078	0.867557	-1.69811	0.00476519	0.0352011	0.436058	0.362494	0.589969	0.274406	0.493237	0.686446	-0.107435	0.709819	0.871018	-0.489388	0.184609	0.515399	1.13085	3.17465e-05	0.000140252
1200003C05Rik	-0.265292	0.491256	0.955693	0.106683	0.736023	0.9929	-0.23188	0.476782	0.637327	-1.66031	0.0303534	0.192457	-0.895692	0.142481	0.329166	-0.726972	0.0455436	0.206038	-0.887543	0.070017	0.323165	-0.510291	0.0114969	0.0252396
1200009F10Rik	-0.452389	0.18593	0.955693	-0.0425743	0.896087	0.996527	-0.976947	0.00120184	0.0144685	-0.30757	0.47237	0.681357	-0.407068	0.35892	0.572848	-1.3581	7.03049e-07	5.43909e-05	-0.175116	0.583574	0.830393	-1.11886	6.45051e-06	3.33815e-05
1200011I18Rik	-0.36538	0.247377	0.955693	-0.181828	0.514726	0.975024	-0.584901	0.0407388	0.132305	-0.714096	0.111175	0.320253	-0.231982	0.538833	0.724445	0.0676755	0.787649	0.912365	-0.136317	0.673252	0.871586	-0.467033	0.0255205	0.0502555
1200011M11Rik	0.465226	0.211391	0.955693	0.441543	0.198877	0.913149	0.791434	0.0207218	0.0871485	-0.037506	0.920697	0.96324	0.342192	0.311129	0.526194	0.11911	0.614305	0.817981	0.219801	0.431883	0.739187	0.316475	0.1338	0.203152
1200014J11Rik	-0.371028	0.284964	0.955693	-0.397571	0.206241	0.919393	-0.437536	0.140323	0.289046	-0.737879	0.0755628	0.267797	-0.91061	0.0129768	0.0768113	-0.0679104	0.780275	0.90791	-0.170749	0.565726	0.821667	-0.301496	0.131475	0.20011
1200014M14Rik	-0.2347	0.590224	0.96034	-0.50756	0.220668	0.929887	0.448775	0.212915	0.380396	-1.06005	0.0139173	0.150924	-1.48266	9.16392e-05	0.00245849	0.0949088	0.666467	0.8481	-0.363576	0.186591	0.517273	0.613913	0.00118187	0.00347219
1200016B10Rik	-0.521214	0.165205	0.955693	0.236064	0.452218	0.967686	-0.672591	0.0428767	0.136931	-1.21381	0.0675541	0.256047	1.19727	0.0083923	0.0576429	-0.620966	0.0436968	0.200688	-0.642681	0.118196	0.417703	-0.482922	0.0319607	0.0611049
1300001I01Rik	0.324006	0.357359	0.955693	-0.0192367	0.969479	0.998839	0.555391	0.103118	0.237009	-0.143287	0.662349	0.812169	-0.543716	0.0808291	0.232874	-0.180957	0.386711	0.660464	0.121107	0.632806	0.855149	-0.0118625	0.951268	0.966275
1300003B13Rik	-0.774697	0.0874649	0.955693	-0.942398	0.0271223	0.511683	-0.857303	0.0407338	0.132305	0.52512	0.30653	0.536696	0.162394	0.724855	0.854114	0.525492	0.0939158	0.312187	0.848599	0.0241441	0.190631	0.288968	0.304324	0.400998
1300010F03Rik	-0.220913	0.613936	0.962589	-0.0333035	0.948206	0.997148	-0.800937	0.0277168	0.104942	0.0708956	0.844923	0.91996	0.996502	0.0116918	0.0721164	0.25454	0.231553	0.510132	0.861728	0.0148431	0.150205	-0.31677	0.103139	0.163723
1300014I06Rik	-0.0118616	0.994888	1	-0.64583	0.199708	0.913842	-1.02322	0.0173208	0.0783597	0.271231	0.558033	0.743191	-0.199371	0.605232	0.774387	-0.0989099	0.705742	0.869096	-0.384548	0.233775	0.566319	-0.702248	0.0025361	0.00678014
1300018I05Rik	0.438147	0.268197	0.955693	0.39448	0.251761	0.93973	1.12442	0.000882198	0.0116768	0.102037	0.740517	0.86205	-0.219009	0.451455	0.653258	0.119953	0.524182	0.764034	0.230303	0.323514	0.649617	-0.229886	0.184976	0.265391
1300018I17Rik	0.112463	0.77661	0.974201	-0.00642562	1	1	0.174166	0.609236	0.74512	0.940691	0.0213039	0.172092	0.74449	0.054248	0.183462	0.320997	0.16234	0.423348	0.576064	0.0605368	0.29955	0.500448	0.0206312	0.041909
1300018J18Rik	0.0240139	0.95467	0.998784	-0.588075	0.184058	0.893789	-0.50129	0.184958	0.347229	-0.320017	0.394693	0.616534	-0.526374	0.143904	0.330997	-0.083354	0.707027	0.86979	-0.616956	0.0246033	0.191979	0.175318	0.362858	0.46214
1500001A10Rik	-0.316813	0.501489	0.955693	-1.10094	0.0173902	0.419213	-0.471761	0.232254	0.402529	0.201277	0.629992	0.794055	0.330593	0.393551	0.604438	0.0107941	0.967652	0.989233	0.672945	0.0193245	0.169472	0.243737	0.237835	0.328207
1500001M20Rik	-0.0341489	0.93411	0.994867	0.141038	0.635557	0.989904	-0.569348	0.0773518	0.198916	-0.591389	0.154896	0.374115	-0.634525	0.117152	0.292624	-0.216548	0.448378	0.709162	-0.242576	0.450353	0.753668	-0.130137	0.612241	0.697747
1500002O20Rik	0.639976	0.322845	0.955693	0.779183	0.208345	0.921143	0.859066	0.138478	0.286248	0.641109	0.0718961	0.263139	0.102313	0.759855	0.874363	0.734942	0.000213049	0.00580936	0.581452	0.0267136	0.200603	0.611443	0.000766679	0.00236961
1500003O03Rik	0.0257496	0.910935	0.991053	0.126336	0.576651	0.981301	0.373903	0.10062	0.23326	-0.915236	0.0211247	0.171881	-0.548384	0.0993294	0.263916	-0.432122	0.0357299	0.178919	-0.33523	0.328477	0.653941	-0.814781	4.52119e-06	2.43636e-05
1500010J02Rik	0.764242	0.249379	0.955693	0.481832	0.423866	0.962719	1.34575	0.0205665	0.0868132	0.098645	0.753028	0.869493	-0.0423274	0.888172	0.946599	0.068327	0.724252	0.877504	0.347303	0.146164	0.461923	-0.403247	0.0259777	0.0510852
1500011B03Rik	-0.406794	0.520541	0.95698	-0.207794	0.693518	0.991213	-1.21978	0.0154203	0.0729832	-0.409374	0.423465	0.642089	0.210936	0.593826	0.76596	0.165685	0.607522	0.814243	-0.209255	0.56496	0.821431	0.916115	0.0001302	0.000494205
1500011H22Rik	-0.342949	0.317071	0.955693	-0.0932603	0.751873	0.9929	-0.606843	0.0621241	0.173078	-1.19175	0.00235002	0.0720366	-1.49207	0.000690782	0.0103514	-0.516597	0.0161853	0.109809	-0.772668	0.00756487	0.108791	-0.0629812	0.737241	0.803064
1500011K16Rik	-0.639662	0.166273	0.955693	-0.473375	0.2681	0.946124	-0.824111	0.0418985	0.134697	-0.0306695	0.949153	0.977582	-0.171977	0.643301	0.800788	-0.172148	0.516091	0.759002	-0.604342	0.0988766	0.38307	1.2978	1.14105e-10	1.45437e-09
1500012F01Rik	-0.376357	0.257543	0.955693	0.0403666	0.878252	0.996527	-0.245329	0.414282	0.58315	-0.152157	0.677467	0.82103	-0.343519	0.331971	0.546711	1.05745	9.85674e-07	7.39626e-05	0.120022	0.655025	0.862669	2.46643	3.03238e-31	3.47852e-29
1500031L02Rik	-0.0926877	0.809643	0.979881	0.253698	0.403698	0.960134	0.941205	0.000688868	0.0100953	-0.254784	0.550313	0.738089	-0.148383	0.721469	0.851598	-0.217073	0.380184	0.657149	-0.292752	0.340423	0.662007	-0.414364	0.0495402	0.0885248
1500032L24Rik	-0.0550721	0.847816	0.984087	-0.0827936	0.741901	0.9929	0.0476671	0.841949	0.903866	0.256083	0.457082	0.671033	0.215018	0.505415	0.697992	-0.328127	0.112245	0.344178	-0.291743	0.301198	0.630771	0.240636	0.189165	0.270546
1500035H01Rik	-0.122037	0.699119	0.972227	-0.0688112	0.810119	0.996172	0.0817537	0.754517	0.846077	-0.737442	0.104675	0.311121	-0.480063	0.139984	0.326098	0.0737251	0.706407	0.86938	-0.21469	0.420326	0.729412	0.388507	0.0250248	0.049455
1500041N16Rik	0.401166	0.518624	0.956934	0.190519	0.732591	0.9929	0.37398	0.499532	0.65613	0.301791	0.438642	0.65622	0.049768	0.893377	0.949111	0.227683	0.330937	0.615152	-0.202997	0.505629	0.789328	1.00883	2.87897e-07	2.04645e-06
1600002H07Rik	0.20335	0.605539	0.96167	0.220099	0.535367	0.979378	1.2873	0.000118364	0.00318402	0.213606	0.560716	0.745331	0.461265	0.17445	0.369406	0.591302	0.00704464	0.0654645	0.622998	0.0196755	0.17092	-0.354031	0.0721473	0.121524
1600012F09Rik	-0.499299	0.179959	0.955693	-0.394705	0.221703	0.929887	-1.30741	5.89004e-05	0.00193152	0.216786	0.553576	0.740674	0.169821	0.618221	0.784837	0.124082	0.586531	0.800983	-0.547469	0.0629538	0.304251	0.671212	0.00122371	0.00358561
1600012H06Rik	-0.628046	0.113305	0.955693	-1.12255	0.0025036	0.123003	-1.04091	0.00325534	0.0275842	0.156433	0.667996	0.81459	0.0279467	0.934405	0.968768	-0.132585	0.539483	0.773236	-0.0178265	0.947856	0.986529	-0.406228	0.0313104	0.0600458
1600021P15Rik	0.376276	0.419959	0.955693	0.251711	0.563046	0.980133	0.546087	0.19389	0.358404	0.00797801	0.983409	0.993795	-0.00447793	0.990505	0.997117	0.319032	0.130741	0.374025	0.152825	0.555989	0.816115	-0.17508	0.359547	0.4588
1600027N09Rik	-0.174883	0.705164	0.972787	-0.258357	0.540382	0.979378	0.0681397	0.859154	0.915183	0.0131921	0.975069	0.989746	-0.312944	0.387112	0.599811	0.127296	0.59787	0.807735	-0.104417	0.727985	0.900172	0.592241	0.00271377	0.00717631
1700008J07Rik	-0.0929432	0.893232	0.98914	0.2819	0.505932	0.974669	-0.360693	0.369693	0.543554	0.364622	0.529062	0.722177	-0.0532407	0.920118	0.96185	-0.645323	0.146601	0.399419	-0.796718	0.119849	0.420125	-1.08974	0.0115593	0.0253598
1700010I14Rik	-1.16993	0.0703995	0.955693	-1.92407	0.00178059	0.100397	-0.897088	0.0600185	0.169361	-0.138891	0.820644	0.906886	0.361404	0.423494	0.630806	1.04778	0.00136079	0.0217988	0.393613	0.3217	0.64873	0.97831	0.000933873	0.00281913
1700016D06Rik	1.20089	0.0715523	0.955693	1.21375	0.0516246	0.653824	0.624047	0.291107	0.465507	-0.294811	0.596361	0.771643	0.700979	0.154142	0.344145	0.239014	0.553034	0.784401	0.449626	0.317014	0.643834	-0.763699	0.0421698	0.0773773
1700017B05Rik	1.04053	0.0987268	0.955693	0.0966428	0.844528	0.996527	1.20896	0.0366295	0.123584	0.873906	0.0204582	0.170444	0.668152	0.0479333	0.171645	-0.224396	0.308104	0.592578	0.495646	0.074423	0.332026	-0.667958	0.00111341	0.00329045
1700019E19Rik	-0.362601	0.331124	0.955693	-0.391536	0.228464	0.932122	-0.888107	0.00973045	0.0550787	0.096478	0.803264	0.899513	0.140837	0.694626	0.834125	0.0970741	0.684594	0.857019	0.0330504	0.910295	0.974832	0.880374	2.22443e-05	0.000101231
1700020I14Rik	-0.312461	0.381459	0.955693	-0.323523	0.323099	0.956525	-0.306666	0.314094	0.488416	-0.0177718	0.967717	0.986598	-0.0112537	0.978403	0.991512	-0.485319	0.0746916	0.273743	-0.389864	0.227375	0.558415	-1.05709	2.68989e-05	0.00012049
1700020O03Rik	-0.484376	0.164767	0.955693	-0.61673	0.0516234	0.653824	-0.288591	0.335045	0.50991	0.199677	0.578818	0.759879	0.219002	0.519604	0.709594	0.530145	0.011738	0.0907402	0.0649699	0.806281	0.936035	0.352524	0.0635714	0.108992
1700021F05Rik	-0.373292	0.330325	0.955693	-0.439766	0.193332	0.910963	-0.827437	0.0130438	0.0661468	0.211207	0.582627	0.761702	0.372536	0.297565	0.512548	0.148183	0.532198	0.768502	-0.0738689	0.796995	0.932574	0.707126	0.000679299	0.00213236
1700021K19Rik	0.0467341	0.902231	0.990786	-0.404532	0.313058	0.955127	0.992686	0.00475338	0.0351659	0.465456	0.124571	0.337282	0.854315	0.00329941	0.0303864	0.580275	0.00213998	0.0298575	0.387139	0.0944868	0.374049	0.290742	0.0878571	0.143107
1700022C21Rik	-0.72873	0.207013	0.955693	-1.60716	0.00634156	0.225227	-0.695315	0.169324	0.327746	-3.01954	0.000358503	0.0310939	-1.71194	0.0211933	0.105392	-1.07643	0.0601364	0.242489	-1.79656	0.00494755	0.0857579	-1.7128	0.00120468	0.00353504
1700024P16Rik	-0.316685	0.579436	0.96034	-1.73078	0.00337319	0.149584	-1.52109	0.00546124	0.0385727	-0.283219	0.601838	0.77513	-0.310058	0.494794	0.687845	0.484866	0.127491	0.369014	0.463866	0.219535	0.551603	0.85087	0.00327046	0.00841432
1700025G04Rik	0.163779	0.595782	0.961274	0.307508	0.285387	0.948861	-0.361416	0.227046	0.396002	-0.431291	0.250821	0.480735	-0.34809	0.331792	0.54665	-0.227035	0.275428	0.560085	0.0608536	0.831185	0.945635	-1.20081	2.6711e-11	3.78659e-10
1700025K23Rik	-0.403508	0.553986	0.957503	-0.606368	0.342093	0.960134	-1.00276	0.0743319	0.193766	-1.60373	0.0502642	0.228008	-1.5495	0.0106741	0.0675951	-0.446364	0.170427	0.434633	-0.841887	0.0530031	0.281068	0.234252	0.340851	0.438985
1700029F09Rik	-0.459354	0.241437	0.955693	-0.350426	0.278036	0.948861	-1.41669	3.69876e-05	0.00143076	-0.683839	0.167115	0.389311	-1.32062	0.00387179	0.0339547	-0.430142	0.144579	0.396947	-0.257639	0.458886	0.760003	0.0454219	0.854595	0.895042
1700029G01Rik	-1.24515	0.0736482	0.955693	-0.332557	0.601473	0.986851	-0.820196	0.143492	0.292597	-0.181529	0.75743	0.872076	-0.0840613	0.915797	0.959644	0.676888	0.0415718	0.194592	1.04303	0.00745623	0.108159	-0.0508043	0.925269	0.94797
1700029I01Rik	-0.18235	0.717737	0.972971	0.0386107	0.931226	0.996527	-0.507103	0.207468	0.374351	-0.773081	0.159729	0.379485	0.211044	0.620514	0.786379	0.10229	0.759124	0.897105	-0.506494	0.160519	0.481943	-0.156989	0.560867	0.651548
1700034H14Rik	-0.794444	0.160284	0.955693	-0.716321	0.168429	0.880853	-0.987089	0.0569346	0.163701	-1.36178	0.0974644	0.300307	-0.450131	0.511601	0.702084	-0.0354941	0.928754	0.973743	-0.378669	0.415766	0.725197	0.696106	0.0260205	0.0511592
1700037H04Rik	0.470751	0.342814	0.955693	0.342439	0.462259	0.967931	0.689094	0.143164	0.292304	0.265475	0.507766	0.707524	0.269365	0.475268	0.672219	-0.722236	0.00754148	0.0685464	-0.121656	0.707964	0.891011	-0.283123	0.284486	0.379365
1700040I03Rik	0.30655	0.401137	0.955693	0.261162	0.441577	0.966496	-0.219275	0.504485	0.660816	-0.384059	0.312121	0.542075	0.0852073	0.805499	0.901017	-0.513644	0.0329552	0.170058	-0.540217	0.0620803	0.302078	-0.670876	0.00259323	0.00691807
1700049G17Rik	-0.264406	0.67031	0.967922	-0.596599	0.29594	0.949068	0.115204	0.797103	0.871695	-1.11838	0.0745934	0.266633	-0.446842	0.435933	0.640855	0.238029	0.529137	0.766551	-0.655013	0.198589	0.531088	-1.06268	0.00587447	0.0139722
1700052N19Rik	-0.0598238	0.874517	0.986758	-0.281405	0.380358	0.960134	-0.348074	0.261018	0.433509	-0.37431	0.299081	0.528708	-0.269925	0.414841	0.622761	-0.371935	0.0917997	0.308576	-0.365788	0.159816	0.480718	-0.631022	0.00112533	0.00332174
1700054N08Rik	0.0676202	0.820859	0.981006	-0.24406	0.435272	0.965072	-0.220704	0.471583	0.632896	0.453172	0.268515	0.497063	-0.252131	0.507827	0.699339	-0.193147	0.494497	0.743513	0.0449422	0.892077	0.968025	-1.45006	4.35955e-08	3.59573e-07
1700081L11Rik	0.222776	0.478328	0.955693	0.570365	0.046144	0.627408	0.563761	0.047429	0.14604	0.249061	0.463497	0.675186	0.53048	0.0967926	0.26024	0.205866	0.385998	0.660464	0.204033	0.46583	0.765004	0.103388	0.655374	0.735564
1700086O06Rik	0.0163723	0.980484	1	0.0174095	0.969539	0.998839	-0.318351	0.477408	0.637651	0.221719	0.637356	0.798495	0.291101	0.470625	0.668493	0.577879	0.0296847	0.159276	0.299419	0.361481	0.680933	0.789353	0.000608797	0.00193005
1700094D03Rik	0.145713	0.762618	0.974201	0.599507	0.178323	0.889387	-0.129349	0.78246	0.86315	-1.4715	0.0633545	0.249527	-0.445335	0.380622	0.593904	-0.730713	0.0556071	0.231909	-0.988846	0.040839	0.246566	-1.16707	9.61903e-05	0.000380642
1700106N22Rik	0.181243	0.744041	0.974136	-0.279712	0.733718	0.9929	0.998309	0.0692775	0.186057	-0.0353189	0.954631	0.980974	0.284354	0.475667	0.672463	0.593906	0.0352426	0.177189	0.412934	0.227428	0.558415	1.21483	5.77914e-07	3.86567e-06
1700113i22rik	-0.249182	0.595853	0.961274	-0.560397	0.207198	0.919702	-0.425278	0.266845	0.440209	-0.216395	0.626338	0.791147	-0.282023	0.454006	0.654861	-0.124244	0.663698	0.846371	-0.177484	0.579094	0.828572	0.055908	0.828551	0.874187
1700123O20Rik	-0.441565	0.214632	0.955693	-0.303627	0.34508	0.960134	-0.514727	0.115406	0.2542	-0.771521	0.0637737	0.250179	-0.904975	0.0455443	0.167169	-0.075576	0.744961	0.889319	-0.487864	0.106797	0.398592	0.588383	0.00409028	0.010218
1810006K21Rik	0.0931483	0.733996	0.974136	0.201121	0.414451	0.960673	-0.12092	0.643317	0.769317	-1.00827	0.0681361	0.256552	-0.963911	0.0275042	0.123331	-0.463241	0.0279898	0.154501	-0.402295	0.108614	0.400848	0.471456	0.0118268	0.0258727
1810007M14Rik	-0.301649	0.346305	0.955693	0.285386	0.286179	0.948861	-0.319035	0.26568	0.439061	0.134904	0.706216	0.841418	0.534007	0.0984817	0.262653	0.741883	0.000391425	0.00916999	0.168416	0.518742	0.795603	0.943781	2.28433e-07	1.652e-06
1810008A18Rik	0.539222	0.202556	0.955693	-0.0347105	0.958876	0.998816	0.739436	0.0520838	0.155441	0.894526	0.0107802	0.136551	0.615771	0.0604426	0.19636	0.360593	0.0804539	0.285944	0.346207	0.203834	0.538165	0.538451	0.00222507	0.00604249
1810009A15Rik	0.00847167	0.962651	0.998784	-0.100127	0.696485	0.991213	-0.609106	0.0225511	0.0923133	0.396946	0.285144	0.514847	0.53325	0.153217	0.343542	0.0520189	0.852031	0.940935	0.370438	0.235389	0.568671	0.494033	0.081897	0.135052
1810011O10Rik	-0.793682	0.231861	0.955693	-2.16481	0.00476521	0.184329	0.599806	0.27777	0.451195	-0.111387	0.854412	0.926218	1.05055	0.0176674	0.0939044	1.22364	6.70836e-05	0.00236483	1.42651	8.86231e-05	0.00822627	-0.704246	0.0325417	0.0620138
1810012P15Rik	-0.170542	0.794159	0.978114	0.219085	0.630073	0.987954	-0.269523	0.584267	0.726512	-0.364008	0.409755	0.629132	-0.282543	0.447463	0.649177	-0.134779	0.619263	0.82104	-0.538364	0.0968264	0.378506	0.222575	0.309881	0.406335
1810013D10Rik	-0.0829374	0.934871	0.994867	-0.682583	0.2381	0.938481	-0.0699055	0.94704	0.96938	-0.621553	0.18141	0.406645	-0.819489	0.0443113	0.164519	0.141011	0.625979	0.824402	0.205779	0.555362	0.815676	0.468694	0.0604061	0.104499
1810013L24Rik	-0.0805888	0.780461	0.974466	-0.0286613	0.917921	0.996527	0.014067	0.951311	0.972073	0.709713	0.0419413	0.215712	0.463477	0.152749	0.343017	0.201647	0.448792	0.709368	-0.217497	0.424663	0.733555	-0.0569402	0.782113	0.838849
1810014B01Rik	-0.415282	0.470162	0.955693	-0.92532	0.104544	0.805774	-1.35947	0.00905459	0.0525325	-0.519427	0.256229	0.48523	-0.501431	0.205192	0.408257	-0.127819	0.651117	0.837714	-0.16263	0.638741	0.856505	0.468952	0.078096	0.129748
1810014F10Rik	0.135505	0.778244	0.974201	-0.119738	0.81524	0.996172	-0.204705	0.593074	0.732988	0.0672451	0.880431	0.942172	0.271418	0.489583	0.683245	-0.130964	0.617425	0.819619	-0.125156	0.70506	0.889226	0.480618	0.028107	0.0546798
1810020D17Rik	-0.101646	0.845018	0.983037	-0.0574333	0.916349	0.996527	0.403363	0.31422	0.488536	-0.108173	0.824296	0.908787	0.0510312	0.901555	0.953179	-0.22125	0.408725	0.67815	-0.0702702	0.850412	0.953044	0.0192358	0.947418	0.963639
1810022K09Rik	-1.24891	0.0506341	0.955693	-0.827868	0.138824	0.849468	-2.32356	6.12455e-05	0.00196537	-1.70536	0.0279935	0.187626	-2.71726	3.29878e-05	0.00120593	-1.05386	0.0935569	0.311431	-1.33883	0.0287242	0.208021	-1.34123	0.0115993	0.0254253
1810026J23Rik	-0.269227	0.422665	0.955693	0.0181137	0.945816	0.997148	0.0514739	0.857432	0.913985	-0.37498	0.321855	0.551341	-0.251925	0.451754	0.653386	-0.00348172	0.987199	0.998082	-0.0588325	0.842297	0.94963	-0.159217	0.365425	0.464934
1810027O10Rik	0.35335	0.351939	0.955693	0.194005	0.566369	0.980631	0.564269	0.0906601	0.218601	0.661472	0.0658737	0.253438	0.0960123	0.783627	0.88679	-0.000385972	1	1	0.269799	0.34567	0.6674	0.436066	0.0405946	0.074997
1810029B16Rik	-0.0544195	0.881219	0.987001	0.0727931	0.786238	0.996172	-0.268078	0.346946	0.52135	0.32631	0.380598	0.605065	0.207374	0.54829	0.731593	0.393232	0.0866587	0.298947	0.0373327	0.895751	0.96986	1.38636	1.25413e-10	1.58633e-09
1810030N24Rik	-0.528735	0.32774	0.955693	-0.368296	0.484483	0.97191	-0.893529	0.0580108	0.16557	-0.610222	0.362949	0.590132	0.155573	0.786038	0.888177	0.161291	0.734233	0.882849	-0.789698	0.15816	0.478748	0.63664	0.138289	0.208825
1810030O07Rik	0.369251	0.357391	0.955693	0.0671938	0.843804	0.996527	0.142106	0.687863	0.801037	-0.333988	0.371591	0.596986	0.171903	0.600015	0.770775	0.114109	0.592802	0.804382	0.123918	0.668878	0.86918	0.104341	0.585081	0.67354
1810031K17Rik	0.442971	0.486352	0.955693	0.0899391	0.856522	0.996527	1.07691	0.069318	0.186116	0.980128	0.00281129	0.0790119	1.46436	1.33531e-05	0.00059493	0.634166	0.00148028	0.0229755	0.6355	0.0128405	0.140704	1.72567	8.70136e-20	3.74309e-18
1810032O08Rik	0.0083742	1	1	-0.25473	0.722794	0.9929	-0.161731	0.800642	0.874511	0.132651	0.767302	0.878174	0.264311	0.511323	0.702084	1.51314	2.2959e-10	4.77357e-08	0.284647	0.363711	0.6824	2.2148	1.29828e-29	1.24585e-27
1810035L17Rik	-0.690623	0.217328	0.955693	-0.332239	0.477824	0.970314	-0.988281	0.048476	0.148084	-1.4522	0.104684	0.311121	-0.96568	0.160613	0.353767	-0.665714	0.105204	0.332363	-0.973371	0.104509	0.395592	-0.151598	0.607349	0.693513
1810037I17Rik	-0.673241	0.0847366	0.955693	-0.706917	0.0523848	0.655602	-0.9274	0.00976314	0.055111	0.353664	0.354177	0.582417	0.379522	0.276757	0.490157	-0.257164	0.307775	0.592409	-0.145745	0.62844	0.852846	0.108939	0.66187	0.740474
1810043G02Rik	0.362097	0.430341	0.955693	-0.159736	0.766843	0.995033	1.89622	1.45747e-06	0.000111035	0.800277	0.0449598	0.220273	0.79976	0.0243653	0.114755	0.169005	0.439304	0.702016	0.321113	0.266969	0.601186	0.637808	0.0015804	0.00449356
1810043H04Rik	-0.39488	0.376669	0.955693	-0.647299	0.131885	0.842902	-0.471653	0.21283	0.380373	0.192377	0.646613	0.803836	-0.200723	0.585878	0.760657	-0.543797	0.0302999	0.161621	-0.520632	0.127179	0.433934	0.56181	0.0163866	0.0342201
1810046J19Rik	0.0777642	0.836938	0.981501	-0.198616	0.595817	0.986681	0.514734	0.0978255	0.229236	0.440996	0.242503	0.47237	0.921863	0.00832683	0.0573115	-0.440728	0.0670718	0.259549	-0.225506	0.417468	0.727108	0.467434	0.0292974	0.0566547
1810048J11Rik	-0.0467812	0.923532	0.992307	-0.282525	0.430336	0.963272	0.162619	0.597332	0.737063	-0.483098	0.21736	0.447026	-0.140506	0.684484	0.828119	-0.302953	0.177814	0.445315	-0.564308	0.0406919	0.246252	-0.372806	0.0543732	0.0957214
1810055G02Rik	0.297531	0.495585	0.955693	-0.00359496	0.984066	1	0.511168	0.192387	0.356793	0.514781	0.121206	0.333142	0.605579	0.0499265	0.174708	0.267165	0.166446	0.428806	0.604029	0.0147451	0.149849	0.62051	0.000512936	0.00166151
1810058I24Rik	0.246107	0.428745	0.955693	0.184112	0.511168	0.975024	-0.184506	0.53471	0.686099	-0.296068	0.405689	0.625197	-0.334111	0.273685	0.48662	-0.143988	0.458422	0.716869	-0.122322	0.612775	0.846305	0.543323	0.00698877	0.0162886
1810063B05Rik	-0.78853	0.114523	0.955693	-0.884315	0.0542822	0.663414	-0.987068	0.0266069	0.102349	0.279942	0.516111	0.712715	-0.0962775	0.80736	0.902291	-0.770126	0.0029275	0.0367117	-0.81546	0.0260154	0.198066	0.00682658	0.980069	0.986609
1810063B07Rik	-0.110429	0.914836	0.991704	-0.401141	0.549803	0.980133	-0.0224261	1	1	0.262316	0.562811	0.747121	-0.423557	0.247845	0.459832	-0.435618	0.081023	0.286944	-0.3707	0.245412	0.578872	0.276541	0.208262	0.293523
1810064F22Rik	-0.430991	0.510472	0.955693	0.0118246	1	1	-0.744666	0.167887	0.326039	-1.65928	0.0781069	0.272364	-1.98845	0.000312127	0.00589541	-0.795278	0.102761	0.327653	-0.48258	0.453735	0.756605	-0.650634	0.126787	0.194636
1810074P20Rik	-0.380529	0.245084	0.955693	-0.629899	0.0352626	0.560383	-0.343461	0.243629	0.415484	-0.667392	0.128913	0.342807	-0.805008	0.0393813	0.153586	0.148904	0.584457	0.800231	-0.477029	0.146524	0.462608	0.635272	0.00523853	0.0126495
2010002N04Rik	0.33991	0.569017	0.958723	1.91266	0.00126536	0.0770018	1.08002	0.0541162	0.158894	-0.661225	0.158886	0.378624	-0.540143	0.168051	0.361954	0.561959	0.0363855	0.180302	0.455609	0.172605	0.49979	1.17138	8.76877e-07	5.59002e-06
2010005J08Rik	0.372243	0.352186	0.955693	-0.178265	0.665166	0.990689	0.631296	0.0865188	0.21241	0.124549	0.707186	0.842009	0.119469	0.705526	0.841748	-0.280481	0.200424	0.474355	-0.27116	0.297268	0.627483	-0.353972	0.0723346	0.121809
2010007H12Rik	-0.180465	0.72641	0.973017	-0.368596	0.461535	0.967931	-0.0343792	0.940521	0.964965	0.688645	0.152212	0.370734	0.311918	0.435734	0.640855	-0.151052	0.579249	0.798231	-0.190951	0.586693	0.83089	1.00086	7.58908e-05	0.000307258
2010011I20Rik	0.381672	0.49427	0.955693	0.229171	0.637885	0.989904	1.62022	0.000734644	0.0104347	0.239828	0.572877	0.75526	0.283747	0.447974	0.649729	0.198875	0.434067	0.698326	0.281499	0.374865	0.691306	-0.0443256	0.836422	0.880816
2010012O05Rik	-0.724625	0.101627	0.955693	-0.833206	0.0493929	0.646343	-1.30561	0.00131695	0.015265	-0.804941	0.0582784	0.241391	-1.09666	0.00261656	0.0254763	-0.316387	0.190278	0.462488	-0.612917	0.0614636	0.301823	0.0728321	0.713753	0.784258
2010015L04Rik	-1.09217	0.106487	0.955693	-0.143102	0.798904	0.996172	-0.0140388	0.936662	0.962311	0.15334	0.765227	0.877298	0.23117	0.618834	0.785289	0.55572	0.0913266	0.307607	0.229452	0.544665	0.809619	0.896061	0.00160795	0.00456149
2010106G01Rik	0.112402	0.744209	0.974136	0.00884381	0.960657	0.998816	0.400741	0.193539	0.358217	-0.193179	0.627565	0.791995	0.058177	0.866986	0.935306	-0.211131	0.381949	0.657782	-0.323184	0.269747	0.603335	-0.496331	0.0180898	0.0374168
2010107E04Rik	-0.817943	0.121861	0.955693	-0.386935	0.39402	0.960134	-1.34269	0.00473663	0.0350679	-2.01436	0.0206442	0.17112	-1.97132	0.00375863	0.0333935	-1.49817	0.00629186	0.0606694	-2.47482	3.44896e-06	0.00100273	-1.60962	2.39207e-05	0.000108316
2010107H07Rik	-0.0317861	0.969147	0.999247	0.306212	0.406522	0.960673	-0.334577	0.402833	0.573833	0.26807	0.507945	0.707527	0.2284	0.522942	0.71182	-0.113871	0.645007	0.834262	0.144194	0.624425	0.85103	0.199355	0.405126	0.504637
2010109K11Rik	-0.218002	0.592769	0.961274	-0.100147	0.785847	0.996172	-0.405529	0.225264	0.39391	0.893663	0.0566669	0.237716	-0.448001	0.246477	0.458241	0.0185217	0.948627	0.981169	-0.0635722	0.867445	0.960502	0.242922	0.310909	0.407575
2010111I01Rik	-0.558268	0.228069	0.955693	-0.430981	0.340857	0.960134	-0.408537	0.287306	0.461605	0.547949	0.200175	0.427866	-0.297228	0.434716	0.640271	-0.105335	0.700662	0.866402	-0.133352	0.688998	0.880833	-0.0112031	0.961877	0.97392
2010204K13Rik	-0.361765	0.548104	0.957503	-0.105532	0.835787	0.996172	-1.29619	0.00505716	0.0366525	-1.69475	0.0517236	0.230152	-1.28157	0.0841488	0.238852	-0.865736	0.0200662	0.125555	-0.580323	0.287912	0.618655	-0.113915	0.688111	0.762022
2010305A19Rik	0.576281	0.172476	0.955693	0.181466	0.641082	0.989904	0.746698	0.0438047	0.138828	0.127954	0.728462	0.8553	0.216837	0.523234	0.71201	0.117235	0.610364	0.815634	-0.169312	0.536446	0.804226	0.098844	0.606837	0.693171
2010321M09Rik	-0.0420031	0.949609	0.998256	-0.00646777	1	1	0.384905	0.257685	0.430193	0.114725	0.741474	0.862763	0.0897992	0.779546	0.88478	0.035652	0.861363	0.944485	0.157177	0.541365	0.808071	-0.169849	0.34421	0.442113
2200002D01Rik	0.936229	0.10154	0.955693	-0.201404	0.787145	0.996172	0.348926	0.47708	0.637537	1.51346	0.00263757	0.0776487	1.50562	0.00122929	0.0153929	0.0722425	0.808868	0.921061	1.10881	0.00429033	0.0797976	0.870104	0.00183334	0.00511939
2210009G21Rik	0.348472	0.517893	0.956934	0.0965353	0.831066	0.996172	0.5936	0.216551	0.384757	-0.813604	0.240588	0.470812	0.360745	0.506058	0.698252	0.761788	0.00771874	0.0695237	-0.0492391	0.929342	0.981442	-0.404427	0.145424	0.217819
2210012G02Rik	-0.116726	0.795963	0.978114	0.154731	0.642989	0.989904	0.0716716	0.817895	0.886261	0.670691	0.108409	0.316349	0.618439	0.0955421	0.257796	0.559428	0.019441	0.12311	0.347504	0.245339	0.578872	1.11219	2.83946e-08	2.41997e-07
2210016F16Rik	-0.159789	0.691038	0.971177	-0.192843	0.599535	0.986681	-0.452535	0.193623	0.358217	-0.555241	0.134248	0.348361	0.080501	0.790893	0.891193	-0.547616	0.0158885	0.108492	-0.606182	0.0245323	0.191725	0.37492	0.0360709	0.0677304
2210016L21Rik	0.541771	0.269395	0.955693	-0.237148	0.646725	0.989904	1.25001	0.00213814	0.0211063	0.611972	0.0933422	0.294889	0.657634	0.0563244	0.187748	0.514891	0.0162938	0.110248	0.601058	0.0252897	0.194897	0.925499	7.49341e-07	4.87829e-06
2210018M11Rik	0.201679	0.472122	0.955693	0.344179	0.170129	0.881733	0.434033	0.0778236	0.199661	-0.348045	0.413474	0.632838	0.104386	0.784658	0.887051	0.160408	0.489584	0.740759	0.258907	0.393462	0.705255	-0.719923	0.0001984	0.000721324
2210023G05Rik	0.734706	0.232342	0.955693	0.06806	0.870644	0.996527	0.451925	0.408429	0.578621	-1.15719	0.0174357	0.160514	-1.03078	0.0124346	0.0749381	-1.09101	0.000306255	0.00762201	-0.883562	0.0169395	0.159066	-0.339724	0.195966	0.279033
2210408I21Rik	0.0176979	0.947661	0.997663	-0.0457133	0.968081	0.998839	0.276093	0.458448	0.622152	-1.2913	0.044972	0.220273	-2.3977	0.000109899	0.00272504	-0.365822	0.350443	0.632951	-0.356613	0.493583	0.782952	-1.07935	0.000276888	0.000968574
2210411K11Rik	-0.267637	0.556297	0.957503	-0.0937475	0.856284	0.996527	-0.683075	0.0567121	0.16325	1.01045	0.017488	0.160553	-1.31295	0.000838002	0.0117133	-0.282962	0.197626	0.470973	-0.129406	0.723142	0.897744	0.344598	0.140478	0.21149
2300009A05Rik	-1.08141	0.0963967	0.955693	-0.932148	0.112875	0.816889	-1.58373	0.00522879	0.0374342	0.720196	0.130654	0.344399	-0.106747	0.799416	0.897129	0.114768	0.687946	0.859386	-0.00242122	0.995309	1	1.13337	7.67137e-05	0.000310086
2310001A20Rik	-0.153218	0.711545	0.972787	-0.137794	0.720511	0.9929	-0.194559	0.572815	0.716916	-0.92958	0.0211062	0.171881	-0.807672	0.0239442	0.11324	-0.19561	0.377074	0.655239	-0.597407	0.033573	0.225477	0.29961	0.0985322	0.157444
2310002J21Rik	-0.764974	0.040516	0.955693	-0.522407	0.125324	0.830956	-1.22632	0.000498741	0.00809157	-1.69841	0.00844646	0.128304	-1.03087	0.0444847	0.165002	-0.813433	0.0272636	0.152418	-1.07835	0.024574	0.1919	-0.981722	1.94594e-05	8.9578e-05
2310003C23Rik	0.0522735	0.846928	0.984087	-0.137297	0.6117	0.986881	-0.411485	0.119317	0.259614	-0.626679	0.117389	0.327796	-0.521444	0.120985	0.2985	0.148048	0.455484	0.71457	0.0155354	0.949919	0.987828	0.0807262	0.649768	0.730834
2310003F16Rik	-0.436309	0.237775	0.955693	-0.2665	0.391675	0.960134	-1.35758	2.67795e-05	0.00112294	0.219111	0.553182	0.740357	0.247525	0.490109	0.683574	0.014904	0.957914	0.984604	-0.223836	0.46231	0.762629	0.682283	0.0146972	0.0311749
2310003L22Rik	0.391991	0.299758	0.955693	0.114737	0.728172	0.9929	0.32721	0.327001	0.501499	-0.662287	0.126217	0.339343	-0.344121	0.358492	0.572716	-0.442666	0.122861	0.360527	-0.805503	0.0128618	0.140747	0.33082	0.131645	0.200307
2310004I24Rik	-0.370574	0.381703	0.955693	0.143212	0.69899	0.991307	0.713263	0.0260956	0.101297	-1.50193	0.0101812	0.135374	-1.4266	0.0011184	0.0142732	-0.525151	0.0870253	0.29959	-1.20243	0.000691121	0.0270772	-0.517015	0.0459024	0.0829601
2310004N24Rik	-0.307732	0.498848	0.955693	-0.25547	0.542046	0.979378	-0.585831	0.133065	0.278697	0.0985963	0.789275	0.891968	0.455618	0.195968	0.398857	-0.0608913	0.781635	0.908604	0.282472	0.312565	0.639614	0.58284	0.00246974	0.00662402
2310007H09Rik	-0.584654	0.418531	0.955693	-1.07686	0.1444	0.854977	-1.32485	0.0447883	0.140695	-0.22232	0.626852	0.791481	-0.398772	0.300438	0.515705	-0.152135	0.573126	0.794879	0.0602337	0.864609	0.959395	0.866002	0.000168897	0.000625686
2310008H04Rik	0.133744	0.67281	0.967922	-0.0577483	0.871114	0.996527	-0.462169	0.128569	0.272831	-0.325821	0.395578	0.617143	-0.456911	0.173601	0.368312	0.196071	0.334857	0.618636	-0.1167	0.644549	0.858106	-0.274501	0.128896	0.197147
2310008H09Rik	0.0882703	0.726129	0.973017	0.412089	0.0647055	0.68792	-0.0232533	0.925562	0.955272	-0.165408	0.615155	0.783958	-0.294149	0.341471	0.555978	-0.29024	0.183302	0.453202	-0.0280057	0.913321	0.974965	-0.546809	0.00637054	0.0150054
2310009B15Rik	-0.75758	0.0929042	0.955693	-0.621906	0.124464	0.830956	-1.5614	0.000176346	0.00419031	0.593727	0.196578	0.423634	0.619968	0.134182	0.317783	-0.0285834	0.922864	0.971333	-0.210588	0.527265	0.798984	0.970769	4.15203e-05	0.000177462
2310011J03Rik	0.653749	0.386941	0.955693	-0.413841	0.638474	0.989904	0.994825	0.165773	0.32348	0.0662776	0.85193	0.924963	-0.53015	0.116309	0.291577	-0.189246	0.382267	0.657986	-0.106095	0.713133	0.893027	0.175665	0.376842	0.476725
2310014H01Rik	0.426542	0.224043	0.955693	-0.240557	0.51111	0.975024	0.530611	0.0897628	0.217439	0.744775	0.0237566	0.177198	0.943006	0.00287373	0.0273141	-0.286094	0.148919	0.402876	0.619193	0.0100506	0.126494	-0.539053	0.00400835	0.0100309
2310014L17Rik	-0.092043	0.884889	0.987542	0.231571	0.60262	0.986881	-0.124182	0.770208	0.855596	-0.707184	0.156601	0.375281	0.258495	0.555623	0.736306	-0.869306	0.0206323	0.12751	-0.97007	0.0159221	0.155027	-1.60104	1.56543e-06	9.46275e-06
2310016C08Rik	-0.00061683	1	1	-0.0313701	0.955765	0.998173	-0.259781	0.431416	0.597824	-0.224215	0.546046	0.735132	-0.719283	0.0370286	0.148233	0.0464685	0.830767	0.930324	0.0228402	0.939345	0.984094	1.0786	3.36757e-08	2.83615e-07
2310016E02Rik	0.525769	0.175518	0.955693	0.350171	0.314597	0.955127	0.613963	0.0687744	0.185093	-0.683273	0.0540387	0.233522	-0.746684	0.0172664	0.0927943	-0.516859	0.0079081	0.0708463	-0.445819	0.0606003	0.29955	-0.0553837	0.759847	0.821145
2310016M24Rik	-0.537478	0.184867	0.955693	-0.734236	0.0510699	0.650099	-0.745907	0.0325043	0.114945	0.103922	0.780432	0.885685	0.111337	0.763278	0.876483	-0.690942	0.00372948	0.0434816	-0.521304	0.0813565	0.345065	-0.0576895	0.797943	0.851981
2310021P13Rik	0.429502	0.23813	0.955693	0.0605052	0.841596	0.996407	0.244433	0.479695	0.639499	0.737113	0.0543214	0.233877	0.40653	0.253395	0.465463	0.222923	0.37218	0.650871	0.480868	0.11314	0.407935	0.0487214	0.83689	0.881123
2310022A10Rik	0.0872505	0.859699	0.986037	0.0835171	0.845675	0.996527	0.622575	0.147808	0.299032	0.983163	0.00625276	0.112237	1.00101	0.002138	0.0224009	0.460112	0.0223167	0.133366	0.757231	0.00381441	0.0749366	0.248381	0.19663	0.279779
2310022B05Rik	0.080921	0.775609	0.974201	-0.221424	0.438602	0.96615	-0.717012	0.00827064	0.0497092	0.724714	0.0328511	0.19827	0.127288	0.676518	0.82335	-0.0200475	0.916767	0.968491	0.488033	0.0493904	0.271436	-0.308691	0.0768644	0.128043
2310028O11Rik	-0.588319	0.146034	0.955693	-0.308018	0.381633	0.960134	-0.894452	0.0172152	0.0780327	-0.515475	0.146409	0.362112	-0.434726	0.214847	0.420821	-0.56109	0.0219994	0.132579	-0.723581	0.00794988	0.111059	-0.278931	0.24185	0.332598
2310030N02Rik	-0.0422353	0.926428	0.992992	-0.140483	0.685664	0.991213	-0.244282	0.456179	0.61998	-1.28805	0.0255164	0.180991	-1.32903	0.029216	0.127214	-0.668413	0.0277178	0.153339	-1.04192	0.00314529	0.0664653	0.0654273	0.769837	0.828442
2310033P09Rik	0.75199	0.258232	0.955693	0.0453124	0.908083	0.996527	0.449815	0.448559	0.613235	0.87378	0.023641	0.177036	0.136844	0.697479	0.836138	0.454084	0.036592	0.180876	0.593773	0.0411351	0.247123	0.184272	0.328745	0.426253
2310035C23Rik	-0.167816	0.608275	0.96167	-0.200123	0.501224	0.974559	0.00491738	0.984774	0.992331	0.160475	0.679055	0.822206	-0.704309	0.0525965	0.179978	0.239404	0.338239	0.620976	-0.228268	0.43862	0.744243	-0.37943	0.0921093	0.148987
2310036O22Rik	0.0805511	0.760045	0.974198	0.000390228	0.988128	1	0.155885	0.504875	0.661067	0.947446	0.0150551	0.154526	-0.00663212	0.984692	0.994298	0.24874	0.330086	0.614716	0.216511	0.456278	0.758098	0.885015	0.000438117	0.0014459
2310037I24Rik	0.459003	0.353289	0.955693	0.145021	0.735211	0.9929	1.06199	0.0188268	0.0822282	-0.0806286	0.793781	0.894081	-0.202769	0.478962	0.675315	0.166613	0.379417	0.656547	0.107504	0.643126	0.857231	0.27572	0.118092	0.183211
2310039H08Rik	0.430503	0.373046	0.955693	-0.434192	0.376905	0.960134	-0.203094	0.637475	0.765215	0.917305	0.0456008	0.221243	0.828712	0.0356504	0.144689	-0.0727656	0.778266	0.906644	-0.115194	0.735257	0.904681	1.16851	1.31545e-06	8.05412e-06
2310044G17Rik	0.069048	0.823271	0.981006	-0.298904	0.365109	0.960134	0.133041	0.640958	0.767622	0.126718	0.718054	0.84847	-0.165333	0.61352	0.780887	0.22003	0.297153	0.582059	0.183974	0.475433	0.770625	0.0931239	0.625699	0.7096
2310044H10Rik	0.294842	0.508326	0.955693	-0.0416807	0.941408	0.997148	0.997172	0.0149081	0.0713929	0.29998	0.368582	0.594651	0.189617	0.528614	0.716206	-0.0251869	0.897759	0.961189	0.514526	0.0482897	0.268336	0.339592	0.0729439	0.122679
2310047B19Rik	0.569383	0.341021	0.955693	0.19587	0.714526	0.992764	0.337679	0.519346	0.673301	-0.530593	0.224811	0.453898	-0.707323	0.0579871	0.191246	0.362438	0.166452	0.428806	0.159374	0.609304	0.844798	1.19188	4.4479e-09	4.39941e-08
2310047M10Rik	-0.12309	0.815091	0.981006	-0.385979	0.407266	0.960673	-0.342635	0.394754	0.566351	1.07819	0.00868097	0.128634	0.478298	0.200524	0.403473	-0.0515935	0.826602	0.928603	-0.0112702	0.97117	0.994552	0.300089	0.144451	0.21659
2310057M21Rik	0.404792	0.262548	0.955693	0.306346	0.349721	0.960134	0.270205	0.380066	0.553489	-0.454559	0.293688	0.523113	-0.114575	0.76016	0.874506	-0.0839745	0.74151	0.887792	0.0220721	0.94427	0.986069	0.351677	0.0956431	0.153603
2310061C15Rik	-0.14732	0.665488	0.967797	-0.0254468	0.947894	0.997148	-0.101458	0.738311	0.836171	-1.14649	0.0105499	0.136551	-0.707385	0.032994	0.137774	-0.7125	0.0013884	0.0221429	-0.854949	0.0142953	0.148648	-0.41941	0.0312747	0.0600002
2310061F22Rik	0.298377	0.45621	0.955693	-0.0789985	0.857741	0.996527	0.763955	0.0412714	0.133367	0.533429	0.186651	0.413679	0.226334	0.55902	0.738747	-0.17964	0.495681	0.744131	-0.158399	0.615322	0.846495	-0.0459161	0.84736	0.889192
2310061I04Rik	0.110099	0.780251	0.974337	-0.169931	0.700118	0.991514	0.617093	0.107167	0.242743	0.565748	0.0969172	0.30001	0.277193	0.377294	0.59028	0.166163	0.414674	0.683024	0.196953	0.42619	0.7341	0.951785	5.28489e-07	3.57097e-06
2310061J03Rik	-0.595841	0.241365	0.955693	-1.8079	0.000544882	0.0438542	-0.435241	0.29244	0.466894	1.55089	0.00361011	0.087237	0.128409	0.747836	0.867031	0.747042	0.00704594	0.0654645	0.220283	0.566028	0.821667	0.889802	0.000224383	0.000803497
2310065K24Rik	0.157925	0.596004	0.961274	0.31226	0.239675	0.93973	0.622103	0.0166916	0.0765895	-0.457953	0.187475	0.414593	-0.219774	0.47571	0.672463	0.117164	0.546836	0.778742	-0.143546	0.562195	0.819799	0.905341	1.6526e-07	1.22442e-06
2310067B10Rik	0.270832	0.608207	0.96167	-0.436112	0.407359	0.960673	0.790395	0.112725	0.250912	0.49602	0.171863	0.395297	0.470804	0.165032	0.35914	-0.161965	0.505735	0.751749	0.096213	0.733674	0.90358	-0.477393	0.0345196	0.0652102
2310079F23Rik	0.477097	0.417768	0.955693	0.617408	0.269882	0.947959	1.23226	0.0195424	0.0840991	0.515695	0.176787	0.40076	0.980644	0.00475111	0.0390256	-0.154539	0.520411	0.761965	-0.0905132	0.759818	0.916188	0.0200523	0.921425	0.945197
2310079N02Rik	0.240296	0.657939	0.966202	0.172034	0.730096	0.9929	0.279347	0.53535	0.686558	0.201914	0.61746	0.7851	-0.0303038	0.935585	0.969487	0.0494096	0.841962	0.935618	-0.135781	0.659281	0.86425	0.948395	1.88479e-05	8.70037e-05
2400001E08Rik	0.518658	0.306729	0.955693	-0.333909	0.508237	0.975024	0.718923	0.108287	0.244117	0.00979886	0.976718	0.98991	0.272667	0.392532	0.6038	-0.239168	0.254706	0.53628	0.0861716	0.74109	0.907101	0.204566	0.320497	0.41758
2400003C14Rik	0.0764864	0.778522	0.974201	0.175627	0.463981	0.967931	0.32216	0.182588	0.344011	-0.406199	0.299261	0.528856	0.328023	0.300961	0.516009	0.0342585	0.894356	0.959779	0.125671	0.693908	0.883168	-0.24746	0.217142	0.304193
2410001C21Rik	0.452308	0.283318	0.955693	0.14937	0.684416	0.991213	1.02811	0.00576239	0.0396579	0.655708	0.0521191	0.230562	0.700624	0.0431794	0.161943	0.350186	0.107687	0.336795	0.387872	0.130214	0.438588	0.751246	9.70671e-05	0.0003832
2410002I01Rik	-0.0320343	1	1	0.258704	0.612693	0.986881	1.13241	0.0185233	0.0813299	0.770462	0.0866478	0.287386	0.804583	0.041052	0.157155	0.109917	0.688111	0.859386	0.231808	0.494584	0.782952	0.17984	0.481855	0.579457
2410002O22Rik	-0.474188	0.171566	0.955693	-0.28613	0.368444	0.960134	-0.04545	0.889315	0.934151	-0.599537	0.186263	0.41309	-0.654232	0.0711231	0.216059	-0.223719	0.373597	0.652291	-0.0622694	0.831338	0.945635	-0.280998	0.291038	0.386142
2410003K15Rik	-0.74203	0.104633	0.955693	-0.631682	0.125559	0.830956	-1.31595	0.00206685	0.0206478	0.746862	0.13251	0.345829	-1.29716	0.0007007	0.0104241	-0.206078	0.408516	0.678029	-0.49363	0.142368	0.456274	0.3575	0.109361	0.171932
2410004B18Rik	-0.522249	0.241779	0.955693	-0.432758	0.298989	0.953327	-0.537046	0.193563	0.358217	1.21566	0.00755501	0.122005	1.40075	0.000967063	0.0129504	0.249836	0.416763	0.684771	0.609993	0.0914527	0.366797	0.831954	0.00272682	0.00720893
2410016O06Rik	0.572486	0.193051	0.955693	0.511432	0.218481	0.929295	0.245321	0.521597	0.674698	0.465963	0.223452	0.452629	0.238424	0.48951	0.683245	0.271497	0.224042	0.499736	-0.162394	0.567682	0.822633	0.46055	0.0166196	0.0346778
2410017P07Rik	-0.0184122	0.978779	1	-0.480261	0.184705	0.893789	-0.30564	0.382194	0.555615	-1.02159	0.119241	0.33027	-0.223591	0.665993	0.815135	0.477885	0.138372	0.386496	-0.166704	0.681661	0.876672	0.260736	0.341726	0.439628
2410022L05Rik	0.533998	0.330472	0.955693	0.329515	0.529172	0.97863	0.630657	0.192332	0.356793	-0.457203	0.215422	0.445025	-0.147495	0.654894	0.807977	-0.456727	0.0366919	0.181011	-0.690687	0.0133477	0.14448	0.36271	0.059546	0.103268
2410025L10Rik	-0.239746	0.558518	0.957503	-0.274742	0.448751	0.966629	0.38797	0.233105	0.403048	1.51196	0.000480312	0.0342394	0.548013	0.133913	0.317783	0.730083	0.00182702	0.0269728	0.719608	0.0137458	0.146506	0.87601	0.000232466	0.000829169
2410042D21Rik	-0.0699436	0.847826	0.984087	-0.0552776	0.865991	0.996527	-0.397323	0.179253	0.340425	0.362514	0.48323	0.690032	-0.509699	0.271018	0.483857	-0.136679	0.692617	0.862513	-0.254649	0.513019	0.792766	0.467117	0.126767	0.194636
2410089E03Rik	0.0544875	0.825318	0.981006	0.301404	0.198092	0.913149	0.130326	0.588719	0.729956	0.430258	0.17147	0.394666	0.711393	0.0144404	0.0828985	0.522804	0.00619887	0.0600502	0.492096	0.0368929	0.235116	-0.410332	0.0218095	0.0438828
2410091C18Rik	0.0690464	0.827388	0.981006	0.0791953	0.792678	0.996172	0.0929901	0.756561	0.847482	-1.09736	0.0296115	0.191585	-0.634263	0.120228	0.297219	0.0607128	0.791301	0.913821	-0.18799	0.527976	0.79923	0.162109	0.419385	0.518387
2410127L17Rik	-0.505468	0.124811	0.955693	-0.178526	0.534576	0.979378	-0.791551	0.00844147	0.0503046	0.261303	0.541536	0.731633	-2.0312	5.06525e-06	0.000276236	-0.250106	0.401577	0.672891	-0.724707	0.0655604	0.310386	0.287263	0.297281	0.392702
2410129H14Rik	-0.649312	0.0905451	0.955693	-0.471648	0.191395	0.907855	-0.872374	0.0139696	0.0686862	-0.386955	0.326354	0.55514	-1.3835	0.000169545	0.00376851	-0.19735	0.397457	0.670873	-0.312209	0.265601	0.59957	0.653426	0.000856714	0.0026075
2410131K14Rik	0.325593	0.454341	0.955693	0.194348	0.628479	0.987954	1.15447	0.00254098	0.0233939	0.136452	0.709159	0.84295	0.622455	0.0539453	0.182934	0.289772	0.177138	0.444818	0.0460606	0.871194	0.962409	0.092209	0.621003	0.705396
2500003M10Rik	0.09909	0.696502	0.971446	-0.0660793	0.795743	0.996172	-0.00958646	0.975565	0.986238	0.171021	0.601852	0.77513	-0.0480775	0.872615	0.938653	-0.0786993	0.675744	0.852739	0.0496881	0.840474	0.949398	0.0365553	0.83442	0.879079
2510002D24Rik	-0.177931	0.736634	0.974136	-0.523626	0.29178	0.949068	-0.684556	0.11605	0.254955	-0.352734	0.40104	0.622246	-0.643535	0.0878279	0.245007	-0.374931	0.142527	0.393478	-0.545701	0.0813954	0.345083	0.198899	0.394258	0.493874
2510003E04Rik	0.0675333	0.804335	0.979657	0.19157	0.462534	0.967931	0.536617	0.0397305	0.130345	0.145403	0.6724	0.818061	0.209254	0.515891	0.706061	0.148232	0.511172	0.756744	0.0648131	0.805218	0.935951	0.278311	0.171844	0.249419
2510006D16Rik	0.365154	0.344235	0.955693	-0.063366	0.886106	0.996527	0.511006	0.151223	0.303907	0.93989	0.0266232	0.18405	0.602338	0.105251	0.274056	-0.330239	0.102999	0.327889	-0.151464	0.621138	0.849776	0.108288	0.549305	0.641321
2510009E07Rik	-0.147	0.764527	0.974201	-0.359981	0.351945	0.960134	-0.713581	0.0506718	0.152551	0.566808	0.195527	0.422463	0.375802	0.349298	0.563712	0.11346	0.701562	0.86664	0.194552	0.569519	0.8235	-0.462814	0.0823844	0.135698
2510012J08Rik	0.128072	0.664108	0.967797	0.0632541	0.812242	0.996172	0.355757	0.205472	0.372068	1.00826	0.00677093	0.115871	1.05201	0.00168779	0.0191628	0.284126	0.166656	0.429105	0.16608	0.537193	0.804982	0.85441	1.85686e-06	1.09849e-05
2510039O18Rik	0.358793	0.333409	0.955693	-0.0499302	0.908111	0.996527	0.657316	0.0432971	0.137815	0.576006	0.133712	0.347573	0.286736	0.436101	0.640891	-0.534365	0.0277995	0.153706	-0.136494	0.650521	0.86094	-0.354728	0.106635	0.168363
2510049I19Rik	-0.10289	0.747322	0.974136	0.151592	0.541722	0.979378	-0.0705991	0.78815	0.866544	0.54321	0.106296	0.313486	0.349907	0.251893	0.463732	0.0798492	0.700227	0.866402	0.274866	0.291696	0.621765	0.564118	0.00367187	0.00929847
2510049J12Rik	1.51476	0.0237168	0.955693	0.941911	0.161721	0.869128	0.462963	0.473998	0.634991	-0.274698	0.70757	0.842145	0.768845	0.148217	0.336873	-0.171491	0.761529	0.897948	0.311441	0.58623	0.830718	-0.476618	0.340017	0.438073
2610001J05Rik	-0.421629	0.27045	0.955693	-0.572958	0.107384	0.811367	-0.889693	0.0110049	0.0596604	-0.524556	0.147383	0.36354	-0.0289462	0.934012	0.968462	-0.579569	0.0131643	0.0970312	0.0396569	0.883874	0.964874	-0.455552	0.0318309	0.0609034
2610002D18Rik	0.0386984	0.911497	0.991053	0.211643	0.622004	0.986881	-0.0245777	0.973903	0.985156	0.319607	0.449319	0.664069	-0.330879	0.389428	0.601159	0.227475	0.397989	0.671111	0.330483	0.328111	0.653734	-0.279552	0.293429	0.388591
2610002I17Rik	0.704759	0.173396	0.955693	0.409417	0.404563	0.960134	1.19764	0.00880943	0.0515649	-0.356865	0.350302	0.578044	-0.273063	0.439133	0.643169	-0.249014	0.284452	0.570046	-0.629938	0.0320212	0.220698	0.0317504	0.875478	0.910771
2610002J02Rik	0.0519707	0.894831	0.98914	-1.0591	0.0296205	0.528222	0.0635545	0.85414	0.911594	0.413766	0.266109	0.494741	0.697875	0.0444972	0.165002	0.128688	0.566771	0.791226	0.124137	0.656927	0.863376	0.562967	0.00712055	0.0165581
2610002M06Rik	-0.215322	0.534256	0.957503	-0.378568	0.231886	0.933782	-0.363186	0.237293	0.408519	0.351249	0.344182	0.571822	-1.11051	0.00349138	0.0316104	-0.256216	0.282357	0.567803	0.0784573	0.798326	0.932939	0.625234	0.00595121	0.0141379
2610008E11Rik	-0.810702	0.0455524	0.955693	-1.42843	0.000252711	0.0259681	-0.66622	0.0726869	0.191659	-0.285129	0.543451	0.73292	0.0310187	0.948243	0.97642	1.10014	5.01878e-05	0.00191523	0.13713	0.695145	0.883652	0.613797	0.00949072	0.0212631
2610014I16Rik	0.213915	0.649915	0.963896	-0.448205	0.317724	0.955127	-0.812395	0.047806	0.146621	0.811721	0.0655856	0.253246	-1.19736	0.00226775	0.0231887	0.345975	0.195212	0.468648	0.413655	0.204767	0.538634	0.442415	0.078311	0.130041
2610020H08Rik	-0.167702	0.760194	0.974198	0.418709	0.332115	0.958807	0.130767	0.738643	0.836358	-0.149238	0.756252	0.871568	-0.0820937	0.84907	0.926393	0.10221	0.739486	0.886388	0.0191953	0.966904	0.993326	0.986574	8.2334e-05	0.000330457
2610021K21Rik	-1.10392	0.111744	0.955693	-1.0955	0.0851594	0.748059	-1.70974	0.00410213	0.032059	-0.0545179	0.918858	0.962441	-0.809701	0.0734789	0.220184	0.225036	0.494367	0.743513	-0.358051	0.377939	0.694756	0.669647	0.0211767	0.0428515
2610024G14Rik	0.356307	0.314291	0.955693	0.332402	0.295679	0.949068	0.0575662	0.849105	0.908475	0.269868	0.425503	0.643992	-0.028151	0.927467	0.966037	0.0500785	0.807428	0.920509	-0.132178	0.601587	0.839933	0.433583	0.0188744	0.0387585
2610027L16Rik	0.371548	0.255125	0.955693	0.42293	0.156805	0.862767	0.21016	0.479108	0.639494	-0.136902	0.703066	0.839506	-0.333742	0.317521	0.532837	-0.0855227	0.711716	0.871781	-0.221014	0.416851	0.726288	-0.0140942	0.948361	0.964009
2610028A01Rik	-0.114235	0.745985	0.974136	-0.0868911	0.773867	0.995587	-0.513813	0.0905448	0.218481	-0.643095	0.172843	0.396455	-0.863876	0.0238298	0.112979	0.402616	0.115113	0.348023	0.0743282	0.812129	0.937902	1.07629	2.97064e-06	1.66744e-05
2610029G23Rik	-0.0598905	0.842382	0.98262	0.104476	0.643973	0.989904	-0.536148	0.0554498	0.161245	-0.014546	0.969076	0.987293	-0.297092	0.426158	0.632143	-0.0302584	0.908774	0.964539	0.212579	0.465162	0.764625	0.380729	0.109292	0.171878
2610029I01Rik	-0.298623	0.511764	0.955693	-0.139048	0.75537	0.9929	-0.335487	0.390218	0.562934	-0.238612	0.633666	0.795671	0.00687198	0.990923	0.997117	-0.0537001	0.871283	0.948762	-0.183677	0.612706	0.846305	-0.76685	0.00579093	0.0138064
2610030H06Rik	-0.174986	0.54078	0.957503	-0.22211	0.38899	0.960134	-0.588448	0.0235023	0.0948841	-0.13071	0.722087	0.851311	-0.903683	0.0107503	0.0679006	-0.268899	0.395708	0.669351	-0.995603	0.00219986	0.0529027	-0.220901	0.377863	0.477593
2610034B18Rik	0.60805	0.186125	0.955693	-0.165015	0.746415	0.9929	0.83934	0.0385481	0.127764	0.176084	0.602574	0.77536	0.227536	0.471547	0.669051	-0.00467167	0.983701	0.99628	0.0175384	0.94548	0.986295	-0.0437085	0.814167	0.863668
2610036D13Rik	0.12292	0.745974	0.974136	-0.634102	0.109775	0.81454	0.429615	0.180493	0.341612	-0.355025	0.34979	0.577391	-0.143848	0.691307	0.832613	-0.124123	0.578727	0.798079	-0.138926	0.60865	0.84435	-0.410137	0.034978	0.0659514
2610036L11Rik	-0.67094	0.184263	0.955693	-0.814468	0.0674894	0.692234	-1.38934	0.00241809	0.0227023	0.448421	0.307596	0.537526	-0.189069	0.618275	0.784837	-0.531447	0.0340337	0.173403	-0.309579	0.382105	0.697474	0.415666	0.070983	0.119846
2610039C10Rik	-0.941318	0.0616997	0.955693	-0.68873	0.133919	0.846325	-0.693904	0.129893	0.274589	0.112512	0.794012	0.894081	0.203201	0.590198	0.763471	-0.0441798	0.876273	0.951245	0.508171	0.116161	0.413581	0.0233197	0.919464	0.94357
2610044O15Rik	-0.205167	0.64063	0.962838	-0.381885	0.332447	0.958807	0.0182048	0.961328	0.977725	-1.04186	0.130126	0.344045	-0.514485	0.303017	0.518164	0.0781727	0.811108	0.921322	-0.197053	0.679041	0.874204	-0.398492	0.104666	0.16591
2610101N10Rik	-0.351352	0.274145	0.955693	-0.253645	0.379221	0.960134	-0.417745	0.140529	0.289256	-1.11424	0.0483638	0.225529	-1.22187	0.00765636	0.0537345	-0.0615844	0.876328	0.951245	-0.331935	0.446345	0.750395	-1.24703	5.74736e-05	0.000238795
2610110G12Rik	0.496233	0.262381	0.955693	0.321314	0.440052	0.966496	0.514792	0.168743	0.326954	1.18296	0.00500178	0.101048	1.373	0.000264566	0.00523884	0.48872	0.0347164	0.175695	0.760208	0.0134436	0.144855	0.99847	5.64694e-06	2.96988e-05
2610204M08Rik	0.581189	0.334957	0.955693	-0.0190215	0.999019	1	1.36016	0.0128862	0.0656816	0.815221	0.0285494	0.188691	0.202668	0.541602	0.726113	0.0586679	0.783382	0.91011	0.680515	0.0130429	0.142229	-1.02507	1.02392e-07	7.90308e-07
2610209A20Rik	0.0613258	0.886028	0.987724	-0.702473	0.173172	0.88447	-0.613291	0.150299	0.302507	-0.714337	0.142138	0.356361	-1.95882	8.24867e-06	0.000407533	-0.6236	0.0431668	0.199078	-0.616597	0.0895698	0.362493	-0.700207	0.00700922	0.0163296
2610301B20Rik	0.0629821	0.826372	0.981006	-0.17659	0.552932	0.980133	-0.15184	0.60411	0.741971	-0.642069	0.13534	0.349575	-0.391999	0.28794	0.502162	-0.233792	0.3409	0.622886	-0.96487	0.00272672	0.0604726	-0.132171	0.539338	0.632428
2610301F02Rik	-0.156113	0.768467	0.974201	-0.13902	0.787779	0.996172	0.358458	0.372712	0.546768	-0.765727	0.23302	0.461876	-0.637935	0.189192	0.389951	0.137406	0.639192	0.831533	-0.227127	0.59823	0.837434	0.27719	0.245194	0.336178
2610301G19Rik	0.324383	0.420294	0.955693	-0.204774	0.621453	0.986881	0.535602	0.123918	0.266302	0.408555	0.23371	0.462783	-0.156759	0.624453	0.788725	0.119073	0.570895	0.793528	0.387171	0.125528	0.431394	-0.28867	0.115138	0.179531
2610305D13Rik	-0.760544	0.0697908	0.955693	-0.774971	0.0436587	0.610439	-1.13298	0.00521905	0.0373926	-0.0576559	0.947725	0.977419	0.440053	0.48686	0.681563	1.93552	4.07513e-06	0.000246484	1.27792	0.0169237	0.159066	1.79349	4.75725e-06	2.5457e-05
2610507B11Rik	0.206117	0.447231	0.955693	0.228256	0.352812	0.960134	-0.0740788	0.768256	0.85443	-0.324158	0.36721	0.59378	-0.125623	0.693424	0.833681	-0.316596	0.0924697	0.309576	-0.153173	0.550031	0.812268	-1.0658	3.19525e-09	3.25394e-08
2610528E23Rik	0.069553	0.864257	0.986037	-0.32767	0.522974	0.978125	0.440151	0.270891	0.444362	0.18583	0.676057	0.819613	0.207125	0.61416	0.781413	-0.234852	0.441653	0.703365	-0.157009	0.651202	0.861038	1.03557	0.000120809	0.000464436
2700007P21Rik	-0.105361	0.703598	0.972787	-0.489702	0.0414075	0.601524	-0.957916	0.000104478	0.00294545	0.360078	0.31193	0.541874	0.856362	0.0108583	0.0681543	1.12205	2.58831e-05	0.00108993	0.365158	0.213914	0.545581	0.50447	0.0426374	0.0780917
2700029M09Rik	-0.466948	0.148875	0.955693	-0.312678	0.280442	0.948861	-0.880138	0.00472364	0.0350298	-0.680149	0.166238	0.388539	-0.592707	0.203822	0.406504	-0.542054	0.171301	0.435802	-0.703351	0.0684927	0.317934	-0.28714	0.309035	0.405666
2700049A03Rik	-0.28443	0.431264	0.955693	-0.525474	0.113719	0.819329	0.0578504	0.843634	0.905027	-0.911773	0.0885061	0.289129	-0.709255	0.0993828	0.263916	-0.260862	0.315679	0.601148	-0.377199	0.301871	0.631435	-1.24795	1.36402e-09	1.48938e-08
2700050L05Rik	-0.0722585	0.859819	0.986037	0.486605	0.111097	0.81513	0.423329	0.147653	0.298901	-0.259356	0.554356	0.7413	0.652627	0.0746507	0.222592	-0.0813211	0.744881	0.889319	-0.590409	0.0792384	0.342005	-0.184089	0.391412	0.490802
2700060E02Rik	0.0871891	0.729352	0.973282	0.229581	0.318253	0.955127	0.0229178	0.920593	0.953562	0.583579	0.0909431	0.292273	-0.231907	0.468066	0.666454	-0.11335	0.622115	0.822103	-0.169002	0.538971	0.80691	0.817751	0.000168196	0.000624244
2700062C07Rik	0.0489009	0.88167	0.987001	0.00774048	0.968545	0.998839	0.100041	0.75	0.843951	-0.318095	0.4548	0.66906	-0.128624	0.736753	0.859343	0.583322	0.0312521	0.164202	0.20253	0.524087	0.7981	0.941316	0.000104186	0.000408234
2700078E11Rik	0.0809307	0.777625	0.974201	0.0385892	0.876102	0.996527	0.234682	0.379518	0.553014	0.565432	0.117789	0.328179	0.380706	0.239114	0.449325	-0.110354	0.660091	0.843173	-0.208827	0.453363	0.756328	-0.162817	0.450034	0.548425
2700078K21Rik	0.429166	0.371529	0.955693	0.598782	0.19508	0.910963	0.858144	0.0359467	0.122106	0.148135	0.696062	0.834438	0.342487	0.321051	0.535708	-0.0521726	0.814112	0.922555	-0.100203	0.712913	0.893027	0.470103	0.0141605	0.0302163
2700081O15Rik	0.296815	0.345289	0.955693	0.41845	0.144718	0.854977	0.106485	0.711997	0.817973	1.3324	0.000653729	0.0386048	0.541616	0.0974576	0.261389	-0.178142	0.419874	0.686904	0.122133	0.64477	0.858106	-0.291289	0.155707	0.2303
2700089E24Rik	-0.56037	0.0717097	0.955693	-0.597727	0.0351941	0.560187	-1.31487	7.7391e-06	0.00042909	0.438821	0.202245	0.430048	0.732762	0.0151446	0.0851931	0.440476	0.0282945	0.15513	-0.0528058	0.833188	0.946458	0.435189	0.0146225	0.0310523
2700094K13Rik	0.081317	0.789566	0.977712	-0.111571	0.717996	0.9929	-0.128885	0.680217	0.797057	-0.08413	0.811825	0.904221	-0.173167	0.611823	0.779322	-0.580116	0.00316997	0.0385808	-0.766399	0.0104521	0.12799	-0.0965117	0.630937	0.714403
2700097O09Rik	-0.55901	0.320135	0.955693	-0.67301	0.204462	0.917386	-0.643502	0.2	0.365368	-1.35423	0.0396639	0.211616	-0.751546	0.181942	0.37987	-0.40733	0.199589	0.473382	-1.35124	0.000232174	0.0147446	0.00654704	1	1
2700099C18Rik	-0.86892	0.0698803	0.955693	-0.642488	0.117974	0.822555	-0.8466	0.0598256	0.169061	-1.79363	0.00783983	0.124514	-1.64911	0.00346043	0.0314241	0.209489	0.568311	0.791953	-0.375854	0.461427	0.762328	0.16284	0.606072	0.692535
2810002N01Rik	-0.263945	0.488615	0.955693	-0.225131	0.53035	0.978715	-0.174477	0.640639	0.767622	0.731178	0.0720034	0.263139	0.687482	0.0726271	0.21878	0.396426	0.123854	0.362057	0.471423	0.118253	0.417756	1.39368	1.06448e-08	9.81838e-08
2810004N23Rik	0.0184942	0.939305	0.995356	-0.232737	0.422196	0.962619	-0.554722	0.0439268	0.139083	0.145997	0.675464	0.819336	0.335572	0.318741	0.533884	0.426519	0.0649279	0.25431	0.37437	0.180947	0.510415	1.12563	1.17983e-07	8.98145e-07
2810006K23Rik	0.240645	0.538932	0.957503	0.132962	0.712645	0.992764	0.475901	0.148736	0.300422	-0.0931866	0.825799	0.909856	0.311061	0.388679	0.600441	-0.019515	0.94098	0.978265	-0.0860056	0.781092	0.924268	0.192237	0.363792	0.463202
2810008D09Rik	-0.539541	0.28618	0.955693	-0.204759	0.636878	0.989904	-0.568226	0.209018	0.375676	-0.0398547	0.932547	0.969561	0.821896	0.0336667	0.139823	0.774017	0.00206442	0.029169	0.514291	0.115893	0.413298	0.726195	0.00242189	0.00650792
2810008M24Rik	-0.278583	0.397914	0.955693	0.029162	0.908008	0.996527	-0.370645	0.20576	0.372346	-1.14167	0.0986133	0.302539	0.531105	0.410967	0.61954	-0.256581	0.606668	0.814243	-0.481167	0.307644	0.637717	-0.547733	0.0713098	0.120317
2810021B07Rik	-0.486941	0.324645	0.955693	-0.443816	0.29222	0.949068	-1.48618	0.000243031	0.0051062	0.21193	0.642051	0.80141	-0.107522	0.785959	0.888177	0.367795	0.208211	0.481663	0.0930053	0.794764	0.931283	0.835355	0.00279387	0.00733952
2810021G02Rik	-0.768856	0.0833899	0.955693	-0.080566	0.847425	0.996527	-0.266203	0.519299	0.673301	-1.38699	0.0229701	0.175916	-1.54943	0.00254469	0.0250207	-0.382995	0.3362	0.619605	-0.384664	0.426657	0.734525	-0.878785	0.0183603	0.0378584
2810021J22Rik	-0.335399	0.460686	0.955693	-0.774258	0.0641886	0.68792	-0.479407	0.17892	0.34	-0.40243	0.415747	0.634968	0.133107	0.725432	0.854155	0.884209	0.000336805	0.00821837	0.0899471	0.786876	0.927506	-0.00192095	1	1
2810025M15Rik	-0.105152	0.776152	0.974201	-0.200604	0.544859	0.979378	-0.0321842	0.917274	0.951601	-0.457264	0.179049	0.403316	-0.800896	0.0163338	0.0892824	-0.573969	0.00429022	0.0471087	-0.427295	0.102083	0.389298	-0.120563	0.507401	0.604352
2810046L04Rik	0.0839915	0.812499	0.980824	0.378645	0.261795	0.945037	0.887108	0.00404906	0.0317436	0.529362	0.136819	0.350859	0.94059	0.00723862	0.051786	0.171752	0.482773	0.736034	0.668935	0.0165334	0.157446	0.251963	0.282352	0.377074
2810055F11Rik	-0.555099	0.171319	0.955693	-0.293506	0.433475	0.964137	-0.975461	0.0109928	0.0596567	0.136708	0.715955	0.847325	-0.339207	0.326184	0.541663	-0.258562	0.250953	0.532837	-0.593097	0.0336209	0.2255	-0.120465	0.544175	0.636782
2810403A07Rik	-0.23813	0.455019	0.955693	0.432177	0.0802022	0.733769	-0.578302	0.0358242	0.121856	0.182655	0.574371	0.756629	0.324847	0.296209	0.511606	-0.0679979	0.733052	0.881961	-0.264857	0.303313	0.632483	0.138246	0.434199	0.533592
2810407C02Rik	-0.393915	0.216674	0.955693	-0.305528	0.297951	0.950928	-0.668457	0.0196134	0.0841899	-0.782432	0.0249114	0.179631	-0.298868	0.325308	0.541005	-0.424802	0.0363789	0.180302	-0.491242	0.0740618	0.331475	-0.420969	0.0361604	0.0678619
2810408M09Rik	-0.202746	0.71104	0.972787	-0.126674	0.808064	0.996172	-0.434992	0.310712	0.485199	1.04086	0.00832934	0.1273	0.314745	0.384675	0.597518	0.242396	0.292861	0.578106	0.708057	0.022343	0.182176	0.78199	0.000295197	0.00102543
2810408P10Rik	-0.553741	0.183352	0.955693	-0.213774	0.562482	0.980133	-0.340833	0.380186	0.55355	-1.10505	0.0418788	0.215712	-0.670933	0.134314	0.317959	-0.0751202	0.786124	0.911453	-0.291983	0.435978	0.741578	-0.854048	0.000240078	0.00085175
2810417H13Rik	-0.220836	0.458257	0.955693	0.166161	0.483746	0.97191	-0.601013	0.0180644	0.0801137	-1.07575	0.0297204	0.191585	-0.241763	0.587019	0.761431	-0.482632	0.0698265	0.265159	-0.442058	0.191307	0.523799	-0.33227	0.185374	0.265885
2810422J05Rik	0.0976444	0.806296	0.979881	-0.150817	0.76187	0.993818	0.299099	0.427597	0.594187	0.199204	0.580484	0.760587	0.409992	0.233592	0.44211	0.31309	0.137989	0.386354	0.334612	0.210496	0.543952	0.694446	0.000201063	0.000729409
2810422O20Rik	-0.489368	0.375846	0.955693	-0.51294	0.343917	0.960134	0.182596	0.694729	0.806022	-1.6784	0.0148242	0.154526	-1.08465	0.0769072	0.226679	-0.184092	0.584005	0.80016	-0.563929	0.18551	0.515764	-0.14805	0.607509	0.693542
2810428I15Rik	0.777496	0.225306	0.955693	-0.243292	0.722648	0.9929	1.53457	0.00647665	0.0426797	0.791556	0.0504121	0.228345	0.500207	0.154658	0.344643	-0.419902	0.0605338	0.243502	-0.0965279	0.781135	0.924268	0.331586	0.146614	0.219339
2810432D09Rik	0.203497	0.616385	0.962615	-0.0854251	0.851656	0.996527	0.00353284	0.986725	0.993494	0.319128	0.439162	0.656408	0.151018	0.694581	0.834125	-0.400542	0.0728161	0.271002	-0.444571	0.149013	0.466484	0.024252	0.906451	0.93435
2810433K01Rik	0.929719	0.135639	0.955693	0.25344	0.65574	0.990689	0.904206	0.095645	0.226247	0.240456	0.62251	0.788001	-0.0541163	0.895202	0.94963	0.516988	0.0759975	0.276506	0.768049	0.0248144	0.193247	0.755985	0.00580131	0.0138278
2810452K22Rik	0.403574	0.243352	0.955693	0.243811	0.428315	0.962981	0.612599	0.0419227	0.134697	-1.09003	0.0105641	0.136551	-0.817664	0.0235704	0.112444	-0.782515	0.00173876	0.0260553	-0.926027	0.00210619	0.0518446	-0.611974	0.00101784	0.00304773
2810453I06Rik	0.304296	0.424778	0.955693	0.157332	0.651158	0.990305	0.248417	0.471472	0.632896	0.560206	0.120518	0.332074	0.823371	0.0108498	0.0681543	-0.0370144	0.860416	0.94365	-0.00895914	0.974175	0.995251	0.276711	0.120006	0.185828
2810474O19Rik	-0.521502	0.105068	0.955693	-0.449776	0.132751	0.845104	-0.881658	0.00336804	0.0281046	-0.140909	0.740444	0.86205	0.751297	0.0568067	0.188894	0.960778	0.000117172	0.00364293	0.224926	0.549989	0.812268	-0.594412	0.0092886	0.0208456
2900006K08Rik	-0.660254	0.199025	0.955693	-0.193988	0.694259	0.991213	-0.93216	0.0270467	0.103491	0.767335	0.161207	0.382059	0.0277188	0.97123	0.988223	0.845713	0.0220065	0.132579	0.390454	0.404799	0.715026	1.13892	0.00105996	0.00315304
2900010J23Rik	-0.41892	0.196859	0.955693	-0.299758	0.300693	0.95446	-0.914743	0.00186414	0.0192989	-0.466985	0.175734	0.399959	-0.202526	0.495084	0.687961	-0.419127	0.0496902	0.217028	-0.441712	0.086757	0.357488	0.0614195	0.741633	0.806543
2900010M23Rik	0.620441	0.216327	0.955693	-0.122871	0.823396	0.996172	0.748404	0.0991002	0.230918	0.344458	0.360176	0.587442	0.367343	0.32771	0.543189	-0.344822	0.17717	0.444818	-0.113367	0.709735	0.891783	0.34647	0.169375	0.24648
2900062L11Rik	-0.519628	0.289705	0.955693	-0.21417	0.629594	0.987954	-1.04864	0.0107997	0.0590257	1.44635	0.00804301	0.124831	-0.242429	0.543604	0.727529	0.122952	0.639044	0.831533	1.34157	0.00220754	0.0529597	0.426074	0.0676073	0.115061
2900064A13Rik	-0.544012	0.162636	0.955693	-0.256267	0.453562	0.967686	-0.769487	0.0215138	0.0896483	0.313394	0.443601	0.660304	0.895216	0.0124743	0.0750411	0.215989	0.404764	0.675822	-0.239549	0.4471	0.75081	1.24963	6.25973e-08	4.99777e-07
2900073G15Rik	-0.0488734	0.86228	0.986037	0.0489153	0.819381	0.996172	-0.40869	0.0722268	0.190845	0.632552	0.0778034	0.271991	0.353375	0.300638	0.515705	0.0620514	0.800991	0.91769	0.0411211	0.888585	0.966884	0.829413	0.00100529	0.00301465
2900092E17Rik	0.760698	0.196536	0.955693	-0.161147	0.806895	0.996172	1.72321	0.000644585	0.00964462	0.998529	0.00944726	0.131518	1.01808	0.00614589	0.0466884	0.235395	0.332874	0.617143	0.307834	0.298502	0.628339	0.455244	0.0435471	0.0794225
2900097C17Rik	0.383943	0.228433	0.955693	0.171479	0.540152	0.979378	0.657533	0.0236389	0.0952428	0.100731	0.746621	0.865218	-0.21688	0.48475	0.679729	-0.414857	0.0282664	0.15513	0.00821832	0.973084	0.995045	-1.16089	4.313e-10	5.06396e-09
3010026O09Rik	-0.125438	0.870258	0.986354	-0.82888	0.168448	0.880853	0.647345	0.17631	0.336688	0.0821418	0.851393	0.924682	0.0826171	0.832299	0.91563	0.855106	0.000671509	0.0133499	0.511403	0.0973371	0.379759	0.492424	0.0204537	0.0415909
3110001D03Rik	-0.080076	0.797658	0.978114	-0.0938634	0.730989	0.9929	-0.37441	0.153194	0.306605	0.0804742	0.82065	0.906886	-0.0310994	0.929468	0.966461	-0.579078	0.0111105	0.0882353	-0.524986	0.0570239	0.291397	0.086498	0.725939	0.794133
3110002H16Rik	0.768232	0.212166	0.955693	0.800412	0.170339	0.881733	1.89994	0.000312823	0.00612152	-0.7416	0.0960354	0.298947	-0.361625	0.406258	0.61571	-0.142932	0.538068	0.772555	-0.269161	0.330358	0.655331	0.200905	0.284037	0.378919
3110003A17Rik	-0.515833	0.162193	0.955693	-0.210401	0.509851	0.975024	-1.08819	0.00116232	0.0141291	-0.77544	0.125826	0.338986	-0.573448	0.187061	0.386836	-0.421184	0.220325	0.494984	-0.756721	0.0416381	0.248981	-0.0129342	0.970171	0.979166
3110009E18Rik	-0.0408141	0.967563	0.998817	-0.132079	0.812233	0.996172	-0.33204	0.492972	0.649759	0.0658161	0.894536	0.949125	0.706996	0.103185	0.270717	-0.141971	0.676192	0.852739	-0.422115	0.277031	0.608483	0.801631	0.00507355	0.0123107
3110039M20Rik	-0.665263	0.136113	0.955693	-1.02144	0.0154937	0.393454	-1.97508	1.38117e-05	0.000679021	-2.0156	0.0279745	0.187624	-1.73171	0.0158795	0.087848	-1.41675	0.00240553	0.0320952	-1.70457	0.00561623	0.0923255	-1.17875	4.5891e-07	3.14124e-06
3110040N11Rik	-0.290971	0.489264	0.955693	-0.150219	0.710497	0.992764	-0.16122	0.647261	0.772133	-0.239322	0.599007	0.773563	0.162008	0.684319	0.828102	-0.126792	0.672213	0.850493	-0.565983	0.106993	0.399008	0.277927	0.27148	0.364898
3110043O21Rik	-0.152067	0.700315	0.972227	0.0433391	0.889236	0.996527	0.0386067	0.899621	0.939966	-1.35638	0.0171411	0.160514	-0.798495	0.0878634	0.245007	0.269283	0.364966	0.644248	-0.786594	0.0914787	0.366797	0.893736	4.05098e-05	0.000173589
3110048L19Rik	1.12368	0.00867172	0.955693	1.14413	4.54574e-05	0.00621459	-0.10502	0.669602	0.789484	-0.20278	0.642056	0.80141	0.765566	0.0363518	0.146582	0.700536	0.00403813	0.045486	0.749904	0.0178187	0.163447	-0.184236	0.375133	0.47493
3110062M04Rik	-0.722875	0.277461	0.955693	-1.30181	0.0477841	0.634439	-0.955908	0.0835103	0.207631	0.622867	0.183295	0.408961	0.733228	0.0682436	0.210793	0.323737	0.209482	0.483338	0.136978	0.687621	0.880215	0.545757	0.0344733	0.0651598
3110082I17Rik	-0.530748	0.227009	0.955693	-0.515614	0.215741	0.925107	-0.692914	0.0696272	0.186645	0.344188	0.309579	0.539291	-0.476001	0.134756	0.318387	-0.143094	0.478008	0.732462	0.336765	0.170519	0.496871	0.483491	0.0119871	0.0261432
3200002M19Rik	-0.394663	0.296837	0.955693	-0.274744	0.414954	0.960673	-0.966854	0.00288879	0.025604	-0.656554	0.0597657	0.243494	-0.360953	0.255032	0.467013	-0.355301	0.0891073	0.303226	-0.175176	0.487697	0.78097	-0.33013	0.0771773	0.128479
3230401D17Rik	0.533758	0.195161	0.955693	1.19021	0.00192018	0.105875	1.13359	0.00206052	0.0206466	-0.540456	0.232707	0.461599	-0.223198	0.599204	0.769931	0.169235	0.487708	0.739905	-0.367558	0.323466	0.649617	0.472357	0.00882523	0.0199537
3300001P08Rik	-0.441526	0.212323	0.955693	0.0724947	0.796829	0.996172	-0.834774	0.00849785	0.0505716	0.24443	0.634883	0.796898	0.186636	0.712546	0.845867	0.564672	0.192338	0.464441	-0.0174894	0.970269	0.99434	0.0585285	0.888381	0.919905
3300002I08Rik	-0.637311	0.38688	0.955693	-0.399026	0.58108	0.982245	-0.00284851	0.958998	0.976404	-0.530963	0.435453	0.653017	-0.73422	0.171574	0.365722	-0.217761	0.601799	0.810192	0.0183082	1	1	-0.525266	0.162909	0.238566
3830406C13Rik	-0.800781	0.057703	0.955693	-0.497065	0.180236	0.892567	-1.24426	0.000479997	0.00791797	-1.15119	0.1194	0.33027	-0.803636	0.201822	0.404169	0.049289	0.907391	0.964507	-0.396857	0.424985	0.73367	-0.920981	0.00611546	0.0144798
3930401K13Rik	-0.279245	0.363017	0.955693	-0.343451	0.221908	0.929887	-0.22024	0.408065	0.578397	-0.351379	0.262836	0.49214	-0.216144	0.449736	0.651432	-0.108902	0.565028	0.790725	0.113881	0.637312	0.856311	-0.313267	0.0731845	0.123022
4632411B12Rik	0.418237	0.232819	0.955693	0.622532	0.0422889	0.605138	0.736744	0.0167942	0.0767938	0.499867	0.12295	0.335025	0.0225501	0.939317	0.971469	0.722248	0.000125677	0.00384743	0.53681	0.0240096	0.190322	0.293362	0.0901889	0.146284
4632415K11Rik	1.14799	0.0693412	0.955693	-0.62307	0.409476	0.960673	1.34464	0.0108143	0.0590578	0.430791	0.275643	0.505033	0.736254	0.0447375	0.165259	0.207841	0.384422	0.659921	0.0702921	0.807976	0.936717	-0.489313	0.0140437	0.0300185
4632415L05Rik	0.119084	0.726386	0.973017	-0.100454	0.767112	0.995033	-0.06662	0.830269	0.895309	-0.0111721	0.975589	0.989794	0.0929279	0.774221	0.882449	0.478174	0.0289901	0.156939	0.0131803	0.961993	0.991938	0.143141	0.466628	0.564343
4632434I11Rik	0.2338	0.458484	0.955693	1.46606	7.06143e-08	2.51689e-05	0.420825	0.156702	0.310973	0.127391	0.807996	0.902459	-0.371428	0.41793	0.625891	0.296004	0.4067	0.677169	-0.0889366	0.84083	0.949474	-0.0480301	0.901938	0.930179
4732418C07Rik	0.135515	0.670058	0.967922	0.321092	0.283215	0.948861	0.250828	0.391347	0.563584	-0.297749	0.386251	0.609282	0.16749	0.591039	0.764063	-0.393156	0.052565	0.224539	-0.0195576	0.939594	0.984094	-1.134	4.83914e-09	4.74874e-08
4732471D19Rik	-0.215654	0.552136	0.957503	0.263655	0.402673	0.960134	-0.352095	0.248344	0.420899	-1.58094	0.0205066	0.170444	-0.928924	0.070019	0.214353	-0.510066	0.0863736	0.298557	-0.504614	0.218507	0.550542	-0.84876	0.000578928	0.00184473
4831426I19Rik	0.433098	0.259553	0.955693	-0.663873	0.0823847	0.741576	0.458971	0.17103	0.329895	0.88171	0.0173522	0.160514	0.285128	0.392003	0.60357	0.293915	0.219319	0.494385	0.530133	0.0497813	0.272167	-1.99934	3.78334e-23	2.23418e-21
4833420G17Rik	-0.0836158	0.818302	0.981006	0.0966574	0.734431	0.9929	0.122312	0.662142	0.78361	-0.492721	0.220265	0.449694	-0.332695	0.336534	0.551133	-0.0624708	0.806405	0.920183	-0.452623	0.144879	0.459877	-0.267359	0.155718	0.2303
4833427G06Rik	0.0590571	0.897531	0.98914	-0.0852162	0.937641	0.996908	0.489447	0.304697	0.479331	0.833302	0.143142	0.35747	0.469721	0.343422	0.557943	-0.133684	0.810168	0.921107	0.428954	0.390007	0.703039	1.11235	0.000498209	0.00161906
4833439L19Rik	-0.0791807	0.810078	0.97996	-0.0886106	0.762351	0.993894	0.3088	0.255258	0.427788	-0.0983314	0.763692	0.875996	0.241522	0.411938	0.620309	-0.0427253	0.826624	0.928603	0.461306	0.053367	0.282249	0.397539	0.0221365	0.044469
4833442J19Rik	-0.307783	0.627653	0.962838	-0.298099	0.630093	0.987954	-0.344416	0.498206	0.654766	-1.40401	0.095292	0.298123	-1.54934	0.0156986	0.087463	-0.145828	0.633451	0.828913	-0.139141	0.742998	0.908493	0.0406763	0.869735	0.907091
4921513D23Rik	0.0706803	0.786171	0.976251	0.147105	0.536955	0.979378	0.399938	0.0887531	0.215775	-0.200258	0.59034	0.767235	0.465072	0.173288	0.367959	-0.269997	0.196983	0.470759	0.190477	0.489569	0.781996	-1.39869	3.68596e-14	7.90444e-13
4921524J17Rik	-0.566861	0.272455	0.955693	-0.165787	0.732401	0.9929	-0.863031	0.0544621	0.15944	0.677511	0.0912944	0.292369	0.395879	0.25887	0.471618	0.534011	0.0220005	0.132579	0.110509	0.730093	0.90155	1.56174	1.10833e-15	2.96546e-14
4921536K21Rik	1.71659	0.0289122	0.955693	1.74987	0.019894	0.438869	1.70645	0.026366	0.101713	-1.49692	0.0296178	0.191585	-0.2954	0.625671	0.789705	-1.29917	0.0225543	0.133903	-1.29718	0.0291864	0.209669	-2.30892	5.41139e-05	0.000226724
4922501C03Rik	-0.101299	0.787576	0.976801	-0.0634559	0.855229	0.996527	0.112352	0.727694	0.8289	-0.0236419	0.956474	0.981958	1.17114	0.000960735	0.0129176	1.3084	5.83141e-08	6.84676e-06	0.685204	0.0273661	0.203462	0.756298	0.000387996	0.00130729
4930402E16Rik	0.0802734	0.845229	0.983037	0.0871453	0.816325	0.996172	0.406835	0.279118	0.452812	-1.06365	0.1075	0.315452	-0.61398	0.274305	0.487197	0.246381	0.299248	0.583984	-0.108686	0.791348	0.92978	-0.744191	0.000713992	0.00222815
4930402H24Rik	0.347285	0.355557	0.955693	0.17577	0.597939	0.986681	0.212491	0.522564	0.675296	-0.567584	0.145838	0.361426	-0.46567	0.20449	0.407428	0.120495	0.561327	0.789465	-0.0686293	0.797638	0.932777	-0.335962	0.0701025	0.11864
4930420K17Rik	-0.119525	0.849431	0.984451	-0.142187	0.775843	0.995877	-0.794887	0.0709827	0.188657	-0.472547	0.331328	0.559406	-0.628067	0.145881	0.333621	-0.383438	0.221944	0.496756	-0.370071	0.317801	0.644534	-0.0509474	0.883498	0.916382
4930422G04Rik	0.101093	0.746747	0.974136	-0.223664	0.458922	0.967931	0.00761806	0.978841	0.988048	-0.963573	0.0657277	0.253246	-0.612168	0.218586	0.424511	0.129188	0.596993	0.807514	0.225109	0.455815	0.757541	-1.57819	2.42246e-12	4.06321e-11
4930422I07Rik	0.0324419	0.919314	0.992307	-0.367882	0.417975	0.961711	-0.260776	0.519076	0.673126	0.369206	0.4014	0.622529	0.489978	0.201536	0.404066	0.420795	0.0890845	0.303226	0.173514	0.57654	0.827707	0.0882561	0.684899	0.759343
4930427A07Rik	-0.133813	0.779527	0.974201	-0.162127	0.707756	0.992764	0.82621	0.0152756	0.0724572	0.27782	0.430064	0.647659	-0.429946	0.203566	0.406155	-0.11448	0.591509	0.803244	0.131814	0.627944	0.852405	-0.685162	0.000298542	0.00103489
4930430F08Rik	-0.711133	0.104601	0.955693	-0.49782	0.197233	0.912853	-0.334739	0.390439	0.562944	-0.375875	0.44139	0.658162	0.246911	0.550764	0.732721	0.158023	0.635232	0.829824	-0.295414	0.450108	0.753487	0.790216	0.00335935	0.00860752
4930432O21Rik	-0.674237	0.101125	0.955693	-0.784479	0.0402938	0.593115	-0.920436	0.0248197	0.0984	0.0811597	0.896466	0.950264	0.677617	0.139007	0.325271	1.01747	0.00235538	0.0316802	0.0937246	0.841946	0.94963	0.761269	0.0119407	0.0260706
4930444A02Rik	0.0763906	0.884094	0.987542	-0.396384	0.416666	0.960796	0.562696	0.185785	0.348522	-0.547262	0.217569	0.447026	-0.6057	0.118581	0.295122	0.123508	0.586139	0.800929	0.00930839	0.97595	0.995612	-0.29355	0.126919	0.194809
4930451C15Rik	0.0618945	0.923882	0.992307	0.578281	0.295629	0.949068	-0.226187	0.640744	0.767622	-0.743834	0.222037	0.451309	-0.620973	0.230873	0.439214	-0.0327403	1	1	0.59515	0.216786	0.549258	-0.89869	0.0197706	0.0403497
4930452B06Rik	-0.190369	0.631478	0.962838	-0.620346	0.0870266	0.753275	-0.558545	0.0985758	0.230189	-0.015555	0.969289	0.987293	0.0518822	0.882683	0.944352	0.37183	0.101581	0.326256	0.461119	0.0910598	0.365772	-0.046131	0.82076	0.867802
4930453N24Rik	-0.293874	0.395896	0.955693	-0.203948	0.474679	0.969962	-0.70483	0.0267747	0.102774	-0.00592649	0.990617	0.997413	-0.650703	0.07769	0.227909	-0.166725	0.498002	0.746031	-0.513544	0.1185	0.418334	0.491256	0.0210321	0.0425847
4930455C21Rik	0.0303725	0.933803	0.994867	-0.28835	0.44471	0.966496	-0.780917	0.0262195	0.101501	0.395089	0.31242	0.542252	0.704729	0.0501106	0.175145	0.329602	0.179796	0.448112	0.199734	0.496162	0.784365	0.875417	3.50988e-05	0.000153499
4930455F23Rik	-0.00502692	1	1	-0.446962	0.241482	0.93973	-0.0566605	0.882132	0.929588	0.109636	0.820143	0.906664	0.419726	0.322007	0.536505	0.714618	0.0270806	0.152042	0.576953	0.123467	0.426664	0.620166	0.0348742	0.0657804
4930471M23Rik	0.490888	0.438137	0.955693	-0.039473	0.988074	1	1.10282	0.0550861	0.160546	-0.152606	0.647141	0.803892	0.225921	0.489759	0.68332	0.135042	0.533029	0.769067	-0.0221278	0.931467	0.981962	0.3521	0.0814211	0.134422
4930473A06Rik	-0.484569	0.366489	0.955693	-0.53724	0.290922	0.949068	-0.268514	0.575434	0.719112	0.589495	0.187209	0.414176	0.876209	0.0222784	0.10832	0.943589	0.000509811	0.0110848	0.521931	0.116965	0.414823	0.37545	0.110131	0.172897
4930486L24Rik	-0.215718	0.634259	0.962838	-0.117899	0.788216	0.996172	-0.6242	0.0804352	0.20369	-0.478346	0.34406	0.57181	0.485753	0.241802	0.452246	0.223845	0.408848	0.678242	-0.16211	0.656944	0.863376	-0.429218	0.0837276	0.137593
4930500O05Rik	0.589759	0.354458	0.955693	-0.226585	0.809108	0.996172	0.831892	0.132068	0.277366	0.129508	0.769221	0.87916	-0.103275	0.796667	0.895288	0.292139	0.286051	0.572101	0.230666	0.483096	0.776433	0.0923029	0.713227	0.783835
4930503L19Rik	-0.370344	0.303397	0.955693	-0.293793	0.354654	0.960134	-0.833297	0.0118366	0.0625022	0.101852	0.816184	0.905449	0.649078	0.0863836	0.242916	0.502728	0.0691102	0.263152	0.0315235	0.924884	0.979823	0.290161	0.23232	0.322022
4930511M06Rik	1.29979	0.0185118	0.955693	1.32863	0.00247897	0.122476	0.0386899	0.921327	0.95406	-1.10113	0.152878	0.371388	0.1139	0.846471	0.924568	0.296533	0.406836	0.677169	-0.190618	0.7016	0.887361	-0.672755	0.0377545	0.0703754
4930523C07Rik	-0.05722	0.920608	0.992307	-0.284344	0.504512	0.974559	-0.0152566	0.987462	0.994036	-0.759808	0.0890139	0.289629	-0.327233	0.392539	0.6038	-0.527521	0.0326243	0.168787	-0.114166	0.687736	0.880215	-1.94051	1.5608e-17	5.15788e-16
4930534B04Rik	-0.203463	0.509955	0.955693	-0.063689	0.824817	0.996172	-0.0411718	0.894859	0.937507	-0.489611	0.241255	0.471382	-0.0289802	0.938454	0.971264	-0.0272747	0.919919	0.969712	-0.353704	0.29558	0.626038	-0.714993	0.00505697	0.0122854
4930539E08Rik	0.399726	0.605345	0.96167	0.465937	0.540745	0.979378	-0.210564	0.754169	0.846065	-0.220371	0.711588	0.844111	1.79603	0.000324008	0.00604199	0.722549	0.0688535	0.262896	0.545262	0.255205	0.588911	0.10374	0.88015	0.913942
4930546H06Rik	-0.249357	0.626696	0.962838	-0.443781	0.387643	0.960134	0.211595	0.648597	0.772988	0.761454	0.0898044	0.29099	1.32336	0.00180694	0.0199134	0.35487	0.147374	0.400761	0.842091	0.00847493	0.115716	-1.05802	4.29448e-05	0.000183099
4930547N16Rik	-0.284075	0.530768	0.957503	-0.75729	0.0638628	0.68792	-0.492675	0.200187	0.365575	-1.57114	0.00231303	0.071603	-1.67688	0.00019622	0.00421134	-0.67839	0.0281315	0.1546	-1.18562	0.00160283	0.0439457	-1.42791	2.13262e-09	2.22632e-08
4930572J05Rik	0.0404681	0.92608	0.99294	-0.167234	0.786989	0.996172	1.66649	0.00014944	0.00373474	0.908081	0.0557735	0.236156	1.2986	0.00388485	0.0339774	-0.406882	0.11783	0.352352	0.409581	0.27254	0.605509	-0.280601	0.249048	0.340386
4930578N16Rik	-1.45759	0.0309097	0.955693	-1.46707	0.0154067	0.392242	-0.955467	0.103677	0.237534	-0.433743	0.53582	0.727198	0.464057	0.402436	0.612057	1.00765	0.00997645	0.082402	0.239944	0.654051	0.86239	1.02473	0.00324495	0.00835733
4930579E17Rik	0.0112358	1	1	0.139043	0.883808	0.996527	-0.320196	0.529887	0.681303	-0.264593	0.615827	0.784254	0.0713145	0.891302	0.947911	0.0619173	0.856588	0.942488	-0.518832	0.221423	0.553558	0.403156	0.134599	0.204056
4930579G24Rik	-0.486716	0.203615	0.955693	-0.162711	0.63364	0.98932	-0.232086	0.480557	0.640229	-0.0243531	0.949795	0.977961	-0.261266	0.452539	0.653921	-0.641569	0.0117366	0.0907402	-0.0808757	0.775598	0.922191	-1.06184	1.07745e-06	6.70381e-06
4930583H14Rik	0.178156	0.70019	0.972227	-0.239534	0.793619	0.996172	0.720956	0.176663	0.337177	1.00211	0.0748745	0.26697	0.985979	0.0599199	0.195489	0.225616	0.554688	0.78544	0.258912	0.618195	0.847438	-0.275364	0.470923	0.568572
4931406C07Rik	-0.20733	0.5667	0.958003	-0.390773	0.24262	0.93973	-0.433116	0.169593	0.328074	-0.708124	0.132851	0.346175	-0.573299	0.144389	0.331722	-0.0924214	0.746828	0.890331	-0.0121222	0.97311	0.995045	-0.199413	0.426196	0.52557
4931406H21Rik	-0.356927	0.516449	0.956646	-0.856871	0.110879	0.81513	-0.113569	0.769597	0.855394	1.34619	0.0363374	0.204193	2.2633	7.80198e-06	0.000395247	0.287493	0.574932	0.795371	2.95724	0.000897776	0.0320209	-3.32897	2.60147e-06	1.48273e-05
4931406P16Rik	-0.0859585	0.768658	0.974201	-0.708836	0.00537991	0.202609	-0.420031	0.101212	0.233927	1.02861	0.00576072	0.109104	1.3035	0.000194145	0.00418481	0.26263	0.211316	0.485595	0.781519	0.00413339	0.0784244	-0.295375	0.126382	0.194134
4931408A02Rik	0.24135	0.64168	0.962838	0.907692	0.0448852	0.618721	-0.525142	0.215488	0.38355	0.0173522	0.972321	0.988297	-0.425955	0.252641	0.464681	-0.601982	0.0186082	0.120123	-0.0409436	0.904104	0.971828	-1.8506	1.07062e-14	2.50228e-13
4931414P19Rik	-0.107654	0.92744	0.993437	-0.0560048	0.995001	1	0.563901	0.255523	0.427948	0.666611	0.123727	0.336065	0.687662	0.0820215	0.234818	0.28735	0.247066	0.529448	0.525089	0.083256	0.349502	0.408421	0.0498215	0.0889468
4931428F04Rik	-0.0976613	0.837049	0.981501	-0.593512	0.137094	0.846325	0.00978384	0.96475	0.980269	-0.184717	0.65959	0.811272	-0.383714	0.335413	0.550382	-0.287533	0.29429	0.579076	-0.190432	0.54698	0.810752	-0.722475	0.00324621	0.00835841
4932412H11Rik	-0.743444	0.367128	0.955693	-0.667303	0.340623	0.960134	-2.37572	0.000866803	0.0115355	1.31586	0.0811715	0.278669	1.39421	0.0451036	0.166128	0.878693	0.236395	0.51612	1.2064	0.11237	0.406472	1.32335	0.0264104	0.0518035
4932415G12Rik	-0.747664	0.161387	0.955693	-0.767562	0.124858	0.830956	-0.972319	0.0389048	0.128481	0.120904	0.798899	0.89766	-0.34194	0.395154	0.605596	1.38869	2.43672e-07	2.19086e-05	0.456445	0.179342	0.508621	1.13303	1.73386e-06	1.03368e-05
4932417I16Rik	-0.531272	0.192141	0.955693	-0.483519	0.210537	0.923587	-0.728963	0.0549382	0.16027	0.123978	0.720368	0.850198	0.0746312	0.815324	0.90642	-0.165956	0.421163	0.687697	0.0304656	0.905905	0.972771	-0.0543161	0.767281	0.826315
4932438A13Rik	-0.126076	0.681375	0.969978	0.0138111	0.94886	0.997148	0.142829	0.576024	0.719669	-1.02007	0.0409322	0.214521	-0.651742	0.154743	0.344643	0.0745445	0.790646	0.913415	-0.197945	0.610511	0.845077	-1.00522	5.66217e-08	4.56081e-07
4932441K18Rik	-0.871397	0.0705847	0.955693	-0.514689	0.21615	0.925432	-0.994925	0.0168967	0.0771758	-0.0619975	0.893631	0.948467	-0.788137	0.046015	0.168093	-0.106657	0.726683	0.878959	0.0425081	0.897502	0.970115	0.378188	0.118096	0.183211
4933403F05Rik	-0.253931	0.38642	0.955693	0.00265748	0.982818	1	-0.318971	0.219766	0.388035	-0.567412	0.134465	0.348652	-0.511599	0.169005	0.362802	-0.0905281	0.661561	0.844726	-0.138235	0.614386	0.846495	-0.0554814	0.760242	0.821394
4933404O12Rik	0.164299	0.653005	0.964426	-0.113959	0.760791	0.993757	-0.101835	0.766208	0.853747	-0.321025	0.400073	0.621709	0.0508518	0.884067	0.944559	-0.242686	0.279869	0.564946	-0.31761	0.268257	0.602024	-0.0577901	0.765605	0.825579
4933407C03Rik	0.35202	0.288172	0.955693	0.37837	0.214515	0.924379	1.04883	0.000367659	0.00678232	0.385057	0.226339	0.455467	0.366954	0.222852	0.429439	0.0531747	0.801308	0.91783	0.692865	0.00493703	0.0857579	0.250428	0.194195	0.276907
4933407H18Rik	-0.406408	0.268742	0.955693	-0.526342	0.112327	0.815293	-0.900975	0.00973911	0.0550787	0.432236	0.264585	0.493419	0.350422	0.321318	0.535801	0.956784	1.44368e-05	0.000671361	0.66281	0.0173666	0.161227	-0.385501	0.05449	0.0958456
4933407N01Rik	-0.254184	0.492145	0.955693	-0.223477	0.465778	0.967931	-0.75444	0.0176338	0.0790234	-0.0846915	0.854531	0.926218	0.193213	0.6314	0.794427	0.1184	0.704528	0.867987	-0.186398	0.592424	0.834358	0.30961	0.207043	0.292096
4933408B17Rik	0.0543801	0.904828	0.991053	0.662632	0.328879	0.957867	-1.28663	0.0888141	0.215818	0.420903	0.479165	0.687039	1.14294	0.0201611	0.102343	-0.244308	0.6229	0.822571	-0.189486	0.780136	0.923797	-1.8463	0.000216742	0.000780838
4933411K20Rik	-0.278547	0.398987	0.955693	-0.953975	0.00195563	0.107237	-0.529235	0.0799925	0.20324	-1.20424	0.0828703	0.281691	-0.400515	0.562002	0.741608	0.449115	0.15635	0.415213	0.0165598	0.968242	0.993489	-1.04307	1.39258e-06	8.48989e-06
4933421E11Rik	-0.955672	0.0319541	0.955693	-1.24787	0.00313259	0.142754	-0.618431	0.112178	0.250007	0.272791	0.550058	0.738045	-0.349986	0.372551	0.58663	0.930351	0.000237917	0.00628153	0.897747	0.00786881	0.110705	2.02979	1.88261e-16	5.46177e-15
4933424B01Rik	-0.0406322	0.902585	0.990957	0.278855	0.252234	0.93973	-0.264858	0.299974	0.474519	0.346971	0.289848	0.519146	0.389334	0.200892	0.403585	0.247809	0.231598	0.510132	0.1465	0.554142	0.815557	0.436537	0.0202906	0.0412844
4933426M11Rik	0.169568	0.641717	0.962838	1.12262	0.00011391	0.0133744	0.8727	0.00509246	0.0367748	0.485012	0.147265	0.363428	1.05607	0.000776604	0.0110824	0.0493268	0.823448	0.927325	0.164714	0.529535	0.800147	0.385332	0.0609674	0.105305
4933427D14Rik	-0.214728	0.52716	0.957426	0.0764335	0.78782	0.996172	0.0680522	0.810797	0.880784	-0.0239173	0.948771	0.977574	0.110132	0.747815	0.867031	0.607578	0.00393412	0.0448714	0.20939	0.436834	0.742515	0.0312567	0.87165	0.908212
4933428G20Rik	0.290114	0.470648	0.955693	0.122417	0.727167	0.9929	0.763463	0.0325753	0.11508	1.27832	0.000376478	0.0312545	0.791825	0.0158598	0.0877877	0.336084	0.106056	0.333752	0.670179	0.0104898	0.128294	-0.0865214	0.647535	0.729097
4933433P14Rik	-0.298716	0.445202	0.955693	-0.49208	0.177968	0.888599	-0.551965	0.106956	0.242485	-0.914881	0.0458721	0.221464	-0.993842	0.0123013	0.0744041	-0.188607	0.432658	0.697227	-0.447361	0.13855	0.450988	0.0078689	0.972991	0.981017
4933434E20Rik	-0.28252	0.452331	0.955693	-0.389162	0.262367	0.94536	-0.269668	0.403135	0.573935	-0.673519	0.098269	0.301947	-0.0495606	0.888788	0.946868	-0.184235	0.44065	0.702656	-0.744281	0.0167779	0.158714	0.0713759	0.755143	0.817566
4933439F18Rik	-0.499786	0.189606	0.955693	-0.484116	0.171948	0.882375	-0.460665	0.159686	0.315515	-0.162453	0.636351	0.797879	-0.0653569	0.838876	0.91959	-0.205825	0.333045	0.61723	-0.224608	0.384727	0.699376	0.280307	0.160796	0.235828
5031414D18Rik	-0.555595	0.305082	0.955693	-0.35306	0.493555	0.973297	-1.25221	0.0108934	0.0593105	-1.23535	0.0430267	0.217347	-1.6928	0.00123573	0.0154158	0.29502	0.318442	0.603875	0.0924175	0.824947	0.942419	-0.34384	0.179492	0.258527
5031439G07Rik	0.409007	0.285061	0.955693	0.241468	0.468629	0.967931	1.38309	7.25882e-05	0.00222902	0.488638	0.164827	0.387052	0.467232	0.15234	0.342344	-0.434858	0.0457631	0.206529	0.0084178	0.974635	0.995493	-0.805165	4.24933e-05	0.000181542
5033414D02Rik	-0.968972	0.0263278	0.955693	-0.88428	0.0315137	0.542256	-1.17976	0.00266652	0.0242462	-0.344119	0.37645	0.600798	-0.995593	0.00874216	0.0589505	-0.406663	0.137363	0.385315	-0.634304	0.0341712	0.225996	0.404848	0.0626422	0.107658
5133400G04Rik	-0.371986	0.446241	0.955693	-0.409217	0.371733	0.960134	-0.700047	0.0766149	0.197626	0.296908	0.512511	0.710299	0.0190208	0.96604	0.985896	0.428048	0.11147	0.342921	0.391021	0.223453	0.554901	0.592191	0.011324	0.0248929
5330426P16Rik	-0.134492	0.803717	0.979508	-0.753376	0.167479	0.880634	-0.040755	0.922155	0.954332	0.863574	0.100563	0.305052	1.88788	9.7886e-06	0.000462987	0.494354	0.0955323	0.315016	0.222199	0.574412	0.826861	1.21919	1.73733e-06	1.0339e-05
5330431N19Rik	0.447564	0.34175	0.955693	0.225539	0.607399	0.986881	1.09556	0.00635792	0.0422732	0.372954	0.336258	0.563914	0.0479405	0.894412	0.949112	0.169622	0.501655	0.748492	0.201281	0.498909	0.785845	0.646287	0.00383526	0.00965832
5430405H02Rik	0.171397	0.730335	0.973401	0.354408	0.46968	0.967931	-0.175566	0.816587	0.885338	0.462179	0.375553	0.599875	0.870297	0.052572	0.179978	0.406145	0.185636	0.456218	0.229561	0.55283	0.814769	0.690622	0.0114606	0.0251696
5430435G22Rik	0.0511439	0.851617	0.984587	-0.717414	0.0141128	0.376594	-0.11285	0.685989	0.799573	-0.191036	0.579499	0.760274	-0.544062	0.0776563	0.227877	-0.0118689	0.952224	0.982629	0.0910735	0.704482	0.889226	-2.96785	3.85028e-51	1.92129e-48
5430437P03Rik	0.135536	0.688331	0.971177	0.0186182	0.93444	0.996527	0.385591	0.199322	0.364507	0.449666	0.189237	0.416631	0.570654	0.100838	0.266444	-0.0140778	0.942889	0.978697	0.459798	0.0742054	0.33153	0.568323	0.00292644	0.00763126
5730403B10Rik	0.201943	0.539489	0.957503	0.229377	0.445617	0.966629	0.107846	0.712708	0.818319	0.669607	0.0411765	0.214853	0.243614	0.43964	0.643499	-0.0999006	0.635003	0.829824	0.104678	0.672398	0.871415	0.0602816	0.752134	0.81475
5730403M16Rik	-0.711744	0.211917	0.955693	-0.347071	0.49452	0.973406	0.996837	0.0164105	0.0759267	-0.8652	0.0879734	0.288266	-0.223903	0.581729	0.758352	-0.21651	0.413869	0.6826	-0.7	0.057535	0.292803	-0.522314	0.0145438	0.0309086
5730408K05Rik	-1.3392	0.0262318	0.955693	-0.914137	0.0859312	0.749644	-2.2933	3.55284e-05	0.00139742	-0.520748	0.339905	0.567384	0.5286	0.202353	0.404706	0.256183	0.406912	0.677169	-0.0615825	0.883961	0.964874	0.864763	0.00303572	0.00787945
5730409E04Rik	-0.0009584	0.994649	1	-0.582411	0.0919989	0.767978	-0.450335	0.150471	0.30264	-0.00495055	0.989105	0.996897	-0.110751	0.725917	0.85445	0.187833	0.35485	0.637004	0.158666	0.524687	0.7981	-0.28173	0.123777	0.19078
5730419I09Rik	-0.296263	0.473282	0.955693	-0.777127	0.0364924	0.568714	-0.509098	0.130178	0.274957	-0.527079	0.169121	0.391607	-0.647879	0.0637294	0.202296	0.162922	0.439257	0.702016	-0.0661068	0.802325	0.935268	0.0466421	0.800768	0.854055
5730427N09Rik	-0.340074	0.262926	0.955693	0.0500228	0.834966	0.996172	-0.35154	0.227272	0.396257	-0.9141	0.0808693	0.277958	-0.758248	0.0638143	0.202437	-0.151667	0.499072	0.746757	-0.336162	0.195933	0.529166	0.371585	0.035777	0.0672419
5730437N04Rik	-0.122403	0.714629	0.972787	-0.00675918	0.990777	1	-0.0139051	0.964582	0.980238	-0.164111	0.6176	0.785125	-0.342272	0.285414	0.500075	-0.0788785	0.697318	0.865026	-0.240261	0.326864	0.652682	0.616875	0.000801282	0.00246249
5730455O13Rik	-0.516247	0.212786	0.955693	-0.609178	0.112706	0.816257	-0.707477	0.0729122	0.191945	0.384055	0.378796	0.603103	-1.05185	0.00650189	0.0484969	0.227639	0.388619	0.662144	-0.375659	0.250132	0.583502	0.913139	0.000305795	0.00105746
5730455P16Rik	-0.282319	0.462156	0.955693	-0.367513	0.293602	0.949068	-0.27437	0.394546	0.56623	-0.667997	0.11634	0.325967	-0.303275	0.410287	0.619372	0.282357	0.217138	0.492694	-0.343035	0.305296	0.635182	0.270116	0.176186	0.254646
5730469M10Rik	0.101841	0.799388	0.978114	-0.457106	0.249995	0.93973	-0.448853	0.242508	0.41414	0.108671	0.802737	0.899339	0.436722	0.233311	0.441663	0.190378	0.481362	0.734667	0.372016	0.292749	0.623469	0.413183	0.0544601	0.0958285
5730470L24Rik	-0.361278	0.330187	0.955693	-0.659346	0.0564957	0.670959	-0.719771	0.0263228	0.101704	-0.266852	0.460525	0.673132	-1.15203	0.00662633	0.0489495	-0.162065	0.474287	0.73001	-0.586268	0.0291784	0.209669	0.191659	0.311926	0.408319
5730494M16Rik	-0.190712	0.55894	0.957503	0.0353557	0.891516	0.996527	-0.279583	0.319571	0.49355	-0.912275	0.0779439	0.272176	-0.568716	0.269636	0.481821	-0.27241	0.306675	0.591793	-0.500593	0.185363	0.515764	-0.762081	0.000401018	0.00134315
5730494N06Rik	0.37678	0.301216	0.955693	-0.117687	0.755468	0.9929	-0.204722	0.548572	0.697723	0.149309	0.696737	0.834947	0.296579	0.391828	0.603556	0.224757	0.334603	0.618379	-0.109947	0.70534	0.889249	1.07174	5.8395e-08	4.69607e-07
5730507C01Rik	-0.399387	0.268261	0.955693	-0.135889	0.6764	0.99077	-0.329036	0.288918	0.463346	0.59959	0.167103	0.389311	0.344784	0.343095	0.557669	0.454656	0.0700527	0.265625	-0.0445981	0.891794	0.968025	-0.440449	0.0531133	0.0940008
5730508B09Rik	-0.596731	0.41891	0.955693	-0.684679	0.314698	0.955127	-1.70177	0.00699886	0.0445463	0.235194	0.746793	0.865218	-1.20582	0.04962	0.174185	-0.0330491	1	1	0.109463	0.876717	0.962953	1.44816	3.55321e-05	0.000155123
5730528L13Rik	0.196161	0.571925	0.958723	0.195605	0.53655	0.979378	0.00843697	0.971383	0.983704	-0.0187705	0.963593	0.985011	0.0791811	0.829281	0.914267	0.118915	0.650035	0.837405	-0.0899295	0.768861	0.91961	0.246855	0.301054	0.397108
5730559C18Rik	-0.00778087	1	1	-0.261646	0.691441	0.991213	-0.0403643	0.925787	0.955272	0.952961	0.0362339	0.204071	1.25765	0.00262593	0.0255427	-0.0736068	0.781414	0.908604	0.51501	0.112293	0.406409	-1.28039	1.85564e-07	1.36674e-06
5730577I03Rik	-0.544072	0.428187	0.955693	-1.13729	0.0733561	0.710491	-1.1629	0.0612825	0.171901	-0.342532	0.56267	0.747121	0.415348	0.379425	0.592591	0.120392	0.770444	0.902066	-0.841178	0.0713246	0.326223	0.24533	0.476223	0.574346
5730590G19Rik	0.0803313	0.772474	0.974201	0.0310906	0.893201	0.996527	0.193707	0.451249	0.615563	-0.317366	0.329755	0.558072	-0.809669	0.00973432	0.0633302	0.351203	0.0790181	0.282855	0.499014	0.0418363	0.249416	-0.871009	1.67599e-06	1.00218e-05
5730601F06Rik	0.029094	0.904248	0.991053	-0.0424804	0.882052	0.996527	-0.139973	0.579108	0.722528	-0.959713	0.068118	0.256552	-0.568197	0.153676	0.343953	-0.299646	0.259851	0.542197	-0.481324	0.217749	0.549961	-1.89781	2.26499e-11	3.25246e-10
5830415F09Rik	-0.28081	0.598475	0.96167	-0.858722	0.077357	0.726398	-0.561024	0.168529	0.326908	0.4062	0.371524	0.596986	0.745792	0.0643301	0.203426	0.175461	0.534001	0.7698	0.120487	0.733338	0.903433	0.402059	0.0860393	0.140789
5830415L20Rik	-0.225602	0.556472	0.957503	0.351291	0.256066	0.93973	-0.171471	0.596206	0.73613	-0.621768	0.246057	0.475729	-0.268526	0.558177	0.738219	0.0261782	0.934101	0.976098	-0.210346	0.592036	0.8343	-0.062629	0.800826	0.854055
5830417I10Rik	0.216697	0.467554	0.955693	0.147576	0.571525	0.981301	0.686118	0.0133909	0.0671652	0.165194	0.594951	0.771018	0.202778	0.480476	0.67623	0.135318	0.471742	0.727742	0.362579	0.12533	0.430949	-0.864872	6.77543e-07	4.43984e-06
5830418K08Rik	-0.110744	0.69581	0.971351	-0.177675	0.477364	0.970314	-0.387806	0.138178	0.285969	-0.649061	0.135601	0.349575	-0.421452	0.302686	0.517882	0.491929	0.0561451	0.233092	-0.0229372	0.944171	0.986069	-0.699287	0.00314762	0.00812763
5830433M19Rik	-0.820263	0.0594652	0.955693	-0.80798	0.0529282	0.655602	-0.907225	0.03008	0.109601	-0.0987905	0.81826	0.905894	-0.873536	0.0651371	0.204921	0.271869	0.276429	0.561638	-0.14134	0.654558	0.862669	0.767105	0.000432059	0.00142922
5930416I19Rik	-0.0156292	0.983232	1	-0.125688	0.711961	0.992764	-0.436746	0.162675	0.319801	-0.0366241	0.918807	0.962441	0.124681	0.709209	0.844003	0.217553	0.352996	0.635215	0.321278	0.261144	0.595055	0.666682	0.00235387	0.00635251
6030419C18Rik	0.67759	0.251382	0.955693	-0.168126	0.773924	0.995587	0.450092	0.320388	0.494352	1.28714	0.000541078	0.0352938	1.58026	8.24462e-06	0.000407533	0.423063	0.0594985	0.241863	0.730584	0.00683683	0.102604	1.08684	8.50995e-08	6.64029e-07
6030422M02Rik	1.60824	0.0768436	0.955693	1.36431	0.108624	0.813251	-0.282431	0.745219	0.840927	-0.859884	0.136193	0.350401	0.138412	0.852086	0.927858	-0.224974	0.551344	0.782593	-0.634495	0.199261	0.531861	-1.46265	7.06628e-05	0.000288078
6030446N20Rik	-0.404489	0.476421	0.955693	-0.939348	0.0961958	0.777985	-0.698181	0.167472	0.325517	-0.666564	0.160524	0.38062	-1.35805	0.00108733	0.014002	-0.0297596	0.930874	0.974625	-0.257239	0.465901	0.765004	0.332049	0.168777	0.245646
6030458C11Rik	0.0380325	0.907782	0.991053	-0.305933	0.385938	0.960134	-0.555076	0.0883704	0.215002	-0.175738	0.632391	0.794782	0.115866	0.727751	0.855371	0.411405	0.0542691	0.228622	-0.0485494	0.857782	0.956285	0.506682	0.0062518	0.0147536
6230409E13Rik	0.212954	0.545626	0.957503	0.16496	0.606354	0.986881	0.0940596	0.756142	0.847137	-0.678084	0.127074	0.340456	-0.107362	0.768585	0.879238	-0.234848	0.337486	0.620278	-0.246615	0.424623	0.733555	-1.06229	2.7035e-08	2.31994e-07
6230427J02Rik	0.360186	0.555977	0.957503	1.11848	0.0321732	0.544294	0.38829	0.402192	0.573247	0.332401	0.470353	0.680348	-0.57033	0.145943	0.333621	-0.359198	0.183195	0.453202	-0.175955	0.616391	0.846495	0.14138	0.554113	0.645377
6330406I15Rik	-0.143649	0.609026	0.96167	-0.664002	0.00784675	0.257601	-0.32737	0.239153	0.410588	0.46537	0.130949	0.344549	0.499304	0.0833781	0.237407	0.540736	0.00547637	0.0552621	0.284768	0.22413	0.555317	-1.0558	5.69274e-09	5.51587e-08
6330407J23Rik	-0.0157515	0.98772	1	0.249127	0.434268	0.964182	0.765893	0.00909547	0.052683	0.87089	0.0361313	0.203851	0.362265	0.335695	0.550679	0.204091	0.380597	0.657149	0.188043	0.539109	0.80691	0.0827356	0.672109	0.749625
6330408A02Rik	0.450538	0.346171	0.955693	-0.0782886	0.889933	0.996527	-0.409108	0.309015	0.483464	0.807336	0.0691495	0.258566	1.70571	3.47953e-05	0.00126736	0.495431	0.0963933	0.316358	0.409394	0.221901	0.553907	0.293124	0.241567	0.3323
6330409N04Rik	-0.459256	0.269159	0.955693	0.238109	0.484752	0.97191	-0.053815	0.887365	0.932959	0.18124	0.690153	0.829647	-1.1224	0.00235207	0.0238173	-0.14614	0.548609	0.780541	-0.632357	0.0440807	0.257661	0.445173	0.0282764	0.0549421
6330416G13Rik	-0.469315	0.23775	0.955693	-0.43064	0.237852	0.938307	-0.434103	0.240523	0.411753	0.297134	0.433596	0.650886	1.10635	0.00263531	0.0255785	0.781496	0.000876373	0.0163175	0.212238	0.458547	0.759677	1.05134	1.19269e-07	9.06557e-07
6330416L07Rik	-0.746823	0.128811	0.955693	-0.501452	0.250414	0.93973	-0.979923	0.0206819	0.0870539	0.310304	0.501123	0.702812	0.627763	0.109455	0.280885	0.604864	0.0263937	0.149156	0.174481	0.615408	0.846495	0.735141	0.00130616	0.00379268
6330503K22Rik	-0.393021	0.244818	0.955693	0.0549502	0.844951	0.996527	0.18608	0.506536	0.66272	-0.481523	0.247539	0.477749	0.0339074	0.930113	0.96683	0.259525	0.251343	0.533139	0.0346629	0.901392	0.971531	-0.471731	0.0235124	0.0468464
6330577E15Rik	-0.362598	0.282856	0.955693	0.0199828	0.929509	0.996527	-0.590798	0.0473269	0.145882	-0.799107	0.0517704	0.230152	-0.628717	0.0876713	0.244946	-0.318244	0.286442	0.572769	-0.167572	0.609642	0.844896	-0.672645	0.0183384	0.0378292
6330578E17Rik	0.224023	0.453184	0.955693	0.128918	0.615837	0.986881	0.475792	0.0802497	0.203536	-0.472633	0.19314	0.420493	-0.523931	0.144709	0.332262	-0.485875	0.0550467	0.230266	-0.31862	0.267859	0.601821	-0.905416	0.000422097	0.00140137
6430526N21Rik	0.302756	0.548158	0.957503	-0.184721	0.746309	0.9929	0.727741	0.100764	0.233431	0.933302	0.0305181	0.193011	0.354988	0.362321	0.576433	0.419355	0.118144	0.3527	0.419163	0.193806	0.525986	0.28507	0.268731	0.362108
6430527G18Rik	-0.259657	0.421793	0.955693	-1.0404	0.001047	0.0682944	0.0282773	0.915408	0.950356	0.835616	0.0332924	0.199768	0.577651	0.0948633	0.257195	0.114408	0.585073	0.80048	0.545846	0.0499671	0.272946	-1.18344	4.47691e-09	4.42372e-08
6430548M08Rik	0.171057	0.751295	0.974136	-0.0187839	0.974361	0.999265	0.938048	0.0787448	0.201042	-0.327436	0.532377	0.724847	0.430383	0.375684	0.58915	-0.83306	0.0392562	0.188019	-0.0875104	0.863262	0.95886	0.866401	0.0179517	0.0371465
6530401D17Rik	-0.609522	0.294669	0.955693	-0.768643	0.145209	0.854977	-1.16469	0.0288581	0.10748	0.133555	0.836788	0.915394	-1.14083	0.0287182	0.126314	-0.383061	0.391583	0.665872	0.295107	0.524547	0.7981	0.157856	0.672576	0.750014
6530401N04Rik	-0.110431	0.79621	0.978114	-0.56119	0.160478	0.867557	-0.233302	0.48857	0.646761	0.315182	0.441738	0.658483	-0.0243773	0.951285	0.978508	0.442482	0.0678978	0.261226	0.0520257	0.866301	0.960311	0.833795	1.16439e-05	5.66306e-05
6530418L21Rik	1.28091	0.0473575	0.955693	3.24947	8.07484e-09	4.24142e-06	1.84441	0.000759718	0.0106767	0.212213	0.64977	0.80592	1.04332	0.00728801	0.0520275	-0.452224	0.096132	0.316111	0.0166854	0.966652	0.993326	-0.600614	0.0125874	0.0273032
6720401G13Rik	-0.520887	0.284853	0.955693	-0.362755	0.415172	0.960673	-0.0985162	0.818659	0.886718	-0.154485	0.712496	0.844703	-0.310098	0.42407	0.631117	0.485161	0.0613614	0.245938	0.40433	0.199403	0.532096	1.23542	9.38796e-08	7.2807e-07
6720456B07Rik	0.153071	0.647963	0.963151	-0.177908	0.577789	0.981301	0.606409	0.0543396	0.159268	-0.277276	0.376976	0.601186	-0.572329	0.0498681	0.174687	-0.168315	0.385877	0.660464	-0.235617	0.317875	0.644534	0.440367	0.025273	0.0498567
6720456H20Rik	-0.420709	0.369513	0.955693	-0.57333	0.187685	0.900606	-1.15034	0.00923635	0.0531596	-0.155048	0.721167	0.850436	-0.129888	0.724952	0.854114	-0.0594865	0.810935	0.921322	-0.208336	0.500334	0.786104	-0.0129218	0.953508	0.967762
6720457D02Rik	0.468866	0.339033	0.955693	-0.0762735	0.920607	0.996527	0.0247935	0.932656	0.959973	-1.33037	0.108143	0.316305	-1.503	0.00414111	0.0354749	-0.589578	0.123115	0.360636	-0.66035	0.150576	0.468877	-0.624534	0.0759276	0.126843
6720460F02Rik	-0.349526	0.264575	0.955693	-0.810086	0.00653609	0.228878	-0.776372	0.0107444	0.0587853	0.222615	0.52298	0.718027	-1.01792	0.000667509	0.0100783	-0.430901	0.0354095	0.177708	0.108672	0.705157	0.889226	-0.0912654	0.63163	0.715041
6720463M24Rik	-0.10384	0.791397	0.978114	-0.361485	0.311204	0.955127	-0.340483	0.309002	0.483464	-0.910244	0.0249829	0.179631	-1.47744	6.40265e-05	0.00192847	-0.12405	0.596032	0.806891	-0.598225	0.0449134	0.260905	-0.0700607	0.733429	0.799859
8030462N17Rik	-0.130613	0.71592	0.972886	0.270564	0.35307	0.960134	-0.0906066	0.770183	0.855596	0.0448816	0.920654	0.96324	0.545054	0.17849	0.374939	0.52319	0.0272647	0.152418	0.0198063	0.951966	0.988171	0.0648158	0.766105	0.825761
8430406I07Rik	-0.00610675	1	1	-0.31644	0.419555	0.961711	-0.441693	0.199347	0.364507	0.384604	0.369075	0.594651	1.62866	2.80588e-06	0.000183024	0.957048	7.37211e-05	0.00255464	0.46824	0.110303	0.402389	1.14637	2.33329e-08	2.02791e-07
8430410A17Rik	0.225827	0.560056	0.957503	0.100669	0.769396	0.995049	0.66699	0.0643379	0.17708	-0.65028	0.0703635	0.261148	-0.816405	0.013606	0.0795375	-0.33114	0.111607	0.342921	-0.378603	0.148972	0.466484	-0.0616084	0.729288	0.796423
8430410K20Rik	-0.573118	0.0906325	0.955693	-0.149717	0.627817	0.987654	-0.0887785	0.773672	0.85744	0.281914	0.48163	0.688758	0.242023	0.518375	0.708585	0.365017	0.181352	0.450222	0.100511	0.74921	0.912067	-0.0430805	0.869536	0.906978
8430419L09Rik	0.536259	0.309491	0.955693	0.277039	0.554945	0.980133	1.16351	0.0124812	0.0643066	-0.126646	0.771398	0.880438	0.210721	0.575597	0.752581	0.179487	0.47986	0.73361	-0.128726	0.682557	0.876924	0.221168	0.30785	0.40488
8430426H19Rik	-0.791299	0.0541655	0.955693	-0.800665	0.0364303	0.568714	-0.75956	0.04607	0.143189	-1.02911	0.0866471	0.287386	-0.923262	0.0260428	0.119498	0.138853	0.609483	0.815233	0.0273102	0.95506	0.989875	-0.489047	0.0389426	0.0723738
8430427H17Rik	-0.131626	0.875753	0.986758	0.562101	0.541435	0.979378	-0.322669	0.606946	0.743777	0.800435	0.176454	0.4006	0.475824	0.371216	0.585088	-0.192651	0.746683	0.89031	0.0521537	1	1	-0.485536	0.285874	0.380895
9030025P20Rik	0.868925	0.0610623	0.955693	0.885462	0.0193493	0.433819	0.113924	0.761339	0.850953	0.979889	0.0281619	0.187978	2.62067	4.94109e-11	1.82637e-08	0.939507	0.000394817	0.0092278	1.24474	0.000169843	0.0125573	0.608626	0.0212655	0.0429528
9030418K01Rik	0.573389	0.205085	0.955693	0.322218	0.446118	0.966629	-0.0550848	0.920331	0.953562	0.866202	0.0221097	0.173881	1.07415	0.002439	0.0243647	0.0610136	0.803483	0.919161	0.802019	0.00417512	0.0789161	0.783673	0.000109095	0.000424307
9030420J04Rik	0.210546	0.542291	0.957503	0.423967	0.194824	0.910963	0.584517	0.0614697	0.172162	0.0215017	0.958471	0.982592	0.4802	0.17798	0.374223	0.465948	0.0824244	0.290819	0.236236	0.439675	0.745066	0.413993	0.0623511	0.107215
9030425E11Rik	-0.130242	0.677641	0.968419	-0.0153144	0.971846	0.999189	-0.449097	0.0965449	0.227419	0.575889	0.0680301	0.256552	1.03895	0.000409619	0.00704828	0.596183	0.00366658	0.0429311	0.602912	0.0125339	0.140233	-0.340818	0.0647077	0.110674
9030617O03Rik	0.342652	0.494879	0.955693	0.700936	0.0922105	0.768802	1.89371	1.97567e-07	2.29269e-05	-0.768892	0.0711006	0.262032	-0.148683	0.694043	0.834022	-0.521061	0.026658	0.150139	-0.252892	0.405869	0.715901	-0.452871	0.0310407	0.0595628
9030624J02Rik	0.304265	0.365382	0.955693	-0.0503551	0.880846	0.996527	0.61256	0.0249124	0.0984654	-0.398459	0.221535	0.451024	-0.08611	0.767489	0.87869	-0.199563	0.287951	0.574062	-0.329038	0.16889	0.494578	-0.30985	0.0764259	0.127483
9030625A04Rik	-0.327955	0.396927	0.955693	0.161721	0.623563	0.986881	0.0284024	0.932888	0.960114	-1.31974	0.0163546	0.157244	-0.866502	0.0715299	0.216849	-0.4864	0.174113	0.440131	-0.757278	0.0589461	0.296496	-1.61154	4.1826e-10	4.92826e-09
9130008F23Rik	0.31524	0.515389	0.956456	0.40382	0.375904	0.960134	0.878704	0.0355998	0.121348	0.731706	0.105093	0.311706	1.03562	0.0146912	0.083694	1.04379	1.56923e-05	0.000711861	0.319445	0.350756	0.671889	1.54173	2.15137e-14	4.83573e-13
9130011E15Rik	0.314309	0.461406	0.955693	0.124601	0.736299	0.9929	1.05768	0.00503724	0.0365878	0.215938	0.542269	0.732319	-0.509814	0.131649	0.314848	0.519915	0.0151908	0.105354	0.280486	0.280351	0.611562	1.04155	1.14381e-08	1.04655e-07
9130011J15Rik	-0.318687	0.338996	0.955693	-0.262201	0.383639	0.960134	-0.429675	0.13214	0.277458	-1.65152	0.0164165	0.157351	-1.5821	0.00634812	0.04765	-0.785296	0.00218439	0.0300692	-1.00867	0.0130989	0.142559	-0.0718751	0.718099	0.788148
9130019O22Rik	0.269919	0.539114	0.957503	-0.934489	0.0514886	0.653761	0.127415	0.765481	0.853384	-0.200681	0.641991	0.80141	-0.0975717	0.794029	0.893596	-0.331585	0.180954	0.44957	-0.284154	0.363429	0.682284	-0.658421	0.00277392	0.00730442
9130023H24Rik	-0.466172	0.332731	0.955693	-0.95154	0.037602	0.577041	-0.825254	0.040732	0.132305	-0.638268	0.255745	0.48523	0.138473	0.756547	0.872555	1.09802	0.00032959	0.00806204	0.194824	0.624784	0.851241	-0.736919	0.00575274	0.0137317
9130024F11Rik	-1.55965	0.0300253	0.955693	-2.1946	0.000643154	0.0489975	-1.35824	0.0193931	0.0836041	1.91322	0.000513669	0.0347327	1.55465	0.00163526	0.0188451	0.554074	0.0737162	0.272679	0.957635	0.0264744	0.200189	0.495442	0.0787022	0.130625
9130227C08Rik	-0.0117787	1	1	-0.676384	0.104825	0.805774	0.0379274	0.912091	0.948155	0.591646	0.127554	0.341025	1.02598	0.00523202	0.0419065	0.643318	0.0080304	0.0715566	0.426374	0.135427	0.446573	0.422091	0.0376654	0.0702355
9130401M01Rik	-0.50289	0.202009	0.955693	-0.290174	0.414085	0.960673	-0.950184	0.00553332	0.0389141	0.540863	0.150816	0.368366	0.444075	0.198609	0.401076	-0.136809	0.521016	0.762402	-0.127265	0.665669	0.867511	0.428063	0.0161445	0.0338209
9130404D08Rik	0.27424	0.455035	0.955693	0.313797	0.363543	0.960134	0.824078	0.0126685	0.0650366	-0.296897	0.3844	0.607685	-0.538233	0.0853643	0.241	-0.0614458	0.778896	0.907046	-0.0960242	0.711972	0.892536	-0.16485	0.431093	0.530364
9230105E10Rik	0.618147	0.208326	0.955693	0.468838	0.320072	0.955127	1.28857	0.00249372	0.0231181	-0.638951	0.176065	0.400075	-0.885846	0.0287307	0.126314	-0.0326614	0.919079	0.969394	-0.138842	0.688594	0.880709	-0.511945	0.034607	0.0653382
9330159F19Rik	0.166891	0.693452	0.971263	0.648294	0.0816778	0.738518	0.585838	0.093788	0.223764	-0.319241	0.49379	0.697822	-0.822139	0.0559611	0.1871	-0.0277016	0.93741	0.977501	-0.156471	0.664239	0.866687	-0.441282	0.0874429	0.142604
9430008C03Rik	-0.11988	0.755408	0.974198	-0.144734	0.670605	0.990767	-0.485992	0.110863	0.248298	-0.380883	0.283301	0.513223	-0.418971	0.210187	0.414641	1.0618	1.40989e-07	1.40707e-05	0.593986	0.0195	0.170634	1.47338	2.23701e-15	5.75395e-14
9430015G10Rik	0.0722409	0.87107	0.986354	-0.693831	0.121815	0.830204	0.59448	0.123158	0.265066	-0.45805	0.196868	0.423973	0.0559978	0.861297	0.932378	0.201671	0.325689	0.610731	0.0434128	0.867299	0.960502	-0.119953	0.504114	0.601154
9430016H08Rik	-0.484419	0.182119	0.955693	-0.534676	0.110364	0.81513	-0.56713	0.0706685	0.188232	0.517909	0.201645	0.429454	0.667992	0.0684902	0.211293	0.439404	0.0835836	0.292622	0.213147	0.490128	0.781996	1.20407	1.06581e-07	8.18842e-07
9430020K01Rik	0.298834	0.317071	0.955693	0.261661	0.325909	0.956677	-0.0493439	0.866462	0.919568	0.357968	0.254788	0.484064	0.701889	0.0189405	0.0985536	0.396224	0.0460506	0.207487	0.396971	0.0979948	0.381042	-0.42184	0.0211961	0.0428646
9430038I01Rik	0.0953258	0.820313	0.981006	0.0296698	0.928899	0.996527	-1.08321	0.0101721	0.0565871	-0.0181629	0.973883	0.988945	-1.25674	0.00121192	0.015233	-0.320843	0.22121	0.496106	-0.2036	0.545328	0.809997	-0.0777373	0.74565	0.809396
9530008L14Rik	0.731414	0.396466	0.955693	1.46982	0.0476269	0.634439	-0.658738	0.351974	0.525401	0.738971	0.419297	0.638281	1.85296	0.00763544	0.0536254	1.55667	0.0159853	0.108822	0.587318	0.53715	0.804982	2.57085	8.77493e-07	5.59002e-06
9530058B02Rik	0.0960411	0.830393	0.981006	-0.23592	0.731747	0.9929	-0.932806	0.0932766	0.22281	0.83723	0.0518832	0.230325	-0.0532004	0.892052	0.948506	-0.161985	0.475767	0.731405	0.0514166	0.877135	0.963015	1.09426	3.60771e-07	2.52489e-06
9530068E07Rik	-0.0289948	0.92109	0.992307	0.121006	0.580223	0.982128	0.585805	0.00829986	0.0497518	0.352146	0.294216	0.523867	0.262294	0.388405	0.600398	-0.304328	0.115493	0.34865	-0.0524419	0.844883	0.950398	-0.593728	0.000761288	0.0023544
9530091C08Rik	1.57878	0.0179122	0.955693	2.05183	0.00113718	0.0720548	1.21987	0.0295019	0.108485	-0.964734	0.114834	0.324657	0.093369	0.863821	0.93388	0.288845	0.391598	0.665872	0.720517	0.107301	0.399279	-0.65889	0.0251276	0.049609
9630025I21Rik	-0.0368912	0.963356	0.998784	0.670805	0.0827028	0.741576	0.767172	0.0302486	0.109855	-0.562524	0.402277	0.622864	0.398423	0.417088	0.6251	0.671305	0.046781	0.209621	0.161506	0.732528	0.902993	0.667708	0.0232228	0.0463713
9630058J23Rik	0.11726	0.728875	0.973017	-0.348121	0.295269	0.949068	-0.251404	0.40364	0.574162	0.755728	0.0311498	0.194906	1.41749	2.12667e-05	0.000869845	0.717828	0.000675622	0.013405	0.428988	0.105792	0.396915	0.0800471	0.663617	0.741895
9930013L23Rik	0.859886	0.0624398	0.955693	0.377276	0.359348	0.960134	1.22295	0.00172268	0.0182003	0.58206	0.106576	0.313662	0.208147	0.55024	0.732377	0.38481	0.131419	0.374412	-0.0114971	0.968236	0.993489	-0.636414	0.0092147	0.020703
9930021J03Rik	-0.137569	0.727162	0.973017	-0.126068	0.726336	0.9929	-0.206028	0.519627	0.673369	-1.46608	0.0225324	0.175682	-2.38585	6.67311e-06	0.000354243	-0.435041	0.214744	0.49025	-0.782877	0.0826512	0.347673	-1.28098	6.50409e-05	0.000267563
A130010J15Rik	-0.699828	0.209412	0.955693	-0.914333	0.0777773	0.726796	-1.40095	0.00191888	0.0196263	-0.911997	0.0458285	0.221464	-0.321338	0.399854	0.609364	0.246022	0.364216	0.644077	-0.408766	0.235215	0.568389	0.0952834	0.68493	0.759343
A130022J15Rik	0.17717	0.631476	0.962838	0.240069	0.490309	0.973297	0.209467	0.509832	0.665636	-1.37991	0.0173485	0.160514	-1.30832	0.00621508	0.047012	-0.586576	0.0841244	0.293758	-0.643289	0.0916164	0.367201	-1.12273	1.21538e-06	7.47629e-06
A130040M12Rik	-0.0767258	0.78292	0.976016	0.284915	0.203614	0.917386	-0.221299	0.351315	0.524869	0.0370386	0.906367	0.956333	-0.0869796	0.763586	0.876547	-0.221412	0.242068	0.52331	-0.0277328	0.910764	0.974965	-1.87833	1.12452e-21	5.78491e-20
A130042E20Rik	1.12905	0.0712155	0.955693	0.955253	0.115335	0.821333	1.06052	0.0580481	0.165615	0.162774	0.708663	0.842641	1.19406	0.00170095	0.0192685	0.438281	0.0788064	0.282402	0.17665	0.569303	0.823487	-0.0433724	0.84279	0.885932
A230046K03Rik	-0.50744	0.158249	0.955693	-0.416094	0.21187	0.924379	-0.761539	0.0207056	0.0871172	-1.21719	0.0047393	0.0981291	-0.794959	0.0580084	0.191253	-0.337348	0.184905	0.455417	-0.675314	0.0318602	0.219921	-1.09417	4.65976e-08	3.82437e-07
A230051G13Rik	0.314783	0.618928	0.962615	-0.427108	0.54611	0.979378	0.681871	0.186873	0.34984	0.461999	0.284719	0.514618	0.171519	0.651642	0.805672	-0.103641	0.684783	0.857019	0.0457102	0.887523	0.966556	-0.244546	0.24069	0.331277
A230067G21Rik	0.117302	0.735353	0.974136	-0.0206909	0.960051	0.998816	0.74149	0.0132931	0.0668535	-0.69591	0.0875112	0.288266	-0.727178	0.0432933	0.16202	-0.0945547	0.66829	0.848646	0.0325072	0.913726	0.975188	-0.594021	0.00195587	0.0054026
A230072C01Rik	0.88046	0.0571965	0.955693	0.879951	0.0330111	0.54903	0.456973	0.201206	0.366645	-1.36919	0.0397446	0.211624	-0.414043	0.425083	0.631581	-0.221175	0.489018	0.740113	-0.133615	0.764047	0.917863	-0.803968	0.00394358	0.00989116
A2ld1	0.0711417	0.836383	0.981501	-0.0761557	0.832824	0.996172	-0.571244	0.0782325	0.200349	0.0773356	0.844084	0.919745	0.60769	0.139178	0.325271	0.0867384	0.743503	0.888322	0.134064	0.661656	0.865355	0.244049	0.306729	0.403793
A330021E22Rik	-0.25999	0.593504	0.961274	-0.338416	0.453217	0.967686	-0.477233	0.222942	0.391375	-0.177125	0.748475	0.866262	-0.0912762	0.852254	0.927939	0.497015	0.0951788	0.314323	0.342806	0.344343	0.665945	0.017142	0.95312	0.967467
A430005L14Rik	0.408684	0.373725	0.955693	-0.69736	0.152196	0.859411	-0.0436095	0.926386	0.955689	0.466299	0.274433	0.503371	0.92593	0.0146279	0.0836598	0.136105	0.567988	0.791925	-0.0209589	0.948635	0.987008	0.463152	0.0157154	0.0330886
A430033K04Rik	-0.709791	0.130583	0.955693	-0.548986	0.193938	0.910963	-0.217357	0.592048	0.732355	-0.24563	0.606768	0.777947	0.579689	0.123721	0.303206	0.594306	0.031614	0.165259	0.26569	0.446948	0.750807	-0.525433	0.0209614	0.0424675
A430105I19Rik	0.0992728	0.798286	0.978114	-0.794342	0.0713425	0.703556	0.0621861	0.860411	0.915644	0.746349	0.0288858	0.18916	0.724564	0.028531	0.12586	0.782404	8.04449e-05	0.00272223	0.823777	0.000842633	0.0309172	-1.0792	4.67802e-09	4.60421e-08
A430107O13Rik	-0.51834	0.153012	0.955693	-0.383722	0.238936	0.939246	-1.53348	1.64439e-05	0.000777201	-0.874309	0.0799792	0.276766	-0.0171319	0.967105	0.98642	0.176332	0.433744	0.698189	-0.179314	0.594982	0.835974	-1.31973	4.89789e-12	7.84606e-11
A430110N23Rik	0.145032	0.780859	0.974731	-0.425726	0.455593	0.967686	0.243615	0.610335	0.745824	1.31453	0.00101409	0.0481933	1.21629	0.000929788	0.0127288	0.584214	0.0172747	0.114249	1.05949	0.000152397	0.0116994	-0.900382	0.000181196	0.000667281
A530054K11Rik	-0.765264	0.0551379	0.955693	-0.380145	0.293105	0.949068	-0.362778	0.323769	0.498105	-0.67239	0.280174	0.509593	0.120559	0.834366	0.916866	0.661259	0.101043	0.325189	0.458846	0.358914	0.679234	-0.115406	0.829566	0.874898
A530082C11Rik	0.412799	0.277344	0.955693	0.521129	0.139415	0.849468	0.217878	0.504841	0.661067	-0.840735	0.117585	0.328067	0.63894	0.188278	0.388632	-0.267958	0.37151	0.650013	-0.328278	0.418336	0.727604	-1.23052	1.4297e-05	6.81396e-05
A630007B06Rik	-0.295701	0.347171	0.955693	0.150969	0.565201	0.980133	-0.00736505	0.983561	0.991609	-0.53369	0.402094	0.622864	0.722354	0.155931	0.34636	1.27005	0.00010697	0.00339989	0.00648771	0.989361	0.99988	1.25514	2.10691e-05	9.62773e-05
A630033E08Rik	-0.704036	0.0655553	0.955693	-0.470668	0.168789	0.881022	-0.0520933	0.889278	0.934151	0.601097	0.228322	0.456601	0.455943	0.313785	0.528625	1.0597	0.000921945	0.0168214	0.38978	0.312209	0.639406	2.12114	1.33294e-13	2.70381e-12
A630047E20Rik	-0.665564	0.113023	0.955693	-0.876668	0.026827	0.507072	-1.22007	0.00187161	0.0193509	-0.024788	0.95527	0.981529	0.594532	0.159066	0.351367	0.148893	0.528102	0.766277	0.348044	0.273774	0.6069	-0.860101	4.94392e-05	0.000208804
A630055G03Rik	-0.163761	0.707768	0.972787	-0.0229403	0.959961	0.998816	-0.269037	0.431652	0.598069	0.129663	0.733092	0.857609	-0.341341	0.329764	0.545056	-0.13598	0.56983	0.792878	0.542229	0.0451041	0.261418	-0.583512	0.00853519	0.0194211
A730011L01Rik	0.47109	0.435607	0.955693	0.0687665	0.877753	0.996527	0.148711	0.767795	0.854343	1.01275	0.0121716	0.143585	0.870431	0.0217523	0.107204	0.649797	0.00772563	0.0695237	0.668735	0.0245076	0.191681	1.01207	2.19528e-06	1.27229e-05
A830007P12Rik	0.596803	0.242957	0.955693	0.0647169	0.867608	0.996527	0.598398	0.169841	0.328237	-0.385037	0.324544	0.553288	0.31847	0.379767	0.593033	-0.435891	0.0725972	0.270932	-0.1419	0.62205	0.850536	-2.21114	6.00855e-21	2.85549e-19
A830018L16Rik	0.802165	0.186896	0.955693	0.9556	0.0642627	0.68792	0.281174	0.615662	0.749855	-1.18483	0.0419824	0.215712	-0.68305	0.162805	0.35602	-0.146358	0.713527	0.872672	0.169937	0.746309	0.911109	-0.659116	0.0430082	0.078637
A830023I12Rik	0.124574	0.762895	0.974201	0.255152	0.533829	0.979378	-0.54528	0.200419	0.365932	-0.963296	0.173466	0.397182	-0.309866	0.575416	0.752452	0.216696	0.517479	0.759588	-0.303413	0.508307	0.790213	-0.132017	0.68402	0.758839
A830080D01Rik	-0.57424	0.159729	0.955693	-0.38411	0.313239	0.955127	-0.63002	0.0779203	0.199857	0.285205	0.507746	0.707524	-0.46494	0.220905	0.427088	0.611906	0.0149392	0.104564	0.406195	0.189634	0.520934	0.107562	0.616432	0.701482
A930001N09Rik	-0.373638	0.336253	0.955693	-1.15111	0.00242743	0.121129	-0.420594	0.198514	0.363754	0.144394	0.766357	0.878093	1.13665	0.00631194	0.0474703	0.611446	0.0431604	0.199078	0.306414	0.432569	0.739522	-0.0267946	0.93299	0.952654
A930041I02Rik	-0.713392	0.10182	0.955693	-0.744245	0.0694385	0.696238	-0.982645	0.0112775	0.0606409	-0.364289	0.430458	0.647861	-0.406625	0.372503	0.58663	0.126189	0.687254	0.859067	0.348908	0.335953	0.65806	-0.471522	0.0427315	0.0782497
AA408296	0.32028	0.402108	0.955693	0.220603	0.524116	0.978125	0.629271	0.0562406	0.162502	-0.406241	0.245112	0.474808	-0.394371	0.219605	0.425399	-0.0726116	0.719832	0.875559	-0.411556	0.106772	0.398592	0.433396	0.0184104	0.0379305
AA415398	-1.05147	0.086748	0.955693	-0.526122	0.392892	0.960134	-1.12683	0.0342913	0.1185	-0.178027	0.804467	0.900368	0.830124	0.101988	0.268631	1.24323	0.0013432	0.021587	0.196898	0.753727	0.9132	1.36263	7.01469e-05	0.000286326
AA960436	0.0607056	0.891013	0.988926	-0.505992	0.282767	0.948861	0.34387	0.402653	0.573695	0.293194	0.387236	0.610206	0.415989	0.184163	0.382825	0.134759	0.505104	0.751146	0.279222	0.278312	0.609987	0.870285	1.0325e-06	6.44428e-06
AA987161	-0.380148	0.337652	0.955693	-0.129943	0.712333	0.992764	-0.082369	0.813775	0.883084	-0.799706	0.236998	0.466885	0.46307	0.400458	0.609792	0.894469	0.0157773	0.107996	0.404068	0.456863	0.758324	0.235162	0.546463	0.638682
Aaas	0.297522	0.418	0.955693	0.21661	0.498545	0.974559	0.749038	0.0161192	0.0752545	-0.273023	0.389013	0.612262	-0.551048	0.0626851	0.200824	0.0309058	0.872339	0.949187	0.32384	0.17216	0.499394	0.101593	0.559026	0.649863
Aacs	0.0194312	0.935519	0.995016	-0.28434	0.255505	0.93973	-0.103804	0.698764	0.808823	0.645703	0.0873138	0.288159	0.773021	0.0252524	0.117	-0.352578	0.127991	0.3697	-0.205303	0.476077	0.771165	-1.23154	3.27893e-09	3.33575e-08
Aagab	0.274782	0.452028	0.955693	-0.138747	0.723433	0.9929	0.698185	0.030657	0.110822	-0.013241	0.970044	0.987559	-0.0193778	0.951905	0.978979	0.137991	0.506607	0.752596	-0.132006	0.609544	0.844896	-0.204404	0.257757	0.350178
Aak1	0.10839	0.665014	0.967797	0.1785	0.426963	0.962959	0.949048	4.34031e-05	0.00155814	0.815821	0.0137836	0.150671	1.21443	7.09357e-05	0.00206625	0.314334	0.099792	0.322772	0.664155	0.00491449	0.0857579	-0.52242	0.00302579	0.00785776
Aamp	0.3341	0.323386	0.955693	-0.0512173	0.888119	0.996527	0.926199	0.00207309	0.0206582	0.843543	0.0296291	0.191585	0.739233	0.0434289	0.162269	-0.0914259	0.664997	0.847563	0.292169	0.310684	0.638644	0.381404	0.0410545	0.0757066
Aars	0.34702	0.262829	0.955693	0.239034	0.378003	0.960134	0.741233	0.00600579	0.0407821	0.0880547	0.781454	0.885969	0.488776	0.1001	0.265208	0.525936	0.00602058	0.0593143	0.220783	0.346251	0.668005	0.366669	0.0406248	0.075039
Aars2	0.363637	0.486454	0.955693	-0.311915	0.576374	0.981301	1.30994	0.0027092	0.024513	0.652084	0.109888	0.318295	0.00426802	0.99103	0.997124	-0.199888	0.412599	0.68118	0.0885298	0.778329	0.922957	-0.43076	0.0338489	0.0641375
Aarsd1	0.470343	0.388553	0.955693	-0.22845	0.685074	0.991213	1.17676	0.0166778	0.0765616	0.580784	0.137167	0.351137	0.126894	0.722617	0.852449	-0.300236	0.184603	0.455123	-0.166397	0.578963	0.828572	0.0571119	0.764789	0.825146
Aasdhppt	-0.16024	0.68312	0.97014	-0.348228	0.301022	0.95446	-0.916021	0.0056943	0.0394099	-0.0722231	0.86502	0.933387	0.143014	0.692269	0.833354	0.0294529	0.904256	0.963502	-0.198929	0.498472	0.785529	0.826495	1.7723e-05	8.22675e-05
Aatf	0.0255324	0.908717	0.991053	0.0507848	0.812081	0.996172	-0.444062	0.0536359	0.157985	0.00370856	0.991566	0.997764	0.0543438	0.871613	0.938168	0.334645	0.15817	0.417713	0.0823816	0.765963	0.918669	1.0679	1.01895e-06	6.36762e-06
Abca1	0.0244962	0.933171	0.994867	-0.380519	0.411475	0.960673	-0.0605232	0.881989	0.929588	-1.04451	0.0208431	0.171721	-1.40234	0.000406561	0.0070369	-0.82484	0.00217795	0.0300636	-0.981355	0.00400647	0.0770416	-2.26242	3.52072e-18	1.3062e-16
Abca2	0.554762	0.290922	0.955693	-0.00965576	1	1	1.89833	2.00468e-05	0.000895765	0.341089	0.353815	0.582013	0.425158	0.225684	0.432889	-0.211458	0.412206	0.681169	-0.00171566	0.995267	1	-0.920165	0.000230096	0.000821594
Abca5	0.154783	0.63195	0.962838	0.152422	0.603045	0.986881	0.0391202	0.885845	0.932199	-0.12368	0.778586	0.884898	-0.182533	0.635864	0.796826	0.332575	0.194659	0.46836	0.0310022	0.928128	0.981442	0.2787	0.20614	0.291111
Abca7	0.666197	0.23631	0.955693	-0.0814927	0.919449	0.996527	1.94146	2.41499e-05	0.0010256	0.518659	0.175094	0.399141	0.242336	0.505661	0.698066	-0.0313975	0.89816	0.961205	0.1308	0.6417	0.856515	-0.677554	0.00217192	0.00591588
Abca8b	0.0579877	0.90509	0.991053	0.372568	0.512051	0.975024	1.15828	0.0226401	0.092556	-0.184415	0.735124	0.859079	0.765666	0.0713193	0.216343	1.27205	2.64586e-05	0.00110948	0.223171	0.590298	0.832792	1.52787	5.83852e-09	5.64617e-08
Abcb10	0.278515	0.399279	0.955693	0.284278	0.346662	0.960134	0.203527	0.491534	0.649048	-0.0103208	0.975168	0.989746	-0.279778	0.358677	0.572723	-0.290178	0.14875	0.402528	-0.0178285	0.942614	0.985366	-0.734434	3.76563e-05	0.000162618
Abcb1b	-0.33596	0.272458	0.955693	0.219786	0.393558	0.960134	-0.0301334	0.910953	0.9479	-0.738429	0.047574	0.22364	-0.698021	0.0361704	0.146205	-0.135261	0.528487	0.766502	-0.599511	0.0278597	0.205189	-0.0485877	0.798855	0.852591
Abcb6	0.283087	0.480013	0.955693	0.551017	0.127853	0.835625	1.69819	9.10573e-08	1.18141e-05	0.115225	0.766756	0.878093	0.0446344	0.903146	0.954	-0.123255	0.613159	0.817456	-0.334595	0.259368	0.592975	0.126936	0.568826	0.658877
Abcb7	-0.277473	0.437532	0.955693	-0.246348	0.445104	0.966496	-0.409217	0.193393	0.358149	-0.77246	0.113972	0.324057	-0.273564	0.485038	0.679871	-0.260042	0.413724	0.682474	-0.437977	0.239353	0.571471	-0.480293	0.0676024	0.115061
Abcb8	0.736255	0.194414	0.955693	-0.688347	0.211967	0.924379	1.07982	0.0245576	0.097769	0.307577	0.380968	0.605065	-0.128038	0.710159	0.844504	0.0596917	0.78444	0.910845	0.0841371	0.753001	0.913006	0.180629	0.367188	0.466523
Abcc1	0.266676	0.389729	0.955693	0.573961	0.0353963	0.560723	1.12134	0.000272985	0.00555998	-0.518584	0.119358	0.33027	-0.531124	0.0806911	0.232678	-0.0550623	0.771309	0.902317	-0.145541	0.549789	0.812152	-0.254668	0.174256	0.252222
Abcc10	0.099566	0.832086	0.981006	-0.563173	0.406114	0.960673	1.09276	0.0369287	0.124341	0.879847	0.0395882	0.211616	0.925772	0.0184063	0.0965946	0.695653	0.00881757	0.0759464	0.455057	0.15428	0.47477	0.738579	0.00227231	0.00616072
Abcc4	-0.20008	0.632222	0.962838	0.114315	0.744348	0.9929	0.805992	0.0130421	0.0661468	-0.101767	0.80774	0.902412	-0.0803629	0.825784	0.912689	0.170935	0.468945	0.725142	-0.253406	0.397669	0.708536	1.60296	4.00083e-16	1.11844e-14
Abcc5	-0.185312	0.64172	0.962838	0.261579	0.431574	0.963272	0.436563	0.165792	0.32348	-0.143303	0.651725	0.807376	1.51077	3.63696e-07	3.42423e-05	-1.21475	0.00837788	0.0734721	-1.06265	0.0123624	0.139478	-0.603832	0.124148	0.191292
Abcd2	-0.365376	0.440094	0.955693	-1.12114	0.0145801	0.38393	-1.26836	0.00211943	0.0210073	-1.13261	0.069233	0.258684	-1.24877	0.00880702	0.0592677	0.271858	0.281905	0.567335	-0.233967	0.490111	0.781996	-1.21051	7.02412e-08	5.55913e-07
Abcd3	-0.208497	0.464434	0.955693	-0.201747	0.437331	0.965612	0.0451431	0.855399	0.912645	-0.750164	0.0350589	0.202959	-0.725441	0.035207	0.143641	-0.197973	0.366712	0.645653	-0.688597	0.00949115	0.123611	-0.819419	8.99402e-06	4.51284e-05
Abcd4	-0.721659	0.18662	0.955693	-0.854943	0.0908024	0.766011	0.405658	0.345585	0.519967	0.063007	0.869781	0.936701	-0.214039	0.551627	0.733445	0.195596	0.409542	0.678603	0.0285533	0.922474	0.978558	0.233832	0.263592	0.356553
Abce1	-0.433923	0.180066	0.955693	-0.131958	0.646099	0.989904	-1.0071	0.000388938	0.00700651	-0.937941	0.0306101	0.193225	-0.742525	0.0636305	0.202205	-0.0897107	0.752603	0.893302	-0.361707	0.257374	0.591242	-0.265688	0.234949	0.325111
Abcf1	-0.0476351	0.870742	0.986354	0.121719	0.580743	0.982245	-0.304041	0.18362	0.345304	0.455066	0.174818	0.398967	0.420257	0.184062	0.382696	0.0780924	0.695576	0.863751	0.301119	0.229125	0.560457	-0.104636	0.546883	0.639022
Abcf2	0.31125	0.27666	0.955693	0.553802	0.0292701	0.5264	0.406704	0.112775	0.250912	-0.181839	0.565864	0.749488	-0.452449	0.114023	0.287797	-0.191721	0.302239	0.587295	-0.0889413	0.715238	0.894047	0.231237	0.187439	0.2685
Abcf3	0.467687	0.304718	0.955693	0.322548	0.414005	0.960673	1.25979	0.000680801	0.0100212	-0.248171	0.448218	0.663498	-0.178865	0.549481	0.732328	0.013207	0.946646	0.980136	-0.140363	0.555199	0.815676	0.0623206	0.723153	0.792241
Abcg2	-0.0112399	0.985687	1	-0.0252037	0.940347	0.997148	-0.809045	0.00413103	0.0321934	-1.49498	0.0219726	0.173582	-1.36751	0.021084	0.105262	-0.868632	0.0218028	0.132034	-1.24464	0.0103599	0.127487	-1.17274	1.5043e-05	7.13542e-05
Abhd10	-0.277756	0.56244	0.957503	-0.450428	0.316351	0.955127	-0.0941077	0.833862	0.897729	-0.710348	0.118446	0.329032	-0.560519	0.182494	0.380489	0.133859	0.605935	0.813714	-0.328496	0.434263	0.740465	0.373088	0.0738753	0.123974
Abhd11	0.00671408	0.963803	0.998784	0.202054	0.639293	0.989904	0.165699	0.659009	0.78092	0.0471172	0.897965	0.951246	0.0234308	0.945721	0.974728	0.129822	0.542073	0.77439	-0.0316772	0.905604	0.972736	0.788039	1.60202e-05	7.55011e-05
Abhd12	0.730904	0.170723	0.955693	0.266302	0.557265	0.980133	1.58074	0.000409719	0.00731485	0.218133	0.515682	0.712517	-0.319726	0.318044	0.533548	-0.132724	0.498301	0.746367	-0.286679	0.252798	0.586182	0.161094	0.362262	0.461498
Abhd13	-0.406559	0.242464	0.955693	-0.245621	0.426551	0.962959	-0.575889	0.0512378	0.153698	-1.02487	0.0242992	0.178182	-1.48928	0.00397921	0.0346229	-0.484746	0.0601213	0.242489	-0.817918	0.0069797	0.10409	-1.04321	5.29045e-06	2.80248e-05
Abhd14a	0.705321	0.240441	0.955693	-0.0302368	0.975362	0.999293	0.979012	0.0315982	0.113191	0.0999868	0.800018	0.898411	-0.0813373	0.831941	0.915411	-0.306357	0.239419	0.520226	-0.251397	0.425381	0.73384	0.33729	0.150069	0.223405
Abhd2	0.378488	0.437424	0.955693	0.0956442	0.817261	0.996172	1.13849	0.016323	0.0756987	0.245618	0.47228	0.681357	0.575005	0.0654642	0.205386	0.246935	0.254666	0.53628	0.443525	0.0786497	0.340753	-1.15198	5.87737e-09	5.66846e-08
Abhd4	0.701431	0.183065	0.955693	0.883007	0.0557026	0.670959	3.23897	1.96578e-13	2.09673e-10	-0.0148083	0.966021	0.985373	0.128897	0.672432	0.819899	0.226152	0.265183	0.54795	0.327478	0.188045	0.519624	0.144597	0.432709	0.532032
Abhd5	0.0803956	0.805912	0.979881	0.195246	0.545868	0.979378	0.217961	0.48174	0.641094	-0.0985917	0.786256	0.889563	-0.0730825	0.820597	0.9096	0.29863	0.160503	0.420126	0.149373	0.565927	0.821667	1.04603	1.78289e-08	1.58162e-07
Abhd6	-0.351916	0.505391	0.955693	-0.213201	0.666545	0.990689	0.342367	0.384652	0.558163	-0.934306	0.0558978	0.236381	-0.929453	0.0300803	0.129286	-0.40714	0.12294	0.360527	-0.671921	0.0539614	0.283848	0.228973	0.271649	0.365028
Abi1	-0.14232	0.618228	0.962615	-0.315148	0.211428	0.924379	0.0776145	0.751199	0.844178	0.174195	0.586984	0.764565	0.293504	0.310451	0.525394	0.681044	0.000526493	0.0112034	0.769315	0.00128501	0.0390988	0.787217	2.71027e-05	0.000121294
Abi2	-0.0713421	0.814631	0.981006	0.113339	0.632491	0.988596	-0.407177	0.106329	0.241448	0.117978	0.73631	0.85976	0.453801	0.159214	0.351487	0.0142435	0.950367	0.98195	0.267516	0.310222	0.638644	-1.35544	3.58324e-07	2.51129e-06
Abl1	0.0858957	0.764079	0.974201	0.0421111	0.86443	0.996527	0.512648	0.0642484	0.176969	0.894907	0.0146052	0.153949	0.388597	0.236666	0.446236	0.176992	0.412342	0.681169	0.529737	0.0512172	0.276595	-0.552343	0.00398219	0.00997297
Abl2	0.164615	0.52993	0.957503	-0.0350706	0.895189	0.996527	0.352415	0.153381	0.306774	-0.091612	0.782917	0.887194	0.156838	0.594289	0.766181	-0.0553063	0.771199	0.902294	0.286481	0.246087	0.579617	-1.29257	2.73551e-12	4.53495e-11
Ablim1	-0.229052	0.666305	0.967797	-0.664259	0.19358	0.910963	-0.712871	0.10945	0.246238	-0.333029	0.389567	0.612361	0.199932	0.56357	0.742891	-0.192493	0.395007	0.668645	-0.388754	0.180149	0.509895	-1.65295	8.83001e-15	2.09818e-13
Abr	-0.1052	0.728951	0.973017	0.292823	0.241347	0.93973	0.801488	0.0010702	0.013401	-0.226231	0.492782	0.6969	-0.0918019	0.756454	0.872555	0.203319	0.282863	0.568389	0.316848	0.18588	0.516306	-0.989448	3.17496e-08	2.68299e-07
Abt1	0.760617	0.0358877	0.955693	0.981888	0.00117652	0.0729295	0.499908	0.0903848	0.218306	0.145281	0.679548	0.822545	0.289658	0.367208	0.580967	0.0752882	0.72068	0.875768	-0.119745	0.649673	0.860597	0.375563	0.0494974	0.0884642
Abtb2	-0.380475	0.373703	0.955693	-0.705769	0.0657654	0.68792	0.0142724	0.973501	0.984972	0.810745	0.0360818	0.203803	0.942265	0.00750317	0.0529506	0.282624	0.241334	0.522567	0.13767	0.635701	0.855596	-0.243377	0.253718	0.345491
Acaa1a	-0.556505	0.21671	0.955693	-0.357099	0.395432	0.960134	0.0170994	0.968506	0.982446	0.491704	0.217604	0.447026	0.0406366	0.915995	0.959651	0.281439	0.268251	0.551215	-0.0796299	0.792323	0.930104	1.15855	1.72407e-09	1.84059e-08
Acaa2	0.237818	0.493445	0.955693	0.111868	0.71893	0.9929	-0.158582	0.636673	0.76462	-0.0610178	0.85425	0.926218	-0.193032	0.518189	0.708525	0.0172926	0.932206	0.975099	-0.162933	0.503963	0.788122	0.137307	0.434448	0.533833
Acaca	-0.00767301	0.989363	1	0.19438	0.390971	0.960134	0.0160021	0.942728	0.966169	-0.357837	0.276472	0.505994	-0.133104	0.653446	0.807163	-0.390567	0.0506749	0.219313	-0.167573	0.496043	0.784336	-1.92596	3.18872e-23	1.90559e-21
Acad10	0.0376649	0.93824	0.995061	-0.476681	0.54513	0.979378	1.18489	0.0546245	0.159681	0.377433	0.42491	0.643393	1.04908	0.010661	0.0675951	0.594724	0.0427284	0.197971	0.164305	0.634927	0.855596	0.662973	0.00646166	0.0151889
Acad11	0.195684	0.653407	0.964426	-0.335187	0.451556	0.967686	0.776158	0.0306665	0.110822	0.0845125	0.845866	0.920382	0.297173	0.42667	0.632714	0.114068	0.652214	0.838742	-0.353304	0.257752	0.591347	0.765609	0.000297938	0.00103316
Acad8	-0.674744	0.132571	0.955693	-0.637924	0.115914	0.821607	-0.389963	0.269988	0.443861	-0.565116	0.153097	0.371573	-0.827821	0.0237269	0.112652	-0.0692611	0.764819	0.8994	-0.429278	0.126617	0.433151	0.788583	4.52388e-05	0.000192694
Acad9	0.214666	0.501017	0.955693	0.422894	0.111481	0.81513	-0.338651	0.203685	0.36973	-0.694307	0.0425331	0.216461	-0.746398	0.0219391	0.107699	-0.201573	0.321482	0.60696	-0.403734	0.103349	0.392337	-0.114856	0.54336	0.636311
Acadl	-0.420641	0.196462	0.955693	-0.231047	0.440274	0.966496	0.304568	0.289576	0.464103	-0.568551	0.156306	0.375254	-0.266065	0.650404	0.805215	0.0241536	0.926487	0.97269	-0.264831	0.383551	0.698638	-0.0124816	0.958681	0.971729
Acadm	-0.153391	0.631111	0.962838	-0.243175	0.397272	0.960134	-0.0643369	0.824392	0.891282	-0.784019	0.166937	0.389077	-0.387799	0.440069	0.643688	0.362402	0.174417	0.440344	-0.0428768	0.897149	0.970048	0.12833	0.602742	0.689361
Acads	0.223208	0.585284	0.96034	-0.127128	0.779547	0.995877	0.573902	0.135854	0.282521	0.414076	0.258456	0.487768	-0.221716	0.518269	0.708537	-0.174303	0.424305	0.689331	0.0512076	0.854438	0.955011	-0.272105	0.136767	0.206872
Acadsb	0.141855	0.668935	0.967922	0.0622932	0.829533	0.996172	-0.199128	0.538485	0.688896	-0.526239	0.190609	0.417569	-0.184635	0.597911	0.768863	-0.00743859	0.97367	0.992465	-0.142862	0.626608	0.8519	-0.1782	0.366993	0.466338
Acadvl	0.197328	0.636565	0.962838	0.0356346	0.906311	0.996527	1.13549	0.000657213	0.00977494	0.100755	0.755456	0.871249	0.315655	0.320843	0.535659	0.182552	0.403476	0.67453	0.0389385	0.874565	0.962523	-0.0925567	0.614451	0.699625
Acap2	-0.299222	0.303964	0.955693	-0.125019	0.64393	0.989904	-0.338882	0.188331	0.35169	0.0125663	0.969387	0.987293	-0.0502538	0.866062	0.934917	0.384963	0.0417283	0.195058	0.157802	0.503387	0.787918	-0.328776	0.0613863	0.105919
Acap3	0.631757	0.360781	0.955693	0.243433	0.693419	0.991213	1.34426	0.0324365	0.114875	0.594577	0.102633	0.308266	0.412841	0.231769	0.440001	-0.17915	0.399538	0.6715	0.31693	0.235786	0.569216	-0.55857	0.00491041	0.0119702
Acat1	-0.313979	0.30767	0.955693	-0.13844	0.624339	0.986881	-0.631266	0.0237549	0.0955942	-0.31551	0.369843	0.595078	0.186178	0.542752	0.726777	0.250707	0.188819	0.460159	0.334453	0.175217	0.503176	0.19749	0.260561	0.353075
Acat2	-0.0204682	0.951999	0.998377	0.146613	0.524209	0.978125	0.0609346	0.788225	0.866544	-0.700232	0.0304141	0.19264	-0.752714	0.0106811	0.0675951	-0.955826	2.05273e-06	0.000142265	-0.717193	0.00437988	0.0804813	-3.00413	4.79004e-42	1.29202e-39
Acbd3	-0.0511501	0.869086	0.986354	0.197626	0.410807	0.960673	-0.240861	0.353026	0.526558	-0.361262	0.323947	0.552554	-0.104164	0.756813	0.872555	-0.0558638	0.798249	0.916533	-0.309039	0.279667	0.610875	-0.0849917	0.63177	0.715041
Acbd4	-0.327496	0.565612	0.957503	-0.14476	0.770049	0.995049	-0.218402	0.625541	0.757082	0.66842	0.111008	0.320235	0.287022	0.452063	0.653629	0.489869	0.0360621	0.179501	0.378172	0.202747	0.5369	0.867529	8.87995e-06	4.46458e-05
Acbd5	-0.579496	0.103138	0.955693	-0.366538	0.248149	0.93973	-0.76243	0.0226019	0.0924836	0.793224	0.0439239	0.218692	0.960694	0.00668714	0.0492165	0.468976	0.058468	0.239046	0.437846	0.137461	0.449496	0.281924	0.207935	0.293189
Acbd6	0.233098	0.506939	0.955693	0.16376	0.607173	0.986881	0.466715	0.13246	0.27772	0.901921	0.0157863	0.156256	0.186805	0.55682	0.737445	0.224131	0.312875	0.597731	0.0564911	0.856387	0.955818	1.48282	4.72076e-09	4.64169e-08
Accn2	0.228094	0.635676	0.962838	-0.397497	0.449221	0.966629	-0.547792	0.215621	0.38372	0.741614	0.0344791	0.201864	0.742763	0.0266472	0.121212	0.0293086	0.908407	0.964539	0.42797	0.130299	0.438726	-0.937717	4.83111e-05	0.000204732
Accs	-0.0982519	0.87806	0.987001	-0.817249	0.188167	0.900673	0.28825	0.645427	0.770866	-0.203719	0.649453	0.805761	-0.776398	0.0465943	0.169129	1.16787	1.27188e-05	0.000619187	0.398716	0.216437	0.548512	1.52175	1.41015e-11	2.10049e-10
Acd	0.337133	0.453788	0.955693	0.0367922	0.913807	0.996527	0.721671	0.0739527	0.193358	0.815559	0.0149741	0.154526	1.27251	0.000185705	0.00403778	0.368214	0.0608285	0.244392	0.619964	0.0101839	0.126817	1.03384	7.51588e-09	7.13009e-08
Acer3	-0.252141	0.483252	0.955693	-0.0447668	0.895376	0.996527	-0.902022	0.00412149	0.032185	-0.428392	0.322121	0.551587	-0.404431	0.27967	0.493903	-0.417903	0.103557	0.329119	-0.686733	0.0270359	0.202414	0.257453	0.201519	0.285676
Acin1	0.237131	0.462107	0.955693	-0.0310623	0.913047	0.996527	0.274377	0.29757	0.471839	0.988336	0.00599459	0.110569	0.788243	0.0158268	0.0877877	0.187787	0.364143	0.644077	0.683461	0.0112659	0.132289	0.170773	0.341861	0.439693
Acly	0.378756	0.261146	0.955693	0.254708	0.373257	0.960134	0.561114	0.0543907	0.159344	0.0661002	0.833301	0.913887	0.198767	0.505966	0.698244	-0.259604	0.177983	0.445553	-0.232877	0.315455	0.642392	-1.44134	2.1931e-14	4.91846e-13
Acmsd	-0.209066	0.837857	0.981501	-0.16012	0.809625	0.996172	-0.443547	0.488748	0.646826	-0.0585088	1	1	-0.722424	0.294139	0.509355	-0.324781	0.556559	0.786416	-0.524352	0.470336	0.769249	-1.2246	0.0308463	0.0592468
Acn9	-0.202028	0.796173	0.978114	-0.149917	0.861277	0.996527	-0.766166	0.182364	0.343719	-0.478967	0.316487	0.546555	-0.504268	0.23179	0.440001	0.0381326	0.908644	0.964539	-0.736118	0.043827	0.256685	1.16439	1.12359e-05	5.49946e-05
Aco1	0.282871	0.416925	0.955693	0.32744	0.309803	0.955127	0.485191	0.125444	0.268194	-0.204801	0.500999	0.702812	-0.025305	0.931666	0.967032	-0.217107	0.247629	0.529962	-0.230082	0.325613	0.651706	-0.340753	0.0544243	0.0957944
Aco2	0.445898	0.206192	0.955693	0.311454	0.327831	0.957867	1.079	0.000595713	0.00911843	-0.0676002	0.829944	0.912431	0.229301	0.442182	0.645266	-0.1065	0.573708	0.794892	-0.00959688	0.967528	0.993489	-0.293751	0.102454	0.162843
Acot1	-0.590996	0.173555	0.955693	-0.157267	0.689474	0.991213	-0.800976	0.0306624	0.110822	-0.0739906	0.868821	0.935971	-0.51583	0.169676	0.363677	-0.328868	0.207282	0.480753	-0.476297	0.14098	0.45433	-0.432523	0.057593	0.100468
Acot13	-0.250977	0.425981	0.955693	-0.169314	0.552305	0.980133	-0.711901	0.0336616	0.117422	-0.915352	0.0360542	0.203803	-0.0304005	0.939902	0.971716	-0.307184	0.206849	0.480118	-0.32935	0.306994	0.636833	0.500921	0.00980177	0.0218987
Acot2	0.0750962	0.831779	0.981006	0.0704261	0.832364	0.996172	-0.431565	0.306379	0.481182	0.497921	0.170908	0.394052	0.955787	0.00413628	0.035464	1.79145	3.85124e-18	2.74538e-15	0.890785	0.00482061	0.0847874	2.04341	1.71494e-27	1.40288e-25
Acot7	0.358473	0.269363	0.955693	0.229614	0.430921	0.963272	0.967599	0.000626921	0.00946546	0.072285	0.825074	0.909258	0.523401	0.0964432	0.259435	-0.423985	0.0227204	0.134251	-0.243629	0.310004	0.638619	-0.2265	0.188307	0.269551
Acot8	1.02626	0.152278	0.955693	0.753738	0.246505	0.93973	1.82668	0.00201872	0.0203504	1.15754	0.032555	0.197747	1.17896	0.0140587	0.0814144	0.445617	0.190518	0.462726	0.492895	0.244421	0.577883	0.8775	0.00593426	0.0141043
Acot9	-0.214184	0.505536	0.955693	-0.0768717	0.799831	0.996172	-0.551228	0.050969	0.153307	0.560287	0.186711	0.413679	-0.0340093	0.931924	0.967042	-0.252704	0.302887	0.587638	-0.21389	0.523187	0.797595	0.31127	0.162012	0.237437
Acox1	0.454753	0.20378	0.955693	0.222043	0.490648	0.973297	0.928566	0.00360475	0.0294575	-0.00768375	0.983527	0.993795	0.309429	0.340528	0.555306	0.153321	0.422861	0.688647	0.0896905	0.705028	0.889226	-0.104442	0.547077	0.639175
Acp1	-0.442385	0.158543	0.955693	-0.264747	0.347381	0.960134	-0.474509	0.091796	0.220222	-0.38144	0.229386	0.457926	-0.577287	0.0504964	0.175839	-0.212626	0.261461	0.544302	-0.0126558	0.95668	0.990533	0.256049	0.156662	0.23127
Acp2	0.226614	0.54927	0.957503	-0.312298	0.401885	0.960134	0.335007	0.307661	0.482624	-0.30741	0.39529	0.616985	-0.326727	0.320912	0.535659	0.186952	0.406903	0.677169	-0.0813281	0.760491	0.916188	-0.0271104	0.894272	0.924279
Acp6	-0.145313	0.77989	0.974201	-0.472515	0.313259	0.955127	-0.180537	0.647006	0.772119	-0.055594	0.893121	0.948286	0.346434	0.339074	0.55393	0.589387	0.0111179	0.0882353	0.0741473	0.798921	0.933415	1.62389	2.9266e-17	9.39148e-16
Acpl2	0.222056	0.61706	0.962615	-0.27836	0.582692	0.982804	-0.150677	0.746027	0.841093	-0.552077	0.150222	0.367814	-0.498919	0.1535	0.343866	-0.456769	0.0478934	0.212528	-0.301072	0.27503	0.607095	-2.44971	1.41356e-28	1.22672e-26
Acsbg1	-0.319115	0.506302	0.955693	-0.419384	0.329216	0.957925	0.536254	0.129025	0.273361	1.02473	0.0298931	0.191585	0.962727	0.0162936	0.0892824	1.08964	3.89218e-05	0.00154143	0.979418	0.00317987	0.0666703	-0.426397	0.0566873	0.0992003
Acsf2	0.189682	0.608673	0.96167	-0.0901914	0.814755	0.996172	0.407212	0.202321	0.368104	0.70222	0.040609	0.214093	0.602646	0.0687891	0.21195	0.216441	0.294069	0.579076	0.796286	0.00157228	0.0435871	-0.403043	0.0321207	0.0613286
Acsf3	0.617422	0.33715	0.955693	-0.808627	0.212954	0.924379	0.843964	0.123313	0.26523	0.507074	0.189862	0.417453	0.142541	0.694387	0.834125	0.236106	0.287172	0.57303	0.388907	0.213242	0.544844	0.674443	0.000423788	0.00140605
Acsl1	-0.0325028	0.944172	0.997186	0.136695	0.630306	0.987978	-0.226155	0.454591	0.618348	-0.247841	0.532733	0.72509	-0.39923	0.265155	0.477835	0.584426	0.0114979	0.0898532	0.204563	0.472395	0.770017	0.547547	0.00695242	0.0162266
Acsl3	-0.179332	0.507002	0.955693	-0.0971362	0.693423	0.991213	-0.560919	0.0215433	0.0897338	-1.04969	0.0585976	0.241954	0.223846	0.622469	0.787381	-0.144231	0.675404	0.852738	-0.555407	0.169259	0.495222	-0.978546	0.000761737	0.00235506
Acsl4	-0.144897	0.635297	0.962838	-0.00546401	0.99394	1	-0.720469	0.00797943	0.0485874	-0.914872	0.0389106	0.210248	-0.801127	0.07294	0.218996	-0.0205117	0.935439	0.977149	-0.385661	0.191429	0.523845	-1.25686	1.86557e-09	1.97647e-08
Acsl5	0.0191555	0.932149	0.994867	0.12861	0.589644	0.986372	-0.115594	0.647095	0.772119	-1.04854	0.00525534	0.104271	-0.933636	0.00873458	0.0589392	-0.760238	0.00139955	0.0222386	-0.842212	0.00162554	0.0440841	-1.02226	2.65021e-07	1.89735e-06
Acsl6	0.0122051	0.963412	0.998784	0.0261325	0.940937	0.997148	-0.204344	0.616256	0.750486	0.0656411	0.887186	0.945579	-0.110444	0.79532	0.894399	-0.18626	0.497041	0.745263	-0.119809	0.731925	0.90277	-0.534871	0.0225247	0.045158
Acss2	-0.00901802	1	1	-0.434545	0.489297	0.973297	-0.317493	0.531317	0.682877	-0.148413	0.722164	0.851311	0.0169657	0.96569	0.985741	-0.0191469	0.940279	0.978087	-0.0524545	0.868107	0.960514	-0.654204	0.00600651	0.0142421
Acta2	0.334978	0.353576	0.955693	0.290967	0.388496	0.960134	0.195598	0.586544	0.728507	-0.502993	0.226487	0.45553	-0.621288	0.0487415	0.172921	-0.668037	0.000600778	0.0122864	-0.292987	0.224033	0.555216	-0.714274	9.49019e-05	0.000376589
Actb	0.51013	0.238585	0.955693	0.268697	0.497597	0.97392	0.57401	0.150245	0.302497	0.652822	0.10778	0.31567	0.318803	0.397219	0.607454	-0.604301	0.0442082	0.202106	0.0338697	0.918118	0.97726	-1.60051	2.74092e-08	2.346e-07
Actg1	-0.00116077	0.991809	1	0.0483269	0.821434	0.996172	-0.547168	0.0185086	0.081301	0.0485131	0.884735	0.944497	-0.282615	0.354949	0.569699	-0.313712	0.124142	0.362686	0.0917729	0.726125	0.899431	-0.682307	0.000400283	0.00134144
Actl6a	0.0837298	0.748233	0.974136	0.194331	0.411073	0.960673	0.14084	0.55389	0.701767	-0.825933	0.0106893	0.136551	-0.883155	0.00191766	0.0206583	-0.505071	0.00802587	0.0715566	-0.878074	0.000182445	0.0131942	-0.346449	0.0450215	0.0815749
Actn1	0.161535	0.529641	0.957503	0.209068	0.368191	0.960134	-0.439304	0.06195	0.172731	0.834392	0.0131511	0.147428	0.706613	0.0247978	0.115756	0.218038	0.276569	0.561807	0.4804	0.0541869	0.284145	-0.481073	0.00818231	0.0187164
Actn4	0.0104315	0.955571	0.998784	0.106799	0.620267	0.986881	-0.082269	0.715282	0.820236	0.720062	0.0458702	0.221464	0.624224	0.0611232	0.197991	-0.0660492	0.74372	0.888476	0.289912	0.275531	0.607144	-0.790147	1.04449e-05	5.15529e-05
Actr10	-0.494338	0.213378	0.955693	-0.13543	0.697504	0.991213	-0.648213	0.0851837	0.210013	-1.32282	0.0136989	0.150401	-1.31128	0.00621802	0.047012	-0.410817	0.151705	0.408091	-0.673847	0.0616191	0.301823	0.0600053	0.813225	0.863127
Actr1a	0.287833	0.437815	0.955693	0.128103	0.687139	0.991213	1.23934	0.000292475	0.00581455	-0.375065	0.239828	0.470233	-0.747344	0.0101947	0.0654756	-0.399927	0.0317589	0.165425	-0.0947735	0.686671	0.879701	-0.579831	0.000921982	0.00278408
Actr1b	0.181092	0.602338	0.96167	-0.0763631	0.82794	0.996172	0.439493	0.173839	0.333895	0.299564	0.395188	0.616985	0.00661631	0.984435	0.994298	-0.478957	0.0164124	0.1103	-0.196305	0.472182	0.770017	-0.305114	0.0941675	0.151898
Actr2	-0.45986	0.178155	0.955693	-0.24374	0.437927	0.965949	-0.561277	0.0583072	0.165974	-0.408539	0.208827	0.437468	-1.35754	5.17105e-05	0.00167555	-0.48917	0.0220878	0.132602	-0.581038	0.0261285	0.198601	-1.08112	7.80361e-08	6.11784e-07
Actr3	-0.00786966	0.989997	1	0.20725	0.376281	0.960134	-0.373947	0.124123	0.266596	-0.497695	0.157508	0.376782	-0.457346	0.172249	0.366456	-0.246266	0.333557	0.617767	-0.438329	0.200506	0.533883	0.256589	0.147129	0.219944
Actr5	0.435939	0.451546	0.955693	0.197713	0.70423	0.992764	1.09514	0.0359899	0.122128	0.43289	0.257637	0.487066	1.23252	0.000606985	0.00940638	-0.304031	0.182755	0.452355	-0.11315	0.698527	0.885582	-0.0715886	0.708186	0.779583
Actr6	-0.920205	0.0720091	0.955693	-0.541487	0.249378	0.93973	-0.41374	0.332536	0.507525	-2.28601	0.0074117	0.120667	-1.59691	0.0146853	0.083694	-0.721801	0.0971606	0.317818	-1.38855	0.00981236	0.125492	-0.315426	0.172597	0.250293
Actr8	-0.288102	0.383051	0.955693	-0.0644156	0.839804	0.996172	-0.085156	0.768398	0.85443	-0.102648	0.765599	0.877432	-0.348206	0.288509	0.502469	-0.0734473	0.720774	0.875768	-0.179053	0.481627	0.775515	0.434814	0.0160151	0.0336131
Acvr1	-0.100719	0.773949	0.974201	-0.0719641	0.819917	0.996172	-0.0285054	0.92286	0.954419	0.344151	0.311254	0.541263	0.197203	0.534221	0.721256	0.745857	0.000236526	0.006278	0.315003	0.208201	0.542122	0.659694	0.000522429	0.00168844
Acvr1b	0.831621	0.210223	0.955693	0.170497	0.753906	0.9929	1.05705	0.054511	0.159537	-0.274333	0.471556	0.681057	-0.580624	0.106525	0.27627	-0.474509	0.053137	0.226046	-0.432109	0.139131	0.452141	-0.750906	0.000828199	0.00253696
Acvr2a	-0.125384	0.73945	0.974136	-0.289703	0.382752	0.960134	-0.698558	0.0285412	0.106818	-0.174516	0.699413	0.836547	-0.094688	0.820645	0.9096	0.234463	0.401867	0.673152	-0.270002	0.4276	0.735134	0.0703601	0.756239	0.818487
Acy1	0.139504	0.757761	0.974198	-0.11799	0.811184	0.996172	0.240016	0.535875	0.686794	-0.0298629	0.935504	0.970801	-0.165191	0.641388	0.800318	-0.152839	0.46777	0.724335	0.0554175	0.837575	0.948377	0.387401	0.0333441	0.0632409
Acyp1	-0.566438	0.219245	0.955693	-0.687882	0.123524	0.830956	-1.08557	0.00714578	0.0449653	0.871135	0.0731963	0.264578	0.550867	0.21795	0.42384	0.377213	0.228161	0.505991	0.343686	0.363429	0.682284	0.910904	0.00078254	0.00241191
Acyp2	-1.02004	0.0583797	0.955693	-0.81004	0.106116	0.808932	-0.778467	0.105568	0.240267	-0.966594	0.0496796	0.227238	-0.846282	0.0329246	0.137622	-0.490957	0.0764133	0.277237	-0.682309	0.0411457	0.247123	-0.00214498	1	1
Ada	0.41753	0.32344	0.955693	0.632547	0.111752	0.81513	0.820428	0.0217588	0.0902171	0.0893949	0.817066	0.905449	-0.576496	0.110798	0.282733	-0.376785	0.107082	0.335905	0.037176	0.894767	0.969364	-0.639718	0.00145656	0.00417356
Adal	-0.368571	0.511046	0.955693	0.130076	0.813324	0.996172	-0.354865	0.408127	0.578402	-0.597017	0.369244	0.594651	-0.141479	0.779209	0.884598	0.508362	0.0793803	0.283575	0.236451	0.487205	0.780466	0.664834	0.0067728	0.0158593
Adam10	-0.274759	0.358631	0.955693	-0.0302008	0.916625	0.996527	-0.313868	0.229784	0.399481	-0.229855	0.53875	0.729544	-0.0849967	0.810592	0.903776	-0.0374075	0.882226	0.954103	-0.181695	0.535258	0.803048	-0.811944	0.000942183	0.00283992
Adam12	0.2334	0.400881	0.955693	0.178147	0.470004	0.967931	-0.476071	0.0719243	0.190291	-0.462652	0.14124	0.356361	-0.514318	0.0760178	0.225054	-0.928328	1.74419e-06	0.000122585	-0.732755	0.00178939	0.0471628	-2.84087	2.12268e-48	7.84606e-46
Adam17	-0.123692	0.661961	0.967608	-0.0154791	0.959989	0.998816	0.309668	0.179595	0.340556	0.0204131	0.949175	0.977582	0.407442	0.176393	0.37202	-0.0890845	0.644091	0.833844	-0.141282	0.558534	0.818005	-0.636276	0.000410771	0.00136832
Adam19	0.228316	0.550637	0.957503	0.0937825	0.783726	0.996172	0.209732	0.583465	0.726239	-0.132367	0.68525	0.82663	-0.745502	0.013746	0.0802251	-0.385717	0.0583179	0.238726	0.0457804	0.850673	0.953044	-1.37836	1.64101e-12	2.84328e-11
Adam1a	-0.0277738	1	1	0.571464	0.272785	0.948435	-0.268144	0.629543	0.759163	0.315901	0.568321	0.751636	1.01346	0.0244969	0.114995	0.332295	0.367013	0.645653	-0.24294	0.596916	0.836734	-0.434067	0.209067	0.294494
Adam22	0.011051	0.970319	0.999359	-0.069319	0.910644	0.996527	-1.59771	0.000142539	0.00360639	0.697403	0.137323	0.351137	0.903555	0.0324778	0.136246	0.75694	0.0135914	0.0990088	0.624545	0.0821954	0.347001	0.553253	0.0466664	0.0841581
Adam23	0.225152	0.525631	0.957069	0.301858	0.35095	0.960134	0.669039	0.029194	0.10779	-0.824273	0.0235759	0.177036	-0.547965	0.106887	0.27677	-0.488295	0.0185214	0.119795	-0.598295	0.0342889	0.226325	-1.34642	2.07494e-13	4.10057e-12
Adam8	0.143895	0.939916	0.995693	0.75017	0.251787	0.93973	0.635679	0.306729	0.48139	0.148371	0.758993	0.872667	1.41991	0.00205606	0.0218525	-0.813546	0.00758003	0.0688342	0.0295597	0.949109	0.987295	-1.18133	2.06396e-05	9.46614e-05
Adam9	-0.357611	0.223775	0.955693	-0.361145	0.180845	0.892567	-0.334804	0.195605	0.360572	-0.170787	0.581959	0.761399	0.117861	0.681788	0.826761	-0.0614591	0.74433	0.888886	-0.206749	0.378451	0.695049	0.238865	0.174664	0.25274
Adamts1	-0.573101	0.0909883	0.955693	-1.43082	7.68405e-06	0.00153374	-1.45254	9.89812e-07	8.03116e-05	-0.21763	0.520676	0.71654	0.127023	0.690935	0.832392	0.0500737	0.825588	0.928066	-0.363529	0.176984	0.505791	-0.7639	0.000395928	0.00132864
Adamts12	0.0240276	0.930644	0.993882	0.0881954	0.787631	0.996172	-0.389252	0.285527	0.459654	-0.428652	0.264889	0.493484	-0.579325	0.091369	0.250608	-0.367316	0.0928468	0.310166	-0.250504	0.392724	0.704799	-2.06972	1.00884e-21	5.21672e-20
Adamts14	0.619051	0.303402	0.955693	0.00707839	0.954486	0.997985	0.0987607	0.843861	0.905076	0.917962	0.0163961	0.15734	0.346774	0.331422	0.546435	0.512503	0.0279372	0.154296	0.753919	0.00774653	0.109978	-0.464719	0.0252136	0.0497492
Adamts2	0.44265	0.307276	0.955693	0.175827	0.650444	0.990305	0.441415	0.268331	0.441977	0.482999	0.199465	0.427174	0.765886	0.0319846	0.135085	-0.240267	0.353435	0.635547	-0.16606	0.575154	0.827214	-1.05747	1.68474e-05	7.88633e-05
Adamts5	-0.0809699	0.772175	0.974201	-0.849928	0.000505928	0.0415958	-1.65791	1.22033e-11	6.40993e-09	0.475574	0.179114	0.403316	-0.0391905	0.903457	0.954229	0.113257	0.638796	0.831533	-0.262565	0.336842	0.658709	0.163022	0.469813	0.567464
Adamts6	-0.304123	0.541682	0.957503	-0.663379	0.151319	0.858332	-0.354908	0.433007	0.599446	-0.537147	0.261262	0.490297	0.6196	0.119676	0.29654	1.24129	6.70501e-06	0.000361708	-0.297506	0.431965	0.739199	-0.0501093	0.835631	0.880169
Adamts7	0.679575	0.180664	0.955693	0.92549	0.0310264	0.537575	1.70806	6.11607e-05	0.00196537	0.493572	0.197301	0.424734	0.523483	0.140292	0.326433	-0.39568	0.121813	0.359354	0.180793	0.531191	0.801606	-2.00126	3.2237e-17	1.0271e-15
Adamtsl1	-0.00556051	1	1	-0.113573	0.861683	0.996527	-1.03473	0.0221793	0.0913536	0.543884	0.240411	0.470812	0.70803	0.0894203	0.247755	0.204994	0.508708	0.75493	0.254703	0.472122	0.770017	-1.58852	8.96224e-08	6.97685e-07
Adamtsl4	0.0122454	0.973357	0.999719	0.196563	0.694937	0.991213	0.282812	0.554726	0.702292	1.14916	0.0106078	0.136551	1.75899	2.01776e-05	0.000832118	0.201119	0.441801	0.703365	0.81072	0.0130213	0.14218	-0.658325	0.0055844	0.0133972
Adar	0.363824	0.304917	0.955693	0.481263	0.127444	0.835625	1.23816	5.33309e-05	0.00181035	0.0168297	0.957679	0.982304	-0.169296	0.569369	0.747426	0.528922	0.00708807	0.0655597	0.296898	0.205511	0.539027	0.0742427	0.673995	0.751057
Adarb1	0.190493	0.623673	0.962838	0.4762	0.195138	0.910963	0.00242017	0.980357	0.989278	0.277074	0.48732	0.692603	0.270497	0.463169	0.662144	-0.460107	0.0890125	0.303205	0.0139468	0.966461	0.993326	-0.868393	0.000535609	0.00172376
Adat1	0.458945	0.386827	0.955693	-0.458803	0.457305	0.967686	0.0249494	0.927912	0.956868	-0.274	0.511782	0.70988	0.129611	0.718374	0.849567	0.0751612	0.756894	0.896233	-0.22967	0.438666	0.744243	0.350721	0.0765769	0.127692
Adat2	0.0157331	0.955285	0.998784	0.136013	0.698404	0.991251	0.0266409	0.93263	0.959973	-0.533376	0.151146	0.368813	-0.485069	0.16185	0.354811	-0.218671	0.33916	0.621524	-0.505084	0.0767574	0.336978	0.904937	9.40033e-06	4.68374e-05
Adck2	0.345133	0.555245	0.957503	-0.227462	0.743125	0.9929	0.922483	0.0625309	0.173843	0.442416	0.244717	0.474563	0.250605	0.48065	0.67638	0.497146	0.0289159	0.156791	0.251374	0.371715	0.688189	0.528234	0.00815469	0.0186617
Adck5	0.079062	0.866728	0.986101	-1.11793	0.0341956	0.552195	0.771606	0.0816763	0.204961	0.378797	0.340003	0.56743	-0.267719	0.503094	0.695991	0.199626	0.410643	0.679482	-0.00636202	0.98431	0.997832	0.43383	0.0320682	0.0612517
Adcy1	0.302512	0.416034	0.955693	0.244885	0.458154	0.967931	0.0458466	0.878965	0.928163	0.132767	0.693761	0.83268	0.310482	0.329003	0.544069	-0.311709	0.160472	0.420126	-0.0604218	0.818011	0.940524	0.126535	0.52275	0.617767
Adcy6	0.539353	0.228918	0.955693	0.343783	0.406943	0.960673	0.61243	0.139677	0.287952	0.26401	0.395875	0.61751	0.171181	0.566417	0.745167	-0.184102	0.348655	0.630586	-0.0110233	0.963129	0.99216	-0.960522	1.28186e-07	9.69162e-07
Adcy7	0.731415	0.167508	0.955693	0.177903	0.720686	0.9929	0.521601	0.257448	0.429965	0.735937	0.151487	0.369397	1.63338	0.000140519	0.00328423	0.724402	0.0315011	0.164856	0.624914	0.110664	0.403124	-1.72591	1.55871e-06	9.43358e-06
Adcy9	0.739205	0.211779	0.955693	0.824129	0.124209	0.830956	0.4373	0.35801	0.531596	0.457981	0.294486	0.524098	0.644012	0.096319	0.25924	0.436772	0.112011	0.343642	0.405938	0.206959	0.54112	0.0328894	0.902293	0.930449
Add1	-0.0423585	0.879106	0.987001	-0.141468	0.534105	0.979378	-0.226355	0.321519	0.495792	0.216768	0.488209	0.693328	0.32471	0.25644	0.468645	0.187441	0.314085	0.599001	0.315573	0.177142	0.505836	-0.306702	0.0840887	0.138073
Add3	-0.034881	0.927138	0.99322	-0.290419	0.293116	0.949068	0.0632035	0.806413	0.877645	0.0668663	0.834311	0.913887	0.074731	0.801867	0.898344	0.207135	0.278287	0.563234	0.0676116	0.77216	0.921752	-0.34559	0.0566348	0.0991433
Adfp	0.140817	0.620866	0.962615	-0.0121142	0.981328	1	0.177405	0.498225	0.654766	-0.581466	0.101196	0.306134	0.465034	0.118767	0.295365	0.0932285	0.644098	0.833844	-0.112924	0.639704	0.856505	0.763456	3.59286e-05	0.00015617
Adh5	-0.83386	0.0565856	0.955693	-0.377723	0.338857	0.960134	-1.02881	0.00858063	0.0508282	-0.216339	0.51289	0.710474	0.00118747	0.997167	1	0.117522	0.567437	0.791688	-0.120272	0.626974	0.8519	0.829478	5.90435e-06	3.09158e-05
Adh7	-0.410159	0.229567	0.955693	-0.257654	0.404806	0.960134	0.15304	0.626189	0.757558	-1.35192	0.0398451	0.211743	-0.707332	0.129684	0.31247	0.413731	0.0530642	0.225965	-0.299808	0.358127	0.678842	1.70705	1.97125e-19	8.19713e-18
Adhfe1	-1.05454	0.185149	0.955693	-0.777051	0.324474	0.956677	-0.924249	0.143497	0.292597	-1.06302	0.0837787	0.282661	-0.386063	0.400331	0.609792	0.48656	0.118037	0.352486	0.00716219	1	1	1.794	3.64352e-12	5.96103e-11
Adi1	0.517057	0.133017	0.955693	0.319749	0.315277	0.955127	0.851905	0.00396345	0.031443	0.452454	0.218834	0.448061	-0.249232	0.491994	0.685673	0.0132766	0.944041	0.978825	0.185378	0.520586	0.796601	1.52001	8.44824e-14	1.75288e-12
Adipor1	-0.0820161	0.797657	0.978114	-0.359411	0.169072	0.881372	0.214457	0.421153	0.589083	-0.360729	0.281379	0.510946	-0.191202	0.536729	0.722725	-0.510017	0.0176776	0.115742	-0.310212	0.230217	0.561615	-0.164601	0.425537	0.524821
Adipor2	0.509632	0.284663	0.955693	0.214187	0.621929	0.986881	0.391063	0.357404	0.531182	-0.795194	0.0826208	0.281225	-0.0381603	0.91491	0.959398	-0.0786794	0.690487	0.86106	-0.380925	0.168113	0.493026	-0.746798	6.66498e-05	0.000273281
Adk	0.0738316	0.771327	0.974201	0.0341129	0.876344	0.996527	0.0278848	0.903389	0.942531	-1.72354	0.00980759	0.134153	-1.16014	0.0226135	0.109208	-0.953383	0.000707814	0.0138509	-1.24576	0.00185019	0.0482113	-0.87482	3.3064e-05	0.000145365
Adm	0.305865	0.406488	0.955693	1.16637	0.000425277	0.0378784	0.437749	0.180358	0.341486	0.691558	0.0515335	0.230152	0.646282	0.0653236	0.205169	-0.350718	0.145192	0.397318	-0.0791476	0.78535	0.927111	0.0602552	0.778095	0.835617
Adnp	-0.497228	0.123043	0.955693	-0.365786	0.209016	0.921776	-0.944492	0.0010944	0.0135982	-0.349507	0.303458	0.533456	-0.27646	0.410627	0.61954	0.323262	0.156892	0.415989	-0.070296	0.799722	0.934132	-0.826769	3.97623e-06	2.16255e-05
Adnp2	0.259	0.537749	0.957503	-0.181631	0.69259	0.991213	0.687643	0.0706613	0.188232	0.00350542	0.992369	0.99827	0.612269	0.0446161	0.165039	0.231268	0.265292	0.54795	0.126715	0.629304	0.853158	-0.267117	0.179888	0.258985
Ado	0.128652	0.64814	0.963151	0.258225	0.320587	0.955127	-0.129352	0.630736	0.760419	0.808194	0.0213995	0.172092	0.400883	0.192602	0.394371	-0.0540866	0.786844	0.911727	0.00818254	0.975712	0.995612	-0.877287	2.45486e-06	1.40721e-05
Adora2b	0.059883	0.870516	0.986354	-0.479527	0.219431	0.929887	-0.399216	0.287324	0.461605	0.265443	0.455646	0.669573	-0.114851	0.731172	0.857473	-0.514077	0.0373257	0.182962	-0.510175	0.0747382	0.332837	-0.676562	0.00295039	0.00768195
Adpgk	-0.434239	0.22024	0.955693	-0.282706	0.354877	0.960134	-0.826468	0.00799079	0.048621	-0.517013	0.198173	0.426152	-0.324331	0.37473	0.588391	0.0794984	0.748108	0.891276	-0.0882828	0.774669	0.922125	0.710389	0.000467195	0.00152922
Adprh	0.362053	0.429142	0.955693	-0.0997567	0.847847	0.996527	0.575814	0.146591	0.297233	0.973626	0.0138068	0.150671	0.404774	0.245244	0.457141	-0.000694914	0.997791	1	0.287058	0.362681	0.681778	0.707072	0.000873732	0.00265283
Adrbk1	0.186842	0.52125	0.95698	0.49127	0.059211	0.681713	0.0343664	0.887411	0.932959	0.555074	0.125599	0.338859	0.518429	0.119716	0.29654	-0.154104	0.495311	0.743898	0.165659	0.565511	0.821667	0.215387	0.309796	0.406276
Adrm1	-0.146887	0.624357	0.962838	0.294567	0.241004	0.93973	0.555812	0.0248311	0.0984	1.05899	0.00922315	0.130552	0.545173	0.126975	0.30795	0.06717	0.726966	0.878982	0.368152	0.207865	0.541983	0.405474	0.0373998	0.0698446
Adsl	-0.0384783	0.905282	0.991053	-0.145854	0.571162	0.981301	-0.0577268	0.822689	0.889828	0.100528	0.748022	0.865838	-0.0704206	0.809657	0.903239	0.104901	0.586834	0.801067	-0.0548511	0.816703	0.940212	0.496288	0.00451379	0.0111284
Adss	0.0375429	0.871899	0.986354	0.33202	0.135146	0.846325	-0.107831	0.647951	0.772569	-0.315871	0.338578	0.566282	-0.614332	0.0584731	0.192277	0.0294216	0.885428	0.955902	-0.287251	0.269679	0.603335	-0.233303	0.214102	0.300442
Aebp1	0.374784	0.335405	0.955693	0.00296492	0.97669	0.999988	0.581862	0.115536	0.2542	1.18005	0.00209513	0.0681088	1.22094	0.00072198	0.0105123	0.430158	0.0519623	0.222675	0.683925	0.012784	0.140704	-0.162031	0.403278	0.503228
Aebp2	0.0340607	0.902523	0.990957	0.30828	0.26205	0.94536	0.325064	0.235885	0.406745	-0.98832	0.0184847	0.164857	-0.921836	0.034331	0.141463	-0.00360435	0.987581	0.998082	-0.556096	0.0722397	0.329052	0.118913	0.626723	0.710438
Aen	0.338155	0.222874	0.955693	0.866213	0.000512653	0.0415958	0.568206	0.0261569	0.101431	0.208288	0.542926	0.732569	-0.0665186	0.827636	0.913797	-0.444567	0.025045	0.143319	-0.207034	0.431682	0.739114	0.308097	0.0806152	0.133224
Aes	0.267211	0.455151	0.955693	-0.213769	0.502051	0.974559	0.643747	0.0445617	0.140204	0.677294	0.0500179	0.22754	0.847603	0.0162046	0.0888584	-0.0299973	0.882307	0.954103	0.565796	0.0264979	0.200189	0.259519	0.201829	0.285953
Afap1	0.178511	0.574521	0.959041	0.246857	0.403674	0.960134	0.318888	0.262333	0.434898	0.537504	0.154822	0.374115	0.647527	0.0764393	0.2257	0.0392526	0.897906	0.961189	0.239831	0.461377	0.762328	0.848906	0.00382335	0.00963076
Aff1	0.259074	0.446111	0.955693	0.457978	0.143896	0.854848	1.05258	0.000440779	0.00762388	0.668122	0.0362935	0.204177	2.4337	1.70243e-14	1.41586e-11	1.81725	2.87487e-19	2.60829e-16	0.894222	0.000174952	0.0127447	1.62091	3.07393e-18	1.14469e-16
Aff3	0.421208	0.349363	0.955693	-0.338536	0.455198	0.967686	0.0941253	0.803023	0.875682	0.685157	0.0808433	0.277958	0.455249	0.198704	0.401105	0.467878	0.0649811	0.254418	0.23493	0.420884	0.729747	-0.582187	0.0102213	0.0227343
Aff4	-0.0724003	0.785895	0.976251	-0.0715845	0.762148	0.993818	-0.282748	0.219848	0.388035	-0.0815897	0.796941	0.896353	0.0922208	0.753305	0.870821	0.336595	0.0703353	0.265946	0.27109	0.267733	0.601798	-0.712883	0.000116952	0.000451345
Afg3l1	0.184912	0.639619	0.962838	-0.348614	0.376532	0.960134	0.703571	0.064007	0.176852	0.369846	0.244538	0.474486	0.162975	0.588594	0.762549	0.048937	0.805754	0.919966	0.0668796	0.785223	0.927071	-0.114239	0.504947	0.601913
Afg3l2	-0.260622	0.371013	0.955693	-0.0246311	0.93229	0.996527	0.297674	0.233148	0.403051	0.264162	0.413177	0.632634	-0.0777708	0.802872	0.899004	0.110575	0.576927	0.796896	0.212139	0.381261	0.696782	0.170528	0.332468	0.430242
Aftph	-0.557167	0.119073	0.955693	-0.913251	0.00774878	0.256069	-0.282706	0.358434	0.531921	-0.517839	0.227536	0.456147	-0.467159	0.285523	0.50009	0.411342	0.0758849	0.276197	-0.206678	0.496273	0.784416	0.0908608	0.638773	0.721068
Aga	-0.148328	0.717422	0.972971	-0.158889	0.665255	0.990689	-0.059637	0.855831	0.913008	0.086782	0.809398	0.90309	0.096317	0.778909	0.88446	0.0915031	0.683474	0.856703	0.0229179	0.9367	0.983415	0.698386	0.000232187	0.000828468
Agap1	0.434487	0.203879	0.955693	0.235398	0.431928	0.963272	0.430333	0.147046	0.297973	0.779201	0.0360476	0.203803	1.02357	0.00295549	0.0279339	0.153895	0.541328	0.774158	0.348214	0.210476	0.543952	0.865801	0.000332162	0.00114034
Agap2	-0.452182	0.381893	0.955693	-0.917066	0.0686941	0.696238	-1.2737	0.012884	0.0656816	1.39568	0.000559285	0.0357799	0.797757	0.0399399	0.154906	0.0552648	0.837821	0.933303	0.478779	0.114853	0.41187	-0.660858	0.0100615	0.0224087
Agap3	0.318278	0.470954	0.955693	0.235512	0.567157	0.980805	0.790104	0.061614	0.172436	1.01314	0.0129842	0.14663	0.548307	0.126087	0.306765	-0.182597	0.455857	0.714864	0.200795	0.532378	0.801974	-0.142656	0.533167	0.62659
Agbl3	-1.72491	0.0224629	0.955693	-1.16495	0.0908002	0.766011	-2.10304	0.00747438	0.0462744	0.272015	0.638631	0.79939	0.0698484	0.882835	0.944352	0.357459	0.324944	0.61015	0.121493	0.782649	0.925118	-0.0577945	0.917039	0.941666
Agbl5	-0.20745	0.744634	0.974136	-0.704512	0.195131	0.910963	0.204005	0.647378	0.772181	0.618056	0.113903	0.323954	0.319463	0.394071	0.604895	0.293318	0.203385	0.477192	0.429563	0.133711	0.444367	-0.0392665	0.843447	0.886157
Agfg1	0.169394	0.524859	0.957069	0.195268	0.413139	0.960673	0.15086	0.535066	0.686458	-0.513934	0.159876	0.379715	-0.356041	0.286919	0.50153	0.0653271	0.753324	0.893638	-0.0580769	0.832355	0.946117	-0.001827	0.992068	0.996038
Agfg2	0.183172	0.692402	0.971177	-0.521546	0.26558	0.946088	0.692175	0.0954967	0.226	0.789042	0.0220021	0.173582	1.08597	0.00108935	0.01401	-0.123315	0.546266	0.778264	0.493899	0.0558773	0.288262	-1.56597	3.23157e-17	1.0271e-15
Aggf1	0.223315	0.491061	0.955693	0.424458	0.150232	0.857166	0.696185	0.0133544	0.0670745	-0.200933	0.555066	0.741572	-0.172523	0.581758	0.758352	-0.41133	0.0574276	0.236536	-0.395175	0.12228	0.424619	-0.634253	0.00108924	0.00322763
Agk	0.0350667	0.926949	0.993135	-0.396577	0.352119	0.960134	0.2238	0.529749	0.681213	-0.407465	0.314163	0.544237	-0.189497	0.608192	0.776359	0.190065	0.433421	0.698007	0.110079	0.716244	0.8944	0.426772	0.0407913	0.0753046
Agl	-0.111336	0.680228	0.969312	-0.0160147	0.954238	0.997935	-0.375418	0.12869	0.27297	-0.462185	0.200095	0.427866	-0.70643	0.0218303	0.107323	-0.0146524	0.93911	0.977505	-0.289481	0.263136	0.596807	-0.786975	8.01906e-06	4.06451e-05
Agpat1	0.736826	0.268946	0.955693	0.108805	0.833238	0.996172	1.3729	0.0257428	0.100592	0.26717	0.463646	0.675206	0.136161	0.693844	0.833957	-0.50107	0.0425867	0.197531	-0.0359625	0.900233	0.971167	-0.295655	0.217784	0.305008
Agpat3	0.363355	0.305619	0.955693	0.214486	0.496101	0.973452	0.65912	0.0357275	0.121652	0.485547	0.151715	0.369837	0.775794	0.0182063	0.0958834	-0.195627	0.330049	0.614716	-0.0276569	0.911951	0.974965	-0.0704794	0.707414	0.778904
Agpat5	0.0536542	0.867732	0.986101	0.552356	0.0995127	0.786302	-0.60718	0.0811841	0.2043	-0.0587466	0.87329	0.938881	-0.171827	0.605956	0.774648	-0.755783	0.0014658	0.0228752	-0.977409	0.000488191	0.0227022	-0.0693076	0.744194	0.808298
Agpat6	0.491413	0.278327	0.955693	0.248213	0.549975	0.980133	0.702201	0.0987656	0.230353	-0.399712	0.249713	0.479996	-0.640668	0.0370272	0.148233	-0.359187	0.0530856	0.225965	-0.180902	0.435808	0.741578	0.371491	0.0329053	0.062599
Agpat9	-0.060383	0.936946	0.995061	-0.609096	0.263688	0.94536	-0.563449	0.210131	0.377237	-0.563278	0.264359	0.493344	0.14858	0.748534	0.867438	1.27163	1.66637e-06	0.000118788	0.13224	0.709064	0.891783	1.28586	2.88741e-08	2.45245e-07
Agps	-0.434279	0.171615	0.955693	-0.13363	0.643575	0.989904	-0.746092	0.0103294	0.0571436	-1.00844	0.0129476	0.14663	-1.28423	0.00618261	0.0468653	-0.4986	0.0280665	0.1546	-0.567741	0.0711888	0.326167	-1.03339	1.03644e-07	7.98126e-07
Agrn	0.277621	0.551036	0.957503	0.111976	0.777991	0.995877	0.833122	0.0532202	0.157443	0.151115	0.668725	0.814782	0.0325529	0.923375	0.963338	-0.556083	0.0113452	0.0892242	-0.149364	0.586789	0.83089	-0.983706	2.1004e-06	1.22585e-05
Agt	-0.5913	0.607163	0.96167	-2.41938	0.0118098	0.344855	-1.26652	0.117427	0.256887	0.174074	0.812704	0.904393	0.86085	0.19194	0.394016	0.355894	0.504231	0.75046	0.531476	0.388311	0.70231	-0.96005	0.0473624	0.0852284
Agtpbp1	-0.210118	0.564076	0.957503	0.092267	0.766228	0.994843	-0.493331	0.11304	0.2512	-0.988617	0.0503433	0.228168	-0.663804	0.130362	0.313125	-0.192577	0.518221	0.759944	-0.460485	0.197763	0.530459	-0.579591	0.00319308	0.00823862
Agtrap	0.670587	0.297436	0.955693	0.110305	0.829655	0.996172	1.04575	0.0827163	0.206517	0.492443	0.175976	0.400056	0.42542	0.208736	0.412303	0.389872	0.0740838	0.272825	0.417984	0.138225	0.450664	0.560587	0.00285061	0.00745676
Agxt2l2	0.365448	0.429811	0.955693	0.117199	0.787854	0.996172	-0.109882	0.784919	0.864529	-0.460788	0.288321	0.517713	-0.35718	0.34793	0.562687	0.0812142	0.74979	0.892101	-0.165231	0.593223	0.834843	0.239759	0.262505	0.355179
Ahctf1	0.0682275	0.777798	0.974201	0.277504	0.223193	0.929887	-0.125908	0.58711	0.728507	-0.381693	0.238829	0.469474	-0.834783	0.0169521	0.0917474	-0.0251211	0.90502	0.963669	-0.167668	0.513153	0.792766	-0.701914	0.000218556	0.000785166
Ahcy	0.0408039	0.870119	0.986354	0.0427631	0.848828	0.996527	0.105497	0.66721	0.78746	-0.164046	0.613365	0.782685	-0.0161401	0.95946	0.982396	-0.447749	0.0249093	0.142892	-0.351703	0.149264	0.466931	-0.259982	0.169989	0.247193
Ahcyl1	-0.220342	0.408782	0.955693	-0.0606717	0.806493	0.996172	-0.353549	0.130519	0.275397	-0.833817	0.0370156	0.205406	-0.7573	0.0590468	0.193653	-0.187351	0.319814	0.60507	-0.520964	0.0361949	0.232748	-0.642143	0.000426694	0.00141475
Ahcyl2	-0.183255	0.578915	0.96034	-0.00872807	0.984952	1	0.112669	0.683199	0.798306	-0.590912	0.166109	0.388326	0.0234909	0.958229	0.98184	-0.118168	0.57594	0.796105	-0.226305	0.420516	0.729534	-0.121276	0.517852	0.613548
Ahdc1	0.7405	0.2857	0.955693	0.029607	0.922925	0.996527	0.727568	0.226158	0.394917	1.77967	1.98499e-05	0.00582652	1.95566	3.29569e-07	3.2246e-05	0.042526	0.870559	0.948524	0.355968	0.242333	0.575555	-0.678329	0.00402619	0.010068
Ahi1	0.403145	0.507602	0.955693	0.43887	0.453924	0.967686	0.434314	0.439382	0.604989	-0.308101	0.461206	0.67348	0.105968	0.789356	0.890144	0.149963	0.56412	0.790615	-0.0617554	0.837859	0.948378	0.545687	0.00468057	0.0114885
Ahnak	-0.274373	0.612482	0.962589	0.400431	0.123121	0.830236	-0.9437	0.047624	0.146332	1.06189	0.0090582	0.129886	0.814948	0.0250778	0.116407	0.140657	0.611961	0.816931	0.577837	0.0648003	0.308103	-2.1483	2.24521e-16	6.43884e-15
Ahr	0.197112	0.703929	0.972787	0.207177	0.67628	0.99077	0.104367	0.814237	0.88327	0.744176	0.108887	0.316819	1.57013	4.6078e-05	0.00155358	1.11664	7.88291e-05	0.00269423	0.763898	0.0327083	0.222399	0.717607	0.00366335	0.00927925
Ahsa1	0.547917	0.212806	0.955693	0.839753	0.0453603	0.621543	1.52726	0.000199754	0.00454236	0.477783	0.141481	0.356361	1.33707	9.38553e-06	0.0004525	-0.491051	0.0106308	0.0856295	-0.282166	0.23922	0.571289	-0.110431	0.542527	0.63557
Ahsa2	-0.0877975	0.758801	0.974198	0.334868	0.147556	0.856128	0.388164	0.108821	0.2451	0.2331	0.51134	0.709563	1.60581	1.18676e-06	9.11069e-05	-0.0397492	0.873452	0.949765	-0.0425295	0.883229	0.964782	-0.192952	0.3974	0.497311
AI314180	-0.102811	0.693874	0.971263	0.264126	0.227945	0.931834	0.544973	0.0136198	0.0675241	-0.983524	0.0589858	0.242354	-0.849521	0.0760488	0.225079	-0.157276	0.499735	0.747281	-0.392303	0.247886	0.581547	-1.15387	9.46633e-10	1.05794e-08
AI314976	-0.718057	0.119991	0.955693	-0.445976	0.276113	0.948435	-1.04216	0.00870583	0.0511083	-0.415577	0.381811	0.605589	-0.27602	0.513097	0.7032	0.0591914	0.859618	0.943255	-0.218552	0.554926	0.815676	-0.102016	0.733059	0.799555
AI316807	-0.079274	0.853283	0.984587	-0.500673	0.194891	0.910963	-0.821055	0.0186512	0.0817801	-0.757558	0.11372	0.323823	-0.685682	0.152651	0.34289	-0.0573983	0.865561	0.94627	-0.404903	0.305562	0.635182	0.496774	0.0217159	0.0437299
AI413582	-0.186424	0.606334	0.96167	-0.738242	0.0374721	0.576365	-0.512299	0.126396	0.269826	0.381418	0.29935	0.528856	0.0159619	0.964718	0.98555	-0.159867	0.492357	0.742676	0.327605	0.284789	0.615461	-0.175346	0.453218	0.551532
AI413782	-0.679229	0.124297	0.955693	-0.26766	0.525073	0.978385	0.184139	0.613699	0.748559	-0.567798	0.222547	0.451795	0.227407	0.552002	0.733651	0.0554316	0.81457	0.922643	-0.24206	0.47019	0.769197	0.00322811	0.988428	0.993405
AI462493	-0.264502	0.499761	0.955693	-0.690826	0.0601207	0.683124	-0.380163	0.238375	0.409816	0.480625	0.209913	0.438575	0.0440924	0.902984	0.95393	-0.0442811	0.852868	0.941352	-0.260522	0.389154	0.702434	0.380464	0.0709368	0.119824
AI464131	0.0995693	0.854497	0.984587	0.139216	0.806707	0.996172	0.730124	0.22958	0.399277	0.330721	0.403072	0.622864	-0.456621	0.218677	0.424592	-0.455733	0.0680994	0.261457	-0.00681344	0.984528	0.997832	-0.709851	0.000620128	0.00196223
AI480653	-0.180744	0.632271	0.962838	-0.423983	0.221925	0.929887	-0.457014	0.152337	0.305365	0.0851398	0.794946	0.894729	-0.0802988	0.792508	0.892341	-0.251035	0.211742	0.486126	-0.246108	0.318657	0.645332	-0.437303	0.0149473	0.0316517
AI597468	-0.23715	0.450988	0.955693	-0.261151	0.362674	0.960134	-0.435874	0.109771	0.246632	0.2637	0.463572	0.675197	-0.236283	0.492261	0.685853	-0.257144	0.220415	0.494992	0.052604	0.843309	0.949785	-0.269303	0.1603	0.235334
AI597479	-0.46596	0.231037	0.955693	-1.08299	0.00466433	0.181129	-0.574265	0.0829584	0.206774	-0.755555	0.0965198	0.299434	0.405365	0.262771	0.475772	0.186337	0.426193	0.690918	-0.497939	0.108884	0.400987	-0.18346	0.384685	0.484681
AI662270	-0.880741	0.213063	0.955693	-0.964969	0.145955	0.855244	-1.96824	0.00112826	0.013816	-1.40119	0.0705638	0.261173	-0.888059	0.125576	0.306119	-0.80171	0.0935852	0.311431	-1.02364	0.0333589	0.225074	0.0943259	0.746022	0.809706
AI837181	0.656601	0.355739	0.955693	-0.0533505	0.986453	1	1.41574	0.0315834	0.113191	0.168813	0.622255	0.787881	-0.353596	0.278392	0.492092	-0.198924	0.340985	0.622886	0.178335	0.507762	0.790213	-0.0124284	0.95167	0.966346
AI846148	-0.0429717	0.964528	0.998784	-0.0651121	0.921173	0.996527	1.21237	0.00672224	0.0433665	0.491803	0.196467	0.423577	0.163475	0.66057	0.811069	-0.121282	0.633695	0.829019	0.298147	0.338648	0.65997	1.14407	2.2978e-06	1.32632e-05
AI847670	-0.410392	0.382934	0.955693	-0.485583	0.268474	0.946403	-0.571795	0.144	0.293349	-0.408909	0.337015	0.564687	-0.792088	0.0557849	0.186698	-0.111642	0.658951	0.842364	-0.672513	0.0291281	0.209669	0.485622	0.0150546	0.0318316
AI848100	-0.00119148	0.992116	1	0.230438	0.345854	0.960134	0.366616	0.119691	0.259961	-0.46735	0.245975	0.475729	-1.16862	0.0074402	0.0527367	0.0568436	0.825113	0.928066	-0.285058	0.34157	0.663109	0.654044	0.00135849	0.00392067
AI894139	-0.193688	0.772076	0.974201	-0.124231	0.876047	0.996527	1.11601	0.0154752	0.0731609	-0.632457	0.152372	0.370896	-0.20413	0.591366	0.764189	0.417415	0.10557	0.333099	-0.135248	0.665758	0.867511	0.391319	0.0773363	0.1287
AI987944	-0.50573	0.281686	0.955693	-0.314671	0.426202	0.962959	-0.114159	0.791015	0.868177	-1.14844	0.0817772	0.279786	-0.447644	0.437755	0.641836	0.825335	0.0371773	0.182593	0.351152	0.498368	0.785529	0.342403	0.346751	0.444804
Aif1l	-0.394967	0.38791	0.955693	0.0335413	0.932977	0.996527	-0.579297	0.126245	0.269619	0.264358	0.489211	0.694167	-0.0469731	0.893618	0.949111	-0.823991	0.000454121	0.0103003	-0.34713	0.225681	0.556674	-1.12262	1.04691e-07	8.04943e-07
Aifm1	-0.200465	0.470721	0.955693	-0.105241	0.668073	0.990767	-0.450689	0.0619616	0.172731	-0.44553	0.206708	0.435231	-0.244758	0.454504	0.655208	-0.328758	0.167758	0.430946	-0.472737	0.0954454	0.375461	-0.473894	0.0315397	0.0604506
Aifm2	0.375241	0.488978	0.955693	0.578671	0.25591	0.93973	0.767231	0.111611	0.249323	0.755643	0.0698389	0.260169	0.583533	0.134614	0.318352	0.293737	0.27572	0.56054	0.243529	0.450388	0.753668	0.255351	0.244396	0.335384
Aig1	0.257713	0.62742	0.962838	0.0104888	0.978823	1	0.134666	0.782755	0.86315	-0.166944	0.754724	0.87097	0.0765153	0.889977	0.947309	0.237824	0.41832	0.685641	-0.0463156	0.927303	0.981076	2.13289	1.14002e-17	3.85676e-16
Aim1	-0.15221	0.782231	0.975503	0.109905	0.827609	0.996172	-0.621238	0.223117	0.391405	-0.392127	0.394954	0.616845	-0.731472	0.0670125	0.208373	0.244009	0.354978	0.637058	-0.0744856	0.821262	0.941334	-1.47672	6.33025e-09	6.07461e-08
Aim2	0.509992	0.332401	0.955693	0.594931	0.137549	0.847332	-0.781474	0.045549	0.142234	-0.826587	0.207158	0.435708	-0.45984	0.335261	0.550222	0.334415	0.381798	0.657782	-0.0358845	0.946108	0.986529	-0.0933618	0.741648	0.806543
Aimp1	-0.330065	0.322698	0.955693	-0.101234	0.732928	0.9929	-0.652161	0.0301498	0.109698	-0.864017	0.108337	0.316305	-1.11587	0.00768547	0.0538828	-0.126274	0.563505	0.790615	-0.492791	0.0552989	0.286876	0.883909	9.12571e-06	4.56514e-05
Aimp2	0.0769546	0.804998	0.979835	0.163466	0.571848	0.981301	-0.127019	0.678025	0.795707	-0.635873	0.0542022	0.233624	-0.565085	0.0603906	0.196319	-0.509143	0.0192812	0.122339	-0.444126	0.0654872	0.310186	0.0515037	0.780322	0.837558
Aip	0.684213	0.0997041	0.955693	0.206938	0.564164	0.980133	1.19377	0.000755678	0.0106745	0.352748	0.311805	0.54175	0.133133	0.676125	0.822994	-0.24246	0.205405	0.478958	0.258139	0.354265	0.674947	0.51708	0.00878335	0.0198771
Airn	0.121688	0.808526	0.979881	0.39892	0.383813	0.960134	-0.796231	0.054745	0.15994	-0.686179	0.255967	0.48523	-0.878159	0.0900679	0.248652	0.077269	0.803308	0.919161	-0.0347623	0.926899	0.980856	-0.161086	0.533355	0.626664
Ak1	0.32002	0.363304	0.955693	0.82231	0.0076889	0.255784	1.79561	2.0263e-09	5.46554e-07	0.802649	0.0158179	0.156256	0.885389	0.00532372	0.042369	0.0227492	0.915048	0.967965	0.579583	0.0169426	0.159066	-0.718349	5.88707e-05	0.000243942
Ak2	0.238698	0.450272	0.955693	0.503186	0.0688211	0.696238	0.100655	0.710099	0.816451	0.268959	0.419559	0.638281	0.036495	0.912891	0.958209	-0.183855	0.374116	0.652476	0.09823	0.720073	0.895751	0.0432665	0.819867	0.867225
AK220484	0.119284	0.818801	0.981006	-0.742269	0.157454	0.862767	-0.844413	0.0736292	0.192845	0.456493	0.304637	0.534789	0.544622	0.151626	0.340971	-0.0262834	0.926303	0.97269	0.259981	0.434193	0.740465	-1.22889	7.58802e-07	4.92703e-06
Ak3	-0.58786	0.105806	0.955693	-0.400373	0.215125	0.925107	-0.958026	0.0021112	0.0209649	-0.553425	0.140315	0.355508	-0.676815	0.10853	0.278869	-0.382229	0.174402	0.440344	-0.617342	0.0573925	0.292285	-0.591044	0.00127551	0.00371104
Ak3l1	-0.10886	0.754918	0.974198	0.120215	0.685314	0.991213	-1.77454	8.96383e-08	1.18141e-05	-0.78609	0.0808788	0.277958	-0.811081	0.0552683	0.185591	-1.00725	0.000124408	0.00383206	-0.992936	0.00439502	0.0804813	-0.666877	0.00255052	0.00681504
Ak5	0.103164	0.728051	0.973017	-0.0258514	0.941435	0.997148	-1.26171	2.13504e-05	0.000936805	0.280496	0.409014	0.628632	0.153308	0.633123	0.795233	0.229273	0.288848	0.57516	-0.0151747	0.954811	0.989774	0.973083	4.2581e-07	2.92671e-06
Akap1	0.142422	0.671948	0.967922	0.113743	0.702622	0.992522	-0.132065	0.697914	0.808401	-0.193018	0.550213	0.738089	-0.642155	0.0357359	0.144919	-0.09908	0.635116	0.829824	-0.152997	0.543733	0.809386	-0.154522	0.438726	0.53803
Akap10	-0.0242006	0.964313	0.998784	-0.148671	0.652667	0.990305	0.0841929	0.76222	0.851462	-0.0855509	0.8183	0.905894	-0.221573	0.51498	0.705201	0.0156226	0.94877	0.981215	-0.149319	0.584847	0.830393	-0.115077	0.54343	0.636311
Akap12	0.0958613	0.696626	0.971446	0.159087	0.477692	0.970314	-0.119672	0.620208	0.753304	0.75458	0.0209231	0.171721	1.34039	1.74349e-05	0.000740427	0.260134	0.229859	0.508083	0.367461	0.122748	0.42565	0.142882	0.439387	0.538774
Akap13	0.387109	0.225427	0.955693	0.173828	0.555205	0.980133	0.239125	0.407475	0.577985	0.446037	0.191086	0.417569	0.936342	0.00392142	0.0342396	-0.165901	0.500242	0.747815	0.29098	0.302108	0.631435	-1.79639	2.26978e-13	4.47676e-12
Akap2	-0.0361481	0.898805	0.989627	0.192498	0.37813	0.960134	-0.498298	0.0250697	0.0988134	0.288444	0.372586	0.597799	1.28181	6.17641e-05	0.00188063	0.154604	0.432087	0.696645	0.421508	0.0768902	0.336978	-1.95412	7.87175e-23	4.48915e-21
Akap7	-0.188729	0.639682	0.962838	-0.175274	0.63893	0.989904	-0.925237	0.0143352	0.0697881	-0.274996	0.578807	0.759879	-0.480793	0.265972	0.478444	0.398489	0.196523	0.470561	0.052284	0.893288	0.968707	0.378649	0.137383	0.207646
Akap8	0.143215	0.617899	0.962615	0.354308	0.173578	0.885162	-0.139866	0.599594	0.738759	0.558693	0.0985016	0.30229	-0.0462246	0.878043	0.941536	0.0885839	0.655386	0.839958	0.268116	0.299447	0.628437	-0.0467887	0.790164	0.845213
Akap8l	0.223479	0.512472	0.955693	0.0550365	0.843431	0.9965	1.36764	9.55645e-07	8.03049e-05	0.430103	0.194678	0.421543	0.732551	0.0170848	0.0921657	0.723641	0.000299149	0.00746377	0.313634	0.209811	0.543952	0.921806	1.93695e-07	1.42347e-06
Akap9	-0.297966	0.319859	0.955693	0.059027	0.814143	0.996172	-0.275231	0.346636	0.521155	0.321661	0.375103	0.599827	0.485761	0.153388	0.343849	0.80679	0.000795562	0.0150659	0.5495	0.0592769	0.296943	0.351527	0.113777	0.177699
Akirin1	-0.230924	0.427268	0.955693	-0.119495	0.644518	0.989904	-0.201855	0.424095	0.591623	0.236972	0.49202	0.696406	-0.355219	0.273562	0.486571	-0.0816164	0.720195	0.875559	-0.464436	0.0739016	0.331475	0.129703	0.483652	0.580987
Akirin2	-0.226717	0.473246	0.955693	-0.533245	0.0587018	0.679634	-0.540531	0.063087	0.175037	0.159733	0.710972	0.843959	-1.25086	0.00141656	0.0171153	-0.24391	0.390622	0.664691	-0.928149	0.00878317	0.118322	0.791558	0.00502701	0.0122275
Akna	0.500253	0.220655	0.955693	-0.103333	0.825346	0.996172	0.565774	0.120076	0.260577	0.921369	0.0261755	0.182887	1.44544	0.000175849	0.00388268	1.35151	4.48994e-07	3.73413e-05	0.730192	0.0165554	0.157505	1.2376	6.35437e-07	4.19978e-06
Akr1a4	0.324593	0.252131	0.955693	0.322736	0.202385	0.917386	0.64867	0.0113679	0.060832	-0.29329	0.359887	0.587067	0.0854601	0.770451	0.880566	-0.238129	0.212257	0.486635	-0.181947	0.441942	0.746291	0.417464	0.0210706	0.042654
Akr1b10	-0.647341	0.233751	0.955693	-0.136883	0.787714	0.996172	0.608402	0.17612	0.33659	-0.331076	0.507003	0.707299	0.4253	0.288979	0.502791	0.692567	0.00849456	0.0741047	-0.00540605	1	1	0.83697	0.000209118	0.000755883
Akr1b3	-3.11038	0.00103153	0.955693	-1.63237	0.0432135	0.607423	-2.68491	0.00139238	0.0158629	0.398752	0.447109	0.662997	0.909711	0.0631675	0.201556	0.108681	0.750939	0.892671	-0.286313	0.564407	0.820985	0.459887	0.164078	0.239891
Akr1b8	0.157239	0.547817	0.957503	0.364809	0.127364	0.835625	0.376523	0.138201	0.285969	-0.492806	0.242183	0.471975	-0.299463	0.361538	0.575554	-0.0783479	0.722951	0.876783	0.112253	0.676981	0.873581	-0.384216	0.0600259	0.103931
Akr1c14	-0.641737	0.139049	0.955693	-0.784256	0.0562927	0.670959	-1.87329	4.1843e-06	0.000263297	-1.08017	0.185669	0.412414	-0.699213	0.286112	0.500772	0.0778968	0.80762	0.920521	-1.01421	0.0426932	0.252117	-0.519228	0.0642366	0.11
Akr1c18	-0.562207	0.315184	0.955693	-0.490474	0.324972	0.956677	-1.03514	0.0438569	0.13895	-1.01225	0.196066	0.423262	-0.1798	0.795241	0.894399	-0.295316	0.496483	0.744761	-0.906694	0.0989309	0.383132	-0.0292084	1	1
Akr1e1	0.071152	0.862979	0.986037	-0.562168	0.256007	0.93973	-0.489832	0.251929	0.423955	-1.12696	0.0868813	0.287679	-0.543421	0.259527	0.472126	-0.151384	0.604571	0.812718	-0.556675	0.163071	0.486822	0.179385	0.4806	0.578436
Akr7a5	0.514648	0.332581	0.955693	-0.183594	0.736803	0.9929	0.902823	0.0520073	0.155399	0.846236	0.0291553	0.190248	0.653539	0.0662177	0.206862	0.104352	0.617051	0.81956	0.114098	0.687706	0.880215	0.842836	1.72921e-05	8.05008e-05
Akt1	0.262938	0.384822	0.955693	0.161249	0.536919	0.979378	0.457663	0.10969	0.246612	0.335091	0.327485	0.555892	0.120436	0.716086	0.848657	-0.383023	0.0515763	0.221581	-0.0960039	0.701169	0.887246	-0.553997	0.00183881	0.00513181
Akt1s1	0.449532	0.411022	0.955693	-0.120861	0.844377	0.996527	1.53749	0.00300808	0.0262189	0.994181	0.0127481	0.145732	0.631124	0.0498037	0.174645	0.0392172	0.847503	0.938639	0.0870153	0.758861	0.915616	0.927595	1.4348e-05	6.83174e-05
Akt2	0.432587	0.338843	0.955693	0.169757	0.666978	0.990689	0.813845	0.0423843	0.135626	0.120955	0.696532	0.834902	0.307642	0.287493	0.501956	-0.0252433	0.892285	0.958455	0.316043	0.176819	0.505485	-0.159914	0.355552	0.454167
Akt3	-0.610201	0.120986	0.955693	-0.351638	0.334265	0.959848	-1.20092	0.00101967	0.0129305	-0.597749	0.246368	0.476226	-0.386513	0.409468	0.618602	0.0487923	0.827016	0.928939	0.104541	0.751998	0.912455	-0.674199	0.000264352	0.000929202
Aktip	-0.113479	0.766089	0.974201	-0.00336715	0.994636	1	-0.133189	0.674506	0.793069	-1.07897	0.0564546	0.237428	-0.36375	0.432534	0.638563	-0.40521	0.243159	0.524394	-0.425971	0.326631	0.652347	-0.0351909	0.870698	0.907621
Alad	0.0667433	0.809754	0.979881	0.366358	0.133467	0.845712	0.102978	0.679695	0.796739	0.408158	0.243008	0.472753	-0.0636229	0.840529	0.91996	-0.164539	0.417552	0.685214	0.0812772	0.767374	0.919054	0.757027	0.000152634	0.000571589
Alcam	-0.0345066	0.918057	0.992307	0.0769832	0.753864	0.9929	-0.559267	0.032435	0.114875	-0.976852	0.0115632	0.14177	-0.920105	0.027336	0.122944	-0.693731	0.0144011	0.102549	-0.97444	0.0014736	0.0424012	-1.09069	5.68713e-08	4.57723e-07
Aldh18a1	0.400065	0.224621	0.955693	0.0829907	0.758159	0.993133	-0.0728326	0.809164	0.879583	-0.20951	0.528835	0.722177	0.247422	0.393418	0.604352	0.53909	0.00510786	0.0528196	0.0343428	0.883288	0.964782	1.48662	9.28775e-17	2.7752e-15
Aldh1a1	0.00349573	1	1	0.0845664	0.821398	0.996172	-0.505571	0.151965	0.305011	-2.31396	0.000505953	0.0345875	-1.80271	0.000732277	0.0106223	-1.20828	5.30132e-05	0.0019965	-1.19054	0.00129053	0.0391475	-0.929528	0.000190198	0.000695148
Aldh1a7	-0.945465	0.0990531	0.955693	0.172936	0.705278	0.992764	-1.20965	0.00658142	0.042986	-1.78146	0.013814	0.150671	-1.84981	0.000377312	0.00665295	-0.945172	0.00704652	0.0654645	-1.20321	0.0087912	0.118322	-0.744707	0.0104023	0.0230803
Aldh1l2	0.0427979	0.85932	0.985975	0.0257362	0.8999	0.996527	-0.0988739	0.668319	0.788395	-0.279832	0.418784	0.637795	0.409944	0.178838	0.375506	0.540901	0.00452461	0.0488169	0.0512592	0.839096	0.94875	1.19603	4.03458e-11	5.58025e-10
Aldh2	-0.0860146	0.810493	0.979976	0.276839	0.319598	0.955127	0.807019	0.00398254	0.0314863	0.790429	0.0222103	0.174397	0.682251	0.0392555	0.153155	0.328468	0.0881785	0.301687	0.262989	0.299055	0.628417	0.223272	0.202023	0.286187
Aldh3a2	-0.157809	0.661369	0.967243	-0.386041	0.240124	0.93973	0.250502	0.407428	0.577985	-0.55336	0.142111	0.356361	-0.226054	0.527876	0.715602	0.306652	0.133463	0.378937	-0.0766966	0.786462	0.927417	0.415885	0.0300937	0.0579909
Aldh5a1	-0.105608	0.896418	0.98914	0.144171	0.78218	0.996172	0.691588	0.108194	0.244072	0.0684955	0.874024	0.939229	-0.166417	0.651315	0.805636	0.188259	0.458839	0.717068	0.0109562	0.980655	0.996299	0.354858	0.0920799	0.148964
Aldh6a1	-0.460099	0.355388	0.955693	-0.628295	0.202933	0.917386	-0.632416	0.137942	0.285738	-0.113474	0.795148	0.894762	0.123207	0.74565	0.865401	0.183697	0.471793	0.727742	-0.145568	0.66663	0.868067	0.96433	5.5261e-06	2.91339e-05
Aldh7a1	0.211248	0.510224	0.955693	0.19316	0.504246	0.974559	0.817928	0.00251152	0.0232058	0.244861	0.449591	0.664236	0.184201	0.541107	0.725819	-0.0208888	0.918659	0.969361	-0.0760224	0.760153	0.916188	0.294664	0.0866225	0.141581
Aldh9a1	-0.48707	0.168528	0.955693	-0.32992	0.312874	0.955127	-0.281997	0.364877	0.53852	0.0386574	0.90173	0.953211	0.0176055	0.952511	0.9794	-0.0937343	0.633127	0.828856	-0.161128	0.500704	0.786321	0.205958	0.243863	0.334858
Aldoa	0.536535	0.197817	0.955693	0.0529838	0.866453	0.996527	1.12256	0.00275869	0.0248257	0.668951	0.055831	0.236299	0.19022	0.554732	0.735799	-0.257614	0.179715	0.448076	0.481165	0.0959496	0.376406	0.137219	0.462056	0.559898
Alg1	-0.0867343	0.922596	0.992307	-1.37267	0.0418056	0.604667	0.960182	0.109297	0.246006	-0.0744101	0.835607	0.914663	0.138909	0.679977	0.825971	0.387182	0.0706515	0.266521	0.00891851	0.975039	0.995589	0.938712	5.28312e-07	3.57097e-06
Alg10b	0.180385	0.588256	0.96034	-0.17194	0.594155	0.986681	0.30748	0.302822	0.477889	-0.0304245	0.927022	0.966233	0.423352	0.16447	0.358227	-0.0371603	0.866457	0.946813	0.121144	0.636153	0.855635	-0.282474	0.154897	0.229461
Alg11	0.282321	0.510354	0.955693	0.442211	0.283071	0.948861	0.608996	0.0986812	0.23021	-1.60479	0.00872716	0.128651	-0.963572	0.0629811	0.201265	-0.544479	0.0754384	0.275066	-0.842513	0.0447938	0.260804	-0.460518	0.071275	0.120286
Alg12	-0.123536	0.832175	0.981006	0.281826	0.55865	0.980133	0.309086	0.480025	0.639606	-1.85965	0.000973047	0.0469829	-0.884813	0.103696	0.27141	-0.33328	0.464055	0.721606	-0.805444	0.109065	0.401024	1.21063	0.00641274	0.0150906
Alg13	0.191752	0.726867	0.973017	0.631597	0.260967	0.945037	-0.319024	0.589645	0.73056	-1.90165	0.00310053	0.0821663	-1.2013	0.0728993	0.218939	-0.614939	0.0595546	0.241863	-1.03601	0.00598839	0.0950146	-0.429843	0.101701	0.161698
Alg14	-1.20972	0.0259137	0.955693	-0.994678	0.0508013	0.650099	-1.16785	0.0150947	0.0719758	-1.83973	0.0229479	0.175916	-1.27724	0.059107	0.193787	-0.882948	0.00225822	0.0306463	-0.977909	0.0448491	0.260835	-0.138083	0.515099	0.611187
Alg2	-0.232251	0.52393	0.95698	-0.451242	0.172699	0.884215	-0.62128	0.04858	0.148356	-0.132189	0.708436	0.842641	-0.0761187	0.815308	0.90642	0.158234	0.450687	0.710539	-0.340211	0.192579	0.524463	1.49835	5.5642e-16	1.52557e-14
Alg3	0.0785606	0.841745	0.98262	-0.188258	0.67556	0.99077	0.0312036	0.931258	0.959129	-0.536088	0.167685	0.389821	-0.337828	0.305456	0.520219	-0.0793739	0.713483	0.872672	-0.0826446	0.749473	0.912182	1.04032	5.38474e-08	4.3762e-07
Alg5	0.26514	0.469661	0.955693	-0.0129603	0.99627	1	0.266472	0.399417	0.570546	-0.85916	0.0561373	0.236722	-0.685035	0.0925491	0.252637	0.122002	0.608741	0.815093	-0.487281	0.126754	0.433369	1.01618	1.48336e-07	1.10891e-06
Alg6	-0.563996	0.187026	0.955693	-0.643851	0.0797664	0.733028	-1.07318	0.0118739	0.0625514	-1.121	0.064496	0.251261	-1.97803	0.000291789	0.00562173	-0.0288869	0.927663	0.973509	-0.854683	0.0141184	0.148318	-0.12095	0.625137	0.709284
Alg8	0.325859	0.586286	0.96034	-0.332229	0.653219	0.990305	-0.0101586	0.992656	0.997928	-1.27214	0.0215295	0.17272	-0.244504	0.649609	0.804719	-0.343288	0.304121	0.588658	-0.48667	0.172879	0.500355	0.263942	0.239091	0.329439
Alg9	0.208076	0.566931	0.958003	-0.0248731	0.954158	0.997935	0.192734	0.529029	0.680902	-1.36408	0.0181617	0.163586	-1.38779	0.00431478	0.0365858	-0.394439	0.0659373	0.256795	-0.622357	0.0546887	0.285479	0.0169666	0.927511	0.949488
Alkbh1	0.29587	0.448022	0.955693	0.295176	0.407441	0.960673	-0.163911	0.648168	0.772569	-0.62438	0.230724	0.459515	-0.456128	0.30522	0.520219	0.396226	0.0808367	0.286794	0.0100376	0.975757	0.995612	0.368541	0.0529286	0.0937737
Alkbh2	0.487286	0.351108	0.955693	0.237727	0.634037	0.989429	0.0281465	0.935964	0.961835	0.269466	0.556423	0.742263	0.0999832	0.801715	0.898344	0.333722	0.219584	0.494385	-0.041027	0.914619	0.975515	1.25446	4.24986e-07	2.92306e-06
Alkbh3	-0.0283198	0.946788	0.997461	-0.0900752	0.780112	0.995877	-0.1138	0.705098	0.81276	-0.147502	0.682651	0.824607	-0.731403	0.025324	0.117169	0.240275	0.238405	0.51904	0.307286	0.259279	0.592975	0.957192	1.66337e-07	1.23149e-06
Alkbh4	-0.217835	0.732364	0.973401	0.0446607	0.916032	0.996527	0.736898	0.0699618	0.18729	0.443247	0.298518	0.528323	0.196802	0.618233	0.784837	-0.372416	0.153047	0.409824	0.047256	0.881844	0.964073	-0.192562	0.393036	0.49259
Alkbh5	0.190948	0.506924	0.955693	0.281139	0.261384	0.945037	0.520876	0.039174	0.128916	0.715373	0.0262493	0.182887	0.634601	0.0285252	0.12586	0.0190134	0.918573	0.969361	0.256571	0.272232	0.605364	-0.102183	0.557214	0.648286
Alkbh6	0.425719	0.42509	0.955693	-0.203028	0.722793	0.9929	0.666169	0.128402	0.27259	0.510626	0.249274	0.479522	0.582596	0.150768	0.339737	0.172868	0.541398	0.774158	-0.0371585	0.914281	0.975472	1.51203	1.23661e-08	1.12604e-07
Alkbh7	0.214218	0.666722	0.967813	-0.934686	0.07661	0.724023	0.196081	0.652879	0.776036	0.809032	0.0628194	0.249478	0.0539466	0.890236	0.94742	0.0653587	0.788015	0.912554	-0.184584	0.585468	0.830393	0.674963	0.000895482	0.00271391
Alkbh8	-0.162803	0.636102	0.962838	-0.331653	0.278471	0.948861	-0.0517317	0.873068	0.923597	-1.52382	0.0384272	0.209238	-0.865223	0.14684	0.334886	-0.240258	0.448591	0.709274	-0.847126	0.0667569	0.313374	-1.32573	2.51471e-07	1.80423e-06
Alms1	0.0340937	0.886154	0.987724	0.358901	0.11804	0.822555	0.263909	0.255836	0.428397	-0.0264427	0.941916	0.974127	0.0297976	0.92788	0.966037	0.109492	0.641775	0.833249	0.181407	0.491985	0.782596	-1.36461	2.7289e-11	3.86304e-10
Alox8	0.0100877	0.978408	1	-0.14455	0.803039	0.996172	-0.71788	0.151147	0.303815	-0.898913	0.275494	0.504853	-2.23297	4.36003e-05	0.00150195	-0.886766	0.0375522	0.183632	-0.461783	0.50336	0.787918	-0.387635	0.242387	0.333199
Alpk1	-0.0342171	1	1	-0.235499	0.763342	0.994278	0.307027	0.558022	0.704498	-0.344487	0.486416	0.692403	-0.159062	0.689288	0.831387	0.895871	0.00021727	0.00588734	0.450187	0.165022	0.48915	-0.341507	0.106425	0.168084
Als2	0.0988891	0.764052	0.974201	0.402909	0.183075	0.893789	1.18066	6.16864e-05	0.00197318	-0.101149	0.777007	0.883871	0.496805	0.184601	0.383497	-0.214303	0.334656	0.618379	-0.112504	0.668089	0.868394	-1.00163	2.69957e-07	1.92992e-06
Als2cl	-0.401918	0.612161	0.962589	-0.129735	0.836504	0.996172	-1.03252	0.0900779	0.217881	-1.20065	0.0590393	0.242377	-0.280249	0.630383	0.793544	0.643275	0.0912696	0.307543	-0.372505	0.467077	0.7658	3.21361	5.24519e-29	4.71595e-27
Als2cr4	-0.523047	0.137744	0.955693	-0.335432	0.296206	0.94961	-0.964418	0.00703108	0.0445806	-0.206073	0.63524	0.796975	-0.180059	0.642097	0.800515	0.197191	0.476939	0.731946	0.065483	0.83511	0.947382	0.50584	0.0380048	0.0707626
Amacr	-0.318102	0.475162	0.955693	-0.948539	0.0338395	0.550927	-0.370281	0.30979	0.484137	0.215133	0.571095	0.753408	0.209349	0.543105	0.727151	0.448865	0.0469074	0.209738	0.0422111	0.881577	0.964073	1.00471	1.33416e-07	1.0029e-06
Ambra1	0.419925	0.236438	0.955693	0.0754295	0.805861	0.996172	0.822328	0.0089179	0.0520167	0.342453	0.287529	0.51689	0.411807	0.180765	0.378126	0.0628867	0.752259	0.893117	0.221295	0.361984	0.681219	-0.26749	0.150075	0.223405
Amfr	0.090885	0.731388	0.973401	0.019454	0.9251	0.996527	0.283241	0.290669	0.465107	-0.163453	0.600435	0.774604	-0.298935	0.306182	0.521183	-0.0391642	0.833067	0.931576	-0.228228	0.328677	0.654077	0.133039	0.462528	0.560322
Amigo2	-0.772422	0.0782675	0.955693	-1.96006	3.90625e-05	0.00549076	-1.37951	0.000385312	0.00699167	-0.82573	0.0837691	0.282661	-0.804296	0.0482074	0.172044	-0.423308	0.0789365	0.282664	-0.393408	0.221505	0.553625	-2.30039	3.25109e-23	1.9313e-21
Ammecr1	-0.0460096	0.914335	0.991531	0.0653776	0.821029	0.996172	-0.377815	0.216894	0.384959	0.421878	0.295805	0.525572	0.22837	0.519914	0.709594	-0.0444136	0.851562	0.940734	0.224895	0.440024	0.745179	-1.101	6.60796e-07	4.34006e-06
Ammecr1l	0.30996	0.376165	0.955693	0.337866	0.295942	0.949068	0.740437	0.0164968	0.0760805	-0.442314	0.264964	0.493531	-0.561853	0.145605	0.333211	-0.132668	0.545158	0.777017	-0.377341	0.212254	0.544079	-0.62778	0.00114461	0.00337362
Amn1	-0.84238	0.140962	0.955693	-0.936993	0.0903776	0.763733	-0.898787	0.0910102	0.219022	-0.208813	0.715495	0.847181	-0.10825	0.815571	0.906543	0.701111	0.0329206	0.169968	-0.0202249	1	1	1.73495	3.8388e-09	3.8388e-08
Amot	-0.0976503	0.73893	0.974136	-0.0775512	0.773152	0.995049	-0.634769	0.0120478	0.0632162	-0.0253218	0.948038	0.977419	0.483447	0.203953	0.406651	-0.291479	0.336654	0.619752	-0.167438	0.615167	0.846495	-0.901977	0.0027864	0.00732568
Amotl1	-0.0404271	0.897225	0.98914	-0.00202274	0.99766	1	0.170483	0.469506	0.631236	0.695903	0.039877	0.2118	0.825331	0.00715885	0.0513927	0.420446	0.0444457	0.20282	0.548555	0.0289226	0.208862	-0.0436397	0.815973	0.864848
Amotl2	-0.241497	0.394434	0.955693	-1.73851	4.97334e-11	4.02877e-08	-0.748814	0.00441224	0.0336228	2.11959	2.32737e-07	0.000211156	1.99211	2.48328e-07	2.55497e-05	0.845509	4.84428e-05	0.00187387	0.510728	0.0709077	0.325211	0.966504	1.03284e-07	7.96578e-07
Ampd2	0.137555	0.662123	0.967636	0.376636	0.186301	0.896345	0.732062	0.0100063	0.055977	0.244426	0.482306	0.689353	0.0314483	0.923018	0.963338	-0.0705647	0.746879	0.890331	0.138183	0.616677	0.846552	0.714699	0.000483793	0.00157838
Ampd3	-0.152399	0.659453	0.966565	0.671916	0.0143477	0.380212	1.07155	3.33345e-05	0.00133071	0.17913	0.599201	0.773713	0.613125	0.0470813	0.169997	0.0239385	0.906244	0.964007	0.438048	0.0772421	0.337321	1.19204	2.97089e-11	4.18187e-10
Amz2	0.454156	0.425027	0.955693	0.392811	0.474203	0.969738	0.74981	0.147743	0.298961	-1.27682	0.0179125	0.162663	-0.77429	0.107707	0.277679	-0.578298	0.0390907	0.187647	-0.573658	0.140888	0.454302	-0.463745	0.0186008	0.0382675
Anapc1	0.113445	0.637652	0.962838	0.140602	0.513465	0.975024	0.23571	0.284432	0.458765	-1.18559	0.00886833	0.129629	-0.920654	0.0138807	0.0806761	-0.485065	0.0199068	0.124871	-0.570478	0.0628496	0.303895	-1.10801	5.89939e-08	4.7366e-07
Anapc10	-0.0987281	0.833384	0.981006	-0.217402	0.576371	0.981301	-0.296255	0.408877	0.578808	-1.15271	0.168561	0.390907	-0.883427	0.122041	0.300361	-0.297288	0.499441	0.746997	-0.500558	0.330584	0.655365	0.165901	0.552632	0.644081
Anapc11	0.265015	0.377328	0.955693	0.161681	0.553083	0.980133	-0.133925	0.639186	0.766623	0.417422	0.297821	0.527557	0.691648	0.0711393	0.216059	-0.423379	0.116866	0.351092	0.344535	0.315532	0.642392	0.237725	0.384462	0.484461
Anapc13	-0.171615	0.614534	0.962589	-0.112718	0.704885	0.992764	-0.751907	0.0178064	0.0794046	0.192756	0.59003	0.76719	0.637423	0.0570971	0.189375	-0.0203614	0.929039	0.97393	0.0817649	0.7617	0.91687	0.486121	0.0106767	0.0236156
Anapc2	0.720882	0.270909	0.955693	0.0693775	0.883169	0.996527	1.45781	0.0148543	0.0712377	-0.506155	0.119697	0.330815	-0.871044	0.00378215	0.0334923	-0.459411	0.0230192	0.135375	-0.522527	0.0362497	0.23295	-0.953022	8.56794e-07	5.47076e-06
Anapc4	-0.246062	0.396697	0.955693	-0.122075	0.625354	0.986881	-0.447482	0.0742203	0.193714	-0.467836	0.160473	0.38059	-0.916257	0.00346517	0.0314385	-0.169892	0.44176	0.703365	-0.576288	0.0316803	0.218954	-0.795142	5.80493e-05	0.000240887
Anapc5	0.0432082	0.854369	0.984587	-0.017859	0.947278	0.997148	0.141446	0.525912	0.678114	-0.259362	0.409694	0.629132	-0.215133	0.457444	0.657917	-0.34618	0.0666004	0.258526	-0.455221	0.0522277	0.279631	-0.715236	7.61265e-05	0.000307962
Anapc7	0.249386	0.427176	0.955693	0.218908	0.436719	0.965521	0.66546	0.0144993	0.070193	0.210729	0.509265	0.708036	-0.299859	0.317255	0.532673	-0.139493	0.478549	0.732573	-0.364885	0.144629	0.459387	-0.11862	0.510156	0.606878
Angpt1	-0.544966	0.13183	0.955693	-0.475922	0.146621	0.855718	-0.925774	0.00620128	0.0415082	-0.615957	0.447603	0.663263	0.0445608	0.954692	0.980473	0.492951	0.179128	0.447371	0.212474	0.611579	0.845961	-2.4231	1.73648e-15	4.53666e-14
Angpt2	-0.29036	0.602234	0.96167	-0.771248	0.111912	0.81513	-0.487871	0.273354	0.446746	-0.375035	0.464029	0.675337	0.502283	0.198141	0.400698	0.175767	0.522143	0.763027	-0.0145259	0.979706	0.996299	-1.6406	1.60327e-09	1.7205e-08
Angptl2	0.228178	0.496551	0.955693	0.153155	0.612924	0.986881	0.619397	0.0491497	0.149638	0.699656	0.0428697	0.217195	0.271786	0.394019	0.604895	0.150576	0.444058	0.704775	0.616978	0.0160731	0.155285	-2.31214	6.06184e-32	7.65787e-30
Angptl4	0.249135	0.511122	0.955693	-0.362237	0.332263	0.958807	0.00876107	0.972669	0.984507	0.579946	0.0840414	0.282973	0.344351	0.264665	0.477642	0.513441	0.0145638	0.103062	0.43092	0.0946625	0.374343	-0.641307	0.00132161	0.00383533
Ank	-0.31895	0.243093	0.955693	-0.40201	0.10488	0.805774	-0.85607	0.000415706	0.00735593	0.29164	0.357089	0.584982	0.330019	0.274915	0.487887	0.0268435	0.885364	0.955902	0.0775446	0.738788	0.905898	-1.53163	3.7527e-18	1.38199e-16
Ank2	0.099493	0.741194	0.974136	0.0646613	0.808844	0.996172	0.229996	0.403029	0.573935	-0.194071	0.598398	0.773476	0.101824	0.748682	0.867508	0.214989	0.283448	0.568605	0.0949316	0.735608	0.904778	0.600763	0.00129011	0.00374826
Ank3	0.0493746	0.847917	0.984087	0.205292	0.412087	0.960673	-0.229914	0.369343	0.543299	-0.101401	0.747993	0.865838	-0.00833081	0.977522	0.99117	-0.0318319	0.873643	0.949765	-0.0380304	0.876405	0.962849	-0.598971	0.0015918	0.00452212
Ankfy1	-0.206703	0.460371	0.955693	-0.0829367	0.748312	0.9929	-0.0694483	0.778783	0.861096	-0.861069	0.0313718	0.19512	-0.732342	0.0420501	0.159448	-0.152956	0.467581	0.724268	-0.201133	0.487306	0.780502	-0.857726	2.81344e-05	0.000125742
Ankhd1	-0.148269	0.582591	0.96034	0.110897	0.624973	0.986881	0.221528	0.342963	0.517191	-0.843611	0.0907326	0.292006	-0.209076	0.688373	0.830809	0.0324634	0.899314	0.961408	-0.34151	0.373901	0.690271	-0.779171	4.27408e-05	0.000182366
Ankib1	-0.114449	0.674873	0.967962	-0.0229432	0.932285	0.996527	-0.301083	0.200809	0.366309	0.143452	0.652661	0.807833	-0.232376	0.440943	0.64439	0.0361785	0.854651	0.942157	-0.0338115	0.890765	0.967597	-0.139934	0.461826	0.559687
Ankle1	0.411784	0.417127	0.955693	-0.525595	0.357452	0.960134	0.208986	0.622668	0.755113	0.144327	0.713415	0.845491	-0.640588	0.0800866	0.231887	-0.409148	0.076664	0.277615	-0.0715223	0.806322	0.936035	-1.24056	4.37801e-08	3.60797e-07
Ankle2	0.0331577	0.894141	0.98914	0.187409	0.468167	0.967931	0.072079	0.775649	0.858963	-0.393902	0.277368	0.506892	-0.295897	0.407377	0.616512	-0.120324	0.558388	0.787625	-0.398614	0.140757	0.454302	-0.583585	0.00199538	0.00549117
Ankmy2	0.329072	0.446668	0.955693	0.0230215	0.929343	0.996527	0.438059	0.247686	0.420283	-1.04265	0.074869	0.26697	-0.650156	0.152777	0.343017	0.0588552	0.845738	0.937759	-0.206633	0.589027	0.83223	-0.730036	0.000571252	0.00182319
Ankra2	-0.567033	0.205556	0.955693	-0.736666	0.0746071	0.716011	-0.914746	0.0255992	0.100227	-0.462442	0.30616	0.536296	-0.66823	0.109814	0.281479	-0.0630153	0.832977	0.931576	-0.117414	0.75655	0.914533	0.226691	0.306915	0.403932
Ankrd1	-0.561603	0.0792528	0.955693	-1.61308	4.34596e-08	1.80719e-05	-1.43252	2.71746e-06	0.000182015	0.245637	0.447839	0.663317	0.415131	0.165896	0.360021	0.999008	1.2519e-06	9.32383e-05	0.572775	0.0250327	0.194322	1.61898	4.25837e-15	1.0678e-13
Ankrd10	-0.573229	0.152858	0.955693	0.129178	0.699577	0.991307	-0.593669	0.0780911	0.20019	0.578338	0.12212	0.333952	0.300369	0.37369	0.58732	-0.39508	0.0851809	0.296411	-0.249381	0.370514	0.687213	-0.33027	0.116631	0.181472
Ankrd11	0.204045	0.406078	0.955693	0.649808	0.00286743	0.132708	0.307704	0.168662	0.326954	0.988208	0.00494972	0.100403	1.39709	1.43113e-05	0.000629192	1.02284	6.39832e-07	5.14962e-05	0.610753	0.0118233	0.135456	0.591734	0.00108109	0.00320729
Ankrd12	-0.672191	0.107619	0.955693	-0.675009	0.0855415	0.748207	-0.855621	0.0325141	0.114945	-0.0110578	0.97866	0.990729	0.728368	0.0516025	0.177706	0.507677	0.0173642	0.114597	0.380464	0.18048	0.510174	0.0779612	0.677941	0.753879
Ankrd13a	0.141835	0.636892	0.962838	0.0736216	0.779171	0.995877	-0.151589	0.608381	0.74453	0.843244	0.0122186	0.143799	0.559019	0.0651334	0.204921	0.138886	0.49639	0.744735	0.321082	0.212434	0.544079	-0.0303004	0.859433	0.898977
Ankrd13b	0.243816	0.61256	0.962589	-0.145029	0.776521	0.995877	0.551819	0.203251	0.36927	1.10387	0.00340477	0.0850948	0.729451	0.0311809	0.132307	0.374054	0.0681563	0.261457	0.636656	0.0137845	0.146506	0.526012	0.00553462	0.0132873
Ankrd13c	-0.106888	0.704268	0.972787	0.0186201	0.929302	0.996527	-0.188056	0.431311	0.597762	0.160842	0.633304	0.795416	-0.42943	0.171376	0.365456	-0.259578	0.190974	0.463052	0.241133	0.319529	0.645806	-0.497693	0.00652779	0.0153303
Ankrd16	-0.784826	0.121498	0.955693	-0.518157	0.266626	0.946088	-0.750647	0.0732746	0.1924	-0.114071	0.767953	0.878515	-0.0666928	0.852941	0.928104	0.329268	0.141476	0.392203	-0.0274888	0.924364	0.979555	0.0308285	0.879599	0.913465
Ankrd17	-0.114843	0.675286	0.967962	0.241917	0.283493	0.948861	-0.293221	0.209095	0.375713	-0.683551	0.118458	0.329032	-0.833426	0.056957	0.189162	-0.0870878	0.67082	0.849892	-0.257418	0.385093	0.69966	-1.31715	2.58067e-12	4.29252e-11
Ankrd24	0.132645	0.820242	0.981006	-0.961057	0.103516	0.80209	-0.396388	0.393281	0.565391	0.280981	0.513967	0.711033	0.582751	0.116299	0.291577	0.507267	0.0417976	0.195108	0.395435	0.205504	0.539027	1.13798	8.45164e-07	5.40265e-06
Ankrd26	-0.477401	0.183067	0.955693	0.0503323	0.858679	0.996527	-0.405017	0.190655	0.354747	0.114122	0.745766	0.865218	0.486701	0.127718	0.30884	0.0984177	0.648318	0.836713	-0.067264	0.798185	0.932883	-0.689722	0.000872587	0.00265016
Ankrd27	0.369025	0.289532	0.955693	-0.243654	0.45914	0.967931	-0.0910216	0.785436	0.864656	-0.250634	0.418218	0.637418	-0.373122	0.194222	0.396469	-0.101024	0.601692	0.810157	-0.0207185	0.929593	0.981442	-0.363859	0.0430955	0.0787429
Ankrd28	0.184649	0.561099	0.957503	0.401346	0.179367	0.891918	0.599125	0.0339743	0.117808	-1.48502	0.0107906	0.136551	-1.70438	0.00064783	0.0098407	-0.0607173	0.777327	0.906064	-0.512383	0.10652	0.398152	-1.87695	1.31598e-18	4.99371e-17
Ankrd32	-0.169923	0.641661	0.962838	-0.307448	0.353105	0.960134	-0.0567765	0.858198	0.914556	-0.232449	0.639576	0.799861	-1.10283	0.0223376	0.108482	0.190388	0.439288	0.702016	0.299216	0.343089	0.664731	-0.758544	0.000390089	0.00131301
Ankrd37	-1.23327	0.0437873	0.955693	-1.83593	0.00107319	0.0690993	-1.56546	0.00157988	0.0171197	-0.520586	0.266358	0.49502	-1.06309	0.0114374	0.0710299	-0.923077	0.00213297	0.0298556	-0.553028	0.126874	0.43363	-0.382244	0.130916	0.199473
Ankrd40	0.00866518	0.972695	0.999533	-0.751853	0.0402604	0.593115	0.0162175	0.960363	0.977204	0.193356	0.562761	0.747121	0.0714554	0.820809	0.90968	0.16225	0.437451	0.700938	0.700496	0.00563971	0.0923367	0.171617	0.378282	0.478062
Ankrd44	-0.108851	0.766845	0.974201	-0.29014	0.362729	0.960134	-0.134019	0.667174	0.78746	-0.180578	0.690649	0.830043	0.053727	0.892658	0.948948	0.614825	0.0027286	0.0350662	0.324935	0.252232	0.58555	-0.833509	4.88492e-05	0.000206662
Ankrd46	0.428469	0.335599	0.955693	0.183124	0.65188	0.990305	0.830504	0.0267865	0.102779	-0.0818299	0.805077	0.90062	-0.310011	0.318594	0.533884	0.0820996	0.688263	0.859468	-0.331626	0.176165	0.504589	0.211423	0.228738	0.317895
Ankrd49	0.0255177	0.933048	0.994867	-0.358755	0.320711	0.955146	-0.339396	0.298253	0.472546	-2.23182	0.00514857	0.103304	-1.51831	0.00907996	0.0605305	-0.549311	0.0769125	0.278146	-0.959819	0.0399207	0.24451	-0.80086	0.000255454	0.000902274
Ankrd50	0.397916	0.318517	0.955693	-0.0351224	0.955618	0.998173	0.0944624	0.786222	0.865104	-0.107715	0.756465	0.871568	-0.65562	0.0548935	0.184768	-0.283312	0.242254	0.52331	0.0596325	0.835286	0.947382	-1.29067	6.11811e-08	4.90431e-07
Ankrd52	0.259198	0.503271	0.955693	0.057092	0.854572	0.996527	0.341325	0.373979	0.548224	0.128467	0.732115	0.857608	-0.1314	0.710343	0.844504	-0.517605	0.0500188	0.217705	0.184861	0.532675	0.802072	-0.678414	0.00858853	0.0195203
Ankrd54	0.177772	0.684205	0.970421	-0.119898	0.809446	0.996172	0.750553	0.044533	0.140158	0.575736	0.129987	0.344045	0.1664	0.633065	0.795233	-0.0492192	0.827628	0.929282	-0.00968236	0.973945	0.995251	0.134263	0.51522	0.611257
Ankrd57	-0.478451	0.27471	0.955693	-1.11843	0.00906772	0.2828	-1.00685	0.00883663	0.0516938	0.795699	0.0474341	0.223282	1.44045	0.000121962	0.00294716	0.0180036	0.94448	0.978929	0.367783	0.207167	0.541378	-0.466555	0.0254833	0.0502119
Ankrd6	0.114323	0.805341	0.979835	0.061651	0.879406	0.996527	-0.238763	0.664632	0.785365	0.614009	0.167624	0.389768	0.956741	0.0146926	0.083694	0.137117	0.590445	0.802593	0.365476	0.23029	0.561655	-0.541412	0.015349	0.0323854
Anks1	0.403973	0.300644	0.955693	0.208355	0.565435	0.980133	0.40524	0.224748	0.393478	0.559628	0.121779	0.333523	0.674526	0.0410072	0.157155	0.0746663	0.743226	0.888098	0.216527	0.397626	0.708536	-0.0246269	0.894416	0.924332
Anks1b	-0.510354	0.281649	0.955693	-0.622361	0.147212	0.856128	-0.806353	0.0386307	0.127915	-0.0495245	0.913105	0.959242	-0.645668	0.0904204	0.249143	-0.029956	0.913972	0.967894	0.31337	0.329193	0.654529	-1.67242	1.9368e-12	3.31549e-11
Anks3	0.159333	0.760232	0.974198	-0.461529	0.421481	0.962619	1.5371	0.00085588	0.011496	0.425783	0.236824	0.46679	-0.124424	0.71695	0.849238	0.485311	0.0194276	0.123103	0.136916	0.602989	0.840822	0.915251	8.29438e-07	5.31991e-06
Anks6	0.369725	0.56399	0.957503	0.418456	0.456605	0.967686	1.24807	0.0162421	0.0756026	0.93309	0.0298246	0.191585	1.27024	0.00122236	0.0153256	0.422373	0.112602	0.34503	0.338593	0.271765	0.604901	0.679852	0.00170616	0.00480324
Ankzf1	-0.0224586	0.995536	1	-0.216706	0.75404	0.9929	0.467668	0.403404	0.574049	0.420314	0.309276	0.539046	0.323563	0.388582	0.60041	1.01375	1.83882e-05	0.000815618	0.590051	0.0453481	0.261418	1.32102	7.97619e-12	1.23606e-10
Anln	-0.0707927	0.819212	0.981006	-0.286858	0.287909	0.948861	-0.485629	0.0969285	0.22802	-0.687855	0.0681482	0.256552	-0.686809	0.0363392	0.146582	-0.410441	0.0780289	0.280927	-0.508381	0.0769704	0.336978	-1.25141	7.04655e-09	6.71677e-08
Ano10	0.262438	0.515409	0.956456	-0.13654	0.758622	0.993133	0.242279	0.489009	0.646998	-0.030456	0.925787	0.965537	-0.373775	0.21916	0.425032	-0.0414279	0.833689	0.932133	-0.113271	0.640327	0.856505	0.231214	0.200758	0.28476
Ano6	0.215394	0.447105	0.955693	0.345644	0.183894	0.893789	0.0833025	0.739369	0.836895	-0.240072	0.48668	0.692459	0.0532776	0.864054	0.93396	0.277558	0.139517	0.3885	0.209864	0.395786	0.707241	-0.63391	0.000343638	0.00117369
Anp32a	-0.0538096	0.860992	0.986037	0.0982608	0.674321	0.99077	-0.870077	0.00147294	0.0164023	0.516785	0.106165	0.31345	1.00427	0.000955294	0.0129176	-0.070459	0.711031	0.871548	0.375437	0.130512	0.43917	0.174788	0.385073	0.484924
Anp32b	-0.392019	0.279377	0.955693	-0.346099	0.300471	0.95446	-1.17836	0.000231852	0.00498682	0.516268	0.1156	0.325534	0.821311	0.0066526	0.0490347	0.132977	0.490486	0.74145	0.735036	0.00326165	0.0677673	0.698675	0.000357902	0.0012174
Anp32e	0.0443311	0.847675	0.984087	0.160038	0.461811	0.967931	0.197217	0.374667	0.549071	0.688377	0.0433238	0.217436	0.727174	0.0210087	0.105202	-0.110511	0.589485	0.802063	0.365369	0.157748	0.477793	0.103621	0.583982	0.67253
Antxr1	0.0674363	0.793207	0.978114	0.246131	0.31451	0.955127	-0.235617	0.350918	0.524446	0.0224843	0.942556	0.974385	0.244838	0.396619	0.607002	-0.167573	0.378388	0.656022	0.216598	0.351533	0.672733	-1.38346	3.08908e-14	6.73123e-13
Antxr2	-0.0940584	0.751225	0.974136	0.056785	0.810728	0.996172	-0.260029	0.297038	0.471266	0.435826	0.238435	0.468975	0.783672	0.0254928	0.117811	0.848017	0.00026016	0.00669174	0.276269	0.323008	0.649617	0.953504	7.32719e-06	3.74617e-05
Anxa1	-0.770915	0.0588621	0.955693	-0.72284	0.0597048	0.682733	-1.39731	0.000176826	0.00419174	-1.96505	0.0121944	0.143684	-1.38449	0.0302664	0.129806	-1.01051	0.00656897	0.0626154	-1.28812	0.00523013	0.0888256	-1.77706	1.12004e-14	2.6056e-13
Anxa11	-0.43712	0.263284	0.955693	-0.546676	0.131925	0.842902	-0.299222	0.368597	0.542726	0.728716	0.0304208	0.19264	0.767405	0.0157166	0.087463	0.196879	0.324051	0.609275	0.502158	0.0530891	0.281077	-0.172829	0.334979	0.432706
Anxa2	0.272348	0.314693	0.955693	0.0393769	0.859652	0.996527	0.00846682	0.9673	0.982156	-0.962126	0.0140685	0.151623	-0.819579	0.00871245	0.0588695	-0.408356	0.0396631	0.189306	-0.394626	0.115902	0.413298	-0.277444	0.130628	0.199241
Anxa3	-0.291038	0.329636	0.955693	-0.308269	0.246056	0.93973	-1.68255	1.03762e-09	3.04572e-07	-1.12031	0.0105954	0.136551	-0.592046	0.121117	0.298668	-0.570931	0.0163065	0.110248	-0.900139	0.00149178	0.0424012	0.114321	0.598123	0.684627
Anxa4	0.214415	0.414984	0.955693	0.254444	0.271086	0.948435	0.594853	0.0106498	0.0585591	-0.0111059	0.971063	0.987689	0.200723	0.479158	0.675328	-0.00265078	0.989403	0.999012	0.032839	0.887078	0.966556	0.047588	0.782312	0.838972
Anxa5	-0.312389	0.294731	0.955693	-0.175662	0.514835	0.975024	-0.612361	0.0181846	0.0804799	-0.561972	0.0819946	0.28005	-0.360857	0.212525	0.417603	-0.582996	0.00202946	0.0289757	-0.566113	0.0174831	0.161816	-0.349557	0.0495631	0.0885402
Anxa6	0.235371	0.427086	0.955693	0.303069	0.266643	0.946088	0.295257	0.276671	0.450216	0.234406	0.458922	0.672168	0.506958	0.113405	0.286649	0.00207101	0.99149	0.99995	0.170608	0.472436	0.770017	-0.259824	0.134122	0.203487
Anxa7	-0.390249	0.181648	0.955693	-0.0189723	0.950665	0.997229	0.485414	0.0513581	0.153909	-0.459809	0.152909	0.371388	-0.490041	0.0922109	0.25192	-0.283932	0.171959	0.436902	-0.232003	0.331079	0.655365	-0.171715	0.316875	0.413982
Anxa8	-0.266127	0.608206	0.96167	0.580721	0.138345	0.849303	-0.599632	0.114122	0.252805	-0.396843	0.466019	0.676454	-0.604506	0.168189	0.361986	-0.0413702	0.924033	0.971745	-0.441284	0.278502	0.609987	-1.02624	0.000949278	0.00285872
Anxa9	-1.48141	0.104779	0.955693	-1.25572	0.214089	0.924379	-1.86897	0.0180697	0.0801137	-0.337291	0.499586	0.701839	0.327483	0.415394	0.623403	0.492542	0.0772825	0.279045	0.350612	0.333188	0.656379	1.03136	1.63534e-05	7.68754e-05
Aoc2	0.234526	0.66643	0.967797	0.269779	0.601715	0.986851	0.318923	0.517429	0.67195	0.178402	0.700445	0.837279	0.465651	0.255598	0.467705	0.327194	0.213467	0.488176	0.183606	0.562536	0.819992	0.515679	0.0279893	0.0545041
Aof1	-0.048675	0.907115	0.991053	0.16717	0.612522	0.986881	-0.191845	0.54137	0.69117	0.20039	0.579064	0.760008	0.722062	0.0269693	0.121679	-0.0188671	0.93323	0.975744	-0.00114993	0.997673	1	-0.775975	0.000236865	0.00084245
Aox1	-0.358162	0.563309	0.957503	0.245321	0.651638	0.990305	1.30869	0.00426515	0.0329715	-0.475541	0.30941	0.53909	1.68736	1.48192e-05	0.000643022	0.68747	0.0101864	0.0834915	0.430027	0.197094	0.529685	-1.86208	1.34098e-12	2.34789e-11
Ap1b1	0.3266	0.318845	0.955693	0.119927	0.672306	0.99077	0.628112	0.0240494	0.0964357	0.053793	0.863397	0.932644	0.137335	0.636328	0.797118	-0.0117813	0.95326	0.982629	0.132688	0.579085	0.828572	-0.416016	0.0239917	0.0476966
Ap1g1	0.228428	0.51084	0.955693	0.416396	0.204152	0.917386	0.770487	0.0146043	0.0705391	-0.625029	0.158335	0.378185	-0.418255	0.34517	0.559584	-0.0350059	0.869669	0.948229	0.0259339	0.926304	0.980524	-0.994029	5.42065e-08	4.39465e-07
Ap1m1	0.320873	0.291389	0.955693	0.0255471	0.912692	0.996527	0.282333	0.293102	0.467593	0.0308201	0.924006	0.964601	-0.357867	0.222628	0.429148	-0.211794	0.265815	0.548333	0.175446	0.473406	0.770304	0.0395139	0.827433	0.873218
Ap1s1	0.446215	0.458684	0.955693	0.0314237	0.928543	0.996527	1.04645	0.0674243	0.182802	0.323777	0.326713	0.555373	-0.039547	0.895344	0.94968	-0.42475	0.0252374	0.14409	-0.0428141	0.86098	0.958031	-0.395461	0.0258719	0.0508973
Ap1s2	-0.176531	0.672587	0.967922	-0.0984079	0.810344	0.996172	-0.541106	0.126925	0.270586	0.692421	0.152569	0.371194	-1.29604	0.00208758	0.0220934	-0.0236387	0.952494	0.982629	-0.122786	0.739352	0.906144	-0.31148	0.277003	0.371123
Ap1s3	1.75001	0.00810656	0.955693	1.6301	0.0036472	0.155879	0.245385	0.61895	0.752416	-0.0484417	0.92804	0.96689	0.264118	0.513537	0.703704	0.486162	0.0965878	0.316463	-0.0481889	0.900811	0.971167	0.568106	0.0611216	0.105517
Ap2a1	0.578127	0.258904	0.955693	0.140408	0.744938	0.9929	1.25432	0.00670323	0.0433665	0.266841	0.468015	0.678401	0.0319303	0.925964	0.96513	-0.308004	0.183135	0.453184	-0.103813	0.707	0.890734	-0.429975	0.0476564	0.0856493
Ap2a2	-0.270812	0.363046	0.955693	-0.0485901	0.85959	0.996527	-0.865866	0.000659664	0.0097968	0.0963175	0.776172	0.883261	0.131041	0.679095	0.825407	-0.357462	0.10835	0.337915	-0.430225	0.101	0.387663	-0.606639	0.00364251	0.00923583
Ap2b1	0.305589	0.324819	0.955693	0.135591	0.605139	0.986881	0.724371	0.00702901	0.0445806	-0.62544	0.0742615	0.265829	-0.601533	0.0801149	0.231887	-0.469286	0.0287767	0.156434	-0.218367	0.415423	0.725116	-0.891614	9.67751e-07	6.0858e-06
Ap2m1	0.312154	0.27689	0.955693	0.259753	0.316378	0.955127	0.618704	0.0164209	0.0759267	-0.288949	0.396241	0.617888	-0.290269	0.326237	0.541663	-0.0450136	0.810425	0.921189	0.0384976	0.86949	0.961497	0.494818	0.00506742	0.0122988
Ap2s1	0.129458	0.66327	0.967797	0.268635	0.336454	0.960134	0.507448	0.0601965	0.169637	0.304095	0.46126	0.67348	0.206877	0.601643	0.771672	-0.790516	0.00254982	0.0334832	0.0753804	0.831869	0.945887	-0.287531	0.271749	0.365063
Ap3b1	-0.0256257	0.942505	0.99663	0.130896	0.589385	0.986372	0.182395	0.450974	0.615273	0.0124253	0.968117	0.986906	0.0354693	0.906573	0.955799	0.043261	0.824021	0.92753	-0.00446415	0.985745	0.998571	-0.327973	0.067199	0.114484
Ap3d1	0.0569626	0.81643	0.981006	-0.0222692	0.937375	0.996908	0.0427168	0.848018	0.907778	0.136237	0.680631	0.823357	0.245091	0.431778	0.63792	0.0760613	0.720216	0.875559	0.231833	0.355453	0.676473	-0.349822	0.074255	0.124528
Ap3m1	-0.405175	0.237586	0.955693	-0.255573	0.415629	0.960673	-0.261975	0.386408	0.559702	-1.30601	0.0461811	0.222371	-1.51861	0.00951031	0.0624016	-0.694326	0.0494574	0.216531	-0.306537	0.502076	0.787327	-0.272551	0.153036	0.22721
Ap3s1	-0.496893	0.149289	0.955693	-0.373639	0.218955	0.929887	-1.18657	0.000201527	0.00457099	0.618817	0.148514	0.365427	-0.525714	0.21148	0.416205	0.226437	0.474041	0.729831	0.209111	0.576276	0.827707	0.543544	0.0868835	0.141961
Ap3s2	0.29297	0.41889	0.955693	0.121982	0.708233	0.992764	0.919015	0.00299745	0.0261581	-0.0834897	0.805333	0.900631	-0.138612	0.665341	0.814936	-0.103033	0.642034	0.833269	0.144891	0.582598	0.830393	0.136458	0.517889	0.613548
Ap4b1	-0.484952	0.270322	0.955693	-0.604361	0.140896	0.852031	-0.267032	0.453672	0.617688	-0.639115	0.152268	0.370734	-0.231972	0.553519	0.734981	0.721974	0.00152422	0.0235112	-0.133236	0.645098	0.858146	0.412258	0.0375974	0.070135
Ap4e1	-0.398489	0.33868	0.955693	-0.348887	0.365605	0.960134	-0.0819215	0.811393	0.881239	-0.394478	0.31495	0.544878	-0.0478549	0.894105	0.949111	-0.158037	0.532784	0.768935	-0.17738	0.551402	0.813571	-0.573729	0.0141019	0.030117
Ap4m1	0.48458	0.315629	0.955693	-0.0821466	0.894217	0.996527	1.32626	0.000816214	0.0111282	-0.761529	0.0528942	0.23209	-0.444946	0.192144	0.394162	-0.00058037	0.99838	1	-0.0466592	0.866975	0.960502	-0.832637	1.66083e-05	7.78904e-05
Ap4s1	0.259959	0.548938	0.957503	0.308705	0.445239	0.966496	-0.47344	0.274519	0.447809	0.113605	0.800644	0.898696	-0.584836	0.13343	0.317512	-0.335277	0.251306	0.533139	-0.226456	0.509531	0.790597	0.204004	0.400168	0.500235
Apaf1	0.062417	0.834642	0.981006	1.22853	2.42956e-06	0.000621717	0.489602	0.0704024	0.188066	-0.401686	0.336108	0.563793	-1.0366	0.0195572	0.100557	-0.406079	0.107099	0.335905	-0.194187	0.505028	0.789008	-1.0078	1.56157e-06	9.44515e-06
Apba1	0.255085	0.638922	0.962838	-0.630192	0.368446	0.960134	-0.849592	0.155517	0.30947	0.93764	0.0705568	0.261173	0.217771	0.638215	0.798407	0.597019	0.0920604	0.30903	0.57913	0.136818	0.448989	2.50125	6.31916e-17	1.9286e-15
Apba3	0.805874	0.245074	0.955693	-0.273956	0.721017	0.9929	2.0789	0.000916219	0.0120472	0.495096	0.209509	0.438246	0.872069	0.0168725	0.0915152	-0.178576	0.458651	0.717068	-0.192783	0.523006	0.797551	0.646321	0.00430923	0.0106768
Apbb1ip	-0.37126	0.28012	0.955693	-0.292149	0.329804	0.958406	-0.851319	0.00380178	0.0305735	0.948489	0.00590967	0.110119	0.392923	0.204174	0.406879	0.409926	0.0403322	0.1914	0.807198	0.00116294	0.0367284	1.20606	4.01587e-09	4.00784e-08
Apbb2	0.44995	0.25427	0.955693	0.315759	0.403237	0.960134	0.0921166	0.792155	0.868683	0.641765	0.0501677	0.22789	0.938695	0.00244135	0.0243647	0.790319	0.000269481	0.00686075	0.829802	0.00147881	0.0424012	-1.7551	3.41531e-12	5.59684e-11
Apc	-0.443894	0.224462	0.955693	-0.0254786	0.95315	0.997921	-0.254519	0.434533	0.60056	-0.509409	0.252108	0.482092	-0.116756	0.778599	0.884207	0.256796	0.22846	0.506448	0.107647	0.736166	0.905129	-0.541303	0.00331925	0.0085157
Apcdd1	0.264778	0.50527	0.955693	0.0918322	0.790852	0.996172	0.107716	0.751113	0.844178	0.218355	0.543981	0.733442	0.0483253	0.884749	0.944714	-0.697635	0.00132545	0.0214392	0.158821	0.549093	0.812021	-2.00868	2.762e-21	1.35122e-19
Apeh	0.604189	0.269037	0.955693	-0.178769	0.759279	0.993133	1.18757	0.0117153	0.0620259	0.0797966	0.810094	0.903544	-0.326339	0.320324	0.534946	-0.124559	0.557967	0.787291	-0.0069089	0.979104	0.996299	-0.452499	0.0189249	0.0388383
Apex1	0.345804	0.454588	0.955693	0.288346	0.498775	0.974559	0.702757	0.0808691	0.204271	2.05688	0.000240801	0.0273091	1.50253	0.00383347	0.0338267	0.584532	0.111663	0.342921	1.13093	0.0187444	0.167373	1.52844	2.80312e-05	0.000125336
Apex2	0.24543	0.61926	0.962615	0.0932832	0.835645	0.996172	0.6371	0.142465	0.291334	0.0161844	0.969219	0.987293	0.00597804	0.987546	0.995828	-0.186341	0.446082	0.7071	0.347419	0.220288	0.552104	-0.0959651	0.648018	0.729358
Aph1a	0.360168	0.413387	0.955693	0.231141	0.569212	0.981301	1.23158	0.00234282	0.022396	0.573885	0.132755	0.346167	0.431419	0.238694	0.448787	-0.327158	0.114888	0.347767	0.857154	0.000926816	0.0328001	0.534636	0.0411689	0.0758489
Aph1b	-0.298186	0.624122	0.962838	0.0175486	0.96419	0.998839	0.277821	0.540395	0.690455	-0.289064	0.577996	0.759299	-0.539582	0.215274	0.421261	-0.238805	0.511217	0.756744	-0.80472	0.0424834	0.251176	-0.398217	0.2069	0.291936
Api5	0.0285512	0.897283	0.98914	0.352698	0.104256	0.805774	0.156461	0.474017	0.634991	0.609473	0.088401	0.28898	0.915593	0.0050306	0.0408839	-0.143599	0.456313	0.715363	-0.308969	0.210643	0.543952	-0.717061	0.000237774	0.000845079
Apip	-0.485282	0.251569	0.955693	-0.166441	0.646593	0.989904	-0.576197	0.162688	0.319801	0.27844	0.463473	0.675186	0.1169	0.734134	0.858118	0.202677	0.376926	0.655239	0.0917913	0.758212	0.915321	1.04122	1.19775e-07	9.09355e-07
Apitd1	0.0301693	0.921892	0.992307	0.015284	0.952409	0.9978	-0.243244	0.464428	0.627233	0.22356	0.599604	0.773955	0.101786	0.789916	0.890473	-0.125616	0.626059	0.824402	-0.484711	0.145219	0.459978	-0.775012	0.000829086	0.00253734
Aplf	0.340698	0.307841	0.955693	0.183964	0.558959	0.980133	0.167817	0.55324	0.701625	0.632877	0.0614179	0.247256	1.10745	0.00101895	0.0134234	0.566694	0.00696188	0.0652581	0.602174	0.0183134	0.166002	-0.35437	0.0582843	0.101444
Apln	-0.126249	0.73635	0.974136	-0.832572	0.0081349	0.261686	-1.80733	1.08961e-08	2.13222e-06	0.000755832	0.999083	1	0.0972753	0.782483	0.886299	-0.176112	0.476026	0.731445	-0.0796006	0.783746	0.925874	-1.42756	2.38289e-10	2.87561e-09
Aplp2	0.291854	0.340075	0.955693	0.317351	0.239346	0.939311	0.530922	0.0589371	0.16729	-0.594481	0.137176	0.351137	-0.473248	0.173027	0.367563	-0.305115	0.113204	0.345546	-0.301581	0.222237	0.554395	-0.130072	0.481587	0.579275
Apoa1bp	0.577628	0.372211	0.955693	-0.173127	0.831153	0.996172	1.2649	0.0234667	0.0948554	0.326506	0.288111	0.517428	0.439598	0.13659	0.321275	0.059295	0.758144	0.896437	0.265133	0.264217	0.597934	0.713786	7.27662e-05	0.000295928
Apob48r	0.580347	0.368979	0.955693	0.00606172	0.956412	0.998322	0.527463	0.354409	0.528069	1.75237	4.50486e-05	0.0102178	1.61199	8.50676e-05	0.00235173	1.84208	9.58752e-12	2.73381e-09	1.44484	9.59184e-06	0.00203674	2.48472	8.41807e-32	1.02454e-29
Apobec1	-0.077993	0.897409	0.98914	0.414843	0.355482	0.960134	-0.160672	0.716108	0.820806	-0.58891	0.211563	0.440426	-0.0939388	0.809238	0.903239	1.54135	1.48796e-09	2.51693e-07	0.621323	0.0628175	0.303895	1.61395	1.20442e-14	2.79538e-13
Apobec3	-0.215643	0.633084	0.962838	0.228587	0.524432	0.978125	0.75509	0.0222359	0.0915486	-0.646845	0.262517	0.491635	-0.484038	0.319445	0.534192	0.25921	0.290391	0.576034	0.383348	0.227695	0.558741	0.113829	0.610312	0.696025
Apold1	0.654011	0.31987	0.955693	0.897282	0.121941	0.830204	-0.357478	0.598819	0.738169	0.27518	0.743596	0.863821	-0.132378	1	1	0.519148	0.379052	0.656531	0.431837	0.505108	0.789009	-0.130449	1	1
Apoo	-1.3888	0.0298195	0.955693	-0.67711	0.203439	0.917386	-1.94662	0.00236062	0.0224547	-0.28098	0.754854	0.871019	-0.0684882	1	1	1.49011	0.00140817	0.0222638	1.40445	0.0073258	0.107202	1.54527	0.000481483	0.00157238
Apool	0.223982	0.604195	0.96167	0.0428142	0.907633	0.996527	0.0977928	0.791516	0.868543	-1.57757	0.0899016	0.29121	-1.63406	0.014687	0.083694	-0.636552	0.228542	0.506518	-0.225039	0.738329	0.905894	-1.10755	0.00381801	0.00961973
App	-0.0810897	0.772153	0.974201	0.0330755	0.877052	0.996527	0.132657	0.563819	0.709126	0.360426	0.357144	0.584982	0.545528	0.148315	0.337019	-0.266848	0.326364	0.610992	-0.167953	0.592317	0.834343	0.0469341	0.85374	0.894616
Appbp2	0.142065	0.635298	0.962838	0.204672	0.454155	0.967686	0.511697	0.0582972	0.165974	-0.446129	0.189764	0.41733	-1.0486	0.0021107	0.0222672	-0.292154	0.15399	0.411363	-0.771049	0.00402808	0.0773081	-0.255203	0.167297	0.243991
Appl1	-0.176437	0.545531	0.957503	-0.046517	0.865988	0.996527	-0.543409	0.0321052	0.114187	-0.768134	0.0927545	0.294242	-0.950514	0.0331721	0.138344	0.324347	0.199424	0.47332	0.0362215	0.911299	0.974965	0.400576	0.0753701	0.126143
Appl2	-0.365454	0.320806	0.955693	-0.381417	0.256495	0.93973	-0.371735	0.296346	0.470497	0.0411008	0.912746	0.959242	0.0175784	0.961069	0.983438	0.51619	0.0196086	0.123985	0.0292607	0.916924	0.976721	0.230986	0.238446	0.328777
Aprt	0.377368	0.302289	0.955693	0.034285	0.901102	0.996527	0.325566	0.340816	0.51491	0.321448	0.347171	0.57497	0.00713351	0.983433	0.99389	-0.397634	0.0542254	0.228622	-0.349881	0.188494	0.520091	0.232326	0.268787	0.362108
Aptx	0.170635	0.633922	0.962838	-0.0694212	0.866471	0.996527	-0.0840555	0.806222	0.877532	-0.196952	0.614026	0.783029	0.184746	0.593607	0.765861	0.348447	0.121979	0.359525	0.156689	0.577131	0.828029	0.795105	2.13276e-05	9.73411e-05
Aqp1	0.138137	0.731519	0.973401	0.0587357	0.861336	0.996527	-0.0889798	0.842008	0.903866	0.16575	0.609135	0.779513	0.0622448	0.839619	0.919828	-0.308665	0.130796	0.374025	-0.125398	0.617331	0.846853	-1.43298	4.89694e-12	7.84606e-11
Aqp7	0.607109	0.492695	0.955693	0.353636	0.713751	0.992764	-0.201521	0.752103	0.844793	-0.26025	0.778977	0.885241	0.396818	0.624579	0.788725	0.195562	0.882874	0.954474	0.465522	0.559817	0.818657	-0.796314	0.272963	0.366398
Aqr	0.263824	0.315946	0.955693	0.374802	0.111534	0.81513	0.16347	0.489658	0.647425	-0.4132	0.226838	0.455665	-0.156535	0.631402	0.794427	0.015641	0.941852	0.97842	-0.173475	0.489853	0.781996	-0.329084	0.0845018	0.138614
Araf	-0.387868	0.261622	0.955693	-0.777872	0.0158937	0.398195	-0.357918	0.222316	0.390932	-0.157586	0.68275	0.824622	-0.389638	0.314845	0.529951	-0.196116	0.488428	0.740113	-0.250332	0.442611	0.747042	0.409897	0.136409	0.206424
Arap1	0.637049	0.238811	0.955693	-0.100598	0.881029	0.996527	0.78632	0.0968729	0.227963	1.42338	0.00109786	0.0502596	1.25082	0.00235727	0.0238354	0.344992	0.259471	0.542194	0.507199	0.147453	0.464074	-0.100152	0.728015	0.795677
Arcn1	0.0707277	0.779953	0.974201	0.113463	0.631463	0.988394	-0.0598889	0.810221	0.880302	-1.05677	0.0128672	0.146258	-1.02626	0.0173478	0.0929814	-0.173184	0.39306	0.666793	-0.446153	0.155665	0.476111	-0.140547	0.438192	0.537574
Ard1a	0.347489	0.395597	0.955693	-0.0401212	0.939506	0.996961	0.580147	0.101394	0.234131	0.284108	0.399238	0.620931	-0.19177	0.559971	0.739906	-0.0918092	0.648533	0.83675	0.00120207	0.996624	1	0.702758	0.000805305	0.00247367
Arf1	0.0176728	0.934266	0.994867	0.233561	0.297047	0.950256	0.176019	0.433508	0.599969	0.0988994	0.773395	0.881479	0.114454	0.720113	0.851018	-0.420925	0.0433395	0.199657	0.00776414	0.976559	0.99602	0.0443831	0.819393	0.866999
Arf2	-0.0213705	0.967789	0.998817	-0.0210324	0.963567	0.998839	0.00545952	0.974973	0.985938	-0.872528	0.0211245	0.171881	-1.18034	0.000615489	0.00949394	0.00487027	0.984184	0.996667	-0.183342	0.496774	0.784635	0.801863	2.62913e-05	0.000118139
Arf3	0.133564	0.61622	0.962615	-0.0605288	0.813404	0.996172	-0.246385	0.318422	0.492767	-0.137462	0.693409	0.832558	-0.600725	0.0606766	0.196928	-0.442157	0.0563379	0.233312	0.117795	0.671245	0.870569	-0.88307	0.000172037	0.000636136
Arf4	-0.575233	0.121378	0.955693	-0.231903	0.479807	0.970314	-0.704217	0.028872	0.10748	0.332847	0.324788	0.553469	0.115859	0.700033	0.837807	-0.572527	0.00577975	0.0575205	-0.407565	0.0934613	0.371907	0.372079	0.0411689	0.0758489
Arf5	0.503417	0.467378	0.955693	-0.526035	0.487468	0.972599	1.03951	0.114619	0.253243	0.679195	0.0514496	0.230152	0.417874	0.188374	0.388666	-0.12167	0.527514	0.765939	0.0853148	0.737249	0.90568	0.196052	0.286283	0.381253
Arf6	-0.27532	0.306735	0.955693	-0.717329	0.00332248	0.149362	-0.477717	0.044912	0.140994	0.712459	0.046876	0.222371	0.822885	0.0117485	0.0722612	0.0887899	0.653271	0.839204	0.0591954	0.814663	0.939381	0.15003	0.386366	0.48594
Arfgap1	0.446717	0.351033	0.955693	-0.067252	0.910278	0.996527	0.945312	0.0267336	0.102655	-0.332098	0.290274	0.519629	-0.827856	0.00618453	0.0468653	-0.0120999	0.952041	0.982629	-0.0500506	0.83494	0.947382	0.0815171	0.654593	0.735119
Arfgap2	0.5079	0.296354	0.955693	0.135911	0.748878	0.9929	1.11735	0.00946141	0.0541117	-0.255864	0.401994	0.622864	-0.566236	0.0535582	0.182116	0.141557	0.45421	0.713411	0.004634	0.984534	0.997832	0.131682	0.447063	0.545773
Arfgap3	-0.554311	0.117086	0.955693	-0.611504	0.0642311	0.68792	-0.485867	0.128777	0.272986	0.741034	0.0354127	0.203633	0.648668	0.0562899	0.187748	0.286336	0.194148	0.46768	0.398446	0.134924	0.446023	1.66282	4.50729e-19	1.80654e-17
Arfgef1	-0.212226	0.453531	0.955693	0.17391	0.465303	0.967931	-0.225767	0.361761	0.535108	-0.322609	0.353267	0.581399	-0.505866	0.218593	0.424511	0.0647778	0.775844	0.90497	-0.241968	0.399514	0.710215	-0.400575	0.0462318	0.0834799
Arfgef2	0.0396067	0.864532	0.986037	-0.0548914	0.816095	0.996172	0.0542619	0.803068	0.875682	-0.415406	0.211496	0.440378	-0.248387	0.408855	0.617835	-0.0156177	0.936651	0.977393	-0.209828	0.401709	0.712341	-0.665353	0.000680797	0.00213458
Arfip1	-0.258966	0.41917	0.955693	-0.124448	0.669655	0.990767	-0.603422	0.0338063	0.117475	-0.342929	0.372188	0.59756	-0.0215451	0.953386	0.979721	0.12325	0.632421	0.828397	-0.482501	0.108396	0.400367	-0.139912	0.512511	0.609085
Arfip2	-0.00686456	1	1	-0.023359	0.969718	0.998839	0.121545	0.700573	0.809882	0.426596	0.21743	0.447026	0.614334	0.0558698	0.186889	0.203125	0.3228	0.608299	0.112633	0.650256	0.860895	1.03554	8.94109e-09	8.36289e-08
Arfrp1	0.0857059	0.822603	0.981006	0.37865	0.330614	0.958807	0.1764	0.619585	0.752979	-0.712095	0.0465855	0.222371	-0.631353	0.0495677	0.174104	-0.0709263	0.730819	0.881079	-0.422232	0.0976081	0.380222	0.402225	0.0293805	0.05677
Arglu1	-0.21047	0.435057	0.955693	0.0847484	0.704309	0.992764	-0.712662	0.00521106	0.0373926	0.808292	0.0346966	0.202231	0.344699	0.349981	0.564541	0.477868	0.0962407	0.31626	0.211995	0.50028	0.786104	0.544008	0.0485559	0.0870935
Arhgap1	0.175351	0.558796	0.957503	-0.0363583	0.912741	0.996527	0.0204847	0.931124	0.959129	-0.40267	0.252821	0.48267	-0.474579	0.114068	0.287838	-0.126643	0.512559	0.75738	0.105741	0.677312	0.873734	0.12635	0.488794	0.585896
Arhgap10	0.110948	0.772878	0.974201	0.0160455	0.945625	0.997148	-0.0798232	0.848625	0.908137	0.608705	0.057328	0.238787	0.715193	0.0180986	0.0956452	0.290681	0.135941	0.383029	0.453009	0.06164	0.301823	-0.0593303	0.745213	0.809055
Arhgap11a	-0.0736747	0.789627	0.977712	0.0940831	0.677799	0.990842	0.0766779	0.745966	0.841093	0.0765927	0.810202	0.903544	-0.197063	0.510832	0.701813	0.0659476	0.754988	0.894973	0.0501338	0.84069	0.949474	-0.139416	0.4848	0.581934
Arhgap12	-0.542534	0.156497	0.955693	-0.46846	0.157244	0.862767	-0.768093	0.0195851	0.0841408	-0.506799	0.277114	0.506871	-0.142122	0.740093	0.861081	0.352601	0.21044	0.484362	-0.23635	0.502313	0.787327	0.18503	0.450139	0.548454
Arhgap17	-0.0790773	0.832745	0.981006	-0.0275329	0.942101	0.997148	0.282283	0.334923	0.509842	1.53194	0.000225833	0.0271544	1.43289	5.78037e-05	0.00179156	0.659288	0.00119437	0.020067	0.865805	0.00260608	0.0590077	1.22919	8.47939e-11	1.10476e-09
Arhgap18	-0.109435	0.766035	0.974201	-0.541702	0.0857864	0.749036	-0.328744	0.277825	0.451212	-1.02376	0.0228383	0.175916	-0.848096	0.037941	0.150199	-0.619467	0.0343165	0.174192	-0.602381	0.0724188	0.329197	-2.43411	2.73867e-20	1.22565e-18
Arhgap19	0.199663	0.575672	0.959708	-0.676248	0.0529691	0.655602	-0.0994984	0.773063	0.857145	-1.11927	0.00447105	0.0957534	-1.2852	0.000556669	0.00879043	-0.824862	5.28516e-05	0.0019965	-0.591492	0.0241643	0.19064	-0.477732	0.00891296	0.0201247
Arhgap21	0.205247	0.439153	0.955693	0.555227	0.0177435	0.421591	0.634782	0.00746451	0.0462419	-0.0633883	0.845235	0.919996	0.383307	0.200946	0.403585	0.161148	0.417964	0.685616	0.165469	0.53371	0.802324	0.0377884	0.834888	0.879479
Arhgap22	0.164406	0.661779	0.967558	-0.55406	0.133636	0.846067	0.204578	0.546556	0.696543	1.08365	0.00560626	0.107251	0.773151	0.0282126	0.125027	0.290969	0.164163	0.425946	0.453952	0.130949	0.439875	-0.73358	4.36154e-05	0.000185859
Arhgap24	-0.22862	0.533538	0.957503	-0.424097	0.199994	0.913894	-0.0752867	0.801046	0.874799	0.488955	0.167362	0.38961	0.587833	0.0731768	0.219512	0.62088	0.00279979	0.0357313	0.597972	0.0203614	0.172908	-0.472415	0.0125056	0.0271495
Arhgap28	0.304409	0.409783	0.955693	-0.128323	0.750292	0.9929	0.278313	0.390676	0.562944	-0.712396	0.142135	0.356361	-0.752606	0.0940051	0.255317	-0.19739	0.40239	0.673462	-0.349657	0.359497	0.679234	-1.32182	4.47634e-10	5.22767e-09
Arhgap29	-0.21345	0.449569	0.955693	-0.801578	0.00116699	0.0727909	-1.4976	6.6163e-09	1.56399e-06	0.329559	0.301455	0.53154	0.978339	0.00103961	0.0135981	0.351751	0.113868	0.346213	-0.0492259	0.842267	0.94963	0.133369	0.508265	0.60502
Arhgap5	-0.325331	0.262139	0.955693	-0.400897	0.135466	0.846325	-0.567241	0.0330107	0.115839	0.244632	0.656363	0.809185	0.00467414	0.994342	0.999047	1.66069	3.50447e-05	0.00142753	1.11021	0.0144341	0.148954	1.4917	0.000154625	0.00057796
Arhgdia	0.58298	0.308786	0.955693	-0.0824182	0.90299	0.996527	0.980577	0.0623209	0.17349	0.102534	0.784256	0.888207	-0.100068	0.778554	0.884207	-0.603372	0.0112065	0.0887628	0.0723958	0.803064	0.93544	-0.260603	0.253522	0.345319
Arhgdib	0.437519	0.243584	0.955693	0.0226692	0.929726	0.996527	0.919034	0.00737229	0.04587	-0.845499	0.0443648	0.219693	-0.396336	0.242169	0.452848	-0.154412	0.487794	0.739905	0.0555152	0.845356	0.950463	0.286595	0.152068	0.226074
Arhgef1	0.374277	0.434854	0.955693	-0.340638	0.467943	0.967931	0.827688	0.0525774	0.156217	0.905925	0.0126704	0.145506	0.547037	0.100345	0.265564	0.311155	0.113746	0.346089	0.495905	0.0576218	0.292803	0.433707	0.0140304	0.0300029
Arhgef10	0.0911363	0.764956	0.974201	-0.433231	0.145134	0.854977	-0.379842	0.191767	0.356128	0.702803	0.0527707	0.23209	0.731301	0.0273987	0.123004	0.2791	0.236608	0.516254	0.286637	0.306645	0.636748	0.763406	0.000395778	0.00132858
Arhgef10l	0.927925	0.102339	0.955693	-0.731051	0.192546	0.910628	0.793625	0.0986433	0.23021	0.959528	0.0159582	0.156256	0.484654	0.184233	0.382892	0.0678703	0.772449	0.903015	0.230924	0.440869	0.745363	-0.51851	0.0128249	0.027752
Arhgef11	0.295071	0.38183	0.955693	-0.0432084	0.908501	0.996527	0.513775	0.0765597	0.197535	0.503014	0.112452	0.322183	0.235532	0.443543	0.645944	0.354356	0.0740601	0.272825	0.726678	0.00215156	0.0523999	0.38433	0.0320376	0.061205
Arhgef12	0.0226868	0.918518	0.992307	0.0992903	0.647525	0.989904	0.162685	0.462992	0.626106	0.115377	0.71552	0.847181	0.504236	0.0869453	0.243808	0.0434457	0.831979	0.930921	0.187352	0.458157	0.759283	-0.51046	0.00983323	0.0219641
Arhgef17	0.478254	0.276051	0.955693	-0.277776	0.4841	0.97191	0.738295	0.0518567	0.154996	0.898756	0.0171559	0.160514	0.504595	0.15413	0.344145	0.0924306	0.681858	0.855859	0.468788	0.0862999	0.356635	-0.0754068	0.718581	0.788503
Arhgef18	0.196822	0.550392	0.957503	-0.183055	0.575845	0.981301	0.455986	0.120787	0.26154	0.894689	0.0108066	0.136551	0.977867	0.00243263	0.0243538	0.260458	0.190562	0.462726	0.24763	0.322199	0.649157	-0.336005	0.0638673	0.109462
Arhgef19	0.393082	0.45708	0.955693	0.659503	0.187702	0.900606	0.404489	0.386988	0.559951	0.806299	0.0711509	0.262051	-0.26913	0.526802	0.71472	-0.0619554	0.822241	0.926545	0.430824	0.214209	0.545848	-1.61823	2.19871e-11	3.17556e-10
Arhgef2	0.234123	0.497431	0.955693	-0.447387	0.16053	0.867557	0.227381	0.439202	0.604918	0.416919	0.199103	0.427047	0.76663	0.0118241	0.0725004	1.02877	1.37633e-07	1.40161e-05	0.760324	0.00149956	0.0424012	0.595271	0.000818653	0.00251003
Arhgef3	-0.681222	0.351537	0.955693	-0.83519	0.285995	0.948861	-0.98739	0.11349	0.251752	-0.372586	0.501701	0.703216	0.41464	0.351447	0.566264	0.552185	0.0923868	0.309507	0.0648726	0.901656	0.971579	-0.306653	0.357585	0.45653
Arhgef4	-1.07347	0.195108	0.955693	0.14783	0.83842	0.996172	0.551021	0.422921	0.590728	0.237688	0.607076	0.778243	0.371186	0.352162	0.566776	0.73779	0.00604968	0.0594208	0.37728	0.249443	0.583409	0.51401	0.0295669	0.057075
Arhgef5	0.358716	0.372746	0.955693	0.323035	0.389529	0.960134	0.835901	0.0167673	0.0767938	-0.509034	0.194834	0.421788	-0.248168	0.477549	0.674107	0.194624	0.353531	0.635603	0.426382	0.145428	0.460314	-0.826935	8.36088e-06	4.22489e-05
Arhgef7	0.567721	0.21642	0.955693	0.150875	0.705453	0.992764	1.14976	0.00523715	0.0374672	0.426112	0.178532	0.402864	0.224924	0.457579	0.658017	0.155971	0.422296	0.688196	0.521812	0.0307398	0.215136	0.0202151	0.909972	0.936819
Arhgef9	-0.56646	0.282577	0.955693	-1.03754	0.0532426	0.656001	-1.67468	0.000368723	0.0067894	-0.105351	0.810689	0.903642	0.18282	0.631313	0.794427	0.453408	0.0754641	0.275066	0.132433	0.709841	0.891783	0.147658	0.504904	0.601913
Arid1a	0.475405	0.15838	0.955693	0.16956	0.558282	0.980133	0.508276	0.0842419	0.208691	0.986726	0.0130271	0.146815	0.875171	0.0192551	0.0997227	0.369723	0.159701	0.418874	0.824131	0.00628958	0.0979251	-0.359121	0.150272	0.223637
Arid1b	0.481154	0.172588	0.955693	0.253854	0.411413	0.960673	0.543806	0.0792779	0.20199	0.964923	0.0153805	0.1557	0.990082	0.00784966	0.0547829	0.294992	0.275226	0.560085	0.587598	0.059391	0.296943	-0.591044	0.0207256	0.0420495
Arid2	-0.11537	0.673774	0.967962	0.0101596	0.957593	0.998323	-0.462988	0.0480476	0.147136	-0.31099	0.398647	0.62038	0.168278	0.619755	0.785815	0.0124018	0.960597	0.985582	0.33032	0.257632	0.591347	-0.450302	0.0651031	0.111255
Arid4a	-0.281511	0.377315	0.955693	-0.326038	0.255091	0.93973	-0.42423	0.155007	0.308799	0.638774	0.0972722	0.300086	0.493027	0.172956	0.367563	0.626329	0.0165681	0.111133	0.511163	0.0888452	0.361613	0.348123	0.144051	0.216217
Arid4b	-0.46915	0.191516	0.955693	0.0645963	0.824968	0.996172	-0.432772	0.198141	0.363368	0.0807859	0.851636	0.924845	-0.102512	0.80148	0.898344	0.138635	0.610248	0.815634	-0.0300575	0.926389	0.980524	-0.454052	0.0475998	0.0855939
Arid5b	-0.197503	0.548908	0.957503	-0.564471	0.0580439	0.676916	-0.486851	0.0805996	0.203848	0.356602	0.2833	0.513223	1.61854	8.82848e-08	1.08474e-05	1.23221	6.53147e-10	1.25354e-07	1.09823	1.59051e-05	0.00288605	-0.131161	0.469846	0.567464
Arih1	-0.264828	0.346084	0.955693	-0.0588128	0.820976	0.996172	-0.180103	0.471654	0.632896	-0.0840657	0.793176	0.893696	-0.556497	0.0792727	0.230385	-0.233511	0.226494	0.503655	-0.505095	0.0359023	0.231613	-0.214752	0.244372	0.335384
Arih2	-0.0478598	0.878927	0.987001	0.261671	0.281103	0.948861	0.159948	0.515589	0.670259	-0.303861	0.345263	0.572951	-0.478403	0.11158	0.283856	0.014601	0.942222	0.978499	-0.152046	0.52608	0.798279	0.34334	0.0530827	0.0939633
Arl1	0.236777	0.427861	0.955693	0.0575006	0.814827	0.996172	0.27981	0.277684	0.451128	-0.577425	0.105066	0.311706	-0.652041	0.0508269	0.176455	-0.451919	0.0760674	0.276659	-0.677606	0.0290014	0.209129	0.142389	0.465871	0.563631
Arl13b	0.173949	0.772261	0.974201	0.608893	0.341196	0.960134	0.1643	0.77839	0.860853	0.738448	0.0895458	0.290529	0.58983	0.124534	0.30447	0.722516	0.00751739	0.0683898	0.219749	0.49667	0.784635	1.1036	3.00746e-06	1.68526e-05
Arl15	0.128674	0.775108	0.974201	0.108648	0.798807	0.996172	-0.284224	0.541044	0.69093	-0.961665	0.114366	0.324425	-0.527166	0.274938	0.487887	-0.0604732	0.858198	0.942978	-0.326801	0.453931	0.756678	0.715871	0.00893735	0.0201707
Arl16	-0.189495	0.716693	0.972971	-0.255849	0.601655	0.986851	-0.1156	0.780822	0.862409	0.0446291	0.911231	0.958713	-0.194633	0.587525	0.76179	0.147674	0.5457	0.777568	0.0909962	0.754832	0.913404	0.243982	0.231954	0.321604
Arl2	0.610078	0.251965	0.955693	-0.284635	0.595243	0.986681	1.02202	0.0248991	0.0984522	0.161843	0.628134	0.792613	0.0545431	0.867819	0.9357	-0.275143	0.16634	0.42876	0.183232	0.495545	0.784135	0.301421	0.134471	0.203893
Arl2bp	-0.0737062	0.797195	0.978114	-0.186467	0.437645	0.965861	-0.139379	0.549515	0.698486	0.414286	0.240679	0.470812	0.384404	0.221434	0.42778	0.694738	0.000576	0.0118711	0.887018	0.00119736	0.0375776	0.638095	0.000274661	0.000961505
Arl3	-0.237809	0.444141	0.955693	0.109053	0.669315	0.990767	-0.543644	0.0451104	0.141454	-0.00819014	0.980522	0.992076	0.217081	0.468163	0.666454	0.157006	0.442285	0.703539	-0.126685	0.608753	0.84435	0.651761	0.00113123	0.00333618
Arl4a	0.10282	0.784348	0.976016	0.565397	0.103263	0.801369	0.314121	0.390033	0.562822	0.174483	0.716321	0.847325	-0.086683	0.853459	0.928312	-0.00601684	0.992079	1	-0.029147	0.947879	0.986529	0.0492081	0.859373	0.898977
Arl4c	0.435679	0.199528	0.955693	-0.120181	0.730254	0.9929	0.089171	0.764641	0.85302	-0.147391	0.657865	0.810402	0.33155	0.294487	0.509621	-0.960732	2.77212e-06	0.000179047	-0.000604047	0.99897	1	-1.03335	2.34108e-08	2.03165e-07
Arl5a	-0.0767974	0.776362	0.974201	0.101351	0.647681	0.989904	-0.492894	0.0335197	0.116967	-0.66449	0.141784	0.356361	-1.21023	0.00732516	0.0521063	-0.610066	0.030631	0.16226	-0.41824	0.225027	0.556221	-2.31271	6.05047e-24	3.92102e-22
Arl5b	-0.456332	0.3266	0.955693	-0.139867	0.74382	0.9929	-0.375201	0.313073	0.487589	0.111285	0.815312	0.905314	0.879159	0.0298457	0.128741	0.302908	0.289536	0.575519	-0.0389492	0.92049	0.97813	0.15717	0.551601	0.643104
Arl6	-0.971282	0.0509938	0.955693	-0.657429	0.149825	0.857166	-0.766565	0.0981314	0.229464	-0.13158	0.776272	0.883273	-0.107363	0.784533	0.88701	-0.0386347	0.897125	0.961068	-0.372694	0.258954	0.592975	0.37666	0.12286	0.189704
Arl6ip1	0.159887	0.690644	0.971177	0.0719409	0.835768	0.996172	0.407668	0.273199	0.446679	-1.65359	0.000390159	0.0312545	-1.36295	0.00114333	0.0145356	-1.26516	6.39139e-06	0.000352927	-1.32175	3.2428e-05	0.00446225	-1.30694	1.98408e-08	1.74152e-07
Arl6ip4	0.212101	0.509096	0.955693	0.199689	0.496984	0.973741	-0.0577213	0.854089	0.911594	0.54042	0.129459	0.343525	0.387187	0.25866	0.471503	-0.235682	0.252639	0.53407	0.0946609	0.74068	0.907072	0.147167	0.410503	0.509492
Arl6ip5	0.0938523	0.745217	0.974136	-0.217686	0.43648	0.965521	0.069422	0.784439	0.864286	-0.132978	0.674174	0.819021	-0.0881008	0.765758	0.877816	-0.223699	0.279197	0.564046	-0.310674	0.210822	0.543952	0.51092	0.00688644	0.0160802
Arl6ip6	-0.721512	0.0636464	0.955693	-0.65613	0.0526288	0.655602	-1.45548	1.95539e-05	0.000887037	0.867197	0.0531499	0.23224	0.52192	0.193139	0.395065	0.0596357	0.834142	0.932135	-0.0439773	0.903781	0.971828	-0.0181751	0.948248	0.964009
Arl8a	0.0796741	0.778034	0.974201	0.389679	0.13149	0.842902	0.503161	0.0446127	0.140276	0.223671	0.462062	0.673883	0.132814	0.645749	0.802462	0.10081	0.587998	0.801779	0.597727	0.00940961	0.123048	1.08832	2.69584e-08	2.31536e-07
Arl8b	-0.0183544	0.956445	0.998784	0.132663	0.562833	0.980133	-0.18688	0.445113	0.610364	0.125961	0.714619	0.846516	0.0413167	0.896492	0.949938	0.226746	0.329715	0.614483	-0.0222176	0.932986	0.982447	0.307325	0.126008	0.193709
Armc1	-0.516145	0.197416	0.955693	-0.329139	0.358137	0.960134	-0.698634	0.0376793	0.125808	-0.0192426	0.963553	0.985011	0.115483	0.74616	0.865591	-0.176212	0.48534	0.738593	-0.407901	0.170259	0.496735	-0.126219	0.584699	0.6732
Armc10	-0.0936289	0.772516	0.974201	-0.151311	0.591345	0.986681	-0.244541	0.3719	0.545765	-0.392251	0.289072	0.518407	-0.483971	0.214919	0.420821	-0.258744	0.295	0.579661	-0.651028	0.0340758	0.225996	-0.415074	0.0323459	0.061676
Armc2	0.0622608	0.928762	0.993687	0.525278	0.415791	0.960673	-0.0504558	0.916398	0.951091	-0.319957	0.568871	0.752008	0.3315	0.472962	0.670478	0.441591	0.185145	0.45567	0.690342	0.108885	0.400987	0.14654	0.633115	0.715976
Armc5	0.158955	0.727969	0.973017	-0.431922	0.406507	0.960673	0.746896	0.0894109	0.216846	0.600663	0.109297	0.317458	0.226646	0.521458	0.710853	0.695102	0.00278897	0.0356388	0.601058	0.0351655	0.229404	0.36697	0.0889518	0.144606
Armc6	0.419757	0.394208	0.955693	-0.530138	0.293578	0.949068	0.347143	0.415107	0.583804	0.263028	0.465676	0.676386	0.454839	0.181159	0.378631	-0.195484	0.395927	0.669493	-0.417506	0.14523	0.459978	0.0832874	0.680052	0.755515
Armc7	0.57542	0.180235	0.955693	0.822779	0.0446948	0.617804	0.91853	0.00864616	0.0509798	1.04811	0.0197573	0.169044	1.25606	0.00213461	0.0224009	0.928031	0.0002025	0.00559819	0.748337	0.018401	0.166596	0.998489	3.32912e-06	1.84889e-05
Armc8	-0.0402965	0.910985	0.991053	-0.0855636	0.777872	0.995877	-0.0996532	0.731111	0.830846	-0.879674	0.0332991	0.199768	-1.0439	0.00610142	0.0464471	-0.233607	0.306764	0.591793	-0.288705	0.286706	0.617596	0.0123661	0.945858	0.962445
Armc9	0.187724	0.671497	0.967922	0.646896	0.104495	0.805774	0.979295	0.00878541	0.051492	0.0753325	0.839686	0.916857	0.117328	0.7292	0.856267	0.185532	0.406319	0.676746	0.25774	0.337832	0.659292	-0.125311	0.519836	0.615059
Armcx1	-0.546931	0.189038	0.955693	-0.924144	0.01908	0.433819	-0.238942	0.51732	0.671897	0.780162	0.045735	0.221305	0.992718	0.00762223	0.0536081	0.336869	0.18634	0.45681	0.483984	0.105521	0.396649	0.785393	0.000585601	0.00186319
Armcx2	-0.0727806	0.794636	0.978114	-0.413984	0.0863045	0.750518	-0.431184	0.0722142	0.190845	0.848188	0.0117331	0.142618	0.563738	0.0810903	0.233222	0.332625	0.0758244	0.276077	0.621218	0.010308	0.127454	0.748545	2.04748e-05	9.39487e-05
Armcx3	-0.183426	0.568484	0.958723	-0.119146	0.68123	0.991186	-0.0666874	0.809474	0.879728	0.522606	0.160336	0.380431	0.546299	0.115943	0.291098	0.385667	0.119597	0.355655	0.379267	0.180084	0.509854	1.4861	2.6385e-11	3.74569e-10
Armcx5	0.129234	0.795169	0.978114	0.494235	0.3485	0.960134	0.826141	0.0845302	0.209022	-0.453359	0.371996	0.597349	-0.766714	0.086232	0.242695	0.572891	0.0922096	0.309328	0.391663	0.309604	0.638135	0.334172	0.272304	0.36571
Armcx6	-0.101158	0.86379	0.986037	-0.265215	0.61253	0.986881	0.686388	0.107488	0.243088	0.346788	0.378904	0.603103	-0.047883	0.900165	0.952105	0.217058	0.375508	0.653798	0.247274	0.399281	0.709928	0.974707	5.06878e-06	2.69651e-05
Arnt	0.224423	0.474733	0.955693	-0.234232	0.425909	0.962959	0.397869	0.138731	0.286653	0.201124	0.529258	0.722274	-0.137095	0.643451	0.800788	0.289217	0.151996	0.408434	0.260209	0.287755	0.618655	0.120731	0.533241	0.626604
Arnt2	0.431569	0.277817	0.955693	0.252371	0.49367	0.973297	1.30443	8.82728e-05	0.0025684	0.253796	0.456622	0.670456	0.0730814	0.822231	0.910549	0.319385	0.142767	0.394031	0.215227	0.413839	0.723441	0.127273	0.525842	0.620264
Arntl	0.131889	0.720922	0.973017	-1.05966	0.00885888	0.278024	-0.248178	0.519871	0.673369	-0.515503	0.158291	0.378185	0.228832	0.494625	0.687707	0.428564	0.0495061	0.216531	-0.280123	0.31059	0.638644	0.0116216	0.952332	0.966765
Arpc1a	-0.284338	0.357809	0.955693	-0.0602015	0.834246	0.996172	-0.281863	0.298556	0.472875	-0.572307	0.0739271	0.265202	-0.627428	0.0374988	0.149408	-0.541834	0.00513439	0.0528284	-0.465829	0.0451529	0.261418	-0.339282	0.0557582	0.0978662
Arpc1b	-0.554184	0.12359	0.955693	-0.240273	0.469397	0.967931	-0.680298	0.0290804	0.107711	0.827241	0.0435385	0.217911	0.710602	0.0572096	0.189622	-0.282782	0.210919	0.485017	-0.0495737	0.874374	0.962419	-0.110791	0.578684	0.667198
Arpc2	-0.139713	0.613924	0.962589	0.203163	0.369976	0.960134	-0.528134	0.0277772	0.105086	0.10863	0.732951	0.857609	-0.554872	0.0939853	0.255317	-0.201736	0.390975	0.665177	-0.223352	0.342727	0.664416	-0.0292346	0.867862	0.905611
Arpc3	-0.147752	0.595486	0.961274	0.137837	0.54551	0.979378	0.105654	0.655121	0.777684	-0.0853957	0.809898	0.903508	-0.130088	0.694631	0.834125	-0.111387	0.642272	0.833269	-0.205738	0.453294	0.756328	0.296822	0.219209	0.306574
Arpc4	0.215326	0.627599	0.962838	-0.0144159	1	1	0.750581	0.0746108	0.194264	0.37077	0.259565	0.488581	-0.20956	0.495738	0.688774	-0.444683	0.0198949	0.124871	0.426958	0.09117	0.36592	-0.494748	0.00516313	0.0124917
Arpc5	-0.161961	0.557049	0.957503	-0.193106	0.423744	0.962719	-0.362525	0.142454	0.291334	0.480346	0.177489	0.401481	0.436818	0.180764	0.378126	-0.637713	0.00106131	0.0185498	-0.371273	0.140281	0.453899	-0.710352	9.96489e-05	0.000392151
Arpc5l	0.373882	0.273385	0.955693	0.249145	0.404767	0.960134	0.28644	0.323915	0.498254	-0.0404934	0.908621	0.957049	-0.140773	0.662887	0.813128	-0.178022	0.401288	0.672519	-0.809034	0.00225203	0.0535125	1.07848	2.7975e-08	2.39033e-07
Arpp19	-0.0151078	0.974524	1	0.320947	0.191606	0.908424	-0.320123	0.262318	0.434898	-0.0590828	0.861166	0.931445	0.103365	0.746032	0.865543	-0.202918	0.375316	0.653798	-0.194945	0.468754	0.767416	0.241342	0.289432	0.38468
Arrb1	0.562898	0.23953	0.955693	0.433352	0.314212	0.955127	0.735322	0.0579501	0.16557	0.0519157	0.887945	0.945953	-0.454617	0.183636	0.382129	0.00693493	0.977218	0.993545	0.256477	0.334559	0.657465	-0.905851	7.82698e-06	3.97523e-05
Arrb2	0.530681	0.320069	0.955693	-0.0180059	1	1	1.06969	0.0337615	0.117457	0.15631	0.64634	0.803602	-0.0321203	0.922366	0.963081	0.281508	0.180008	0.448112	0.22088	0.390847	0.703475	0.414874	0.0346037	0.0653382
Arrdc1	0.760634	0.214619	0.955693	-0.259163	0.750328	0.9929	1.71052	0.00124929	0.0147936	0.340237	0.435946	0.653301	-0.0996615	0.799011	0.896877	0.135488	0.59886	0.808184	0.225392	0.478738	0.772861	0.036999	0.8776	0.912243
Arrdc2	0.389525	0.381497	0.955693	0.433192	0.313514	0.955127	0.318354	0.407946	0.578309	0.146853	0.7516	0.86857	0.457756	0.262984	0.475898	0.596513	0.0272762	0.152418	0.243871	0.472937	0.770017	0.119841	0.623787	0.707994
Arrdc3	-0.39086	0.298736	0.955693	-1.55924	2.53284e-05	0.00388889	-0.221331	0.475002	0.635957	-2.12374	0.00191191	0.0664839	0.0900648	0.894469	0.949112	0.703435	0.0136262	0.0991899	0.73458	0.0998869	0.385339	-1.70612	2.20307e-11	3.17726e-10
Arrdc4	-0.0541751	0.950568	0.998377	0.464491	0.323186	0.956525	0.505788	0.233044	0.403042	0.144086	0.742973	0.863454	0.729645	0.0889386	0.246832	1.07669	1.39765e-05	0.000660539	-0.296412	0.482264	0.776367	2.49909	3.61917e-35	6.12191e-33
Arsa	0.402235	0.351918	0.955693	-0.17949	0.675121	0.99077	0.410172	0.289509	0.464103	0.740221	0.0430982	0.217347	0.838285	0.0184565	0.0966907	-0.0190969	0.930567	0.974405	0.24025	0.379713	0.696095	0.138796	0.498639	0.595621
Arsb	-0.0764877	0.80696	0.979881	-0.208954	0.428969	0.963097	0.125611	0.617346	0.751036	0.00476281	0.988667	0.996715	0.294967	0.331199	0.546347	0.180229	0.379538	0.656547	0.430825	0.100837	0.387633	-0.374757	0.0316729	0.0606476
Arsg	-0.317529	0.597558	0.96167	-1.13391	0.0610695	0.68628	-1.08359	0.0420621	0.134977	-0.609428	0.188468	0.41568	-0.658777	0.107371	0.27736	-0.0458374	0.87914	0.952399	-0.304836	0.390123	0.703039	0.203827	0.44987	0.548328
Arsk	-0.643038	0.212562	0.955693	-0.248761	0.567143	0.980805	-0.601623	0.131232	0.276365	0.0099892	0.990539	0.997413	0.302144	0.440294	0.643829	-0.0517648	0.851058	0.940281	0.143359	0.675047	0.872099	0.392767	0.10508	0.166376
Arvcf	0.305821	0.544585	0.957503	0.533176	0.260155	0.944468	0.570509	0.216488	0.384713	1.10248	0.0129634	0.14663	1.41485	0.000466279	0.00774287	0.225307	0.409339	0.678603	0.136594	0.688909	0.880833	0.30947	0.152752	0.226855
Asah1	0.281529	0.332007	0.955693	0.0615312	0.801742	0.996172	0.199769	0.432882	0.599357	0.0686396	0.826654	0.910597	0.484044	0.0981875	0.262201	-0.00963447	0.963399	0.986799	-0.251769	0.3123	0.639406	0.589513	0.00166776	0.00470709
Asah2	-0.0171582	1	1	-0.000379751	0.970533	0.999167	0.617561	0.144392	0.293788	-0.520503	0.252604	0.482486	-0.593212	0.11736	0.293033	-0.142159	0.56988	0.792878	-0.269984	0.37656	0.693115	-1.04044	4.57348e-06	2.46188e-05
Asap1	-0.0765598	0.779909	0.974201	-0.326675	0.168165	0.880853	-0.717778	0.00204127	0.0204949	0.624565	0.05362	0.233082	0.447499	0.142032	0.328652	0.578965	0.00237796	0.0318551	0.499504	0.0336254	0.2255	-0.734775	2.87083e-05	0.000128077
Asb1	0.507504	0.299422	0.955693	0.100743	0.809096	0.996172	0.74793	0.0806774	0.203957	-0.0814254	0.83063	0.912861	0.606474	0.0675774	0.209708	-0.22761	0.325744	0.610731	-0.000841773	0.998711	1	-0.912564	6.60156e-06	3.40132e-05
Asb13	-0.230109	0.594009	0.961274	-0.383995	0.32295	0.956525	-0.533934	0.130902	0.275903	0.27259	0.476291	0.684433	-0.0372102	0.917515	0.960477	-0.170079	0.449154	0.709714	0.0430406	0.878864	0.963299	-0.124345	0.518245	0.613752
Asb3	-0.273343	0.492285	0.955693	-0.417986	0.256911	0.940561	-0.274631	0.413854	0.582794	-0.345212	0.507815	0.707524	0.0778249	0.867276	0.935417	0.0918167	0.809482	0.921061	-0.625173	0.154005	0.474374	0.436041	0.205494	0.290404
Asb4	-0.254252	0.63232	0.962838	-0.425802	0.353143	0.960134	-1.64698	0.00124531	0.0147936	-0.75407	0.0597045	0.243494	-0.424193	0.241679	0.452115	-0.604139	0.020607	0.12751	-0.700303	0.0220841	0.181398	-0.832568	0.000754111	0.00233438
Asb6	0.282129	0.592015	0.961016	0.0212802	0.93862	0.996908	1.46922	0.00241142	0.0226824	0.461717	0.204008	0.432062	0.210902	0.538785	0.724445	-0.0994277	0.620479	0.821581	0.0425123	0.881456	0.964073	0.270468	0.132369	0.201287
Asb7	-0.13203	0.74391	0.974136	-0.209826	0.563582	0.980133	0.156697	0.615145	0.74959	0.0665608	0.865427	0.933505	-0.00483428	0.990333	0.997117	0.38522	0.0929266	0.310266	0.413708	0.135087	0.446119	0.153297	0.432442	0.531826
Asb8	-0.32827	0.301071	0.955693	-0.535701	0.0670729	0.690813	-0.36899	0.181803	0.342855	-0.326274	0.362876	0.590109	-0.239044	0.464219	0.662981	-0.044019	0.835279	0.932135	-0.0911477	0.721526	0.896741	-0.222139	0.258822	0.351252
Ascc1	0.366661	0.384318	0.955693	-0.264375	0.551032	0.980133	0.158408	0.676437	0.794742	0.235665	0.500062	0.702189	0.55951	0.0861224	0.242523	0.128085	0.542836	0.775027	0.269152	0.307892	0.637717	0.778712	1.30826e-05	6.30138e-05
Ascc2	0.417771	0.355088	0.955693	0.416783	0.304224	0.955127	1.25157	0.00120983	0.0145471	0.762116	0.0247349	0.179139	0.935848	0.00447395	0.0375056	0.704543	0.000491901	0.010861	0.489793	0.0397693	0.244143	1.54179	1.86232e-18	6.98721e-17
Ascc3	-0.253203	0.348503	0.955693	-0.0078339	0.984339	1	-0.254533	0.322524	0.496803	-1.22695	0.0275288	0.186642	-1.19517	0.0232029	0.111238	-0.127839	0.607404	0.814243	-0.624099	0.0784694	0.340753	-0.207584	0.298092	0.393617
Asf1a	-0.819694	0.0880661	0.955693	-0.494379	0.261435	0.945037	-0.913471	0.0333095	0.116495	-1.04619	0.0702818	0.260942	-1.31387	0.00773288	0.0541573	-0.444347	0.29784	0.58275	-1.21317	0.0027239	0.0604726	0.701043	0.0107998	0.0238509
Asf1b	-0.0635927	0.831826	0.981006	0.0211767	0.924243	0.996527	0.487984	0.0483719	0.147857	-0.499596	0.115432	0.325359	-0.499186	0.0961571	0.259014	-0.484712	0.0166126	0.111195	-0.282335	0.238804	0.571289	-0.89354	8.83588e-07	5.62386e-06
Ash1l	0.0468911	0.847618	0.984087	0.328099	0.177461	0.888599	-0.132707	0.597599	0.737302	-0.170331	0.583966	0.762525	-0.172116	0.548246	0.731593	0.246354	0.197851	0.471188	0.12138	0.617094	0.846853	-1.01912	5.2379e-09	5.1099e-08
Ash2l	-0.125469	0.660366	0.967081	0.090662	0.695127	0.991213	-0.0829064	0.727711	0.8289	-0.215496	0.508242	0.707527	-0.906161	0.00370902	0.03305	0.108829	0.607103	0.814243	-0.0124098	0.961375	0.991938	0.398356	0.0386189	0.071799
Asl	0.302672	0.515841	0.956456	-0.43625	0.317545	0.955127	1.11775	0.00171376	0.0181564	0.389824	0.308042	0.537835	0.31515	0.386639	0.59945	-0.166466	0.444092	0.704775	-0.276048	0.314363	0.641071	0.0202693	0.913321	0.938717
Asna1	-0.153983	0.587217	0.96034	-0.0481414	0.855791	0.996527	-0.0773116	0.755202	0.846654	-0.0959761	0.760315	0.873482	-0.0721775	0.804842	0.900484	-0.299201	0.120733	0.357643	0.0675834	0.777643	0.922957	0.543377	0.00293907	0.00765647
Asns	0.414202	0.148791	0.955693	0.224405	0.379945	0.960134	0.0878667	0.729855	0.830459	-1.01048	0.0146699	0.153949	-0.420912	0.262404	0.475772	-0.173937	0.488681	0.740113	-0.843388	0.00429372	0.0797976	0.429087	0.0414414	0.076279
Asnsd1	-0.0333374	0.924433	0.992307	0.193959	0.432609	0.963408	-0.256948	0.328756	0.503462	0.233335	0.512161	0.710156	-0.781103	0.0320009	0.135097	0.00921007	0.970262	0.990407	-0.252306	0.384496	0.699084	0.182594	0.411054	0.510112
Asph	0.155302	0.54451	0.957503	0.209111	0.360972	0.960134	-0.0024556	0.999304	1	0.0543016	0.861409	0.931503	-0.46643	0.118803	0.295379	-0.170209	0.386773	0.660464	-0.267613	0.264696	0.59861	-0.218742	0.229988	0.319275
Aspm	-0.152856	0.648816	0.963232	-0.574171	0.050923	0.650099	-0.27858	0.376176	0.550071	-1.15348	0.00237644	0.0720366	-1.34428	0.000434491	0.00731827	-0.62344	0.00422745	0.0467219	-0.854797	0.00339712	0.0693318	-1.39179	3.70527e-12	6.04226e-11
Aspn	-0.985598	0.131059	0.955693	-1.39716	0.0378069	0.577041	-1.98205	0.00109607	0.0135982	-2.76982	4.00784e-05	0.00952339	-3.32571	1.13922e-09	2.77302e-07	-1.89334	0.000104633	0.0033802	-2.89698	2.31925e-07	0.000136154	-3.26493	7.42842e-13	1.35531e-11
Aspscr1	0.37481	0.413333	0.955693	-0.159687	0.744647	0.9929	1.05761	0.00857438	0.0508282	0.79363	0.0292324	0.190555	0.562812	0.107169	0.277149	0.253849	0.198548	0.472126	0.710551	0.0103486	0.127487	0.559161	0.00231714	0.00626866
Ass1	0.182794	0.767457	0.974201	0.443193	0.422026	0.962619	1.07288	0.0365071	0.123291	-0.446698	0.363862	0.590558	-0.0685683	0.87661	0.940686	-0.365865	0.209788	0.48353	0.215648	0.52921	0.799987	0.147419	0.554139	0.645377
Aste1	-0.400137	0.414026	0.955693	-0.371707	0.406811	0.960673	-0.311227	0.422862	0.590728	-0.319534	0.507121	0.707346	0.0869688	0.842766	0.921227	0.586886	0.033381	0.171634	0.12204	0.768998	0.919665	0.374133	0.129089	0.197381
Asxl1	0.142725	0.62514	0.962838	-0.167854	0.557532	0.980133	0.199077	0.451361	0.615582	-0.683065	0.0395728	0.211616	-0.856965	0.00662535	0.0489495	-0.282826	0.134824	0.38122	-0.116692	0.650573	0.86094	-0.783809	1.40699e-05	6.71535e-05
Asxl2	0.0738759	0.783858	0.976016	0.124788	0.620453	0.986881	0.303611	0.217838	0.385789	-0.276291	0.450944	0.665645	-0.28564	0.39608	0.606489	0.175225	0.431667	0.696192	-0.00204359	0.995141	1	-0.364962	0.0498298	0.0889468
Atad1	-0.320087	0.26907	0.955693	-0.18245	0.476964	0.970314	-0.479507	0.0651594	0.178626	-1.40575	0.0833212	0.281976	-1.64313	0.00936143	0.0615867	-0.447351	0.332947	0.617165	-1.28096	0.010617	0.128805	-0.869142	0.00371644	0.00939218
Atad2	-0.286042	0.369629	0.955693	-0.0719451	0.801362	0.996172	-0.166133	0.557885	0.704415	-0.408336	0.303143	0.533293	0.0992082	0.801803	0.898344	0.287622	0.302005	0.587069	-0.0525063	0.870661	0.962409	-0.780669	0.00185413	0.00516152
Atad2b	-0.129577	0.690705	0.971177	0.118671	0.652015	0.990305	-0.27597	0.339706	0.513833	0.324031	0.420147	0.638701	0.350678	0.348726	0.563335	0.561149	0.0335656	0.17214	0.345562	0.262647	0.59668	-0.355769	0.112205	0.175683
Atad3a	0.314501	0.423033	0.955693	-0.0440955	0.932245	0.996527	0.698567	0.0551223	0.160546	0.148131	0.639958	0.800147	-0.560314	0.0661007	0.206668	0.17296	0.371834	0.650465	0.0752628	0.764411	0.918084	0.648762	0.000164894	0.000612902
Atad5	-0.172032	0.556303	0.957503	0.387488	0.105259	0.807443	-0.0861798	0.723395	0.825178	-0.70523	0.14319	0.35747	-0.378703	0.411082	0.61954	0.149556	0.540203	0.773712	0.127483	0.727807	0.900153	-1.77328	1.26565e-16	3.72601e-15
Ate1	-0.185767	0.582091	0.96034	-0.255374	0.400989	0.960134	-0.0368792	0.912471	0.94838	0.301125	0.465305	0.676359	0.139282	0.718934	0.850114	0.250618	0.353129	0.635339	0.292326	0.377052	0.693636	-0.271594	0.264038	0.356962
Atf1	-0.0414974	0.882071	0.987001	-0.0575663	0.810736	0.996172	-0.0669622	0.773183	0.857145	-0.718284	0.0366802	0.204965	-0.672549	0.0629751	0.201265	-0.106839	0.573505	0.794879	-0.486496	0.0430899	0.253484	0.200914	0.252564	0.344296
Atf2	0.111253	0.662007	0.967608	0.00887388	0.958965	0.998816	0.186139	0.428235	0.59482	-0.88214	0.0801338	0.276917	-0.394651	0.319627	0.534318	-0.101453	0.671361	0.849892	-0.404476	0.274047	0.606922	-0.148933	0.426766	0.526134
Atf4	0.0375069	0.869184	0.986354	0.150222	0.489902	0.973297	-0.44929	0.0434504	0.138086	1.19087	0.0009654	0.0469829	1.64886	5.43834e-07	4.84595e-05	0.801395	2.32237e-05	0.000994734	0.945991	0.000223351	0.0146648	1.60052	9.71779e-19	3.74454e-17
Atf5	0.109132	0.737682	0.974136	-0.184336	0.562935	0.980133	-0.1513	0.676318	0.794736	1.2669	0.00870898	0.128634	0.812064	0.0685207	0.211322	-0.46721	0.181585	0.450464	0.328986	0.413082	0.722821	0.96721	0.0110995	0.024464
Atf6	0.0482622	0.846566	0.984012	0.126224	0.583063	0.982804	-0.414574	0.0904654	0.218384	-0.768914	0.0686139	0.257431	-0.625052	0.0802353	0.232034	0.481352	0.0150982	0.105088	-0.131273	0.656646	0.863376	1.10889	5.56478e-09	5.39713e-08
Atf6b	0.745082	0.223492	0.955693	-0.121067	0.873774	0.996527	1.68937	0.00325258	0.0275842	0.824599	0.0306069	0.193225	0.644098	0.0622447	0.199884	-0.0471867	0.804752	0.919447	0.344472	0.214352	0.545848	0.464574	0.00904258	0.0203713
Atf7	0.00669019	0.975638	1	-0.177617	0.557951	0.980133	-0.202102	0.49137	0.648982	-0.216972	0.58661	0.764209	-0.29054	0.450935	0.65279	0.254207	0.289989	0.575825	0.495642	0.159822	0.480718	0.169653	0.432716	0.532032
Atf7ip	0.09665	0.726652	0.973017	-0.163593	0.555382	0.980133	0.413257	0.0960301	0.226782	0.0723467	0.815081	0.905314	0.253715	0.386889	0.599722	0.190142	0.327141	0.611971	0.294996	0.222471	0.554574	-0.585684	0.00108824	0.00322656
Atf7ip2	-0.576061	0.353631	0.955693	0.83712	0.0844256	0.748059	-0.208677	0.665382	0.786046	-0.796335	0.145171	0.360684	-2.31366	1.40862e-05	0.000622037	-0.402	0.39682	0.670549	0.0265226	0.96011	0.991402	-1.86526	6.27479e-07	4.15268e-06
Atg10	-0.0736379	0.906395	0.991053	-0.446437	0.357108	0.960134	-0.874146	0.0611778	0.171697	-1.24812	0.0627331	0.249234	-0.914937	0.0607287	0.197033	-0.180271	0.634316	0.829492	-0.499411	0.244231	0.577883	0.481469	0.104123	0.165233
Atg12	-0.282584	0.340626	0.955693	-0.111093	0.677138	0.990842	-0.160541	0.529209	0.680908	-0.657181	0.108655	0.316515	-0.0861772	0.836347	0.917801	0.0611858	0.792888	0.915063	-0.550153	0.114142	0.410647	0.0125344	0.94972	0.965096
Atg16l1	0.0309943	0.922773	0.992307	-0.0449419	0.914912	0.996527	0.353856	0.26686	0.440209	0.084218	0.798264	0.897165	0.196157	0.529679	0.717356	0.028321	0.888365	0.956725	-0.0499096	0.84169	0.949605	0.0114815	0.950058	0.965243
Atg16l2	-0.256976	0.604969	0.96167	-1.09156	0.0180768	0.425909	0.0581672	0.882155	0.929588	1.17012	0.00270463	0.078323	1.13275	0.00179207	0.0198657	0.585183	0.0102779	0.0838074	0.280463	0.33723	0.659138	0.984242	1.96894e-07	1.44485e-06
Atg2a	0.564841	0.274041	0.955693	-0.250148	0.625099	0.986881	1.51986	0.000775695	0.010797	0.770427	0.0629983	0.249527	0.175216	0.641024	0.800269	-0.22397	0.407663	0.677451	0.302993	0.336278	0.658437	-0.7613	0.00240913	0.00648062
Atg2b	0.240345	0.39672	0.955693	0.264731	0.28415	0.948861	0.826927	0.000720956	0.0103676	-0.385069	0.254181	0.483495	-0.0640353	0.834364	0.916866	0.03053	0.873145	0.949753	-0.352306	0.165799	0.490389	-0.198585	0.245813	0.336841
Atg3	-0.50956	0.131019	0.955693	-0.481671	0.122387	0.830204	-1.12302	0.000245565	0.00514862	-0.548214	0.148622	0.365602	-0.175976	0.66023	0.810966	0.0455168	0.856288	0.942488	-0.409546	0.1855	0.515764	0.525332	0.013085	0.0282292
Atg4a	0.0582274	0.879424	0.987001	0.116298	0.784206	0.996172	0.577645	0.179628	0.340556	-1.20285	0.0712929	0.262257	-0.696276	0.174342	0.369333	-0.161172	0.673945	0.851882	-0.393177	0.321163	0.64794	-0.131101	0.641349	0.723402
Atg4b	0.565342	0.1863	0.955693	0.180018	0.640906	0.989904	0.639652	0.0917864	0.220222	-0.573523	0.100058	0.304723	-0.521768	0.0919429	0.251555	-0.275391	0.173698	0.439997	-0.26499	0.279319	0.610782	-0.0483033	0.79358	0.848048
Atg4c	0.468824	0.323968	0.955693	0.481364	0.277308	0.948712	0.737062	0.0740507	0.193462	0.136679	0.763731	0.875996	0.096327	0.80441	0.900102	0.319838	0.238896	0.519429	-0.112819	0.765902	0.918669	0.527051	0.0229286	0.0458664
Atg5	-0.438038	0.194794	0.955693	-0.276552	0.369476	0.960134	-0.267228	0.363861	0.537418	0.205373	0.604612	0.77658	0.494631	0.171803	0.366034	0.298114	0.245236	0.526787	0.331324	0.274901	0.606998	0.769162	0.000748427	0.00232038
Atg7	-0.0510003	0.92926	0.993687	-0.415096	0.364388	0.960134	0.405162	0.328287	0.503118	0.0108411	0.976299	0.989887	-0.330426	0.330202	0.545565	-0.109943	0.624969	0.823609	-0.0244556	0.929126	0.981442	-0.0500558	0.807711	0.859286
Atg9a	0.609245	0.32204	0.955693	-0.428616	0.509027	0.975024	0.955539	0.0877255	0.213797	0.444593	0.256205	0.48523	0.277244	0.444944	0.647135	-0.256821	0.331019	0.615191	0.353151	0.25612	0.589873	-0.224836	0.373045	0.472941
Athl1	0.772779	0.25702	0.955693	-0.305391	0.726304	0.9929	0.898735	0.134294	0.280036	-0.35675	0.334256	0.561785	-0.505638	0.13933	0.325335	0.0118292	0.961272	0.985892	0.174187	0.525976	0.798279	-0.620789	0.00387695	0.00974608
Atic	0.137842	0.593414	0.961274	0.27229	0.237593	0.938307	0.211546	0.379176	0.552779	-0.154985	0.664148	0.813043	-0.117961	0.699455	0.837329	0.111386	0.555905	0.785827	0.391967	0.0948759	0.374814	0.335738	0.0627502	0.107806
Atl1	-0.645598	0.241045	0.955693	-0.476819	0.357477	0.960134	-0.820442	0.0877789	0.213823	0.0573261	0.918137	0.962441	-0.617637	0.139555	0.325656	0.783377	0.0047195	0.0502013	0.195549	0.570875	0.824505	0.798246	0.00121045	0.00354989
Atl2	-0.045434	0.898365	0.989627	-0.178088	0.535994	0.979378	-0.48969	0.0796923	0.202632	-0.9589	0.022993	0.175916	-0.79722	0.0263618	0.120435	-0.336506	0.125709	0.366086	-0.541866	0.0477529	0.267825	-0.135188	0.476967	0.574989
Atl3	0.00760968	0.96406	0.998784	-0.0169439	0.950188	0.997148	-0.35091	0.119393	0.259651	-0.933628	0.0914677	0.292369	-0.577501	0.271069	0.483861	-0.217522	0.373718	0.652388	-0.265849	0.455012	0.757089	-0.685242	0.000362344	0.00123
Atm	-0.0578055	0.853641	0.984587	0.198247	0.411206	0.960673	-0.294259	0.267145	0.440607	-1.07785	0.0283664	0.188354	-0.626284	0.138186	0.323884	-0.146365	0.504023	0.75046	-0.339278	0.369668	0.686379	-1.78647	6.19804e-18	2.22505e-16
Atmin	-0.124448	0.765542	0.974201	0.115958	0.733109	0.9929	1.5044	7.68968e-07	6.91378e-05	0.376694	0.250761	0.480735	0.51777	0.0884998	0.246025	0.311547	0.113229	0.345546	0.235825	0.337508	0.659292	0.0729592	0.683205	0.758104
Atn1	0.596405	0.278391	0.955693	-0.0535425	0.942978	0.997148	0.876111	0.0811672	0.2043	1.41928	0.000366881	0.0310939	1.61541	2.38766e-05	0.000944044	0.565541	0.0206095	0.12751	1.10648	0.000107219	0.00914573	0.609539	0.00870704	0.0197267
Atoh8	0.189575	0.707134	0.972787	-1.10122	0.0616527	0.68756	-0.257213	0.629195	0.758966	1.94884	5.67702e-08	6.29518e-05	1.95673	5.04457e-08	6.80335e-06	1.03758	8.39609e-07	6.44562e-05	0.659103	0.0157669	0.154377	0.058925	0.760737	0.821662
Atox1	0.147401	0.699547	0.972227	-0.066872	0.864083	0.996527	0.90579	0.00901111	0.0524039	-0.0892991	0.784511	0.888256	0.0530724	0.872628	0.938653	-0.543317	0.00871611	0.0753132	-0.200103	0.467753	0.766279	-0.13041	0.509633	0.606359
Atp10a	-0.0584937	0.843592	0.98262	-0.114658	0.645244	0.989904	-0.0986521	0.699865	0.809685	0.344539	0.26422	0.493293	0.576699	0.0477144	0.1712	0.0729474	0.693693	0.862979	0.0180344	0.937358	0.983526	-0.647613	0.000183768	0.00067526
Atp10d	0.558703	0.181665	0.955693	0.814035	0.0305255	0.533529	0.633365	0.0736682	0.192867	-0.778516	0.0957322	0.298751	-0.0512459	0.896527	0.949938	-0.421046	0.0879124	0.301293	-0.264013	0.429095	0.736181	-1.62606	2.84522e-11	4.02199e-10
Atp11a	-0.0310762	0.933516	0.994867	-0.0957469	0.732602	0.9929	0.402091	0.117865	0.257569	-0.0548451	0.868254	0.935631	0.0256734	0.933939	0.968462	-0.34291	0.112349	0.344361	-0.177015	0.493428	0.782952	-0.941627	5.35916e-06	2.83286e-05
Atp11b	-0.434857	0.200566	0.955693	-0.350802	0.271659	0.948435	-0.864301	0.00572679	0.0394939	-0.289172	0.45402	0.668109	-1.28259	0.00235075	0.0238173	-0.146468	0.564924	0.790725	-0.581008	0.0437403	0.256329	-0.403158	0.0615637	0.106188
Atp11c	-0.577764	0.134912	0.955693	-0.160833	0.647549	0.989904	-1.12285	0.00143235	0.0161524	0.190506	0.661896	0.811974	-0.887485	0.0223581	0.108494	0.0575504	0.818482	0.924035	-0.0425173	0.899474	0.970927	-0.538261	0.0143539	0.0305507
Atp13a1	0.349016	0.436481	0.955693	0.069156	0.849519	0.996527	0.790345	0.053368	0.157594	0.125856	0.710957	0.843959	-0.0136904	0.966232	0.985956	-0.0763853	0.722671	0.876783	0.0908315	0.725592	0.899219	-0.0864495	0.661531	0.740309
Atp13a2	0.643609	0.283921	0.955693	-0.342551	0.600805	0.986681	1.22168	0.0205834	0.0868228	0.67664	0.097442	0.300307	0.44464	0.243008	0.453906	-0.257441	0.3437	0.625936	-0.234031	0.472242	0.770017	-0.491806	0.0452773	0.0819342
Atp13a3	0.0713946	0.775398	0.974201	0.331115	0.163772	0.874504	0.124623	0.595171	0.735306	-0.871306	0.0658223	0.253338	-0.430625	0.257609	0.470006	-0.213302	0.342343	0.624513	-0.23217	0.453592	0.756493	-0.624314	0.00162297	0.00459366
Atp1a1	0.119537	0.671934	0.967922	0.217691	0.387163	0.960134	0.531272	0.0602252	0.169637	0.27169	0.397284	0.618934	0.0175016	0.952013	0.97899	-0.219254	0.251042	0.532837	0.121909	0.614516	0.846495	-0.250294	0.156109	0.230708
Atp1a2	-0.500012	0.448072	0.955693	-0.871267	0.12089	0.828146	-1.20508	0.0174284	0.0784909	-1.44498	0.0614598	0.247256	-0.680835	0.250837	0.462555	-0.788918	0.117013	0.351214	0.141534	0.933411	0.982447	-0.828437	0.108108	0.170365
Atp1b1	-0.475475	0.191136	0.955693	-0.0241258	0.947159	0.997148	-0.586896	0.0661618	0.180606	-0.783783	0.0385394	0.209289	-1.15229	0.00190497	0.0205976	-0.324876	0.107173	0.335925	-0.645685	0.0120709	0.137364	-1.63561	6.77762e-18	2.40714e-16
Atp1b3	-0.242948	0.419256	0.955693	0.0373527	0.875125	0.996527	-0.377846	0.160844	0.317113	-0.28827	0.346529	0.574192	-1.52375	6.72234e-06	0.000354968	-0.851725	1.45249e-05	0.000671361	-0.631763	0.0100626	0.126494	-1.0873	1.50947e-09	1.63036e-08
Atp2a1	-1.68574	0.0885607	0.955693	-2.42966	0.0132013	0.363534	-2.69276	0.00236519	0.0224592	-0.941026	0.114295	0.324425	-0.993701	0.0604334	0.19636	0.549397	0.193856	0.467427	-0.0434283	0.921224	0.978372	-0.183936	0.639403	0.721696
Atp2a2	0.146531	0.55662	0.957503	0.422184	0.0545208	0.665181	0.400911	0.0903116	0.218235	-0.531078	0.145177	0.360684	0.00120797	0.997438	1	-0.0243812	0.897299	0.961151	-0.268002	0.303044	0.632186	1.63354	2.94223e-19	1.21337e-17
Atp2b1	-0.0650028	0.817296	0.981006	-0.0328593	0.899171	0.996527	-0.63221	0.00680018	0.0436717	-0.254358	0.505494	0.706169	-0.0087755	0.9812	0.992639	0.450987	0.0274698	0.152992	0.155611	0.547927	0.811202	0.0162151	0.932643	0.952397
Atp2c1	-0.318756	0.312152	0.955693	-0.0134442	0.972312	0.999189	-0.998476	0.00113245	0.0138334	-0.906674	0.0348834	0.202458	-0.188142	0.692323	0.833354	-0.652261	0.00881983	0.0759464	-1.06606	0.00052084	0.0232859	-1.14978	3.43144e-08	2.88507e-07
Atp5a1	-0.157399	0.552612	0.957503	-0.0748176	0.758515	0.993133	-0.37426	0.103463	0.237262	-0.435805	0.181973	0.40725	-0.364403	0.214162	0.419745	-0.204567	0.31035	0.595389	-0.417128	0.0837086	0.350424	-0.227503	0.218205	0.305469
Atp5b	0.149652	0.549778	0.957503	0.195532	0.372376	0.960134	0.0642695	0.767627	0.85425	-0.200336	0.554984	0.741572	-0.151586	0.641595	0.800318	-0.424723	0.0498944	0.217607	-0.283416	0.294259	0.624433	-0.157008	0.447497	0.546102
Atp5c1	0.18035	0.518283	0.956934	0.299864	0.246859	0.93973	0.115914	0.644635	0.770382	-0.685595	0.0637982	0.250179	-0.353316	0.35254	0.567076	-0.060739	0.747974	0.891276	-0.279132	0.248965	0.583119	0.299666	0.0956553	0.153603
Atp5d	0.165771	0.575881	0.959708	0.408587	0.141569	0.852031	0.519679	0.0575246	0.164872	0.394678	0.264654	0.493419	0.0393367	0.905305	0.955169	-0.414252	0.0409432	0.19289	-0.234462	0.407377	0.717548	0.432442	0.0474905	0.0854127
Atp5e	0.127491	0.664422	0.967797	0.0292781	0.902625	0.996527	0.0117152	0.959704	0.976734	-0.37427	0.256659	0.485597	-0.82252	0.00912177	0.0606497	-0.750817	0.000314535	0.00775077	-0.723864	0.0084758	0.115716	0.330264	0.124612	0.191828
Atp5f1	-0.207212	0.53796	0.957503	-0.115755	0.702853	0.992528	-0.905716	0.00295699	0.025955	-0.625136	0.0517609	0.230152	-0.965147	0.00169165	0.0191848	-0.61167	0.00301643	0.0373499	-0.966426	9.36129e-05	0.00834158	-0.108678	0.534067	0.627205
Atp5g2	0.372769	0.290411	0.955693	-0.0406414	0.919567	0.996527	0.552767	0.0760309	0.196781	0.183782	0.569918	0.752651	0.57068	0.091865	0.251555	-0.0784054	0.694429	0.863172	-0.172053	0.502357	0.787327	0.832363	0.000100406	0.000394571
Atp5g3	-0.152794	0.562347	0.957503	-0.13223	0.57321	0.981301	-0.0829913	0.730205	0.830607	1.14861	0.00597674	0.110459	-0.605488	0.0627315	0.200835	-0.409046	0.0365527	0.180771	0.306201	0.327117	0.652926	0.112768	0.625521	0.709478
Atp5h	-0.09919	0.710791	0.972787	0.0380161	0.857817	0.996527	0.0791203	0.738166	0.836171	-0.651384	0.172606	0.396093	-0.314642	0.476376	0.673023	0.125218	0.678601	0.854351	0.119133	0.716087	0.8944	0.516575	0.0715613	0.12068
Atp5j2	0.0494212	0.84707	0.984087	0.153741	0.508547	0.975024	-0.109945	0.664348	0.785365	-0.662433	0.0426577	0.216874	-0.933043	0.0018993	0.0205586	-0.654608	0.000553018	0.0116192	-0.629362	0.00831796	0.11474	-0.0687927	0.711482	0.782607
Atp5k	-0.321613	0.37607	0.955693	0.0793974	0.775666	0.995877	-0.668028	0.0411764	0.133206	-0.308775	0.443991	0.660658	-1.2511	0.000513075	0.00827089	-0.566485	0.0395082	0.18879	-0.712432	0.0221614	0.181585	-0.127982	0.653424	0.734268
Atp5l	0.779665	0.324611	0.955693	-1.67007	0.0185366	0.430223	1.51414	0.0193448	0.0835258	-1.2836	0.0165737	0.158162	-1.97868	8.3823e-06	0.000410075	-1.35469	3.82942e-05	0.00153028	-0.883079	0.0192125	0.168987	-0.910545	0.00456162	0.0112296
Atp5o	0.23089	0.372073	0.955693	0.298734	0.196066	0.912657	0.37066	0.109852	0.246641	0.204474	0.534997	0.726629	0.214048	0.4934	0.686577	-0.322477	0.101769	0.326342	0.00156036	0.995343	1	0.190738	0.300115	0.395922
Atp5s	-0.498655	0.432487	0.955693	-0.589798	0.322149	0.956007	-0.553151	0.312236	0.486588	-0.510444	0.304296	0.534307	-1.12765	0.00846306	0.0578981	0.297658	0.31855	0.603875	0.201944	0.589725	0.832456	1.50282	1.5662e-09	1.68434e-08
Atp5sl	0.144613	0.825583	0.981006	-0.218018	0.787177	0.996172	0.892822	0.152441	0.305435	0.335306	0.383632	0.607432	0.239844	0.507277	0.698871	0.175986	0.437309	0.700875	0.529242	0.0592863	0.296943	0.760835	0.000192797	0.00070403
Atp6ap1	0.244428	0.431539	0.955693	0.160306	0.569946	0.981301	0.567881	0.0440269	0.13928	-0.747407	0.0253618	0.180794	-0.450926	0.134176	0.317783	-0.578139	0.00524038	0.0536399	-0.6771	0.00636848	0.0988451	-0.434989	0.0158697	0.0333712
Atp6ap2	-0.396216	0.204972	0.955693	-0.233475	0.417019	0.960796	-0.169494	0.551826	0.70061	-0.996242	0.0208038	0.171589	-0.712202	0.038938	0.152572	-0.575197	0.0132035	0.0972477	-0.918573	0.000834341	0.0307259	-0.171761	0.375138	0.47493
Atp6v0a1	0.146329	0.665229	0.967797	-0.138468	0.674172	0.99077	0.451129	0.13527	0.281602	0.354265	0.263122	0.492398	0.539924	0.0706055	0.214966	0.587739	0.00386337	0.044509	0.664998	0.00761275	0.109003	0.2235	0.241918	0.332646
Atp6v0a2	0.429085	0.35416	0.955693	0.0548052	0.879786	0.996527	1.13798	0.00572524	0.0394939	0.619312	0.0609825	0.246798	0.883864	0.00507912	0.0411442	0.332167	0.0881032	0.301687	0.343093	0.156928	0.476611	0.37652	0.031796	0.0608484
Atp6v0b	0.168441	0.619972	0.962615	-0.436432	0.142355	0.854304	0.604193	0.0273815	0.104181	0.11419	0.768837	0.878985	0.0429302	0.904677	0.95493	-0.414592	0.108849	0.338806	-0.151335	0.6513	0.861038	0.534849	0.0463716	0.083702
Atp6v0c	0.800538	0.149394	0.955693	0.0529621	0.891459	0.996527	1.4785	0.00222256	0.0216343	0.0645509	0.860507	0.930934	0.259081	0.446618	0.648232	-0.472789	0.0787387	0.282279	0.0374554	0.900083	0.971167	0.253004	0.348507	0.446827
Atp6v0d1	0.27557	0.443075	0.955693	0.161569	0.615705	0.986881	0.387726	0.221296	0.389444	-0.168316	0.609161	0.779513	0.44838	0.123557	0.302972	-0.0566813	0.781747	0.908604	-0.454922	0.0639034	0.306319	0.654242	0.000166413	0.000617858
Atp6v0e	-0.0259359	0.947908	0.997692	-0.163202	0.5863	0.984732	0.359022	0.20206	0.367785	-0.627368	0.0832727	0.281976	-0.3535	0.297327	0.512475	-0.248548	0.212763	0.487348	-0.210462	0.391	0.703475	0.340983	0.0631434	0.108389
Atp6v1a	0.082327	0.787369	0.976748	-0.0122252	0.974934	0.999265	1.13876	3.23551e-06	0.000212437	-0.233953	0.485434	0.691793	0.338909	0.255382	0.467481	-0.410835	0.0319656	0.166068	-0.347402	0.141512	0.45499	-0.704809	0.000363083	0.00123209
Atp6v1b2	0.282706	0.328236	0.955693	0.100229	0.697337	0.991213	0.246617	0.337252	0.511905	-0.632807	0.0663134	0.25428	-0.093099	0.76169	0.875465	-0.304744	0.108166	0.337606	-0.643053	0.00862578	0.117018	-0.234564	0.192649	0.275095
Atp6v1c1	-0.414033	0.228206	0.955693	-0.0702179	0.820044	0.996172	-0.423276	0.176249	0.336645	-0.616338	0.0713616	0.262413	0.189317	0.531741	0.71927	-0.202528	0.378277	0.655987	-0.310577	0.297467	0.627769	0.300729	0.110475	0.173355
Atp6v1d	0.0596055	0.82107	0.981006	0.137899	0.586671	0.984777	0.432208	0.10138	0.234131	-0.72449	0.063334	0.249527	-0.118147	0.73194	0.857475	-0.369526	0.194883	0.468385	-0.865407	0.0100454	0.126494	-0.18212	0.391669	0.491062
Atp6v1e1	-0.365113	0.316826	0.955693	-0.0839072	0.803553	0.996172	-0.144499	0.648801	0.773138	-0.796018	0.0196092	0.169044	-0.355951	0.267083	0.479268	-0.482633	0.0114604	0.0897761	-0.531716	0.0429393	0.253121	-0.057392	0.741354	0.806488
Atp6v1f	0.270971	0.377777	0.955693	0.239557	0.389537	0.960134	0.415635	0.124519	0.267132	0.58806	0.0942816	0.29661	0.453665	0.168041	0.361954	-0.121346	0.563323	0.790615	0.0691837	0.800281	0.934348	0.85356	5.2277e-05	0.000220044
Atp6v1g1	-0.314809	0.309004	0.955693	-0.207344	0.448928	0.966629	-0.548582	0.0548134	0.160046	0.810734	0.0375343	0.207186	1.10308	0.00247672	0.0245703	0.327881	0.207916	0.48155	0.236499	0.432487	0.739522	1.20953	1.6566e-06	9.94157e-06
Atp6v1h	-0.175186	0.554342	0.957503	-0.0178828	0.953666	0.997921	0.834298	0.000643142	0.00963747	-1.09483	0.0177245	0.161692	-0.553547	0.164396	0.358226	-0.474521	0.155459	0.413631	-0.995518	0.0107542	0.128805	0.288405	0.105174	0.166477
Atp7a	0.340443	0.307594	0.955693	0.413112	0.178767	0.890462	0.244606	0.40482	0.575279	-0.864842	0.107723	0.31567	0.199153	0.653641	0.807163	-0.0516561	0.848229	0.939131	-0.398214	0.322838	0.649617	-0.769247	0.0010313	0.00308063
Atp8b2	0.462494	0.228582	0.955693	-0.373966	0.296337	0.949726	0.435722	0.215362	0.383396	-0.183324	0.560264	0.745027	-0.474107	0.105703	0.274931	-0.674924	0.000514809	0.0110968	-0.170695	0.472838	0.770017	-0.719738	0.000109256	0.000424767
Atp8b4	-0.0178909	0.99916	1	-0.462258	0.346693	0.960134	-0.0280026	0.95208	0.972146	-0.547469	0.403635	0.623283	-0.448689	0.443142	0.645944	0.894067	0.00847192	0.0740366	0.383971	0.378447	0.695049	-1.27006	0.000437651	0.00144484
Atp9b	-0.19569	0.550398	0.957503	-0.222868	0.446895	0.966629	0.207179	0.449458	0.61388	-0.0729745	0.822057	0.907536	-0.337843	0.274571	0.487583	0.0934903	0.652884	0.838997	-0.235001	0.352976	0.674073	0.0942432	0.609175	0.695125
Atpaf1	0.132526	0.699599	0.972227	0.0147014	0.955464	0.998173	0.264246	0.377058	0.551004	-0.439831	0.259821	0.488694	-0.776204	0.0446169	0.165039	-0.373412	0.196938	0.470759	-0.708892	0.0187931	0.167373	-0.288376	0.139072	0.209785
Atpaf2	0.270379	0.413511	0.955693	0.0760702	0.798885	0.996172	0.427271	0.137945	0.285738	-0.477454	0.185643	0.412414	-0.732044	0.0251919	0.116799	0.158848	0.452242	0.712113	0.00131786	0.99687	1	0.885682	5.33212e-06	2.82156e-05
Atpbd3	0.542126	0.385895	0.955693	0.0987038	0.835606	0.996172	0.625125	0.260416	0.433086	0.575624	0.125846	0.338986	0.324137	0.341114	0.555774	0.181439	0.414308	0.682723	0.0295322	0.918606	0.977405	0.534082	0.00563033	0.0134847
Atpbd4	-0.389863	0.238547	0.955693	-0.210674	0.488204	0.972899	-0.627048	0.0411256	0.133085	0.153944	0.655428	0.80885	-0.662911	0.0390809	0.152832	-0.224268	0.282987	0.568389	-0.697107	0.00677623	0.10199	0.345895	0.061765	0.106499
Atpif1	-0.131171	0.675645	0.967987	0.232423	0.341696	0.960134	-0.441522	0.124829	0.267585	0.345225	0.314633	0.544614	0.110314	0.732072	0.857475	-0.0339106	0.897119	0.961068	0.0911681	0.743352	0.908794	0.417079	0.0858344	0.1405
Atr	-0.0313564	0.936983	0.995061	-0.134776	0.642932	0.989904	-0.440557	0.109619	0.246507	-1.70657	0.00583142	0.109394	-1.60701	0.00164822	0.0189462	-0.264353	0.354209	0.636251	-0.761864	0.0366008	0.234096	-1.08689	5.09936e-07	3.45966e-06
Atrip	0.451164	0.299328	0.955693	0.261018	0.515949	0.975222	0.662727	0.0949289	0.225192	-0.124118	0.752507	0.869416	-0.197554	0.592377	0.764802	-0.0929367	0.691984	0.862495	-0.461977	0.119629	0.419943	0.233962	0.24014	0.330657
Atrn	-0.252511	0.40202	0.955693	-0.139117	0.608614	0.986881	-0.347376	0.179286	0.340425	-0.45787	0.172512	0.39606	-0.420374	0.201921	0.404169	-0.0763956	0.703517	0.867552	-0.25073	0.32279	0.649617	-0.640083	0.00103403	0.00308678
Atrnl1	-0.25345	0.398903	0.955693	-0.134291	0.625154	0.986881	-0.375362	0.150441	0.30264	-0.348197	0.27713	0.506871	-0.236083	0.428575	0.634784	-0.226876	0.260593	0.543288	-0.349557	0.150297	0.468301	-0.667563	0.000427719	0.00141674
Atrx	-0.511773	0.14784	0.955693	-0.187803	0.565347	0.980133	-0.713175	0.0303851	0.110162	-0.375316	0.323279	0.552452	-0.0467669	0.897878	0.95075	0.327738	0.166697	0.429105	0.34866	0.294007	0.624328	-0.678858	0.000772746	0.00238467
Atxn1	0.126807	0.727547	0.973017	0.00259048	0.970001	0.998839	-0.366756	0.304514	0.479196	1.78606	0.000434039	0.0325693	1.89941	7.25551e-05	0.00209622	0.32492	0.38838	0.662004	0.90575	0.0266148	0.200323	0.26686	0.439931	0.539276
Atxn10	0.240283	0.382021	0.955693	0.204584	0.411087	0.960673	0.147418	0.547787	0.697222	-0.587161	0.0948146	0.297189	-0.636812	0.0527279	0.180275	-0.446742	0.0981312	0.319735	-0.785191	0.0143631	0.148851	-0.220113	0.279666	0.373887
Atxn1l	0.129432	0.684254	0.970421	-0.132921	0.674255	0.99077	0.355512	0.216697	0.384869	0.0239597	0.939391	0.973229	-0.157325	0.594846	0.766799	0.0356358	0.857325	0.942812	0.137161	0.593226	0.834843	-0.830228	5.7569e-06	3.0223e-05
Atxn2	-0.00418156	0.998325	1	-0.100205	0.67564	0.99077	-0.0968043	0.676874	0.79501	0.38252	0.267573	0.495989	0.479439	0.13965	0.325688	0.295619	0.199309	0.47332	0.482902	0.0733916	0.330939	0.180222	0.413907	0.512696
Atxn2l	0.210672	0.502668	0.955693	-0.0494881	0.877202	0.996527	0.594873	0.0343157	0.118502	0.841935	0.031383	0.19512	0.946761	0.00917302	0.0608284	0.780025	0.00158133	0.0240942	0.904469	0.00237771	0.0558343	1.54986	4.47861e-10	5.22767e-09
Atxn3	-0.0502277	0.899917	0.989627	-0.136039	0.666008	0.990689	-0.231342	0.451854	0.616053	-0.611461	0.225627	0.454624	-0.156054	0.718124	0.849558	0.568975	0.0287402	0.156394	0.132469	0.693316	0.883168	0.176498	0.451856	0.550009
Atxn7	-0.13473	0.725107	0.973017	0.133207	0.681806	0.991213	0.703401	0.0173963	0.0784167	0.308117	0.389221	0.612361	0.314595	0.342559	0.557143	0.444103	0.0382315	0.185165	0.58312	0.026616	0.200323	-0.164759	0.390758	0.490352
Atxn7l1	-0.230369	0.701734	0.97268	-0.805317	0.143762	0.854848	0.112298	0.808639	0.879204	-0.512462	0.332055	0.559981	1.06034	0.0391473	0.15301	-0.320345	0.493093	0.743027	-0.78166	0.110218	0.402389	-0.011624	0.979502	0.986222
Atxn7l2	0.180855	0.72378	0.973017	0.127923	0.775222	0.995877	0.999456	0.0274631	0.104293	0.757392	0.0720189	0.263139	0.299652	0.431254	0.637399	0.284698	0.22949	0.50783	0.609162	0.0484945	0.268525	0.472501	0.0262683	0.0515348
Atxn7l3	0.307111	0.48543	0.955693	-0.281239	0.528262	0.97863	0.698872	0.0782112	0.200346	0.571074	0.106742	0.313965	0.0551506	0.864334	0.934008	-0.179405	0.385117	0.660276	0.431846	0.120254	0.421249	-0.0370059	0.845143	0.887191
AU019823	0.121464	0.731869	0.973401	0.272872	0.425259	0.962959	0.120727	0.716667	0.820881	-0.318877	0.482098	0.689205	-0.122717	0.755554	0.872028	0.130602	0.644467	0.834029	0.0749114	0.822941	0.942159	0.0658654	0.792649	0.847326
AU022870	-0.0622322	0.819988	0.981006	0.0257271	0.899187	0.996527	-0.237624	0.31123	0.48578	-0.737159	0.0714531	0.262653	-0.814234	0.0633568	0.201884	-0.0110743	0.96501	0.987774	-0.110133	0.697892	0.885226	0.241158	0.269805	0.363087
AU040320	0.506022	0.306404	0.955693	-0.340644	0.495651	0.973406	0.0573885	0.880156	0.928702	0.33065	0.306605	0.536734	0.589197	0.0616823	0.198851	0.496333	0.017808	0.116159	0.319966	0.19184	0.524106	0.65217	0.000520731	0.00168402
AU040829	0.427656	0.396024	0.955693	-0.519346	0.348138	0.960134	1.15349	0.0052147	0.0373926	0.326544	0.475458	0.683728	0.612287	0.139562	0.325656	-0.284422	0.306588	0.591793	0.250025	0.449453	0.752807	-0.70726	0.00404057	0.0100989
AU041133	-0.44536	0.347264	0.955693	-0.534668	0.225663	0.931834	-0.377241	0.349677	0.523598	-0.00702283	1	1	-0.0803153	0.870926	0.93812	1.08144	0.00039986	0.00929047	0.0603715	0.922135	0.978411	0.651396	0.0367434	0.0687605
Auh	-0.46587	0.31365	0.955693	-0.513713	0.239235	0.939246	-0.3473	0.386463	0.559702	0.774235	0.0753363	0.267564	0.085362	0.830665	0.915026	0.319913	0.218518	0.493841	0.528194	0.115488	0.413074	0.664883	0.00241069	0.00648307
Aup1	0.570713	0.308543	0.955693	-0.622706	0.254115	0.93973	1.13184	0.0260088	0.101138	0.443108	0.173598	0.397182	0.394968	0.187104	0.386844	0.383682	0.0408635	0.192822	0.656537	0.00669914	0.1019	1.04899	5.33824e-09	5.19762e-08
Aurka	0.444339	0.206439	0.955693	-0.201882	0.513959	0.975024	0.706983	0.0122362	0.0636026	-0.46637	0.132193	0.345273	-0.372354	0.19696	0.399201	-0.404036	0.0357504	0.178931	-0.276641	0.239075	0.571289	0.180699	0.308075	0.405019
Aurkb	-0.378265	0.197427	0.955693	-0.484855	0.0777547	0.726796	-0.35943	0.175588	0.336079	-0.305104	0.321323	0.551032	-0.710898	0.0128376	0.0761253	-0.533517	0.00417089	0.046561	-0.340173	0.148851	0.466482	0.115133	0.507132	0.604103
AV249152	0.26949	0.603664	0.96167	-0.358928	0.571422	0.981301	0.784613	0.083996	0.208268	-0.60413	0.218922	0.448081	-0.754721	0.0747944	0.222823	-0.0467257	0.867934	0.947494	-0.218841	0.527964	0.79923	0.805587	0.000696211	0.00217675
Aven	0.449496	0.385856	0.955693	0.47281	0.34013	0.960134	0.637817	0.173323	0.333096	-0.439339	0.287777	0.517108	-0.197588	0.591658	0.764368	-0.183445	0.459831	0.717562	-0.217187	0.460698	0.762102	0.340313	0.113503	0.177381
Avl9	-0.0383502	0.911758	0.991053	0.14202	0.571402	0.981301	0.306381	0.21742	0.385409	0.0311136	0.933879	0.970308	-0.0381586	0.911621	0.957682	0.327904	0.130555	0.373977	-0.136172	0.621384	0.849858	-0.426776	0.0307535	0.0590913
Avpi1	0.182559	0.529951	0.957503	-0.457439	0.113685	0.819329	-0.577421	0.0359657	0.122117	1.4466	0.000884819	0.0457539	1.28991	0.000498913	0.00814211	0.247041	0.227213	0.504468	0.63786	0.032216	0.221389	1.18081	9.10137e-09	8.49688e-08
AW146020	0.137955	0.720366	0.973017	0.1878	0.601923	0.986881	0.230668	0.49777	0.654425	-0.255723	0.617238	0.7851	-0.394164	0.403891	0.613708	0.111884	0.755568	0.895449	-0.289256	0.484507	0.777517	0.10794	0.745255	0.809055
AW146154	-0.790185	0.0841283	0.955693	-0.476082	0.259353	0.943304	-0.1539	0.698647	0.80878	-1.44327	0.0354742	0.203633	-0.647941	0.240942	0.451483	-0.0512919	0.860371	0.94365	-0.33285	0.379913	0.696317	-0.446357	0.0719422	0.12124
AW146242	0.0129773	0.953856	0.998784	0.549703	0.064426	0.68792	0.387461	0.197069	0.362135	0.360047	0.316236	0.546405	-0.303166	0.363875	0.578168	0.51602	0.0115931	0.090135	0.622159	0.0118051	0.135419	0.496811	0.00761455	0.017591
AW209491	-0.207551	0.591126	0.96034	-0.785055	0.0322868	0.544294	-0.376097	0.248826	0.421032	-1.45641	0.0280892	0.187864	-0.575784	0.282207	0.496537	0.545623	0.0197796	0.124737	-0.570541	0.0740118	0.331475	0.799045	5.20097e-05	0.000219196
AW549877	-0.509513	0.119961	0.955693	-0.935419	0.0027235	0.130051	-0.778213	0.0146207	0.0705391	0.213173	0.640302	0.800377	-0.148645	0.710387	0.844504	0.471905	0.108584	0.338331	-0.163273	0.635684	0.855596	0.0193804	0.944769	0.961926
AW551984	0.00442355	0.982135	1	-0.485234	0.252805	0.93973	-0.457331	0.227982	0.397287	-1.19541	0.087375	0.288265	-0.595726	0.33244	0.547302	-0.0492653	0.852876	0.941352	-0.604768	0.193283	0.525318	-1.51221	5.74161e-11	7.67085e-10
AW554918	-0.0542976	0.948413	0.997743	-0.251272	0.617401	0.986881	0.162533	0.683628	0.798611	-0.72916	0.221337	0.450712	-0.783675	0.126283	0.306972	0.569259	0.0586835	0.239829	0.52623	0.159054	0.479854	-0.290651	0.269382	0.362664
AW555464	0.289723	0.481833	0.955693	0.681201	0.0533609	0.656649	1.2037	0.000842557	0.0113785	0.944023	0.0202209	0.170156	0.445488	0.201406	0.404066	-0.240853	0.317653	0.60304	0.276812	0.341974	0.663374	-0.688506	0.00127154	0.00370293
Axin1	-0.130487	0.651225	0.964426	0.133464	0.583086	0.982804	0.0662451	0.790049	0.86768	0.476986	0.142979	0.357358	0.232844	0.461166	0.660849	0.264438	0.187083	0.457844	0.343716	0.158559	0.479161	0.0897377	0.608645	0.694611
Axl	0.233193	0.484928	0.955693	-0.103091	0.7475	0.9929	-0.157075	0.640902	0.767622	0.56946	0.116375	0.325967	0.507471	0.140882	0.326845	-0.238679	0.295622	0.580259	0.267378	0.325176	0.651136	-0.603806	0.00559107	0.0134067
AY074887	0.919617	0.215062	0.955693	-0.122872	0.93934	0.996961	2.51395	5.99664e-05	0.0019494	-1.22066	0.0850201	0.284844	-2.15169	0.000273473	0.00536786	-0.405386	0.281717	0.567274	-0.738287	0.0798734	0.342469	0.507541	0.0792362	0.131293
Azi1	-0.0841329	0.854159	0.984587	-0.8315	0.0409393	0.598135	0.356658	0.296347	0.470497	1.32667	0.00124241	0.0539099	0.69092	0.0542047	0.183377	0.563595	0.0187216	0.120363	0.646252	0.0290381	0.209242	0.740943	0.000145617	0.000547159
Azi2	-0.217323	0.509445	0.955693	-0.292144	0.32995	0.958406	-0.0880633	0.758462	0.848689	0.488875	0.21839	0.447818	0.450392	0.204928	0.408053	0.253111	0.292621	0.578106	0.132025	0.662672	0.865751	0.325337	0.0976234	0.156235
Azin1	-0.359425	0.255027	0.955693	-0.389065	0.167446	0.880634	-0.804813	0.00428012	0.0330105	0.269914	0.446447	0.662212	-0.164156	0.62471	0.788791	0.777172	0.00516555	0.0530918	0.520908	0.0665803	0.313251	0.647163	0.00623071	0.0147247
B230118H07Rik	-0.511442	0.256276	0.955693	-0.365703	0.337339	0.960134	-0.389425	0.356973	0.530779	-1.25192	0.0597854	0.243494	-1.11174	0.0269501	0.121679	-0.532884	0.0696816	0.264754	-0.487706	0.163363	0.487258	0.444317	0.0723763	0.121827
B230120H23Rik	0.476409	0.225203	0.955693	0.505787	0.133131	0.845712	1.27843	0.000168273	0.00403279	-0.767656	0.124247	0.336781	-0.478264	0.315849	0.530841	0.489842	0.165239	0.427225	0.43611	0.268514	0.602331	-0.208849	0.543478	0.636311
B230208H17Rik	-0.00117645	0.99333	1	0.0373235	0.862617	0.996527	-0.124244	0.600735	0.739709	0.712882	0.0467956	0.222371	0.446486	0.183227	0.381517	0.250468	0.1962	0.4699	0.4909	0.0585135	0.29523	0.311086	0.087787	0.143016
B230219D22Rik	-0.7411	0.0516491	0.955693	-0.801297	0.021426	0.460983	-1.2934	0.000298075	0.00589068	-0.432503	0.192353	0.41933	-0.275458	0.355318	0.570199	-0.0434781	0.818997	0.924296	0.113767	0.635904	0.855596	-0.215914	0.246613	0.337706
B230312A22Rik	0.666305	0.167873	0.955693	-0.136692	0.801265	0.996172	2.11547	2.03536e-07	2.33075e-05	0.356697	0.381381	0.605308	-0.219343	0.570066	0.747734	-0.479655	0.0737882	0.272743	0.187538	0.552867	0.814769	0.802825	0.000538403	0.00173145
B230315N10Rik	-0.222777	0.621198	0.962615	-0.112364	0.787117	0.996172	-0.540704	0.169813	0.328237	-1.3185	0.035443	0.203633	-1.26263	0.0355434	0.144431	0.0748107	0.792471	0.914743	-0.548888	0.199193	0.531861	0.861533	0.000288231	0.00100508
B230339M05Rik	0.111147	0.672457	0.967922	-0.0402562	0.8781	0.996527	0.0266221	0.903937	0.942763	-0.600981	0.184509	0.411028	-0.286303	0.52741	0.715157	0.145266	0.478552	0.732573	0.0718467	0.796725	0.932378	-0.36963	0.0403788	0.0746398
B230380D07Rik	0.121507	0.766792	0.974201	-0.108854	0.832553	0.996172	-0.309022	0.462417	0.625837	0.583738	0.173195	0.396818	0.841621	0.0214219	0.1061	0.44145	0.0784884	0.281768	0.504298	0.106222	0.397433	-0.510298	0.0222049	0.0445975
B2m	-0.760766	0.0797358	0.955693	-0.407497	0.290921	0.949068	-0.931934	0.0193614	0.0835258	-1.02152	0.252476	0.482426	-0.157099	0.826287	0.913015	0.140286	0.647779	0.836655	-0.338386	0.507595	0.790213	0.694042	0.00718232	0.0166852
B3galnt1	-0.616474	0.0926237	0.955693	-0.770176	0.0215249	0.460983	-1.46173	1.87487e-05	0.000858311	-0.934511	0.0497355	0.227238	-0.714161	0.0784401	0.228965	-0.492424	0.0137499	0.0997124	-0.255132	0.298555	0.628339	-0.396758	0.0246385	0.0488172
B3galnt2	-0.209016	0.566641	0.958003	0.327737	0.279337	0.948861	0.25266	0.375537	0.549459	-0.405734	0.263072	0.492396	-0.646066	0.0642816	0.203426	-0.576941	0.00721838	0.0665184	-0.621139	0.0227497	0.184437	0.414149	0.0238812	0.0474959
B3galt1	0.0849225	0.837546	0.981501	0.316245	0.457603	0.967764	-0.445851	0.300277	0.474848	-0.424759	0.460622	0.673159	-0.2099	0.667532	0.815909	0.1821	0.621314	0.821581	-0.0331224	0.947579	0.986529	-0.153358	0.585129	0.67354
B3galt6	-0.0784594	0.851453	0.984587	-0.347164	0.320052	0.955127	-0.700907	0.0309798	0.111738	-0.0517064	0.906462	0.956333	0.0446788	0.907907	0.956297	-0.111548	0.668353	0.848646	-0.47523	0.138448	0.45095	0.0220299	0.930806	0.951592
B3galtl	-0.311742	0.405147	0.955693	-0.25292	0.454128	0.967686	-0.423495	0.163783	0.321126	0.342787	0.33399	0.56162	0.108028	0.742114	0.862803	0.0762702	0.723551	0.877298	0.357224	0.190888	0.523083	0.0604434	0.744312	0.808298
B3gnt1	0.115982	0.71488	0.972787	0.14611	0.619926	0.986881	-0.00418722	0.999557	1	-0.0993819	0.769738	0.879449	-0.357933	0.26294	0.475898	-0.485235	0.0150232	0.104774	-0.422359	0.0990742	0.383389	-0.800106	9.71974e-06	4.82602e-05
B3gnt2	-0.0875458	0.857385	0.985341	-0.134466	0.755402	0.9929	-0.0537718	0.891108	0.934755	-0.23672	0.545969	0.735129	-0.403818	0.264732	0.477675	-0.0533532	0.82552	0.928066	-0.134101	0.639168	0.856505	0.369604	0.0647068	0.110674
B3gnt5	-0.498861	0.341107	0.955693	-0.374508	0.428239	0.962981	-1.64619	0.000187573	0.00435344	-2.22501	0.000760675	0.0412583	-2.47264	7.97171e-06	0.000401806	-0.714256	0.0598581	0.242445	-0.743113	0.106894	0.398806	-1.62418	1.70446e-05	7.96372e-05
B3gntl1	-0.0810644	0.905483	0.991053	-0.290844	0.554035	0.980133	-0.547685	0.191596	0.355878	-0.126783	0.753081	0.869493	0.0688576	0.851777	0.927825	0.798378	0.000521706	0.0111905	0.345094	0.231552	0.563357	0.232916	0.266212	0.359463
B4galnt1	0.309364	0.6129	0.962589	-0.151374	0.884433	0.996527	1.06543	0.0630192	0.174898	0.114316	0.745275	0.865067	0.0495839	0.883469	0.944559	-0.353195	0.115032	0.34799	0.210939	0.427207	0.73471	-0.265933	0.200257	0.284162
B4galt1	0.139379	0.672543	0.967922	0.217104	0.476885	0.970314	0.344368	0.25639	0.429032	0.196389	0.540214	0.730633	0.219118	0.460625	0.660495	-0.00302175	0.987942	0.998244	0.0669815	0.779128	0.923479	-0.585587	0.00104824	0.00312095
B4galt2	0.730537	0.230553	0.955693	-0.420015	0.505143	0.974559	0.538554	0.304108	0.478781	0.701596	0.0520817	0.230562	0.446857	0.19518	0.397558	0.0709532	0.731416	0.881373	0.166094	0.52142	0.79678	0.166575	0.399698	0.499936
B4galt3	0.288741	0.637024	0.962838	-0.0826548	0.939621	0.996961	1.10979	0.0439172	0.139083	0.624806	0.0795564	0.275685	0.780574	0.0170007	0.0918608	0.161165	0.445686	0.706696	0.171337	0.526882	0.798768	1.18953	5.61941e-11	7.52775e-10
B4galt5	-0.158563	0.593045	0.961274	-0.0271059	0.926237	0.996527	0.106253	0.698976	0.80888	0.300153	0.394216	0.616078	1.12358	0.00149229	0.0177722	-1.0127	6.54199e-05	0.00233175	0.155023	0.58753	0.831473	-2.17967	1.31234e-18	4.99371e-17
B4galt6	-0.110935	0.770656	0.974201	-0.0119371	0.985728	1	-0.171782	0.576797	0.720454	0.493444	0.155398	0.374246	0.482183	0.129541	0.312253	-0.16318	0.436755	0.700524	0.143098	0.576143	0.827707	-0.437214	0.0193497	0.0395957
B4galt7	-0.578234	0.228333	0.955693	-0.405311	0.36803	0.960134	-0.0555135	0.887624	0.932974	0.53389	0.198509	0.426322	0.179757	0.640193	0.79994	0.0625301	0.800995	0.91769	0.0354339	0.914285	0.975472	-0.261467	0.206238	0.291184
B630005N14Rik	-0.331231	0.308093	0.955693	-0.182159	0.538718	0.979378	-0.153937	0.579954	0.723303	-0.126715	0.790098	0.892452	-0.620784	0.142455	0.329166	-0.0627358	0.853935	0.941693	-0.470208	0.208266	0.542122	-0.649756	0.0353857	0.0665692
B630019K06Rik	-0.317783	0.458391	0.955693	-0.335999	0.385195	0.960134	-1.05879	0.00334773	0.0280274	0.738199	0.132007	0.345168	-0.220825	0.589533	0.763088	-0.0673717	0.806009	0.920152	0.235357	0.52168	0.796933	0.248515	0.267641	0.361003
B930041F14Rik	0.131915	0.860301	0.986037	-0.0754324	0.95099	0.99724	-0.0901924	0.897878	0.939388	0.187006	0.659008	0.811261	-0.333218	0.381822	0.595032	-0.0628644	0.812879	0.922298	0.140867	0.657602	0.863483	-0.514335	0.0344969	0.0651921
B9d1	-0.225676	0.615006	0.962589	-0.380768	0.344216	0.960134	0.0834132	0.804296	0.876175	0.0121359	0.976026	0.989812	0.0742804	0.840025	0.919828	-0.0994351	0.66486	0.847563	0.0374082	0.896685	0.970048	0.452583	0.0217643	0.0438007
Bace1	-0.0519112	0.904584	0.991053	0.020519	0.936377	0.996706	0.608321	0.0469177	0.144876	0.436064	0.201514	0.429356	0.0559751	0.861295	0.932378	-0.0700865	0.748654	0.891276	0.14854	0.561934	0.819799	-0.952594	1.66618e-06	9.98223e-06
Bach1	-0.0540439	0.876471	0.986758	0.548879	0.0290918	0.5264	0.298994	0.247073	0.419708	0.357753	0.285238	0.514847	0.449151	0.161947	0.354903	-0.129331	0.565623	0.790725	0.220651	0.401929	0.712356	-0.807849	3.22374e-05	0.000142044
Bad	0.180993	0.687235	0.971177	-0.539961	0.245559	0.93973	0.0879699	0.825418	0.892006	1.18073	0.00394533	0.089896	0.808667	0.0291964	0.127214	0.104274	0.629693	0.826446	0.321412	0.293961	0.624328	0.773203	0.000112383	0.000435904
Bag1	-0.11957	0.671691	0.967922	0.00551556	0.97328	0.999212	-0.0446928	0.855314	0.912645	0.300436	0.3933	0.61555	-0.345566	0.292142	0.506792	-0.447878	0.0304985	0.161951	0.0738056	0.82069	0.941111	-0.0100362	0.954066	0.968132
Bag2	-0.304683	0.422053	0.955693	0.149954	0.646793	0.989904	0.460383	0.140984	0.289616	0.672188	0.0480298	0.22483	1.5904	1.73066e-06	0.000121634	0.0571967	0.776119	0.905185	0.583056	0.0325752	0.222324	0.217842	0.228964	0.318077
Bag3	-0.0192495	0.964953	0.998784	0.876986	0.000580125	0.044969	1.49668	1.21485e-08	2.23999e-06	2.45547	1.61482e-09	3.22318e-06	4.24703	3.9427e-22	1.31161e-18	0.106234	0.577923	0.7973	0.668579	0.0096496	0.124229	0.82259	5.12883e-06	2.72555e-05
Bag4	-0.45219	0.2179	0.955693	0.0820677	0.790705	0.996172	-0.171291	0.58143	0.7247	0.533916	0.145279	0.360847	0.260105	0.44345	0.645944	0.0265212	0.907313	0.964507	0.216496	0.41855	0.727724	-0.43327	0.0326273	0.062165
Bag5	0.36435	0.276375	0.955693	-0.145155	0.665503	0.990689	0.108992	0.713756	0.819155	-0.00965351	0.977109	0.990169	0.215996	0.483108	0.678156	0.416425	0.0375544	0.183632	-0.0333137	0.895316	0.969642	0.614244	0.000611616	0.00193827
Bahcc1	0.409255	0.3455	0.955693	-0.729565	0.0759891	0.722258	-0.248873	0.524175	0.676661	1.04009	0.00969666	0.133408	0.791381	0.0239485	0.11324	0.151099	0.491462	0.742223	0.828577	0.00330149	0.0678964	-1.21919	2.99143e-09	3.05573e-08
Bahd1	0.489135	0.344108	0.955693	0.473829	0.33513	0.960134	1.3528	0.00337639	0.0281507	1.10876	0.00327632	0.0846879	0.496931	0.129915	0.312799	-0.162225	0.456888	0.715635	0.399949	0.13459	0.44551	0.136008	0.476868	0.574984
Baiap2	0.110789	0.763274	0.974201	-0.139702	0.718122	0.9929	0.617068	0.0669584	0.182041	0.906621	0.0128444	0.146258	1.36954	0.000157251	0.00358302	0.259963	0.200728	0.474355	0.335174	0.213678	0.545538	-0.555779	0.00262583	0.00699008
Baiap2l1	-0.214915	0.608829	0.96167	0.0102158	0.972475	0.999189	-0.480178	0.159422	0.315305	0.763148	0.0750518	0.267106	0.936272	0.0134741	0.078915	0.746133	0.00212933	0.0298465	0.818998	0.0055745	0.0921085	0.954959	4.71604e-06	2.52771e-05
Bak1	0.459492	0.369958	0.955693	-0.153768	0.781112	0.996145	1.32735	0.00603599	0.0408875	0.392251	0.221771	0.451168	0.310465	0.306458	0.521405	-0.127756	0.516632	0.759351	0.76163	0.00168202	0.0453691	-0.301367	0.106802	0.168573
Bambi	-0.156201	0.704238	0.972787	-0.39401	0.283781	0.948861	-0.939485	0.00719588	0.0451666	-0.547678	0.174574	0.398685	-1.33763	0.00148735	0.0177345	-0.295619	0.189889	0.461767	-0.407049	0.141739	0.455575	-0.965018	1.6395e-06	9.84491e-06
Bambi-ps1	0.00341499	1	1	-0.114643	0.897173	0.996527	-1.72792	0.00971118	0.0550448	0.341851	0.631971	0.794782	1.20759	0.022617	0.109208	0.580628	0.205322	0.478935	0.370183	0.493875	0.782952	0.504398	0.242141	0.332906
Banf1	-0.210492	0.487664	0.955693	-0.0916359	0.737449	0.9929	-0.567229	0.0297542	0.109074	-0.491085	0.175505	0.399785	-0.549844	0.124904	0.305002	-0.297164	0.251558	0.533139	-0.181014	0.542163	0.808424	0.08919	0.690063	0.76376
Banp	-0.353747	0.319798	0.955693	-0.598868	0.0688496	0.696238	-0.359382	0.239138	0.410588	0.769319	0.0300387	0.191585	1.69322	6.28237e-07	5.34716e-05	-0.317413	0.165655	0.427857	-0.21713	0.471168	0.770017	0.61516	0.00304643	0.00790108
Bap1	0.09391	0.752373	0.974198	0.202215	0.472266	0.969284	0.595319	0.0289759	0.107647	-0.0271448	0.931705	0.96909	-0.366658	0.222171	0.428788	-0.228083	0.229546	0.507841	-0.102992	0.662395	0.865615	-0.379658	0.0297586	0.0574006
Bard1	0.232125	0.47698	0.955693	0.0703305	0.801056	0.996172	0.105291	0.70361	0.811889	-0.957551	0.0416356	0.215632	-0.920597	0.045111	0.166128	-0.563291	0.0385662	0.186027	-0.315393	0.406428	0.716507	-1.89049	8.06896e-12	1.2485e-10
Basp1	-0.288763	0.306523	0.955693	-0.222812	0.374791	0.960134	-0.970874	0.000113897	0.00312278	1.46803	0.000426424	0.0322403	0.626215	0.074101	0.221425	0.238098	0.355904	0.638202	0.409911	0.20511	0.538981	0.906468	0.000391362	0.00131641
Bat1a	0.0102498	0.957889	0.998784	-0.419562	0.0968198	0.779872	-0.189167	0.456882	0.620703	-0.227628	0.474433	0.682745	-0.0874382	0.764325	0.876751	-0.194435	0.302381	0.587456	-0.0743237	0.750474	0.912187	0.408645	0.022587	0.0452646
Bat2	0.508715	0.271925	0.955693	0.0941432	0.805157	0.996172	0.928667	0.0311064	0.111951	1.48151	0.000352682	0.0310939	1.30345	0.000361201	0.00645627	0.31727	0.148026	0.401769	0.976165	0.000414635	0.0203845	0.481929	0.0170538	0.0354578
Bat2d	0.138527	0.571702	0.958723	0.527586	0.0177845	0.421591	0.158034	0.481409	0.640892	0.205097	0.521315	0.716826	0.358641	0.218175	0.42411	0.436307	0.0276599	0.153206	0.551406	0.0254587	0.195746	-1.08747	2.06233e-09	2.16881e-08
Bat2l	0.176449	0.52263	0.95698	0.355349	0.146519	0.855718	0.757583	0.00391067	0.0311245	0.971721	0.00871308	0.128634	1.05723	0.00202909	0.0216581	0.114304	0.618595	0.820628	0.618258	0.0232007	0.186578	-0.375109	0.0718479	0.121102
Bat3	0.737112	0.227739	0.955693	0.112383	0.81713	0.996172	1.41367	0.0127479	0.0651764	0.959066	0.0115858	0.141873	0.900323	0.0107573	0.0679006	0.0547868	0.784864	0.911194	0.501512	0.0579555	0.293327	-0.0335086	0.857534	0.897837
Bat4	0.41486	0.461861	0.955693	-0.112405	0.927498	0.996527	1.52101	0.0040115	0.0315235	1.13636	0.00791621	0.124514	1.6555	3.07579e-05	0.00114535	0.735928	0.00205923	0.029169	0.782977	0.0107164	0.128805	0.923933	4.14492e-06	2.24695e-05
Bat5	0.305536	0.537403	0.957503	-0.450938	0.361007	0.960134	0.411365	0.359133	0.532648	0.807921	0.0390726	0.21044	0.449889	0.215643	0.421313	0.174672	0.438544	0.70186	0.219145	0.454645	0.756857	0.550262	0.0094917	0.0212631
Bax	0.287384	0.411587	0.955693	0.374552	0.256174	0.93973	0.575631	0.0644037	0.177212	0.412291	0.247911	0.477894	0.0146978	0.963189	0.984553	-0.360381	0.0624431	0.248082	-0.196144	0.493145	0.782952	0.899338	2.82258e-06	1.59419e-05
Baz1a	-0.0862427	0.761163	0.974198	0.369737	0.116303	0.822555	-0.333818	0.168779	0.326954	-1.06647	0.0315269	0.195307	-0.685044	0.194945	0.397376	-0.517506	0.0262265	0.148555	-0.515537	0.0902054	0.364326	-1.05037	5.31831e-07	3.58869e-06
Baz1b	0.0957835	0.700332	0.972227	0.129161	0.562716	0.980133	-0.096081	0.682762	0.798028	0.0994502	0.758795	0.87266	0.278521	0.356789	0.571091	0.307313	0.128179	0.3697	0.1926	0.428385	0.735697	-1.08818	8.52299e-09	7.99431e-08
Baz2a	0.233151	0.45493	0.955693	0.0428767	0.869065	0.996527	0.746952	0.00655223	0.042905	0.0324885	0.916893	0.962064	0.0508902	0.863074	0.933609	0.0254095	0.895958	0.960244	0.131973	0.574936	0.82719	-0.298467	0.0957843	0.153743
Baz2b	-0.141942	0.641007	0.962838	-0.032701	0.90906	0.996527	-0.76327	0.00769506	0.0472305	0.0272076	0.934628	0.970308	0.197615	0.510841	0.701813	0.389118	0.0468181	0.209621	0.281392	0.254306	0.58831	-0.456754	0.0112704	0.0247969
BB287469	-0.540944	0.357581	0.955693	-0.10414	0.852737	0.996527	-0.908151	0.0830514	0.206866	-2.17566	0.00197971	0.0672382	-2.52172	8.58645e-08	1.07116e-05	-0.778273	0.0163128	0.110248	-0.683667	0.1898	0.520976	-0.300703	0.276873	0.370998
Bbc3	0.330221	0.467437	0.955693	0.815935	0.0565926	0.670959	0.135125	0.726713	0.828205	1.28868	0.00736255	0.120285	2.04776	2.03552e-07	2.16112e-05	1.32288	1.07385e-07	1.14201e-05	0.987424	0.00526708	0.0888256	2.1152	2.54578e-17	8.24899e-16
Bbs10	-0.732762	0.172495	0.955693	-1.15821	0.0278867	0.516345	-0.721099	0.131797	0.277087	-0.0198091	1	1	0.45118	0.302209	0.517599	1.01962	0.00140161	0.0222386	0.0686178	0.867755	0.960502	0.0447394	0.875701	0.910839
Bbs12	-0.10071	0.810209	0.97996	-0.360022	0.30811	0.955127	-0.319758	0.312158	0.486544	-2.34345	0.000370759	0.0310939	-2.41292	1.0954e-05	0.000497855	-0.537755	0.0377926	0.184075	-0.609924	0.0891727	0.362062	-1.42988	7.6526e-11	1.00491e-09
Bbs2	-0.146387	0.784247	0.976016	-0.186265	0.697958	0.991213	0.083644	0.82553	0.89203	-0.315047	0.455685	0.669573	0.419775	0.239876	0.450097	0.220399	0.356617	0.638864	-0.18142	0.581029	0.829329	0.103887	0.613248	0.698632
Bbs4	-0.337705	0.506528	0.955693	-0.274042	0.567084	0.980805	-0.154501	0.694662	0.806022	-0.941406	0.131996	0.345168	-0.766798	0.0984556	0.262653	0.772614	0.00522947	0.0536384	-0.070232	0.848124	0.951812	0.310749	0.193685	0.276335
Bbs5	-0.894676	0.151075	0.955693	-0.646276	0.249229	0.93973	0.0136593	0.978482	0.987961	-0.505302	0.370774	0.596249	-0.963932	0.056253	0.187698	0.294274	0.456551	0.715526	-0.701287	0.122953	0.426019	1.41089	0.000255494	0.000902274
Bbs7	-0.463712	0.214489	0.955693	-0.589024	0.093637	0.770871	-0.40413	0.237642	0.408979	-0.465144	0.325857	0.554484	-0.337693	0.423203	0.630581	0.266127	0.370393	0.648991	-0.0526272	0.880645	0.963827	0.28202	0.273137	0.366533
Bbs9	0.33823	0.497039	0.955693	0.201019	0.658742	0.990689	0.863409	0.0454619	0.142051	-0.705827	0.113029	0.323056	-0.169085	0.653201	0.807088	-0.0734863	0.784349	0.910845	-0.42163	0.194106	0.526406	-0.557271	0.0178283	0.0369218
Bbx	-0.0469266	0.873152	0.986641	0.0908462	0.685399	0.991213	-0.309167	0.195864	0.360849	-0.12386	0.761331	0.873946	0.791966	0.022255	0.10832	0.24585	0.229859	0.508083	0.405095	0.14937	0.466931	-0.589652	0.018379	0.0378816
BC002199	-0.317832	0.299247	0.955693	-0.23743	0.378673	0.960134	-1.05263	9.09585e-05	0.0026312	0.129583	0.672502	0.818085	0.357763	0.21568	0.421313	0.000219166	0.999334	1	0.208803	0.379987	0.696317	-0.053819	0.757556	0.819467
BC002230	0.246142	0.50079	0.955693	-0.0300578	0.964419	0.998839	0.7269	0.0278849	0.105374	-0.124755	0.732281	0.857609	-0.36273	0.282013	0.496434	0.25069	0.271032	0.55456	0.321484	0.232733	0.564854	0.14193	0.462992	0.560691
BC003266	0.116087	0.797894	0.978114	-0.56247	0.194197	0.910963	0.556043	0.164824	0.322159	0.098149	0.780353	0.885685	-0.135432	0.686118	0.82899	-0.196361	0.362229	0.642904	0.0705417	0.814037	0.938875	0.38736	0.0584822	0.101697
BC003267	0.0572109	0.84771	0.984087	0.0182004	0.938415	0.996908	-0.206915	0.519838	0.673369	-1.18163	0.0197403	0.169044	-0.523956	0.192321	0.394165	-0.344344	0.208788	0.482454	-1.027	0.008092	0.112633	-0.0304654	0.89891	0.928111
BC003331	-0.528297	0.119815	0.955693	-0.226118	0.461577	0.967931	-0.204904	0.481439	0.640892	0.360134	0.409052	0.628632	0.369413	0.357331	0.571591	0.647288	0.0142816	0.101953	0.598287	0.0633594	0.304883	0.681685	0.0032595	0.00838831
BC003885	-0.378314	0.305366	0.955693	-0.218512	0.514052	0.975024	-0.885045	0.00668493	0.0433665	-0.223796	0.520191	0.716203	-0.461013	0.163684	0.357451	-0.263357	0.273942	0.558632	-0.367828	0.174649	0.502739	0.178843	0.400238	0.500235
BC003940	0.0666206	0.880187	0.987001	-1.01127	0.0277456	0.514914	0.171805	0.68765	0.800974	0.59572	0.134313	0.34844	0.649432	0.0783295	0.228954	0.19507	0.451619	0.711581	0.276509	0.364275	0.682779	1.0827	2.65532e-05	0.000119102
BC004004	0.424292	0.352501	0.955693	-0.111269	0.838801	0.996172	0.218025	0.599792	0.738911	-0.659589	0.0829948	0.281827	-0.493853	0.132364	0.316178	0.0219181	0.915095	0.967965	-0.33205	0.195842	0.529166	0.529072	0.00287132	0.00750543
BC005537	0.199419	0.509062	0.955693	0.581341	0.030845	0.537249	0.97576	0.000154251	0.00381991	0.534884	0.0927835	0.294242	0.559597	0.0619622	0.199483	0.249764	0.192298	0.464441	0.35393	0.176045	0.504589	0.467402	0.00735553	0.0170439
BC005561	0.11902	0.728476	0.973017	0.358458	0.244796	0.93973	0.651971	0.0454909	0.142097	-0.321327	0.595286	0.771252	-0.196287	0.737168	0.859343	0.90215	0.0271962	0.152311	0.000199079	1	1	-0.475895	0.209161	0.294584
BC005624	-0.195331	0.535014	0.957503	0.0985632	0.70212	0.992064	0.0261729	0.921748	0.95406	0.51944	0.123559	0.335999	1.07557	0.00168366	0.0191377	0.260416	0.231403	0.510132	0.322029	0.223802	0.555055	0.658366	0.00166065	0.00469231
BC006779	0.366634	0.420305	0.955693	0.100404	0.794382	0.996172	1.38741	0.000238186	0.00507108	0.285381	0.435879	0.653301	0.0486752	0.89091	0.947595	0.429333	0.0747331	0.273743	0.202627	0.473927	0.770428	0.747604	0.000790035	0.0024305
BC011248	0.438895	0.233686	0.955693	0.58627	0.0771551	0.726398	0.466239	0.134534	0.280421	0.371437	0.294272	0.523874	0.663933	0.051679	0.177902	0.347391	0.103631	0.329166	0.305886	0.233406	0.566085	1.20614	3.33895e-09	3.38699e-08
BC011426	-1.07071	0.0618452	0.955693	-0.681223	0.198587	0.913149	-0.829518	0.100705	0.233349	-0.19582	0.727579	0.854614	0.0443546	0.926261	0.965339	0.890652	0.00799259	0.0713471	0.378608	0.388865	0.702434	0.683392	0.0323434	0.061676
BC013529	-0.631543	0.153174	0.955693	-0.432236	0.285743	0.948861	-0.759462	0.0601899	0.169637	-0.100126	0.816373	0.905449	-0.803221	0.0531825	0.181147	-0.247566	0.375064	0.653531	-0.4559	0.151809	0.471098	0.515206	0.0193719	0.0396171
BC016423	-0.0427603	0.880575	0.987001	0.143668	0.527155	0.978494	-0.37409	0.107939	0.243829	-0.810287	0.085929	0.286224	-1.11796	0.0144469	0.0828985	-0.139638	0.682865	0.856568	-0.384296	0.316892	0.643717	-0.845666	0.00607489	0.0143871
BC016495	-0.120943	0.79029	0.977712	-0.163389	0.679393	0.991186	-0.0523238	0.896694	0.938567	-1.29645	0.0410587	0.214671	-1.2548	0.0126274	0.0755609	-0.417594	0.197232	0.470973	-0.476304	0.295929	0.62621	0.0805585	0.712627	0.783332
BC017158	0.33497	0.420308	0.955693	0.128552	0.730801	0.9929	0.820224	0.0191295	0.0830416	0.615721	0.0870208	0.287705	0.194782	0.576297	0.753201	0.420697	0.0499143	0.217607	0.581934	0.028304	0.206845	0.542172	0.00312112	0.00807799
BC017612	-0.209591	0.622931	0.962838	-0.267435	0.508677	0.975024	-0.572884	0.11328	0.251457	0.233294	0.589476	0.76681	0.0684102	0.866621	0.935115	-0.731858	0.0139381	0.10029	-0.361813	0.319523	0.645806	-0.115909	0.666555	0.744763
BC017643	0.351327	0.572148	0.958723	0.341037	0.56357	0.980133	0.84467	0.140902	0.289616	0.0543258	0.879677	0.941568	0.962617	0.00310497	0.0289875	0.0156096	0.942702	0.978692	-0.373178	0.155622	0.476111	-0.221821	0.24265	0.333514
BC017647	0.529129	0.272283	0.955693	0.210519	0.625275	0.986881	1.14425	0.00898278	0.052273	0.812753	0.0206967	0.171238	0.950907	0.00373593	0.0332304	-0.266023	0.2186	0.493841	0.300822	0.238374	0.571289	-0.266182	0.181959	0.261477
BC018473	1.09409	0.158159	0.955693	1.51227	0.0542559	0.663414	1.30468	0.0532976	0.157547	-1.07691	0.232142	0.461418	-0.699473	0.215434	0.421313	-0.421642	0.440049	0.702191	-0.000470361	1	1	0.160658	0.692658	0.765868
BC019943	0.279966	0.526725	0.957381	-0.369681	0.373465	0.960134	0.45428	0.191449	0.355736	-0.65399	0.12105	0.332895	-0.179064	0.609911	0.777582	0.532706	0.0152628	0.105753	0.0670812	0.812892	0.938303	0.795485	2.94539e-05	0.000131228
BC021381	0.129655	0.7585	0.974198	-0.172443	0.735633	0.9929	1.11298	0.00389972	0.0310857	0.7968	0.0446765	0.220273	0.674999	0.0745306	0.222366	0.072601	0.786105	0.911453	0.448924	0.151947	0.47138	0.197734	0.444832	0.543714
BC021785	-1.44784	0.0466445	0.955693	-1.53243	0.0277579	0.514914	-2.37291	0.000185885	0.00433496	-0.34884	0.473881	0.682121	0.720755	0.100345	0.265564	-0.461695	0.159608	0.418741	-0.427561	0.274781	0.606998	-0.367559	0.224184	0.312654
BC023179	-0.0986962	0.855107	0.984878	0.035096	0.909148	0.996527	0.0561288	0.865571	0.919174	-1.37298	0.0225004	0.175682	-0.664617	0.19681	0.399201	-0.141258	0.665391	0.847563	-0.682051	0.075556	0.334538	-0.935737	8.19038e-05	0.000329198
BC023744	0.366404	0.435184	0.955693	0.173678	0.683722	0.991213	0.741013	0.063292	0.175329	0.848472	0.0328412	0.19827	0.858912	0.0202764	0.102668	0.226917	0.357934	0.639604	0.28554	0.337523	0.659292	-0.876514	5.26516e-05	0.000221434
BC023814	-0.19176	0.727414	0.973017	-0.72067	0.164763	0.875238	0.318813	0.463256	0.626209	0.490891	0.238046	0.468395	0.804188	0.0384413	0.151458	0.313543	0.194678	0.46836	0.0958371	0.763828	0.917863	0.626194	0.00380577	0.00959374
BC023882	-0.647063	0.127427	0.955693	-0.166681	0.660007	0.990689	-0.69651	0.0744822	0.194031	-2.08244	0.00123104	0.0539099	-3.17997	1.26709e-09	2.94082e-07	-0.764942	0.0899043	0.304874	-1.68312	0.000169864	0.0125573	-1.67211	3.84419e-05	0.000165723
BC024479	-1.08389	0.0498315	0.955693	-0.846166	0.0928129	0.768802	-1.22952	0.010938	0.0595209	0.57964	0.1941	0.421465	-0.489085	0.194205	0.396469	0.224609	0.39222	0.665933	-0.0650606	0.845417	0.950463	0.564654	0.0138452	0.029645
BC024659	-0.179538	0.643915	0.962838	0.157244	0.615341	0.986881	-0.980785	0.0025189	0.0232335	-0.120823	0.769151	0.87916	-0.384438	0.427876	0.634075	0.363275	0.115883	0.349506	0.0705653	0.82355	0.942364	0.604019	0.00193484	0.00535341
BC024814	-0.287465	0.627063	0.962838	0.394046	0.408206	0.960673	-0.159456	0.728039	0.829054	0.159643	0.744079	0.86408	0.327125	0.464753	0.663363	0.340167	0.253555	0.534852	0.212598	0.570735	0.824439	1.36899	1.4389e-07	1.0781e-06
BC026590	0.0329509	0.907609	0.991053	-0.0512303	0.888295	0.996527	-0.0411502	0.900278	0.940125	0.0337018	0.920635	0.96324	-0.10036	0.749671	0.86815	0.180783	0.373129	0.651702	0.314546	0.198291	0.530976	0.326932	0.0647237	0.110682
BC027231	-0.328419	0.348858	0.955693	0.102388	0.720073	0.9929	-0.442501	0.132949	0.278513	-0.328524	0.415934	0.635102	-0.740668	0.0881545	0.245475	0.261358	0.314039	0.599001	-0.0110842	0.973233	0.995069	-0.0922823	0.698971	0.771652
BC027344	-0.563547	0.207695	0.955693	-0.159489	0.701347	0.992064	-0.365719	0.319338	0.493343	-0.91133	0.0673278	0.255788	-0.601017	0.182249	0.380193	0.0454392	0.886	0.955933	-0.189401	0.596083	0.836486	-0.340015	0.147596	0.220544
BC028528	-0.218593	0.69223	0.971177	0.685228	0.1718	0.882375	2.24546	1.95787e-07	2.29269e-05	-1.33209	0.150091	0.367584	-1.58644	0.0100144	0.0645629	-0.60405	0.18513	0.45567	-0.898678	0.12954	0.438065	-2.74327	1.20416e-19	5.13568e-18
BC030307	-0.205732	0.8968	0.98914	0.299998	0.529492	0.97863	0.613011	0.21202	0.379477	-1.24484	0.0420791	0.215801	0.9697	0.0430877	0.161854	0.219069	0.536608	0.77133	-0.347598	0.439179	0.744903	0.606563	0.0445132	0.0809036
BC030867	0.127217	0.706246	0.972787	-0.469794	0.17204	0.882375	0.27208	0.376884	0.550864	-0.030296	0.929478	0.967883	-0.405202	0.220106	0.426053	0.320252	0.107493	0.336506	0.400917	0.103631	0.393246	-0.353059	0.0470115	0.0847191
BC031181	0.102386	0.749729	0.974136	-0.214872	0.502638	0.974559	0.0428193	0.883489	0.930479	0.19184	0.602956	0.775556	0.666475	0.0502274	0.17533	-0.281834	0.196891	0.470759	-0.322498	0.237298	0.570316	0.607548	0.00114378	0.00337221
BC031441	-1.22889	0.0640113	0.955693	-1.57872	0.012052	0.345629	-1.76423	0.00118456	0.0143122	0.291689	0.67479	0.819127	0.753078	0.22974	0.437808	1.3314	0.00289505	0.036477	0.948583	0.106593	0.398277	1.26543	0.00417537	0.010399
BC031748	0.0162097	0.96921	0.999247	0.123154	0.746284	0.9929	0.5505	0.133898	0.279502	1.1095	0.0203942	0.170444	1.04215	0.00979583	0.063606	0.267248	0.334296	0.618345	0.291397	0.388686	0.702434	-0.799213	0.00345944	0.00882772
BC031781	0.201246	0.55948	0.957503	0.233575	0.452898	0.967686	0.833603	0.00622176	0.0416174	0.448667	0.168472	0.390907	1.09927	0.000803082	0.0113363	0.392807	0.0641711	0.252567	0.0338847	0.896977	0.970048	0.233668	0.20797	0.293197
BC032203	-0.571399	0.14359	0.955693	-0.820669	0.0249276	0.496351	-0.544195	0.104483	0.238559	0.341652	0.323657	0.552554	1.08476	0.0005135	0.00827089	0.639159	0.00224761	0.0306018	0.471415	0.0769389	0.336978	-0.0360093	0.850962	0.892173
BC033915	0.165659	0.573527	0.958767	0.00660063	0.967546	0.998839	0.308393	0.222835	0.391324	0.221275	0.483409	0.690091	0.73601	0.0150174	0.0848182	0.499188	0.011855	0.0913523	0.459909	0.0533336	0.282221	-0.26215	0.162294	0.237736
BC037034	0.0139328	0.947246	0.997497	-0.24591	0.618634	0.986881	0.0553697	0.872661	0.923519	0.772131	0.0591175	0.242496	0.62598	0.0968046	0.26024	0.309594	0.191552	0.463889	0.575101	0.0605538	0.29955	0.698685	0.00200544	0.00551358
BC037112	-0.0848961	0.750282	0.974136	-0.0637023	0.788186	0.996172	-0.0248868	0.916489	0.951091	0.408899	0.200574	0.428177	0.11937	0.691434	0.832613	0.562347	0.00627904	0.0606043	0.557274	0.0255716	0.19616	-0.316268	0.105509	0.166876
BC043301	-0.153071	0.746934	0.974136	-0.4232	0.317127	0.955127	-0.292119	0.430084	0.596558	-0.207522	0.667962	0.81459	0.220532	0.616501	0.783867	0.0352765	0.905824	0.963971	-0.618608	0.0907105	0.365036	-1.09505	5.56005e-07	3.74092e-06
BC046331	0.216478	0.57233	0.958767	0.396267	0.255698	0.93973	1.02525	0.00182009	0.0189608	0.531561	0.118894	0.329479	0.629388	0.0518815	0.178421	0.0185476	0.931318	0.974756	0.407873	0.125066	0.430549	-0.254377	0.167152	0.243876
BC046404	0.236584	0.626694	0.962838	-0.329563	0.556633	0.980133	0.339371	0.428956	0.595325	0.689562	0.100829	0.305394	0.800505	0.0318845	0.134719	0.0342482	0.894608	0.959917	0.0827114	0.791555	0.929817	-0.32407	0.130768	0.199337
BC048355	0.0452854	0.902003	0.990652	-0.429294	0.338078	0.960134	-0.491237	0.18759	0.350984	-0.143423	0.710028	0.843483	-0.346305	0.303397	0.5183	-0.586417	0.00827093	0.0729187	-0.521525	0.0530614	0.281077	0.289571	0.125174	0.192576
BC048403	-0.278003	0.514794	0.956456	-0.702193	0.0788758	0.729011	-0.172308	0.610707	0.746096	0.530891	0.180209	0.404868	1.66044	6.40661e-06	0.000341914	0.703471	0.0014977	0.0231737	0.338334	0.213373	0.544899	0.88127	2.94879e-06	1.6589e-05
BC049807	-0.179373	0.583901	0.96034	-0.268127	0.329968	0.958406	-0.691347	0.0169684	0.0773832	0.41271	0.391157	0.613756	0.376044	0.376805	0.590069	1.02147	0.0013033	0.0212184	0.692329	0.0582999	0.294301	0.0769279	0.796987	0.851143
BC050092	-0.972292	0.0912924	0.955693	-0.944035	0.0896634	0.758982	-1.10673	0.0263239	0.101704	-0.845816	0.115686	0.325594	-0.277172	0.532828	0.720234	0.342389	0.313856	0.598791	-0.0610099	0.908621	0.974246	-0.164533	0.578148	0.666734
BC052040	0.117609	0.737886	0.974136	-0.0467143	0.906551	0.996527	0.00845014	0.976756	0.986708	-0.0141858	0.972453	0.988297	0.0648598	0.863412	0.933772	0.49885	0.0342361	0.174058	0.340993	0.2524	0.585667	0.544462	0.00685295	0.0160207
BC053749	-0.209513	0.695113	0.971263	-0.483786	0.325555	0.956677	0.429717	0.270324	0.444014	0.427117	0.277874	0.507165	0.117209	0.756885	0.872555	0.281355	0.2431	0.524394	0.587338	0.0380269	0.238812	0.581542	0.00743177	0.0172046
BC055324	0.154346	0.691061	0.971177	0.243229	0.514112	0.975024	0.789908	0.0222641	0.091627	-1.04394	0.0282869	0.188354	-1.20162	0.00840945	0.057721	-0.59848	0.0225035	0.133841	-0.722853	0.0339105	0.225996	-1.52815	1.18057e-11	1.78787e-10
BC056474	-0.170543	0.606694	0.96167	-0.0768133	0.801231	0.996172	-0.153144	0.595953	0.736093	-0.25788	0.457898	0.671602	0.00372279	0.990832	0.997117	-0.352737	0.0732979	0.271844	0.143084	0.553173	0.814978	0.285106	0.123058	0.189905
BC057079	0.0340241	0.906511	0.991053	0.0254616	0.918797	0.996527	0.264303	0.340018	0.513936	-0.407411	0.251594	0.481454	-0.395808	0.217754	0.42354	-0.239511	0.230947	0.509585	-0.0660842	0.807514	0.936438	0.112768	0.541922	0.634935
BC057893	0.0241529	0.929787	0.993715	-0.00743819	0.999847	1	0.323841	0.259876	0.432511	-0.705701	0.124377	0.336989	-0.435259	0.242956	0.453893	0.288521	0.166683	0.429105	-0.194304	0.477589	0.772171	-0.773115	0.000203532	0.000737831
BC059842	0.412002	0.394875	0.955693	-0.536164	0.24673	0.93973	0.968276	0.0145169	0.070193	0.420191	0.285317	0.514847	0.444251	0.223633	0.430196	0.215711	0.411579	0.680509	0.261172	0.381259	0.696782	-0.267825	0.293255	0.38845
BC067068	-0.104597	0.816713	0.981006	-0.654521	0.0996889	0.786479	-0.257357	0.441363	0.606722	-0.109552	0.815417	0.905314	-0.747843	0.0468883	0.169668	0.0705691	0.786179	0.911453	-0.413351	0.225275	0.556221	0.40594	0.0622438	0.107084
BC068281	0.838382	0.147759	0.955693	0.579741	0.283836	0.948861	0.752812	0.196127	0.3612	-0.108263	0.807491	0.902235	0.47805	0.19859	0.401076	-0.162309	0.525351	0.764509	-0.0155146	0.961718	0.991938	-0.00582302	0.980084	0.986609
BC088983	-0.314743	0.451743	0.955693	-0.369363	0.390253	0.960134	-0.318521	0.391019	0.563276	-1.66713	0.00924852	0.130552	-1.39342	0.0044825	0.037516	-0.143442	0.604491	0.812718	-0.956254	0.00788691	0.110705	0.314882	0.144098	0.216255
Bcap29	-0.763074	0.0793887	0.955693	-0.434845	0.253467	0.93973	-1.46608	0.000238215	0.00507108	-0.357487	0.529691	0.722669	-1.54914	0.00174274	0.0195862	-0.00893688	0.992565	1	-0.308747	0.479056	0.772996	1.04332	0.00297503	0.00773968
Bcap31	0.391986	0.245417	0.955693	0.26219	0.376258	0.960134	0.868177	0.00399497	0.0315099	-1.41682	0.0376921	0.207583	-0.907303	0.138391	0.324211	-0.489873	0.0244741	0.14162	-0.633297	0.121493	0.423408	-0.0295147	0.871719	0.908212
Bcar1	-0.0177783	0.978529	1	-0.479853	0.15099	0.858132	0.318663	0.385305	0.558754	0.894538	0.0204196	0.170444	1.23964	0.00111744	0.0142732	0.13028	0.558535	0.787625	0.73742	0.011268	0.132289	-0.074029	0.730044	0.797051
Bcar3	-0.227707	0.528766	0.957503	-0.540999	0.0965567	0.77901	-0.218403	0.457795	0.621605	0.34269	0.322237	0.551617	-0.230161	0.486144	0.680943	-0.40565	0.0514229	0.221112	0.205721	0.420129	0.729198	-0.845865	4.85443e-06	2.59051e-05
Bcas2	-0.619153	0.0852226	0.955693	-0.341071	0.290084	0.949068	-0.64124	0.0658498	0.18	0.306299	0.369866	0.595078	0.882091	0.00257912	0.0252102	-0.0758585	0.697946	0.865328	-0.0387311	0.880675	0.963827	0.663738	0.000341368	0.00116673
Bcas3	-0.45074	0.479718	0.955693	-0.476479	0.398223	0.960134	0.275986	0.543483	0.693601	0.214425	0.609801	0.780027	-0.0553529	0.889004	0.946868	-0.0432715	0.880489	0.953128	0.0336541	0.921842	0.978411	0.0233114	0.9353	0.954457
Bcat1	0.311429	0.329911	0.955693	0.518651	0.0782302	0.727621	0.543544	0.067887	0.183667	-0.010613	0.973603	0.988945	0.42446	0.145984	0.333621	0.210729	0.280722	0.566046	-0.0159506	0.947745	0.986529	1.30905	2.00892e-12	3.41855e-11
Bcat2	0.391987	0.437676	0.955693	-0.196841	0.706806	0.992764	0.411365	0.424554	0.592014	0.156327	0.660398	0.811371	0.0292007	0.930684	0.967018	-0.181902	0.394414	0.668068	0.186223	0.477105	0.771744	2.18772	2.9891e-31	3.46875e-29
Bccip	0.155203	0.737233	0.974136	0.255195	0.58194	0.982804	-0.00748451	1	1	-0.355565	0.326685	0.555373	-0.302346	0.365139	0.579254	-0.146557	0.535382	0.770464	-0.184117	0.510601	0.791764	0.513874	0.0174788	0.0362657
Bcdin3d	0.211954	0.73591	0.974136	-0.462238	0.554037	0.980133	0.787079	0.15345	0.306839	-0.0340597	0.942234	0.974277	0.788416	0.0374795	0.149408	1.00844	0.000135612	0.00405211	0.151427	0.641625	0.856515	0.613235	0.00908654	0.0204519
Bckdhb	0.168912	0.648206	0.963151	0.0326347	0.90897	0.996527	-0.441564	0.253888	0.426326	-0.565317	0.262013	0.491059	0.128126	0.770652	0.880694	-0.147779	0.683594	0.856746	-0.349786	0.400174	0.71063	0.568401	0.0739594	0.124095
Bcl10	-0.677992	0.146518	0.955693	-0.486606	0.245375	0.93973	-1.05669	0.00650863	0.0427624	-0.0430614	0.910628	0.958253	-0.111788	0.75344	0.870821	0.406325	0.0891221	0.303226	0.0804131	0.778012	0.922957	0.837059	6.21528e-05	0.000256422
Bcl2	-0.0474571	0.903422	0.991053	-0.35748	0.27034	0.947959	-0.970997	0.00590811	0.0403303	0.976459	0.0278324	0.187175	0.716355	0.0560292	0.187264	0.726987	0.00750284	0.0683196	1.39683	0.000321095	0.017602	0.266038	0.235592	0.325832
Bcl2l1	0.125632	0.691385	0.971177	-7.26323e-05	0.983788	1	-0.16593	0.617036	0.750795	0.263809	0.401487	0.622567	0.563725	0.0783064	0.228954	0.239082	0.202521	0.476575	0.525478	0.0240301	0.190333	-0.56905	0.00095007	0.00286024
Bcl2l11	0.163982	0.694587	0.971263	0.769595	0.0362688	0.568714	-0.42089	0.228626	0.3982	-0.0288677	0.942456	0.974382	0.574753	0.104907	0.27336	-0.359647	0.151961	0.408434	0.267297	0.361767	0.681215	-1.64005	2.25962e-12	3.8096e-11
Bcl2l13	-0.0227628	0.957798	0.998784	-0.384105	0.22653	0.931834	0.0222766	0.942736	0.966169	-0.161175	0.611953	0.781783	-0.155336	0.599812	0.770614	-0.123182	0.533915	0.769788	-0.118098	0.640203	0.856505	-0.00557672	0.975368	0.982753
Bcl2l2	-0.309438	0.457099	0.955693	-0.252885	0.512558	0.975024	-0.478378	0.182818	0.344249	0.293256	0.389207	0.612361	-0.121269	0.707329	0.843008	0.0531512	0.800629	0.91769	0.0188386	0.942565	0.985366	0.319814	0.0810276	0.133883
Bcl3	-0.0706288	0.95238	0.998377	-1.34399	0.0938972	0.771906	0.371666	0.577682	0.721199	1.1736	0.00338711	0.0849331	1.44815	0.000108617	0.00271679	0.504503	0.0366782	0.181011	0.613931	0.0398568	0.244331	0.302462	0.194729	0.277549
Bcl6	-0.228498	0.508419	0.955693	-1.52555	1.06951e-05	0.00209288	-0.0160681	0.96837	0.982446	0.690537	0.0358513	0.203803	1.00864	0.00168117	0.0191312	0.673637	0.00104683	0.0184909	0.61149	0.0136661	0.146262	0.309709	0.0986172	0.157548
Bcl7a	-0.102394	0.77535	0.974201	-0.397788	0.208207	0.921058	-0.383135	0.220552	0.388683	0.79083	0.0212943	0.172092	0.77426	0.017504	0.0934668	0.0768669	0.718507	0.875444	0.545232	0.0316715	0.218954	-0.443965	0.0201136	0.0409661
Bcl7b	0.0822776	0.825664	0.981006	-0.3997	0.321958	0.956007	0.152899	0.657305	0.779791	0.642185	0.0651472	0.252463	0.202415	0.546044	0.729717	0.565805	0.00537666	0.0546426	0.598731	0.0195228	0.170634	0.967556	7.60574e-08	5.97679e-07
Bcl7c	0.143596	0.734872	0.974136	-0.0797798	0.86119	0.996527	-0.787245	0.0466213	0.144228	1.47039	0.000949258	0.0469829	0.953641	0.0211277	0.105375	0.0458112	0.855104	0.942351	0.498142	0.135512	0.446573	0.940199	0.000127136	0.000485023
Bcl9	0.0695674	0.824755	0.981006	-0.152163	0.62956	0.987954	0.260512	0.382538	0.555911	0.706044	0.0449396	0.220273	0.303319	0.365306	0.579427	0.105963	0.643984	0.833844	0.672762	0.0099797	0.126494	-0.154932	0.454209	0.552352
Bcl9l	0.799854	0.216715	0.955693	-0.677268	0.303142	0.955127	0.706129	0.223435	0.391758	1.80414	8.66396e-05	0.0154404	1.66727	6.91361e-05	0.00203034	0.207587	0.47654	0.731784	0.847561	0.0112548	0.132289	-0.302783	0.268332	0.361738
Bclaf1	-0.127533	0.636399	0.962838	-0.058953	0.808872	0.996172	-0.292837	0.216313	0.384677	-1.02708	0.0589374	0.242354	-1.38812	0.00661302	0.0489236	0.137543	0.687921	0.859386	-0.0100396	0.980535	0.996299	-0.379852	0.214993	0.301437
Bcor	0.188657	0.488521	0.955693	-0.429675	0.100205	0.787554	-0.36924	0.156411	0.310556	0.273194	0.373904	0.599063	-0.0635419	0.828974	0.914267	0.226698	0.240654	0.521716	0.521858	0.0248239	0.193247	-1.16413	4.53971e-11	6.22339e-10
Bcorl1	0.69902	0.245821	0.955693	0.335421	0.528945	0.97863	1.01309	0.0477447	0.146568	1.10957	0.00143307	0.057208	0.648092	0.0561313	0.18748	0.172564	0.46016	0.717562	0.472441	0.0707794	0.324921	-0.550459	0.00573416	0.0136939
Bcr	0.159233	0.595894	0.961274	0.178881	0.505893	0.974669	0.411957	0.130487	0.275397	0.645841	0.0591154	0.242496	0.692841	0.0275161	0.123331	-0.0699729	0.752793	0.893327	0.295281	0.251799	0.584984	-0.834504	3.56954e-05	0.000155632
Bdh2	0.16536	0.688819	0.971177	0.0959714	0.799719	0.996172	-0.301676	0.433962	0.600141	-0.297498	0.512351	0.710175	0.139611	0.717087	0.849238	0.0251631	0.931262	0.974756	0.0527341	0.878781	0.963299	0.394139	0.0838648	0.137773
Bdnf	-0.409748	0.205227	0.955693	-1.36514	4.05772e-06	0.000987708	-1.02692	0.000447863	0.00769306	0.397158	0.269533	0.498013	1.21461	0.000828181	0.0116085	0.527861	0.0297425	0.159414	0.334668	0.231281	0.562972	0.44282	0.0514446	0.0915998
Bdp1	-0.330327	0.287337	0.955693	0.0956524	0.705977	0.992764	-0.67174	0.0158782	0.0746066	-0.383644	0.403793	0.623333	0.228375	0.595524	0.767377	0.0585618	0.825928	0.928076	-0.0151215	0.96695	0.993326	-0.396843	0.0854895	0.140004
Becn1	0.206279	0.497882	0.955693	-0.0438794	0.892313	0.996527	0.355795	0.196271	0.3614	0.279713	0.401082	0.622246	0.44177	0.170154	0.363946	0.0558033	0.788878	0.912821	0.0628206	0.802308	0.935268	0.526952	0.00472135	0.0115715
Begain	0.562531	0.352083	0.955693	0.204397	0.70012	0.991514	0.0388589	0.958455	0.976358	1.46621	0.000801866	0.0426865	1.16028	0.00401767	0.03478	0.789313	0.000662101	0.013242	1.03054	0.000793437	0.0296573	0.967164	3.66365e-05	0.000158695
Bend3	0.261349	0.430034	0.955693	0.134659	0.650417	0.990305	-0.697539	0.0311012	0.111951	0.439218	0.182791	0.408384	0.691048	0.029758	0.128621	-0.319329	0.112688	0.345083	0.262839	0.278369	0.609987	-0.927003	4.74705e-07	3.23603e-06
Bend6	-0.589363	0.261472	0.955693	-0.0343848	0.956668	0.998322	-0.741675	0.116493	0.255293	-1.11848	0.065073	0.252463	-0.127069	0.786432	0.888306	0.0180166	0.967831	0.989233	-0.136753	0.778924	0.923348	1.01247	3.91518e-05	0.000168275
Bet1	-0.571955	0.141198	0.955693	-0.205953	0.57176	0.981301	-0.262003	0.492127	0.649316	0.251827	0.54576	0.735065	0.315656	0.377107	0.59028	0.0305596	0.902951	0.96269	-0.0112614	0.97532	0.995601	1.92293	1.17799e-21	6.02887e-20
Bfar	0.0765123	0.811854	0.980671	0.216179	0.480242	0.970402	0.385021	0.188196	0.351541	-0.779899	0.0747239	0.266814	-0.421168	0.273687	0.48662	-0.249058	0.292992	0.578106	-0.480617	0.101654	0.388375	0.521046	0.0170493	0.0354556
Bglap-rs1	0.313806	0.591312	0.96034	0.443721	0.427554	0.962959	0.749096	0.12386	0.266233	-0.590103	0.387282	0.610206	1.5038	0.00164472	0.0189323	1.04125	0.0135039	0.0986033	0.187112	0.710835	0.891783	1.1645	0.000916407	0.00276892
Bgn	0.349338	0.289924	0.955693	0.148612	0.607488	0.986881	0.472431	0.122148	0.263518	-0.689283	0.072477	0.263431	-0.728073	0.0375901	0.149601	-0.523336	0.0118073	0.09116	-0.238343	0.417669	0.727209	-0.723551	0.000112536	0.000436327
Bhlhb9	-0.146655	0.676108	0.968202	-0.214806	0.500037	0.974559	-0.333934	0.256269	0.428906	0.797293	0.0556069	0.235951	0.330363	0.391063	0.602843	0.50599	0.0599545	0.242489	0.264658	0.410199	0.720356	0.513994	0.0413036	0.0760444
Bhlhe40	0.00986284	0.961435	0.998784	-1.33699	0.000432679	0.0378784	-0.0109127	0.986645	0.993494	1.46379	2.93674e-06	0.00191348	2.02891	1.00034e-10	3.34845e-08	1.02848	9.99115e-08	1.08639e-05	1.17762	7.34376e-07	0.000349004	-0.568473	0.0014818	0.00423979
Bhlhe41	-0.485916	0.376093	0.955693	-0.950987	0.0672124	0.690813	0.349656	0.414374	0.583198	1.7101	0.000381821	0.0312545	2.72647	2.11943e-10	6.60998e-08	1.13624	8.04666e-05	0.00272223	0.729589	0.0370485	0.235656	0.282281	0.259172	0.351527
Bicc1	0.109358	0.711526	0.972787	0.236896	0.392685	0.960134	0.0590595	0.819575	0.887517	0.606142	0.0489414	0.226729	0.847485	0.00365901	0.0327212	0.511473	0.00746428	0.0680928	0.667009	0.00497619	0.08607	-1.16573	1.28482e-10	1.619e-09
Bicd2	0.34184	0.307286	0.955693	0.443441	0.148725	0.857166	0.52624	0.0791989	0.201904	0.669793	0.0530434	0.23209	0.776229	0.0161293	0.0885935	-0.145194	0.475807	0.731405	0.0501943	0.851376	0.953297	0.130586	0.449466	0.547902
Bid	-0.175098	0.607819	0.96167	-0.0440478	0.895122	0.996527	0.175892	0.524643	0.67709	-0.264338	0.471337	0.680941	0.0131519	0.969726	0.987979	0.0509414	0.818663	0.924035	0.0761517	0.772863	0.921997	0.604783	0.00131475	0.00381653
Bin1	0.0732077	0.806763	0.979881	0.205895	0.466552	0.967931	0.703895	0.016433	0.0759267	0.874003	0.0130538	0.146873	0.629524	0.0462363	0.168408	0.387167	0.0698515	0.265159	0.425465	0.0947125	0.374349	-0.14729	0.456436	0.554569
Bin3	0.286223	0.515252	0.956456	-0.224389	0.647053	0.989904	0.770934	0.0432008	0.13757	-0.208778	0.613303	0.782685	-0.568049	0.131484	0.314623	0.570556	0.0276533	0.153206	0.238267	0.439723	0.745066	0.66351	0.00474143	0.0116179
Birc2	0.0546495	0.886928	0.98773	-0.0768369	0.917716	0.996527	-0.029317	0.976418	0.986708	-1.74438	0.00453244	0.0961843	-0.711535	0.243181	0.454145	0.284956	0.326083	0.610794	-0.57243	0.144087	0.458831	0.156757	0.526237	0.620286
Birc3	-0.172037	0.72821	0.973017	0.268333	0.503275	0.974559	0.372417	0.295718	0.470172	-0.497173	0.281047	0.510716	-0.401634	0.319305	0.534137	0.535426	0.0243714	0.141246	0.19636	0.554464	0.815557	0.357532	0.0818433	0.134985
Birc5	0.0464664	0.845234	0.983037	-0.0742296	0.754084	0.9929	-0.355287	0.134065	0.279675	-0.470389	0.141853	0.356361	-0.79706	0.00958832	0.0627485	-0.610547	0.00462524	0.0496343	-0.495317	0.0511993	0.276595	-0.401464	0.0535791	0.0946573
Birc6	0.116929	0.633857	0.962838	0.562796	0.0129232	0.361271	0.516553	0.0218978	0.0906804	-0.431963	0.21944	0.448865	-0.092188	0.772065	0.881402	-0.277686	0.206097	0.479663	-0.0225329	0.932503	0.982319	-1.83113	4.39323e-19	1.77508e-17
Bivm	0.120289	0.702967	0.972787	0.0803005	0.777941	0.995877	0.321082	0.261707	0.434083	-0.600559	0.189342	0.41677	-0.123932	0.758104	0.873355	0.0902999	0.741197	0.887693	-0.307217	0.364688	0.682779	-0.600653	0.0243477	0.0483082
Blcap	0.126454	0.736137	0.974136	0.40575	0.248999	0.93973	0.770614	0.0184702	0.0812275	0.328536	0.330599	0.558743	0.0682933	0.823275	0.911175	-0.0631805	0.760879	0.897948	-0.130499	0.598638	0.837691	0.221981	0.228921	0.318073
Blm	-0.305344	0.29969	0.955693	-0.265725	0.293657	0.949068	-0.457402	0.0858391	0.211224	-0.404078	0.327631	0.555892	-0.68153	0.0830878	0.236919	0.334525	0.211949	0.486489	0.352243	0.237443	0.570321	-1.11273	9.99163e-06	4.94871e-05
Blmh	-0.158958	0.616758	0.962615	0.387377	0.133864	0.846325	0.24873	0.334788	0.509729	-0.543045	0.146788	0.362593	-0.710489	0.0469379	0.169747	-0.129538	0.557232	0.786922	-0.252542	0.334072	0.656823	-0.226069	0.261053	0.353645
Bloc1s1	-0.0482903	0.88149	0.987001	-0.0147365	0.964237	0.998839	-0.425733	0.124429	0.267053	0.423745	0.21176	0.440744	-0.0149727	0.963165	0.984553	-0.084777	0.659339	0.842529	0.187026	0.517573	0.795174	0.225669	0.244255	0.335305
Bloc1s2	0.0804954	0.803422	0.979508	0.64654	0.0358301	0.566695	0.42165	0.156932	0.311236	-0.0396344	0.912915	0.959242	0.0567975	0.861008	0.932378	0.0234069	0.909954	0.964869	-0.389307	0.13224	0.441474	0.617852	0.000621541	0.00196608
Bloc1s3	-0.228076	0.694825	0.971263	-0.314719	0.540231	0.979378	-0.4204	0.324574	0.498884	0.035173	0.937719	0.972103	-0.0437343	0.912413	0.95811	-0.112352	0.681001	0.855646	-0.270536	0.396232	0.707785	0.653973	0.00276492	0.00728648
Blvra	-0.0548985	0.878783	0.987001	0.0557049	0.833389	0.996172	0.000152746	0.997876	1	-0.720828	0.128475	0.342371	-0.745699	0.0764114	0.225684	-0.301482	0.322086	0.607525	-0.695702	0.0494566	0.271436	-0.251984	0.343672	0.441536
Blvrb	0.304258	0.382909	0.955693	0.395072	0.200521	0.915044	2.12799	6.68347e-14	9.52872e-11	0.509997	0.207796	0.436731	0.632762	0.100958	0.266693	-0.175949	0.501604	0.748492	-0.0409767	0.902544	0.971809	0.473837	0.0646424	0.1106
Blzf1	-0.225052	0.551485	0.957503	0.0103574	0.964817	0.998839	-0.339291	0.286327	0.460598	-0.843659	0.167478	0.38961	-0.0089585	0.986696	0.995373	0.253775	0.410685	0.679482	-0.0966563	0.816361	0.940035	0.732724	0.0032094	0.0082722
Bmf	-0.368708	0.594146	0.961274	-0.332737	0.61396	0.986881	-0.411223	0.46306	0.626113	0.0453536	0.935782	0.970801	0.253646	0.622736	0.787551	-0.447014	0.27699	0.561977	-0.104357	0.823415	0.942364	-3.13016	8.64128e-14	1.78551e-12
Bmi1	-0.497747	0.156166	0.955693	-0.377315	0.226412	0.931834	-1.33679	8.55393e-05	0.00251824	0.235978	0.472061	0.681357	0.638325	0.039992	0.154906	0.359485	0.0938629	0.312147	0.633699	0.00887376	0.118713	0.209209	0.25337	0.345203
Bmp1	0.148859	0.677306	0.968419	0.168315	0.613763	0.986881	0.622744	0.0510214	0.153371	0.461718	0.188105	0.415238	0.57941	0.0870488	0.243899	0.191324	0.365047	0.644248	0.38167	0.138541	0.450988	-0.639777	0.000775064	0.00239034
Bmp2k	-0.181084	0.561196	0.957503	-0.147939	0.570273	0.981301	-0.717808	0.00507804	0.0366972	0.201362	0.566386	0.749772	0.576704	0.0690397	0.212397	0.346689	0.102402	0.327344	0.240336	0.380642	0.69639	0.12712	0.521221	0.616471
Bmper	-0.242566	0.47111	0.955693	-0.422251	0.16348	0.87341	-1.35872	8.59113e-06	0.000456061	-0.359763	0.313964	0.544154	-0.62583	0.0619441	0.199483	-0.448517	0.0308229	0.162844	-0.456207	0.0780746	0.339662	-2.38877	2.8275e-31	3.31982e-29
Bmpr1a	-0.340535	0.259527	0.955693	-0.135691	0.619808	0.986881	-0.54724	0.037592	0.125642	-1.10111	0.0561444	0.236722	-0.886541	0.133952	0.317783	-0.385784	0.135854	0.382893	-0.21687	0.424107	0.733424	-1.02481	3.42212e-07	2.40512e-06
Bmpr2	0.0767156	0.760655	0.974198	0.448191	0.0509688	0.650099	-0.387969	0.108031	0.243978	-0.557066	0.27861	0.507952	0.156462	0.710808	0.844608	0.0885579	0.690286	0.861025	-0.0210487	0.94717	0.986529	-0.985178	1.06799e-06	6.65329e-06
Bms1	0.141694	0.573794	0.958782	0.372811	0.0931355	0.768802	-0.234969	0.313648	0.488177	0.34031	0.307743	0.537688	0.433469	0.164324	0.358178	0.243113	0.290485	0.576034	0.296214	0.258378	0.592376	-0.215336	0.318743	0.415987
Bnc1	-0.235556	0.549239	0.957503	-0.714022	0.0563293	0.670959	-1.32795	0.000209872	0.00465449	-0.104897	0.774617	0.882159	-0.746177	0.028076	0.124699	0.28519	0.169798	0.433607	0.467293	0.0667231	0.313374	-2.00754	5.72492e-23	3.2836e-21
Bnc2	0.276064	0.459109	0.955693	0.132901	0.695198	0.991213	-0.293327	0.406949	0.577635	0.444683	0.169627	0.392142	0.816117	0.00664183	0.0490277	0.77016	0.000105335	0.0033802	0.681274	0.0067543	0.1019	-0.790203	1.60865e-05	7.57636e-05
Bnip1	0.351076	0.396451	0.955693	-0.188803	0.681614	0.991186	0.574179	0.098455	0.230145	-0.364096	0.3692	0.594651	-0.677461	0.0706072	0.214966	0.211786	0.415022	0.683194	-0.183491	0.551075	0.813329	0.747341	0.00134798	0.00389487
Bnip2	0.0635375	0.801282	0.979159	0.057382	0.797478	0.996172	-0.0983486	0.681846	0.797659	-0.423214	0.31846	0.54816	-0.59343	0.0702564	0.214684	-0.527632	0.0226526	0.134089	-0.524104	0.0715428	0.32654	-0.294035	0.17433	0.252294
Bnip3	-0.0943125	0.809286	0.979881	-0.52308	0.128107	0.835625	-0.980416	0.0022474	0.0218181	-0.571511	0.185371	0.412302	-0.564427	0.142393	0.329166	-0.748119	0.0100672	0.0828964	-0.972369	0.00211014	0.0518446	-0.416996	0.0530826	0.0939633
Bnip3l	-0.0693771	0.817662	0.981006	-0.079697	0.763266	0.994278	0.0147987	0.948741	0.970823	-0.422992	0.235896	0.465768	-0.262608	0.388041	0.600197	-0.285655	0.163359	0.424454	-0.462082	0.0713957	0.326399	0.169841	0.335048	0.43274
Bod1	0.325242	0.299476	0.955693	0.189516	0.500717	0.974559	0.814753	0.00294921	0.0259094	-0.731966	0.040792	0.214153	-0.737269	0.0245785	0.115215	-0.385867	0.0426759	0.19782	-0.4534	0.0634774	0.30501	-0.0166376	0.923672	0.946918
Bod1l	-0.328838	0.315953	0.955693	0.0346049	0.891437	0.996527	-0.311165	0.316754	0.491176	-0.684286	0.106435	0.313564	-0.172845	0.680847	0.826206	0.199013	0.337365	0.620278	0.0369172	0.904983	0.972304	-0.910891	5.31571e-07	3.58869e-06
Bok	0.812423	0.156397	0.955693	0.131117	0.790478	0.996172	0.29641	0.560022	0.706398	0.40084	0.315621	0.545626	-0.0567434	0.873518	0.938902	-0.728152	0.00182542	0.0269728	-0.394426	0.185603	0.515764	-1.03856	8.94529e-07	5.67835e-06
Bola1	-0.0299067	0.955576	0.998784	-0.205007	0.539032	0.979378	-0.824827	0.0160238	0.0750573	0.922442	0.0648936	0.252294	0.987106	0.0265467	0.120977	-0.466716	0.0857793	0.297774	-0.231368	0.563687	0.820656	0.643454	0.00652844	0.0153303
Bola2	0.291712	0.376471	0.955693	0.435406	0.0992027	0.785749	-0.211633	0.48123	0.640791	0.662051	0.0668959	0.255109	0.850058	0.0161373	0.0885935	-0.108023	0.59361	0.805233	-0.336158	0.217941	0.550003	0.720748	0.000334428	0.00114579
Bola3	-0.751542	0.0910711	0.955693	-0.755932	0.0581018	0.676916	-1.54673	0.000207692	0.00461737	-0.386161	0.369939	0.595098	-0.217361	0.629473	0.792818	-0.0781601	0.773053	0.903382	0.13651	0.755705	0.914062	0.389048	0.042832	0.078376
Bop1	0.587653	0.208538	0.955693	0.162075	0.699989	0.991514	0.596326	0.181099	0.342113	-0.19948	0.535318	0.726868	-0.398008	0.19648	0.399154	-0.319424	0.110935	0.341989	-0.244068	0.327499	0.653165	-0.157158	0.405949	0.50541
Bpgm	0.0539901	0.870949	0.986354	0.0188243	0.938871	0.996908	1.08179	0.000495092	0.00809157	-0.528144	0.161623	0.38284	-0.882312	0.0126103	0.0755609	-0.479189	0.0301612	0.161053	-0.301761	0.27785	0.609438	-0.177177	0.348552	0.446827
Bphl	-0.87268	0.0965535	0.955693	-0.604483	0.242371	0.93973	-1.51612	0.000489238	0.00804382	-0.158265	0.717045	0.84768	-0.0125997	0.97464	0.989513	0.0673738	0.80024	0.917598	-0.464663	0.153944	0.474353	1.10353	3.27178e-07	2.30759e-06
Bpil2	-0.124388	0.84283	0.98262	0.258123	0.641126	0.989904	-0.514315	0.244431	0.416142	-0.831412	0.175845	0.400045	-0.207398	0.70817	0.843493	0.0954215	0.852412	0.941152	-0.315172	0.516672	0.794957	-1.3354	0.00267941	0.00710238
Bpnt1	-0.6403	0.163326	0.955693	-0.0186503	0.977351	1	-0.42106	0.275374	0.448838	0.0596019	0.865503	0.933505	1.19447	0.000101899	0.00264142	-0.268267	0.203044	0.476958	-0.387573	0.134787	0.445797	0.603202	0.000878212	0.00266562
Bptf	-0.128034	0.644965	0.963151	0.0297033	0.892357	0.996527	-0.158103	0.514892	0.669877	0.486894	0.123161	0.335374	0.69566	0.0161018	0.0885935	0.245749	0.191611	0.463919	0.39218	0.0938104	0.372554	-0.445224	0.0106197	0.0234998
Braf	0.0423632	0.870251	0.986354	0.168761	0.504154	0.974559	0.160691	0.529514	0.681086	-0.683247	0.12266	0.334557	-0.579698	0.185825	0.385077	0.00631309	0.982051	0.99572	-0.20055	0.514886	0.794213	-0.62384	0.00112388	0.00331844
Brap	-0.0397693	0.896089	0.98914	0.115863	0.614728	0.986881	0.155228	0.498475	0.654995	-0.194889	0.54089	0.73115	-0.179244	0.548328	0.731593	0.0555184	0.770192	0.902066	-0.13491	0.586951	0.83089	-0.433895	0.0167674	0.0349496
Brca1	-0.255198	0.459688	0.955693	0.255444	0.340919	0.960134	-0.203675	0.467154	0.629431	-0.432053	0.340276	0.567601	0.399588	0.289856	0.503965	0.160692	0.521535	0.762402	-0.0125594	0.967712	0.993489	-1.28217	2.22714e-08	1.94291e-07
Brca2	0.0303933	0.898181	0.989605	-0.172253	0.485147	0.972438	-0.835449	0.000965651	0.0124834	-0.860849	0.0900456	0.2913	-1.10674	0.0215835	0.106635	0.590236	0.0156909	0.107551	0.0927184	0.776305	0.922434	-1.31865	2.30124e-09	2.37994e-08
Brcc3	-0.547344	0.123786	0.955693	-0.247297	0.431878	0.963272	-0.608749	0.0490041	0.14924	-1.62408	0.00944873	0.131518	-0.962162	0.0857904	0.241861	-0.369812	0.289735	0.575519	-0.731597	0.0760554	0.335356	-0.323733	0.245397	0.33641
Brd1	0.315747	0.384229	0.955693	0.517541	0.122474	0.830204	0.427899	0.194527	0.359316	1.0515	0.001655	0.0609446	0.82979	0.00679865	0.049671	0.377411	0.0510674	0.220152	0.50579	0.0310486	0.216197	0.101926	0.559103	0.649877
Brd2	0.377541	0.218	0.955693	0.500975	0.0750055	0.717007	0.776661	0.00597653	0.0406861	0.771231	0.0168195	0.15941	0.731725	0.0119209	0.0727101	0.563511	0.00326427	0.0393572	0.895345	0.000200271	0.0138341	0.293501	0.0979547	0.15669
Brd3	-0.0139618	0.970168	0.999344	0.0979158	0.662283	0.990689	-0.0456771	0.85412	0.911594	1.01586	0.00445389	0.0956144	1.14956	0.000722343	0.0105123	0.130292	0.505723	0.751749	0.624768	0.0142632	0.148648	-0.112211	0.529334	0.623113
Brd4	0.190132	0.490133	0.955693	0.305338	0.222275	0.929887	0.586724	0.0210672	0.0881922	1.5188	0.0004448	0.0326646	1.46728	0.000123387	0.00297439	0.495088	0.0615365	0.246209	1.10469	0.000295898	0.017169	0.373481	0.134811	0.204315
Brd7	-0.511072	0.134421	0.955693	-0.30431	0.314665	0.955127	-0.992855	0.00144198	0.0162243	0.245259	0.529912	0.722771	0.609507	0.103726	0.271417	0.618554	0.0398083	0.189817	0.403432	0.233544	0.566085	0.553463	0.0536621	0.0947704
Brd8	-0.263344	0.38467	0.955693	-0.423261	0.117411	0.822555	0.165807	0.523699	0.676309	-0.729582	0.0313719	0.19512	-1.13332	0.000345413	0.00630206	0.0116912	0.951901	0.982629	0.30498	0.211197	0.544067	0.103489	0.554705	0.645818
Brd9	-0.0444307	0.899569	0.989627	-0.0829855	0.776943	0.995877	-0.136631	0.621513	0.754311	-0.0383119	0.913079	0.959242	-0.0309881	0.92578	0.96513	0.285156	0.166162	0.428649	0.313412	0.218482	0.550542	0.138384	0.447175	0.545842
Bre	0.708344	0.0947125	0.955693	0.394142	0.318042	0.955127	0.499935	0.186765	0.349782	-0.808696	0.0464597	0.222371	-0.403911	0.246756	0.458423	-0.491404	0.0774121	0.279411	-0.866094	0.00669132	0.1019	0.120407	0.55438	0.645515
Brf1	0.118436	0.694123	0.971263	0.345195	0.221541	0.929887	0.314173	0.249334	0.421192	0.178744	0.596672	0.771845	-0.108589	0.734949	0.858674	-0.0173774	0.937891	0.977501	-0.114002	0.659359	0.86425	-0.0904603	0.631776	0.715041
Brf2	-0.804269	0.0948594	0.955693	-1.11905	0.0156436	0.39625	-0.393906	0.338589	0.512997	0.0433348	0.905695	0.956086	0.313322	0.355999	0.57065	0.598058	0.00415237	0.0464061	0.182267	0.502329	0.787327	1.37499	1.18732e-13	2.41332e-12
Bri3	-0.0930908	0.748581	0.974136	-0.224552	0.389953	0.960134	-0.260319	0.297504	0.471808	0.123989	0.699977	0.837031	-0.653368	0.0279169	0.124187	-0.271886	0.178996	0.447266	-0.299282	0.240085	0.572444	1.10944	1.8616e-06	1.10064e-05
Bri3bp	-0.49945	0.186365	0.955693	-0.310196	0.380202	0.960134	-0.730792	0.0299155	0.109281	0.407641	0.189102	0.416425	0.827794	0.00858648	0.0583741	0.13675	0.488288	0.740113	0.330091	0.169559	0.495641	1.05973	1.92028e-08	1.69447e-07
Brip1	-0.380849	0.274673	0.955693	-0.308805	0.309178	0.955127	-0.487401	0.100685	0.233349	-0.914626	0.103299	0.309353	-1.20105	0.0133481	0.0783153	-0.381067	0.197439	0.470973	-0.400837	0.271476	0.604875	-1.13737	2.83798e-08	2.41997e-07
Brms1	0.372124	0.394398	0.955693	-0.113764	0.803123	0.996172	0.840403	0.0223279	0.0917761	0.657494	0.0804674	0.277397	0.301806	0.402317	0.611972	0.037474	0.867478	0.947306	0.246758	0.392413	0.704621	0.15011	0.44892	0.547436
Brms1l	-0.285147	0.363286	0.955693	-0.215472	0.421568	0.962619	-0.671576	0.0186586	0.0817801	0.440103	0.226798	0.455665	0.0248826	0.942084	0.972687	-0.0871219	0.700037	0.866365	-0.106015	0.696734	0.88477	-0.107171	0.612006	0.697559
Brp16	0.300397	0.442408	0.955693	-0.135827	0.754944	0.9929	-0.0253587	0.958949	0.976404	0.238001	0.516354	0.712952	-0.358425	0.284928	0.499663	0.299756	0.157933	0.417713	-0.214745	0.441466	0.745739	1.05921	5.41244e-09	5.25961e-08
Brp44	-0.796762	0.0934641	0.955693	-0.638235	0.137035	0.846325	-1.37844	0.00126915	0.0149662	0.875317	0.0406524	0.214153	-0.0114321	0.97584	0.990334	-0.302249	0.1609	0.421023	-0.181399	0.585558	0.830393	0.869699	7.91774e-05	0.000319527
Brp44l	-0.825335	0.0758298	0.955693	-0.85018	0.0493822	0.646343	-1.14047	0.00614263	0.0412554	0.257741	0.459708	0.672633	-0.598382	0.0784243	0.228965	-0.128031	0.540774	0.773941	-0.441865	0.119748	0.419944	0.596075	0.00133503	0.00386527
Brpf1	-0.0955065	0.752766	0.974198	0.294623	0.226519	0.931834	0.326713	0.177194	0.337619	0.378627	0.233679	0.462783	0.167972	0.59232	0.764802	0.137178	0.478481	0.732573	0.38047	0.11053	0.402882	0.0978571	0.574114	0.663539
Brpf3	0.30174	0.384747	0.955693	-0.00356615	0.990089	1	0.237927	0.441748	0.607049	1.12348	0.00109768	0.0502596	0.626307	0.0477232	0.1712	0.419395	0.037374	0.183019	0.725314	0.00443099	0.080818	0.199711	0.25882	0.351252
Brunol4	-0.109613	0.816765	0.981006	0.271081	0.458421	0.967931	-0.0827009	0.828563	0.894436	0.796791	0.0999627	0.304615	0.949761	0.0217928	0.107244	0.220342	0.445147	0.706066	0.179082	0.595887	0.836421	0.142556	0.576462	0.665174
Brunol5	0.443041	0.399719	0.955693	0.0359212	0.952751	0.997921	0.572194	0.182466	0.343846	0.796269	0.0738768	0.265117	0.525406	0.207188	0.410265	0.235973	0.43497	0.698809	0.771012	0.0195373	0.170634	-1.35467	1.5983e-06	9.62646e-06
Brwd1	0.136423	0.594115	0.961274	0.19247	0.40592	0.960673	-0.0880319	0.719146	0.822517	-0.812641	0.119516	0.33042	-0.17711	0.71483	0.847644	0.526808	0.00829007	0.0730229	0.00362112	0.990706	1	0.426319	0.0169979	0.0353636
Brwd2	0.0890803	0.77367	0.974201	-0.124845	0.69935	0.991307	0.105311	0.703549	0.811889	-0.697977	0.0528879	0.23209	-0.91331	0.00582077	0.0450669	0.00284856	0.990201	0.999111	-0.212283	0.404086	0.714651	-0.21213	0.237088	0.327391
Brwd3	-0.364167	0.340901	0.955693	-0.203706	0.563231	0.980133	-0.171771	0.596281	0.736131	-0.458321	0.330291	0.5586	-0.846606	0.0473487	0.170346	-0.372886	0.187417	0.458436	-0.0817183	0.822089	0.942066	-1.08694	2.29366e-05	0.000104191
Bscl2	0.345119	0.490254	0.955693	0.485275	0.304563	0.955127	0.662186	0.112467	0.250485	0.25409	0.523268	0.718133	0.191856	0.612949	0.780359	-0.430741	0.0770817	0.278521	0.253869	0.385725	0.700035	-0.21779	0.312244	0.408681
Bsdc1	-0.0117202	1	1	-0.296778	0.506445	0.974772	1.72238	4.2609e-07	4.29534e-05	0.438362	0.205148	0.433307	0.531111	0.11082	0.282733	0.360668	0.0749684	0.274161	0.502078	0.0563802	0.289293	0.85881	1.19966e-06	7.39506e-06
Bsg	0.465228	0.22812	0.955693	0.184157	0.577795	0.981301	0.888789	0.0103155	0.0570984	0.259665	0.461209	0.67348	0.324502	0.327311	0.542736	-0.338603	0.10494	0.331634	0.0361119	0.895656	0.96986	0.00788888	0.968685	0.978093
Bst2	-0.323573	0.600846	0.96167	-0.716685	0.220872	0.929887	0.399292	0.440995	0.606299	0.510075	0.304766	0.534893	1.16368	0.0067711	0.0495422	-0.607338	0.0381923	0.185118	-0.652444	0.08693	0.357905	0.653745	0.0088736	0.020054
Btaf1	0.0948387	0.717717	0.972971	0.573364	0.0165708	0.405256	0.0294393	0.898373	0.939733	-1.23595	0.0442045	0.219305	-0.889518	0.0979297	0.262021	0.192982	0.461133	0.718406	-0.849563	0.0184708	0.166596	-0.512944	0.00604991	0.0143314
Btbd1	-0.226359	0.435231	0.955693	-0.123597	0.636252	0.989904	-0.882073	0.000986767	0.0126743	-0.574522	0.126776	0.340082	-0.389222	0.311834	0.527048	-0.16196	0.494831	0.743513	-0.514023	0.0878434	0.359504	-0.249393	0.228615	0.317768
Btbd10	-0.340892	0.44801	0.955693	-0.506481	0.228124	0.931834	-0.361248	0.337825	0.512541	-0.655243	0.11472	0.324613	-0.608606	0.11858	0.295122	0.0853252	0.709802	0.871018	-0.293828	0.34199	0.663374	0.200668	0.285486	0.380445
Btbd11	-0.201244	0.70721	0.972787	-0.416644	0.427568	0.962959	0.580609	0.171029	0.329895	0.607451	0.148281	0.365124	-0.211625	0.605681	0.774648	0.16093	0.535219	0.770464	0.104496	0.756888	0.914667	-0.677186	0.003436	0.00877688
Btbd12	-0.0915326	0.765192	0.974201	-0.0817662	0.750763	0.9929	-0.210581	0.391328	0.563584	0.248852	0.433421	0.650867	0.623589	0.0355428	0.144431	0.229911	0.244771	0.526695	0.256514	0.288692	0.619068	-0.561286	0.00249931	0.00669434
Btbd2	0.931346	0.152042	0.955693	-0.213687	0.75817	0.993133	1.11589	0.0280755	0.105611	0.853852	0.032274	0.197226	1.04895	0.00589015	0.0453383	0.0776461	0.777619	0.906299	0.310638	0.330826	0.655365	0.18389	0.457616	0.555868
Btbd3	0.0393852	0.884609	0.987542	-0.0275495	0.933932	0.996527	0.154721	0.55333	0.701625	-0.336132	0.374344	0.599446	-0.0758107	0.816775	0.906922	0.132092	0.53613	0.771074	-0.321454	0.24313	0.577173	-0.454222	0.0243719	0.0483465
Btbd6	0.111742	0.832758	0.981006	-1.08228	0.0361598	0.568714	-0.413063	0.306498	0.481182	0.168704	0.699234	0.836432	-0.430223	0.262313	0.475772	0.0822115	0.75372	0.894001	-0.175307	0.576216	0.827707	-0.42697	0.0612344	0.105675
Btbd7	0.0379908	0.888314	0.988226	-0.00227072	0.997349	1	0.120869	0.621145	0.754048	-0.249555	0.512247	0.710156	-0.202776	0.548956	0.731791	-0.0844453	0.681763	0.855848	0.0259688	0.928796	0.981442	-0.654071	0.000778192	0.00239925
Btbd9	-0.0227506	0.969793	0.999314	-0.224363	0.557859	0.980133	-0.281597	0.420133	0.588069	0.0954454	0.793094	0.893696	0.0733368	0.828222	0.914104	0.119629	0.589368	0.802063	0.0577891	0.830936	0.945473	-0.188668	0.352996	0.451538
Btc	-1.5105	0.100143	0.955693	-1.41752	0.105097	0.806823	-1.13454	0.130144	0.274945	-0.464225	0.487252	0.692603	-0.610687	0.296875	0.512065	0.108946	0.828062	0.929282	-0.00323783	1	1	-0.785662	0.0763508	0.1274
Btf3	0.0436624	0.854886	0.984737	0.167301	0.447278	0.966629	-0.199769	0.379065	0.552779	-0.871996	0.0495575	0.227238	-0.674119	0.0733	0.219746	-0.311852	0.173689	0.439997	-0.788067	0.00945216	0.12331	0.225676	0.292988	0.388264
Btf3l4	-0.683732	0.0786021	0.955693	-0.634908	0.067923	0.69454	-1.43215	0.000149939	0.00373474	-1.21769	0.0181193	0.16354	-1.82836	0.000120547	0.00292772	0.183114	0.543098	0.775189	-0.362982	0.277054	0.608483	0.70339	0.00895867	0.0202005
Btg1	-0.0905603	0.752071	0.974198	-0.469146	0.0611678	0.68628	-0.171417	0.484162	0.642887	-0.636859	0.0409697	0.214521	-0.626879	0.0336541	0.139823	0.0610034	0.76355	0.898892	-0.424031	0.0765227	0.33643	0.481953	0.00697285	0.0162591
Btrc	0.241298	0.482223	0.955693	-0.160795	0.63815	0.989904	0.553983	0.0572425	0.164303	0.177574	0.601961	0.775171	0.301421	0.340704	0.555502	0.104284	0.606976	0.814243	-0.0206611	0.936666	0.983415	-0.434378	0.0181474	0.0374972
Bub1	-0.313692	0.296542	0.955693	-0.0819523	0.774516	0.995877	-0.0913692	0.756074	0.847137	-1.28516	0.0138339	0.150723	-1.60179	0.00115689	0.0146706	-0.50331	0.171208	0.43577	-0.706226	0.075537	0.334538	-1.22062	0.000522492	0.00168844
Bub1b	0.00454912	0.974255	1	-0.179505	0.50083	0.974559	0.268177	0.279647	0.45335	-0.0740771	0.819789	0.906542	-0.447593	0.137957	0.323499	-0.493708	0.0167798	0.111791	-0.237385	0.341811	0.663285	-0.536975	0.00499071	0.0121452
Bub3	0.207706	0.479683	0.955693	-0.0234235	0.941446	0.997148	0.396218	0.112127	0.249951	-0.722028	0.0256241	0.181368	-0.429701	0.156438	0.347408	-0.53183	0.00550877	0.0554906	-0.602213	0.0115008	0.133774	-0.187597	0.292701	0.388039
Bud13	0.220975	0.548741	0.957503	-0.0896846	0.824421	0.996172	0.492512	0.127162	0.270833	0.176993	0.644237	0.802692	0.379129	0.282583	0.496948	0.456863	0.0522312	0.223528	0.456491	0.10303	0.392008	0.432147	0.0335024	0.063505
Bud31	0.293528	0.399119	0.955693	0.196496	0.526659	0.978494	0.938017	0.00309682	0.0268378	-1.45019	0.0344431	0.201864	-0.793343	0.0780862	0.228692	-0.964159	0.00150979	0.0233246	-1.10883	0.000527315	0.0232859	-0.527883	0.0202146	0.0411466
Bxdc1	-0.0390513	0.914955	0.991704	0.160438	0.524823	0.978125	-0.789547	0.00433124	0.0332506	-1.53152	0.0248407	0.179515	-0.797468	0.171536	0.365719	-0.140875	0.710461	0.871271	-0.690334	0.167782	0.492752	0.268403	0.40963	0.508528
Bxdc2	-0.638525	0.135991	0.955693	-0.28973	0.439249	0.966496	-1.35494	0.000552471	0.00865567	0.496377	0.349564	0.577303	-0.0395785	0.939148	0.971469	0.297631	0.501311	0.748307	-0.280088	0.56062	0.819178	0.709958	0.101507	0.161467
Bxdc5	-0.220957	0.520531	0.95698	0.0646105	0.800253	0.996172	-0.502991	0.0964765	0.227376	-0.00252399	0.996679	0.999885	0.159158	0.697308	0.836138	0.311006	0.351552	0.634331	0.023588	0.953839	0.989327	0.859837	0.00643402	0.0151299
Bysl	0.174725	0.530809	0.957503	0.0587119	0.812018	0.996172	-0.153004	0.572912	0.71693	0.309077	0.340883	0.568233	0.0769599	0.802837	0.899004	-0.071331	0.715198	0.874073	-0.0471487	0.848142	0.951812	0.421138	0.0159265	0.0334553
Bzw1	0.0322265	0.891279	0.988926	0.274356	0.217764	0.928686	-0.350815	0.131591	0.276889	-0.804355	0.0657112	0.253246	-0.772713	0.0399988	0.154906	-0.0874806	0.751561	0.892809	-0.368027	0.236175	0.569605	-0.218832	0.40376	0.503501
Bzw2	0.145647	0.560207	0.957503	0.276154	0.212949	0.924379	-0.24624	0.290572	0.465027	-0.652538	0.056686	0.237716	-0.954699	0.00222922	0.0229831	-0.619265	0.00815605	0.0722248	-0.597472	0.0332242	0.224494	0.236879	0.237113	0.327391
C030016D13Rik	0.470102	0.495082	0.955693	0.90696	0.160401	0.867557	0.00294802	1	1	0.871022	0.42347	0.642089	2.99773	4.36439e-05	0.00150195	0.784054	0.335734	0.619339	0.942276	0.3382	0.659483	-0.120187	1	1
C030039L03Rik	0.468989	0.38868	0.955693	0.597443	0.242157	0.93973	0.404328	0.425874	0.592848	-0.342066	0.562607	0.747121	0.738398	0.0900991	0.248669	0.309774	0.378653	0.65607	0.0534061	0.920296	0.97813	0.326247	0.280907	0.375395
C030044B11Rik	-0.98102	0.0717754	0.955693	-1.14338	0.03313	0.54903	-1.35887	0.00996408	0.055866	1.38349	0.0102968	0.136108	-0.202092	0.643247	0.800788	0.516297	0.0676688	0.260909	1.08327	0.0190749	0.168616	1.22368	3.77754e-05	0.000162991
C030046E11Rik	-0.128133	0.658468	0.966202	0.339647	0.146458	0.855718	-0.126504	0.608512	0.744553	0.162347	0.60864	0.779246	0.35105	0.244901	0.456673	0.0205666	0.917934	0.969211	0.00296429	0.991142	1	0.0592988	0.744314	0.808298
C030046I01Rik	0.478116	0.354501	0.955693	-0.0572987	0.93687	0.996706	1.10145	0.0229202	0.0931901	0.226991	0.47163	0.681057	0.0642862	0.834488	0.91687	-0.0358009	0.85693	0.942491	0.242004	0.321598	0.648655	-0.0636553	0.728774	0.796029
C030048B08Rik	-0.308093	0.456337	0.955693	-0.249548	0.503112	0.974559	-0.283952	0.38749	0.560172	-0.402019	0.413501	0.632838	0.286797	0.514487	0.704622	0.844485	0.0019352	0.0280716	0.132501	0.689283	0.880913	0.779811	0.000805724	0.00247419
C130022K22Rik	-0.390373	0.307165	0.955693	-0.155704	0.655804	0.990689	-0.390332	0.249264	0.421192	0.265117	0.568582	0.751825	-0.559134	0.210113	0.414576	1.01509	0.00250109	0.0329735	0.300134	0.431069	0.738552	1.1203	0.000345452	0.00117907
C130038G02Rik	-0.619778	0.220404	0.955693	-0.842016	0.0774313	0.726398	-2.09827	6.27318e-06	0.00036399	0.289801	0.519094	0.715203	-0.309945	0.411546	0.620001	0.543155	0.033088	0.170561	0.230205	0.475311	0.770625	-0.0847249	0.712149	0.782995
C130039O16Rik	0.402945	0.383118	0.955693	0.161218	0.668721	0.990767	0.813977	0.0459553	0.143014	1.23222	0.000515074	0.0347327	1.58804	1.50763e-06	0.00010903	1.49314	9.17373e-14	3.15703e-11	1.26992	6.67993e-07	0.000333329	1.45425	4.7758e-16	1.31664e-14
C1d	-0.494803	0.212565	0.955693	-0.361339	0.27637	0.948435	-1.31358	0.00110398	0.0136358	-1.45836	0.0317892	0.195837	-1.3814	0.0151829	0.0853185	-0.772865	0.0615522	0.246209	-0.833207	0.0677689	0.315749	-0.35697	0.20535	0.290259
C1galt1	-0.314937	0.363501	0.955693	-0.0529544	0.865259	0.996527	-0.890684	0.00785515	0.0479476	-1.11074	0.0421807	0.215911	-1.39859	0.00367806	0.0328034	-0.477652	0.212444	0.486841	-0.572771	0.17415	0.502171	-1.11711	0.00238862	0.00643413
C1galt1c1	-0.807194	0.0929845	0.955693	-0.660744	0.119181	0.825418	-0.819557	0.0569792	0.163782	-0.699753	0.152966	0.371435	0.124003	0.763443	0.876547	-0.592964	0.0652143	0.254931	-0.373598	0.303255	0.632483	-0.463111	0.104302	0.165437
C1qbp	-0.132604	0.629752	0.962838	0.00464483	0.974346	0.999265	-0.753838	0.00141874	0.0160716	-0.00820161	0.980737	0.992076	-0.960706	0.0466415	0.169205	0.0165757	0.941131	0.978265	-0.30563	0.247104	0.58066	1.0284	7.97788e-06	4.04775e-05
C1qtnf1	0.191612	0.728152	0.973017	-0.720851	0.324134	0.956677	-0.255583	0.734102	0.833106	0.144174	0.735282	0.859163	0.267429	0.483135	0.678156	-0.042154	0.871544	0.948853	0.411785	0.174072	0.502091	-1.82635	4.6342e-14	9.84029e-13
C1qtnf6	0.686523	0.439016	0.955693	-0.159737	0.920025	0.996527	1.47907	0.0809159	0.204282	0.281895	0.450127	0.664733	-0.0419018	0.90777	0.956253	-0.253228	0.287045	0.57303	0.063197	0.82439	0.94238	-0.859324	0.000153128	0.000573012
C1r	-0.493454	0.210747	0.955693	-0.23748	0.478547	0.970314	-1.3293	0.000272002	0.00555128	0.727501	0.0408649	0.214423	1.01884	0.00171239	0.019354	0.317348	0.138001	0.386354	0.284784	0.27716	0.608483	0.408491	0.0289267	0.0560451
C1rl	-0.645473	0.306272	0.955693	-0.588777	0.325419	0.956677	-1.20334	0.0326955	0.115325	-0.021466	0.963749	0.98507	0.543948	0.158539	0.350592	0.372681	0.163404	0.424458	0.149348	0.652976	0.861867	-0.341027	0.144437	0.21659
C1s	-0.398186	0.310533	0.955693	-0.29118	0.413012	0.960673	-0.362992	0.258764	0.431273	-0.406377	0.408778	0.628632	0.356054	0.376764	0.590069	0.277223	0.308623	0.593002	-0.142917	0.70162	0.887361	-0.149792	0.547403	0.639481
C230052I12Rik	-0.00862733	1	1	0.0483871	0.887904	0.996527	0.212784	0.582193	0.725198	-0.0990824	0.800184	0.898495	0.245522	0.507024	0.69862	-0.0724676	0.763216	0.898892	0.0650756	0.815589	0.939653	0.341409	0.0928821	0.150091
C230055K05Rik	-0.138413	0.783728	0.976016	-0.250288	0.589394	0.986372	0.105395	0.771791	0.856497	-1.55538	0.0224789	0.175682	-0.418277	0.408113	0.617303	0.139686	0.717671	0.875385	-0.616819	0.203773	0.538165	0.00541398	0.96572	0.975937
C230081A13Rik	0.106654	0.65831	0.966202	-0.0167025	0.949967	0.997148	-0.473018	0.037244	0.124898	0.160582	0.622331	0.787881	0.0879595	0.768738	0.879238	0.590739	0.00178605	0.0266292	0.567812	0.0186174	0.167113	-1.89383	1.2229e-26	9.38814e-25
C230094A16Rik	0.299643	0.515599	0.956456	-0.0618601	0.932575	0.996527	0.725177	0.0813695	0.204436	-0.30986	0.490778	0.695709	-0.478464	0.209148	0.412835	0.227465	0.373118	0.651702	-0.0262584	0.938232	0.983773	1.97726	4.65918e-20	2.03051e-18
C230096C10Rik	0.373753	0.336122	0.955693	0.488246	0.181992	0.892567	0.955353	0.00600698	0.0407821	0.0855092	0.797018	0.896353	0.0663122	0.835786	0.917516	-0.171034	0.443644	0.704354	0.169299	0.515265	0.794515	-1.13259	1.96339e-05	9.0298e-05
C2cd2	0.474822	0.29297	0.955693	0.418537	0.31811	0.955127	0.938433	0.0159855	0.0750047	0.21976	0.565519	0.74932	0.198006	0.55891	0.7387	0.0820275	0.711633	0.871781	0.369703	0.165243	0.4895	-0.371368	0.0544918	0.0958456
C2cd2l	-0.0245819	0.970525	0.999437	0.0883032	0.816349	0.996172	0.0724683	0.846582	0.906923	1.15435	0.00486411	0.0993664	0.805665	0.0366656	0.147421	-0.0629751	0.804353	0.919447	0.695852	0.0278794	0.205189	1.09363	1.14271e-07	8.72553e-07
C2cd3	0.00930228	0.958415	0.998784	-0.320846	0.47305	0.969384	0.71975	0.0463132	0.143676	0.255103	0.465318	0.676359	0.953565	0.00235309	0.0238173	0.163873	0.427629	0.692814	0.378759	0.134098	0.444804	-0.616837	0.00103043	0.00307895
C330007P06Rik	-0.0307737	0.938661	0.995096	0.0726063	0.779241	0.995877	0.00808824	0.970472	0.98348	-0.558617	0.216171	0.445924	-0.198986	0.624932	0.788972	0.322744	0.204903	0.47859	0.315739	0.293718	0.624214	0.205	0.378659	0.478477
C330019G07Rik	0.0954417	0.775287	0.974201	-0.0361174	0.931526	0.996527	0.379433	0.241132	0.412354	0.0209061	0.953812	0.980508	0.159178	0.623325	0.78784	-0.329415	0.144972	0.397168	0.17699	0.525438	0.7981	-1.2417	4.03493e-09	4.02284e-08
C330019L16Rik	-0.353411	0.388307	0.955693	-0.225791	0.54594	0.979378	-0.5134	0.142024	0.290885	0.781357	0.0941986	0.29661	0.771764	0.0592926	0.194268	0.299621	0.312254	0.597097	0.69963	0.0441975	0.258099	-0.331912	0.20253	0.286783
C330023M02Rik	0.214868	0.4778	0.955693	0.862833	0.00162749	0.0934935	1.01974	0.00013218	0.00339114	-1.18454	0.017943	0.162792	-1.25736	0.00267272	0.0257967	-0.246848	0.235177	0.51437	-0.319421	0.208879	0.542868	-0.377546	0.0519058	0.0923222
C330027C09Rik	-0.52082	0.10086	0.955693	-0.425128	0.151432	0.858332	-0.394793	0.16281	0.319937	-0.802121	0.0323905	0.197349	-0.890709	0.0123352	0.0744826	-0.328529	0.187468	0.458448	-0.679538	0.0180938	0.16506	-0.617939	0.00495795	0.0120743
C430004E15Rik	-0.0544093	0.934683	0.994867	0.224784	0.599956	0.986681	1.40414	0.000283064	0.00570704	1.15169	0.00355336	0.0868896	1.18322	0.00148403	0.0177345	0.0805764	0.725933	0.878478	0.381459	0.185633	0.515764	0.525017	0.00574003	0.0137047
C430048L16Rik	-0.0284164	0.995209	1	-0.194389	0.706946	0.992764	0.161549	0.651512	0.775242	0.722278	0.190328	0.417569	1.12903	0.0207567	0.104465	0.604467	0.12832	0.3697	0.145864	0.752463	0.912575	-0.162695	0.702379	0.774301
C530028O21Rik	0.308101	0.558193	0.957503	-0.40296	0.414911	0.960673	0.223337	0.631839	0.761197	0.537901	0.128699	0.342557	0.953303	0.00500572	0.040748	0.276155	0.248414	0.530409	0.711451	0.00969101	0.124474	0.536732	0.0184029	0.037923
C630028N24Rik	0.0856128	0.836433	0.981501	0.195898	0.632751	0.988596	0.63737	0.0959325	0.226712	-0.0998316	0.831314	0.91323	0.50579	0.231796	0.440001	0.0848754	0.761983	0.898251	-0.0885497	0.81394	0.938875	-0.148964	0.549254	0.641321
C630043F03Rik	-0.298698	0.637192	0.962838	-0.822511	0.156036	0.862256	-1.8316	0.000670894	0.00993402	-0.93727	0.126809	0.340082	-0.154819	0.783399	0.886738	0.302242	0.370551	0.64904	-0.113682	0.78033	0.923876	0.903483	0.000622274	0.00196778
C77080	-0.112518	0.82685	0.981006	-0.0958414	0.822277	0.996172	0.520241	0.143737	0.292992	1.36565	0.000934535	0.0469829	1.17827	0.00225135	0.0230682	0.326102	0.161562	0.422229	0.890148	0.00132068	0.0397342	-0.377076	0.0571976	0.0999006
C78339	-0.625693	0.197326	0.955693	-0.195448	0.643645	0.989904	-1.37708	0.00273415	0.024694	0.502435	0.26148	0.490612	-2.04024	9.72339e-06	0.000462092	-0.412917	0.145136	0.397317	-0.249122	0.468677	0.767416	0.252832	0.357122	0.455997
C79407	-0.43671	0.189505	0.955693	-0.554182	0.0691152	0.696238	-0.516834	0.148547	0.300283	-0.69352	0.199548	0.427174	-1.12191	0.0194844	0.100493	-0.0251992	0.953076	0.982629	-0.21146	0.622938	0.850693	-0.469696	0.200443	0.284352
C80913	-0.0531757	0.863738	0.986037	0.0796118	0.737342	0.9929	-0.234584	0.349844	0.523766	0.0222653	0.947052	0.977109	-0.0786075	0.796788	0.895288	0.18509	0.346851	0.628892	-0.0769685	0.751794	0.912318	0.56181	0.00161195	0.00457024
C87436	0.0597056	0.880315	0.987001	-0.23784	0.607335	0.986881	0.340156	0.366693	0.540429	-0.275723	0.488317	0.693328	0.226217	0.528695	0.716218	-0.0510424	0.834377	0.932135	-0.531932	0.0786499	0.340753	-0.0793244	0.70679	0.77839
C920016K16Rik	0.419804	0.496909	0.955693	0.162645	0.769166	0.995049	0.702366	0.206673	0.373387	-0.8052	0.168183	0.390522	-0.141822	0.774237	0.882449	0.244281	0.484705	0.738116	-0.510531	0.223078	0.554901	-0.492867	0.0939014	0.151493
Cab39	-0.308388	0.313298	0.955693	-0.0489866	0.861388	0.996527	-0.359826	0.169763	0.328213	-0.432801	0.212276	0.44125	-0.440955	0.212183	0.417164	0.0720689	0.699381	0.866061	-0.158742	0.510575	0.791764	-0.0989201	0.57581	0.664652
Cab39l	-0.0725755	0.83253	0.981006	-0.0294854	0.930634	0.996527	-0.214624	0.439041	0.604863	-1.33541	0.0302647	0.192383	-1.06029	0.0326562	0.136849	-0.500563	0.131688	0.374964	-0.558799	0.196814	0.529542	-0.811581	0.00208538	0.0057035
Cabin1	0.530417	0.277745	0.955693	-0.147591	0.771408	0.995049	1.0976	0.00946693	0.0541122	0.746801	0.0438615	0.218692	0.567428	0.0976286	0.26159	0.446567	0.0446729	0.203392	0.67523	0.0145063	0.14925	0.270224	0.179319	0.258427
Cables2	0.0577103	0.857231	0.985278	0.249823	0.422858	0.962619	0.354576	0.231706	0.401672	-0.965805	0.0226283	0.17588	-1.50054	0.000135	0.00320023	-0.494531	0.0392789	0.188019	-0.325774	0.257469	0.591242	-0.381397	0.069736	0.11816
Cachd1	0.530452	0.259735	0.955693	0.947363	0.0298719	0.530465	1.15417	0.0061348	0.0412554	0.0470491	0.881593	0.942622	0.27637	0.350748	0.565495	0.171736	0.38648	0.660464	0.210093	0.380462	0.696317	0.00835171	0.96473	0.975704
Cacna1a	-0.1449	0.747295	0.974136	-0.824755	0.040907	0.598135	-1.30468	0.000544158	0.00856576	0.563363	0.300687	0.530843	-0.0364964	0.94196	0.972687	-0.408899	0.329705	0.614483	-0.495766	0.288193	0.618664	0.798084	0.0539909	0.0952163
Cacna1c	-0.0361483	0.922664	0.992307	0.115527	0.669695	0.990767	-0.597756	0.0356996	0.121598	0.818983	0.025012	0.179631	1.13435	0.00110936	0.0141941	0.666784	0.00636929	0.0611795	0.731738	0.00949996	0.123611	0.321595	0.15717	0.231761
Cacna1g	0.420417	0.526179	0.957213	-0.471752	0.662152	0.990689	-0.777635	0.267587	0.440898	-0.564061	0.277326	0.506892	-0.43906	0.348544	0.563254	-1.41098	0.000231055	0.00619874	-1.38879	0.00103151	0.0343822	-3.08265	4.34293e-15	1.08356e-13
Cacna2d1	-0.32451	0.345438	0.955693	-0.0384837	0.909068	0.996527	-0.80874	0.0104175	0.057508	-0.548224	0.231327	0.460257	-0.373721	0.394625	0.605253	0.135343	0.608764	0.815093	-0.128921	0.718698	0.895578	-0.00745051	0.979293	0.986111
Cacnb2	-0.256482	0.604825	0.96167	0.110135	0.771399	0.995049	-0.616596	0.124729	0.267526	0.737484	0.108086	0.316305	0.706142	0.0719029	0.217535	1.01807	0.000165126	0.0047767	0.65142	0.0490865	0.270654	0.427451	0.0694594	0.117792
Cacnb3	0.454166	0.325895	0.955693	0.163329	0.687864	0.991213	0.264584	0.513508	0.668685	0.552163	0.0981642	0.301718	0.46242	0.141852	0.328465	-0.0212497	0.919884	0.969712	0.386088	0.126633	0.433151	-0.819195	1.71015e-05	7.98285e-05
Cacng7	0.0461959	0.885053	0.987542	0.276303	0.406979	0.960673	-0.327949	0.344589	0.518937	-0.0263711	0.941756	0.974127	0.0968008	0.773721	0.882283	-0.419794	0.0492536	0.216075	-0.620157	0.0158093	0.154377	-0.0128177	0.947592	0.963719
Cacybp	-0.369085	0.264265	0.955693	0.0720335	0.785974	0.996172	-0.0993997	0.728657	0.829663	-0.67998	0.193999	0.421465	0.455205	0.31345	0.528328	-0.46628	0.294376	0.579076	-1.33051	0.00228031	0.0539277	-0.732847	0.0323585	0.0616883
Cad	0.654146	0.131781	0.955693	0.406874	0.275367	0.948435	0.890566	0.0185653	0.0814782	0.439047	0.252573	0.482486	0.0944313	0.786648	0.888395	-0.322154	0.171894	0.436876	0.0180896	0.952079	0.988171	-0.167041	0.444721	0.543644
Calcoco1	0.207484	0.647972	0.963151	-0.361467	0.39578	0.960134	0.867988	0.0146238	0.0705391	1.21054	0.00141411	0.0569901	1.21567	0.00073987	0.0107168	0.59097	0.0130551	0.0965982	0.744655	0.00961381	0.124229	1.40643	3.96179e-12	6.43952e-11
Calcrl	0.109154	0.773185	0.974201	-0.120425	0.784915	0.996172	-1.57464	5.4803e-05	0.00182921	-1.05756	0.128736	0.342557	-0.78713	0.259131	0.471664	0.740063	0.00930201	0.0785398	-0.326501	0.344445	0.665945	-0.0321499	0.89727	0.926706
Cald1	-0.0209694	0.94692	0.997495	0.00922013	0.956982	0.998322	-0.152074	0.50209	0.658371	0.837294	0.0202633	0.170369	1.18363	0.000562592	0.00883018	0.507757	0.0451527	0.204922	0.60775	0.0324753	0.222277	0.407354	0.0951697	0.153118
Calm1	0.109064	0.658311	0.966202	0.24916	0.256887	0.940561	-0.248722	0.272061	0.445373	-0.414152	0.210814	0.439508	-0.888505	0.0058788	0.0453383	-0.775967	0.000258231	0.00665929	-0.692282	0.00662242	0.101058	-0.582698	0.00376272	0.0094972
Calm2	-0.167279	0.557081	0.957503	-0.210946	0.409399	0.960673	-0.674231	0.00956155	0.0544659	-0.509306	0.190987	0.417569	-0.577136	0.0699225	0.21432	-0.303574	0.137207	0.385315	-0.134196	0.588782	0.832065	0.190823	0.332937	0.430626
Calm3	0.174292	0.525804	0.957069	0.0380819	0.863682	0.996527	0.179766	0.491665	0.649136	0.582459	0.0958952	0.298793	0.545172	0.101981	0.268631	-0.335419	0.11738	0.351788	0.101503	0.702671	0.888028	-0.895908	8.68848e-06	4.37493e-05
Calr	0.597421	0.169858	0.955693	0.0975366	0.770646	0.995049	1.32598	0.00042676	0.00747212	0.12268	0.71145	0.844065	0.67392	0.0270024	0.121773	0.273649	0.181691	0.450616	0.142742	0.56571	0.821667	2.27865	5.63889e-30	5.62761e-28
Calr4	0.641368	0.307279	0.955693	1.12572	0.0783882	0.727734	1.05021	0.0682945	0.184254	-0.0937518	0.955682	0.981834	-0.693355	0.26481	0.47773	1.25632	0.00273532	0.035088	1.38995	0.00655493	0.100643	0.527876	0.215804	0.302447
Calu	-0.0138945	0.972662	0.999533	0.279333	0.231296	0.933782	-0.307348	0.207427	0.374345	-1.11784	0.057522	0.239196	-0.345226	0.500405	0.693192	-0.2362	0.323507	0.608778	-0.499739	0.144131	0.458831	-0.227877	0.247592	0.338674
Camk1	0.0280727	0.923789	0.992307	-0.140751	0.746424	0.9929	0.0212891	0.944455	0.96723	0.50845	0.135689	0.349575	0.13568	0.655114	0.807977	0.125661	0.514044	0.758451	0.310657	0.20056	0.533883	0.724157	5.68258e-05	0.000236498
Camk1d	-0.318095	0.511259	0.955693	0.141576	0.728502	0.9929	0.290624	0.415156	0.583804	-0.33347	0.466893	0.677365	-0.57713	0.168018	0.361954	0.217774	0.407653	0.677451	0.219414	0.511374	0.792065	-0.282851	0.200202	0.284162
Camk2a	0.734725	0.318741	0.955693	0.374676	0.613423	0.986881	-0.939801	0.180683	0.341727	0.259148	0.672041	0.81776	0.790877	0.125416	0.305952	0.1964	0.67117	0.849892	0.191661	0.719373	0.895751	-0.470466	0.214777	0.301347
Camk2d	-0.344396	0.236797	0.955693	-0.245267	0.356841	0.960134	-1.20638	7.54196e-06	0.000422858	0.18204	0.56071	0.745331	0.0331608	0.907474	0.956143	0.0365176	0.857839	0.942867	-0.119311	0.607638	0.843778	-0.280644	0.112544	0.176131
Camk2g	-0.142719	0.643345	0.962838	0.176908	0.49033	0.973297	0.477654	0.0561158	0.162282	-0.442658	0.161473	0.382598	-0.673418	0.0237677	0.112763	-0.208471	0.278557	0.563323	-0.312335	0.186769	0.517622	-0.933688	1.7004e-07	1.25797e-06
Camk2n2	-0.0829863	0.85868	0.985807	-0.0311561	0.955668	0.998173	-0.51322	0.133514	0.279142	1.22642	0.00205647	0.0681088	0.0490934	0.889035	0.946868	0.133208	0.541446	0.774158	0.395802	0.176768	0.505485	0.492568	0.0185018	0.0380954
Camk4	-0.45117	0.432983	0.955693	0.147356	0.752576	0.9929	-0.720219	0.123134	0.265066	-0.661587	0.225457	0.45443	-0.023022	0.974118	0.989385	-0.0258943	0.945049	0.97899	0.176465	0.719555	0.895751	-1.14607	0.00110896	0.0032802
Camkk1	-0.0409757	0.962745	0.998784	-0.114641	0.81998	0.996172	0.512299	0.1513	0.303941	0.391399	0.298962	0.528708	0.096613	0.781224	0.885275	-0.173721	0.447299	0.708017	-0.0349563	0.900925	0.971185	-0.620067	0.00151995	0.004339
Camkk2	-0.00138167	1	1	-0.0666686	0.864911	0.996527	-0.428995	0.197469	0.362736	0.422177	0.225897	0.454801	-0.0464813	0.887542	0.946509	-0.253032	0.228831	0.506934	-0.0446884	0.863949	0.958982	-0.786851	1.7697e-05	8.21854e-05
Caml	-0.492722	0.201181	0.955693	-0.171702	0.598574	0.986681	0.220138	0.462615	0.625855	0.519983	0.194534	0.421514	0.732371	0.0411154	0.157215	0.59228	0.0124879	0.0941311	0.149861	0.615915	0.846495	0.845683	2.85124e-05	0.00012726
Camsap1	0.343239	0.230715	0.955693	0.652797	0.0110068	0.324994	0.438871	0.102719	0.236588	0.270045	0.38241	0.606258	-0.0255734	0.929037	0.966392	0.0668287	0.723326	0.877132	0.0268585	0.907712	0.973733	-0.242157	0.162662	0.23824
Camsap1l1	-0.0851919	0.7454	0.974136	0.267858	0.217492	0.928674	-0.300444	0.17818	0.33902	-0.0427598	0.912188	0.959242	0.161298	0.649192	0.804535	0.383169	0.0730408	0.271186	0.450459	0.127851	0.435011	-0.701028	0.000770901	0.00237971
Camta1	0.552248	0.325883	0.955693	0.236344	0.652429	0.990305	-0.0804723	0.919603	0.953125	0.648775	0.187696	0.414822	0.0227146	0.960291	0.982843	0.241909	0.38461	0.659921	0.341454	0.330302	0.655331	0.891492	0.000165247	0.000613985
Cand1	-0.00612345	0.995247	1	0.276785	0.22961	0.932643	-0.142335	0.552354	0.700978	-0.80652	0.0200794	0.169537	-1.64766	0.00238076	0.0240242	-0.729935	0.000245307	0.00644477	-0.677032	0.00772947	0.109978	-1.3656	1.03744e-13	2.12164e-12
Cand2	-0.155091	0.626982	0.962838	-0.337584	0.239215	0.939246	0.0351518	0.899084	0.939861	0.424279	0.198595	0.426416	-0.216288	0.468595	0.66675	-0.404388	0.0369546	0.182037	0.15894	0.526631	0.798507	-1.12595	1.09912e-08	1.01099e-07
Cant1	-0.107046	0.81931	0.981006	-0.888223	0.0324352	0.544956	0.461818	0.217074	0.385069	0.733604	0.0516741	0.230152	0.647908	0.065016	0.204817	-0.182488	0.434794	0.698752	0.192088	0.521624	0.796933	-0.266348	0.20487	0.289686
Canx	0.0515061	0.824682	0.981006	0.268702	0.213257	0.924379	0.34431	0.113821	0.252262	-0.14202	0.690518	0.829985	0.596198	0.066243	0.206862	0.0566211	0.805587	0.919966	-0.106645	0.697537	0.885074	0.430385	0.0738323	0.123923
Cap1	0.0623966	0.790556	0.977712	0.13695	0.526265	0.978494	0.0981448	0.651732	0.775242	-0.497057	0.189571	0.41709	-0.0658868	0.840196	0.919828	0.00816722	0.970117	0.990407	0.0702397	0.812699	0.9382	-0.00707714	0.970242	0.979166
Capg	0.65227	0.234661	0.955693	-0.015319	0.997512	1	1.10945	0.0216159	0.0898748	0.628931	0.0682407	0.256706	0.586129	0.0791829	0.230191	0.0249523	0.90145	0.962126	0.359741	0.151399	0.470695	0.0401187	0.815361	0.864383
Capn1	0.613285	0.343201	0.955693	-0.450249	0.478616	0.970314	1.33774	0.0166183	0.0764287	0.828054	0.015635	0.156256	0.59939	0.0670425	0.208373	0.0864822	0.662397	0.845432	0.501718	0.0454097	0.261418	-0.230363	0.214981	0.301437
Capn10	-0.238377	0.618801	0.962615	-0.485377	0.259339	0.943304	0.868889	0.0177253	0.079263	0.301172	0.41821	0.637418	0.601202	0.0835486	0.237689	0.158816	0.501219	0.748307	0.0502779	0.863464	0.958978	0.618389	0.00357737	0.00910074
Capn2	0.1884	0.466275	0.955693	0.250327	0.280705	0.948861	0.13148	0.569973	0.714256	0.219235	0.510205	0.708481	0.593183	0.0574123	0.190167	-0.161723	0.439284	0.702016	-0.0393401	0.877709	0.963106	-0.480348	0.0143494	0.0305475
Capn6	-0.135915	0.643201	0.962838	0.000150645	0.99156	1	-0.104892	0.67447	0.793069	-0.639494	0.113037	0.323056	0.338246	0.318947	0.533884	-0.0883174	0.678326	0.854197	-0.220506	0.426655	0.734525	0.589539	0.0014544	0.00416974
Capn7	-0.505014	0.12673	0.955693	-0.267559	0.37653	0.960134	-0.537067	0.0671136	0.182257	-0.744156	0.138788	0.353416	-0.565206	0.296415	0.51162	0.0864005	0.763608	0.898892	0.17886	0.676178	0.872882	-0.234486	0.236131	0.326306
Capns1	0.584127	0.1953	0.955693	0.140681	0.70925	0.992764	0.884347	0.0303993	0.110162	-0.749549	0.0970914	0.300029	-0.81192	0.0495342	0.174091	-0.0633708	0.764647	0.899373	-0.13634	0.615159	0.846495	0.182756	0.366995	0.466338
Caprin1	-0.0764557	0.803726	0.979508	0.0503817	0.838952	0.996172	-0.482273	0.053779	0.158309	-0.00551438	0.986203	0.99548	-0.181572	0.552599	0.734053	0.0746697	0.7039	0.867644	0.117892	0.62342	0.850693	-0.347453	0.0585013	0.101697
Caprin2	-0.670529	0.167203	0.955693	-0.708419	0.11852	0.822555	-0.515851	0.220335	0.388644	-0.203114	0.673005	0.818488	-0.143852	0.737569	0.859343	0.568834	0.0376104	0.183661	0.331831	0.31387	0.641071	-0.264711	0.265391	0.358476
Caps2	-0.538593	0.433878	0.955693	-0.417096	0.531396	0.978799	-0.230297	0.691653	0.803386	-0.286625	0.613453	0.782698	-1.21295	0.0251972	0.116799	0.537496	0.13078	0.374025	0.501901	0.257109	0.59096	0.250424	0.505065	0.601929
Capza1	-0.129539	0.611744	0.962589	-0.0321428	0.894212	0.996527	0.0465119	0.829733	0.894898	-1.35871	0.0213493	0.172092	-1.3042	0.0108524	0.0681543	-0.387604	0.0727871	0.271002	-0.0972789	0.74103	0.907101	-0.865038	1.73931e-06	1.03447e-05
Capza2	-0.493393	0.15923	0.955693	-0.204538	0.501155	0.974559	-1.0584	0.000711572	0.0103164	-0.243531	0.509796	0.708208	-0.52076	0.144867	0.332404	-0.102265	0.696971	0.864715	-0.282965	0.340754	0.662265	0.0757236	0.753001	0.815424
Capzb	-0.376657	0.23735	0.955693	-0.121556	0.679583	0.991186	-0.506795	0.0679893	0.183834	-0.629566	0.0769497	0.270799	-0.261693	0.425506	0.631713	-0.275359	0.204315	0.477756	-0.125205	0.658581	0.864025	-0.232627	0.218871	0.306186
Car10	1.79391	0.0289006	0.955693	1.18595	0.10035	0.787554	-1.24255	0.136531	0.283576	-0.360231	0.621187	0.787431	-0.21196	0.772839	0.88169	-0.103645	0.833914	0.932135	0.0492212	1	1	-2.34557	8.18756e-05	0.000329198
Car13	-0.685808	0.0639598	0.955693	-0.669103	0.0454013	0.621543	-1.27067	0.00022681	0.0049315	-0.474377	0.190805	0.417569	-0.339135	0.381182	0.594591	-0.0410565	0.850496	0.940281	-0.402442	0.121027	0.423063	-0.194031	0.329935	0.427575
Car5b	-0.1711	0.772886	0.974201	-0.314071	0.544621	0.979378	-0.507189	0.251184	0.423234	-0.978449	0.140859	0.356252	-0.590714	0.177266	0.373505	-0.223922	0.570334	0.793013	-0.15883	0.732649	0.903001	-0.782275	0.00958608	0.0214553
Car6	-0.604876	0.378872	0.955693	-0.410385	0.530847	0.978799	-1.31645	0.0309497	0.11167	0.0346408	0.962634	0.984635	1.04813	0.0220541	0.107998	2.10168	3.31211e-12	1.00166e-09	0.587326	0.177296	0.505836	5.73601	1.16848e-130	1.16615e-126
Card6	0.244774	0.597775	0.96167	0.104664	0.790627	0.996172	0.537515	0.148868	0.300446	-0.712916	0.176517	0.4006	0.24593	0.553117	0.734643	0.48219	0.0619461	0.246894	0.450387	0.19739	0.529984	-1.15666	1.75384e-06	1.04248e-05
Carhsp1	0.519887	0.154632	0.955693	1.13807	0.000652104	0.049303	1.08302	0.000866898	0.0115355	0.539229	0.131302	0.344552	0.204623	0.512732	0.702885	-0.292034	0.148251	0.402016	0.321561	0.26344	0.596807	-0.0593491	0.772604	0.830473
Carkd	0.137138	0.695966	0.971405	0.130264	0.68812	0.991213	0.126137	0.684557	0.799123	0.217646	0.525925	0.719991	0.193413	0.586117	0.760657	0.0753387	0.719839	0.875559	0.0557992	0.841276	0.949551	0.67181	0.000585653	0.00186319
Carm1	0.50786	0.251282	0.955693	0.238645	0.538232	0.979378	0.603945	0.125812	0.268866	0.373079	0.287451	0.51689	0.0743497	0.818721	0.908073	-0.21598	0.319981	0.605251	0.084106	0.750973	0.912187	0.0211908	0.918842	0.943129
Cars	0.0256458	0.909383	0.991053	0.0469633	0.825736	0.996172	-0.00258815	0.996439	1	0.000131729	0.999763	1	0.118108	0.684823	0.828428	0.442915	0.0204089	0.126746	0.170574	0.484237	0.777209	0.43759	0.0120107	0.0261775
Cars2	0.706862	0.100096	0.955693	0.521372	0.20198	0.917386	0.742664	0.0353685	0.120922	-0.369294	0.331978	0.559981	-0.0123386	0.972748	0.988849	-0.497125	0.0294159	0.158344	-0.653236	0.024243	0.190976	0.0458717	0.820617	0.867743
Casc3	0.0544502	0.85918	0.985975	-0.297001	0.373982	0.960134	0.493881	0.0999036	0.232139	0.607426	0.0669399	0.25518	0.493158	0.109642	0.281293	0.49216	0.0136473	0.0992714	0.768796	0.00226667	0.0537324	0.482602	0.00835826	0.0190838
Casc4	-0.607038	0.175968	0.955693	-0.318042	0.424709	0.962959	-0.76932	0.0576815	0.165041	-0.111301	0.808709	0.902752	-0.13883	0.724649	0.854114	0.171863	0.556773	0.786496	0.287282	0.474511	0.770625	-0.155554	0.502504	0.599449
Casc5	-0.430715	0.186261	0.955693	-0.388415	0.20491	0.917454	-0.513575	0.10291	0.236809	-0.433134	0.415684	0.634968	-1.2582	0.00847586	0.0578981	0.20878	0.575042	0.795371	0.0307466	0.94722	0.986529	-0.915781	0.0101184	0.0225203
Casd1	-0.598034	0.127167	0.955693	-0.561586	0.116341	0.822555	-0.999453	0.00557613	0.0390742	-1.09379	0.0188183	0.166496	-0.972217	0.0288771	0.126734	-0.3598	0.122775	0.360527	-0.926256	0.0118016	0.135419	-0.217739	0.255276	0.347143
Cask	-0.0486815	0.860907	0.986037	0.0500115	0.816155	0.996172	-0.576546	0.0126751	0.0650372	-0.522164	0.229956	0.458717	-0.0118145	0.976346	0.990639	0.263481	0.245841	0.527746	-0.256205	0.41897	0.728139	-0.231928	0.25932	0.35168
Caskin1	-0.132479	0.867195	0.986101	0.0246801	0.980424	1	-0.0014338	1	1	0.639403	0.22093	0.450268	0.619152	0.200729	0.403585	-0.754609	0.0160803	0.109171	0.112377	0.758775	0.915616	-1.10772	3.01882e-05	0.00013408
Caskin2	0.534622	0.394664	0.955693	-0.0153208	1	1	1.38833	0.0194495	0.0837746	1.09064	0.00677981	0.115871	0.700219	0.0530082	0.1808	0.135115	0.552786	0.784306	0.41584	0.164916	0.48915	-0.277533	0.16324	0.239016
Casp12	-0.484911	0.213308	0.955693	-0.486085	0.183989	0.893789	-1.25293	0.000472772	0.0078769	-1.70928	0.030632	0.193241	-1.9226	0.00154882	0.018271	-0.202554	0.585534	0.800826	-1.1908	0.0211542	0.176669	-0.804413	0.00949012	0.0212631
Casp2	-0.144725	0.677518	0.968419	-0.279706	0.368438	0.960134	-0.160007	0.590185	0.730773	-0.64531	0.110644	0.319881	-0.116761	0.741815	0.862556	-0.17517	0.418052	0.685627	-0.293501	0.3131	0.640334	-0.664979	0.00178396	0.00500674
Casp3	0.163963	0.684872	0.970549	0.57031	0.150021	0.857166	0.616045	0.102883	0.236809	-0.792958	0.0556961	0.236129	-0.449306	0.249013	0.460961	-0.315657	0.249085	0.530716	-0.332176	0.294022	0.624328	-1.46276	1.56583e-08	1.39901e-07
Casp4	-0.413561	0.41254	0.955693	-0.429167	0.336688	0.960134	-0.606171	0.132448	0.27772	-1.29425	0.10381	0.309738	-1.37489	0.0247991	0.115756	0.806795	0.0283865	0.155336	-0.262674	0.674585	0.871841	1.73348	1.221e-11	1.84629e-10
Casp6	-0.644488	0.209405	0.955693	-0.339072	0.478652	0.970314	-0.434216	0.333672	0.508638	-0.141472	0.696827	0.834954	-0.57476	0.0883091	0.245768	-0.467125	0.031989	0.166103	-0.321966	0.249082	0.583119	-1.15961	1.77148e-09	1.88479e-08
Casp7	0.325702	0.491305	0.955693	0.488926	0.269901	0.947959	0.689858	0.0782022	0.200346	0.388586	0.360805	0.588083	0.254651	0.487144	0.681674	0.591793	0.0197347	0.124575	0.524588	0.0855461	0.354695	0.308202	0.145568	0.218002
Casp8	-0.13955	0.668569	0.967922	0.0469871	0.857125	0.996527	0.030187	0.909196	0.946806	-0.801007	0.0753265	0.267564	-0.705026	0.0750969	0.223287	-0.158829	0.548882	0.780764	-0.18165	0.583849	0.830393	-0.269263	0.179988	0.259054
Casp8ap2	-0.179878	0.565128	0.957503	0.0120205	0.954024	0.997921	-0.54125	0.0451767	0.141558	-0.242608	0.552068	0.739748	0.0392941	0.917386	0.960477	0.137077	0.579392	0.798231	0.163174	0.584818	0.830393	-1.35428	2.8222e-08	2.40937e-07
Casp9	-0.305949	0.493486	0.955693	-0.953712	0.0236049	0.483928	-0.108543	0.770333	0.85563	0.178555	0.636636	0.798094	-0.18671	0.600602	0.771131	0.156518	0.49713	0.745285	0.299641	0.271149	0.604708	-0.565998	0.00458221	0.011272
Cass4	0.845893	0.288816	0.955693	0.217307	0.797591	0.996172	-0.326056	0.597147	0.736927	-0.401871	0.518109	0.714386	1.3869	0.0104683	0.0667216	1.43329	0.000158087	0.00459974	0.808857	0.0771969	0.337314	4.1903	1.64881e-37	3.42815e-35
Cast	-0.0358788	0.901423	0.990444	0.0111959	0.950127	0.997148	-0.151335	0.525433	0.677759	-0.465362	0.355043	0.583328	-0.36872	0.411574	0.620001	0.455886	0.0696714	0.264754	0.369344	0.202769	0.5369	1.01944	1.5299e-05	7.24651e-05
Cat	0.294486	0.33348	0.955693	0.383065	0.15427	0.859411	1.75943	2.29436e-12	1.63555e-09	0.362531	0.249128	0.479522	0.412021	0.169704	0.363677	0.303551	0.11872	0.353855	0.178107	0.453047	0.756328	0.794761	5.51668e-06	2.90996e-05
Cav1	-0.0744972	0.786471	0.976251	-0.266077	0.259532	0.943304	-1.60848	2.78588e-11	1.20883e-08	-0.510752	0.124396	0.336989	-0.298421	0.306521	0.521405	-0.474125	0.017965	0.116954	-0.558274	0.0244201	0.191664	-1.12865	9.80544e-10	1.09217e-08
Cav2	-0.608835	0.0949849	0.955693	-0.953103	0.00506295	0.192148	-1.61742	8.11131e-06	0.000439951	-0.888549	0.015081	0.154526	-1.12157	0.000951749	0.0129176	-1.04249	5.94359e-06	0.000337028	-1.05745	3.79942e-05	0.00505117	-1.57487	2.62957e-16	7.49404e-15
Cbara1	0.206528	0.545141	0.957503	-0.238854	0.452777	0.967686	0.416112	0.174262	0.334384	-0.239062	0.448461	0.66355	-0.0719066	0.801938	0.898344	-0.0239127	0.899552	0.961408	-0.0397915	0.866879	0.960502	0.294433	0.089051	0.144721
Cbfa2t2	0.0973423	0.745746	0.974136	0.319422	0.252274	0.93973	0.445742	0.114452	0.25302	0.0418131	0.904312	0.95503	-0.116063	0.717837	0.849421	0.241008	0.25353	0.534852	0.122003	0.653539	0.862057	-0.883437	9.90946e-05	0.000390278
Cbfb	-0.185873	0.511495	0.955693	0.0657253	0.779083	0.995877	-0.306872	0.212678	0.380264	-0.0861448	0.81966	0.906542	-0.0712028	0.841522	0.920372	0.0627577	0.80475	0.919447	-0.0408622	0.897106	0.970048	0.147353	0.525154	0.619654
Cbl	0.474435	0.14553	0.955693	0.50538	0.0848317	0.748059	0.461148	0.105792	0.240556	-0.662228	0.133798	0.347573	-0.294883	0.460204	0.660178	-0.275657	0.344512	0.626386	-0.119762	0.73435	0.90401	-0.98204	0.000627161	0.0019826
Cblb	0.268654	0.430288	0.955693	0.328102	0.301479	0.95446	0.449811	0.142771	0.291751	1.33476	0.000293535	0.029698	1.40651	4.77404e-05	0.00158817	1.28372	6.49168e-09	1.0123e-06	1.37714	2.15924e-07	0.000134683	1.1041	1.9369e-08	1.70612e-07
Cbll1	-0.918343	0.0795483	0.955693	-0.489901	0.313317	0.955127	-0.531326	0.224072	0.392736	-0.577704	0.346855	0.574541	-0.236321	0.692549	0.833368	0.170746	0.476409	0.731709	0.511465	0.0867531	0.357488	0.197662	0.320403	0.417575
Cbln3	-0.271224	0.807229	0.979881	0.732358	0.147926	0.856821	0.478173	0.353917	0.527651	0.0188005	1	1	0.26588	0.573787	0.751298	0.664893	0.0509692	0.22011	0.354383	0.422648	0.731865	-0.234412	0.49888	0.595766
Cbr1	-0.180553	0.591105	0.96034	-0.320883	0.289294	0.948861	0.318618	0.248435	0.420899	0.0805415	0.818081	0.905894	0.112881	0.73747	0.859343	-0.132194	0.539128	0.772837	-0.169835	0.517458	0.795174	0.0608433	0.750647	0.813316
Cbr3	0.234701	0.536164	0.957503	1.01552	0.00334384	0.149584	1.57872	1.373e-06	0.000106221	0.098557	0.802385	0.899219	-0.785858	0.0267606	0.121341	-0.861716	0.00010097	0.00328234	-0.711128	0.0093053	0.122419	-0.692533	0.000392309	0.00131827
Cbr4	-0.460295	0.376756	0.955693	-0.86903	0.0972752	0.781019	-0.662526	0.133949	0.279503	-0.557566	0.301659	0.531704	-0.362967	0.423209	0.630581	0.20624	0.607193	0.814243	-0.586041	0.153629	0.473947	0.531637	0.078036	0.12967
Cbwd1	-0.132505	0.722474	0.973017	0.11579	0.702925	0.992528	0.234319	0.448348	0.613199	-2.12796	0.00454458	0.0961843	-1.60437	0.0036677	0.0327403	-0.283039	0.440735	0.702656	-1.09486	0.0266528	0.200448	0.0482553	0.861931	0.901118
Cbx1	0.143023	0.681606	0.970077	0.396543	0.223328	0.929887	-0.191742	0.584115	0.726512	0.301539	0.403615	0.623283	0.642759	0.052623	0.179978	-0.17243	0.496056	0.744478	-0.112753	0.694145	0.883168	-0.136702	0.544245	0.636782
Cbx2	-0.253878	0.602407	0.96167	0.366834	0.373006	0.960134	0.56881	0.160084	0.315957	0.90607	0.00832296	0.1273	0.655305	0.0381725	0.150876	0.0478727	0.81814	0.923856	0.0315402	0.90168	0.971579	0.218062	0.228141	0.317258
Cbx3	-0.224095	0.425856	0.955693	-0.1247	0.611098	0.986881	-0.961195	0.000124118	0.0032608	-0.478926	0.243681	0.473654	-0.451766	0.243393	0.45437	-0.150133	0.626067	0.824402	-0.493629	0.14285	0.45723	-0.664342	0.026149	0.0513513
Cbx4	0.34181	0.337982	0.955693	-0.494979	0.168208	0.880853	-0.23203	0.492878	0.649759	1.36452	0.00125528	0.0542324	1.50168	5.64007e-05	0.00177564	1.1761	8.31679e-06	0.00043685	0.748426	0.0218171	0.179946	1.60972	2.48392e-10	2.98669e-09
Cbx5	0.0892065	0.715299	0.972787	0.145223	0.512868	0.975024	-0.255333	0.258508	0.431063	-0.550922	0.199794	0.427387	-0.406178	0.235964	0.445567	-0.429102	0.0445453	0.202996	0.171098	0.584629	0.830393	-1.46048	9.29507e-16	2.51395e-14
Cbx6	-0.0647694	0.848275	0.984165	-0.102476	0.723552	0.9929	0.17162	0.551312	0.70019	0.923534	0.0104096	0.136551	1.13011	0.000994127	0.0131758	-0.297882	0.15794	0.417713	0.307865	0.255574	0.58906	-1.19773	7.1326e-10	8.08901e-09
Cby1	0.217397	0.611563	0.962589	-0.131247	0.756708	0.993133	0.649442	0.050143	0.15165	1.08397	0.0149464	0.154526	1.25757	0.00132972	0.0163231	0.207427	0.420802	0.68767	0.546595	0.0893634	0.36209	0.526119	0.0214869	0.0433473
Cc2d1a	0.473729	0.363659	0.955693	-0.127477	0.829057	0.996172	1.10739	0.0187065	0.0819285	0.850262	0.0219675	0.173582	0.493999	0.12933	0.311994	0.181922	0.383667	0.659263	0.495847	0.065326	0.309717	-0.435397	0.0206757	0.0419653
Cc2d1b	0.246699	0.454826	0.955693	-0.207167	0.512804	0.975024	0.556553	0.0504114	0.152134	0.925198	0.011135	0.138391	0.530976	0.116511	0.29182	0.567554	0.00419687	0.0466943	0.669165	0.0100729	0.126494	0.147921	0.408577	0.507606
Cc2d2a	0.0641285	0.827847	0.981006	-0.34107	0.276671	0.948435	-0.377765	0.225236	0.39391	-0.407078	0.291084	0.520653	-0.526563	0.143029	0.329813	0.340752	0.13737	0.385315	0.144832	0.598287	0.837434	-0.278345	0.195751	0.278806
Ccar1	-0.636304	0.103092	0.955693	-0.32394	0.360292	0.960134	-1.05567	0.00366201	0.0297613	-1.13931	0.0271347	0.18571	-0.772114	0.0732378	0.219625	-0.0846938	0.738301	0.885712	-0.560479	0.115263	0.412565	0.419767	0.0295942	0.0571166
Ccbe1	-0.0847268	0.786718	0.976251	-0.10682	0.695354	0.991213	-0.892552	0.000897672	0.0118502	0.286133	0.408831	0.628632	0.114107	0.723415	0.853087	0.339882	0.0886764	0.30283	0.536978	0.05732	0.292162	-1.61077	9.68689e-17	2.88582e-15
Ccdc101	0.27678	0.507658	0.955693	0.209667	0.584686	0.983139	0.411916	0.25247	0.424541	-0.0544822	0.878022	0.941108	-0.015932	0.962942	0.984553	0.0879509	0.675941	0.852739	0.139928	0.58816	0.83188	0.948852	5.81257e-07	3.88543e-06
Ccdc102a	0.181537	0.685801	0.971177	-0.712077	0.123611	0.830956	0.0984723	0.797718	0.872272	1.19072	0.00162826	0.0606644	0.274091	0.416393	0.624526	0.122716	0.565935	0.790725	0.17404	0.513919	0.793334	-0.0673444	0.712007	0.782925
[truncated: 8,282 more rows]
