# Supplementary material for: Distinct transcriptional responses elicited by unfolded nuclear or cytoplasmic protein in mammalian cells
Source: eLife. 2015 Aug 28;4:e07687. doi: 10.7554/eLife.07687 (PMC4566031; doi:10.7554/eLife.07687)
Supplement: Supplementary file 3. — Gene ontology analysis for genes responding to unfolded destabilizing domain (DD) stress. DOI: http://dx.doi.org/10.7554/eLife.07687.019 [file elife07687s003.xlsx]

## Sheet: Summary
Gene Ontology analysis for genes responding to unfolded DD stress
Tab name
Venn_Gene = Significantly induced or repressed (FDR < 0.05) genes only by unfolded DD stress, which was defined by Venn diagram in Figure 3B.
Venn_GO_up = Gene ontology analysis using significantly induced genes only in unfolded DD stress from “Venn_Gene”.
Venn_GO_down = Gene ontology analysis using significantly repressed genes only in unfolded DD stress from “Venn_Gene”
Heatmap_Gene = Significantly induced or repressed (FDR < 0.05) genes only by unfolded DD stress, which was defined by the hierarchical clustering heatmap in Figure 3A.
Heatmap_GO_up = Gene ontology analysis using significantly induced genes only in unfolded DD stress from “Heatmap_Gene”
Heatmap_GO_down = Gene ontology analysis using significantly repressed genes only in unfolded DD stress from “Heatmap_Gene”
Column name for Gene Ontology analysis
Term : Gene Ontology term
Count : number of genes matched with the Term.
% : the number of genes in the list compared to the number of total genes included in the Term
PValue : pvalue for the term
Genes : name of genes matched to the Gene Ontology term.

## Sheet: Venn_Gene
Venn Diagram DDonly genes
up	down
0610031J06Rik	0610010F05Rik
1110014N23Rik	1110032E23Rik
1300018I05Rik	1110034A24Rik
1500031L02Rik	1110034B05Rik
1600002H07Rik	1110067D22Rik
2010011I20Rik	1190002H23Rik
2410131K14Rik	1190007I07Rik
2810046L04Rik	1600012F09Rik
2810428I15Rik	1600012H06Rik
3110002H16Rik	1700024P16Rik
4632434I11Rik	2010204K13Rik
4933407C03Rik	2300009A05Rik
5031439G07Rik	2310003F16Rik
6530418L21Rik	2310009B15Rik
9030617O03Rik	2310022B05Rik
9230105E10Rik	2310061J03Rik
9530068E07Rik	2610008E11Rik
9930013L23Rik	2610021K21Rik
Aamp	2610036L11Rik
Aars	2610305D13Rik
Aars2	2700007P21Rik
Abca2	2700029M09Rik
Abca7	2700089E24Rik
Abcb6	2810021B07Rik
Abcc1	2900010J23Rik
Abcf3	3110003A17Rik
Abhd12	3200002M19Rik
Abhd4	4932412H11Rik
Abr	5033414D02Rik
Acadvl	5730408K05Rik
Aco2	5730508B09Rik
Acot7	9130024F11Rik
Acox1	9130401M01Rik
Actr1a	A130010J15Rik
Adamts7	Aasdhppt
Adar	Abce1
Adm	Acer3
Aen	Acyp1
Aldh2	Adam22
Aldh7a1	Adamts5
Aldoa	Adpgk
Als2	Agbl3
Ap2a1	AI662270
Ap2b1	Ak5
Ap3s2	Akr1b3
Ap4m1	Akr1c14
Apaf1	Als2cr4
Arhgap21	Amotl2
Arhgdib	Ankrd1
Arhgef7	Anp32a
Arnt2	Anp32b
Arrdc1	Ap3s1
Asb6	Apbb1ip
Asl	Apoo
Atg2a	Arglu1
Atg2b	Arhgap29
Atmin	Arhgef9
Atp6v0c	Arl6ip6
Atp6v1a	Atg3
Atp6v1h	Atp2a1
AU040829	Atp2b1
AW555464	Azin1
AY074887	B230219D22Rik
B230120H23Rik	B630019K06Rik
Bahd1	Basp1
Baz2a	BC002199
BC021381	BC003885
BC028528	BC021785
BC046331	BC024659
Bcap31	BC031441
Blvrb	Bcl10
Bod1	Bcl2
Bpgm	Bcl6
Bud31	Bdnf
C230096C10Rik	Bmi1
C330023M02Rik	Bmp2k
Cachd1	Bnip3
Carhsp1	Bola3
Cbr3	Bphl
Ccdc22	Brd7
Cchcr1	Brp44
Ccnf	Brp44l
Cd151	Btbd1
Cd81	Bxdc1
Cdan1	Bxdc2
Cdc34	C130038G02Rik
Cep120	C1d
Cherp	C1qbp
Chpf2	C1r
Clip2	C630043F03Rik
Clptm1	Cacna1a
Cnnm3	Calcrl
Copa	Camk2d
Copg	Capza2
Coq6	Car13
Cpsf1	Casd1
Crat	Cbx3
Crtc2	Ccar1
Cryab	Ccdc112
Ctnnbl1	Ccdc122
Ctsa	Ccdc53
Ctsd	Ccdc59
Cx3cr1	Ccdc72
D10Wsu52e	Ccl9
D16H22S680E	Ccnh
D17Wsu92e	Ccni
D8Ertd738e	Cct4
Dad1	Cdc73
Dcaf12	Cdh11
Dcaf7	Cdk8
Dctn2	Cdkl3
Dctn4	Cdr2
Ddb1	Cebpb
Ddx41	Cebpd
Ddx47	Cebpg
Def8	Cenpk
Dennd2c	Cenpq
Dgat1	Cenpv
Dhx16	Cep63
Dhx32	Cep78
Dhx38	Cetn3
Dhx57	Cflar
Dhx8	Chac1
Diablo	Chchd1
Dixdc1	Chmp2a
Dlg5	Cisd1
Dnajb12	Cited2
Dnajc11	Clns1a
Dnajc18	Cmpk1
Dpp3	Cnn3
Drg2	Cno
Dym	Cntln
Dync1h1	Comt1
Dynll2	Coq10b
Dysf	Coq2
Eaf1	Cox16
Eda2r	Cox17
Eef2	Csgalnact2
Efemp2	Csnk1a1
Ehd3	Csnk1g3
Ei24	Cthrc1
Eif2b4	Cycs
Eif2c3	D030056L22Rik
Eif3h	D16Ertd472e
Eif3l	Dars
Elmo2	Dclre1a
Emilin1	Dcn
Ephx1	Dctd
Ercc2	Dcun1d5
Esco2	Ddx18
Exoc1	Ddx21
Exoc4	Ddx5
Ezh1	Dek
Fam115a	Dimt1
Fam115c	Dkc1
Fam134a	Dnajc21
Fam134c	Dnttip2
Fam13a	Dock11
Fam18a	Dtymk
Fam63a	Dus4l
Fam65a	Dut
Fam69b	Dync2li1
Fas	Dynll1
Fat1	Ebag9
Fbxl19	Ebf3
Fbxo21	Ebna1bp2
Fbxo34	Edn1
Fgfrl1	Eea1
Fig4	Eef1e1
Fkbp14	Efemp1
Flywch1	Efha2
Fn3krp	EG434371
Frmd8	Eif1a
Fryl	Eif2s2
Fto	Eif3m
G6pdx	Eif5b
Gabarapl2	Emx2
Gbf1	Eny2
Gclc	Epb4.1l2
Gga2	Eps8
Gk5	Esco1
Gm4759	Esf1
Gna11	Etf1
Gpatch1	Exosc6
Gpi1	Fahd1
Gpt	Fam107b
Gsk3a	Fam126a
Gsn	Fam162a
Gsr	Fam164a
Gsta4	Fam188a
Gstm1	Fam46b
Gstm5	Fam53a
Gstp1	Fam60a
Gtf3c1	Fam76b
Gtf3c4	Far1
Gtse1	Farp1
Gyk	Fbxo4
Hadh	Fchsd2
Hdac6	Fert2
Heatr7a	Fez2
Helz	Fgf10
Herc2	Fgfr1op2
Hes6	Fhl2
Hif1an	Fibin
Hist1h1e	Filip1l
Hist1h2ak	Fkbp3
Hist1h2bc	Fmnl2
Hist1h2bg	Foxg1
Hist1h3f	Foxn2
Hist1h4i	Foxp1
Hk1	Fst
Homer3	Fyn
Hpcal1	Fzd1
Hsdl1	Fzd2
Hsf2	G3bp1
Hspa13	Gabpb1
Hspa2	Galnt13
Hspbp1	Gas2
Huwe1	Gatad1
Hyal2	Gbas
Ide	Ghr
Ifi30	Gm11818
Igf2r	Gm13154
Ints1	Gm13889
Ints4	Gm15427
Ints9	Gm2382
Iqgap3	Gm4987
Irgq	Gm7027
Itih5l	Gng10
Jmjd4	Gng5
Katnb1	Gnl3
Kcnq1ot1	Gnpnat1
Kdm2a	Gorab
Kdm4a	Gpr149
Keap1	Grem1
Kif18b	Grinl1a
Kif3c	Grsf1
Kifc1	Gt(ROSA)26Sor
Klhl21	Gtf2a2
Ksr1	Gtf3a
Lars2	Gtf3c6
Layn	Gtpbp4
Lgals3bp	Gtpbp8
Limk1	H1f0
Lpin1	H3f3a
Lrp8	H47
Lrrc49	Hdac2
Lrrc59	Hdgfrp3
Lztr1	Hells
M6pr	Hgf
Mad2l1bp	Hmgb1
Man2a2	Hmgb2
Map3k4	Hmgn3
Mapk11	Hnrnpa2b1
Mapk8ip3	Hnrnpk
Mapk9	Hnrnpr
Mapkbp1	Hnrpll
Mdm2	Homer1
Me1	Hoxa4
Med15	Hoxd8
Med24	Hs6st2
Mepce	Htatsf1
Mettl6	Id2
Mettl7a1	Id3
Mfge8	Ifrd1
Mfsd6	Igf1
Mgat5	Igfbp7
Mgst3	Irx2
Mink1	Isg20
Mlec	Isg20l2
Mlkl	Isy1
Mll1	Itgb3bp
Mlx	Kctd14
Mmd	Kctd15
Mms19	Klf10
Mocos	Klf2
Mocs1	Klf3
Mr1	Klf4
Mrpl28	Klf6
Msl3l2	Klhl5
Msn	Kras
Mtx1	Krcc1
Mybl1	Kti12
Myst2	l7Rn6
Nacc2	Lactb
Narfl	Lactb2
Nav2	Larp2
Nbr1	Larp7
Ndor1	Las1l
Ndrg4	Lhx9
Neurl4	Lmo4
Nfkbil2	Loh12cr1
Nid1	Lonp2
Nomo1	Lox
Npc1	Lphn2
Nploc4	Lrch2
Nqo1	Lrrn4cl
Numbl	Lsm1
Nup214	Lsm8
Oaf	Lxn
Olfr614	Lyar
Osbpl7	Lyrm2
Pafah2	Lyrm4
Parp4	Mak16
Pcbp2	Marcks
Pcnxl3	Mbd2
Pdhx	Mbnl2
Pdlim7	Mbtps2
Pfkm	Mcfd2
Pgd	Meis2
Phc3	Memo1
Phf16	Mettl5
Phlda3	Mettl9
Pi4kb	Mgat2
Pisd-ps2	Mllt3
Pitpnm1	Mmachc
Pkd1	Mnat1
Pkm2	Mnd1
Plbd2	Morc3
Plcg1	Mospd1
Pld2	Mphosph10
Plekhm1	Mpp6
Plrg1	Mrp63
Plxnb2	Mrpl52
Plxnd1	Msi2
Pml	Mtap
Pnpla6	Mtcp1
Polk	Mtdh
Polr2a	Mtus1
Polr3a	Mtx2
Pom121	Murc
Ppm1f	Mxra7
Ppp1r16a	Myc
Ppp2r5d	Naf1
Pqlc2	Nampt
Prcc	Narf
Prdx1	Nbn
Prdx2	Ncl
Prdx6	Ndufa6
Prepl	Ndufaf4
Prl2c3	Ndufb2
Prpf19	Ndufb4
Prpf8	Ndufc1
Prr13	Ndufc2
Prrg4	Ndufs1
Psap	Nek6
Psma7	Nexn
Psmb2	Nfia
Psmb3	Nfu1
Psmb4	Nip7
Psmc2	Nol8
Psmc3	Nop58
Psmc4	Nov
Psmc5	Nr2f2
Psmd11	Nr4a2
Psmd13	Nsbp1
Psmd2	Nsmce4a
Psmd3	Nt5c3
Psmd4	Nucb2
Psmd8	Nucks1
Psmd9	Nudcd2
Psme4	Nudt19
Ptcd1	Nudt9
Ptges	Nufip1
Ptgr1	Nvl
Ptgs2	Nxt1
Ptk2	Oaz1
Ptpn14	Ogfrl1
Ptpn23	Osmr
Ptprn	Osr1
Pycrl	Ostc
Qars	P2rx3
Qsox1	Pa2g4
Rab11fip5	Paip2
Rab43	Papd4
Rabgef1	Parp2
Rad54l2	Pcdh19
Ranbp10	Pcnp
Rangap1	Pdap1
Rbl2	Pdcd10
Rbm14	Pdcd5
Rcan1	Pds5a
Rdh1	Per2
Recql5	Pgam5
Rexo1	Phf6
Rfx1	Pigp
Rgs12	Pigw
Rhbdf2	Pigy
Rhod	Plcb4
Riok3	Plekha4
Rnf135	Plscr2
Rnf169	Pnn
Rnf24	Pogk
Rnf40	Pole4
Rnu1b2	Ppargc1a
Rom1	Ppat
Rplp0	Ppfibp1
Rplp2	Ppil4
Rptor	Ppil5
Rusc1	Ppp1r14b
Samd4b	Ppp2r5a
Sap130	Ppp3cc
Sap30l	Ppp4r2
Saps1	Prkg2
Scamp2	Prkrir
Sec16a	Psip1
Sema4b	Pstk
Sepsecs	Ptbp2
Serpinb6a	Ptpmt1
Setd1a	Ptpn2
Sf1	Ptx3
Sfxn5	Pxmp3
Sgsm3	Qk
Sin3b	Rab3c
Skap2	Rabggtb
Slc12a7	Rac1
Slc19a2	Rap1gds1
Slc24a6	Rars2
Slc25a44	Rasa1
Slc2a10	Rasl2-9
Slc48a1	Rbm39
Slc6a8	Rbm45
Slc9a1	Rbmxrt
Smg5	Rbpj
Smpd4	Rer1
Snapc2	Rg9mtd1
Snrnp25	Rgs19
Snx10	Rhob
Sord	Rmi1
Speg	Rnaseh1
Spna2	Rnaseh2b
Spns1	Rnd3
Spr	Rnf138
Srbd1	Rnf144a
Srrm2	Rnf2
Srxn1	Rnf217
Ssx2ip	Rnft1
Stom	Rpgr
Sulf2	Rpl34
Sumf2	Rpl36al
Supt6h	Rps26
Sympk	Rps6ka6
Taf7	Rragc
Tapbp	Rrp15
Tax1bp1	Rshl2a
Tcirg1	Rsl1d1
Tctn2	Rsrc1
Tctn3	Samd4
Tet1	Scaper
Tfip11	Scg5
Thrb	Sclt1
Tiam1	Sdc2
Tkt	Seh1l
Tle6	Sema3a
Tmc6	Senp6
Tmcc2	2014-09-15
Tmem144	2014-09-07
Tmem184b	Serbp1
Tmem19	Serp1
Tmem55b	Serpina4-ps1
Tmem63b	Set
Tmem67	Setbp1
Tnfrsf10b	Sfrs7
Tnks	Sgcb
Tnpo2	Sgpp1
Tomm40l	Sh3kbp1
Tor1b	Siglecg
Tox4	Slc25a24
Traf3	Slc25a4
Trim41	Slc25a5
Trim62	Slc41a2
Trp53inp1	Smad6
Trrap	Smad7
Tsc2	Smad9
Ttbk2	Smap1
Ttc26	Smek1
Ttc38	Sms
Ttll7	Snai2
Tuba4a	Snhg1
Tubb2c	Snhg6
Tubg1	Snrpa1
Tufm	Snrpb2
Tyk2	Snrpd1
Tyro3	Snx14
Ube2o	Snx24
Ube4a	Spire1
Ubr2	Spp1
Ubr3	Spry1
Ubr4	Ssbp2
Uhmk1	Ssr3
Uhrf1bp1l	Ssu72
Ulk1	Strn3
Unc45a	Styk1
Upf1	Sub1
Usp14	Suclg2
Usp19	Sumo2
Usp20	Tada2l
Usp27x	Taf9b
Usp3	Tbx15
Usp5	Tcf4
V1rd4	Tdrkh
Vat1	Terf1
Vcp	Tfam
Vezt	Thap2
Vps11	Thbd
Vps37b	Thoc1
Wdr1	Tigd2
Wdr18	Timm8a1
Wdr62	Timm9
Wdr8	Tmco1
Wdr91	Tmed7
Wdr92	Tmeff1
Wipi2	Tmem126a
Wrap53	Tmem165
Xab2	Tmem179b
Xrcc3	Tmem47
Zbtb17	Tmem49
Zbtb45	Tmem50b
Zcchc4	Tmem9b
Zdhhc18	Tmtc4
Zfp180	Tnfaip6
Zfp277	Tnik
Zfp28	Top1
Zfp445	Tpm1
Zfp488	Tpst2
Zfp59	Trappc6b
Zfp790	Trim8
Zfp871	Trmt11
Zfyve26	Trnau1ap
Zkscan17	Tspyl4
Zkscan5	Ttc32
Zrsr1	Tubgcp2
Zswim4	Tusc1
Zwint	Twist1
	Twist2
	Txndc17
	Txnrd3
	Uba2
	Uba52
	Ube2b
	Ube2d2
	Ube2d3
	Ube2h
	Ube2n
	Ubxn2b
	Uchl3
	Uchl5
	Ugdh
	Usp1
	Vcam1
	Vgll3
	Vkorc1
	Vkorc1l1
	Vps54
	Wbp5
	Wdr43
	Wdr89
	Wwp1
	Xrcc6bp1
	Yrdc
	Ywhaq
	Yy2
	Zbtb2
	Zbtb8os
	Zc3h14
	Zc3h8
	Zfc3h1
	Zfp238
	Zfp280c
	Zfp318
	Zfp518
	Zfp62
	Zfp706
	Zfp800
	Zfr
	Znhit6

## Sheet: Venn_GO_up
Biological Process
Term	Count	%	PValue	Genes
BP00071:Proteolysis	45	8.5389	0.00020789	DPP3, USP3, USP5, IDE, ABHD4, PML, IFI30, CTSA, PSMA7, FBXL19, PSMB4, USP19, USP27X, PSMB3, PSMB2, PSMD2, 9230105E10RIK, PREPL, PSMD3, PSMD4, PSMD8, USP14, PSMD9, RHBDF2, 4933407C03RIK, UBE4A, TRIM41, UBR4, UBR3, UBR2, HERC2, TRIM62, ADAMTS7, PSMC5, PSMD13, HUWE1, SERPINB6A, KDM2A, PSMC4, PSMC3, PSMD11, PSMC2, USP20, CTSD, RNF135
BP00060:Protein metabolism and modification	99	18.7856	0.00135652	PPP2R5D, FGFRL1, IDE, PTPN23, RPLP2, USP27X, MAP3K4, RPLP0, B230120H23RIK, MLKL, MYST2, HADH, EIF2B4, TYRO3, PLXNB2, UBR4, TRIM41, UBR3, UBR2, EEF2, ADAMTS7, KDM2A, HUWE1, RIOK3, MAPK9, MGAT5, RNF135, EIF2C3, IFI30, CTSA, CDC34, PSMA7, PSMB4, PTK2, TTBK2, PPP1R16A, PSMB3, PSMB2, EIF3L, TNKS, PLXND1, RHBDF2, PTPN14, WIPI2, TRIM62, HSPBP1, PSMC5, PSMC4, VCP, SERPINB6A, PSMC3, ULK1, PSMC2, HSPA13, D…
BP00048:mRNA splicing	14	2.65655	0.00177463	TFIP11, DHX8, CHERP, SF1, UHMK1, PRPF19, PLRG1, DHX38, PRPF8, DHX16, ZRSR1, RBM14, DHX32, DHX57
BP00125:Intracellular protein traffic	38	7.21063	0.00245636	COPA, TUBB2C, MTX1, CTSA, AP2B1, NUP214, POM121, RAB43, GBF1, DYNLL2, ACTR1A, EXOC4, RABGEF1, TUBG1, VPS11, TNPO2, DYNC1H1, EHD3, EXOC1, NPLOC4, SCAMP2, KIF18B, KIF3C, DCTN4, DCTN2, BCAP31, NPC1, VCP, AP2A1, IGF2R, TSC2, TOMM40L, TUBA4A, CLIP2, COPG, GGA2, SNX10, RANBP10
BP00273:Chromatin packaging and remodeling	12	2.27704	0.00421234	HIST1H1E, EZH1, SETD1A, HIST1H2AK, TRRAP, TOX4, HIST1H4I, HIST1H3F, BAZ2A, MLL1, SUPT6H, HDAC6
BP00005:Glycolysis	6	1.13852	0.00647959	ALDOA, PKM2, HK1, BPGM, PFKM, GPI1
BP00047:Pre-mRNA processing	15	2.8463	0.00991373	TFIP11, DHX8, CHERP, SF1, UHMK1, PRPF19, PLRG1, DHX38, PRPF8, DHX16, ZRSR1, RBM14, DHX32, CPSF1, DHX57
BP00272:Phospholipid metabolism	9	1.70778	0.0260228	PLD2, ABCA7, PISD-PS2, PLCG1, PAFAH2, ABCA2, PI4KB, FIG4, PNPLA6
BP00282:Mitosis	15	2.8463	0.033013	ALS2, KIFC1, TUBB2C, CCNF, KATNB1, DRG2, ESCO2, DCTN2, TTBK2, GSK3A, ACTR1A, CDAN1, TUBA4A, CLIP2, TUBG1, DYNC1H1
BP00001:Carbohydrate metabolism	22	4.17457	0.0413861	ME1, ALDOA, SLC2A10, PTGR1, HYAL2, SORD, ACO2, G6PDX, PGD, HK1, TKT, BPGM, PFKM, GPI1, VAT1, MAN2A2, GSK3A, PKM2, GK5, GYK, HADH, PDHX
Molecular Function
Term	Count	%	PValue	Genes
MF00242:RNA helicase	9	1.70778	0.000350287	DHX8, DDX47, UPF1, DHX38, DHX16, HELZ, DDX41, DHX32, DHX57
MF00126:Dehydrogenase	15	2.8463	0.00100943	ME1, PTGR1, SORD, G6PDX, PGD, RDH1, CBR3, VAT1, ACADVL, ALDH7A1, HSDL1, ALDH2, NARFL, SPR, HADH
MF00051:Helicase	12	2.27704	0.0012478	DHX8, DDX47, RECQL5, UPF1, DHX38, DHX16, HELZ, RAD54L2, DDX41, DHX32, DHX57, ERCC2
MF00127:Reductase	12	2.27704	0.00253738	PYCRL, NDOR1, GSR, PTGR1, SORD, HSDL1, BLVRB, IFI30, SPR, RDH1, CBR3, VAT1
MF00123:Oxidoreductase	28	5.31309	0.00514658	ME1, PYCRL, ACOX1, SORD, PTGS2, PGD, G6PDX, IFI30, PRDX2, PRDX1, GSR, HIF1AN, SPR, HADH, QSOX1, PTGR1, RDH1, CBR3, VAT1, COQ6, ACADVL, NDOR1, ALDH7A1, HSDL1, PRDX6, BLVRB, NARFL, ALDH2
MF00109:Carbohydrate kinase	5	0.948767	0.00602871	PKM2, HK1, PFKM, GYK, GK5
MF00290:Other enzyme regulator	7	1.32827	0.0092234	HSPBP1, DIXDC1, PSMD13, UBE4A, PSAP, PSMD2, PSMD3
MF00107:Kinase	27	5.12334	0.016783	FGFRL1, HK1, TRRAP, PTK2, MAP3K4, TTBK2, SPEG, B230120H23RIK, MLKL, GK5, PLXND1, TYRO3, LIMK1, PLXNB2, MINK1, MAPK11, PFKM, PI4KB, ATMIN, TYK2, GSK3A, RIOK3, ULK1, PKM2, CDAN1, MAPK9, GYK, KSR1
MF00264:Microtubule family cytoskeletal protein	12	2.27704	0.0201941	GABARAPL2, KIFC1, TUBB2C, TUBA4A, KIF18B, CLIP2, TUBG1, TTLL7, DYNC1H1, DCTN4, KIF3C, DCTN2
MF00084:ATP-binding cassette (ABC) transporter	5	0.948767	0.0283282	ABCA7, ABCF3, ABCA2, ABCC1, ABCB6
MF00283:Ubiquitin-protein ligase	11	2.08729	0.02925	HUWE1, PML, TRIM41, UBR4, UBR3, 9230105E10RIK, NEURL4, UBR2, HERC2, RNF135, TRIM62
MF00100:G-protein modulator	16	3.03605	0.0299783	ALS2, ABR, ARHGEF7, IQGAP3, RANGAP1, AU040829, RGS12, GBF1, TIAM1, SGSM3, TSC2, RABGEF1, PKD1, EIF2B4, EHD3, ARHGDIB
MF00170:Ligase	17	3.22581	0.0479658	GCLC, PML, UBR4, TRIM41, UBR3, UBR2, CDC34, TTLL7, LARS2, HERC2, TRIM62, UBE2O, HUWE1, MDM2, 9230105E10RIK, NEURL4, RNF135
Pathway
Term	Count	%	PValue	Genes
P00060:Ubiquitin proteasome pathway	13	2.46679	9.26313e-06	PSMD13, PSMC5, PSMC4, HUWE1, PSMD11, PSMC3, PSMC2, PSMD2, PSMD3, MDM2, PSMD4, PSMD8, PSMD9
P00024:Glycolysis	6	1.13852	0.00156948	ALDOA, PKM2, HK1, BPGM, PFKM, GPI1
P00049:Parkinson disease	10	1.89753	0.00345554	PSMB4, PLD2, PSMD13, HSPA2, TTBK2, PSMB3, CDAN1, TOR1B, MAPK9, MAPK11, PSMA7
P00059:p53 pathway	9	1.70778	0.0212575	SIN3B, TNFRSF10B, PML, MDM2, TRRAP, FAS, APAF1, TOX4, GTSE1
P00013:Cell cycle	4	0.759013	0.0355186	PSMD13, PSMD11, PSMD3, PSMD4
P04393:Ras Pathway	7	1.32827	0.0431365	PLD2, MAP3K4, GSK3A, TIAM1, MAPK9, MAPK11, RHOD

## Sheet: Venn_GO_down
Biological Process
Term	Count	%	PValue	Genes
BP00031:Nucleoside, nucleotide and nucleic acid metabolism	126	22.4199	2.75777e-09	HMGN3, LMO4, DTYMK, RASL2-9, SNRPD1, CBX3, RNASEH1, CITED2, ISG20, EBNA1BP2, SFRS7, TOP1, DDX18, BC031441, PSIP1, DDX21, PTBP2, LSM1, FAM164A, TWIST2, GNL3, TWIST1, H1F0, SNRPA1, HNRNPA2B1, EMX2, FOXN2, SPIRE1, ISG20L2, PPARGC1A, HNRNPR, DCLRE1A, HOXD8, TRMT11, ZFP518, ZFP280C, FOXG1, CSNK1G3, TAF9B, SNRPB2, CMPK1, HNRNPK, MEIS2, HOXA4, TDRKH, TCF4, LHX9, HELLS, KLF6, SMAD9, SUB1, SMAD7, PAIP2, K…
BP00203:Cell cycle	40	7.11744	0.000321148	HMGN3, RASL2-9, FKBP3, CETN3, TSPYL4, TOP1, SUMO2, SET, NUDCD2, MAK16, DKC1, PPP3CC, FBXO4, MYC, TERF1, CSNK1A1, ESCO1, CCNI, PDS5A, NUCKS1, CCNH, CDK8, FOXN2, GAS2, SPIRE1, HGF, CDKL3, TUBGCP2, UBE2B, ZFR, FOXP1, RPS6KA6, MNAT1, HDAC2, PAPD4, FYN, FOXG1, YWHAQ, CSNK1G3, SEPT7
BP00040:mRNA transcription	64	11.3879	0.00379341	BMI1, HMGN3, LMO4, DEK, CITED2, TOP1, WBP5, OSR1, GTF2A2, BC031441, ZFP238, PSIP1, GATAD1, FAM164A, NR2F2, MYC, TWIST2, TWIST1, SSBP2, TBX15, EMX2, FOXN2, MBD2, PPARGC1A, MURC, HOXD8, POGK, ZFP518, ZFP280C, FOXG1, ZFP62, IRX2, TAF9B, HNRNPK, MEIS2, HOXA4, PER2, PPP3CC, BCL6, TCF4, LHX9, HELLS, KLF6, CEBPB, SMAD9, SMAD7, CEBPD, SUB1, SMAD6, CEBPG, KLF10, NR4A2, SNAI2, FOXP1, HDAC2, ID2, RNF2, ID3,…
BP00048:mRNA splicing	13	2.31317	0.00447319	SNRPA1, SNRPB2, HNRNPA2B1, GRSF1, SNRPD1, HNRNPR, HNRPLL, SFRS7, TRNAU1AP, RBMXRT, PTBP2, RBM39, LSM1
BP00055:rRNA metabolism	7	1.24555	0.00643529	DIMT1, MURC, EXOSC6, DKC1, MPHOSPH10, NOP58, NCL
BP00047:Pre-mRNA processing	15	2.66904	0.00877557	SNRPA1, PAIP2, SNRPB2, HNRNPA2B1, SNRPD1, GRSF1, HNRNPR, HNRPLL, SFRS7, TRNAU1AP, HNRNPK, RBMXRT, PTBP2, RBM39, LSM1
BP00211:Miscellaneous	10	1.77936	0.00971107	SUMO2, 4932412H11RIK, LRCH2, NIP7, ACYP1, CDC73, PPIL5, EIF3M, PNN, CCAR1
BP00034:DNA metabolism	15	2.66904	0.0127827	CSNK1A1, NBN, HMGN3, DTYMK, TSPYL4, TOP1, 2700007P21RIK, MNAT1, DCLRE1A, SET, CSNK1G3, THAP2, RBPJ, PARP2, TERF1
BP00282:Mitosis	16	2.84698	0.0143056	CSNK1A1, ESCO1, CCNI, PDS5A, NUCKS1, CDK8, HGF, CDKL3, UBE2B, SUMO2, NUDCD2, PAPD4, DKC1, PPP3CC, CSNK1G3, SEPT7
BP00172:Other neuronal activity	9	1.60142	0.0155939	OGFRL1, FKBP3, MSI2, SCG5, BASP1, PRKG2, CALCRL, HOMER1, FEZ2
BP00077:Oxidative phosphorylation	6	1.06762	0.0338125	NDUFB4, NDUFA6, CYCS, NDUFC2, NDUFC1, COX17
BP00207:Cell cycle control	17	3.02491	0.0357457	CCNI, CCNH, FKBP3, CDK8, FOXN2, GAS2, CDKL3, UBE2B, FOXP1, MNAT1, RPS6KA6, HDAC2, FYN, FOXG1, PPP3CC, FBXO4, MYC
BP00044:mRNA transcription regulation	46	8.18505	0.0366247	BMI1, ZFP62, IRX2, TAF9B, CITED2, MEIS2, HOXA4, BC031441, ZFP238, PSIP1, PER2, TCF4, NR2F2, GATAD1, MYC, LHX9, TWIST2, HELLS, TWIST1, KLF6, SMAD9, SSBP2, TBX15, CEBPB, CEBPD, SUB1, SMAD7, SMAD6, CEBPG, KLF10, EMX2, NR4A2, FOXN2, SNAI2, PPARGC1A, FOXP1, HOXD8, HDAC2, ID2, ZFP518, RNF2, FOXG1, ID3, KLF2, KLF4, KLF3
BP00179:Apoptosis	20	3.55872	0.0385712	CFLAR, CEBPB, PDCD10, SGPP1, CYCS, TSPYL4, ZFR, SUMO2, BDNF, TMEM47, SET, OAZ1, HNRNPK, HDAC2, 1110067D22RIK, BCL2, PDCD5, MYC, THOC1, EBAG9
BP00119:Other intracellular signaling cascade	11	1.9573	0.0398106	SMAD9, SMAD7, SNX14, SGPP1, PPP2R5A, SMAD6, PPP3CC, PRKG2, DOCK11, COX16, GNL3
Molecular Function
Term	Count	%	PValue	Genes
MF00042:Nucleic acid binding	108	19.2171	5.4043e-08	HMGN3, VPS54, EIF5B, SNRPD1, CBX3, RNASEH1, ISG20, SFRS7, TOP1, DDX18, BTBD1, TIGD2, DDX21, PTBP2, LSM1, TWIST2, RPL36AL, TWIST1, H1F0, SNRPA1, DARS, HNRNPA2B1, EMX2, FOXN2, ISG20L2, HNRNPR, RSL1D1, PA2G4, HOXD8, TRMT11, WDR89, SERBP1, EIF2S2, FOXG1, UBA52, SNRPB2, TAF9B, RPS26, HNRNPK, MEIS2, HOXA4, HTATSF1, TDRKH, TCF4, LHX9, HELLS, RARS2, SUB1, MPHOSPH10, DDX5, FOXP1, 2700007P21RIK, HDAC2, H3F…
MF00069:Ribonucleoprotein	11	1.9573	5.14803e-05	TRNAU1AP, HNRNPK, LARP7, HNRNPA2B1, SNRPD1, MPHOSPH10, MSI2, NOP58, RBMXRT, PTBP2, HNRPLL
MF00036:Transcription factor	66	11.7438	0.0069619	BMI1, GTF3A, LMO4, CITED2, GABPB1, SPRY1, WBP5, OSR1, GTF2A2, BC031441, ZFP238, PSIP1, GATAD1, FAM164A, NR2F2, MYC, TWIST2, TWIST1, TBX15, EMX2, FOXN2, PPARGC1A, MURC, PA2G4, HOXD8, ZFP518, ZFP280C, FOXG1, RNF138, C1D, GM13154, ZFP62, IRX2, TAF9B, FHL2, 2610008E11RIK, MEIS2, HOXA4, PER2, BCL6, TCF4, LHX9, MLLT3, KLF6, CEBPB, SMAD9, CEBPD, SMAD7, SUB1, SMAD6, CEBPG, KLF10, NR4A2, SNAI2, FOXP1, MNA…
MF00068:mRNA splicing factor	8	1.42349	0.00936998	SNRPA1, SFRS7, HTATSF1, SNRPB2, SNRPD1, RBM39, PTBP2, LSM1
MF00065:mRNA processing factor	9	1.60142	0.0160706	SNRPA1, SFRS7, HTATSF1, SNRPB2, SNRPD1, RBM39, PTBP2, LSM1, HNRNPR
MF00039:Other transcription factor	17	3.02491	0.0165472	CEBPB, TBX15, SMAD9, SMAD7, CEBPD, CEBPG, SMAD6, FOXN2, FOXP1, MURC, GABPB1, PA2G4, SPRY1, ID2, FOXG1, ID3, RBPJ
MF00089:Mitochondrial carrier protein	6	1.06762	0.0248454	SLC25A4, SLC25A24, SLC25A5, MTX2, TIMM9, CYCS
MF00239:Phosphatase inhibitor	4	0.711744	0.0265849	SET, ANP32B, ANP32A, PPP1R14B
MF00097:G-protein	13	2.31317	0.0373861	AGBL3, GTPBP4, RAB3C, GTPBP8, RASL2-9, RRAGC, RND3, KRAS, GNG10, RAC1, RHOB, SEPT7, GNG5
Pathway
Term	Count	%	PValue	Genes
P00060:Ubiquitin proteasome pathway	8	1.42349	0.00985881	UBE2N, UBE2D3, UBE2D2, UBA2, WWP1, UCHL5, UBE2H, UBE2B
P00057:Wnt signaling pathway	17	3.02491	0.0138618	CSNK1A1, SMAD9, PPP2R5A, EDN1, FZD1, FZD2, PCDH19, HDAC2, PLCB4, HOXA4, GNG10, PPP3CC, CSNK1G3, MYC, GNG5, HELLS, CDH11
P00007:Axon guidance mediated by semaphorins	5	0.88968	0.0328795	FYN, RAC1, RHOB, FERT2, SEMA3A

## Sheet: Heatmap_Gene
Heatmap DDonly genes
up	down
Laptm4a	Emx2os
Gcsh	Csnk1a1
Glrx3	Jag1
Gclc	Rnf114
Dennd2c	Il17d
Eda2r	9030025P20Rik
Taf7	Mrpl18
Mettl6	Fbxl22
Mdm2	Cnn3
Tnfrsf10b	Efemp1
Trp53inp1	Fam126a
Odc1	Anp32a
Snx5	Snrpd1
Ywhae	Fubp1
Fbn1	Dynll1
6030422M02Rik	Ubl3
Kbtbd11	Snapc3
Unc13c	2510049I19Rik
Lama4	Kcmf1
Lin28b	1110004E09Rik
Sftpb	Bola1
Sephs1	H2afz
Dazap2	1810063B05Rik
Erc2	Cox6a1
Xist	Pgrmc1
2700078K21Rik	Fam50a
Ddx47	Uqcrq
B3gnt1	Bola2
Pgam1	Ran
Limd1	Rps13
Hist1h4i	Gng10
Ada	Enoph1
Srd5a1	G3bp1
Cdkn1a	Slc25a5
6530418L21Rik	Timm17b
Slc19a2	Ap2a2
Carhsp1	Hs6st2
Gtse1	Cpsf6
Egln3	Vim
Cbr3	Twist2
Ube2o	Wtip
Osgin1	Tpst2
Rab40c	Exosc6
Traf4	Ppp1r3d
Dctpp1	3110009E18Rik
Cox6b1	BC031181
Txn1	Ndufb11
Tprgl	Rpl19
Tap1	Reep5
Bok	Rbm8a
Hn1	Serpinh1
Polr2l	Pdia5
Eif1ay	Snrpf
Yy1	Ankrd37
Col4a3bp	9530008L14Rik
Cdo1	Ggct
Fads1	Csf2rb2
Matn2	Cass4
Epha4	Kcnma1
Cdc2l6	Cflar
2010106G01Rik	Anxa9
Ndufaf1	Krtcap3
Hgsnat	Gm2382
Lancl2	Dhrs11
Abca1	1700086O06Rik
Sacs	Dtd1
Hist1h1b	Apba1
Ctnnd1	Ccdc107
Asb1	Coq3
Fbxw7	Reep6
Fkbp9	Adsl
Aggf1	Gys1
Anapc5	1810032O08Rik
Wrb	Slc7a5
D17Wsu92e	Rhoj
Eif4ebp2	Ndufa8
Cd81	Pcbp3
Msn	Dlat
Ptpn14	Rmnd1
Hspa8	Lancl1
Klhdc5	Ccdc137
Yap1	6330416G13Rik
Gins3	Gata3
Mybl1	Irx3
A830007P12Rik	Tmem176b
Fads2	Begain
Insig1	Irf5
Endod1	Gng8
5830417I10Rik	Nrbp2
Grit	Qsox2
Depdc5	Rasl11b
Lig1	2900006K08Rik
Acaca	Bbc3
Abl2	Ankrd24
Chst11	Dand5
Cramp1l	Mettl14
Plxna2	Dcps
Dip2b	Gm11818
Igf2r	Eed
Mll1	5133400G04Rik
St6gal1	Auh
Mcm10	Gnl2
Il6ra	Brp44l
Lss	Chic2
Kif24	Eif1b
Gprc5b	Macrod2
Cltc	Arglu1
Ctnnb1	Ccdc115
Hmgcr	4932412H11Rik
Birc6	5730408K05Rik
Col12a1	2310004N24Rik
Wnk1	Anapc13
Acat2	Bri3bp
Tmem2	Rbp1
Fam20b	Cdc42bpa
Phlpp2	Fst
2900097C17Rik	Adam22
Rnf145	Cdkl3
Dhx8	Arhgap29
Mcm5	Fam107b
Mcm7	Fgf10
C230096C10Rik	Sgpp1
Lbr	Ubxn2b
Itpr1	Meis2
Rab31	Foxp1
Gtf3c4	Samd4
Med18	Spry1
Eftud2	Mxra7
Flna	Msi2
Glg1	4930432O21Rik
Mgat5	Ppapdc2
Herc2	1190002H23Rik
Rad54l2	1600012F09Rik
D930015E06Rik	2310003F16Rik
Wdr1	9130401M01Rik
Pcyt1a	Hint1
Zfp382	2610036L11Rik
Dync1h1	Brp44
Trrap	Cno
Ubr4	Irx2
Extl3	Pdcd5
Slc35e1	Ndufc1
Usp13	Pno1
Prdm10	Exosc3
Sec24b	Pole4
Timp2	Rps20
C330019G07Rik	Gtf2a2
Abhd2	Mrp63
Tmem127	Mrpl52
Zfp275	4921524J17Rik
Klhl11	1190007I07Rik
EG240055	Atf4
Ror1	Pqbp1
Rab3d	1700021F05Rik
Sort1	Ccdc59
Prrg4	1700019E19Rik
Kbtbd4	Snhg6
Tnfrsf23	Chmp2a
Tuba1c	Ndufb4
Kcnj15	Atp6v1g1
Ptprj	2310009B15Rik
Fat1	Cox17
Pcdhb9	Gng5
Rnf169	Serf1
Lpin1	Ndufc2
Serpine2	Trappc6b
Zfand2a	Hspb11
Palb2	Ndufa6
Trp53bp1	Ndel1
Gfra1	Hint3
Mfn2	Arfgap3
Ism1	1110003E01Rik
Dlg3	Gmds
Enpp1	Lgals3
Gnb4	Pdcd4
Nek9	2900064A13Rik
Dpy19l3	Plagl1
Fli1	Tcea1
Diap1	Rheb
Arf3	Ccdc90b
E2f3	Nfu1
Abcb10	Rab28
Ankrd50	Tmem126a
Dgcr8	Serp1
Adam19	Tmem38b
Slc6a6	9430016H08Rik
Ets1	Thap1
Cd300lb	Kti12
Scara3	Ift20
Rgs9bp	Cetn4
Clspn	BC024479
Tcf20	C030044B11Rik
St3gal1	Apbb1ip
Lrrc8b	2300009A05Rik
Zswim6	Dcun1d5
Prkacb	Lysmd2
5730590G19Rik	rp9
Sin3a	Coq10b
Eif2ak2	Papd4
Mastl	Fahd1
Nav3	Gbas
Nipal1	Dnajc21
Lamc2	Fam36a
Ptpre	Ebag9
Rgs16	Mbnl2
Sgk1	Ccdc112
Tmx4	Ccdc122
Ncaph	Rbm39
Lsm11	Wipi1
Gnpat	Mapksp1
Ndst1	Cdk8
Lrrc8e	Bxdc2
Lass4	Cox16
Lrrc8c	Eny2
Sfxn2	Paip2
Slco2a1	Commd3
Xrcc2	Cenpv
Inpp4a	Zcrb1
Med1	Hmgn3
1600002H07Rik	Sltm
Top3a	Gtf3a
Pask	Znhit6
Obfc1	Txndc17
Ddx17	Xrcc6bp1
Gtf3c2	Hoxd8
Eme1	Strn3
Trib1	Tusc1
Zmym3	Rnft1
Mtmr11	Senp6
Srrm2	Sec31a
Rfx3	Emx2
Hist1h1e	Edn1
Scyl2	Jdp2
Acta2	Fam59a
Athl1	Gtpbp8
Slc38a6	Chac1
Dpy19l4	4930455C21Rik
Appbp2	Kctd15
Nipa2	Dync2li1
Fbxo30	Fibin
Impad1	Fyn
Ipo11	Isg20
Prkar2b	Mid1ip1
Ppt1	Pawr
2210023G05Rik	Pigp
St3gal4	Ndnl2
Acox1	Armcx2
2010011I20Rik	Cebpb
Copg	Acyp1
Cmtm7	Nudt9
Emp3	Ttc32
Myl6	Rshl2a
Atp5l	Ankrd1
Pi4kb	Cited2
Mlx	Myc
Npc1	Rnaseh1
Psen1	Cnksr3
Slc25a44	Id3
Edc3	Klf2
5730403M16Rik	Klf4
1500031L02Rik	Fam164a
9030617O03Rik	Nov
Lrrc49	Usp8
Ephx1	Suv420h1
M6pr	Wdr34
Prepl	Ngrn
Tnks	Rnf113a2
Parp4	Surf6
Hsf2	Nop14
Bpgm	Acbd5
Gclm	Jmy
Gyk	Eif3a
Diablo	Lrrn4cl
AA408296	Cdc2l1
Srp68	Brd7
Med20	Ccdc55
Coq6	Ppig
D10Wsu52e	Akr1b3
3110002H16Rik	6330416L07Rik
Bod1	Sycp1
Gabarapl2	2700089E24Rik
Eif3h	Dnajc1
Nsmce1	Zfp238
Psmb4	Leo1
Psmd8	Uba52
Prpf19	Mfap1a
Dcaf12	Fchsd2
Vcp	Ints6
Psmb2	Esco1
Prdx6	Terf1
Sqrdl	Cebpg
Drg2	Fip1l1
Dctn2	Poli
Psma7	l7Rn6
Psmb3	Pdcl3
Psmb6	Hnrnpa2b1
Psmd4	Wbp5
Pycrl	Agbl3
Actl6a	Zfc3h1
Psmc2	Ppil4
2310004I24Rik	Loh12cr1
Gsta4	BC005624
Riok3	Bcas2
Pdhx	Ccdc109b
Rit1	2410004B18Rik
Mapk9	Fam53a
Psmd11	Morf4l2
Psmc4	Sec62
Me1	Zrsr2
Zwint	Vps26a
Slc7a11	Syf2
Zc3hc1	Gm15427
Plrg1	Txndc16
Urod	Lhx9
Trappc2l	Thap2
9230105E10Rik	Tmco1
Nicn1	1110034A24Rik
Gemin4	Fzd1
BC057893	Fam134b
Adipor2	Foxn2
Ptgs1	Cacna1c
Fktn	Epb4.1l2
Dnajc18	Tpm1
Pdpn	Zbtb2
Glb1l	P4ha3
Myst2	Arl6ip6
Cyb5r4	Gt(ROSA)26Sor
Gtf2a1	Ube3a
Cyb5d2	Oaz1
Gas2l3	Ppil5
Large	Pdzd8
Dyrk1a	Anp32b
Dstn	Cthrc1
Gnptab	Baiap2l1
Gpr125	Gpatch4
Adam23	Golim4
Layn	Pnn
Clcn5	Prpf38b
Atp10d	Ccdc72
Casp3	H3f3a
Ccnt1	Lxn
Pi4ka	Hnrnpr
Cbl	Pdap1
Ipo9	Smarce1
Slc35e3	Ndufaf2
Mapre2	Comt1
Htt	C1r
Arhgef5	Ppp4r2
Pcyt1b	Rbm45
Ints7	Serbp1
Snrnp200	Ube2b
Rad54l	Sumo2
Phka2	Rhox8
Rrn3	Plekha4
Wdhd1	Rbmxrt
Bard1	Rshl2b
Phtf1	Dr1
Cpd	Nagk
Uhmk1	Chkb
Sesn1	Tm2d1
Pros1	Tmem42
Kpna6	Hspb6
6330578E17Rik	Aasdhppt
Mapk14	Ift57
Polh	Ndufaf4
Pcyox1	Llph
Nkain1	Rbm17
Parva	Lyar
Nup50	Ebna1bp2
Klhl9	Timm9
Mmd	Npm3
Bgn	Rab3c
Cd99l2	Polr3d
Ddb1	Trnau1ap
Snx19	Rpia
Trappc10	Eif3j
Pramef8	Uck2
Gk5	Luc7l2
Atp6ap1	4933424B01Rik
Eif2b5	Dnajc19
Eif3l	Mtrf1l
2810452K22Rik	Ppp2r5a
Vdac1	Sfrs7
Ndufa9	Fkbp3
Nlk	Capza2
Ptdss1	Memo1
Prdx1	Isy1
Skp1a	Nsmce4a
Utp20	Igfbp7
Ammecr1l	Nudt19
BC055324	Pa2g4
Tmem183a	Ndufb2
Mr1	D030056L22Rik
Psme4	Uchl5
Exoc1	Pfdn1
Ints9	Sh3yl1
Rbl2	Snrpa1
Chd8	Irak1bp1
Huwe1	Mrpl32
Prpf8	Apip
Ap2b1	Ufm1
Lpcat1	Mettl5
Suv39h1	Fam188a
Uba1	Rpl13
Tbcd	Tmem159
Slc39a9	Polb
Med23	Ercc6
Opa1	Fndc3b
Exoc4	Pctk2
Zw10	Kctd14
Atg2b	Sorbs1
Tbc1d14	Csda
Ttc26	2900073G15Rik
Sdha	Cmpk1
Rfc5	Basp1
Crybg3	Marcks
Rcor1	Bcl7c
Slc43a3	Ppp1r14b
A230067G21Rik	Camk2n2
Dnalc1	Mex3d
Asxl1	2310016M24Rik
Pole	Clta
Polr2a	Robld3
Usp54	D4Wsu53e
Nup133	Gnas
Ttll4	Ndufa1
Rnf24	Slc30a7
Ncapd3	Cdc42se1
Stxbp4	Irak1
Ttf2	Ddx50
Fam55c	Dlk1
Arl6ip1	Irx5
Hadhb	Arhgap17
Gm9199	Maged2
Fgfr1op	Avpi1
Dennd5a	Fdx1l
Slc39a6	Jund
Crlf3	Vegfb
Metap1	Trappc5
Med29	Ino80e
Slc2a10	Sf3b4
Tubb2c	Obfc2b
Ikbkap	Hook2
Pmpca	Ccdc9
Sephs2	Nfkbil1
Polr1b	Foxg1
Tyms	Wbscr22
Thoc3	Gar1
Slc25a13	Sepw1
Rnf38	Rpl29
Mkln1	Ctbp2
Zfp59	Ficd
D16H22S680E	Fkbp2
Arnt2	Irx1
Rnf135	Leng1
Dixdc1	Ddrgk1
Fam115c	Rpl13a
Asah2	Tsfm
Stom	Taf15
Camk2g	Zfp830
Usp27x	Nudt21
Ddx11	Eef2k
Arrb1	Itga11
Fanca	Cbx4
Nup214	Sh3bp5
Plcg1	Stc2
Hdac6	Dtymk
Mapkbp1	Arhgef10
Tubgcp6	Snap47
Sfxn5	Trmu
Lrp8	Nudt17
Pola2	Nol12
Ogdh	Pacsin2
Spry4	2810408M09Rik
Mrpl49	3110082I17Rik
Bbs9	Cnot3
Ehd3	Gm10070
Acvr1b	Sox12
Clptm1	Dennd1a
Dgat1	Ier2
Ap3s2	Twist1
Ndor1	Snrnp35
Abcf3	Tmem106c
Abhd4	1300018I17Rik
Gabarapl1	Trip6
Slc48a1	Wasf3
Ube4b	R3hdm2
Tcirg1	Npas3
Mocs1	Srgap3
Snapc2	Rpp21
Tctn2	B630019K06Rik
Dhx57	Tmem47
Gab2	Mitd1
Mocos	Necap1
Ptk2	Ubxn8
Fbxo34	Phax
Ptgr1	Aptx
Gsr	E130311K13Rik
Tmem19	Ddit4
Mfsd6	Cir1
Cachd1	2810008D09Rik
Ei24	1810007M14Rik
Xkr8	Zfp760
Mapkapk3	2310007H09Rik
Anapc2	Bphl
1300018I05Rik	Atg3
Actr1a	Ccnh
Dpp3	4930430F08Rik
Fto	Eapp
Tnpo2	Fam18b
Abcc1	Cfdp1
Lgals3bp	Kin
Nploc4	Mrps31
Cd320	Mtpap
Fam115a	Atp2a1
Dhx32	1700024P16Rik
Polr3a	Gal3st4
Qars	Invs
Nek2	Rwdd3
Nup85	6030458C11Rik
Psmd2	Fhl2
Tuba4a	Murc
Slc12a7	Tigd2
Srxn1	Faim
Eif3b	Atl1
Tor1b	4932415G12Rik
Tubb5	Arhgap5
Zfp180	Sec16b
Hpcal1	N6amt1
Ap4m1	Efha2
Asf1b	2810021B07Rik
Fryl	Azin1
Fam18a	Cdc42ep3
Mms19	Fancf
Phc3	Nrbf2
Pik3r4	Cep78
Gusb	Ddx5
Fam134c	Hdgfrp3
Hif1an	Gm13889
Lars2	Defb41
Zfp41	Wdr43
Sidt2	Rgs19
Rabgef1	5033414D02Rik
Srbd1	Eid2
Vps8	C130022K22Rik
Tspan14	5830433M19Rik
Adar	Xpa
Uhrf1bp1l	Cwc15
Wipi2	Dnajc8
Sap130	Srp19
Smpd4	Pibf1
Pisd-ps2	Pnpt1
Npr2	Apoo
Tctn3	2610305D13Rik
Tomm40l	Wbp4
Wrap53	Cenpk
B230120H23Rik	Nufip1
Zfp28	Sclt1
Fancc	Adh5
Rtel1	Clint1
Tpcn2	Srp14
Upp1	Gm114
Zfp445	2810004N23Rik
Ccdc123	Bcl10
L3mbtl2	Ifngr1
Arfgap1	Cyp4v3
Fam40a	Ccdc53
Smg5	Tmem179b
Scamp5	Ccl9
Prpsap1	1110067D22Rik
Tbl3	Mnd1
Vamp8	Lsm8
Rnu1b2	Dctn6
Gpld1	2610021K21Rik
Gpr161	Ifrd1
Mars	Lmo4
Mbtps1	Dimt1
Nup62	Nop58
Glul	Pstk
Cd276	Lyrm2
Rassf3	Smap1
Tuba1a	Lyrm5
Cdc25a	Rg9mtd1
Dlst	Mbd2
Xpo6	Vkorc1l1
Zdhhc3	Pxmp3
Slc5a6	Acot2
Sdhd	Amn1
Ly6e	Pnrc2
Ppp2r1a	Ttc17
Cd14	Crls1
Wdr19	Mdfic
Als2	Prdm5
Atp6v1a	Srfbp1
Cep120	Tfam
Mtmr4	Dus4l
Ubr2	Lactb2
Ssx2ip	Zfp1
Sord	Ltv1
Ttll7	Mnat1
Tox4	Surf2
	Ppp3cc
	Rps26
	Als2cr4
	Pin4
	Tmem9b
	Ncl
	Nexn
	Morc3
	Napg
	Pgam5
	Stxbp3a
	Parp2
	Rpgr
	Zfp51
	Rnpc3
	Fbxo8
	Zxda
	Ccdc32
	2810002N01Rik
	A630033E08Rik
	2210012G02Rik
	Gps2
	Ogg1
	Surf1
	Fgfbp3
	Psmf1
	Aga
	Acaa1a
	Mrps5
	Med27
	Prpsap2
	Pard6a
	Stx18
	Top1mt
	Kri1
	4930578N16Rik
	Fam122a
	2610008E11Rik
	F3
	Gdnf
	D9Ertd402e
	Iqck
	Gpr85
	Zfp187
	Pcmtd2
	Slc22a5
	Lrrc27
	4933421E11Rik
	Ctage5
	Chrac1
	Glrb
	Scnm1
	Armcx3
	Atg5
	Aldh6a1
	Amacr
	Gopc
	Brf2
	Fbxl12
	Dnaja3
	Trim66
	Myd116
	Wwtr1
	Ick
	Mrpl44
	Cpox
	Alg2
	Cyb5r1
	Psph
	Ddit3
	Nupr1
	Herpud1
	Ets2
	Ptx3
	Mknk1
	Slc3a2
	Rpp14
	Derl2
	Zfp57
	Tmem150
	Trub1
	Nr4a2
	Gm129
	Ccdc130
	Vegfa
	Irf2
	Tspyl4
	Zc3h8
	Slc1a4
	Tars
	Tmem154
	Nfil3
	Tnfrsf11b
	Snx26
	Antxr2
	Lsm14a
	Xpot
	Mtrr
	Slc7a1
	Kif3a
	Lrrfip2
	Gadd45a
	Rad52
	Metapl1
	Napb
	Trim39
	BC003331
	Rfesd
	Tnnc1
	Pde6d
	Acvr1
	Zbtb10
	Fbxl7
	Mamdc2
	Ssbp2
	Cdk5rap3
	Elp4
	Erp44
	Fkbp11
	1500011K16Rik
	1110038B12Rik
	1810029B16Rik
	Eif3g
	Dci
	Chka
	Cox18
	Nme6
	Chmp4b
	Clpp
	Rpl10a
	Rpl6
	Rpl35
	Tmed9
	Qdpr
	Mrps9
	Prkrip1
	Smn1
	C80913
	Rnd1
	Rps21
	Ormdl3
	Sec61b
	Tle1
	Hagh
	Hscb
	Rps12
	Rchy1
	Erlin1
	Leprotl1
	Phf10
	Gorasp2
	Fam96a
	Dnajb9
	Bet1
	Dnajb11
	Sec11c
	Hsp90b1
	H47
	Spcs2
	Car6
	Gfpt1
	Ppapdc1b
	Nucb2
	Tspyl2
	Tfg
	Cog3
	Naaa
	Mcfd2
	Tmed2
	Tmem50b
	Max
	Ssr2
	Pdia3
	Srp9
	Rpl34
	Timm10
	Vps28
	Taf13
	Nsmce2
	Txndc11
	Nars2
	Rpp40
	Rsad1
	Med10
	Rnf149
	Isg15
	Slc25a4
	Tctex1d2
	Rpl11
	Dync1li2
	Cln8
	Fam82a2
	Cggbp1
	Mcc
	Mras
	Obfc2a
	Hoxa1
	Ik
	Rab18
	Tbpl1
	Tmem66
	Tm2d2
	Ttc33
	Bpnt1
	Stam
	St7l
	Gem
	Caml
	Luc7l
	Snrnp48
	Uvrag
	Zfp263
	Pkp2
	Tmem219
	Gemin8
	Ttc1
	Cox5b
	Snrpc
	Ube2j1
	2010012O05Rik
	Hmgb2
	5930416I19Rik
	Vkorc1
	3200002M19Rik
	Dnttip2
	Spire1
	Ptbp2
	1500011B03Rik
	Gm9104
	BC003885
	Fbxo4
	Coq2
	Grinl1a
	Las1l
	Ak5
	Nek6
	Pus7
	Arl3
	Sbds
	Bxdc5
	2900010J23Rik
	Gtf3c6
	Rer1
	Ube2d3
	Ociad1
	Dusp12
	Dnajc24
	Nudcd2
	Mettl9
	Rras2
	Seh1l
	Snx14
	Ssu72
	Tmeff1
	Mis12
	EG434371
	Gm7027
	Hist2h2be
	Rpl21
	Pigy
	Rragc
	Zfp706
	Rtcd1
	Ywhaq
	Mtap2
	Il15ra
	Tmem80
	Dcp1b
	Ydjc
	Zfp647
	Zfp688
	Phactr2
	Gabrb3
	Itgam
	Gm5934
	Nkx2-1
	Cdr2
	Hmgb1
	Hnrnpk
	Adamts5
	Farp1
	Dlk2
	Gas2
	Rnf144a
	Siglecg
	F2r
	Lphn2
	Slc1a3
	Pdk1
	Dlgap2
	Bcl2
	BC021785
	Adamts1
	BC032203
	Arid5b
	Hivep2
	Daam1
	Hlf
	Slc30a1
	Klf6
	Fn1
	Per2
	Fgfr2
	Zfp521
	Igf1
	Cpeb4
	Mllt3
	Tcf4
	Hdac9
	Eps8
	Lrrc16a
	Kcna4
	Pcdh19
	Cacnb2
	4930473A06Rik
	Fam110c
	Arhgef9
	2700007P21Rik
	Grem1
	Snai2
	Mtcp1
	BC031441
	Usp6nl
	Gm4769
	Mitf
	Thbd
	Wdr60
	Ube2h
	4933407H18Rik
	BC049807
	Cep135
	Rsf1
	Skil
	Ccni
	Bmp2k
	A630047E20Rik
	Gpr149
	Mtus1
	Styk1
	Akap9
	Gorab
	Htatsf1
	Eea1
	Ppp1r12a
	Dclre1a
	Zfp800
	B230219D22Rik
	Nsbp1
	Rsrc1
	Bmi1
	Zfr
	BC002199
	Camk2d
	Lhfp
	Prss23
	Eif5b
	Larp7
	Sh3kbp1
	Rdx
	Top1
	Rps6ka6
	Fmnl2
	Ebf3
	Cytip
	Osbpl3
	Magi3
	Setbp1
	Mylip
	Lrch2
	Prrx1
	Slc25a24
	Tnik
	Nudt6
	Cdh11
	Golga3
	Tubgcp2
	Plcb1
	Zfp318
	Tnfaip3
	C130038G02Rik
	Nrg1
	Sdc2
	Zfpm2
	Snapc5
	Serpina4-ps1
	Zfp518
	Zfp677
	Pigw
	Fam65b
	Rasl11a
	Rps17
	Hcn1
	Wwox
	Mrpl20
	Wdfy1
	Rasl2-9
	2010015L04Rik
	Adck2
	Bcdin3d
	Neat1
	Serhl
	Cyr61
	Fam46b
	Narf
	6030446N20Rik
	Exoc6
	Nmnat3
	Ccdc57
	Erich1
	Fkbp1b

## Sheet: Heatmap_GO_up
Biological Process
Term	Count	%	PValue	Genes
BP00125:Intracellular protein traffic	52	8.76897	3.68199e-06	SEC24B, KIF24, TUBB2C, CLTC, AP2B1, ACTR1A, RABGEF1, TUBB5, TUBA1A, DYNC1H1, TUBA1C, SCAMP5, OPA1, ACTA2, IPO9, DCTN2, MFN2, MTMR11, NPC1, VAMP8, ARRB1, IGF2R, CD99L2, KPNA6, TUBA4A, SORT1, ERC2, COPG, UNC13C, SNX19, GLG1, RAB3D, SNX5, RAB40C, NUP214, NUP50, EXOC4, ACTL6A, GTF3C2, TNPO2, MTMR4, EHD3, EXOC1, NPLOC4, HTT, IPO11, RAB31, NUP62, VCP, ARF3, TOMM40L, SCARA3
BP00203:Cell cycle	50	8.4317	8.41363e-06	GAS2L3, ALS2, E2F3, KIF24, CCNT1, TUBB2C, GTSE1, MCM7, DDX11, ACTR1A, TUBB5, PSMD2, PRKACB, MYST2, DYNC1H1, TUBA1A, TUBA1C, FANCC, ZW10, ANAPC2, RBL2, ACTA2, LIG1, POLE, NUP85, MCM5, NCAPD3, DCTN2, RFC5, TBCD, TOP3A, TUBA4A, MAPRE2, EMP3, SKP1A, POLA2, MYBL1, SESN1, FBXW7, 2700078K21RIK, TNKS, ACTL6A, 6030422M02RIK, PTPRE, L3MBTL2, DRG2, YWHAE, CDC25A, CDKN1A, ABL2
BP00034:DNA metabolism	21	3.54132	0.000280938	MMS19, XRCC2, POLH, RCOR1, DDB1, LIG1, POLE, POLA2, RAD54L, TTF2, MCM5, RFC5, TYMS, TRP53BP1, MCM7, TOP3A, TNKS, 6030422M02RIK, SRBD1, RTEL1, FANCC
BP00290:Lipid metabolism	13	2.19224	0.000917913	ADIPOR2, PI4KA, MMD, EPHX1, PI4KB, LPIN1, ASAH2, ST3GAL1, PLCG1, LASS4, ST3GAL4, PTDSS1, MED1
BP00282:Mitosis	21	3.54132	0.0011139	ALS2, ANAPC2, KIF24, ACTA2, TUBB2C, SKP1A, DRG2, NCAPD3, DCTN2, DDX11, 2700078K21RIK, TBCD, ACTR1A, TUBB5, TUBA4A, ACTL6A, PRKACB, TUBA1A, DYNC1H1, TUBA1C, ZW10
BP00206:Chromosome segregation	10	1.68634	0.00192432	DDX11, TUBB2C, TUBB5, TUBA4A, SKP1A, DYNC1H1, TUBA1A, TUBA1C, DCTN2, ZW10
BP00036:DNA repair	12	2.02361	0.0032911	MMS19, TRP53BP1, XRCC2, POLH, DDB1, LIG1, POLE, RAD54L, SRBD1, TTF2, RTEL1, FANCC
BP00276:General vesicle transport	16	2.69815	0.00479286	SEC24B, RAB3D, HTT, RAB40C, DCTN2, MTMR11, AP2B1, RAB31, ARF3, CD99L2, SORT1, ERC2, COPG, DYNC1H1, MTMR4, EXOC1
BP00272:Phospholipid metabolism	11	1.85497	0.0078976	MTMR11, IMPAD1, PISD-PS2, PLCG1, PI4KA, GNPAT, PCYT1A, ABCA1, PCYT1B, PI4KB, MTMR4
BP00133:Nuclear transport	8	1.34907	0.0105403	NUP214, NPLOC4, NUP62, IPO11, NUP50, KPNA6, IPO9, TNPO2
BP00063:Protein modification	47	7.9258	0.0144076	EXTL3, METAP1, NDST1, NEK2, PLXNA2, CAMK2G, TMX4, MAPKAPK3, PPT1, ACAT2, HADHB, TRIB1, ST3GAL1, PRKAR2B, ACVR1B, PTK2, FBXW7, HIF1AN, ST3GAL4, COL4A3BP, B230120H23RIK, TNKS, PRKACB, MASTL, MYST2, PIK3R4, PTPRJ, SGK1, ST6GAL1, PTPRE, NLK, WNK1, PTPN14, CDC25A, EPHA4, UBE2O, LARGE, UBA1, RIOK3, MAPK14, DYRK1A, ROR1, MAPK9, NEK9, MGAT5, EIF2AK2, ABL2
BP00035:DNA replication	9	1.51771	0.0158433	RFC5, MCM7, LIG1, POLE, TOP3A, TNKS, POLA2, 6030422M02RIK, MCM5
BP00079:Sulfur redox metabolism	4	0.674536	0.0250865	GLRX3, GCLC, TXN1, GCLM
BP00041:General mRNA transcription activities	5	0.84317	0.0284449	PHC3, L3MBTL2, GTF2A1, POLR1B, POLR2A
BP00038:DNA recombination	5	0.84317	0.0308187	XRCC2, LIG1, RAD54L, SRBD1, TTF2
BP00014:Amino acid biosynthesis	5	0.84317	0.0333059	CLPTM1, PYCRL, GLUL, SEPHS2, SEPHS1
BP00129:Endocytosis	14	2.36088	0.0364797	OPA1, RAB3D, ACTA2, RAB40C, CLTC, RAB31, ARRB1, IGF2R, ACTR1A, RABGEF1, SORT1, ACTL6A, SCARA3, EHD3
BP00060:Protein metabolism and modification	101	17.032	0.0420579	PLXNA2, ST3GAL1, PRKAR2B, USP27X, EIF4EBP2, SERPINE2, ST3GAL4, B230120H23RIK, COL4A3BP, EIF1AY, PRKACB, MYST2, RNF145, EIF2B5, PTPRJ, ANAPC2, UBR4, WNK1, UBR2, HUWE1, RIOK3, ROR1, MRPL49, NEK9, MAPK9, CPD, EIF2AK2, MGAT5, RNF135, EXTL3, NEK2, TMX4, MAPKAPK3, PPT1, SKP1A, TIMP2, PSMA7, ACAT2, GCLM, HADHB, PSMB4, FBXW7, PTK2, EIF3B, PSMB6, PSMB3, PSMB2, EIF3L, TNKS, ST6GAL1, ADAM23, PTPN14, WIPI2, …
Molecular Function
Term	Count	%	PValue	Genes
MF00051:Helicase	15	2.52951	9.86218e-05	DHX8, RAD54L, MCM5, TTF2, CHD8, DDX17, DDX47, MCM7, DDX11, SNRNP200, RAD54L2, 6030422M02RIK, DHX32, RTEL1, DHX57
MF00264:Microtubule family cytoskeletal protein	18	3.03541	0.000182404	GABARAPL2, GABARAPL1, KIF24, OPA1, DNALC1, TUBB2C, TTLL4, TTLL7, DCTN2, TBCD, TUBB5, TUBA4A, MAPRE2, APPBP2, TUBA1A, DYNC1H1, TUBA1C, ZW10
MF00243:DNA helicase	9	1.51771	0.000671999	CHD8, MCM7, DDX11, RAD54L2, 6030422M02RIK, RAD54L, TTF2, MCM5, RTEL1
MF00170:Ligase	24	4.04722	0.00149741	ANAPC2, GCLC, LIG1, CBL, TTLL4, ACACA, UBR4, UBR2, HERC2, SKP1A, TTLL7, LARS2, GCLM, MED20, UBE2O, FBXW7, GLUL, HUWE1, UBA1, 9230105E10RIK, MDM2, RNF135, RNF145, MARS
MF00265:Tubulin	5	0.84317	0.00218886	TUBB2C, TUBB5, TUBA4A, TUBA1A, TUBA1C
MF00127:Reductase	12	2.02361	0.00735996	GLRX3, PYCRL, CYB5R4, NDOR1, SQRDL, GSR, PTGR1, SORD, NDUFA9, HMGCR, CBR3, PMPCA
MF00131:Transferase	38	6.40809	0.0100894	ME1, SEPHS2, EXTL3, SEPHS1, NDST1, POLR2L, NEK2, UPP1, ACAT2, HADHB, POLR2A, ST3GAL1, TYMS, LPCAT1, ST3GAL4, CHST11, B3GNT1, GNPAT, TNKS, PCYT1A, PCYT1B, PTDSS1, MYST2, PIK3R4, MLL1, DLST, ST6GAL1, GSTA4, POLE, METTL6, SUV39H1, POLR3A, POLR1B, RFC5, DGAT1, LARGE, NEK9, MGAT5
MF00108:Protein kinase	25	4.21585	0.0174881	PLXNA2, NEK2, CAMK2G, PASK, MAPKAPK3, TRIB1, ACVR1B, PTK2, B230120H23RIK, COL4A3BP, MASTL, PRKACB, PIK3R4, SGK1, NLK, WNK1, EPHA4, RIOK3, MAPK14, DYRK1A, ROR1, MAPK9, NEK9, EIF2AK2, ABL2
MF00107:Kinase	30	5.05902	0.0185421	NEK2, PLXNA2, CAMK2G, PASK, MAPKAPK3, TRRAP, TRIB1, ACVR1B, PTK2, B230120H23RIK, COL4A3BP, MASTL, GK5, PRKACB, PIK3R4, SGK1, NLK, PI4KA, WNK1, PI4KB, EPHA4, RIOK3, MAPK14, DYRK1A, ROR1, MAPK9, NEK9, GYK, EIF2AK2, ABL2
MF00091:Cytoskeletal protein	32	5.39629	0.0193312	MYL6, KIF24, TUBB2C, TTLL4, TTLL7, DSTN, CTNNB1, ACTR1A, TUBB5, ACTL6A, MSN, APPBP2, TUBA1A, DYNC1H1, TUBA1C, ZW10, GABARAPL2, GABARAPL1, OPA1, ACTA2, DNALC1, STXBP4, FLNA, DCTN2, STOM, TBCD, TUBA4A, MAPRE2, WDR1, EMP3, DIAP1, PARVA
MF00132:Nucleotidyltransferase	8	1.34907	0.0252561	RFC5, POLR2L, TNKS, POLR3A, PCYT1A, POLR1B, PCYT1B, POLR2A
MF00123:Oxidoreductase	28	4.72175	0.0288994	GLRX3, ME1, PYCRL, ACOX1, CYB5R4, SORD, POLR2L, HMGCR, PTGS1, EGLN3, TXN1, OGDH, PRDX1, SESN1, GSR, HIF1AN, COX6B1, SRD5A1, SQRDL, PTGR1, NDUFA9, CBR3, CDO1, COQ6, SDHA, NDOR1, PRDX6, PMPCA
MF00043:DNA-directed DNA polymerase	4	0.674536	0.0298095	RFC5, POLH, POLE, POLA2
MF00082:Transporter	28	4.72175	0.0330886	SLC2A10, ABCF3, ATP6AP1, ATP10D, SFXN2, ABCA1, SLC19A2, SFXN5, SLCO2A1, TAP1, SLC39A9, NUP50, ABCB10, SLC39A6, TCIRG1, SLC12A7, LAPTM4A, IPO11, IPO9, SLC7A11, ATP6V1A, NUP62, SLC35E3, SLC6A6, SLC35E1, SLC5A6, ABCC1, SCARA3
MF00015:Other receptor	13	2.19224	0.0402917	PTPRJ, TNFRSF23, M6PR, NPC1, LGALS3BP, CD320, IGF2R, SORT1, LRP8, SCARA3, UNC13C, GTF3C2, CD14
MF00084:ATP-binding cassette (ABC) transporter	5	0.84317	0.0442767	ABCF3, TAP1, ABCB10, ABCC1, ABCA1
Pathway
Term	Count	%	PValue	Genes
P00060:Ubiquitin proteasome pathway	9	1.51771	0.0251326	HUWE1, PSMC4, PSMD11, UBA1, PSMC2, PSMD2, MDM2, PSMD4, PSMD8
P00059:p53 pathway	10	1.68634	0.0405255	CDKN1A, E2F3, SIN3A, TNFRSF10B, MDM2, TRRAP, TOX4, YWHAE, GTSE1, CDC25A

## Sheet: Heatmap_GO_down
Biological Process
Term	Count	%	PValue	Genes
BP00031:Nucleoside, nucleotide and nucleic acid metabolism	197	19.9595	2.68926e-10	HMGN3, DYNC1LI2, RASL2-9, RNASEH1, CITED2, ISG20, DCPS, SFRS7, RBM8A, BC031441, MED27, PQBP1, H2AFZ, ZRSR2, PTBP2, FAM164A, TWIST2, TWIST1, POLI, RPP21, RAN, EMX2, POLB, SPIRE1, MED10, NME6, DCLRE1A, CCDC130, FOXG1, ADSL, WDR60, ZCRB1, PUS7, PLAGL1, LEO1, NKX2-1, SNRNP35, TCF4, LHX9, KLF6, NRBF2, PAIP2, RTCD1, DDX5, NOP14, 2700007P21RIK, METTL14, DCP1B, ETS2, H3F3A, KLF2, PARP2, KLF4, HLF, GAR1, …
BP00047:Pre-mRNA processing	28	2.83688	3.88972e-05	CPEB4, CWC15, SNRPD1, ZCRB1, SF3B4, FUBP1, SFRS7, HNRNPK, RBM8A, NUDT21, SNRNP35, ZRSR2, PTBP2, BCAS2, SNRPA1, PAIP2, NUDT6, RTCD1, HNRNPA2B1, HNRNPR, SMN1, SLTM, TRNAU1AP, CCDC130, RBMXRT, RBM39, SNRPF, RBM17
BP00048:mRNA splicing	21	2.12766	0.000329981	BCAS2, SNRPA1, RTCD1, HNRNPA2B1, CWC15, SNRPD1, HNRNPR, SF3B4, SLTM, FUBP1, SFRS7, TRNAU1AP, CCDC130, NUDT21, RBMXRT, SNRNP35, ZRSR2, PTBP2, RBM39, SNRPF, RBM17
BP00054:tRNA metabolism	9	0.911854	0.000387714	XPOT, TARS, TRMU, EXOSC6, RPP21, LARP7, DUS4L, TRUB1, PUS7
BP00061:Protein biosynthesis	38	3.85005	0.0012277	GM9104, GAL3ST4, GM10070, RPL19, RPL13, GAR1, METAPL1, EIF5B, GM15427, SRP19, PDCD4, MRPS31, MRPL20, RPS26, EIF3A, EIF3G, RPL6, RPL34, MRPL18, RPL11, RPL10A, EIF3J, RPS20, RPS21, MRPL32, GTPBP8, PIGW, MRPS5, MTRF1L, RPL29, NOP14, 2310009B15RIK, PA2G4, MRPS9, RPL13A, RPS17, TSFM, RPL21, RPS12
BP00062:Protein folding	16	1.62107	0.00154724	C80913, FKBP3, PIN4, FKBP1B, HSP90B1, PFDN1, PPIG, DNAJB9, HSPB6, DNAJB11, PPIL4, FKBP11, DNAJA3, DNAJC1, FKBP2, SERP1
BP00125:Intracellular protein traffic	57	5.77508	0.00239263	CLTA, DYNC1LI2, SEC31A, CHMP4B, RASL2-9, TIMM17B, LPHN2, HOOK2, DYNLL1, RAB28, SEH1L, TRAPPC6B, GBAS, PXMP3, GOPC, TIMM9, SNAP47, STAM, GNL2, WDR34, RPGR, RAN, BASP1, ARL3, SEC61B, RAB18, VPS26A, CHMP2A, RAB3C, NAPG, SNX14, TIMM10, WDR60, BET1, RER1, EEA1, NAPB, HNRNPK, TMED2, STX18, PPIL4, EXOC6, APBA1, FN1, CSNK1A1, WDFY1, KIF3A, TMED9, ATG3, NFKBIL1, COG3, AP2A2, PPIG, MCFD2, STXBP3A, VPS28, T…
BP00034:DNA metabolism	24	2.43161	0.00250843	HINT3, CSNK1A1, HMGN3, POLI, DTYMK, APTX, POLB, TOP1MT, TSPYL4, RAD52, N6AMT1, MNAT1, TOP1, XPA, 2700007P21RIK, DCLRE1A, TSPYL2, ERCC6, THAP1, THAP2, OGG1, PARP2, GADD45A, TERF1
BP00077:Oxidative phosphorylation	10	1.01317	0.00326991	NDUFB4, ADCK2, NDUFA8, NDUFA6, NDUFC2, COX6A1, NDUFC1, COX17, COX5B, NDUFA1
BP00069:Protein disulfide-isomerase reaction	5	0.506586	0.0048942	ERP44, TXNDC11, PDIA3, PDIA5, QSOX2
BP00053:RNA localization	7	0.70922	0.00635753	DYNC1LI2, SEH1L, RAN, CPEB4, RASL2-9, WDR60, SPIRE1, WDR34
BP00072:Protein complex assembly	8	0.810537	0.0130961	MNAT1, WASF3, PXMP3, FDX1L, COX18, SRP19, SURF1, WIPI1
BP00036:DNA repair	13	1.31712	0.0194522	CSNK1A1, HINT3, POLI, APTX, POLB, RAD52, XPA, MNAT1, DCLRE1A, ERCC6, OGG1, PARP2, GADD45A
BP00040:mRNA transcription	95	9.62513	0.0208718	BMI1, HLF, JDP2, HMGN3, RSF1, A630033E08RIK, LMO4, MORF4L2, MITF, CNOT3, CBX4, PRRX1, JAG1, CITED2, MAX, TOP1, WBP5, MDFIC, GATA3, ZFP647, BC031441, MED27, GTF2A2, ZFP238, PQBP1, LRRFIP2, FAM164A, MYC, TWIST2, TWIST1, SSBP2, BRF2, ARID5B, SOX12, SNAPC3, EMX2, FOXN2, TLE1, TOP1MT, CSDA, MBD2, MED10, MURC, TAF13, HOXD8, ZFP518, FOXG1, ZFP263, ZFPM2, IRX3, IRX5, ZBTB10, IRX2, IRX1, WTIP, PLAGL1, HOX…
BP00055:rRNA metabolism	8	0.810537	0.0229298	NOP14, DIMT1, MURC, EXOSC6, GAR1, NPM3, NOP58, NCL
BP00060:Protein metabolism and modification	145	14.691	0.0241308	RPL19, PPP2R5A, RPL13, EIF5B, SRP19, MRPS31, DNAJB11, ATG5, PACSIN2, RPL11, RNF149, MRPL32, DNAJC1, TNIK, GTPBP8, UBE2J1, CDKL3, PA2G4, SEC61B, HSPB6, RPS17, PCMTD2, CLPP, RPS12, BMP2K, FDX1L, RPS13, AMN1, FBXL7, ADAMTS1, TNFAIP3, SURF1, UBA52, ADAMTS5, NEK6, TRIM39, NRBP2, FGFR2, TPST2, GAL3ST4, METAPL1, DUSP12, PIN4, SERPINH1, RPS26, 2810408M09RIK, EIF3A, UBE2D3, HNRNPK, EIF3G, RPL6, PPIL4, FBX…
BP00044:mRNA transcription regulation	74	7.49747	0.0259269	BMI1, JDP2, RSF1, MORF4L2, MITF, CNOT3, PRRX1, CBX4, JAG1, CITED2, MAX, MDFIC, GATA3, ZFP647, MED27, BC031441, ZFP238, PQBP1, MYC, TWIST2, TWIST1, SSBP2, BRF2, SOX12, EMX2, FOXN2, TLE1, CSDA, TAF13, HOXD8, ZFP518, FOXG1, ZFP263, ZFPM2, IRX3, IRX5, IRX2, IRX1, WTIP, PLAGL1, HOXA1, CIR1, MEIS2, NPAS3, JUND, PER2, NKX2-1, SKIL, TCF4, LHX9, KLF6, CEBPB, NRBF2, CEBPG, NR4A2, PHF10, WWTR1, SNAI2, FOXP1…
BP00203:Cell cycle	50	5.06586	0.0271277	HMGN3, DYNC1LI2, RSF1, RASL2-9, TOP1, NUDCD2, MYC, WDR34, CYR61, ESCO1, CCNI, RAN, CCNH, CDK8, FOXN2, SPIRE1, TOP1MT, CDKL3, ZFR, UBE2B, PFDN1, PAPD4, FOXG1, SRGAP3, GADD45A, FKBP3, CETN4, WDR60, TSPYL4, PIN4, SYCP1, SUMO2, TSPYL2, JUND, PPP3CC, FBXO4, SKIL, TERF1, CSNK1A1, PARD6A, CEP135, PHF10, GAS2, TUBGCP2, FOXP1, GPS2, MNAT1, RPS6KA6, FYN, YWHAQ, TRIP6
BP00075:Other protein metabolism	6	0.607903	0.0286442	ATG5, MEX3D, RNF113A2, FBXO4, TNFAIP3, ACAA1A
BP00081:Coenzyme and prosthetic group metabolism	13	1.31712	0.0295342	RBP1, VKORC1L1, QDPR, RSAD1, DLAT, DCI, AUH, COQ3, COQ2, ADCK2, CPOX, VKORC1, FDX1L
BP00281:Oncogenesis	27	2.73556	0.0313498	FGFR2, JDP2, LMO4, CITED2, MEIS2, OAZ1, BCL2, JUND, INTS6, ARMCX3, SKIL, MYC, CYR61, BC032203, TMEFF1, NDNL2, MAGED2, USP6NL, VEGFB, ST7L, IRF5, TAF15, FYN, RRAS2, ETS2, VEGFA, IRF2
BP00076:Electron transport	20	2.02634	0.0346568	NDUFB4, CYB5R1, NDUFA8, NDUFA6, NDUFC2, CYP4V3, NDUFC1, NDUFA1, COX5B, NDUFB2, MTRR, ADCK2, TXNDC17, NARF, COX6A1, FDX1L, QSOX2, COX18, COX17, RFESD
BP00179:Apoptosis	30	3.03951	0.043672	SGPP1, CBX4, PAWR, TSPYL4, GDNF, PDCD4, SUMO2, TSPYL2, HNRNPK, OAZ1, PPAPDC2, BCL2, MYC, EBAG9, CFLAR, CEBPB, TM2D1, LGALS3, NDNL2, MTAP2, TM2D2, MAGED2, ZFR, PDCL3, TMEM47, 1110067D22RIK, IFT57, SRGAP3, PDCD5, GADD45A
BP00136:Other intracellular protein traffic	7	0.70922	0.0438621	HOOK2, KIF3A, MCFD2, RER1, STAM, VPS26A, ATG3
Molecular Function
Term	Count	%	PValue	Genes
MF00042:Nucleic acid binding	181	18.3384	4.49661e-12	SRP14, JDP2, HMGN3, RPL19, SURF6, RPL13, MORF4L2, CBX4, SNRPD1, EIF5B, RNASEH1, SRP19, MRPS31, ISG20, TOP1, SFRS7, RBM8A, INTS6, TIGD2, H2AFZ, RPL11, PTBP2, ZRSR2, MRPL32, BPNT1, TWIST2, TWIST1, SNRPA1, POLI, RPP21, EMX2, HNRNPA2B1, FOXN2, POLB, CSDA, HNRNPR, SLTM, PA2G4, CCDC130, HOXD8, SEC61B, SMARCE1, RPS17, SERBP1, FOXG1, ZFP263, RPS12, RPS13, TNFAIP3, SNRPF, UBA52, ARFGAP3, PNPT1, ZCRB1, OBF…
MF00169:Other isomerase	12	1.21581	4.73278e-05	ERP44, TXNDC11, PPIG, PDIA3, FKBP3, PPIL4, PDIA5, TRUB1, PIN4, FKBP11, FKBP1B, FKBP2
MF00166:Isomerase	18	1.82371	0.000117892	PDIA3, GMDS, AMACR, FKBP3, PDIA5, PIN4, FKBP1B, DCI, AUH, ERP44, TXNDC11, PPIG, PPIL4, RPIA, TRUB1, APIP, FKBP11, FKBP2
MF00065:mRNA processing factor	17	1.72239	0.000122096	BCAS2, SNRPA1, CPEB4, SNRPD1, SF3B4, HNRNPR, SMN1, SFRS7, CCDC130, TAF15, HTATSF1, NUDT21, SNRNP35, PTBP2, RBM39, SNRPF, RBM17
MF00068:mRNA splicing factor	14	1.41844	0.000174171	BCAS2, SNRPA1, SNRPD1, SF3B4, SFRS7, CCDC130, TAF15, HTATSF1, NUDT21, PTBP2, RBM39, SNRNP35, SNRPF, RBM17
MF00053:Other RNA-binding protein	21	2.12766	0.000608088	XPOT, SRP14, RTCD1, RBM45, G3BP1, RNASEH1, ZCRB1, NCL, ZFR, SMN1, FUBP1, LSM14A, SLTM, NOP14, PHAX, RBM8A, SERBP1, NARS2, CPSF6, MEX3D, LRRFIP2
MF00036:Transcription factor	111	11.2462	0.000701454	JDP2, LMO4, MORF4L2, CNOT3, CBX4, JAG1, CITED2, MDFIC, GATA3, MED27, BC031441, GM4769, ZFP688, PQBP1, FAM164A, TWIST2, TWIST1, EMX2, FOXN2, CSDA, MED10, PA2G4, HOXD8, ZFP518, PRDM5, FOXG1, ZFP263, PLAGL1, HOXA1, TRIM66, 2610008E11RIK, MEIS2, 6330416L07RIK, JUND, ZFP760, NKX2-1, SKIL, TCF4, LHX9, KLF6, NRBF2, NR4A2, FOXP1, ATF4, METTL14, DCP1B, ETS2, HIVEP2, KLF2, KLF4, BMI1, GTF3A, HLF, RSF1, A63…
MF00069:Ribonucleoprotein	12	1.21581	0.000956223	TRNAU1AP, HNRNPK, MRPS9, LARP7, HNRNPA2B1, SNRPD1, MSI2, NOP58, RBMXRT, PTBP2, ZRSR2, SRP19
MF00075:Ribosomal protein	29	2.9382	0.0039235	GM9104, GM10070, RPL19, RPL13, GAR1, GM15427, MRPS31, MRPL20, RPS26, RPL6, RPL34, MRPL18, RPL11, RPS20, RPL10A, RPS21, MRPL32, MRPS5, HNRNPR, RPL29, NOP14, 2310009B15RIK, MRPS9, RPL13A, RPS17, RPL21, RPS12, RPS13, UBA52, SERP1
MF00097:G-protein	22	2.22898	0.00533577	RHOJ, AGBL3, RAB3C, ATL1, RAN, MRAS, GTPBP8, RASL2-9, GEM, RRAGC, ARL3, GNG8, RASL11B, RND1, RASL11A, RAB18, RAB28, GNG10, RRAS2, RHEB, GNAS, GNL2, GNG5
MF00093:Select regulatory molecule	67	6.78825	0.00626577	RHOJ, DYNC1LI2, ATL1, RASL2-9, FST, ARHGAP17, GNG8, 2610021K21RIK, SMAP1, ARHGAP5, PCBP3, RAB28, PQBP1, ANP32A, FBXL12, STAM, GNL2, GNG5, PPP1R14B, RPGR, CCNI, ANP32B, RAN, CCNH, GTPBP8, GEM, ARHGEF9, FARP1, ARL3, RND1, RAB18, RRAS2, SRGAP3, GNAS, FBXL22, ARFGAP3, RAB3C, SNX14, MRAS, AKAP9, SERPINH1, RRAGC, PPP1R3D, OAZ1, PPP1R12A, FBXO8, CFLAR, AGBL3, PHACTR2, CEP135, CNKSR3, RGS19, WWTR1, NFKBI…
MF00077:Chaperone	15	1.51976	0.00917577	FKBP3, TSPYL4, HSP90B1, DNAJB9, ADCK2, TSPYL2, DNAJB11, HSPB6, DNAJC24, DNAJC8, YWHAQ, NPM3, DNAJA3, DNAJC1, SERP1
MF00275:Transcription cofactor	15	1.51976	0.0106999	CTBP2, NRBF2, LMO4, ARID5B, TLE1, WTIP, WWTR1, CITED2, TRIM66, CIR1, DCP1B, MED27, PER2, PQBP1, LRRFIP2
MF00079:Other chaperones	10	1.01317	0.0110293	DNAJB9, HSPB6, DNAJB11, DNAJC24, FKBP3, YWHAQ, NPM3, DNAJC1, DNAJA3, SERP1
MF00039:Other transcription factor	25	2.53293	0.0165804	HLF, JDP2, MORF4L2, CNOT3, SPRY1, JUND, SKIL, NFIL3, C80913, CEBPB, CEBPG, FOXN2, CSDA, FOXP1, MURC, PFDN1, PA2G4, SRFBP1, IRF5, TAF15, ETS2, DR1, FOXG1, IRF2, ID3
MF00267:Membrane traffic protein	23	2.33029	0.0227298	CLTA, WDFY1, SEC31A, NAPG, BET1, EEA1, NAPB, SRP19, TMED9, HOOK2, ATG5, TMED2, STX18, PACSIN2, SEH1L, PXMP3, GBAS, SNAP47, EXOC6, STXBP3A, VPS26A, CLINT1, APBA1
MF00099:Small GTPase	15	1.51976	0.0433762	RHOJ, RAB3C, RAN, MRAS, GTPBP8, RASL2-9, GEM, RRAGC, ARL3, RASL11B, RND1, RASL11A, RAB18, RAB28, RRAS2, RHEB
Pathway
Term	Count	%	PValue	Genes
P00052:TGF-beta signaling pathway	15	1.51976	0.00546696	MRAS, FOXN2, GDNF, FKBP1B, FOXP1, CITED2, DCP1B, RAB28, RRAS2, JUND, FOXG1, RHEB, SKIL, FKBP2, ACVR1
P04377:Beta1 adrenergic receptor signaling pathway	7	0.70922	0.0154371	GNG8, GNG10, CACNB2, SNAP47, GNAS, CACNA1C, GNG5
P04378:Beta2 adrenergic receptor signaling pathway	7	0.70922	0.0154371	GNG8, GNG10, CACNB2, SNAP47, GNAS, CACNA1C, GNG5
P04379:Beta3 adrenergic receptor signaling pathway	5	0.506586	0.0442717	GNG8, GNG10, SNAP47, GNAS, GNG5
