# Supplementary material for: Distinct transcriptional responses elicited by unfolded nuclear or cytoplasmic protein in mammalian cells
Source: eLife. 2015 Aug 28;4:e07687. doi: 10.7554/eLife.07687 (PMC4566031; doi:10.7554/eLife.07687)
Supplement: Supplementary file 4. — Gene ontology analysis for genes responding to unfolded destabilizing domain (DD) stress in different timepoints. DOI: http://dx.doi.org/10.7554/eLife.07687.020 [file elife07687s004.xlsx]

## Sheet: Summary
Gene Ontology analysis for genes responding to unfolded DD stress in different time points
Tab name
DD135min_up = Gene Ontology analysis for a list of genes significantly induced (FDR < 0.05) after exposing to unfolded DD stress for 135 min.
DD135min_down = Gene Ontology analysis for a list of genes significantly repressed (FDR < 0.05) after exposing to unfolded DD stress for 135 min.
DD405min_up = Gene Ontology analysis for a list of genes significantly induced (FDR < 0.05) after exposing to unfolded DD stress for 405 min.
DD405min_down = Gene Ontology analysis for a list of genes significantly repressed (FDR < 0.05) after exposing to unfolded DD stress for 405 min.
Column name for Gene Ontology analysis
Term : Gene Ontology term
Count : number of genes matched with the Term.
% : the number of genes in the list compared to the number of total genes included in the Term
PValue : pvalue for the term
Genes : name of genes matched to the Gene Ontology term.

## Sheet: DD135min_up
Biological Process
Term	Count	%	PValue	Genes
BP00062:Protein folding	5	8.19672	0.000745316	HSPH1, BAG3, HSPA1B, DNAJB1, HSPA8
BP00178:Stress response	5	8.19672	0.00214306	IER3, HSPA1B, GADD45A, GTSE1, HSPA8
BP00179:Apoptosis	6	9.83607	0.0111941	TNFRSF10B, BAG3, MDM2, FAS, MYBL1, GADD45A
BP00263:Inhibition of apoptosis	3	4.91803	0.0473951	BAG3, MDM2, MYBL1
Molecular Function
Term	Count	%	PValue	Genes
MF00209:Hsp 70 family chaperone	3	4.91803	0.00057722	HSPH1, HSPA1B, HSPA8
MF00077:Chaperone	5	8.19672	0.000757091	HSPH1, BAG3, HSPA1B, DNAJB1, HSPA8
Pathway
Term	Count	%	PValue	Genes
P00059:p53 pathway	8	13.1148	1.24421e-06	CDKN1A, TNFRSF10B, ZMAT3, MDM2, FAS, APAF1, GADD45A, GTSE1
P00006:Apoptosis signaling pathway	6	9.83607	0.00110157	TNFRSF10B, BAG3, HSPA1B, FAS, APAF1, HSPA8

## Sheet: DD135min_down
Biological Process
Term	Count	%	PValue	Genes
BP00044:mRNA transcription regulation	25	36.2319	2.54605e-11	CITED2, HOXA3, HOXA4, HOXA5, FOXF2, BHLHE40, SKIL, NR2F2, MYC, NR2F1, EGR1, KLF6, CEBPD, SMAD7, KLF10, SMAD6, NR4A1, SNAI2, PPARGC1A, HES1, ID2, NAB2, FOXG1, ID3, KLF3
BP00040:mRNA transcription	28	40.5797	2.90088e-11	CITED2, HOXA3, OSR1, HOXA4, HOXA5, FOXF2, BCL6, BHLHE40, SKIL, NR2F2, FAM164A, MYC, NR2F1, EGR1, KLF6, CEBPD, SMAD7, KLF10, SMAD6, NR4A1, SNAI2, PPARGC1A, HES1, ID2, NAB2, FOXG1, ID3, KLF3
BP00193:Developmental processes	26	37.6812	2.84077e-08	AMOTL2, FAM46B, CITED2, SPRY2, BDNF, HOXA2, HOXA3, OSR1, HOXA4, HOXA5, FOXF2, BHLHE40, SKIL, SMAD7, SMAD6, NR4A1, PCDH18, HES1, AMIGO2, ID2, NAB2, FOXG1, PDGFRB, ADAMTS1, ID3, KLF3
BP00031:Nucleoside, nucleotide and nucleic acid metabolism	29	42.029	9.24991e-07	CITED2, HOXA3, OSR1, HOXA4, HOXA5, FOXF2, BCL6, BHLHE40, SKIL, NR2F2, FAM164A, MYC, NR2F1, H1F0, EGR1, KLF6, SMAD7, CEBPD, SMAD6, KLF10, NR4A1, SNAI2, PPARGC1A, HES1, ID2, NAB2, FOXG1, ID3, KLF3
BP00245:Segment specification	6	8.69565	2.80506e-05	HOXA2, OSR1, HOXA4, HOXA5, FOXG1, FOXF2
BP00246:Ectoderm development	10	14.4928	0.000718446	HES1, BDNF, HOXA2, HOXA4, HOXA5, FOXG1, FOXF2, NR4A1, ADAMTS1, PCDH18
BP00178:Stress response	6	8.69565	0.000851206	SMAD7, SMAD6, DUSP10, PDGFRB, NR4A1, PTX3
BP00108:Receptor protein tyrosine kinase signaling pathway	6	8.69565	0.000910948	SPRY2, BDNF, CTGF, PDGFRB, FGF10, SOCS5
BP00199:Neurogenesis	9	13.0435	0.00135642	HES1, BDNF, HOXA2, HOXA4, HOXA5, FOXG1, FOXF2, ADAMTS1, PCDH18
BP00274:Cell communication	11	15.942	0.00796813	BDNF, CXCL5, SMAD7, CTGF, SMAD6, FOXG1, FOXF2, ADAMTS1, SOCS5, ADAMTS5, PCDH18
BP00248:Mesoderm development	7	10.1449	0.0146005	SPRY2, FOXG1, FOXF2, ADAMTS1, SKIL, AMOTL2, KLF3
BP00224:Cell proliferation and differentiation	9	13.0435	0.0165466	KLF6, CEBPD, NAB2, FOXG1, FOXF2, PDGFRB, BHLHE40, ERRFI1, PCDH18
BP00281:Oncogenesis	6	8.69565	0.0197857	SMAD7, SMAD6, PDGFRB, SKIL, MYC, CITED2
BP00110:Other receptor mediated signaling pathway	4	5.7971	0.0409079	AMIGO2, CTGF, FOXG1, FOXF2
BP00102:Signal transduction	22	31.8841	0.0414451	SGK1, CXCL5, SMAD7, SMAD6, DUSP10, FGF10, NR4A1, SOCS5, PCDH18, AMIGO2, SPRY2, BDNF, CTGF, FOXG1, FOXF2, RHOB, PDGFRB, ADAMTS1, NR2F2, ERRFI1, ADAMTS5, NR2F1
BP00122:Ligand-mediated signaling	5	7.24638	0.0458628	BDNF, CXCL5, SMAD7, SMAD6, SOCS5
Molecular Function
Term	Count	%	PValue	Genes
MF00036:Transcription factor	31	44.9275	3.40548e-14	CITED2, SPRY2, 2610008E11RIK, HOXA2, HOXA3, OSR1, HOXA4, HOXA5, FOXF2, BCL6, BHLHE40, SKIL, NR2F2, FAM164A, MYC, NR2F1, EGR1, KLF6, SMAD7, CEBPD, SMAD6, KLF10, NR4A1, SNAI2, PPARGC1A, HES1, ID2, NAB2, FOXG1, ID3, KLF3
MF00039:Other transcription factor	9	13.0435	2.93215e-05	SPRY2, ID2, CEBPD, SMAD7, SMAD6, FOXG1, FOXF2, ID3, SKIL
MF00222:Zinc finger transcription factor	9	13.0435	0.00750618	EGR1, KLF6, 2610008E11RIK, OSR1, KLF10, BCL6, SNAI2, FAM164A, KLF3
MF00003:Nuclear hormone receptor	3	4.34783	0.012907	NR4A1, NR2F2, NR2F1
Pathway
Term	Count	%	PValue	Genes
P00052:TGF-beta signaling pathway	6	8.69565	0.00284753	SMAD7, SMAD6, FOXG1, FOXF2, SKIL, CITED2

## Sheet: DD405min_up
Biological Process
Term	Count	%	PValue	Genes
BP00062:Protein folding	19	2.53672	5.66185e-06	HSP90AB1, FKBP4, CALR, SGTB, HSPBP1, ST13, MGST3, HSPH1, ERO1LB, HSPA2, BAG3, HSPB8, H2-KE2, FKBP14, EIF3L, DNAJB2, HSPA13, AHSA1, HSPA8
BP00178:Stress response	22	2.93725	7.95016e-06	MOCOS, HSP90AB1, IER3, PPARD, XRCC3, NFKBIB, PRKAB2, GTSE1, SLC11A2, HYOU1, PTK2, HSF1, HSPA2, HSF2, HSPB8, B230120H23RIK, GPX4, ATF6B, TNKS, AHSA1, GADD45A, HSPA8
BP00060:Protein metabolism and modification	146	19.4927	9.39871e-06	PPP2R5D, MMP9, IDE, FGFRL1, PTPN23, RPLP2, UBQLN1, USP27X, ERO1LB, MAP3K4, AAK1, B230120H23RIK, RPLP0, MLKL, HADH, MYST2, EIF2B4, TYRO3, PLXNB2, PRKAB2, TRIM41, UBR4, UBR3, UBR2, EEF2, ST13, ADAMTS7, HUWE1, KDM2A, MRPS18A, RIOK3, HSPB8, MAPK9, RNF135, MGAT5, EIF2C3, SYVN1, STK10, IFI30, CTSA, CDC34, CALR, PSMA7, GCLM, PSMB5, PSMB4, PTK2, PSMB6, TTBK2, PPP1R16A, PSMB3, SNF8, PSMB2, LMTK2, EIF3L, T…
BP00125:Intracellular protein traffic	55	7.34312	0.000122501	DYNC1LI1, COPA, CLTB, TUBB2A, TUBB2C, AP2B1, ERO1LB, GBF1, DYNLL2, ACTR1A, TICAM1, RABGEF1, TUBG1, DYNC1H1, VPS11, SEC24D, SCAMP2, DCTN4, DCTN2, BCAP31, NPC1, IGF2R, SURF4, TUBA4A, CLIP2, COPG, SNX10, SEC23B, NFKBIB, MTX1, RAB40C, CTSA, NAPA, NAPB, NUP214, RAB43, POM121, SNF8, APBA3, EXOC4, TNPO2, EHD3, EXOC1, NPLOC4, VPS18, KIF18B, KIF3C, VCP, AP2A1, TSC2, TOMM40L, HGS, GGA2, RANBP10, DNM2
BP00071:Proteolysis	57	7.61015	0.000485477	DPP3, MMP9, IDE, UBQLN1, FBXL19, USP19, USP27X, PSMD2, PSMD3, PSMD4, PSMD8, USP14, PSMD9, TRIM41, UBR4, UBR3, UBR2, HERC2, ADAMTS7, PSEN1, HUWE1, KDM2A, UBC, CTSD, USP20, UBB, RNF135, SYVN1, USP3, APH1A, USP5, PML, ABHD4, IFI30, CTSA, PSMA7, PSMB5, PSMB4, PSMB6, PSMB3, PSMB2, PREPL, 9230105E10RIK, RHBDF2, 4933407C03RIK, UBE4A, UBE4B, TRIM26, TRIM62, JHDM1D, PSMD13, PSMC5, SERPINB6A, PSMC4, PSMD11…
BP00273:Chromatin packaging and remodeling	16	2.13618	0.00123718	BRD2, HIST1H1E, HIST1H1C, EZH1, SETD1A, TRRAP, TOX4, HIST1H2AK, HIST3H2A, HIST1H4I, SUPT5H, HIST1H3F, BAZ2A, MLL1, HDAC6, SUPT6H
BP00048:mRNA splicing	17	2.26969	0.00225469	DHX8, TFIP11, CHERP, SF1, HNRNPA1, UHMK1, PRPF19, PLRG1, DHX38, PRPF8, GPX4, RAVER1, DHX16, ZRSR1, RBM14, DHX32, DHX57
BP00001:Carbohydrate metabolism	31	4.13885	0.0151742	ME1, ALDOA, SLC2A10, PPARD, SORD, TALDO1, GNPDA1, PGD, G6PDX, HK1, FOXO3, GPI1, PDHB, SLC35B1, GK5, HADH, PDHX, PTGR1, HYAL2, ACO2, PRKAB2, TKT, BPGM, PFKM, VAT1, PMM1, MAN2A2, GSK3A, PKM2, GAA, GYK
BP00047:Pre-mRNA processing	18	2.4032	0.0191944	DHX8, TFIP11, CHERP, SF1, HNRNPA1, UHMK1, PRPF19, PLRG1, DHX38, PRPF8, GPX4, RAVER1, DHX16, ZRSR1, RBM14, DHX32, CPSF1, DHX57
BP00005:Glycolysis	6	0.801068	0.0256113	ALDOA, PKM2, HK1, BPGM, PFKM, GPI1
BP00007:Pentose-phosphate shunt	3	0.400534	0.0309832	TALDO1, PGD, TKT
BP00036:DNA repair	11	1.46862	0.0340382	MMS19, TRP53, XRCC3, CRY2, DDB1, POLD2, MGMT, SRBD1, GADD45A, XAB2, ERCC2
Molecular Function
Term	Count	%	PValue	Genes
MF00077:Chaperone	19	2.53672	1.56786e-05	HSP90AB1, FKBP4, DNAJB12, SGTB, AIP, ST13, HSPH1, HYOU1, DNAJC18, YWHAG, HSPA2, BAG3, HSPB8, DNAJC11, FKBP14, DNAJB2, HSPA13, AHSA1, HSPA8
MF00264:Microtubule family cytoskeletal protein	22	2.93725	3.30878e-05	DYNC1LI1, GABARAPL2, KIFC1, GABARAPL1, TUBB2A, TTC23, TUBB2C, KIF18B, TTLL7, DCTN4, KIF3C, DCTN2, TTLL3, MTAP7D1, MTAP1A, TUBA4A, CLIP2, TUBG1, CLIP3, DYNC1H1, MAPRE3, DNM2
MF00290:Other enzyme regulator	10	1.33511	0.00104104	HSPBP1, DIXDC1, PSMD13, UBE4A, APH1A, PSAP, UBE4B, PSMD2, PSMD3, AHSA1
MF00209:Hsp 70 family chaperone	5	0.667557	0.0011629	HSPH1, HYOU1, HSPA2, HSPA13, HSPA8
MF00051:Helicase	14	1.86916	0.00256473	DHX8, UPF1, RECQL5, BC006779, HELZ, IGHMBP2, DDX47, DHX38, DHX16, RAD54L2, DDX41, DHX32, ERCC2, DHX57
MF00242:RNA helicase	9	1.2016	0.00347113	DHX8, DDX47, UPF1, DHX38, DHX16, HELZ, DDX41, DHX32, DHX57
MF00125:Peroxidase	6	0.801068	0.00370435	PRDX6, GPX4, PRDX2, CAT, SESN2, PRDX1
MF00123:Oxidoreductase	37	4.93992	0.00437955	ME1, PYCRL, ACOX1, SORD, PTGS2, PGD, G6PDX, IFI30, PRDX2, COX7A2L, SESN2, PRDX1, PDHB, GSR, MTHFR, ERO1LB, HIF1AN, GPX4, HMOX1, SPR, CAT, HADH, QSOX1, SQRDL, PTGR1, CBR3, VAT1, COQ6, ADI1, ACADVL, NDOR1, ALDH7A1, HSDL1, PRDX6, BLVRB, NARFL, ALDH2
MF00107:Kinase	38	5.07343	0.00548037	COASY, STK10, FGFRL1, HK1, TRRAP, D8ERTD82E, PTK2, MAP3K4, TTBK2, SPEG, AAK1, B230120H23RIK, PAK4, LMTK2, MLKL, GK5, PLXND1, IP6K2, TYRO3, LIMK1, MAP2K2, PLXNB2, AK1, TAOK3, MINK1, MAPK11, PFKM, PI4KB, ATMIN, TYK2, PLK3, ULK1, RIOK3, GSK3A, CDAN1, PKM2, MAPK9, GYK, KSR1
MF00079:Other chaperones	9	1.2016	0.0109579	DNAJC18, YWHAG, FKBP4, DNAJC11, HSPB8, FKBP14, DNAJB12, SGTB, AHSA1
MF00267:Membrane traffic protein	21	2.80374	0.0115252	COPA, VPS18, CLTB, AP3S2, NAPA, NAPB, BCAP31, AP2B1, DYSF, TICAM1, TOMM40L, GOLPH3L, APBA3, RABGEF1, EXOC4, HGS, VPS11, COPG, SEC24D, EHD3, SNX10
MF00127:Reductase	13	1.73565	0.0136391	SQRDL, PYCRL, PTGR1, SORD, IFI30, CBR3, VAT1, GSR, NDOR1, MTHFR, HSDL1, BLVRB, SPR
MF00268:Vesicle coat protein	6	0.801068	0.0172117	COPA, CLTB, TICAM1, AP3S2, COPG, SEC24D
MF00109:Carbohydrate kinase	5	0.667557	0.0203911	PKM2, HK1, PFKM, GYK, GK5
MF00126:Dehydrogenase	15	2.00267	0.0218504	ME1, PTGR1, SORD, G6PDX, PGD, CBR3, VAT1, PDHB, ACADVL, ALDH7A1, HSDL1, ALDH2, NARFL, SPR, HADH
MF00063:Histone	6	0.801068	0.0244697	HIST1H1E, HIST1H1C, HIST3H2A, HIST1H2AK, HIST1H4I, HIST1H3F
MF00084:ATP-binding cassette (ABC) transporter	6	0.801068	0.0244697	ABCA7, ABCF3, TAP1, ABCA2, ABCC1, ABCB6
MF00255:Non-motor microtubule binding protein	7	0.934579	0.0306958	GABARAPL2, GABARAPL1, MTAP7D1, MTAP1A, CLIP2, CLIP3, MAPRE3
MF00265:Tubulin	4	0.534045	0.0319782	TUBB2A, TUBB2C, TUBA4A, TUBG1
MF00170:Ligase	23	3.07076	0.032587	GCLC, SYVN1, PML, UBR4, TRIM41, TRIM26, DALRD3, UBR3, UBR2, CDC34, HERC2, TTLL7, LARS2, TRIM62, GCLM, TTLL3, UBE2O, HUWE1, ZMIZ2, 9230105E10RIK, MDM2, NEURL4, RNF135
MF00273:Hydrogen transporter	6	0.801068	0.0334483	TCIRG1, ATP6V0C, ATP6V1A, ATP6V1H, COX7A2L, ATP6V0A2
MF00108:Protein kinase	28	3.73832	0.036803	STK10, FGFRL1, D8ERTD82E, PTK2, MAP3K4, TTBK2, SPEG, AAK1, B230120H23RIK, PAK4, LMTK2, MLKL, PLXND1, TYRO3, MAP2K2, LIMK1, PLXNB2, TAOK3, MINK1, MAPK11, ATMIN, TYK2, PLK3, GSK3A, RIOK3, ULK1, CDAN1, MAPK9, KSR1
MF00217:Other proteases	6	0.801068	0.0413669	PSMB5, PSMB4, PSMB6, PSMB3, PSMB2, PSMA7
MF00093:Select regulatory molecule	52	6.94259	0.0447505	ALS2, DYNC1LI1, GNA11, IQGAP3, RANGAP1, GBF1, TIAM1, PCBP2, RABGEF1, PSMD2, PSMD3, PSMD4, RHOD, PSMD8, EIF2B4, PSMD9, ARHGEF7, PRKAB2, CCNF, TBC1D22A, AU040829, SAPS1, PSD, SGSM3, SEC23B, APH1A, NFKBIB, RAB40C, RAB43, RGS12, PROCR, PPP1R16A, PKD1, EHD3, ARHGDIB, GIT1, DIXDC1, ABR, UBE4A, PSAP, UBE4B, DRG2, HSPBP1, CDKN1A, PSMD13, SERPINB6A, TSC2, MAPK8IP3, RIT1, MAPK8IP1, AHSA1, DNM2
MF00100:G-protein modulator	20	2.67023	0.0480935	GIT1, ALS2, ABR, ARHGEF7, IQGAP3, RANGAP1, TBC1D22A, AU040829, RGS12, PSD, GBF1, TIAM1, SGSM3, TSC2, RABGEF1, PKD1, EIF2B4, SEC23B, EHD3, ARHGDIB
Pathway
Term	Count	%	PValue	Genes
P00060:Ubiquitin proteasome pathway	14	1.86916	0.000123128	PSMB5, PSMD13, PSMC5, PSMC4, HUWE1, PSMD11, PSMC3, PSMC2, PSMD2, PSMD3, MDM2, PSMD4, PSMD8, PSMD9
P00049:Parkinson disease	12	1.60214	0.00589291	PLD2, MAPK11, PSMA7, PSMB4, YWHAG, PSMD13, TTBK2, HSPA2, CDAN1, PSMB3, TOR1B, MAPK9, HSPA8
P00024:Glycolysis	6	0.801068	0.00880558	ALDOA, PKM2, HK1, BPGM, PFKM, GPI1
P00059:p53 pathway	12	1.60214	0.0129593	TRP53, CDKN1A, YWHAG, SIN3B, TNFRSF10B, ZMAT3, PML, MDM2, TRRAP, TOX4, GADD45A, GTSE1
P02762:Pentose phosphate pathway	4	0.534045	0.0254079	TALDO1, PGD, HK1, GPI1
P00054:Toll receptor signaling pathway	8	1.06809	0.0256348	PTGS2, MAP2K2, RELA, NFKBIB, TICAM1, MAPK9, MAPK11, NFKB2
P04393:Ras Pathway	9	1.2016	0.0368927	PLD2, MAP3K4, MAP2K2, GSK3A, TIAM1, PAK4, MAPK9, MAPK11, RHOD

## Sheet: DD405min_down
Biological Process
Term	Count	%	PValue	Genes
BP00031:Nucleoside, nucleotide and nucleic acid metabolism	177	19.9549	7.33159e-07	HMGN3, LSM6, LMO4, DTYMK, RASL2-9, SNRPD1, RNASEH1, CBX3, PTTG1, ISG20, CITED2, PRIM1, TOP1, EBNA1BP2, SFRS7, DDX18, MIER1, PDE4B, BC031441, FOXF2, PSIP1, H2AFZ, DDX21, PTBP2, RARB, LSM1, FAM164A, TWIST2, TWIST1, GNL3, SNRPA1, EMX2, HNRNPA2B1, ZHX1, FOXN2, TOPBP1, SPIRE1, ISG20L2, HNRNPR, HES1, SUZ12, DCLRE1A, HOXD8, HIF1A, TRMT11, ZFP280C, ZFP518, FOXG1, CSNK1G3, SNRPE, ZFP825, DSCC1, SNRPG, 311…
BP00203:Cell cycle	62	6.98985	3.18488e-05	HMGN3, FGF7, RASL2-9, PTTG1, PRIM1, TOP1, NUDCD2, MAK16, DKC1, FOXF2, TOP2B, MYC, TUBA1B, AKT3, CDCA4, STAG2, EGFR, ESCO1, CCNI, CCNH, CDK8, FOXN2, TOPBP1, SPIRE1, HMGA2, CDKL3, UBE2B, ZFR, PFDN1, PAPD4, FOXG1, FOXC2, CSNK1G3, SEPT7, EMP1, DSCC1, 3110039M20RIK, FKBP3, CETN3, TSPYL4, SUMO2, SET, ORC6L, PPP3CC, FBXO4, SKIL, TERF1, CSNK1A1, PDS5B, PDS5A, NUCKS1, GAS2, HGF, TUBGCP2, SEPT10, FOXP1, SM…
BP00034:DNA metabolism	27	3.04397	0.000125901	NBN, HMGN3, DTYMK, PTTG1, TSPYL4, PRIM1, TOP1, SET, ORC6L, THAP2, TOP2B, TERF1, CSNK1A1, BRCA2, SMC6, TOPBP1, TSN, RAD50, SMC4, 2700007P21RIK, MNAT1, DCLRE1A, PCNA, CSNK1G3, RBPJ, PARP2, DSCC1
BP00193:Developmental processes	115	12.9651	0.000889221	ASPN, VPS54, LMO4, DLK2, POSTN, AMOTL2, CITED2, OGN, BDNF, FOXF2, TIGD2, RARB, IFRD1, DDAH1, TWIST2, TWIST1, 1700029F09RIK, ZHX1, EMX2, FOXN2, MGP, BASP1, PKIA, FARP1, TIMM8B, NCAM1, HES1, HOXD8, HIF1A, TIMM8A1, FOXG1, RNF138, PDGFRB, EFNA5, ADAMTS1, CSNK1G3, EMP1, WNT5A, 3110039M20RIK, MTX2, VDR, MEIS2, HOXA5, SKIL, LFNG, LHX9, SMAD9, SMAD6, EFEMP1, NR4A2, NR4A1, FOXP1, PCDH18, ZFHX4, RNF2, HIVE…
BP00248:Mesoderm development	38	4.2841	0.00123921	3110039M20RIK, ASPN, NRP1, FHL1, FHL2, DLK2, POSTN, DCN, AMOTL2, TPM1, TPM4, SDC2, OGN, VDR, SPRY1, FOXF2, ANGPT1, SEMA3A, SKIL, COL11A1, APLN, DDAH1, CEBPG, ZHX1, EFEMP1, MGP, FOXN2, MBNL2, MBNL1, PKIA, FOXP1, FARP1, RPS6KA6, FYN, FOXG1, FOXC2, ADAMTS1, KLF4, SGCB
BP00048:mRNA splicing	18	2.02931	0.00361941	SNRPA1, LSM6, RTCD1, HNRNPA2B1, SNRPB2, SNRPD1, GRSF1, HNRNPR, HNRPLL, HNRNPA0, SFRS7, TRNAU1AP, RBMXRT, PTBP2, RBM39, LSM1, SNRPE, SNRPG
BP00055:rRNA metabolism	9	1.01466	0.00589846	DIMT1, MURC, EXOSC6, DKC1, SDPR, MPHOSPH10, NPM3, NOP58, NCL
BP00246:Ectoderm development	41	4.62232	0.00833307	3110039M20RIK, FGF7, NRP1, IRX2, LMO4, VIM, PRRX1, BDNF, HOXA5, FOXF2, TIGD2, MSI2, SEMA3A, LHX9, IFRD1, EGR2, EMX2, RBM45, NR4A2, FOXN2, NR4A1, BASP1, RCAN2, TIMM8B, FOXP1, PCDH18, HES1, NCAM1, RPS6KA6, ZFHX4, HOXD8, HIF1A, TIMM8A1, FYN, FOXG1, BNC1, FABP4, FOXC2, EFNA5, ADAMTS1, EMP1, CDH11
BP00282:Mitosis	23	2.59301	0.0122121	CSNK1A1, ESCO1, PDS5B, CCNI, PDS5A, NUCKS1, CDK8, HGF, PTTG1, CDKL3, HMGA2, UBE2B, SEPT10, SMC4, SUMO2, NUDCD2, PAPD4, DKC1, PPP3CC, CSNK1G3, TUBA1B, SEPT7, STAG2
BP00035:DNA replication	11	1.24014	0.0157066	PRIM1, TOP1, HMGN3, SET, ORC6L, PCNA, TOPBP1, TSPYL4, TOP2B, DSCC1, TERF1
BP00206:Chromosome segregation	10	1.1274	0.0168498	CSNK1A1, ESCO1, SUMO2, DKC1, PTTG1, CSNK1G3, HMGA2, TUBA1B, STAG2, SMC4
BP00047:Pre-mRNA processing	20	2.25479	0.0171996	SNRPA1, PAIP2, LSM6, RTCD1, HNRNPA2B1, SNRPB2, SNRPD1, GRSF1, HNRNPR, HNRNPA0, HNRPLL, SFRS7, TRNAU1AP, HNRNPK, RBMXRT, PTBP2, RBM39, LSM1, SNRPE, SNRPG
BP00281:Oncogenesis	27	3.04397	0.0217442	FGF7, LMO4, PTTG1, CITED2, MEIS2, KRAS, OAZ1, BCL2, FERT2, RARB, SKIL, LOX, LOXL2, MYC, CCAR1, EGFR, TMEFF1, SMAD9, SMAD6, BRCA2, HGF, OGFRL1, EREG, FYN, RRAS2, PDGFRB, EMP1
BP00041:General mRNA transcription activities	6	0.676437	0.0229158	POLR3G, TOP1, POLR2K, SUB1, TOP2B, PHF6
BP00199:Neurogenesis	34	3.83315	0.033854	3110039M20RIK, NRP1, LMO4, IRX2, PRRX1, BDNF, HOXA5, FOXF2, TIGD2, MSI2, SEMA3A, LHX9, IFRD1, EGR2, EMX2, RBM45, FOXN2, BASP1, TIMM8B, FOXP1, PCDH18, HES1, NCAM1, RPS6KA6, ZFHX4, HOXD8, TIMM8A1, HIF1A, FYN, FOXG1, BNC1, FOXC2, EFNA5, ADAMTS1, CDH11
BP00040:mRNA transcription	90	10.1466	0.0385596	BMI1, HMGN3, LMO4, PRRX1, DEK, PTTG1, CITED2, PCGF5, TOP1, WBP5, OSR1, MIER1, SDPR, PCGF6, BC031441, GTF2A2, FOXF2, ZFP238, PSIP1, RARB, NR2F2, GATAD1, TOP2B, FAM164A, MYC, TWIST2, NR2F1, TWIST1, EGR2, TBX15, SSBP2, EMX2, FOXN2, HMGA2, MBD2, SUZ12, HES1, MURC, HOXD8, HIF1A, POGK, ZFP518, ZFP280C, NAB2, FOXG1, NAB1, FOXC2, ZFP825, 3110039M20RIK, ZFP62, POLR2K, IRX2, TAF9B, VDR, HNRNPK, MEIS2, HOXA…
BP00172:Other neuronal activity	11	1.24014	0.039353	OGFRL1, NCAM1, SCHIP1, FKBP3, MSI2, SCG5, BASP1, PRKG2, CALCRL, HOMER1, FEZ2
BP00267:Homeostasis	15	1.69109	0.040103	SGK1, PTPN2, EDN1, FST, PPP3R1, ATP2B1, VDR, ATP2C1, NUCB2, ATP2A1, PPP3CC, SLC4A7, CP, LEPROT, SLC4A4
BP00250:Muscle development	11	1.24014	0.0468404	FHL1, FHL2, MBNL2, ADAMTS1, POSTN, MBNL1, SKIL, PKIA, TPM1, TPM4, SGCB
BP00274:Cell communication	58	6.5389	0.0470404	ASPN, NAMPT, FGF7, GRIK2, EDN1, PNN, NOV, BDNF, SLC1A3, CD93, CTGF, FOXF2, ANGPT1, SEMA3A, RARB, APLN, MAGI3, FOXN2, MGP, PRELP, NCAM1, TNFAIP6, FOXG1, FOXC2, VCAN, ADAMTS1, EFNA5, ADAMTS5, C1D, THOC1, WNT5A, 3110039M20RIK, SIGLECG, CCK, CXCL5, SNX14, LUM, CCL9, DCN, VCAM1, VDR, PER2, SCG5, COL8A1, SMAD9, SMAD6, SNX25, EFEMP1, IGF1, HGF, PCDH19, FOXP1, PCDH18, SFRP2, FABP4, ADAM22, TMTC4, PLAU, C…
BP00265:Oncogene	9	1.01466	0.0478473	FGF7, KRAS, FYN, LMO4, RRAS2, FERT2, PTTG1, SKIL, MYC
Molecular Function
Term	Count	%	PValue	Genes
MF00042:Nucleic acid binding	162	18.2638	2.4964e-08	HMGN3, LSM6, VPS54, SNRPD1, EIF5B, CBX3, RNASEH1, PTTG1, ISG20, PRIM1, SFRS7, TOP1, DDX18, BTBD1, FOXF2, TIGD2, H2AFZ, DDX21, PTBP2, RARB, FAM103A1, LSM1, TWIST2, STAG2, TWIST1, RPL36AL, SNRPA1, RPL35A, DARS, EMX2, HNRNPA2B1, ZHX1, FOXN2, TOPBP1, ISG20L2, HNRNPR, RSL1D1, HES1, SUZ12, PA2G4, HOXD8, SEC61B, HIF1A, TRMT11, SERBP1, WDR89, FOXG1, EIF2S2, RPS13, SNRPE, UBA52, DSCC1, SNRPG, 3110039M20RI…
MF00069:Ribonucleoprotein	12	1.35287	0.00071454	TRNAU1AP, HNRNPK, LARP7, HNRNPA2B1, SNRPD1, MPHOSPH10, MSI2, NOP58, RBMXRT, PTBP2, HNRPLL, HNRNPA0
MF00023:Other signaling molecule	21	2.36753	0.00161632	WNT5A, NRP1, G3BP1, MGP, HOMER1, RCAN2, CD2AP, NOV, 2610021K21RIK, SPRY1, PLCB4, 1110067D22RIK, SFRP2, CTGF, BCL2, SH3KBP1, ANGPT1, MARCKS, THBS1, LFNG, THBS2
MF00068:mRNA splicing factor	11	1.24014	0.0053066	SNRPA1, SFRS7, HTATSF1, LSM6, SNRPB2, SNRPD1, RBM39, PTBP2, LSM1, SNRPE, SNRPG
MF00039:Other transcription factor	26	2.93123	0.00598636	3110039M20RIK, PTTG1, GABPB1, SPRY1, SDPR, FOXF2, SKIL, GABPB2, CDCA4, SMAD9, TBX15, CEBPB, CEBPD, CEBPG, SMAD6, FOXN2, FOXP1, MURC, PA2G4, PFDN1, ID2, FOXG1, FOXC2, ID4, ID3, RBPJ, IFI204
MF00016:Signaling molecule	45	5.07328	0.0116943	WNT5A, SIGLECG, NAMPT, FGF7, CCK, NRP1, CXCL5, EDN1, CCL9, FGF10, CD2AP, NOV, SPRY1, 2610021K21RIK, BDNF, PLCB4, TMED5, CTGF, BCL2, PSIP1, SCG5, ANGPT1, SEMA3A, THBS1, THBS2, APLN, LFNG, GNL3, SPP1, EGFR, TMEFF1, G3BP1, EFEMP1, MGP, IGF1, HGF, HOMER1, RCAN2, EREG, 1110067D22RIK, SFRP2, SH3KBP1, MARCKS, EFNA5, TMPO
MF00110:Nucleotide kinase	7	0.789177	0.0148767	MAGI3, DTYMK, AK3, MPP6, AK5, AK3L1, CMPK1
MF00099:Small GTPase	16	1.80383	0.0165553	GTPBP4, RAB3C, GTPBP8, RASL2-9, SEPT10, RRAGC, RND3, KRAS, RRAS2, RAC1, RAP1A, RAB11A, RAP1B, GUF1, SEPT7, RHOBTB3
MF00065:mRNA processing factor	12	1.35287	0.0176667	SNRPA1, SFRS7, HTATSF1, LSM6, SNRPB2, SNRPD1, RBM39, PTBP2, LSM1, HNRNPR, SNRPE, SNRPG
MF00093:Select regulatory molecule	62	6.98985	0.0190022	COPS3, RASL2-9, FST, 2610021K21RIK, SMAP1, PLCB4, SERPINE1, ANP32A, ANGPT1, TOP2B, DOCK11, PPP1R14B, GNG5, GTPBP4, RPGR, CCNI, ANP32B, CCNH, GTPBP8, ARHGEF9, PKIA, FARP1, RND3, RRAS2, SEPT7, CAV2, CAV1, RAB3C, XIAP, SNX14, ASAP1, CYTH3, TIMP3, RRAGC, PPP1R3D, OAZ1, SET, KRAS, RAC1, RAB11A, GUF1, THBS1, THBS2, RASA1, PIK3R1, RHOBTB3, CFLAR, AGBL3, SESTD1, SNX25, RGS19, SEPT10, MNAT1, RASSF6, GNG10…
MF00057:DNA topoisomerase	3	0.338219	0.0228017	TOP1, BTBD1, TOP2B
MF00097:G-protein	19	2.14205	0.028572	AGBL3, GTPBP4, RAB3C, GTPBP8, RASL2-9, SEPT10, RRAGC, RND3, KRAS, GNG10, RRAS2, RAC1, RAP1A, RAB11A, RAP1B, GUF1, SEPT7, GNG5, RHOBTB3
MF00019:Growth factor	10	1.1274	0.0360829	NOV, EGFR, BDNF, FGF7, EREG, CTGF, PSIP1, IGF1, FGF10, HGF
MF00053:Other RNA-binding protein	15	1.69109	0.0494859	DARS, RARS2, RTCD1, RBM45, G3BP1, RNASEH1, ZFR, NCL, QK, SLBP, ZFP36L2, TROVE2, SERBP1, MEX3D, FAM103A1
Pathway
Term	Count	%	PValue	Genes
P00017:DNA replication	5	0.563698	0.0125974	PRIM1, TOP1, PCNA, RNASEH1, TOP2B
P00021:FGF signaling pathway	13	1.46561	0.0257398	PRKCA, FGF7, PPP2R5A, FGF10, SPRY1, KRAS, RRAS2, RAC1, YWHAQ, AKT3, RASA1, RASA2, PPP2R2A
P00018:EGF receptor signaling pathway	13	1.46561	0.0445271	PRKCA, EGFR, PPP2R5A, SPRY1, KRAS, EREG, RRAS2, RAC1, YWHAQ, PHLDB2, AKT3, RASA1, RASA2
