# Supplementary material for: Distinct transcriptional responses elicited by unfolded nuclear or cytoplasmic protein in mammalian cells
Source: eLife. 2015 Aug 28;4:e07687. doi: 10.7554/eLife.07687 (PMC4566031; doi:10.7554/eLife.07687)
Supplement: Supplementary file 5. — mRNA-seq data from bortezomib perturbations. DOI: http://dx.doi.org/10.7554/eLife.07687.021 [file elife07687s005.xlsx]

## Sheet: Summary
mRNA-seq data from all three perturbations.
Transcript changes are represented as log2 fold-changes relative to unperturbed samples. Genes having at least 1 sequence read in every samples were included.
The original data (including fastq files) are available at Gene Expression Omnibus (GEO) database under accession no. XXXXX
Bor = Bortezomib (2 mM).
gene = annotated genes
45, 135, or 405 = treatment time in minutes
logFC = log2 fold change.
PValue = p-value calculated using edgeR
FDR = false discovery rate calculated using edgeR

## Sheet: mRNA-seq Data
gene	Bor45logFC	Bor45PValue	Bor45FDR	Bor135logFC	Bor135PValue	Bor135FDR	Bor405logFC	Bor405PValue	Bor405FDR
0610030E20Rik	-0.600089	0.425978	0.717228	-0.0493251	0.956887	0.990157	-1.3714	0.0345572	0.139338
0610031J06Rik	0.68252	0.346137	0.673649	0.196636	0.810698	0.945857	1.72326	0.0307636	0.128476
1110002L01Rik	-0.569319	0.369638	0.689167	-0.325167	0.617824	0.869414	-0.699406	0.282971	0.471838
1110037F02Rik	0.781385	0.222003	0.568915	0.708982	0.236599	0.615256	0.58469	0.265361	0.456253
1110059G10Rik	0.594939	0.344903	0.673649	0.0961465	0.902093	0.972699	-0.412193	0.586187	0.727162
1190002N15Rik	0.519414	0.411359	0.714489	-0.422423	0.512194	0.815614	0.197861	0.72347	0.823637
1200011I18Rik	0.534621	0.380638	0.694952	1.03066	0.187224	0.565273	1.07789	0.0333057	0.135928
1200014J11Rik	-0.465231	0.454514	0.738273	-0.310947	0.63506	0.879907	-0.165814	0.767574	0.854865
1500017E21Rik	-0.236546	0.779827	0.903294	0.771062	0.289841	0.659691	-0.356538	0.611601	0.746885
1600012H06Rik	0.431775	0.601979	0.806686	-0.0916192	0.904015	0.97279	-0.401058	0.569782	0.714994
1600014C10Rik	-1.04503	0.285889	0.628391	-1.00347	0.139434	0.492974	-1.31813	0.126723	0.300841
1600029D21Rik	-1.10809	0.220147	0.567422	-0.0720404	0.967124	0.992436	-2.00642	0.0206629	0.0984916
1700001L05Rik	-1.63199	0.104188	0.391881	-0.793144	0.288673	0.659269	-1.18741	0.194888	0.382168
1700017B05Rik	-0.512514	0.528684	0.768105	0.0408297	0.942904	0.984086	-0.140974	0.840448	0.903735
1700021K19Rik	-0.0873962	0.917248	0.967105	0.34593	0.696951	0.907646	-0.167965	0.796154	0.873908
1700022I11Rik	-0.834248	0.396395	0.704701	0.429305	0.568589	0.843306	-2.17991	0.019275	0.0944758
1700025G04Rik	-0.341675	0.614818	0.81244	-0.773431	0.213518	0.587145	-0.672287	0.266688	0.457516
1700030L20Rik	-1.10239	0.351355	0.676325	-1.1414	0.187168	0.565273	-1.24145	0.227823	0.420647
1700052K11Rik	-1.3466	0.0607699	0.295841	-1.09137	0.214724	0.588208	-1.56433	0.0425336	0.158523
1700052N19Rik	1.00237	0.127861	0.435212	0.331546	0.703728	0.911689	0.244277	0.718659	0.820765
1700066M21Rik	0.0737866	0.91363	0.965519	0.64658	0.305548	0.67387	-0.629696	0.345702	0.526465
1700091H14Rik	-0.936039	0.368338	0.688798	-0.41296	0.594165	0.85659	-0.936925	0.330454	0.513517
1700094D03Rik	-0.952466	0.199688	0.539009	0.422614	0.54588	0.831098	-0.0825749	0.930992	0.96221
1700123O20Rik	0.804187	0.258147	0.603714	1.03882	0.137018	0.488907	1.49171	0.0224531	0.103967
1810026B05Rik	0.413856	0.492718	0.751041	1.05776	0.102239	0.424976	0.269408	0.645275	0.771321
1810026J23Rik	-0.0222842	0.971621	0.992361	0.571861	0.339416	0.700757	-0.262684	0.610845	0.746505
1810055G02Rik	0.370431	0.641492	0.828924	0.776086	0.363809	0.7193	1.03308	0.133855	0.308776
2010015L04Rik	-0.864364	0.422142	0.717228	-0.833673	0.309219	0.676765	-1.34289	0.17879	0.365457
2210018M11Rik	-0.135641	0.853231	0.939785	-0.164946	0.860344	0.957123	0.261502	0.703493	0.811375
2310008H09Rik	0.35838	0.572908	0.789924	-0.198949	0.77645	0.936469	0.753301	0.154531	0.33435
2310010M20Rik	-0.490927	0.636433	0.826212	-1.14237	0.0933703	0.410045	-1.09384	0.21932	0.411912
2310015A10Rik	-1.39645	0.111188	0.406649	-1.13294	0.136339	0.488637	-1.46647	0.103499	0.265296
2310035C23Rik	0.400637	0.504393	0.756101	0.439947	0.458322	0.788025	0.0272657	0.96883	0.984706
2310039L15Rik	-1.14524	0.241373	0.590105	-0.860744	0.169639	0.540435	-0.791636	0.351136	0.530214
2310044G17Rik	-0.343673	0.60695	0.80844	0.786338	0.259728	0.636524	-0.780571	0.258564	0.450115
2310067B10Rik	-0.520243	0.491469	0.750727	-0.197536	0.811431	0.945857	-1.09318	0.132955	0.307677
2410002F23Rik	-0.808494	0.291995	0.63396	-0.0195953	0.992142	1	-0.275314	0.625672	0.756305
2410016O06Rik	-0.508915	0.47783	0.744885	-0.966955	0.118002	0.454948	-1.0788	0.0533058	0.181916
2410018L13Rik	-0.922994	0.292608	0.634881	-1.11668	0.0968145	0.416792	-0.935574	0.233692	0.426247
2410089E03Rik	-0.0136891	0.985516	0.996763	0.192802	0.78533	0.940121	0.00907409	0.989577	0.997119
2410127L17Rik	1.56775	0.0197889	0.179472	1.86477	0.0192447	0.203483	1.10225	0.0585813	0.190671
2510009E07Rik	-0.410724	0.53045	0.769336	-0.0524232	0.951983	0.98807	-0.878076	0.186008	0.373803
2610002M06Rik	0.50506	0.48856	0.748788	0.403076	0.66014	0.890416	-1.0606	0.124416	0.298242
2610005L07Rik	-0.711527	0.46306	0.741794	-0.668636	0.400279	0.747029	-0.608132	0.340241	0.520832
2610305D13Rik	0.015073	0.996718	1	0.249641	0.684092	0.903026	-0.162058	0.776596	0.859387
2610507B11Rik	1.13876	0.150324	0.470253	0.336212	0.648615	0.887001	0.966242	0.142377	0.319903
2700054A10Rik	-1.07144	0.307078	0.644697	-0.647205	0.424873	0.763981	-1.39369	0.151404	0.332018
2700081O15Rik	-0.736692	0.206423	0.547266	0.129317	0.841063	0.949958	-0.569759	0.24183	0.434687
2700089E24Rik	1.10947	0.0941647	0.376959	0.605786	0.353812	0.711472	0.125687	0.820836	0.890302
2810006K23Rik	-1.12522	0.144691	0.463603	-0.74481	0.291399	0.661832	-1.51558	0.0432877	0.160618
2810025M15Rik	-0.751997	0.257595	0.603714	-0.0576587	0.962146	0.991203	-0.398693	0.524232	0.679305
2810403A07Rik	0.773055	0.346905	0.673649	0.895051	0.149588	0.506587	0.506026	0.375067	0.554706
2810407C02Rik	1.90486	0.0474546	0.261703	1.42299	0.0629296	0.331056	1.52801	0.0230694	0.105364
2810442I21Rik	-0.737036	0.409131	0.713747	-0.0040588	1	1	-1.76833	0.0704344	0.213574
2810474O19Rik	1.13046	0.161227	0.486781	1.48774	0.0515094	0.307577	1.96695	0.00327285	0.0274504
2900097C17Rik	0.317387	0.670403	0.846045	-0.0799034	0.911221	0.974426	0.16635	0.775165	0.859019
3110052M02Rik	-1.29187	0.0716262	0.323928	-0.822837	0.219695	0.594211	-1.69587	0.0202814	0.0975996
3110057O12Rik	-0.613137	0.476254	0.744885	-0.169754	0.857085	0.955814	-1.37205	0.153902	0.334142
3110062M04Rik	-1.47517	0.0411309	0.243681	-0.621123	0.383454	0.737567	-1.40279	0.0594234	0.192113
3230401D17Rik	0.163885	0.798611	0.912491	0.29755	0.627197	0.875531	1.16981	0.022742	0.10463
4632415L05Rik	-1.45829	0.114289	0.412491	-0.576612	0.493503	0.80551	-1.43387	0.0716499	0.215551
4833420G17Rik	-0.502394	0.459079	0.741373	-1.55945	0.0536909	0.312203	-0.557359	0.3232	0.506711
4833422C13Rik	-1.51076	0.101644	0.388122	-1.71335	0.0696966	0.350156	-1.4332	0.112517	0.281236
4921508A21Rik	-0.818361	0.45581	0.738812	-0.223011	0.779027	0.937421	-1.02469	0.310185	0.493311
4930414L22Rik	-0.229077	0.816634	0.921971	-1.33377	0.0635957	0.333385	-1.84748	0.0398716	0.152447
4930422G04Rik	0.303817	0.648352	0.833916	1.14745	0.109135	0.440348	-0.474159	0.433722	0.605452
4930427A07Rik	-0.55682	0.531604	0.769899	-0.656157	0.49145	0.804511	-0.369543	0.608865	0.745087
4930430F08Rik	0.642518	0.349962	0.675406	0.918647	0.214653	0.588208	-0.265471	0.698573	0.807926
4930431F12Rik	-0.740663	0.510868	0.758228	-0.548593	0.509197	0.815048	-1.14842	0.243536	0.435727
4930470H14Rik	-0.957976	0.41893	0.717228	-0.736932	0.37604	0.73109	-1.18098	0.258735	0.450115
4930507D05Rik	-0.902361	0.347467	0.674006	-0.846481	0.308762	0.676765	-1.5385	0.0841263	0.236118
4930511M06Rik	-1.19391	0.268427	0.611878	-0.449051	0.594233	0.85659	-1.19102	0.247037	0.438642
4930513N10Rik	-0.957642	0.294606	0.636876	-1.21831	0.0457212	0.293292	-1.80263	0.0348495	0.140122
4930519F09Rik	-1.08365	0.293872	0.636384	-0.631085	0.451102	0.783724	-1.07326	0.260815	0.452152
4930519G04Rik	-1.03696	0.36189	0.684025	-1.03519	0.19406	0.573504	-1.64376	0.0981725	0.258572
4930523C07Rik	-0.278527	0.671455	0.846484	-0.152308	0.825063	0.948587	-0.603489	0.342216	0.522899
4930555G01Rik	-1.71906	0.0525315	0.275201	-1.74199	0.0196324	0.204209	-1.32472	0.147018	0.326246
4930579G24Rik	-0.12288	0.847816	0.937476	0.0701111	0.904438	0.97279	-1.05743	0.0857744	0.239539
4931406P16Rik	0.253042	0.653783	0.83702	-0.0486095	0.940954	0.983636	-0.504371	0.346498	0.527106
4932415G12Rik	-1.79245	0.0272698	0.205641	-0.892484	0.20298	0.577449	-1.78578	0.0289128	0.123519
4932438A13Rik	0.00393914	1	1	-0.397489	0.538217	0.828962	0.262522	0.605495	0.742134
4933411K20Rik	-0.586917	0.308375	0.645334	-1.69022	0.043401	0.28804	-1.25746	0.0256636	0.113799
4933421O10Rik	-0.327156	0.751736	0.889636	-0.699283	0.340747	0.700757	-1.16864	0.152886	0.332996
4933426M11Rik	-0.0655471	0.924906	0.971068	0.181836	0.773058	0.93534	0.128943	0.812992	0.885234
4933427D14Rik	-0.129046	0.830471	0.928	-0.443091	0.543896	0.830537	-0.546511	0.331589	0.51413
4933431E20Rik	-1.08262	0.206639	0.547381	-0.393635	0.613721	0.867405	-1.37372	0.0809827	0.230486
4933434E20Rik	0.396463	0.523582	0.765504	0.54985	0.393718	0.743623	0.0123436	0.984171	0.993865
4933438K21Rik	-0.761279	0.492084	0.751041	-0.850702	0.231065	0.60715	-1.01834	0.252105	0.443323
5031410I06Rik	-0.257532	0.809251	0.91815	-0.626148	0.392647	0.743277	-0.833799	0.35133	0.530214
5031425E22Rik	-1.01606	0.227992	0.577335	1.28453	0.108503	0.440211	-0.415383	0.595044	0.735243
5430417L22Rik	-0.328301	0.635993	0.825854	-0.741824	0.288091	0.659269	-2.03315	0.00145516	0.0156212
5530601H04Rik	0.500229	0.478853	0.744978	0.430918	0.550884	0.833624	-0.769861	0.254171	0.444932
5730409E04Rik	-0.374825	0.580725	0.795843	0.230147	0.758615	0.931241	-0.907679	0.188605	0.376166
5730455P16Rik	-0.923151	0.117301	0.417103	0.0668685	0.910186	0.974426	-0.577766	0.287962	0.476208
5730577I03Rik	-1.31735	0.139091	0.454942	-0.626501	0.395464	0.74416	-1.49258	0.106315	0.270306
5830417I10Rik	-0.996563	0.181902	0.518657	-1.72589	0.0344894	0.262566	-1.08439	0.0533315	0.181916
5830418K08Rik	0.783468	0.211578	0.556009	0.380489	0.567745	0.843051	0.838583	0.132917	0.307677
6030458C11Rik	-0.197297	0.769956	0.899059	0.135898	0.826593	0.948805	-0.671538	0.297089	0.483817
6330403A02Rik	-1.82662	0.0706902	0.321401	-0.398114	0.525434	0.822963	-1.42338	0.109108	0.275616
6430548M08Rik	-1.07928	0.204965	0.546257	-1.09816	0.229831	0.605809	-1.72629	0.0237096	0.107701
6820431F20Rik	-0.286033	0.730867	0.875345	0.63529	0.412409	0.757577	0.753588	0.253572	0.444652
8030462N17Rik	-0.526825	0.41341	0.715355	0.74948	0.296554	0.666317	0.386265	0.509352	0.667343
8430419L09Rik	-2.23019	0.0167663	0.167851	-1.60203	0.0457685	0.293292	-2.51794	0.00228045	0.0215357
9030025P20Rik	-0.746605	0.306479	0.64437	-2.1355	0.00951709	0.167832	-0.875896	0.231945	0.425015
9030617O03Rik	-1.15328	0.169306	0.498883	0.317715	0.691555	0.905143	-0.435332	0.542098	0.693708
9030624G23Rik	-0.459904	0.623179	0.818309	-1.15985	0.0801402	0.379476	-1.04288	0.164056	0.346159
9130019O22Rik	-1.11451	0.123233	0.427865	-0.243062	0.741886	0.927173	-1.07008	0.180557	0.368038
9130023H24Rik	-0.513134	0.51458	0.759914	0.490279	0.458715	0.788047	-1.30585	0.0606925	0.194837
9130024F11Rik	-0.176327	0.870186	0.946679	0.0354275	0.949357	0.987489	-1.16628	0.240628	0.433893
9230114K14Rik	0.00732951	0.992144	0.998704	-0.0686654	0.951711	0.98807	-0.331674	0.631179	0.759993
9330151L19Rik	-0.575014	0.492179	0.751041	0.3271	0.637003	0.880898	-0.994429	0.252531	0.443606
9330159F19Rik	-1.10167	0.133599	0.445684	-0.214493	0.772583	0.935224	-1.15587	0.0888639	0.243564
9330159M07Rik	-1.90147	0.028778	0.208303	-1.0259	0.232077	0.608569	-1.46327	0.0623142	0.197518
9430016H08Rik	0.975794	0.189385	0.528866	1.51924	0.0782925	0.375684	0.585973	0.349017	0.529586
9430018G01Rik	-1.72234	0.011409	0.146971	-0.815128	0.345006	0.702599	-1.23755	0.135283	0.310491
9430020K01Rik	-0.415	0.484322	0.747158	-0.155854	0.816713	0.946957	-0.440345	0.384893	0.562986
9530053A07Rik	-0.741817	0.477597	0.744885	-0.446004	0.578216	0.845052	-0.70861	0.449873	0.619731
9530068E07Rik	1.59584	0.0339959	0.224435	0.966269	0.0998341	0.422165	1.40082	0.0188143	0.0930932
9530091C08Rik	-0.933226	0.41185	0.714489	-0.721857	0.394588	0.743623	-1.34259	0.176657	0.362699
9630028B13Rik	-0.930563	0.327792	0.661052	-0.0899169	0.943802	0.984249	-0.58534	0.550789	0.700017
9830001H06Rik	-0.596824	0.492045	0.751041	-0.638529	0.435415	0.771069	-0.801159	0.200467	0.389159
9830147E19Rik	-1.52015	0.0222992	0.189242	-1.08586	0.0818015	0.383237	-0.617538	0.347165	0.527573
9930013L23Rik	-0.316616	0.626631	0.820572	-0.730173	0.287226	0.658379	-0.643194	0.280362	0.469423
9930021J03Rik	0.0579227	0.937657	0.976514	0.221032	0.750723	0.930441	-0.434317	0.416433	0.591173
9930104L06Rik	-1.06414	0.173297	0.506483	-1.13603	0.113413	0.44688	-1.7952	0.0210462	0.0994707
A130010J15Rik	-1.36766	0.0631102	0.303061	-0.880615	0.195616	0.57401	-2.2331	0.0039106	0.0308428
A130077B15Rik	-0.945868	0.41727	0.716937	-0.789116	0.347378	0.704899	-1.14476	0.265908	0.456882
A230046K03Rik	0.375988	0.65948	0.839429	1.12633	0.188063	0.56607	1.47196	0.0542873	0.183111
A230072C01Rik	-0.992143	0.297107	0.640512	-1.03742	0.210213	0.586077	-0.869647	0.353961	0.533341
A330023F24Rik	-1.00735	0.228477	0.578029	-1.04298	0.128316	0.47332	-1.99182	0.00758546	0.050476
A430033K04Rik	-0.114728	0.875104	0.9479	0.116445	0.851229	0.954955	-0.642075	0.337934	0.518564
A430078G23Rik	-0.847494	0.471714	0.744362	-0.771455	0.34776	0.705062	-1.13875	0.277729	0.467284
A430105I19Rik	-0.584463	0.459787	0.741722	-1.01829	0.10979	0.441853	-1.13456	0.0583218	0.190265
A530032D15Rik	-0.788812	0.471762	0.744362	-0.92617	0.354711	0.712785	-1.56191	0.0745168	0.220321
A530054K11Rik	-0.0133652	0.975323	0.993517	0.128039	0.85438	0.955779	-0.40769	0.517443	0.674646
A630072M18Rik	-0.937826	0.280911	0.624745	0.0911418	0.922918	0.977357	-1.29644	0.0928738	0.251264
A630089N07Rik	-1.05404	0.342738	0.673649	-0.656889	0.434888	0.770922	-1.36401	0.156931	0.337043
A730056A06Rik	-1.90326	0.0210195	0.185592	-0.633636	0.505014	0.813723	-2.20925	0.0153473	0.0812709
A730098P11Rik	-0.552575	0.391584	0.70256	-0.375593	0.549953	0.833473	-0.680032	0.31428	0.497271
A830082N09Rik	-0.939386	0.322708	0.657985	-0.338624	0.656029	0.890416	-1.20706	0.138285	0.314933
AA986860	-1.1594	0.187472	0.5265	0.344922	0.658284	0.890416	-1.38668	0.160502	0.341678
AA987161	-0.022168	0.985557	0.996763	-0.130524	0.822929	0.948349	-0.720013	0.213299	0.404827
AI314180	2.1827	0.0135617	0.159192	1.93801	0.013673	0.183035	2.79319	0.000187124	0.00420035
AI464131	-0.969531	0.222523	0.569055	0.56788	0.453707	0.784386	-1.01111	0.29331	0.480309
AI506816	0.00657286	1	1	0.562724	0.465772	0.792216	-0.720885	0.310155	0.493311
AI597468	0.378587	0.520686	0.764651	0.9047	0.123735	0.464348	-0.171992	0.746292	0.840478
AI597479	0.292228	0.652871	0.836527	-0.409861	0.573761	0.845052	-0.729588	0.330064	0.51307
AK010878	0.279435	0.726049	0.872439	0.819173	0.344681	0.702599	0.542492	0.528327	0.682519
AU022252	-1.0494	0.150284	0.470253	-1.39671	0.0879468	0.396515	-1.9002	0.0053292	0.0385236
AU040320	-0.0234264	0.983139	0.996628	0.337351	0.659364	0.890416	-0.427159	0.567517	0.713989
AW209491	0.394245	0.561961	0.782526	0.688312	0.353563	0.711472	0.395737	0.527143	0.68145
AW551984	-0.449219	0.503964	0.756101	-0.996813	0.141543	0.4972	-1.73509	0.0566072	0.187843
Aagab	0.145383	0.837881	0.932074	0.359237	0.574441	0.845052	-0.272834	0.643981	0.770141
Aak1	-0.347118	0.677983	0.849847	-0.225028	0.765971	0.933111	-0.689834	0.252414	0.443556
Aars	1.91299	0.0603487	0.294075	1.13401	0.130291	0.477727	2.85349	0.000929224	0.011671
Aatk	-1.00378	0.27786	0.621535	-0.102055	0.890449	0.968875	-1.48111	0.0971469	0.256607
Abca2	-0.141438	0.871435	0.946819	3.99432e-05	0.992116	1	-0.157811	0.814927	0.88638
Abca5	-0.352009	0.561271	0.782526	-0.185213	0.790281	0.940385	-0.799215	0.12206	0.295514
Abcb6	-0.146636	0.884992	0.952521	0.164317	0.804142	0.944712	-0.616704	0.343467	0.524173
Abcc1	0.253673	0.739454	0.881529	0.171769	0.832995	0.949266	1.78682	0.00362759	0.0293276
Abcc10	-1.27241	0.197283	0.537326	-0.785875	0.30348	0.672283	-2.59841	0.00188938	0.0191376
Abcc5	-0.21168	0.727387	0.87363	0.273864	0.639031	0.881761	-0.0140954	0.974616	0.987615
Abcd3	1.55956	0.0773242	0.33869	1.37216	0.0738985	0.362211	1.7745	0.00357143	0.0291753
Abcd4	-0.483707	0.53327	0.770716	-0.00540229	1	1	-1.07776	0.141538	0.31916
Abce1	2.73272	0.0110749	0.144896	2.63989	0.0105309	0.170226	2.68064	0.00109787	0.0130672
Abcf3	-0.982682	0.117319	0.417103	-0.686203	0.292707	0.663012	-0.460513	0.494721	0.655107
Abhd2	-0.827874	0.184426	0.523708	-0.722115	0.398445	0.745822	-0.119095	0.847741	0.907879
Abhd5	1.07271	0.10421	0.391881	1.44319	0.0260081	0.229868	1.07619	0.104986	0.268012
Abi1	1.60091	0.0479047	0.26238	1.55748	0.111066	0.443708	1.44701	0.0172611	0.0883993
Abi2	0.238361	0.671015	0.846179	-0.426422	0.566961	0.843051	-0.302174	0.553548	0.702634
Abi3	-1.71706	0.0501418	0.267707	0.197951	0.83233	0.949075	-0.687756	0.480808	0.643983
Abl1	-0.236951	0.694461	0.856211	-0.100968	0.883725	0.964971	-0.174263	0.743347	0.839042
Abl2	-0.446803	0.558321	0.780903	-0.536304	0.466415	0.79225	-0.166875	0.779704	0.861877
Abr	0.342488	0.553849	0.778768	0.156263	0.809476	0.945857	0.321476	0.521893	0.678185
Abt1	-0.534607	0.527335	0.76681	-1.23128	0.0373746	0.270289	-1.83402	0.00356159	0.0291424
Acaca	1.00592	0.138233	0.452948	1.11835	0.140897	0.495774	1.55328	0.00852163	0.0548177
Acacb	-0.636769	0.473518	0.744885	-1.23932	0.161761	0.526012	-1.00483	0.230499	0.423876
Acad9	-0.46974	0.483981	0.747158	-0.694093	0.307093	0.675498	-1.07423	0.0580022	0.190087
Acadsb	-0.131051	0.871819	0.946827	-0.105573	0.911454	0.974426	-1.02639	0.180576	0.368038
Acap2	1.3112	0.103561	0.391196	1.06837	0.218002	0.592022	0.72557	0.170665	0.355342
Acbd3	1.26931	0.0491392	0.265401	1.07193	0.197006	0.57401	0.983279	0.12609	0.300678
Acbd5	1.65993	0.0292359	0.209901	1.30311	0.0436449	0.288815	1.24546	0.0294293	0.124953
Acbd6	0.123591	0.881712	0.950584	0.538324	0.503803	0.812815	1.01163	0.223539	0.416133
Acer3	0.335197	0.621729	0.817259	0.582205	0.402049	0.748386	0.601457	0.279162	0.468597
Acin1	0.421781	0.580964	0.795954	0.658598	0.305058	0.673379	1.29029	0.0221485	0.102936
Aco1	0.244099	0.692355	0.856211	-1.06467	0.177428	0.551249	0.300203	0.583243	0.725121
Aco2	1.51675	0.0454002	0.255994	0.519505	0.402576	0.748858	1.77364	0.00371523	0.0298369
Acot11	-2.22064	0.010296	0.139763	-0.966813	0.174937	0.54759	-0.721794	0.439743	0.610971
Acot7	0.253077	0.768125	0.898527	-1.09975	0.17143	0.543729	1.66271	0.041464	0.156365
Acox1	0.868951	0.265251	0.609338	-0.449622	0.593095	0.856239	1.03859	0.162135	0.343699
Acp1	0.548424	0.407309	0.713364	0.810248	0.274679	0.645711	0.0440606	0.933126	0.962897
Acp2	-1.19322	0.0482201	0.263289	-1.30137	0.0553296	0.315496	-1.0165	0.060912	0.195102
Acp6	-0.0536198	0.949417	0.981253	0.733651	0.355399	0.712785	-0.0507936	0.925213	0.958393
Acsl1	-0.114228	0.874751	0.9479	0.287434	0.640058	0.88245	0.307678	0.585814	0.727057
Acsl3	1.50554	0.0844181	0.354392	1.37874	0.0462805	0.294934	1.21476	0.0342116	0.138389
Acsl4	2.52014	0.00829063	0.129745	2.23638	0.00295236	0.122393	3.02594	4.36249e-05	0.00184178
Acsl5	0.585394	0.446358	0.732126	-0.00884019	0.990824	1	0.306959	0.619396	0.752467
Acta2	2.63663	0.0394885	0.240112	1.29402	0.0822881	0.384235	2.08017	0.00976014	0.060019
Actb	4.67898	0.000619061	0.102938	2.46408	0.0246217	0.225812	4.4218	5.92056e-05	0.0021407
Actg1	4.2411	0.00105368	0.102938	3.18835	0.00786542	0.158407	2.56888	0.00162444	0.0169671
Actn1	2.97414	0.00356582	0.107378	1.90758	0.0250986	0.226944	2.4804	0.00423325	0.0326695
Actn4	2.63407	0.0122866	0.152656	1.83577	0.0375462	0.270289	3.16844	0.000184168	0.00416784
Actr10	1.02018	0.188689	0.528413	1.20322	0.0777377	0.374268	1.37168	0.043783	0.161788
Actr2	2.3522	0.0259511	0.203398	2.48546	0.0139914	0.183047	2.13774	0.0043752	0.0335129
Actr3	2.9332	0.00321969	0.107378	2.19376	0.036804	0.269539	2.98131	0.000196615	0.00428064
Acvr1	-0.419002	0.508996	0.757199	-1.56404	0.0639949	0.333557	0.0257963	0.96821	0.984437
Acvr2a	-0.746941	0.254216	0.600744	0.109515	0.869132	0.961153	-0.231274	0.702804	0.811204
Acy3	-0.662911	0.481216	0.746378	-1.59521	0.0248999	0.226944	-0.429289	0.658458	0.780948
Adam10	2.34521	0.00891651	0.133323	2.00021	0.00151729	0.122393	1.71443	0.00230985	0.0216344
Adam12	-0.651295	0.304028	0.642976	-0.934592	0.118816	0.455868	-0.469147	0.3562	0.53544
Adam17	1.07651	0.115462	0.414641	1.35219	0.0459323	0.293906	1.33144	0.0394684	0.151366
Adam19	0.0994172	0.891438	0.955343	0.413182	0.609892	0.864343	-0.296858	0.648737	0.773986
Adam22	-0.997056	0.214285	0.560129	-0.363892	0.685422	0.903733	-1.45314	0.0682002	0.209436
Adamts1	0.839039	0.205173	0.546257	0.456704	0.508864	0.815048	0.775466	0.149477	0.329362
Adamts12	-0.710534	0.326478	0.660265	0.0602343	0.917318	0.975159	-0.913408	0.213372	0.404827
Adamts2	0.235442	0.728559	0.874409	-0.511786	0.456752	0.786994	0.327432	0.589664	0.729853
Adamts5	1.70796	0.0736787	0.328961	0.361104	0.594948	0.85659	-0.332404	0.500671	0.659874
Adamts7	0.0183619	0.974017	0.993315	-1.24666	0.125243	0.467822	-1.18583	0.125529	0.300171
Adamts9	-0.532372	0.473614	0.744885	-0.387959	0.54538	0.831098	-1.48037	0.0611768	0.195268
Adamtsl1	-0.772648	0.331042	0.663376	-1.29044	0.0472011	0.296423	-0.863954	0.349983	0.530027
Adar	0.0316406	0.963754	0.988256	-0.473454	0.538535	0.828962	-0.0191063	0.97464	0.987615
Adarb1	-2.05633	0.000544976	0.102938	-1.00322	0.0979856	0.41825	-0.766472	0.289491	0.477323
Adat2	1.13455	0.209691	0.553302	1.16632	0.189903	0.568137	-0.621264	0.331669	0.51413
Adcy1	-0.264209	0.724956	0.871689	-0.465469	0.490032	0.803499	-0.559155	0.314358	0.497271
Adcy6	-0.573481	0.481067	0.746378	-0.667232	0.296411	0.666295	-0.682937	0.209217	0.400269
Adcy7	-0.285125	0.781243	0.903963	-0.311797	0.746721	0.928736	-0.599124	0.546141	0.697638
Add1	2.29987	0.00185321	0.102938	1.48328	0.0242927	0.22435	1.09815	0.0662415	0.205737
Add3	0.903937	0.152587	0.472042	0.774131	0.244694	0.624667	0.411553	0.390528	0.568041
Adh5	1.19038	0.127185	0.434238	2.34077	0.00601764	0.149508	1.20155	0.0323835	0.133685
Adipor1	2.1647	0.028953	0.208555	1.68758	0.0194027	0.203483	1.87103	0.00752157	0.0501838
Adipor2	-1.25703	0.0783412	0.340816	-0.516529	0.566432	0.84278	-0.230497	0.699696	0.808852
Adnp	1.99528	0.0197695	0.179472	1.77859	0.0151138	0.188416	1.54796	0.0111991	0.0658357
Ado	0.125435	0.836255	0.931149	-0.211979	0.725976	0.921501	-0.249454	0.618704	0.752086
Adprh	-0.0345211	0.984974	0.996763	0.183585	0.797093	0.942036	-0.749972	0.214557	0.405969
Adrbk1	0.668017	0.308484	0.645334	0.54313	0.53494	0.828133	0.832037	0.170106	0.354779
Adrm1	2.63152	0.00497417	0.112331	2.96631	0.00150245	0.122393	2.83657	0.000251999	0.00488819
Adss	1.65011	0.0221711	0.189242	1.56266	0.121499	0.461383	2.44663	0.000245215	0.00477973
Aebp1	1.90066	0.0425101	0.24816	0.722529	0.390042	0.742077	2.83868	0.00314146	0.0266206
Aebp2	0.791484	0.297467	0.640512	0.933059	0.208508	0.583591	0.434304	0.398443	0.574692
Aen	0.824402	0.170322	0.500653	1.38661	0.0333786	0.258388	1.94748	0.00277713	0.0245207
Afap1	-0.438394	0.458123	0.740544	-0.441585	0.459576	0.788294	-0.23528	0.624229	0.755694
Aff1	-0.739732	0.220985	0.567892	0.337442	0.644891	0.885712	0.799031	0.200612	0.389161
Aff3	-1.53702	0.0387245	0.238727	-1.09491	0.0990885	0.419748	-1.71957	0.00293688	0.0254834
Aff4	1.80238	0.0398459	0.240607	1.37121	0.0777377	0.374268	2.07133	0.00455827	0.0344299
Afg3l2	1.40699	0.0615288	0.298066	1.18957	0.0855076	0.389474	1.75651	0.00411072	0.032019
Aftph	0.401757	0.532328	0.770241	0.197913	0.739396	0.926617	0.246695	0.609495	0.745582
Agap1	-0.159018	0.807097	0.917181	0.0665065	0.920974	0.976499	0.325545	0.557909	0.706228
Agfg1	1.68994	0.0487829	0.264385	1.46362	0.0417909	0.283726	2.66393	4.7286e-05	0.00193142
Aggf1	-0.162654	0.832303	0.92922	-0.232201	0.756902	0.931002	-0.0450722	0.944933	0.970827
Agk	-0.745559	0.273259	0.617567	-0.114121	0.880459	0.964339	-0.894183	0.228789	0.421811
Agl	0.238561	0.733358	0.877445	0.120971	0.858603	0.956245	-0.0746229	0.887838	0.934074
Agpat3	-0.0543035	0.923378	0.97031	-0.347634	0.568367	0.843306	-0.0561915	0.923156	0.957065
Agpat5	0.546074	0.378983	0.694525	0.790196	0.217044	0.590746	0.128009	0.855714	0.913537
Agpat6	0.0756815	0.908847	0.963669	-0.206328	0.811706	0.945857	0.67444	0.231013	0.424199
Agphd1	-1.09583	0.109704	0.402451	-0.797516	0.235972	0.61426	-0.879598	0.244833	0.43696
Agps	1.43531	0.0482661	0.263289	1.06495	0.1737	0.545759	1.23096	0.0233982	0.106479
Agtpbp1	-0.0163668	0.973561	0.993315	0.626207	0.447327	0.781459	0.35022	0.52971	0.683075
Ahctf1	0.916776	0.198166	0.537864	0.77961	0.2542	0.63176	1.31612	0.0438284	0.161788
Ahcyl2	0.2245	0.720631	0.868839	0.715644	0.278354	0.648632	0.124703	0.8094	0.882745
Ahi1	-0.481284	0.547246	0.77578	-0.285115	0.729727	0.923352	-0.532144	0.493482	0.654305
Ahnak	1.67738	0.0701422	0.32065	0.96878	0.203866	0.57833	1.13466	0.107595	0.272597
Ahr	-0.0192751	0.994367	0.99925	-0.772162	0.311412	0.678135	-0.695976	0.271774	0.46175
Ahsa2	1.05277	0.0997285	0.385116	1.76851	0.009548	0.167832	2.27314	0.000428835	0.00690535
Aida	1.51229	0.057676	0.288248	1.10377	0.0927535	0.409485	0.613024	0.206541	0.396206
Aif1l	-1.19995	0.099131	0.384286	0.652644	0.431235	0.770036	-0.220159	0.782149	0.86363
Aifm2	0.431604	0.584253	0.797559	0.803045	0.346784	0.704222	0.0944522	0.873383	0.925465
Aim1	-0.602031	0.517302	0.761925	-1.73107	0.031162	0.252477	-1.1706	0.153757	0.333971
Ajuba	0.214054	0.786426	0.905986	-0.261695	0.752934	0.930441	-0.796287	0.349512	0.529857
Ak2	0.76873	0.256794	0.603714	1.04007	0.0933039	0.410045	0.858177	0.128655	0.303741
Ak3	0.758345	0.241874	0.590105	0.61097	0.318171	0.685166	0.108627	0.824225	0.891668
Ak4	-0.245819	0.691937	0.856211	-0.159547	0.809109	0.945857	-0.646257	0.243772	0.435995
Akap10	0.492451	0.388389	0.700383	-1.24762	0.117106	0.453618	-0.15368	0.780897	0.862817
Akap11	0.969569	0.22058	0.567721	1.35987	0.090753	0.405093	1.09725	0.0992508	0.259842
Akap12	0.848189	0.227977	0.577335	0.302353	0.648303	0.887001	0.539997	0.300248	0.486047
Akap13	0.249445	0.709627	0.863095	-0.289107	0.678032	0.899307	-0.105831	0.846869	0.907245
Akap2	1.67961	0.0536024	0.277627	1.14747	0.145536	0.500223	2.018	0.0045731	0.0344457
Akap5	-1.05918	0.246983	0.594721	-1.38186	0.0554504	0.315496	-1.00985	0.266215	0.457148
Akap6	-1.00841	0.228673	0.578185	-0.836428	0.220849	0.595568	-1.5489	0.0616862	0.195899
Akap9	0.34061	0.655853	0.837684	0.578863	0.473478	0.795497	0.376829	0.533646	0.685936
Akirin1	0.906284	0.149119	0.469995	0.762993	0.33613	0.698293	0.570721	0.278031	0.467479
Akirin2	2.36139	0.0049425	0.112331	2.04752	0.0251608	0.226944	1.86436	0.00552229	0.0392855
Akna	0.193973	0.83358	0.930026	-0.879956	0.182014	0.55929	-0.261727	0.675466	0.792563
Akr1b8	3.31297	0.00106369	0.102938	2.44094	0.0104013	0.170226	2.78664	0.00111633	0.0131748
Akt3	1.26516	0.15059	0.470501	2.14626	0.0398214	0.275949	1.37166	0.026388	0.116089
Alad	-0.419254	0.561417	0.782526	-0.0969041	0.900799	0.972607	-0.47621	0.36509	0.544923
Aldh18a1	0.287074	0.677356	0.849626	0.436517	0.488086	0.801879	1.69656	0.00872761	0.0558125
Aldh1l2	1.21868	0.106276	0.395264	1.88792	0.012337	0.178569	2.56917	0.000293802	0.00535979
Aldh2	-0.441418	0.523482	0.765504	-0.778087	0.304292	0.672576	0.199584	0.786492	0.866279
Aldh3a2	1.24236	0.0845585	0.354392	1.43416	0.0339426	0.261145	0.978647	0.100186	0.261672
Aldh5a1	-1.69059	0.0219637	0.188625	-0.656383	0.326534	0.691031	-1.47617	0.0534852	0.182286
Aldh6a1	-0.207405	0.747116	0.886891	0.146392	0.835556	0.949403	-1.45464	0.0351704	0.140546
Alg10b	-0.255481	0.701082	0.858434	0.0719234	0.908184	0.974315	0.0714542	0.909315	0.948945
Alg11	0.135428	0.807776	0.917329	0.0687413	0.937848	0.982596	-0.344475	0.497394	0.656917
Alg6	1.13551	0.118813	0.418956	0.75608	0.291492	0.661832	0.680272	0.327863	0.511389
Alkbh5	0.313432	0.696906	0.856432	0.139328	0.836127	0.949403	0.153975	0.783163	0.86456
Alms1	-0.505143	0.497888	0.753267	-0.224096	0.758451	0.931241	-0.65096	0.225265	0.418385
Alpk1	-1.12567	0.189356	0.528866	-1.47798	0.036874	0.269658	-0.885718	0.211581	0.402892
Als2	-0.961175	0.10182	0.388122	-0.387019	0.519996	0.82051	-0.414291	0.415291	0.590219
Alyref	3.77712	0.00232208	0.105822	3.35131	0.0079771	0.158407	3.79618	1.34036e-05	0.000975935
Amacr	-0.398345	0.53413	0.770716	-0.550667	0.439028	0.774102	-1.2122	0.115426	0.28606
Ambra1	-0.715534	0.297067	0.640512	-1.25733	0.130723	0.477727	-0.602567	0.241975	0.434687
Amer1	-0.539182	0.417685	0.716994	0.0177679	0.985121	1	-0.38433	0.59994	0.739006
Amfr	1.58286	0.0314844	0.217067	1.17737	0.184675	0.562649	1.75418	0.00186901	0.0190079
Amigo1	-1.31818	0.185043	0.523749	-0.860797	0.21254	0.586199	-1.45311	0.10253	0.264321
Amigo2	-1.28528	0.0774817	0.338789	-1.00144	0.249816	0.627904	-2.0251	0.0184325	0.0917871
Ammecr1l	-0.401103	0.544587	0.77578	-0.172608	0.809532	0.945857	-0.211516	0.683059	0.797121
Amotl1	-0.446337	0.495171	0.751783	-1.06793	0.19871	0.57401	0.349149	0.56683	0.713405
Amotl2	1.61275	0.017472	0.171904	0.36691	0.541903	0.830037	1.11939	0.0256092	0.113758
Ampd2	0.619071	0.307068	0.644697	-0.76236	0.322589	0.689067	0.549232	0.390521	0.568041
Anapc1	0.905193	0.240047	0.590105	0.0936887	0.894827	0.970062	0.955938	0.122837	0.29613
Anapc11	-0.013779	0.989121	0.99766	-0.51897	0.423251	0.763112	-0.61017	0.300244	0.486047
Anapc4	2.43633	0.00922576	0.134349	1.88731	0.014558	0.18658	2.02311	0.00353795	0.0290795
Anapc5	1.10169	0.202442	0.542634	1.03744	0.165837	0.533553	1.207	0.0582265	0.19018
Anapc7	0.189318	0.787413	0.906499	-0.0626772	0.959015	0.990157	0.480695	0.479754	0.643085
Angptl2	1.56241	0.0593913	0.292531	0.308673	0.706062	0.913299	1.11972	0.119241	0.29081
Ank	2.4476	0.0227845	0.19113	2.38837	0.0448232	0.290452	1.66234	0.0123248	0.069651
Ank2	-0.242304	0.671593	0.846484	0.161312	0.788117	0.940121	0.178959	0.710778	0.816846
Ank3	-0.368803	0.572946	0.789924	-0.577187	0.358745	0.716349	-0.898167	0.0806518	0.230094
Ankfy1	0.914711	0.229703	0.579913	1.08883	0.172092	0.544311	1.32347	0.030034	0.126692
Ankib1	0.31844	0.595226	0.803955	0.533472	0.409142	0.754878	0.36522	0.519892	0.677019
Ankle2	0.25133	0.688376	0.855193	0.269673	0.668175	0.896087	0.269751	0.603044	0.740977
Ankra2	-0.0528237	0.954372	0.984956	0.414983	0.577412	0.845052	-0.501432	0.494554	0.655097
Ankrd1	1.61458	0.0348501	0.226768	1.03471	0.189248	0.567484	1.76685	0.0154947	0.0817703
Ankrd10	-0.612838	0.356216	0.680468	0.0974699	0.891182	0.968875	-0.526273	0.350532	0.530027
Ankrd11	0.310608	0.694419	0.856211	0.6305	0.377054	0.731679	2.06918	0.00460634	0.0346441
Ankrd12	0.759168	0.366858	0.688497	1.18689	0.169771	0.540513	0.992346	0.151787	0.332277
Ankrd13a	0.20824	0.806502	0.917181	0.163499	0.827919	0.948805	0.422008	0.524352	0.679305
Ankrd17	1.86982	0.0526139	0.275346	2.03483	0.0182773	0.199525	2.35022	0.00169742	0.0175831
Ankrd26	0.626891	0.267574	0.611041	0.65419	0.252903	0.630562	0.335363	0.55982	0.707201
Ankrd28	0.350406	0.592718	0.80238	0.0979292	0.875141	0.96248	0.273232	0.612084	0.747293
Ankrd39	-0.34552	0.755768	0.891583	-0.286245	0.743903	0.927289	-1.55553	0.0703249	0.213574
Ankrd49	-1.11626	0.131334	0.441353	-0.0604169	0.960116	0.990157	-0.528009	0.493986	0.654651
Ankrd50	0.0524405	0.934397	0.975913	-0.767578	0.196834	0.57401	-0.884258	0.07609	0.222512
Ankrd52	-0.615674	0.36006	0.682531	-1.39504	0.0230533	0.221047	-0.372322	0.460839	0.626761
Anks1b	-0.996412	0.20118	0.541076	-0.368763	0.594842	0.85659	-1.54809	0.0437977	0.161788
Anln	3.09649	0.00716244	0.126705	2.26083	0.00626888	0.150693	1.43308	0.0214387	0.100321
Ano6	0.995885	0.157793	0.481916	0.687136	0.272032	0.643552	1.14453	0.0499606	0.175526
Ano8	-0.608525	0.401356	0.708419	-1.19864	0.0962159	0.414926	-1.34211	0.0254236	0.113196
Anp32a	2.45332	0.00373317	0.107378	1.85061	0.00225015	0.122393	1.04943	0.0886027	0.243246
Anp32b	2.31066	0.070098	0.32065	2.52003	0.0209638	0.211366	2.28658	0.00822134	0.0535026
Antxr1	0.459075	0.472608	0.744362	0.15694	0.799449	0.943045	0.0136129	0.992884	0.999248
Antxr2	-0.112516	0.84256	0.93497	-0.573352	0.341469	0.701927	0.806732	0.168876	0.353662
Anxa4	3.29276	0.00060225	0.102938	2.57643	0.00106725	0.122393	2.77477	0.000196821	0.00428064
Aoc2	-1.25217	0.154858	0.477304	0.791666	0.280053	0.65027	-0.701824	0.414838	0.589908
Aox1	-0.758504	0.412342	0.71484	0.861495	0.434756	0.770922	-0.284683	0.706801	0.814069
Ap1b1	0.125043	0.857492	0.941873	-0.325295	0.627602	0.875854	0.205319	0.769244	0.856155
Ap1g1	0.145718	0.811851	0.92025	-0.0024125	1	1	0.315498	0.547175	0.698308
Ap1m1	1.95586	0.0120732	0.150965	1.16174	0.127124	0.471345	1.41969	0.054314	0.183111
Ap1s3	-0.897338	0.460429	0.741747	-0.841671	0.328387	0.692507	-1.19573	0.245481	0.43765
Ap2a1	-0.381488	0.682721	0.853177	-1.41754	0.040243	0.277697	-0.263322	0.683489	0.797271
Ap2b1	-0.448499	0.439496	0.72813	-1.51736	0.016218	0.193538	-0.234623	0.652311	0.776223
Ap2m1	0.749934	0.278016	0.621608	-0.201934	0.733203	0.924369	1.26062	0.0445417	0.163434
Ap3b1	1.0399	0.124048	0.429752	0.433462	0.594611	0.85659	1.1567	0.0472988	0.169372
Ap3d1	1.24572	0.0755026	0.334207	0.934655	0.111104	0.443708	1.74639	0.00323589	0.0271858
Ap3m1	2.01642	0.00314792	0.107378	0.449682	0.6419	0.883113	0.78384	0.183222	0.370724
Ap3m2	-0.553408	0.517051	0.761925	-0.94826	0.257099	0.634096	-1.06044	0.181368	0.368774
Ap3s1	3.03746	0.00926448	0.134522	2.89744	0.0108166	0.170359	1.58697	0.0213686	0.100146
Ap3s2	-0.692285	0.328099	0.6612	-2.72578	0.00050288	0.11887	-0.788467	0.183005	0.370576
Ap4e1	-0.9587	0.135534	0.44886	-0.987895	0.179681	0.554836	-1.0657	0.0705277	0.213574
Ap5m1	-0.170086	0.792968	0.90956	-0.207129	0.760461	0.932753	-0.809742	0.247556	0.439012
Apaf1	-0.184811	0.761235	0.894734	0.227289	0.729646	0.923352	-0.136565	0.804917	0.879875
Apbb2	1.16916	0.144644	0.463603	1.3493	0.0923292	0.408604	0.961327	0.100745	0.262105
Apc	0.330938	0.67731	0.849626	0.504679	0.484558	0.801037	0.714391	0.249119	0.44054
Apc2	-1.26089	0.207095	0.547934	-1.6148	0.0138117	0.183035	-1.14844	0.239234	0.43281
Aph1a	-0.713124	0.330244	0.662863	0.0120727	0.983978	1	-0.794464	0.139764	0.317008
Api5	1.45147	0.0563206	0.285237	1.2993	0.0530387	0.310279	1.93137	0.00750605	0.0501838
Aplf	-1.01829	0.300632	0.642375	-0.605813	0.463867	0.791797	-1.19348	0.165879	0.348556
Aplp2	0.316417	0.634247	0.824661	-0.447205	0.494196	0.805594	0.961937	0.0878857	0.242386
Apob	-1.21669	0.246387	0.593976	-1.15056	0.113499	0.44688	-1.42564	0.09853	0.258899
Apobec1	0.264708	0.700401	0.858434	0.0620692	0.95001	0.987963	0.0900104	0.886422	0.933731
Apobr	-0.368061	0.603569	0.806686	-0.313881	0.707889	0.914716	-0.366458	0.505806	0.663819
Appbp2	0.935572	0.219481	0.566345	0.887019	0.188602	0.566741	1.27988	0.0421865	0.157517
Aqp7	-1.45292	0.197326	0.537326	-1.37887	0.0856745	0.389881	-1.70765	0.0655657	0.204104
Aqr	0.723319	0.281222	0.625158	0.629165	0.30803	0.676765	0.974376	0.139593	0.316908
Arap1	-0.22907	0.783033	0.904233	-0.496061	0.481846	0.801036	-1.82836	0.00500525	0.0368715
Arcn1	1.49168	0.0908715	0.369069	0.979285	0.177025	0.551249	1.13474	0.0923184	0.250436
Arf1	2.95288	0.00587531	0.116211	2.33599	0.00746418	0.157563	2.47064	0.000956685	0.011897
Arf2	0.0663544	0.935763	0.975913	-0.845103	0.351766	0.709306	0.591546	0.39431	0.571478
Arf3	0.106289	0.885216	0.952521	-0.669346	0.365497	0.720101	-0.510191	0.328616	0.511928
Arf6	1.89671	0.0491815	0.265401	1.2244	0.086536	0.39238	1.17113	0.043924	0.162022
Arfgap1	-1.19958	0.0957421	0.379913	-0.332903	0.718155	0.919609	-0.67805	0.217235	0.409526
Arfgap2	-0.691671	0.407995	0.713364	-0.887506	0.225999	0.601652	-0.821199	0.224205	0.417028
Arfgap3	1.12794	0.157722	0.481916	1.60916	0.00827098	0.159504	0.551763	0.355731	0.535097
Arfgef1	1.42043	0.0772717	0.33869	0.950667	0.197184	0.57401	1.8876	0.00507825	0.0371912
Arfgef2	-0.00987824	0.988801	0.99766	-0.41707	0.509318	0.815048	-0.182667	0.714399	0.81936
Arfip1	0.574117	0.452613	0.736414	1.03711	0.184868	0.562896	0.899495	0.235161	0.427751
Arglu1	1.498	0.032748	0.220675	0.667846	0.388712	0.741135	1.13769	0.0664976	0.205903
Arhgap1	0.572424	0.406286	0.712205	-0.0523106	0.940057	0.983516	0.539865	0.350573	0.530027
Arhgap11a	1.9964	0.0153364	0.165466	1.54223	0.0199543	0.206277	1.5899	0.00635481	0.0440975
Arhgap18	-0.183439	0.76008	0.894505	0.0280239	0.95919	0.990157	-1.19378	0.0663824	0.205867
Arhgap19	-0.101164	0.865451	0.944976	-0.154643	0.807	0.945295	-1.14856	0.100321	0.261672
Arhgap23	-0.422303	0.545032	0.77578	-0.48269	0.475618	0.796694	-0.742816	0.173876	0.359488
Arhgap24	0.581737	0.334135	0.666752	0.574147	0.481832	0.801036	0.0240547	0.964043	0.982424
Arhgap28	-0.397982	0.573577	0.79036	-1.34182	0.0445024	0.29043	-0.751752	0.253596	0.444652
Arhgap31	-0.348258	0.606062	0.80844	-0.946753	0.145153	0.500223	-0.417352	0.424338	0.597834
Arhgap32	-0.376557	0.555722	0.779885	0.186084	0.779313	0.937421	-0.396945	0.420441	0.594678
Arhgap33	-0.56238	0.552168	0.778768	-1.65855	0.0110612	0.171517	-0.845277	0.30182	0.486163
Arhgap5	1.45602	0.0428721	0.249276	1.50533	0.0818498	0.383237	1.57202	0.00308622	0.0263694
Arhgap6	-0.383249	0.677394	0.849626	-0.598624	0.384351	0.73801	-1.63991	0.0479974	0.170899
Arhgdia	-0.453786	0.495754	0.751783	-0.800344	0.285723	0.657771	0.549382	0.400076	0.575431
Arhgef10	0.200799	0.753045	0.889636	0.257665	0.653487	0.889267	-0.486823	0.346286	0.527035
Arhgef11	-0.339785	0.657431	0.83852	-0.546742	0.509567	0.815048	0.100656	0.858576	0.915426
Arhgef12	0.21692	0.761214	0.894734	0.0975329	0.891497	0.968875	0.603352	0.291869	0.479356
Arhgef15	-0.828837	0.3766	0.694071	0.0299241	0.972795	0.994571	-0.642519	0.517433	0.674646
Arhgef17	-0.499693	0.519683	0.764312	-1.08048	0.105017	0.431404	-0.645788	0.305383	0.489392
Arhgef18	0.133858	0.871768	0.946827	-0.519054	0.522412	0.821625	-0.411445	0.443527	0.614229
Arhgef2	0.245243	0.688319	0.855193	-0.512339	0.394576	0.743623	1.03113	0.0716929	0.215551
Arhgef26	-0.957681	0.311644	0.647458	-1.38743	0.0393003	0.274725	-1.49294	0.0803485	0.229489
Arhgef5	-1.32298	0.0565455	0.2858	-0.173146	0.8182	0.947098	-0.993675	0.103296	0.265044
Arhgef7	-0.503339	0.512221	0.758727	-0.549332	0.432214	0.770795	0.219498	0.705507	0.813138
Arhgef9	-0.524481	0.556068	0.779885	0.0577151	0.940894	0.983636	-1.69868	0.0520111	0.17959
Arid1a	0.396193	0.501753	0.755069	0.0383637	0.956897	0.990157	-0.0732389	0.883086	0.932064
Arid1b	-0.352216	0.593621	0.802787	-0.653534	0.291723	0.661832	-0.308851	0.566781	0.713405
Arid2	0.480515	0.472634	0.744362	0.0626791	0.919446	0.975682	0.342631	0.503442	0.661772
Arid3a	-0.562634	0.471134	0.744362	-0.364855	0.615697	0.868163	-1.31435	0.0671847	0.20742
Arid4a	1.04162	0.0989865	0.384022	0.668109	0.247542	0.627141	0.381983	0.444597	0.615331
Arid4b	1.06108	0.0987342	0.383809	1.54905	0.10646	0.435517	1.2845	0.0196834	0.0959158
Arid5b	0.268712	0.663492	0.841552	0.251119	0.706645	0.913819	0.394846	0.479451	0.643023
Arih1	0.308158	0.627954	0.820804	0.408224	0.557655	0.836815	0.673298	0.235885	0.428757
Arih2	-0.326712	0.589266	0.799554	0.357642	0.551462	0.833747	0.335573	0.559228	0.70663
Arl4a	-0.53019	0.380989	0.694979	-0.262978	0.641945	0.883113	-1.03429	0.0819697	0.232271
Arl4c	-0.331572	0.7173	0.86655	-0.0482434	0.954823	0.989217	0.159069	0.776248	0.859191
Arl5a	1.52919	0.0352743	0.227494	0.408371	0.485434	0.801516	1.12606	0.0382621	0.148242
Arl8a	1.6126	0.0162364	0.167177	0.877258	0.239441	0.617629	1.56208	0.0180474	0.0909382
Arl8b	2.36991	0.00347716	0.107378	1.51628	0.0731555	0.360407	2.55424	0.00048073	0.00743134
Armc1	0.537002	0.411322	0.714489	1.274	0.16138	0.526012	1.18994	0.0283901	0.122083
Armc7	-0.408367	0.658393	0.839065	0.823968	0.276816	0.647451	-0.493272	0.459543	0.626615
Armcx2	1.4985	0.0323281	0.219482	0.915179	0.166723	0.534536	1.17106	0.0507984	0.176862
Armcx3	-0.149422	0.792215	0.909143	0.0810309	0.899797	0.97243	-0.129299	0.814104	0.885973
Armcx4	-1.38577	0.0364857	0.232324	-1.32516	0.0344932	0.262566	-1.00254	0.12156	0.294607
Armcx5	0.772043	0.263558	0.607639	1.27504	0.0658417	0.338576	1.23245	0.0609306	0.195102
Arnt2	-0.566413	0.350848	0.675981	-1.37362	0.0229583	0.221047	-1.10928	0.0573408	0.189014
Arpc1b	2.75559	0.00302781	0.107378	2.59455	0.0100208	0.170226	2.22439	0.00114803	0.0133822
Arpc5	2.8723	0.00729494	0.127756	2.77698	0.00472912	0.141004	1.64219	0.0133635	0.0736217
Arpp19	1.5812	0.0255793	0.202378	1.26021	0.126249	0.469183	1.64434	0.00709419	0.0482092
Arsa	0.210489	0.750877	0.889509	-0.883279	0.207166	0.581855	0.0759389	0.898307	0.940816
Arsb	0.585539	0.388339	0.700383	0.67333	0.265012	0.640414	-0.212714	0.668121	0.787758
Arsg	-1.30811	0.0560797	0.285237	-1.17678	0.196465	0.57401	-0.780383	0.389101	0.566786
Arv1	-1.0958	0.131523	0.441693	-2.56567	0.00269036	0.122393	-1.81297	0.0106705	0.0640486
Arvcf	-0.840536	0.323998	0.659548	-0.766731	0.319892	0.686336	-1.03796	0.188846	0.376216
Asap1	2.70709	0.0067604	0.122487	1.93141	0.0158621	0.19249	1.76313	0.00281855	0.0247559
Asb6	-0.266561	0.782838	0.904233	-0.560783	0.596888	0.857525	-0.467701	0.576277	0.71913
Asb8	-0.375529	0.5066	0.756101	-1.24491	0.166483	0.534449	-0.579864	0.321535	0.505126
Ascc3	1.08811	0.191037	0.530333	1.13871	0.122067	0.462623	1.72235	0.00907337	0.0574837
Asf1a	1.33784	0.078485	0.340816	2.08455	0.0244906	0.225648	1.11899	0.0870232	0.241333
Asf1b	0.255096	0.783743	0.904233	0.308917	0.741772	0.927173	0.25829	0.696536	0.806304
Ash1l	0.410525	0.586256	0.798414	0.268275	0.697654	0.907646	0.683486	0.2599	0.451188
Asic1	-1.33361	0.0828518	0.352752	-0.890097	0.323782	0.690259	-1.96273	0.0176783	0.0898037
Asph	0.143045	0.844516	0.935991	0.173231	0.779832	0.937421	0.0719615	0.886275	0.933731
Aspm	1.37021	0.102262	0.388322	0.752345	0.426495	0.765537	0.351599	0.507789	0.665744
Asxl1	-0.0752779	0.900556	0.959549	0.111461	0.853599	0.955779	-0.229721	0.655691	0.779321
Asxl2	-0.674262	0.24085	0.590105	-0.301909	0.596305	0.857178	-0.292438	0.545678	0.697225
Asxl3	-0.764372	0.345526	0.673649	-0.432591	0.530202	0.825452	-1.47437	0.0429649	0.159656
Atad1	1.75589	0.031654	0.217372	1.38275	0.109936	0.441853	1.40919	0.0116111	0.0672825
Atad2	0.457486	0.58468	0.797782	0.550001	0.455223	0.785924	0.843347	0.209889	0.400627
Atad2b	0.247803	0.690755	0.856211	0.416291	0.564227	0.841514	0.267314	0.624741	0.756054
Atad5	-0.203541	0.73448	0.87816	0.42795	0.491237	0.804511	-0.197234	0.685105	0.798142
Ate1	-0.0746178	0.895526	0.957056	-0.36751	0.547647	0.831638	0.0279237	0.963557	0.982128
Atf1	1.59865	0.0321858	0.219108	1.69188	0.00974115	0.169627	1.49363	0.0143251	0.0771373
Atf2	-0.0446912	0.947565	0.981155	-0.524854	0.393871	0.743623	0.129283	0.813863	0.885973
Atf4	2.83535	0.0052478	0.112331	1.97143	0.0364742	0.26869	3.19725	7.70191e-05	0.0024184
Atf6	0.36847	0.601208	0.806686	0.474652	0.464141	0.791797	0.878938	0.158745	0.339833
Atf7	0.297844	0.694895	0.856211	0.422189	0.509288	0.815048	0.617207	0.274955	0.464483
Atf7ip	-0.105347	0.862203	0.943933	0.320849	0.615304	0.868163	0.315735	0.533702	0.685936
Atg12	1.60233	0.0518115	0.272281	1.61786	0.0895786	0.401466	1.66793	0.00317788	0.0268783
Atg16l1	-0.948368	0.157736	0.481916	-0.566149	0.513982	0.817282	-0.101175	0.873518	0.925465
Atg2a	-0.670675	0.337695	0.67138	0.647131	0.338293	0.700757	-0.00607213	1	1
Atg2b	-0.407069	0.499099	0.753267	-0.983676	0.196516	0.57401	-0.201059	0.722805	0.823068
Atg3	1.97756	0.0179876	0.173257	2.33551	0.0394253	0.274725	2.1529	0.000474827	0.00740154
Atg4c	-1.69174	0.0151309	0.164188	-0.993308	0.198209	0.57401	-1.2534	0.0678738	0.208562
Atg7	-0.517816	0.520128	0.764519	-0.179115	0.802369	0.944712	-0.55862	0.413076	0.588401
Atg9a	-0.112722	0.912887	0.965309	-0.456594	0.562524	0.840356	-0.545791	0.441629	0.612593
Atic	1.02094	0.163581	0.489184	0.0121504	1	1	2.02045	0.00382271	0.0304846
Atl2	0.431334	0.467375	0.74257	0.280755	0.649833	0.887001	-0.122932	0.806238	0.881127
Atl3	1.38224	0.0910375	0.369445	0.438409	0.485737	0.801516	1.05461	0.0634869	0.199349
Atm	0.14429	0.825378	0.925809	-0.382706	0.539542	0.828962	-0.222507	0.683201	0.797121
Atmin	0.629433	0.38557	0.697302	-0.373366	0.643203	0.88436	-0.290456	0.646525	0.772447
Atp10a	0.536624	0.411596	0.714489	0.219693	0.761891	0.933111	0.684857	0.225879	0.418906
Atp11a	0.237114	0.696466	0.856432	0.00178019	1	1	-0.101807	0.854647	0.913174
Atp11c	1.47613	0.059964	0.293339	1.95765	0.0382507	0.271813	1.88279	0.00173544	0.01794
Atp13a2	-0.778865	0.400245	0.70746	0.136777	0.8635	0.958723	-0.743635	0.349869	0.530027
Atp13a3	1.04599	0.152218	0.472042	0.592858	0.360025	0.71805	1.55113	0.0157418	0.0826404
Atp1b3	2.2792	0.00834776	0.129745	1.71255	0.014812	0.187445	2.08988	0.00193621	0.0194551
Atp2a2	2.17386	0.00879304	0.133323	1.97898	0.00698358	0.156585	2.71867	0.000274937	0.00521238
Atp2b1	1.30538	0.150006	0.470138	0.908828	0.310294	0.677875	1.39677	0.051045	0.177106
Atp2b4	-0.743972	0.463301	0.741794	-1.23411	0.0374309	0.270289	-1.32211	0.114448	0.284646
Atp2c1	1.55448	0.084605	0.354392	1.83338	0.00482522	0.141004	1.93264	0.00144158	0.0155854
Atp5b	4.01033	0.00146751	0.102938	2.77201	0.00388425	0.133226	4.24584	1.7708e-05	0.00111206
Atp5c1	2.97664	0.00257755	0.107378	2.12307	0.0280434	0.237145	3.01272	0.000162546	0.00388872
Atp5f1	2.56588	0.0134687	0.159192	2.08405	0.0393751	0.274725	2.33739	0.00206193	0.0201932
Atp6v1a	2.56068	0.00681103	0.122636	2.43819	0.00397328	0.133226	2.25269	0.00144775	0.0155886
Atp6v1b2	1.77309	0.0185302	0.175294	0.0821166	0.951349	0.98807	1.96337	0.0095138	0.0595234
Atp6v1g1	3.17021	0.00233802	0.105822	2.22699	0.00458329	0.140561	3.19877	5.13598e-05	0.00200838
Atp6v1h	2.92307	0.000868664	0.102938	2.15502	0.0206822	0.209914	3.68492	8.21541e-07	0.000281131
Atp7a	0.114244	0.847626	0.937476	-0.255619	0.676721	0.898954	-0.272572	0.604805	0.741994
Atp8b4	-1.62394	0.125444	0.431961	-0.733511	0.423934	0.763112	-0.583237	0.499673	0.659059
Atp9b	0.463898	0.434457	0.723141	-0.129721	0.875661	0.96248	0.674285	0.218583	0.410988
Atr	0.537286	0.463953	0.741794	0.580123	0.416836	0.759863	0.277898	0.666595	0.786698
Atrn	0.281825	0.637907	0.827	0.324391	0.608417	0.863715	0.147304	0.772627	0.858105
Atrnl1	-0.360163	0.551206	0.7781	-0.413069	0.483189	0.801036	-0.298596	0.535936	0.687926
Atrx	2.03237	0.0418436	0.245874	2.28663	0.0171877	0.195125	1.96309	0.00536133	0.0387002
Atxn1	-0.945346	0.116053	0.415871	-0.373376	0.654029	0.889267	-1.10897	0.0503401	0.176002
Atxn10	1.80962	0.0079908	0.129745	0.074449	0.970446	0.993804	1.9542	0.00127409	0.0143521
Atxn1l	-0.305758	0.607123	0.80844	0.127237	0.845562	0.951504	-0.223333	0.687104	0.799446
Atxn3	-0.744578	0.22171	0.568882	-0.814893	0.183345	0.56188	-0.652529	0.211112	0.402209
Atxn7	-0.933452	0.109066	0.40172	-0.361533	0.514853	0.817437	-1.07149	0.0416484	0.156735
Atxn7l3b	0.56993	0.376825	0.694221	0.427135	0.473341	0.795497	0.503666	0.351234	0.530214
Avl9	-0.433441	0.441814	0.72901	-0.308373	0.606683	0.862716	0.273149	0.573462	0.717042
Axin1	-0.196602	0.74144	0.882546	0.564882	0.322413	0.688984	0.874717	0.0931272	0.251457
Azi2	0.0325563	0.968704	0.990934	0.0379824	0.965116	0.992436	0.559686	0.275183	0.464712
Azin1	1.9637	0.0268322	0.205143	1.97653	0.0170609	0.195125	2.83045	0.000116492	0.00308029
B020004J07Rik	-1.07336	0.299907	0.641983	-1.45459	0.0649019	0.336488	-1.35909	0.152611	0.332939
B230120H23Rik	-0.0363359	0.956943	0.985844	0.208305	0.762722	0.933111	1.12558	0.0885147	0.243137
B2m	2.85507	0.0396021	0.240291	2.90245	0.0267831	0.2312	2.54713	0.00495343	0.036651
B330016D10Rik	0.714934	0.402309	0.709691	1.2517	0.119283	0.457115	-0.15802	0.911642	0.950029
B3galt1	-1.15152	0.0939825	0.37653	-0.902242	0.212548	0.586199	-1.20998	0.0557283	0.186121
B3galtl	-1.07166	0.125156	0.431559	-1.13791	0.0542751	0.313423	-1.09807	0.0955883	0.255071
B3gat2	-0.901045	0.336247	0.669562	-0.0405372	0.972758	0.994571	-1.4845	0.11159	0.279894
B3gnt1	-0.381267	0.523999	0.765504	-0.556362	0.361235	0.718955	-1.67399	0.00916981	0.0578758
B3gnt2	0.127079	0.838976	0.932526	1.06169	0.0948873	0.41226	0.327216	0.573357	0.717042
B3gnt9	-0.271745	0.696957	0.856432	-0.409572	0.577848	0.845052	-0.413184	0.62875	0.758425
B3gntl1	-0.570533	0.425874	0.717228	-0.131776	0.864335	0.958803	-0.423162	0.569832	0.714994
B4galnt2	-0.961903	0.314673	0.650968	-0.801251	0.259392	0.636321	-1.92603	0.0123754	0.0697802
B4galt5	0.786051	0.276396	0.620958	0.557348	0.436009	0.771578	0.803779	0.158866	0.339924
B4galt6	-0.0742963	0.89984	0.959194	-0.168381	0.793135	0.941884	-0.495292	0.344661	0.525493
BC003331	0.425428	0.529615	0.768688	0.843091	0.192368	0.570643	0.48525	0.354034	0.533341
BC005561	-0.376167	0.530636	0.769384	-0.0309734	0.965664	0.992436	-0.448063	0.442724	0.613584
BC016423	0.535164	0.406195	0.712205	0.0487493	0.954957	0.989217	0.468302	0.397131	0.573494
BC018507	0.680846	0.253083	0.600511	0.153666	0.818482	0.947098	0.760021	0.123086	0.296445
BC021785	-1.02514	0.246883	0.594721	-1.0703	0.0840454	0.387736	-0.841632	0.380797	0.559721
BC026590	-0.47581	0.472535	0.744362	-0.527161	0.500921	0.809725	-0.413548	0.443555	0.614229
BC030336	-0.116445	0.85337	0.939785	-0.0848051	0.925439	0.978387	-0.556958	0.374628	0.554297
BC037034	-0.97857	0.230256	0.58057	-0.898215	0.273356	0.643552	-2.32796	0.00448549	0.0340924
BC055324	0.947382	0.190791	0.530281	0.957134	0.247206	0.627141	-0.391058	0.555293	0.704316
Bace1	0.279919	0.65411	0.83702	0.663808	0.281836	0.652208	-0.0715568	0.937245	0.965891
Bach2	-0.672626	0.396688	0.704754	-1.40249	0.0169426	0.195125	-1.81874	0.0272586	0.118878
Bag1	1.87432	0.00883787	0.133323	1.33189	0.192953	0.571915	2.24277	0.00107127	0.0128572
Bag3	0.56821	0.36966	0.689167	1.53841	0.0165451	0.195125	2.64892	0.000714687	0.00999942
Bag4	-0.563017	0.353097	0.67742	-0.715681	0.20936	0.584507	-1.07765	0.0462868	0.16766
Bag5	0.463504	0.483143	0.746863	1.12718	0.0879431	0.396515	0.363937	0.525923	0.680674
Bag6	-0.144917	0.865195	0.944976	-0.778873	0.294555	0.664776	1.03518	0.110707	0.278322
Bahcc1	-0.621406	0.452353	0.736414	-0.529837	0.506017	0.814246	-1.19273	0.135419	0.31066
Bahd1	-0.0649245	0.944784	0.979083	-0.225916	0.740294	0.927173	-0.330922	0.581025	0.723258
Baiap2	-0.530416	0.490579	0.750279	-0.0846345	0.944962	0.984548	-0.298171	0.68404	0.797543
Banp	-0.742957	0.265718	0.609852	1.10373	0.121178	0.461131	-0.170045	0.788062	0.8673
Bap1	0.778611	0.369772	0.689167	0.74498	0.362292	0.718955	1.09895	0.13798	0.314667
Bard1	-0.558787	0.412956	0.715355	-1.64313	0.0135656	0.182229	-0.884765	0.0818452	0.23226
Basp1	1.47342	0.072505	0.326403	1.30764	0.108539	0.440211	0.446912	0.551045	0.700164
Baz1a	0.0215473	0.985071	0.996763	0.757532	0.26815	0.64318	0.747991	0.161528	0.3427
Baz1b	1.12407	0.160671	0.485688	0.705638	0.325944	0.691031	1.67385	0.0158097	0.0827656
Baz2a	-0.465258	0.436984	0.725994	-0.21721	0.743583	0.927218	-0.648085	0.20205	0.391024
Baz2b	0.793235	0.225902	0.573824	1.33855	0.0620092	0.328829	1.14303	0.0401395	0.153005
Bbip1	1.20165	0.162093	0.487879	1.28328	0.115445	0.451244	-0.113652	0.891127	0.936615
Bbs1	-0.719763	0.330538	0.663188	-0.587841	0.42293	0.762949	-1.15195	0.12679	0.300841
Bbs10	0.030998	0.970871	0.992091	-0.0126942	1	1	-0.542846	0.625696	0.756305
Bbs2	-0.286431	0.755432	0.891583	1.01277	0.180157	0.555621	-0.906059	0.268707	0.45949
Bbx	0.188635	0.767639	0.898379	0.254421	0.691039	0.905143	0.44609	0.429898	0.602786
Bcat1	-0.314437	0.646084	0.832132	-0.0659082	0.921104	0.976499	1.39827	0.045371	0.165297
Bcl10	0.413272	0.562295	0.782579	-0.223446	0.74639	0.928736	-0.0619488	0.919622	0.95478
Bcl2	-0.518886	0.461859	0.741747	-1.05668	0.168008	0.536424	-1.16201	0.072767	0.217054
Bcl2l11	-0.858587	0.259531	0.604489	-0.922537	0.262903	0.639005	-0.656145	0.282442	0.471268
Bcl2l13	-0.401501	0.514515	0.759914	0.291278	0.694849	0.905791	-0.567301	0.285005	0.4735
Bcl6	-0.376744	0.537146	0.771696	-1.34678	0.128546	0.473473	-0.282616	0.633109	0.761124
Bcl7a	-0.546861	0.379628	0.694525	-0.991148	0.161541	0.526012	-1.36753	0.0207029	0.0985706
Bcl7b	0.31738	0.697764	0.857107	0.743862	0.28917	0.659269	0.239518	0.722576	0.822993
Bcl9	-0.235746	0.726535	0.872815	-0.680299	0.251506	0.629109	-0.957964	0.0825266	0.23299
Bcl9l	-2.07112	0.00601358	0.117102	-0.83849	0.198291	0.57401	-1.63374	0.0210979	0.0994707
Bclaf1	1.83683	0.0459288	0.257192	1.09601	0.282951	0.654487	1.49769	0.02267	0.10449
Bcr	-0.0608889	0.921497	0.969956	0.400241	0.538602	0.828962	-0.0893402	0.856704	0.914012
Bdnf	0.363959	0.560709	0.782526	0.305152	0.629869	0.877167	0.801543	0.15336	0.333397
Bdp1	0.882884	0.191063	0.530333	1.02408	0.190259	0.568137	1.00008	0.0812357	0.230843
Bend3	-0.443691	0.54118	0.774172	-1.30267	0.0509721	0.307577	-1.05895	0.0917525	0.249305
Bend4	-1.40594	0.11339	0.410823	-0.936365	0.243249	0.623195	-1.44281	0.0904477	0.246962
Best1	0.235935	0.788597	0.907239	1.50968	0.0955551	0.41406	-1.58279	0.160112	0.341392
Bfar	0.37309	0.585361	0.79806	-0.206566	0.799154	0.942919	-0.408323	0.537575	0.689149
Bgn	1.92105	0.118143	0.418287	1.13713	0.240976	0.619899	3.05751	0.000802222	0.0106342
Bhlhe40	0.0135949	0.993481	0.999229	0.100766	0.880284	0.964339	-0.218242	0.720664	0.821933
Bhlhe41	-0.915009	0.180544	0.516369	-1.27978	0.0302882	0.247831	-1.02291	0.11097	0.278756
Bicc1	1.18531	0.083352	0.353683	0.366754	0.653928	0.889267	0.944377	0.159959	0.341245
Birc3	-0.641075	0.337676	0.67138	-0.291743	0.688463	0.905143	-0.741048	0.262566	0.452998
Birc5	0.519344	0.409797	0.714371	0.523865	0.475415	0.796693	-0.0885367	0.88177	0.931262
Birc6	0.904725	0.270532	0.61389	0.948238	0.185683	0.563668	1.40421	0.0376975	0.146816
Blcap	-0.798412	0.277108	0.620978	0.753	0.339334	0.700757	-0.433443	0.531126	0.684375
Blm	0.648777	0.31892	0.655686	0.44928	0.466583	0.79225	0.125469	0.815113	0.886392
Blzf1	0.186289	0.756396	0.89184	-0.149541	0.833654	0.949266	0.0393342	0.95339	0.975485
Bmf	-0.954168	0.281865	0.625184	-0.0884598	0.935295	0.981805	-1.33064	0.137902	0.314663
Bmi1	1.98563	0.0285396	0.207208	1.45599	0.139197	0.492829	1.22011	0.0355244	0.14131
Bmp1	-0.033388	0.977544	0.99416	0.129006	0.87528	0.96248	0.42262	0.544484	0.69623
Bmp2k	0.835979	0.241895	0.590105	0.971939	0.199204	0.57401	1.09955	0.0991648	0.259842
Bmper	0.0538421	0.941421	0.97782	0.378889	0.599014	0.859105	-0.136515	0.860291	0.915894
Bmpr2	1.50071	0.0293815	0.210274	1.21208	0.0635205	0.333385	1.2289	0.0683004	0.209616
Bnc1	-0.0419291	0.968987	0.990934	0.375567	0.558704	0.83739	-0.378772	0.629663	0.759009
Bnc2	-0.880132	0.162693	0.488565	-0.098337	0.894523	0.970015	-0.909223	0.093871	0.252052
Bnip2	0.745112	0.205361	0.546469	-0.366703	0.578677	0.845333	0.804466	0.114812	0.285129
Bnip3l	0.168462	0.784217	0.904271	-1.00014	0.0987988	0.419748	-0.600344	0.255	0.445762
Bod1l	0.86539	0.295492	0.638242	0.549314	0.554787	0.835474	1.01931	0.124363	0.298242
Bpnt1	-0.577736	0.408806	0.713747	-0.126339	0.861145	0.957505	-0.468893	0.407295	0.58248
Bptf	0.654375	0.440265	0.728555	0.881795	0.263309	0.639374	0.758733	0.234877	0.427389
Braf	0.226864	0.755889	0.891583	0.0859173	0.902818	0.972703	-0.363587	0.460248	0.626761
Brap	0.610196	0.319599	0.656176	0.0877578	0.928235	0.979286	1.28641	0.0158151	0.0827656
Brca1	-0.0583596	0.921125	0.969767	0.00739996	1	1	1.07922	0.059988	0.193192
Brca2	0.277463	0.670683	0.846179	-0.0599883	0.925611	0.978387	-0.293849	0.571954	0.716583
Brd1	-0.658487	0.283834	0.626254	-0.844077	0.223096	0.599057	-0.124194	0.833646	0.898629
Brd2	0.811277	0.239053	0.589455	0.606535	0.356094	0.713894	1.86816	0.00664415	0.0456637
Brd4	0.105754	0.853308	0.939785	0.355625	0.546454	0.831098	1.18022	0.0510185	0.177106
Brd7	2.81762	0.0101038	0.139073	2.41203	0.0126576	0.180114	2.68482	0.000290271	0.00535979
Brd8	0.711988	0.368403	0.688798	1.75009	0.0402948	0.277697	1.39817	0.054671	0.183847
Bri3bp	-0.391305	0.601784	0.806686	0.130252	0.859978	0.957123	-0.0684433	0.922438	0.956518
Brip1	-0.990741	0.213529	0.559026	-1.24183	0.115506	0.451244	-1.12429	0.0887449	0.24337
Brix1	2.60991	0.0335153	0.223375	2.44543	0.0508468	0.307577	2.30259	0.00197774	0.0196367
Brms1l	1.11302	0.105399	0.395166	0.620851	0.401668	0.748232	0.468531	0.434433	0.606107
Brox	0.456985	0.466571	0.74257	0.33552	0.655243	0.890195	1.12183	0.0572436	0.188833
Brpf3	-1.03696	0.0901149	0.368418	-0.880131	0.184138	0.562649	-0.26119	0.623468	0.755318
Brwd1	0.157385	0.796064	0.911031	0.209356	0.758259	0.931241	0.32797	0.511733	0.670041
Bsdc1	-0.817883	0.267749	0.611163	-0.0979287	0.915603	0.97451	-0.582782	0.42155	0.595744
Btaf1	0.530756	0.441283	0.728817	0.751274	0.318822	0.685686	1.40823	0.0448235	0.164135
Btbd1	0.782249	0.202934	0.543466	1.0416	0.168561	0.537341	0.364915	0.492436	0.653632
Btbd19	-0.643634	0.532761	0.770241	-0.606359	0.46544	0.792216	-1.50169	0.0318275	0.131714
Btbd7	0.438521	0.490952	0.75061	-0.643766	0.413856	0.758283	0.99308	0.06738	0.207679
Btbd9	-1.03692	0.147576	0.46802	-0.33078	0.649901	0.887001	-0.311794	0.662728	0.784481
Btc	-0.567641	0.536542	0.771237	0.641083	0.401128	0.748058	-0.579568	0.512172	0.670266
Btf3	3.117	0.00503119	0.112331	2.17546	0.05467	0.314114	3.16921	0.000234024	0.00466562
Btf3l4	1.88548	0.0459658	0.257192	1.26636	0.148104	0.504223	1.14011	0.0616352	0.19586
Btg1	0.509337	0.4422	0.729353	-0.00799914	0.994866	1	0.82558	0.169498	0.354225
Btrc	-0.853066	0.275794	0.620506	-0.686387	0.4247	0.763981	-1.09044	0.0585979	0.190671
Bysl	-0.0962731	0.874871	0.9479	-0.702804	0.277151	0.647631	-0.0324406	0.957004	0.978145
Bzw1	2.94729	0.0039388	0.107378	2.03392	0.013448	0.182229	2.78248	0.000229701	0.00461608
C030034I22Rik	-1.28655	0.140441	0.457274	-2.07445	0.0175322	0.196611	-3.70826	5.36982e-06	0.000652212
C030039L03Rik	-1.13191	0.270313	0.613671	-0.59883	0.514769	0.817437	-1.59173	0.0932685	0.251457
C030046E11Rik	-0.0438215	0.94231	0.978335	0.471818	0.454415	0.785069	0.570736	0.262034	0.452685
C130026I21Rik	-0.422534	0.663956	0.841714	-0.281772	0.778173	0.937314	-0.788017	0.404948	0.580113
C1galt1	1.77847	0.0338145	0.224121	0.59948	0.547447	0.831638	1.51496	0.0108421	0.0645181
C1ra	0.811893	0.241457	0.590105	0.763914	0.388658	0.741135	-0.426239	0.499499	0.659003
C1s	1.36635	0.11757	0.417103	0.951926	0.413485	0.758156	0.0417983	0.95524	0.97702
C230081A13Rik	0.23427	0.771076	0.899059	0.190631	0.812614	0.945857	0.0362024	0.956841	0.978145
C2cd2	-0.094402	0.939014	0.976932	0.341773	0.645862	0.886781	0.189743	0.786163	0.866279
C2cd3	-0.485632	0.472346	0.744362	-0.241684	0.684126	0.903026	-0.774068	0.180752	0.368248
C2cd5	0.730941	0.365934	0.687909	0.0508766	0.947462	0.985925	-0.469706	0.605972	0.742538
C330007P06Rik	-0.0396671	0.950647	0.982121	0.0217788	0.965188	0.992436	-0.120101	0.821409	0.890348
C3ar1	-0.982887	0.200482	0.539775	-1.60852	0.0168418	0.195125	-0.826491	0.330981	0.514018
C530008M17Rik	-0.936105	0.250527	0.599166	-0.569898	0.404414	0.750009	-1.29761	0.029332	0.124674
C5ar2	-0.566449	0.561932	0.782526	-0.411353	0.576624	0.845052	-1.4186	0.114332	0.28464
C77080	-0.890306	0.170405	0.500653	-0.0836966	0.911964	0.974426	-1.24185	0.0734377	0.218573
C87436	-0.671965	0.356964	0.680704	-0.638525	0.395945	0.74416	-1.1854	0.141464	0.319135
C920009B18Rik	-0.362447	0.685426	0.854176	-0.823246	0.205864	0.580938	-0.74143	0.249703	0.441418
Cab39	0.937152	0.154422	0.476253	1.09727	0.0693994	0.349111	1.38852	0.0179418	0.0907442
Cabin1	-0.58471	0.42551	0.717228	-0.583081	0.46056	0.789352	-0.297188	0.605247	0.742011
Cables2	-0.592549	0.44531	0.731362	-1.1473	0.0840158	0.387736	-0.506279	0.360262	0.539802
Cachd1	-0.520148	0.385168	0.697077	-1.19624	0.046424	0.294934	0.345359	0.493363	0.654305
Cacna1c	-0.444485	0.501718	0.755069	-0.67868	0.37948	0.734077	-0.609243	0.274118	0.463569
Cacna1e	-0.977612	0.2998	0.641983	0.0267686	0.96588	0.992436	-0.737723	0.456337	0.624187
Cacna2d1	0.885804	0.135915	0.449236	0.662877	0.301426	0.670955	-0.0260308	0.967768	0.984376
Cacna2d4	-1.46897	0.13002	0.438005	-1.19322	0.0651178	0.336488	-1.27182	0.197844	0.385558
Cacnb2	-0.507027	0.543536	0.775114	-0.374613	0.601884	0.859603	-1.03785	0.135769	0.311037
Cacul1	0.00152791	1	1	-0.40526	0.486891	0.801665	0.0511853	0.93067	0.962075
Cad	-0.550065	0.36686	0.688497	-0.0199806	0.988035	1	0.272675	0.624174	0.755694
Cald1	2.96683	0.011387	0.146971	2.52474	0.0100815	0.170226	2.98789	0.000204728	0.00441438
Calm1	2.5446	0.0170899	0.170357	1.98006	0.0366944	0.269521	1.40435	0.0198142	0.0963663
Calm2	2.64881	0.0257943	0.203398	2.27627	0.0267093	0.2312	1.84467	0.0256617	0.113799
Calm3	1.24485	0.0913359	0.369985	0.756581	0.207425	0.581855	0.636646	0.328802	0.512059
Calr	2.36661	0.0135361	0.159192	1.15853	0.080135	0.379476	3.41101	0.000631134	0.0092073
Calu	3.61204	0.00168469	0.102938	3.06951	0.000953485	0.122393	3.99179	6.41443e-06	0.000670263
Camk1d	-0.656314	0.472368	0.744362	-0.0345129	0.974791	0.995751	-1.06982	0.125028	0.299257
Camk2d	2.42611	0.00344947	0.107378	2.07094	0.00769465	0.158407	1.60868	0.00437589	0.0335129
Camk2g	1.15822	0.168105	0.496508	2.22142	0.013202	0.180727	1.25693	0.0585629	0.190671
Camk4	-0.867515	0.425535	0.717228	-0.56944	0.502847	0.811794	-1.25163	0.174102	0.35951
Camsap1	-0.39802	0.539111	0.772531	-0.668689	0.293369	0.66322	-0.0172563	0.974131	0.987615
Camsap2	0.696044	0.358988	0.681873	0.805856	0.320102	0.686336	1.05189	0.100339	0.261672
Camta1	-0.518708	0.414879	0.716937	-0.916165	0.108882	0.440348	-0.95864	0.196842	0.383936
Cand1	0.851318	0.308187	0.645334	0.126631	0.871122	0.961661	0.858101	0.169002	0.353777
Cand2	0.247426	0.713756	0.864465	0.260806	0.692423	0.90527	-0.399809	0.551573	0.700658
Cant1	0.179665	0.828099	0.926586	-0.223371	0.824595	0.948587	-0.656231	0.396288	0.572771
Canx	3.10653	0.00907806	0.133614	2.76957	0.00582959	0.149508	3.83144	2.11053e-05	0.0012623
Cap1	1.71609	0.0495916	0.266611	2.04089	0.00256219	0.122393	2.22971	0.0015388	0.0163791
Capn2	2.46013	0.00467203	0.112331	1.74278	0.0245231	0.225648	2.857	0.000124124	0.00323109
Caprin1	2.58919	0.0123061	0.152656	2.28537	0.00796615	0.158407	2.8547	0.000201837	0.0043708
Capza1	2.49636	0.0201484	0.181083	2.06889	0.0266967	0.2312	2.1723	0.00769431	0.0509598
Capza2	3.45056	0.00322062	0.107378	2.9746	0.00723928	0.157563	2.93024	6.63475e-05	0.00223711
Capzb	3.82123	0.00534506	0.112331	3.69661	0.00209623	0.122393	3.57421	1.034e-05	0.000843802
Car5b	-1.37027	0.152974	0.472948	-2.31964	0.00638913	0.152456	-2.28158	0.0141619	0.0765047
Card6	-0.767955	0.426786	0.717355	-1.33281	0.0328508	0.257299	-1.57625	0.0556294	0.18595
Carhsp1	0.346623	0.56463	0.783402	-0.166836	0.808883	0.945857	0.68791	0.191451	0.379129
Carns1	-0.355631	0.747082	0.886891	-1.02442	0.0943633	0.411172	-0.846386	0.388403	0.566393
Casc3	0.388776	0.546997	0.77578	0.730138	0.425543	0.764911	-0.101906	0.872752	0.925335
Casc4	-0.0596494	0.940263	0.977534	0.675293	0.391355	0.742321	0.740408	0.303048	0.486892
Casc5	0.651459	0.42611	0.717228	0.799996	0.295739	0.665677	0.0546352	0.925522	0.958393
Casd1	0.623323	0.355494	0.679758	0.611993	0.311045	0.678135	-0.13103	0.849231	0.908741
Cask	1.61781	0.0303696	0.214897	1.4309	0.0511478	0.307577	1.81152	0.00201947	0.0198161
Caskin1	-0.67626	0.489729	0.749665	-1.05947	0.17643	0.550628	-1.05946	0.223168	0.416028
Casp3	0.297378	0.705303	0.860476	-1.96886	0.0181878	0.199525	0.474772	0.483555	0.646456
Casp7	-1.1165	0.133339	0.445457	-0.601179	0.344021	0.702599	-0.928351	0.102449	0.264321
Casp8	0.131843	0.870006	0.946679	0.782518	0.183032	0.56173	0.275338	0.618098	0.751804
Casp8ap2	0.665313	0.291866	0.63396	0.265186	0.749906	0.930441	0.679306	0.213247	0.404827
Cav1	2.801	0.0162095	0.167177	1.85604	0.0516464	0.307577	0.262512	0.667966	0.787758
Cbfa2t2	-0.257815	0.658526	0.839065	-0.119472	0.875887	0.96248	0.205574	0.677214	0.793564
Cbfb	1.54026	0.0440086	0.252708	1.694	0.0185826	0.199528	1.41925	0.0096594	0.0597646
Cbl	-0.159986	0.822396	0.923749	-0.280181	0.738948	0.926617	-0.212285	0.718028	0.820734
Cblb	-0.272468	0.624527	0.819009	-0.0495355	0.930545	0.97948	-0.171579	0.717758	0.820734
Cbll1	0.906926	0.17667	0.509067	1.54409	0.0406411	0.279035	0.93878	0.116082	0.286636
Cbx3	1.47963	0.0838917	0.354392	0.723086	0.313757	0.680915	0.567982	0.337383	0.517983
Cbx4	-0.866496	0.205898	0.54674	-0.498216	0.473751	0.795497	-0.919879	0.163661	0.345476
Cbx5	1.51447	0.0845933	0.354392	0.887287	0.249339	0.627904	0.94153	0.136252	0.311575
Cbx6	-0.109951	0.864664	0.944976	-0.0992474	0.874065	0.962429	-0.436093	0.459316	0.626555
Cc2d2a	0.119465	0.872709	0.947215	-0.564662	0.385009	0.73801	-1.07696	0.0709199	0.214381
Ccar1	1.58244	0.123387	0.428025	1.95323	0.0971699	0.416893	2.03585	0.00955531	0.0596862
Ccbe1	-0.169538	0.779266	0.90315	-0.15492	0.803767	0.944712	-0.640619	0.302038	0.486358
Ccdc115	0.784259	0.205577	0.546564	0.482353	0.464968	0.792133	-0.0486664	0.950066	0.973711
Ccdc117	-0.229976	0.723258	0.870544	0.811355	0.219516	0.594211	0.508282	0.311822	0.49453
Ccdc126	0.00517242	0.990702	0.998252	-0.498671	0.58512	0.848804	-1.11446	0.12119	0.294136
Ccdc127	0.0401523	0.957692	0.986111	-0.375819	0.584922	0.848804	-0.511098	0.374667	0.554297
Ccdc132	0.941023	0.133338	0.445457	0.672291	0.243855	0.623475	1.10616	0.0567712	0.188166
Ccdc138	-0.173328	0.831076	0.928056	-0.475056	0.519678	0.82051	-0.760696	0.309621	0.493195
Ccdc14	-1.16121	0.242111	0.590183	-0.847024	0.376458	0.73109	-1.06971	0.199159	0.38737
Ccdc167	-0.881885	0.38284	0.696328	-0.912947	0.275747	0.646172	-1.35149	0.138321	0.314933
Ccdc171	-0.646064	0.354769	0.678994	-1.01363	0.163764	0.529439	-1.61834	0.0194115	0.0949253
Ccdc174	0.923491	0.240658	0.590105	1.44535	0.0609965	0.32705	1.67384	0.0246061	0.110543
Ccdc47	2.36832	0.0222536	0.189242	2.43042	0.0190126	0.201944	3.37134	3.56788e-05	0.00166216
Ccdc50	1.21401	0.132866	0.444849	0.592606	0.353269	0.711351	1.01869	0.101352	0.262741
Ccdc55	0.765809	0.273061	0.617567	1.11848	0.105971	0.434255	0.812313	0.155213	0.335075
Ccdc71	-1.22945	0.0728589	0.326824	-0.852708	0.151394	0.509445	-0.868386	0.142827	0.320483
Ccdc77	-0.587897	0.382607	0.696328	0.857026	0.168053	0.536424	-0.157958	0.803808	0.879237
Ccdc80	0.307533	0.607954	0.808719	0.302091	0.623626	0.873719	-0.471054	0.409039	0.584308
Ccdc82	-0.964346	0.369986	0.689167	-0.617547	0.462714	0.791238	-1.29034	0.187434	0.374997
Ccdc85b	0.754826	0.240634	0.590105	0.374914	0.521148	0.821271	1.37436	0.0210006	0.0994413
Ccdc86	-0.490193	0.434939	0.723555	-0.0108857	1	1	0.49748	0.333407	0.514921
Ccdc88a	0.716657	0.371616	0.689617	0.681204	0.391846	0.742321	1.5992	0.0207187	0.0985706
Ccdc92	-0.837493	0.262125	0.606798	-0.0675128	0.958328	0.990157	-0.853328	0.196433	0.383553
Ccdc93	0.400686	0.504052	0.756101	-0.537255	0.362642	0.718955	0.247414	0.625065	0.756054
Ccdc96	-1.79086	0.0672041	0.31258	-0.106813	0.902348	0.972699	-1.05045	0.220506	0.413177
Ccdc97	-2.15533	0.00982714	0.13808	-1.20654	0.10097	0.423728	-1.11091	0.078544	0.226394
Ccl27a	-0.560581	0.540953	0.774172	-0.324855	0.690212	0.905143	-0.676454	0.517533	0.674646
Ccl28	-1.16612	0.157518	0.481916	-0.792423	0.264905	0.640414	-2.13413	0.0248636	0.111431
Ccl9	-1.68473	0.0505157	0.268278	-1.146	0.277058	0.647631	-0.949825	0.227583	0.420359
Ccm2	-0.7429	0.244325	0.592187	-0.485559	0.590175	0.85374	-0.202304	0.744744	0.839675
Ccna2	3.11348	0.00531065	0.112331	2.066	0.0451561	0.291415	1.87177	0.00419509	0.0325099
Ccnc	0.934801	0.163861	0.489709	0.872299	0.172168	0.544311	0.697096	0.233612	0.426247
Ccnd2	0.606666	0.359924	0.682531	0.37102	0.556961	0.836607	1.29884	0.0581122	0.19018
Ccnd3	-1.37748	0.0984928	0.383809	-0.479722	0.583185	0.847779	-1.95088	0.00301286	0.0259189
Ccng1	3.03218	0.00497027	0.112331	3.00526	0.00135999	0.122393	3.76229	2.903e-06	0.000550251
Ccni	1.87179	0.0167717	0.167851	1.57554	0.037903	0.270875	1.27244	0.0179035	0.0906724
Ccnk	0.49222	0.450081	0.735352	1.56197	0.0712072	0.354906	0.838665	0.132399	0.307381
Ccnl1	2.44046	0.00290959	0.107378	2.63054	0.0017646	0.122393	1.76099	0.0136916	0.0746563
Ccnt2	-0.454002	0.459886	0.741722	0.0720156	0.934599	0.98169	0.190486	0.736022	0.833449
Ccny	1.27157	0.107666	0.399198	0.950134	0.206375	0.580938	1.06468	0.0537657	0.182513
Ccp110	0.459421	0.443804	0.729831	1.11883	0.0573813	0.319605	0.548616	0.28108	0.470089
Ccpg1	-0.929698	0.129112	0.437303	-0.515388	0.436905	0.772075	-1.01342	0.0967433	0.256485
Ccrn4l	1.32147	0.0391259	0.239426	1.62479	0.0183116	0.199525	1.09675	0.0470349	0.169089
Ccser1	-1.66311	0.0516817	0.272122	-1.1419	0.0557766	0.316635	-1.68296	0.0509237	0.177106
Ccser2	0.282993	0.681165	0.852347	0.38365	0.577759	0.845052	0.419451	0.478683	0.642336
Cct2	3.84174	0.00343577	0.107378	3.89293	0.000204791	0.11887	4.65944	8.39364e-07	0.000281131
Cct3	3.94673	0.000953828	0.102938	3.52581	0.00162868	0.122393	3.97873	3.07198e-06	0.000551201
Cct7	1.95451	0.0120148	0.150965	0.971825	0.233514	0.610393	3.2559	0.000649653	0.0094018
Cct8	3.84154	0.00411809	0.108891	3.0431	0.0161174	0.192795	3.86012	3.79914e-05	0.00175109
Cd109	2.93085	0.00451461	0.112331	2.12878	0.0105907	0.170226	2.2744	0.00125345	0.0141832
Cd164	3.21911	0.00572882	0.115126	2.96085	0.0149416	0.18745	3.1919	0.000177274	0.00406683
Cd209c	-1.00056	0.381637	0.695194	-0.998273	0.211676	0.586199	-1.37876	0.129106	0.303741
Cd24a	2.3156	0.00566058	0.114672	1.08215	0.140066	0.494165	0.412255	0.536398	0.687992
Cd274	-0.444808	0.688936	0.855466	-0.524532	0.575482	0.845052	-1.41271	0.11954	0.291396
Cd276	0.15504	0.828019	0.926586	-1.26965	0.0955441	0.41406	-0.310249	0.617443	0.751461
Cd2ap	1.67068	0.0582042	0.289194	1.67687	0.0385046	0.272078	0.905342	0.0969434	0.256517
Cd300lb	0.204444	0.751385	0.889636	0.700855	0.29004	0.659691	-0.369362	0.680986	0.796201
Cd34	1.00408	0.187882	0.5265	0.902585	0.261534	0.637472	1.84806	0.00740062	0.0496405
Cdan1	-0.169164	0.842508	0.93497	-0.023222	0.983372	1	-0.685073	0.311263	0.494207
Cdc14b	-0.282107	0.656442	0.837684	-0.446127	0.432694	0.770922	-0.391756	0.480568	0.643983
Cdc20	1.90058	0.0228892	0.19113	0.992182	0.12007	0.459428	0.568709	0.31066	0.493598
Cdc25a	-0.205627	0.798882	0.912572	-0.617136	0.488388	0.801911	-0.334344	0.565078	0.712289
Cdc27	1.58283	0.0704928	0.32136	1.19639	0.160276	0.525604	1.2951	0.0362383	0.142878
Cdc37	0.737321	0.341499	0.673499	0.779591	0.364464	0.719907	1.9191	0.00456415	0.0344299
Cdc37l1	0.0379913	0.974367	0.993315	-0.0361708	0.958124	0.990157	0.0525789	0.924732	0.958106
Cdc40	1.23043	0.092002	0.371558	1.717	0.0232508	0.221655	1.46424	0.0201907	0.0972559
Cdc42	3.01513	0.00675273	0.122487	1.64483	0.0402787	0.277697	2.52853	0.00132285	0.0146905
Cdc42bpa	0.54406	0.425997	0.717228	0.321453	0.678061	0.899307	1.05407	0.0692574	0.211263
Cdc42bpb	0.459796	0.427999	0.717713	0.864998	0.145707	0.500223	0.589231	0.277715	0.467284
Cdc42ep4	-0.590443	0.403346	0.710738	0.190961	0.755561	0.931002	-1.12179	0.0751183	0.220957
Cdc5l	-0.0202122	0.977564	0.99416	-0.497479	0.559067	0.837433	0.284896	0.621257	0.753547
Cdc6	-1.34209	0.0523607	0.274593	-0.220423	0.751121	0.930441	-0.876178	0.0736507	0.219077
Cdc7	-0.24102	0.693302	0.856211	-0.0482265	0.947287	0.985925	-1.00518	0.115625	0.28606
Cdc73	2.18132	0.0074067	0.127898	2.76018	0.000900785	0.122312	2.64036	2.2012e-05	0.00130104
Cdca3	1.41048	0.095613	0.379913	0.962197	0.162217	0.526441	0.174874	0.841491	0.904117
Cdca5	-0.393094	0.599716	0.806686	-0.367698	0.715367	0.917953	0.0368511	0.946952	0.972106
Cdca8	2.05453	0.0142514	0.161671	2.26902	0.00288774	0.122393	1.74624	0.0152083	0.0807679
Cdh11	2.54537	0.00367981	0.107378	2.49009	0.00154694	0.122393	1.7598	0.0011464	0.0133822
Cdh18	-1.064	0.297768	0.640512	0.255228	0.790412	0.940385	-1.50841	0.169594	0.354276
Cdh2	2.53593	0.000622728	0.102938	1.75016	0.0280854	0.237145	1.99185	0.000500847	0.00767151
Cdip1	0.190279	0.760475	0.894734	0.898378	0.200806	0.576153	-0.0462071	0.936047	0.965231
Cdipt	-0.831793	0.210823	0.555415	-0.642987	0.469989	0.79339	-0.0504213	0.933991	0.963396
Cdk1	3.17468	0.00506043	0.112331	3.20132	0.000531069	0.11887	1.92055	0.00483901	0.0359633
Cdk12	0.361745	0.627157	0.820572	-0.0847076	0.902612	0.972699	0.167798	0.774539	0.859003
Cdk13	1.41543	0.0179226	0.17316	0.669354	0.285327	0.657771	1.21991	0.0183574	0.0917289
Cdk14	0.787554	0.232363	0.583988	0.0969839	0.909796	0.974426	0.398987	0.453432	0.621906
Cdk17	0.802048	0.222395	0.569055	0.655143	0.333415	0.695629	0.902718	0.128507	0.303677
Cdk19	-0.570784	0.345308	0.673649	-0.635271	0.308955	0.676765	-0.773428	0.131066	0.30611
Cdk4	3.26784	0.000109745	0.102938	1.55732	0.0622294	0.329018	3.22774	5.19685e-05	0.00200838
Cdk5rap2	0.748681	0.317077	0.653604	0.784694	0.30476	0.673205	0.815545	0.172682	0.357755
Cdk6	0.414633	0.559972	0.782442	0.224862	0.749714	0.930441	0.43391	0.471953	0.636194
Cdk7	-0.208445	0.78969	0.907469	0.747141	0.336845	0.699302	-0.110185	0.871761	0.924807
Cdk8	0.552226	0.428594	0.71823	1.96615	0.0257818	0.229074	1.40479	0.0115883	0.067228
Cdk9	0.372036	0.513099	0.759296	0.537418	0.375575	0.73109	0.621573	0.217365	0.409617
Cdkl2	-0.126225	0.891476	0.955343	-0.276126	0.694036	0.905653	-0.766124	0.36256	0.542274
Cdkn1a	0.224215	0.766393	0.897729	0.254029	0.717643	0.919609	2.07342	0.0108108	0.0645181
Cdkn1b	-0.11492	0.869669	0.946679	-0.904342	0.17955	0.554771	-1.06319	0.0579452	0.190024
Cdkn2c	0.95985	0.253695	0.600511	-0.526884	0.579227	0.845333	-0.772696	0.253922	0.4447
Cdkn2d	0.500081	0.505413	0.756101	0.0377393	0.967054	0.992436	-1.69867	0.0503414	0.176002
Cdon	-0.354955	0.584358	0.797559	-0.159013	0.838476	0.949958	-0.949023	0.124376	0.298242
Cdr2l	-0.406776	0.575659	0.791708	-1.0406	0.0838692	0.387736	-0.771319	0.173305	0.358573
Cds2	-0.159854	0.816837	0.921993	-0.0284733	0.977744	0.997265	-0.551108	0.32315	0.506711
Cdt1	0.431247	0.534163	0.770716	0.258624	0.766189	0.933111	1.00432	0.131207	0.306169
Cdv3	0.494286	0.552769	0.778768	0.0103391	0.993048	1	0.582083	0.364095	0.543761
Cdyl2	-0.572569	0.474839	0.744885	-0.959136	0.116657	0.45331	-1.19224	0.121412	0.294416
Cebpg	0.521509	0.421894	0.717228	0.417641	0.515291	0.817482	0.359043	0.463035	0.627878
Cebpz	1.58852	0.0222407	0.189242	1.45434	0.0269627	0.232351	1.57489	0.00302587	0.0259863
Celf1	0.116648	0.865284	0.944976	-0.13979	0.821161	0.948148	0.454306	0.430013	0.602786
Celf2	0.975631	0.217641	0.564222	0.706663	0.311444	0.678135	-0.342973	0.48636	0.648308
Celf4	-0.653713	0.358134	0.68166	-0.145897	0.843841	0.950551	-1.82463	0.00259247	0.0233835
Cenpb	-1.01158	0.134762	0.447338	-0.14303	0.842457	0.95027	-0.441647	0.458137	0.625626
Cenpe	2.86146	0.0147516	0.163913	2.71949	0.00755253	0.1581	2.29476	0.00268295	0.0239477
Cenpf	1.86258	0.0504231	0.26807	1.61711	0.0716402	0.356341	1.13992	0.0863492	0.240743
Cenpl	-1.15205	0.0797983	0.343242	-1.11183	0.0949413	0.41226	-1.92599	0.00354811	0.0290795
Cenpn	0.873228	0.348755	0.674941	1.63719	0.0316986	0.253586	0.870768	0.262103	0.452685
Cenpo	-0.91364	0.214956	0.561299	0.175417	0.778048	0.937314	-0.543886	0.428572	0.601771
Cenpw	2.85751	0.00355798	0.107378	3.22367	0.000175617	0.11887	1.8438	0.0208432	0.0990089
Cep110	0.0505172	0.949998	0.981652	-0.234903	0.746428	0.928736	-0.0469035	0.925963	0.95859
Cep152	-0.226066	0.721911	0.869738	-0.333008	0.659283	0.890416	-0.374226	0.463424	0.628066
Cep164	-0.171785	0.792212	0.909143	-0.550166	0.45223	0.78399	-0.176179	0.759605	0.848346
Cep170	0.897188	0.248935	0.598397	0.377866	0.573017	0.845052	1.07228	0.0754431	0.221349
Cep170b	-0.269641	0.695901	0.856363	-0.756615	0.258913	0.635766	-0.259356	0.604744	0.741994
Cep19	0.96265	0.0996229	0.385116	0.292434	0.660266	0.890416	-0.656242	0.265501	0.456338
Cep250	-0.740236	0.243581	0.591478	-0.518419	0.394423	0.743623	-0.720769	0.129869	0.304461
Cep290	0.777087	0.238866	0.589455	1.04013	0.112364	0.446056	1.2932	0.015164	0.0806749
Cep350	0.61181	0.42519	0.717228	0.241096	0.731133	0.923901	0.120448	0.836012	0.900734
Cep55	2.07016	0.00466053	0.112331	0.848371	0.353219	0.711351	0.934149	0.122798	0.29613
Cep63	0.904979	0.257041	0.603714	1.56335	0.0583707	0.321199	0.628496	0.294682	0.481771
Cep68	-0.508243	0.465188	0.742046	-0.687042	0.316177	0.683509	-1.03927	0.141725	0.319294
Cep78	0.725714	0.374388	0.691479	0.564783	0.483906	0.801036	0.0982389	0.906022	0.946529
Cep85l	-0.592484	0.337573	0.67138	0.486487	0.513906	0.817282	0.377752	0.533235	0.685936
Cep97	-0.743941	0.340626	0.673499	0.226876	0.761118	0.933111	-1.5275	0.0291107	0.124048
Cept1	0.625731	0.390952	0.70256	0.746707	0.382474	0.737034	0.798305	0.195589	0.382649
Cerk	-1.17358	0.144641	0.463603	-0.195583	0.753585	0.930441	-1.4257	0.0238164	0.108088
Cers4	-0.217711	0.734691	0.878203	-0.49122	0.454692	0.785278	-1.04813	0.0779654	0.225373
Cers6	0.478134	0.419105	0.717228	-0.707051	0.377562	0.731817	0.729485	0.16968	0.354276
Ces2g	-0.512105	0.551971	0.778768	-1.27116	0.128002	0.472853	-2.58341	0.00179168	0.0182955
Cfl1	2.88708	0.00494642	0.112331	1.78027	0.0569774	0.31873	3.02652	0.00061759	0.00904598
Cfl2	2.59752	0.0115538	0.1477	1.46167	0.125903	0.469183	1.10714	0.0844171	0.236669
Cflar	-0.0051744	0.995276	0.999653	0.358387	0.64185	0.883113	0.81049	0.231655	0.424841
Cggbp1	0.968271	0.122989	0.427315	0.59264	0.445436	0.780289	0.823552	0.144332	0.322421
Cgnl1	0.00317807	0.994121	0.99925	-0.353155	0.597492	0.857903	0.556014	0.25611	0.446959
Chadl	-0.855998	0.347091	0.673649	-1.60891	0.0450093	0.291025	-1.9333	0.0418563	0.157164
Chchd2	4.28083	0.000831514	0.102938	4.12788	0.00101196	0.122393	4.37084	2.59737e-06	0.000521968
Chchd3	3.18944	0.00115212	0.102938	2.89895	0.00289666	0.122393	2.91016	7.12927e-06	0.000699379
Chd1	0.973918	0.163442	0.489184	1.32473	0.0503483	0.306521	1.69315	0.0136077	0.074472
Chd2	0.523525	0.438187	0.726857	0.92495	0.157607	0.522743	1.42498	0.0231764	0.105757
Chd3	0.421601	0.502727	0.755294	0.529838	0.379604	0.734077	0.0137956	0.9904	0.997548
Chd4	1.30786	0.0905146	0.369069	0.357396	0.682228	0.901866	1.5338	0.0240677	0.108835
Chd5	-1.06819	0.264494	0.608712	-0.872253	0.172766	0.54487	-0.794887	0.293129	0.480309
Chd6	-0.461825	0.451728	0.735889	-0.489481	0.447043	0.781459	-0.279201	0.583584	0.725365
Chd7	-0.915934	0.369909	0.689167	-1.25111	0.0525523	0.30916	-1.32895	0.158033	0.339009
Chd8	0.0409935	0.95319	0.983938	-0.189621	0.769113	0.933946	-0.0189391	0.966558	0.98359
Chd9	0.159778	0.797962	0.912164	0.172408	0.787649	0.940121	-0.347742	0.484877	0.647332
Chek1	1.47595	0.105537	0.395264	1.59245	0.0355317	0.266238	0.999418	0.160729	0.342016
Chic1	0.104181	0.867627	0.94602	-0.64206	0.39158	0.742321	-0.690317	0.258347	0.450115
Chm	1.35027	0.0552044	0.281885	1.14517	0.0731719	0.360407	0.858762	0.219859	0.412615
Chml	-0.507226	0.431689	0.720295	-0.183768	0.762925	0.933111	-0.932087	0.0769299	0.223494
Chmp3	1.32095	0.11709	0.417103	0.771628	0.399939	0.74695	0.598239	0.413707	0.589074
Chmp7	0.604348	0.340248	0.673499	0.521657	0.415628	0.759591	-0.103438	0.857992	0.915192
Chpf	-0.177699	0.815856	0.921714	-0.625059	0.422769	0.762949	-0.251168	0.677309	0.793564
Chpf2	-0.520816	0.425235	0.717228	0.148923	0.829102	0.948805	-0.754972	0.11337	0.283087
Chpt1	0.18657	0.794072	0.909995	0.867473	0.227488	0.603431	0.125295	0.829518	0.89585
Chrna1	-0.677085	0.341836	0.673649	-0.369121	0.558215	0.83739	0.381408	0.595368	0.735355
Chst11	-0.736161	0.276489	0.620958	-0.568975	0.386937	0.740843	-0.650274	0.264949	0.456013
Chst2	-0.207069	0.809488	0.91815	-0.860534	0.178851	0.553292	-1.44228	0.0538181	0.182567
Chsy1	0.539612	0.374359	0.691479	-0.0932178	0.874117	0.962429	0.022774	0.977403	0.989615
Chtf18	-0.0407409	0.961111	0.987246	0.729207	0.349828	0.707542	0.588408	0.417539	0.592241
Chtop	1.20065	0.0471273	0.260858	0.779682	0.166065	0.533553	1.04758	0.0446977	0.163794
Churc1	0.210169	0.764333	0.896523	0.666548	0.375808	0.73109	0.713185	0.261493	0.452685
Ciapin1	-0.488275	0.56095	0.782526	-0.781399	0.260758	0.637038	-0.191014	0.784416	0.865562
Cic	-0.624617	0.309671	0.645623	-0.767144	0.257549	0.634096	-0.708323	0.181339	0.368774
Cinp	-0.553444	0.405688	0.711902	-0.32372	0.680908	0.901181	-0.0954723	0.858199	0.915218
Cir1	0.803763	0.218557	0.56512	1.11888	0.100517	0.423728	0.230353	0.703283	0.811318
Cisd2	1.44045	0.0360459	0.230988	1.47663	0.0289588	0.241553	0.508057	0.412286	0.587668
Cit	-1.35148	0.0409006	0.243336	-0.393237	0.506263	0.814246	-0.637367	0.211631	0.402892
Cited2	3.1922	0.00195407	0.102938	2.33789	0.0184686	0.199525	2.682	0.000272335	0.00520233
Ckap2	3.078	0.00606578	0.117171	2.97507	0.00222879	0.122393	2.37686	0.00238695	0.0221255
Ckap2l	1.91546	0.0154649	0.165466	1.14043	0.0938598	0.410045	0.710092	0.326818	0.510234
Ckap4	2.10784	0.0194881	0.178409	1.16718	0.14984	0.506587	1.66217	0.00504447	0.0369977
Ckap5	1.92803	0.0301368	0.213852	1.24208	0.0544431	0.314032	1.71361	0.011049	0.0653829
Cks2	2.15407	0.0135421	0.159192	0.938378	0.233327	0.610393	0.644074	0.306282	0.490216
Clasp1	0.54488	0.370784	0.689167	0.213074	0.724218	0.920665	0.53326	0.273459	0.463202
Clasrp	0.242519	0.725418	0.87189	-0.439693	0.6316	0.877573	-0.00708749	0.97588	0.988272
Clcn2	0.259253	0.737879	0.880547	-0.486384	0.527003	0.82344	-1.54122	0.0410586	0.155213
Clcn7	0.369051	0.584925	0.797835	0.861126	0.211434	0.586199	0.553429	0.336856	0.517983
Cldn12	-0.0459356	0.959048	0.986111	-0.221738	0.756699	0.931002	-0.569293	0.293239	0.480309
Clec16a	-0.893832	0.203584	0.544624	-0.154095	0.829643	0.948805	-0.331525	0.556812	0.705352
Clic4	1.19873	0.0665297	0.311515	0.741054	0.236413	0.61509	1.68729	0.00387423	0.0307491
Clint1	2.04461	0.0111299	0.145238	2.25609	0.027085	0.232615	2.1245	0.000308949	0.00548628
Clip1	0.699209	0.275078	0.61957	-0.0811071	0.887132	0.967031	0.449578	0.393676	0.571132
Clip2	-0.279925	0.700917	0.858434	0.103326	0.911811	0.974426	-0.62416	0.261852	0.452685
Clk1	1.25968	0.0769663	0.337711	0.529314	0.462681	0.791238	1.32842	0.0279141	0.121001
Clk2	-0.38074	0.570847	0.788111	0.812899	0.361443	0.718955	-0.498507	0.38512	0.563109
Clmp	1.48338	0.0687761	0.316739	1.18778	0.100975	0.423728	1.10881	0.100634	0.262098
Cln8	-0.694218	0.301369	0.642375	-0.449459	0.493962	0.805544	-0.831769	0.142939	0.320592
Clns1a	2.01852	0.0154194	0.165466	2.07002	0.00320195	0.122742	2.11392	0.0022983	0.0215825
Clock	0.316884	0.602297	0.806686	0.272114	0.638598	0.881761	0.553701	0.293251	0.480309
Clp1	-1.42863	0.0848764	0.354758	-2.2198	0.00256297	0.122393	-1.33965	0.076324	0.222937
Clpp	1.63223	0.0521928	0.273999	0.68613	0.495211	0.806169	2.22179	0.00194973	0.0195128
Clptm1	0.0546737	0.948556	0.981253	0.714455	0.433489	0.770922	1.07524	0.0662663	0.205737
Clpx	1.83295	0.022849	0.19113	1.66921	0.0666587	0.341323	0.944464	0.175538	0.361018
Clspn	-0.205373	0.730804	0.875345	-0.126765	0.834651	0.949352	0.192801	0.745724	0.840214
Clstn1	0.724842	0.372721	0.689617	-0.184936	0.831078	0.94894	1.30389	0.0701451	0.213462
Cltc	2.60209	0.0137611	0.159741	1.7067	0.0539444	0.312288	3.01055	0.000427726	0.00690535
Cluh	0.326337	0.605623	0.808355	-0.0261706	0.987901	1	0.865682	0.130825	0.305847
Cmah	-0.847074	0.452124	0.736295	-0.483902	0.584863	0.848804	-1.39978	0.149481	0.329362
Cmas	0.547843	0.438227	0.726857	0.832658	0.19382	0.573133	0.00373513	1	1
Cmpk1	2.1273	0.0439243	0.252708	1.65824	0.0446785	0.29043	0.0075988	0.994477	1
Cmtm4	0.623935	0.418876	0.717228	0.440412	0.523328	0.821625	0.346515	0.534441	0.686434
Cmtm6	0.414524	0.561447	0.782526	0.341688	0.637892	0.881665	-0.0129547	1	1
Cnbp	2.75056	0.00886066	0.133323	2.54881	0.026436	0.231104	2.93653	0.000144918	0.00361691
Cnep1r1	2.18537	0.0141704	0.161671	1.43242	0.0667823	0.341323	1.10817	0.0705129	0.213574
Cnih	1.83594	0.0163089	0.167177	1.61624	0.0125175	0.179679	2.34097	0.000193334	0.00424153
Cnih4	1.73327	0.0264436	0.204681	1.53703	0.0524244	0.309088	1.44673	0.0165376	0.085743
Cnn2	1.28951	0.118501	0.418956	1.42769	0.0616746	0.328234	0.907642	0.221041	0.413444
Cnn3	2.25643	0.0189104	0.176591	1.13987	0.08454	0.387913	1.19349	0.0384454	0.148691
Cnnm2	-0.592461	0.447127	0.732814	-1.02624	0.184541	0.562649	-1.11916	0.0898052	0.245875
Cnnm4	-0.770729	0.291516	0.63396	-0.507189	0.466958	0.79225	-0.50598	0.374317	0.554249
Cnot1	1.73601	0.0594862	0.292542	1.3931	0.133508	0.484197	2.28583	0.00158982	0.016714
Cnot10	1.66259	0.0166055	0.167851	1.24368	0.0581372	0.321199	1.67483	0.00936994	0.0587698
Cnot11	0.0147602	1	1	0.43357	0.468482	0.792348	0.278972	0.600001	0.739006
Cnot2	1.56074	0.0404127	0.242573	1.84703	0.0315328	0.253473	1.2968	0.0130931	0.0726599
Cnot4	0.0700885	0.908933	0.963669	0.600905	0.362873	0.718955	0.680325	0.182147	0.369591
Cnot7	1.98993	0.00515362	0.112331	1.02375	0.238673	0.616315	1.40721	0.0453443	0.165297
Cnppd1	-0.476344	0.563528	0.783389	-0.821699	0.249837	0.627904	-0.540931	0.349279	0.529664
Cnst	-0.844909	0.25274	0.600511	-0.571716	0.33984	0.700757	-0.510725	0.320461	0.50407
Cntln	0.756852	0.33888	0.673471	0.500586	0.497465	0.806797	-0.131743	0.790563	0.869199
Cntrob	-1.046	0.101427	0.388095	-0.866968	0.224526	0.599715	-0.856101	0.269904	0.460677
Coa5	0.550222	0.393577	0.703752	-0.22543	0.796934	0.942036	0.88717	0.148172	0.327514
Cobll1	1.01752	0.139426	0.454973	1.07438	0.174772	0.54759	2.03456	0.00191938	0.0193634
Cog3	0.732382	0.370758	0.689167	1.07905	0.268688	0.64318	0.200495	0.765514	0.853143
Col11a1	0.629291	0.393993	0.703752	0.183236	0.84071	0.949958	-0.60384	0.2936	0.480628
Col12a1	-0.417404	0.47546	0.744885	-0.147586	0.822936	0.948349	-0.0792352	0.863801	0.918462
Col18a1	-0.400728	0.696759	0.856432	-0.675203	0.321166	0.687669	-1.12349	0.228785	0.421811
Col1a1	4.28381	0.00214645	0.102938	3.90078	0.00082571	0.121749	3.87441	4.91818e-05	0.00197671
Col1a2	3.90725	0.00484359	0.112331	2.88848	0.0147855	0.187445	2.52652	0.00891489	0.0569103
Col27a1	-1.35885	0.0972104	0.381253	-1.1789	0.0759759	0.369503	-1.51324	0.0103829	0.0628476
Col3a1	3.3759	0.010003	0.138774	2.52047	0.0187766	0.200284	1.67959	0.0312297	0.129883
Col4a1	1.0051	0.16761	0.495337	0.861499	0.19821	0.57401	1.34877	0.0543134	0.183111
Col4a2	-0.0696627	0.919778	0.968756	-0.190673	0.754131	0.930441	0.745076	0.210041	0.400627
Col4a3	-0.601947	0.540555	0.774159	-0.590969	0.389377	0.74184	-1.21858	0.222003	0.414728
Col4a3bp	0.563764	0.385168	0.697077	-0.0365194	0.959218	0.990157	-0.217746	0.671069	0.789529
Col5a1	0.3761	0.527009	0.766757	0.0363684	0.9602	0.990157	0.550325	0.321123	0.504822
Col5a2	2.44149	0.0321612	0.219108	2.43828	0.0157177	0.192419	1.57617	0.0227182	0.104616
Col6a2	1.18931	0.129721	0.437981	0.259746	0.712493	0.917394	1.57248	0.0185474	0.0922595
Col6a3	0.96473	0.233427	0.584907	1.07318	0.193544	0.572991	2.05568	0.00420591	0.0325099
Col8a1	1.49573	0.0644723	0.305967	0.985886	0.120335	0.460093	0.630058	0.218914	0.411456
Colec12	-0.0644639	0.937235	0.976294	-0.133665	0.857309	0.955814	-0.864779	0.213977	0.405515
Commd2	0.271806	0.721173	0.869075	-0.873066	0.319475	0.686336	-0.512386	0.500561	0.659874
Commd3	3.92679	0.000534222	0.102938	2.58526	0.0041566	0.133226	3.1335	4.97127e-05	0.00198219
Commd8	0.595059	0.387204	0.699574	0.91435	0.190321	0.568137	0.22034	0.670321	0.789241
Comt	0.484268	0.549597	0.776965	0.90983	0.222613	0.598078	1.30972	0.0627612	0.197936
Copb2	4.17432	0.00116013	0.102938	3.56929	0.000563247	0.11887	4.25368	2.02166e-06	0.000483657
Coq10b	1.40034	0.0730581	0.327133	1.63868	0.0524475	0.309088	1.72935	0.00920512	0.0580257
Coq3	-0.639429	0.365259	0.687804	-0.424236	0.544906	0.831089	-1.50376	0.0200021	0.0968814
Coq4	0.130048	0.85164	0.939209	-0.629709	0.394606	0.743623	0.00389093	0.985767	0.994476
Coro1c	0.457436	0.485448	0.747488	-0.751437	0.390586	0.742321	0.537418	0.310547	0.493575
Cox15	0.51723	0.427957	0.717713	0.660782	0.363733	0.7193	-0.303428	0.616013	0.750452
Cox5b	2.06776	0.0143774	0.161671	0.923828	0.257429	0.634096	2.28168	0.00386022	0.0306863
Cox7c	4.00277	0.00348074	0.107378	3.61322	0.00153607	0.122393	2.88639	0.00157179	0.0165896
Cp	0.161143	0.780803	0.90386	0.886166	0.133635	0.484197	-0.363682	0.490731	0.652059
Cpd	0.358841	0.596911	0.805781	0.087686	0.896622	0.971034	0.393493	0.461073	0.62691
Cpe	2.97099	0.00735351	0.127834	2.10818	0.0217827	0.213743	2.81212	0.000309155	0.00548628
Cpeb2	-0.704841	0.270689	0.61397	-0.171682	0.797298	0.942057	-0.172163	0.728365	0.827523
Cped1	2.09202	0.0155021	0.165466	2.06309	0.0120898	0.178542	0.601731	0.309936	0.493311
Cplx2	-0.443273	0.548408	0.77655	-0.30656	0.647488	0.887001	-0.506516	0.476595	0.640046
Cpm	-0.674004	0.460062	0.741747	-0.936563	0.275884	0.646172	-0.957932	0.323602	0.507105
Cpne8	-1.20861	0.18923	0.528866	-0.982587	0.194622	0.57401	-1.44332	0.0872085	0.241397
Cpox	0.438032	0.483588	0.746863	0.919968	0.192065	0.570628	0.882742	0.0829185	0.233641
Cpped1	0.1052	0.870425	0.946679	0.0852085	0.926233	0.978426	-0.241958	0.648207	0.773635
Cpq	0.9272	0.258238	0.603714	2.10858	0.0356114	0.266238	0.955643	0.135271	0.310491
Cpsf1	-0.163883	0.828665	0.9266	-0.664236	0.388921	0.741251	0.620761	0.372867	0.55308
Cpsf2	1.08907	0.0876276	0.362936	0.43026	0.518943	0.820122	1.1462	0.0505681	0.17634
Cpsf6	0.984664	0.114184	0.412491	0.669237	0.269869	0.64318	0.490195	0.327316	0.510694
Cpsf7	-0.259478	0.68707	0.854747	-0.590874	0.340226	0.700757	0.0732778	0.897961	0.94065
Cpt2	0.221717	0.722949	0.87038	-0.362254	0.615884	0.868182	-1.0302	0.0706945	0.213829
Cr1l	0.654038	0.4233	0.717228	0.189843	0.841148	0.949958	2.00622	0.00178717	0.0182867
Cramp1l	-0.514356	0.424555	0.717228	-0.486847	0.443523	0.777991	-0.503291	0.329108	0.512376
Crbn	1.69515	0.0405923	0.242846	1.74976	0.0211619	0.211366	1.61521	0.00471227	0.035207
Creb1	-0.0181052	0.98009	0.995144	-0.480807	0.555431	0.835474	-0.187447	0.70124	0.810207
Creb3l2	-0.416106	0.495733	0.751783	-0.66842	0.269638	0.64318	-0.736821	0.161553	0.3427
Crebbp	0.936885	0.254605	0.601072	0.472143	0.483104	0.801036	1.4968	0.0362598	0.142878
Crebrf	-0.387711	0.530845	0.769431	-0.028113	0.977463	0.997265	-0.911234	0.147235	0.326582
Crebzf	-0.244755	0.683642	0.853745	-0.189245	0.766028	0.933111	-0.781735	0.127747	0.302593
Creg1	1.50168	0.0284875	0.207208	1.44422	0.0438522	0.289051	1.16733	0.0399087	0.152472
Crnkl1	0.487778	0.498618	0.753267	0.512844	0.422347	0.762949	0.323063	0.618518	0.752041
Crocc	-0.916977	0.264748	0.608716	-0.146144	0.862669	0.958723	-1.52071	0.030762	0.128476
Crtc2	-1.4509	0.0930229	0.374304	-0.0674617	0.956538	0.990157	-0.720494	0.218456	0.410904
Crtc3	-0.441604	0.530975	0.769431	-0.229822	0.752336	0.930441	-0.0912133	0.895459	0.939204
Cry1	-0.792185	0.258561	0.603714	0.132436	0.85405	0.955779	0.430047	0.509407	0.667343
Cry2	-0.152245	0.876955	0.948442	-0.45598	0.518327	0.820083	-0.19971	0.778618	0.860867
Crybg3	-1.32678	0.037603	0.236147	-0.480716	0.547694	0.831638	-0.462807	0.471684	0.636001
Csda	3.7275	0.0015736	0.102938	3.24521	0.00583606	0.149508	4.06536	2.6279e-05	0.00141963
Csde1	3.04477	0.0111999	0.145773	2.9745	0.00420412	0.13368	3.0746	0.000169111	0.0039888
Csf1	1.2016	0.127407	0.434551	1.10156	0.158019	0.522743	2.4995	0.00201763	0.0198161
Csgalnact1	0.176472	0.792243	0.909143	0.331578	0.668498	0.896087	-0.359796	0.63126	0.759993
Csgalnact2	1.01202	0.145016	0.464347	0.746209	0.233488	0.610393	0.312742	0.556207	0.70494
Csnk1a1	2.40979	0.0222969	0.189242	2.59029	0.00154233	0.122393	2.34306	0.000170582	0.00400469
Csnk1d	0.506237	0.455323	0.738812	-0.200949	0.772643	0.935224	0.879569	0.19096	0.379087
Csnk1g1	-0.194508	0.773485	0.900259	-0.139251	0.858439	0.956245	0.0483384	0.931427	0.962224
Csnk1g2	0.486328	0.480454	0.746151	0.53525	0.43376	0.770922	0.567539	0.39929	0.574959
Csnk1g3	1.41709	0.0380372	0.237685	2.18338	0.0147113	0.187445	1.60652	0.00540366	0.038841
Csnk2a1	0.987647	0.198154	0.537864	0.856927	0.221631	0.596451	1.00149	0.113757	0.283772
Csnk2a2	0.477236	0.520325	0.764584	0.0481661	0.969898	0.993804	1.5835	0.00680836	0.0464745
Cspg4	-0.677854	0.431221	0.719753	-0.574598	0.405633	0.751438	-0.791057	0.192012	0.379283
Cspp1	0.478109	0.416036	0.716937	1.02851	0.0804279	0.380174	-0.366161	0.544761	0.696407
Csprs	-0.876941	0.448803	0.733742	-0.65685	0.446281	0.781225	-1.14464	0.263554	0.454392
Csrnp2	-1.51135	0.0134578	0.159192	-1.5355	0.0184269	0.199525	-1.39618	0.0062355	0.0435631
Csrnp3	-1.10626	0.27492	0.61957	-0.853037	0.355328	0.712785	-1.39381	0.122953	0.296267
Csrp2bp	-0.881038	0.252704	0.600511	-1.05003	0.187342	0.56529	-1.17761	0.0549916	0.184554
Cst6	-0.713146	0.506399	0.756101	-0.751961	0.262476	0.638895	-1.50321	0.0810188	0.230486
Cstf2t	0.725816	0.21379	0.559416	0.678468	0.380586	0.734602	0.388935	0.430785	0.603486
Ctbp2	-0.0410107	0.94744	0.981155	-0.616434	0.384902	0.73801	-0.203353	0.709325	0.815853
Ctcfl	-0.609921	0.608551	0.80904	-0.481845	0.570477	0.844947	-1.51053	0.113328	0.283087
Ctdsp2	0.174037	0.783375	0.904233	-0.531929	0.393637	0.743623	-0.825529	0.105194	0.268136
Ctdspl	-0.261673	0.700197	0.858416	0.346465	0.635434	0.880026	-0.472148	0.474652	0.638461
Ctdspl2	1.24956	0.0686929	0.316739	1.0459	0.199413	0.57401	1.78082	0.0013246	0.0146905
Ctgf	0.1601	0.841124	0.9345	0.250239	0.74281	0.927218	0.4598	0.488584	0.650385
Cthrc1	0.810586	0.258895	0.603714	0.338888	0.606306	0.862424	-1.18836	0.122794	0.29613
Ctif	0.251205	0.744177	0.88512	-0.503959	0.487465	0.801665	-0.717006	0.368363	0.547855
Ctla2a	0.438256	0.581703	0.796298	0.220044	0.767292	0.933111	-0.129366	0.842509	0.904824
Ctnnbl1	-0.231111	0.728295	0.874302	-0.0991739	0.927586	0.979032	0.503808	0.437463	0.609488
Ctnnd1	0.906615	0.195652	0.535829	-0.0482468	0.944038	0.984249	0.601235	0.229899	0.422926
Ctps	2.681	0.00496445	0.112331	2.1328	0.00402517	0.133226	2.7584	0.00047294	0.00740154
Ctsb	2.75334	0.0110463	0.144896	2.54279	0.00836558	0.159504	2.76888	0.00030307	0.0054538
Ctsl	3.84106	0.0094244	0.135668	3.62671	0.00839969	0.159504	3.3025	0.000422948	0.00687668
Ctso	-0.223968	0.733935	0.877926	-0.293513	0.72484	0.920757	-0.675992	0.377356	0.556555
Cttn	2.60911	0.00334062	0.107378	1.33485	0.149721	0.506587	2.84375	0.000336882	0.00585638
Cttnbp2nl	0.398425	0.50906	0.757199	0.297674	0.660368	0.890416	1.07616	0.0506985	0.176636
Cubn	-1.36511	0.0425756	0.24816	-1.06189	0.171714	0.543941	-1.59038	0.0497766	0.175124
Cul3	2.76185	0.00280416	0.107378	2.42656	0.00930946	0.167038	3.03962	0.000111241	0.0030084
Cul4b	2.59285	0.0212866	0.186638	2.23043	0.0177121	0.198186	2.00881	0.0166573	0.0862745
Cux1	0.0587095	0.931443	0.974911	-0.235245	0.713546	0.917601	-0.0669951	0.894952	0.939031
Cwc22	-0.621025	0.416692	0.716937	0.0103742	0.990307	1	-0.458643	0.46862	0.632889
Cwc25	-0.46956	0.443729	0.729831	-0.470748	0.425778	0.765041	-0.567454	0.274367	0.463714
Cxcl12	0.290557	0.62141	0.817055	-0.683598	0.225537	0.600794	-1.03977	0.0959243	0.255071
Cxcr2	-0.64537	0.321961	0.657838	0.481359	0.514057	0.817282	0.777936	0.332857	0.514889
Cxcr7	0.273096	0.680915	0.852246	-0.434028	0.610637	0.865061	0.130794	0.828935	0.895413
Cyb561d1	-0.738736	0.415559	0.716937	-0.737464	0.22981	0.605809	-1.20992	0.177589	0.363921
Cyb5b	1.79907	0.0414468	0.244975	1.67828	0.0415475	0.283607	1.01644	0.0716664	0.215551
Cyb5r3	1.84868	0.108476	0.400138	2.17266	0.0471138	0.296245	2.11408	0.0089822	0.0571621
Cybrd1	-0.873794	0.447595	0.732877	-0.745682	0.375829	0.73109	-1.47504	0.146863	0.32619
Cycs	1.92363	0.0549147	0.281809	2.03106	0.0357971	0.266669	1.61626	0.0213167	0.100138
Cyhr1	-0.428764	0.485711	0.747534	-0.340211	0.610961	0.865061	-0.329462	0.549151	0.699349
Cyld	-0.00621328	0.994019	0.99925	-0.0746764	0.915592	0.97451	-1.01179	0.0476598	0.170301
Cyp1b1	0.321001	0.687166	0.854747	-0.164336	0.81483	0.946396	-0.97274	0.120251	0.292563
Cyp26b1	-0.557255	0.50719	0.756101	-1.18144	0.0788619	0.376707	-1.07725	0.0351924	0.140546
Cyp2c55	-0.123866	0.850393	0.93857	0.297497	0.674205	0.898954	-0.0330306	0.967917	0.984376
Cyp2e1	-0.410155	0.628044	0.820804	-0.0196002	1	1	-0.547891	0.454657	0.622907
Cyp2j6	1.20244	0.100825	0.387921	1.40373	0.117529	0.454572	0.814424	0.199033	0.387273
Cyp4f16	-0.655217	0.428356	0.718071	0.207039	0.793669	0.941884	-1.10822	0.121025	0.293875
Cyp4v3	0.230511	0.735415	0.87886	0.802218	0.271902	0.643552	-0.00511862	0.988793	0.996729
Cyp51	2.26822	0.0205099	0.183023	1.65391	0.0940991	0.410733	2.79863	0.000219646	0.00453912
Cyr61	0.443332	0.6124	0.810937	-0.226439	0.79151	0.941418	1.69837	0.0170844	0.0878528
Cyth1	-0.0107539	1	1	1.12225	0.10382	0.42894	0.240933	0.716633	0.820689
Cyth3	0.913082	0.202378	0.542634	0.790783	0.228078	0.604039	0.481643	0.331769	0.51413
Cytip	-1.28194	0.041257	0.24414	-1.14685	0.0607806	0.32705	-0.955692	0.230681	0.423928
D030025P21Rik	-1.42405	0.0864746	0.359345	0.149494	0.821985	0.948349	-0.929327	0.241103	0.434159
D10Wsu102e	-0.0476315	0.931255	0.974911	0.625388	0.294969	0.664837	0.424164	0.492387	0.653632
D14Abb1e	-0.0389334	0.961627	0.987277	-0.3563	0.570914	0.844947	-0.622092	0.240434	0.433893
D15Ertd621e	1.35138	0.0479429	0.26238	1.08033	0.137013	0.488907	1.6012	0.00540403	0.038841
D16Ertd472e	-0.463662	0.493189	0.751041	-0.111509	0.873348	0.962429	-0.0914153	0.874265	0.925795
D17H6S53E	-0.845646	0.342594	0.673649	-1.87121	0.0253727	0.227629	-0.563845	0.490909	0.652122
D17Wsu92e	-0.584423	0.410655	0.714489	-0.0118714	1	1	-0.409834	0.433941	0.605588
D19Bwg1357e	1.86892	0.0265817	0.204681	1.4244	0.107752	0.438693	1.80281	0.00320925	0.0270525
D1Ertd622e	0.42532	0.480379	0.746151	1.30031	0.0337363	0.259956	-0.575555	0.331599	0.51413
D2hgdh	-1.03859	0.2605	0.605344	0.815756	0.328924	0.692507	-0.5586	0.522547	0.678365
D3Ertd254e	-0.462888	0.421983	0.717228	0.431415	0.473126	0.795497	-0.35529	0.514892	0.672599
D4Wsu53e	2.63146	0.00262684	0.107378	1.68937	0.0208387	0.211076	0.730893	0.284921	0.4735
D5Ertd579e	-0.152504	0.803302	0.915353	-0.262013	0.674727	0.898954	-0.115651	0.821382	0.890348
D630037F22Rik	-0.00568209	1	1	0.163165	0.822948	0.948349	-0.359907	0.626505	0.756807
D630045J12Rik	-1.15386	0.12765	0.434788	-0.89764	0.226658	0.602503	-0.80581	0.210116	0.400627
D830031N03Rik	0.326199	0.677811	0.849844	0.452347	0.53655	0.828315	-0.0619969	0.915508	0.951886
D8Ertd82e	-0.678235	0.458542	0.740983	0.202564	0.799849	0.94312	-1.09098	0.110741	0.278322
D930015E06Rik	-0.509882	0.527984	0.767533	-0.188501	0.841802	0.949958	-0.298667	0.683874	0.797536
Daam1	-0.225174	0.737406	0.880362	-0.147653	0.827497	0.948805	-0.278772	0.676214	0.79302
Daam2	-0.427509	0.502079	0.755069	-0.399016	0.600625	0.859364	-0.903851	0.20569	0.395631
Dab2ip	-0.223409	0.763066	0.895993	-0.0995333	0.873647	0.962429	-0.240518	0.691154	0.802486
Dad1	-0.582513	0.390251	0.70256	-1.05373	0.14061	0.495737	-0.79711	0.20515	0.394894
Dag1	1.57002	0.060325	0.294075	0.899884	0.142179	0.4972	0.281883	0.572813	0.716766
Dagla	-0.641063	0.401447	0.708419	0.34512	0.624583	0.874312	-0.679474	0.332638	0.514841
Dap	3.2913	0.00015099	0.102938	2.0293	0.00268199	0.122393	2.81181	0.000353327	0.00595785
Dapk1	-0.8644	0.355786	0.679904	0.0541206	0.93112	0.97988	-1.28808	0.132229	0.30727
Dars2	-0.687381	0.286053	0.628391	-0.703312	0.288563	0.659269	-1.2241	0.0522396	0.179885
Daxx	-0.348802	0.589291	0.799554	-0.893818	0.288486	0.659269	-0.868403	0.161088	0.342591
Dbf4	2.68276	0.00049943	0.102938	1.56964	0.0121358	0.178542	1.91348	0.00403682	0.0315903
Dbnl	0.830827	0.261509	0.606471	0.489437	0.457883	0.787749	0.899679	0.157783	0.338616
Dcaf10	-1.49397	0.0313302	0.217067	-0.697979	0.24196	0.621158	-0.637466	0.240869	0.433893
Dcaf17	-0.800551	0.263072	0.607552	-0.248274	0.733697	0.924397	-0.300717	0.636718	0.764183
Dcaf4	0.643735	0.391177	0.70256	1.72594	0.0289886	0.241553	1.25463	0.0799961	0.228742
Dcaf5	-0.591765	0.315653	0.651759	0.0626118	0.919751	0.975682	-0.674365	0.244135	0.436024
Dcaf6	0.218657	0.789298	0.907469	0.0988324	0.905221	0.973006	-0.52194	0.474042	0.637811
Dcaf7	-0.0914719	0.897678	0.958196	0.177748	0.796589	0.941884	-0.395615	0.445424	0.615799
Dcbld2	1.33347	0.0528192	0.275624	1.15793	0.102607	0.424976	1.7644	0.0130097	0.0724618
Dcdc2c	-1.16212	0.319327	0.656155	-0.954266	0.271328	0.643552	-1.40951	0.177306	0.36374
Dclk1	0.166578	0.827478	0.926586	-0.744078	0.285811	0.657771	-0.854275	0.123362	0.296968
Dclk2	-1.01934	0.151001	0.470999	-0.851183	0.145416	0.500223	-0.941746	0.102095	0.263852
Dclre1a	0.531372	0.358545	0.68166	0.893558	0.167315	0.535433	-0.215219	0.702726	0.811204
Dclre1b	-0.203726	0.807691	0.917329	-0.607971	0.326422	0.691031	-1.46027	0.0456807	0.165944
Dclre1c	0.0259705	0.974805	0.993315	0.172627	0.820448	0.948112	0.65068	0.35459	0.533851
Dcp1a	0.73392	0.212813	0.558012	0.241516	0.711458	0.916974	-0.00847486	0.994312	1
Dcp2	-0.531669	0.387244	0.699574	-0.0533109	0.935117	0.981805	0.0298107	0.95849	0.97895
Dctn1	0.0185572	1	1	0.620249	0.37401	0.73109	0.523048	0.404933	0.580113
Dctn4	1.47209	0.0370431	0.234388	1.16344	0.158418	0.522925	1.98239	0.00213302	0.0205293
Dcun1d1	0.223252	0.716039	0.866212	0.601849	0.311023	0.678135	0.0961431	0.869485	0.923334
Dcun1d2	0.307966	0.682455	0.853177	1.04124	0.158155	0.522743	-0.367007	0.669282	0.788388
Dcun1d3	0.45862	0.518607	0.763399	0.228358	0.72713	0.922644	-0.235636	0.710519	0.816846
Dcun1d4	-0.470563	0.450688	0.735685	-0.703997	0.292956	0.66322	-0.906684	0.128961	0.303741
Ddb1	1.8056	0.0328144	0.220696	-0.00684729	0.991622	1	3.22949	0.00139527	0.0152449
Ddhd2	-0.296988	0.675015	0.848667	0.555913	0.387585	0.741135	0.582262	0.286955	0.475326
Ddr1	-0.800358	0.269025	0.612588	-0.667844	0.38979	0.742063	-0.8119	0.326013	0.509452
Ddr2	1.47454	0.0742806	0.331132	0.733431	0.284796	0.657544	2.02544	0.00425171	0.0327203
Ddx17	0.885881	0.220819	0.567892	0.261631	0.692755	0.905411	0.382893	0.452717	0.621881
Ddx18	1.82043	0.0582532	0.289194	1.41603	0.106585	0.435517	2.04932	0.00868376	0.055718
Ddx19b	-1.17577	0.160543	0.48559	-0.755667	0.308735	0.676765	-1.48741	0.0581185	0.19018
Ddx21	2.23084	0.0185441	0.175294	2.37641	0.012978	0.180114	2.77313	0.000347285	0.00593234
Ddx23	0.704215	0.292672	0.634881	0.459417	0.466889	0.79225	0.822465	0.270342	0.460875
Ddx24	1.32383	0.0648291	0.306976	0.787732	0.258745	0.635666	1.90685	0.0118456	0.0682613
Ddx28	-1.4185	0.0484194	0.263552	-0.988382	0.174832	0.54759	-0.785881	0.334383	0.515803
Ddx31	-0.328805	0.616162	0.813281	0.319635	0.618042	0.869414	0.233758	0.702865	0.811204
Ddx3x	2.72974	0.00835949	0.129745	1.77379	0.0615889	0.328126	3.02449	0.000245456	0.00477973
Ddx42	0.680564	0.292925	0.635118	0.827588	0.144239	0.500223	1.23852	0.0271278	0.118622
Ddx47	0.841851	0.283636	0.626254	-0.0104615	1	1	0.834823	0.306073	0.490216
Ddx5	3.62742	0.00385839	0.107378	3.26524	0.00408475	0.133226	3.05582	0.000229194	0.00461608
Ddx50	1.06734	0.085844	0.357909	1.10147	0.145358	0.500223	0.865351	0.0958487	0.255071
Ddx55	-0.0156555	0.978546	0.99416	0.656987	0.422066	0.762949	-0.137923	0.875627	0.926917
Ddx6	1.30431	0.10849	0.400138	0.763275	0.24678	0.627141	1.39877	0.041599	0.156667
Degs1	2.25573	0.0137005	0.159741	1.47798	0.0312949	0.252477	1.95061	0.0107407	0.0643929
Dek	3.31925	0.00629952	0.119882	3.13885	0.0160717	0.192795	3.05332	0.000187277	0.00420035
Dennd1a	-0.329444	0.560044	0.782442	-0.608928	0.280413	0.650529	-0.611528	0.222058	0.414728
Dennd1b	-0.372631	0.535979	0.771237	-0.232675	0.721882	0.919984	-0.423455	0.418789	0.593343
Dennd2a	-0.739207	0.223265	0.569837	-0.247287	0.730054	0.923352	-0.974329	0.0691005	0.21104
Dennd2c	-1.01265	0.197224	0.537326	-0.33809	0.624067	0.873833	-0.762192	0.213143	0.404827
Dennd4c	0.551274	0.475204	0.744885	0.892961	0.218329	0.592104	0.542639	0.35652	0.535472
Dennd5a	0.736388	0.277372	0.620978	-0.012848	0.984338	1	0.745665	0.215256	0.406865
Dennd5b	-0.479965	0.520946	0.764651	0.476139	0.540747	0.828962	0.421435	0.555739	0.704579
Denr	2.88478	0.0144495	0.161671	2.38322	0.0320313	0.254974	3.1946	0.00105841	0.0127824
Dera	0.553182	0.447172	0.732814	0.334168	0.662788	0.891172	-0.750848	0.272453	0.462277
Derl1	1.01459	0.121418	0.424838	0.915626	0.152227	0.510538	1.12974	0.0292554	0.124453
Derl2	-0.147606	0.838353	0.932074	-0.294335	0.699904	0.908866	-0.324118	0.605128	0.742011
Desi2	0.0324914	0.974704	0.993315	0.476327	0.49585	0.806719	-0.0959458	0.840776	0.903735
Dfna5	-1.63567	0.0667597	0.311515	-1.49387	0.0941932	0.410787	-1.83561	0.0492245	0.173913
Dgcr8	-0.538893	0.403769	0.710769	-0.764182	0.268653	0.64318	-0.884248	0.151662	0.332277
Dgkd	-0.409415	0.54548	0.77578	0.112216	0.870202	0.961661	0.458691	0.452862	0.621881
Dgkz	-0.118671	0.882306	0.950816	-0.32132	0.686412	0.903755	-0.470217	0.415413	0.590225
Dhcr24	1.73283	0.0452235	0.255557	1.10739	0.145285	0.500223	1.54588	0.0183677	0.0917289
Dhfr	1.09057	0.0908424	0.369069	0.98235	0.123885	0.464348	1.68901	0.00513423	0.0375464
Dhps	1.05479	0.224321	0.571212	-0.256416	0.750896	0.930441	0.708605	0.404105	0.579402
Dhx15	2.31018	0.00463647	0.112331	1.46435	0.0910026	0.405093	2.83019	0.000243351	0.00477575
Dhx30	0.379102	0.567292	0.785256	-0.711071	0.363945	0.7193	-0.317286	0.604938	0.741994
Dhx33	0.218367	0.705165	0.860476	0.0719307	0.916158	0.97451	0.0285738	0.969146	0.984828
Dhx34	-0.770039	0.417968	0.716994	0.185913	0.81872	0.947098	-1.17773	0.156983	0.337043
Dhx36	2.02685	0.0158377	0.166643	2.22318	0.0153529	0.189983	1.88298	0.00299184	0.0258264
Dhx37	-0.921264	0.305958	0.644231	-0.584103	0.471053	0.794417	-1.22098	0.0591656	0.191402
Dhx40	0.916828	0.142276	0.45997	-0.598008	0.430802	0.770036	0.569019	0.334389	0.515803
Dhx8	-0.458299	0.493238	0.751041	-1.16334	0.112579	0.446056	-0.13493	0.77537	0.859019
Dhx9	2.93638	0.00967661	0.13808	2.79966	0.0419081	0.283755	2.53813	0.000579472	0.00858781
Diap1	-0.0564546	0.942847	0.978489	0.244547	0.725306	0.921035	-0.187631	0.759035	0.848175
Diap2	-0.588821	0.398826	0.706523	-0.31435	0.647951	0.887001	0.414804	0.460599	0.626761
Dicer1	0.768378	0.243585	0.591478	1.11319	0.13358	0.484197	0.79448	0.140175	0.317637
Dido1	-0.448741	0.547143	0.77578	-0.43676	0.52809	0.82344	-0.345216	0.557926	0.706228
Dip2a	0.645411	0.311376	0.647228	0.285389	0.657171	0.890416	0.0698881	0.908131	0.94814
Dip2b	0.332267	0.555983	0.779885	0.464873	0.449715	0.783502	0.348055	0.461816	0.62764
Dirc2	0.200438	0.752739	0.889636	0.631836	0.275112	0.645711	-0.0513376	0.952898	0.97542
Dis3	2.22744	0.00665422	0.122487	1.35427	0.144688	0.500223	3.01512	5.93695e-05	0.0021407
Dis3l	-0.350679	0.601518	0.806686	0.16099	0.813225	0.945857	-0.359449	0.547725	0.698319
Disp1	-0.0499479	0.959111	0.986111	-0.234947	0.735807	0.925088	-0.1231	0.860845	0.916268
Dixdc1	-0.733117	0.237897	0.589455	-1.14628	0.0761217	0.369503	-1.49094	0.0178719	0.090604
Dkc1	3.08904	0.00909211	0.133614	2.76965	0.00203712	0.122393	2.36815	0.00016074	0.00386533
Dkk2	-0.604909	0.426738	0.717355	-1.31533	0.0510396	0.307577	-1.28963	0.0834649	0.234917
Dlat	1.17625	0.102726	0.388918	1.46487	0.194914	0.57401	1.02551	0.0694472	0.211584
Dlc1	-1.14534	0.076765	0.337405	-0.910203	0.298382	0.667589	-1.17544	0.017169	0.0881976
Dlg1	0.677074	0.28045	0.624271	0.742112	0.20668	0.581388	1.2058	0.0360401	0.142564
Dlg3	0.629691	0.384589	0.697033	-0.209227	0.784474	0.939947	0.337541	0.595787	0.735619
Dlg5	-0.607496	0.350206	0.675406	-1.07663	0.120658	0.460978	0.680218	0.303996	0.487791
Dlgap4	-0.943502	0.222063	0.568915	-0.936069	0.145178	0.500223	-1.40611	0.0161495	0.0839906
Dlgap5	1.07355	0.0723393	0.326403	0.433637	0.48353	0.801036	0.320319	0.572441	0.716666
Dlk1	2.68001	0.0109627	0.144896	2.22325	0.0215031	0.212871	2.11732	0.00402547	0.0315507
Dlx1	-0.29972	0.709493	0.863095	-0.111896	0.906246	0.973628	-2.10204	0.00258944	0.0233835
Dmrta2	-0.967165	0.314844	0.650968	0.0589358	0.938747	0.98317	-0.443948	0.655449	0.779218
Dmwd	-0.530534	0.545162	0.77578	-0.178382	0.825105	0.948587	-0.351203	0.57424	0.717667
Dmxl1	0.0694394	0.935514	0.975913	0.527785	0.420447	0.762572	0.64185	0.245677	0.437822
Dnahc11	-0.500269	0.588905	0.799554	-0.274279	0.727331	0.922644	-0.94576	0.245315	0.437508
Dnahc17	-0.739981	0.464667	0.742046	-0.102854	0.900233	0.97243	-1.13597	0.231965	0.425015
Dnahc8	-1.26539	0.187241	0.5265	-1.20215	0.0522591	0.309088	-1.77446	0.0672548	0.20742
Dnaja1	1.81063	0.0847183	0.354392	3.30718	0.00351209	0.129741	3.7862	6.11206e-06	0.00065334
Dnaja3	1.06409	0.228496	0.578029	0.739721	0.3826	0.737034	0.494169	0.4468	0.616683
Dnajb1	-0.0141182	1	1	0.822663	0.189394	0.567484	3.23649	0.000166268	0.00394025
Dnajb11	1.87903	0.0208832	0.185293	1.44334	0.0563094	0.317637	1.95607	0.00395661	0.0311568
Dnajb12	1.42988	0.038496	0.238681	1.37285	0.0478676	0.299092	2.03758	0.00719603	0.0486715
Dnajb14	-1.17658	0.0959276	0.379913	-0.220164	0.849737	0.9539	-1.03262	0.119976	0.292177
Dnajb2	-0.0747758	0.945337	0.979454	-1.27866	0.0751396	0.367275	0.0368899	0.953545	0.975485
Dnajb6	0.269005	0.724819	0.871689	-0.00692782	0.992069	1	0.70087	0.256347	0.447184
Dnajb9	1.45426	0.0443483	0.253126	2.57525	0.00172246	0.122393	3.07241	1.11972e-05	0.00087609
Dnajc13	2.16935	0.0215301	0.187437	1.99867	0.023673	0.222721	1.90988	0.00673537	0.0461644
Dnajc2	2.85658	0.00827141	0.129745	2.88762	0.00283989	0.122393	3.66573	7.23879e-06	0.000699379
Dnajc21	1.48242	0.0810025	0.348124	1.8341	0.0504823	0.306521	1.89489	0.00404318	0.0315909
Dnajc25	1.12201	0.119709	0.420867	1.48022	0.040744	0.27926	1.44138	0.0182145	0.0914181
Dnajc28	-0.624407	0.465542	0.742046	-0.786651	0.268135	0.64318	-0.729324	0.396896	0.573319
Dnajc3	1.80162	0.0114519	0.147147	1.59999	0.0105836	0.170226	2.25979	0.000466505	0.00732413
Dnajc5	-0.107359	0.860048	0.942492	-0.614576	0.395885	0.74416	0.643961	0.233544	0.426247
Dnm1	0.102588	0.893809	0.956238	0.711782	0.32645	0.691031	0.163041	0.786658	0.866279
Dnm2	0.884006	0.176706	0.509067	0.00289753	1	1	1.26237	0.0395268	0.151474
Dnm3	-0.604671	0.478157	0.744886	-0.280201	0.738057	0.925899	-0.821116	0.337175	0.517983
Dnmbp	-0.406667	0.490435	0.750279	0.30073	0.667097	0.895289	-0.714055	0.171112	0.355381
Dnmt1	1.16785	0.122359	0.425801	-0.145848	0.836379	0.949403	1.08554	0.122789	0.29613
Dnmt3a	-0.443511	0.549938	0.776965	-0.487221	0.507149	0.814246	-1.37999	0.0197693	0.0962411
Dnttip2	2.44623	0.0162299	0.167177	3.16377	0.00598911	0.149508	3.13078	0.00012241	0.00320307
Dock3	-0.836997	0.358957	0.681873	-1.12361	0.0857747	0.389984	-1.73621	0.0591624	0.191402
Dock5	-0.667699	0.250758	0.599166	-1.11215	0.0586086	0.321451	-0.414235	0.382051	0.561071
Dock6	-0.491595	0.550412	0.777416	-0.24728	0.746482	0.928736	-1.06789	0.0901911	0.246663
Dock7	1.53233	0.0393927	0.23989	1.03293	0.0891264	0.400153	1.56579	0.0125277	0.0704806
Dock9	0.247301	0.693542	0.856211	-0.119244	0.841293	0.949958	-0.189482	0.714839	0.819443
Donson	1.45808	0.0658771	0.310184	2.03738	0.0128003	0.180114	1.46972	0.0405747	0.153963
Dopey1	-1.09158	0.113128	0.410366	-0.876884	0.135018	0.486259	-0.31415	0.587289	0.728105
Dot1l	-0.619605	0.323343	0.658502	-1.02884	0.103013	0.425956	-0.321663	0.549554	0.69945
Dpf2	-0.200549	0.785939	0.905632	-0.620571	0.520005	0.82051	0.792446	0.214621	0.405969
Dph5	-0.763229	0.38053	0.694952	-0.865316	0.223744	0.59926	-0.5252	0.434936	0.606641
Dpp9	1.89337	0.00985521	0.13808	2.04077	0.0169971	0.195125	1.37541	0.013005	0.0724618
Dpy19l1	1.70777	0.0233062	0.1929	0.767352	0.256508	0.633888	0.458776	0.455648	0.623772
Dpy19l3	0.0163407	0.973837	0.993315	-0.8765	0.187939	0.566069	-0.737862	0.223259	0.416043
Dr1	0.505971	0.424864	0.717228	0.813761	0.196642	0.57401	0.454459	0.424954	0.598199
Dram1	-0.699919	0.279017	0.622689	0.654666	0.381791	0.73604	-0.267565	0.662747	0.784481
Drosha	1.30952	0.061648	0.298094	0.490772	0.567078	0.843051	1.7828	0.00275917	0.0244051
Dse	1.06936	0.129923	0.438005	1.0691	0.108992	0.440348	0.427677	0.395863	0.572486
Dsel	0.0431827	0.940341	0.977534	-0.0756413	0.915748	0.97451	-0.79817	0.126759	0.300841
Dst	0.656671	0.42519	0.717228	0.64887	0.403442	0.748858	1.595	0.0188017	0.0930932
Dstn	2.55368	0.00351172	0.107378	2.20595	0.0016839	0.122393	2.815	9.84955e-05	0.00279571
Dtd2	-1.01647	0.23873	0.589455	0.207107	0.775486	0.936324	-1.02301	0.172356	0.357226
Dtl	1.39667	0.0485968	0.264232	1.67436	0.022368	0.216526	1.93943	0.00121403	0.0139892
Dtna	-0.574405	0.326957	0.660487	-0.710387	0.202957	0.577449	-0.574187	0.250712	0.442028
Dtwd2	-1.35491	0.0936906	0.376066	-0.892192	0.186727	0.564745	-1.28658	0.0816279	0.231825
Dtx3l	-0.86523	0.359128	0.681882	-0.810467	0.325383	0.691031	-1.36937	0.0959132	0.255071
Dtx4	-0.341314	0.689909	0.856211	-0.185418	0.820091	0.948029	-0.996691	0.0686773	0.210436
Dusp1	0.385331	0.5874	0.799106	0.215639	0.768395	0.933821	0.810642	0.203707	0.392667
Dusp10	-0.407193	0.501872	0.755069	-1.02139	0.19545	0.57401	-1.10403	0.0865968	0.241003
Dusp11	0.36182	0.605128	0.808124	0.0894516	0.887151	0.967031	0.670562	0.250126	0.441919
Dusp12	0.571493	0.514151	0.759914	1.22386	0.113012	0.446325	-0.129372	0.8436	0.905378
Dusp16	-0.0825884	0.915603	0.966492	0.041231	0.942074	0.984086	-0.22807	0.717075	0.820734
Dusp22	-1.33005	0.0710271	0.32263	-1.32551	0.0868087	0.392637	-1.35942	0.0550516	0.184632
Dusp4	1.40161	0.0398033	0.240607	2.79342	0.000305303	0.11887	3.17768	1.29698e-06	0.000342949
Dusp8	-1.10063	0.26842	0.611878	-0.180214	0.835709	0.949403	-2.52964	0.0122782	0.069506
Dux	-0.940049	0.416026	0.716937	-0.451391	0.578282	0.845052	-0.980093	0.358771	0.53805
Dvl3	0.535862	0.574102	0.790649	-0.671734	0.493018	0.80532	0.969609	0.190605	0.378647
Dync1h1	0.882014	0.293322	0.635468	0.99541	0.170268	0.541361	2.89961	0.000899433	0.011411
Dync1li2	0.306486	0.648241	0.833916	0.144221	0.839311	0.949958	0.700731	0.227409	0.420359
Dynll1	4.13284	0.00267692	0.107378	4.55368	0.000281737	0.11887	3.87796	3.22955e-05	0.00162252
Dynll2	0.0558555	0.951526	0.982826	-0.649898	0.42235	0.762949	0.593533	0.342352	0.522948
Dynlt3	1.75768	0.0335617	0.223375	1.19889	0.204291	0.578881	1.27572	0.0694308	0.211584
Dyrk1a	-0.233849	0.690239	0.856211	-0.967907	0.187793	0.565969	0.142431	0.78679	0.866279
Dyrk3	-1.01435	0.182796	0.520615	-0.523672	0.481902	0.801036	-1.42001	0.0483068	0.171758
Dysf	-0.723139	0.337625	0.67138	-0.943355	0.178169	0.552202	-0.599061	0.309725	0.493203
Dzip1	0.648712	0.411871	0.714489	1.22448	0.0397666	0.275949	0.736704	0.185065	0.373101
Dzip1l	0.438235	0.564477	0.783402	0.151197	0.823368	0.948349	-0.033388	0.979382	0.99102
Dzip3	1.62283	0.0669087	0.311827	1.74955	0.0141386	0.183073	1.25156	0.035622	0.141474
E030024N20Rik	0.463147	0.517206	0.761925	0.997266	0.182627	0.560831	-0.372347	0.601427	0.739856
E030030I06Rik	-1.09953	0.312741	0.648457	-0.613902	0.454408	0.785069	-0.723768	0.457889	0.625626
E130308A19Rik	0.194152	0.816214	0.921911	-0.587724	0.317202	0.683666	-1.00674	0.155404	0.335075
E130311K13Rik	0.430842	0.592576	0.80238	1.91954	0.0581234	0.321199	-0.219848	0.812872	0.885234
E130317F20Rik	-0.576064	0.560729	0.782526	-0.315969	0.735325	0.925088	-1.39869	0.116299	0.286695
E230016K23Rik	-0.599044	0.568399	0.786243	-0.782615	0.227387	0.603431	-1.43235	0.152428	0.332939
E2f3	-0.053612	0.934896	0.975913	-0.161672	0.789376	0.940121	-0.191329	0.707761	0.814801
E2f7	-0.444544	0.43799	0.726857	-0.537745	0.330365	0.693604	0.0158667	0.96606	0.983283
E2f8	-0.627382	0.32211	0.657838	-1.14094	0.0829949	0.38608	-0.92013	0.0868593	0.241311
E330020D12Rik	-0.931203	0.437489	0.726353	-0.82668	0.296831	0.666344	-1.05797	0.256569	0.447415
E330033B04Rik	-1.04105	0.23915	0.589455	-1.08052	0.105526	0.432787	-0.951252	0.250965	0.442028
E430025E21Rik	2.33962	0.013518	0.159192	1.62699	0.032854	0.257299	2.32831	0.000543739	0.0081302
Ebf3	-0.371795	0.566302	0.784816	-0.486681	0.469779	0.79339	-1.35847	0.021929	0.1022
Ect2	3.02117	0.000240084	0.102938	1.86	0.0653567	0.336878	1.53232	0.00788432	0.0517486
Eda2r	0.511881	0.424812	0.717228	1.6713	0.0288856	0.241553	1.88017	0.00156297	0.0165313
Edc4	-0.290695	0.646459	0.832132	0.0394536	0.960163	0.990157	0.377828	0.57943	0.722173
Edem1	-0.0799378	0.89875	0.958822	0.338071	0.602441	0.859603	-0.0706352	0.885632	0.933575
Edem2	-0.677183	0.466576	0.74257	0.0340982	0.970867	0.993814	-1.12501	0.203792	0.392667
Edem3	-0.255056	0.673228	0.847461	-0.217009	0.735656	0.925088	-0.594629	0.229058	0.422152
Ednra	-0.792289	0.333443	0.666621	-0.695688	0.38343	0.737567	-1.35398	0.149082	0.328909
Eea1	1.51843	0.0960974	0.379913	1.50414	0.145332	0.500223	2.2179	0.00229278	0.0215825
Eef1a1	4.93644	0.00121219	0.102938	3.82552	0.00191683	0.122393	4.93398	4.36359e-06	0.000626362
Eef1b2	3.72255	0.00296991	0.107378	2.99444	0.00567502	0.149508	3.74918	1.65737e-05	0.00109995
Eef1d	1.89362	0.0289751	0.208555	1.85122	0.0651677	0.336488	2.15835	0.00207171	0.0202495
Eef1g	2.06772	0.0420304	0.246395	1.56572	0.0640973	0.333557	2.90244	0.000338523	0.00586462
Eef2	2.25329	0.034672	0.226518	1.13251	0.142475	0.497232	4.19842	9.56837e-05	0.0027592
Efcab14	0.154551	0.81195	0.92025	-0.626095	0.374799	0.73109	0.0101529	1	1
Efcab2	-0.943607	0.240528	0.590105	0.669533	0.366336	0.721188	-1.24245	0.129629	0.304306
Efemp1	3.78275	0.00596701	0.116877	3.42515	0.0115367	0.174056	1.95966	0.0220689	0.102756
Efna5	-0.0737701	0.898229	0.958518	0.31485	0.623638	0.873719	-0.140526	0.80822	0.882173
Efnb2	0.474947	0.43533	0.723965	0.652251	0.268925	0.64318	1.31212	0.0361768	0.142878
Efr3a	1.51479	0.0234819	0.194035	1.02408	0.199292	0.57401	1.69808	0.00363093	0.0293276
Eftud1	0.324363	0.585896	0.798357	-0.555722	0.447503	0.781459	-0.0376652	0.932312	0.962584
Egln1	1.09269	0.070581	0.32136	1.05438	0.0999954	0.422165	0.289753	0.598468	0.738061
Ehbp1	0.300954	0.666886	0.843729	0.428172	0.598244	0.858737	0.459015	0.447011	0.616804
Ehbp1l1	-0.542367	0.418009	0.716994	-0.345981	0.689948	0.905143	-1.03124	0.0492657	0.173936
Ehd3	-0.811175	0.344009	0.673649	-0.631109	0.456112	0.786649	-0.376973	0.681885	0.796881
Ehd4	-0.340099	0.585782	0.798357	-0.375078	0.545998	0.831098	-0.660206	0.224285	0.417028
Ehmt2	0.60337	0.343915	0.673649	0.215666	0.729092	0.923352	0.607012	0.326921	0.510237
Ei24	0.252603	0.732748	0.877132	-0.553047	0.54402	0.830537	1.26339	0.0949379	0.25371
Eid1	0.941786	0.135178	0.448272	0.249957	0.657561	0.890416	-0.302835	0.52665	0.681167
Eif1	3.07464	0.00233152	0.105822	2.18331	0.00975763	0.169627	3.58303	4.79843e-05	0.00194414
Eif1a	3.0359	0.0138577	0.160417	2.95385	0.0133389	0.182104	2.74702	0.000371227	0.00621681
Eif1ad	0.722161	0.281996	0.625184	0.789636	0.325112	0.691031	2.12269	0.00198834	0.0196643
Eif2ak1	-0.554651	0.415875	0.716937	-0.497308	0.523215	0.821625	-0.291255	0.599682	0.738976
Eif2ak3	-0.541006	0.424848	0.717228	-1.02773	0.139387	0.492974	-0.640996	0.262214	0.452685
Eif2ak4	0.840466	0.260065	0.604892	0.413522	0.660028	0.890416	0.264906	0.643737	0.770031
Eif2b3	0.180365	0.7682	0.898527	0.070249	0.943039	0.984086	0.583744	0.290138	0.478075
Eif2b5	0.276293	0.739814	0.8816	-0.199753	0.834387	0.949266	0.728328	0.324241	0.507472
Eif2c1	-0.0753538	0.903344	0.960914	0.119492	0.876593	0.962834	-0.708411	0.134451	0.309288
Eif2c2	0.0715963	0.914341	0.966067	-0.458744	0.49756	0.806797	0.310474	0.590745	0.730758
Eif2c3	0.0407271	0.944527	0.979019	-0.000614979	1	1	0.737891	0.165456	0.348094
Eif2c4	-1.06694	0.224372	0.571212	-0.75339	0.253824	0.631606	-1.43834	0.101559	0.263006
Eif2s1	1.77964	0.0325274	0.22024	0.945813	0.273209	0.643552	2.08862	0.00217439	0.0208079
Eif2s2	3.18168	0.0119647	0.150965	3.77623	0.000655874	0.11887	3.6095	2.59228e-05	0.00141561
Eif2s3x	2.7157	0.00807822	0.129745	1.97044	0.0534856	0.311731	2.85578	0.00024	0.00472847
Eif3a	2.9751	0.0141404	0.161671	2.80199	0.0104674	0.170226	3.55071	7.51451e-05	0.00238942
Eif3b	1.72757	0.0382838	0.238135	1.23098	0.0665156	0.341034	2.77039	0.000955461	0.011897
Eif3c	3.69452	0.00160771	0.102938	2.8856	0.00809413	0.159467	4.1573	1.31523e-05	0.000971722
Eif3e	3.6355	0.00782281	0.129745	3.17062	0.00616006	0.149508	3.60685	3.94167e-05	0.00180027
Eif3i	2.50858	0.0161778	0.167177	1.96775	0.0447268	0.29043	2.81662	0.000160799	0.00386533
Eif4a1	1.9729	0.0388404	0.238727	1.21075	0.0726762	0.358751	2.4757	0.00180929	0.0184379
Eif4a2	2.41905	0.00165979	0.102938	2.2873	0.0179676	0.199525	2.26601	0.000178895	0.00406683
Eif4b	2.64493	0.00896129	0.133595	1.84312	0.0262974	0.230976	3.28258	0.000526771	0.00797138
Eif4e	2.28719	0.0229618	0.19113	1.89022	0.038429	0.272078	1.83212	0.00338702	0.0280799
Eif4e2	0.487498	0.44331	0.729831	0.197694	0.75345	0.930441	0.53612	0.356318	0.53544
Eif4enif1	1.49039	0.021618	0.18758	0.920748	0.15906	0.524298	1.54387	0.0167119	0.0864548
Eif4g2	3.00306	0.0066317	0.122487	1.85162	0.029974	0.246737	2.67805	0.00096209	0.0119227
Eif4g3	0.776738	0.244348	0.592187	1.06996	0.097707	0.417415	1.23907	0.0226254	0.10438
Eif4h	2.70863	0.00862907	0.132172	2.61143	0.0117256	0.175848	2.07654	0.002716	0.0241508
Eif5	1.73175	0.051727	0.272122	1.58387	0.0442294	0.29043	1.99444	0.00361484	0.0293276
Eif5a	2.869	0.00673377	0.122487	1.23666	0.0851922	0.389096	2.97761	0.00112587	0.0132467
Eif5a2	-0.214398	0.706055	0.860976	-0.313693	0.618672	0.869414	-0.40873	0.455661	0.623772
Eif5b	1.49763	0.105863	0.395264	1.52424	0.0817521	0.383237	1.89397	0.00814806	0.0531756
Eif6	0.953153	0.241299	0.590105	0.729623	0.426501	0.765537	2.30579	0.00624312	0.0435631
Elavl1	0.753476	0.347009	0.673649	0.024885	0.98087	0.999572	0.883286	0.169734	0.354276
Elavl2	0.03174	0.956825	0.985844	-0.668238	0.243473	0.623449	-0.787069	0.139715	0.317008
Elf1	0.0695698	0.923948	0.970706	-0.0736052	0.930009	0.97948	-0.236904	0.653717	0.777528
Elf4	-0.809583	0.185967	0.524928	-0.706596	0.283492	0.655136	0.0925575	0.89167	0.936788
Elk3	0.664568	0.282993	0.626233	0.153084	0.80699	0.945295	-0.385047	0.489631	0.650941
Elmo2	0.360845	0.536165	0.771237	0.928716	0.148135	0.504223	0.302509	0.565631	0.71257
Elmod2	-0.351346	0.632837	0.823811	0.0287414	0.969165	0.993336	-0.680245	0.277065	0.466793
Elmsan1	-0.907209	0.211495	0.556009	-0.531942	0.406835	0.752555	-0.754366	0.193658	0.380937
Elovl1	0.500172	0.525325	0.766105	1.24954	0.185156	0.56309	1.3754	0.0725497	0.216745
Elovl5	2.15074	0.00827119	0.129745	2.48322	4.21991e-05	0.106004	3.09376	8.97627e-06	0.000777531
Elovl6	0.748385	0.381002	0.694979	0.455366	0.556882	0.836607	0.16755	0.745353	0.840173
Emb	2.19548	0.0211702	0.186268	1.57545	0.095793	0.414372	1.48504	0.0313805	0.130402
Emc8	-0.998473	0.176209	0.509067	-1.24101	0.0517684	0.307577	-0.84229	0.141866	0.319325
Eme1	-0.120385	0.874104	0.9479	-0.332488	0.641706	0.883113	0.135026	0.861137	0.916268
Eml1	1.83377	0.0307334	0.215737	1.55275	0.0970181	0.416893	0.881653	0.190394	0.378528
Eml4	0.199481	0.780103	0.903294	0.268178	0.678435	0.899329	0.0455005	0.945572	0.971285
Eml5	0.740711	0.262718	0.607406	0.651843	0.32635	0.691031	0.18487	0.720498	0.821931
Emp1	4.15301	0.00059008	0.102938	2.99151	0.00459067	0.140561	1.64123	0.0106388	0.0639346
Emp2	0.151002	0.805667	0.917008	-1.09603	0.104393	0.42992	0.683776	0.206439	0.396161
Enah	0.189844	0.761154	0.894734	0.285887	0.636926	0.880898	0.818545	0.169208	0.353913
Endod1	-0.24064	0.683591	0.853745	0.187188	0.787658	0.940121	-0.541035	0.33849	0.519101
Endov	-1.30357	0.098819	0.383809	-0.616901	0.472192	0.795163	-1.03161	0.156222	0.336128
Eno2	-0.849507	0.272867	0.617567	-0.240935	0.821532	0.948168	-0.783847	0.333372	0.514921
Enpp2	-0.625534	0.379749	0.694525	0.861253	0.257403	0.634096	0.586836	0.33206	0.514263
Enpp4	-0.497956	0.45524	0.738812	-0.813994	0.199188	0.57401	-0.864893	0.214551	0.405969
Ensa	0.615228	0.344822	0.673649	0.427239	0.523264	0.821625	0.594659	0.328288	0.5117
Enthd2	-0.289	0.776054	0.902105	-0.00296589	1	1	-1.4711	0.0444468	0.163232
Entpd7	-1.01753	0.121515	0.424838	-1.13094	0.04928	0.303782	-0.910919	0.112485	0.281236
Ep300	0.24894	0.716441	0.86649	0.272983	0.736941	0.925367	0.278372	0.60127	0.739856
Ep400	0.580772	0.377205	0.694221	0.227125	0.707313	0.914447	0.657545	0.220585	0.413177
Epb4.1l1	0.167159	0.777587	0.902634	-0.431902	0.508515	0.815048	-0.0663062	0.89185	0.936788
Epb4.1l3	1.77601	0.0178732	0.173016	1.28624	0.0665234	0.341034	1.60487	0.0108443	0.0645181
Epb4.1l4a	-0.227311	0.71365	0.864465	-0.764553	0.27677	0.647451	-0.713369	0.20837	0.398953
Epb4.1l5	-1.42029	0.0496712	0.266611	-0.922946	0.15726	0.522534	-1.36727	0.0486683	0.172757
Epc2	1.18274	0.0833298	0.353683	1.69424	0.026588	0.231104	1.29264	0.0189689	0.0934314
Epg5	-0.288993	0.691864	0.856211	-0.452725	0.500592	0.809454	-0.348755	0.51549	0.672856
Epha4	-0.809476	0.174326	0.508182	-0.879978	0.154418	0.514795	-1.0647	0.0691791	0.211152
Epha7	-0.237718	0.715482	0.865956	-0.978872	0.194943	0.57401	-0.849242	0.175136	0.360608
Ephb4	-1.22767	0.186447	0.525651	-0.925298	0.23209	0.608569	-1.24819	0.0574796	0.189084
Ephx1	1.67313	0.0764359	0.336559	1.06844	0.288943	0.659269	2.64284	0.000340762	0.00588313
Epm2aip1	0.169809	0.79736	0.912005	-0.0651626	0.935982	0.982028	-0.546007	0.344296	0.525119
Epn1	-0.129702	0.862547	0.944068	0.417562	0.536726	0.828315	0.0371029	0.969717	0.98492
Epn2	-0.576158	0.385158	0.697077	-0.823716	0.196298	0.57401	-0.163556	0.771839	0.857523
Eprs	2.46745	0.0221984	0.189242	1.62764	0.112769	0.44613	2.80591	0.000694369	0.00977174
Eps8	2.19535	0.0441458	0.253126	2.23368	0.02335	0.222179	1.99265	0.00544257	0.0390064
Ept1	-0.0850482	0.888211	0.95411	-0.481907	0.401613	0.748232	-0.406946	0.417738	0.592356
Eral1	-0.666353	0.354613	0.678954	0.585994	0.415136	0.759041	-0.620493	0.314734	0.497553
Erbb2ip	2.23443	0.0245827	0.198559	2.15737	0.0102149	0.170226	2.01503	0.00279442	0.024587
Erc1	-0.185351	0.787875	0.906824	-0.458698	0.496176	0.806766	0.160385	0.775537	0.859019
Erc2	-0.622983	0.409538	0.714167	-1.8575	0.0258073	0.229074	-1.0016	0.192208	0.379283
Ercc4	-0.0957106	0.917813	0.967119	-0.262922	0.770149	0.934596	-0.974573	0.154312	0.33435
Ercc5	0.466601	0.499718	0.753267	1.16144	0.126164	0.469183	0.926407	0.094113	0.252277
Ercc6	-0.975382	0.193904	0.535191	0.0324967	0.957106	0.990157	-0.489543	0.418116	0.592557
Ercc6l	0.11794	0.860991	0.943191	-0.560428	0.437553	0.772134	0.354543	0.520646	0.677825
Ercc6l2	-0.211844	0.779052	0.90315	-0.197683	0.808751	0.945857	-0.764783	0.272324	0.462214
Erdr1	-0.159789	0.815432	0.92156	0.394569	0.576147	0.845052	0.951661	0.137118	0.313127
Erf	-0.706308	0.467601	0.74257	-1.57224	0.0521299	0.308845	-1.52806	0.0787429	0.226572
Ergic2	1.58084	0.0785024	0.340816	1.32685	0.175235	0.548184	1.02505	0.0988168	0.25941
Eri1	1.00798	0.121066	0.424746	0.633439	0.330377	0.693604	1.13473	0.0433361	0.160679
Eri2	-0.151592	0.853551	0.939785	-0.781818	0.269832	0.64318	-1.59175	0.0571631	0.188815
Erlin1	0.662962	0.254039	0.600744	0.973471	0.106797	0.435864	0.846573	0.0835336	0.234979
Erlin2	0.116668	0.869813	0.946679	0.141497	0.817165	0.947098	-1.26668	0.0426546	0.158856
Ermp1	0.315639	0.614188	0.81244	0.136446	0.828855	0.948805	0.196328	0.686712	0.799361
Ero1l	1.19093	0.0843145	0.354392	1.67214	0.00991438	0.170226	2.78632	0.00029081	0.00535979
Ero1lb	-2.09427	0.00819844	0.129745	-0.380599	0.632532	0.8781	-1.6014	0.0120543	0.0691335
Errfi1	1.34452	0.104565	0.392739	1.31826	0.142142	0.4972	1.21573	0.0329635	0.135191
Esco1	-0.33476	0.571538	0.788848	0.516621	0.507	0.814246	-0.0280974	0.97002	0.98492
Esd	3.52192	0.00211873	0.102938	2.8355	0.00115496	0.122393	3.98728	5.92995e-06	0.00065334
Esf1	1.83321	0.0615829	0.298066	2.22023	0.0372869	0.270289	2.52074	0.00137485	0.0151144
Espl1	-0.241071	0.665714	0.843093	-0.57999	0.311532	0.678135	-0.643851	0.229555	0.422449
Esrra	-0.91502	0.285889	0.628391	-0.278996	0.72026	0.919609	-0.92566	0.141355	0.319135
Esyt2	2.03235	0.00852853	0.131032	1.14525	0.0671383	0.342092	2.03948	0.000456228	0.00725344
Etf1	2.24236	0.017746	0.172115	1.97352	0.0358284	0.266669	3.04061	0.000221639	0.00453912
Etl4	-0.50729	0.480373	0.746151	-1.28855	0.0446898	0.29043	-0.930089	0.109116	0.275616
Etnk1	-0.170199	0.802754	0.914935	0.270751	0.776492	0.936469	0.185792	0.724849	0.824273
Etohi1	0.774051	0.226323	0.574033	0.875995	0.196412	0.57401	-0.33954	0.573051	0.716885
Etv3	-0.527316	0.462212	0.741747	-0.494759	0.464008	0.791797	-0.514096	0.415274	0.590219
Etv5	0.0652297	0.92984	0.973841	0.265468	0.715444	0.917953	-0.263473	0.688694	0.800369
Etv6	-0.307101	0.666888	0.843729	-0.831745	0.200823	0.576153	-0.741956	0.154281	0.33435
Evc	-0.411554	0.514615	0.759914	-0.547687	0.546389	0.831098	-0.398863	0.487317	0.649239
Evi2b	-1.42474	0.140576	0.457419	0.10874	0.882463	0.964971	-1.11209	0.254835	0.445629
Evi5	0.885774	0.195581	0.535829	1.23995	0.07938	0.377528	1.17099	0.0249741	0.111656
Evl	1.03345	0.193042	0.534347	0.52362	0.47853	0.800309	1.19578	0.0869977	0.241333
Exo1	0.29116	0.606828	0.80844	0.595475	0.312933	0.680007	0.257916	0.611145	0.746574
Exoc3	-0.0349224	0.956998	0.985844	-0.908041	0.188831	0.566741	-0.446879	0.400194	0.575436
Exoc4	0.382614	0.570613	0.788111	0.157723	0.863358	0.958723	1.21492	0.0500532	0.175728
Exoc5	1.52118	0.0572011	0.287845	1.19668	0.132491	0.482311	1.09983	0.0826381	0.233113
Exoc6b	0.0653607	0.926629	0.972302	-0.354362	0.544336	0.830724	0.537579	0.302292	0.486366
Exoc8	-0.404801	0.532633	0.770241	-0.727865	0.268767	0.64318	-1.01823	0.0725648	0.216745
Exosc2	-0.103996	0.866107	0.945323	-0.069458	0.916507	0.97451	0.406266	0.463084	0.627878
Exosc4	-1.47463	0.0288562	0.208303	-0.204009	0.805711	0.945295	-0.997697	0.131592	0.306926
Ext2	1.09948	0.11365	0.411072	0.425982	0.594947	0.85659	0.491528	0.416039	0.59078
Extl3	-0.910182	0.207185	0.547934	-0.777012	0.326049	0.691031	-0.869807	0.161411	0.3427
Eya3	0.47309	0.475241	0.744885	0.672308	0.328811	0.692507	0.959874	0.100305	0.261672
Eya4	-0.75387	0.301715	0.64284	0.724869	0.449921	0.783502	-0.742792	0.340381	0.520888
Ezh1	-0.00838998	1	1	-0.575461	0.501743	0.810552	-0.848274	0.280495	0.469423
F2r	3.05044	0.00385053	0.107378	1.6881	0.0167486	0.195125	1.76447	0.00229823	0.0215825
F830016B08Rik	-0.975564	0.379486	0.694525	-0.429898	0.602224	0.859603	-1.29184	0.198892	0.38715
Fabp5	3.66328	0.00310174	0.107378	1.88257	0.0308702	0.250958	2.70026	0.000505717	0.00769916
Fadd	-1.25696	0.0785616	0.340816	-0.370913	0.61553	0.868163	-1.60007	0.0263243	0.11591
Fads1	1.12578	0.128255	0.43596	0.629711	0.309112	0.676765	1.26918	0.068546	0.210241
Fads3	0.453483	0.45655	0.739666	0.581664	0.492933	0.80532	0.956316	0.0554763	0.185685
Faf1	0.736596	0.26031	0.605182	0.912673	0.271455	0.643552	1.46031	0.00776679	0.0512751
Faf2	0.586265	0.365562	0.687909	-0.0899699	0.934028	0.981554	0.507749	0.436947	0.609107
Fahd1	-0.309641	0.607108	0.80844	0.212288	0.743363	0.927218	-1.52672	0.0504676	0.176321
Fam101b	-0.206296	0.770421	0.899059	-0.523479	0.379016	0.73407	-0.575913	0.261297	0.452685
Fam102b	1.07046	0.135272	0.44829	0.674151	0.29767	0.666737	-0.182911	0.73439	0.832485
Fam111a	1.15015	0.129528	0.437677	0.370944	0.577376	0.845052	0.371866	0.53099	0.684375
Fam114a1	1.35182	0.0641911	0.305967	0.80956	0.228354	0.604452	0.691099	0.238758	0.432415
Fam114a2	1.05196	0.116907	0.417103	0.0829629	0.930254	0.97948	0.764722	0.194817	0.382168
Fam115c	-0.379251	0.599718	0.806686	0.226308	0.769045	0.933946	-0.801903	0.235551	0.428305
Fam117b	-0.980893	0.129363	0.437655	-0.695112	0.24709	0.627141	-1.01723	0.0516556	0.178731
Fam120a	1.59275	0.0283824	0.207208	1.3115	0.0291466	0.24223	1.81167	0.00265417	0.0237693
Fam120b	0.40212	0.499155	0.753267	0.158118	0.805068	0.945014	0.165323	0.759259	0.848236
Fam122a	-0.0653692	0.920055	0.968844	0.462446	0.51103	0.815614	-1.23276	0.0630906	0.198726
Fam126a	0.839605	0.186758	0.526232	0.77119	0.31046	0.677875	0.933841	0.0582115	0.19018
Fam126b	-0.376085	0.546219	0.77578	-0.668005	0.267814	0.64318	-0.655075	0.308204	0.492388
Fam129b	1.14957	0.10115	0.387921	0.0776191	0.933112	0.981154	1.35836	0.0294474	0.124953
Fam132b	-1.04708	0.245859	0.593453	-0.126698	0.895658	0.970409	-1.19294	0.213311	0.404827
Fam135a	0.281825	0.682848	0.853177	0.355654	0.609169	0.863972	0.781231	0.199411	0.387614
Fam136a	0.237985	0.730486	0.875345	-0.660701	0.342435	0.702599	-0.453474	0.476375	0.64001
Fam160a1	-1.53752	0.029984	0.21337	-1.408	0.0479833	0.299092	-1.33991	0.0475993	0.170301
Fam160a2	-1.09669	0.115171	0.414068	-1.01592	0.0910329	0.405093	-1.05665	0.0798459	0.228443
Fam160b1	-0.869405	0.245121	0.593425	-0.371184	0.592389	0.856072	-0.794368	0.141201	0.319116
Fam161b	-0.692587	0.395142	0.703752	-0.425668	0.514966	0.817437	-1.94684	0.0122	0.0693724
Fam168a	-0.186864	0.745115	0.885816	-0.0782631	0.91504	0.97451	-0.355444	0.480685	0.643983
Fam168b	1.89124	0.0151011	0.164188	1.51779	0.0192807	0.203483	1.4326	0.0140734	0.0762729
Fam171a1	-0.047733	0.948861	0.981253	-0.0631948	0.915855	0.97451	-0.293659	0.562532	0.709734
Fam171a2	-0.697274	0.469188	0.744324	0.293682	0.717808	0.919609	-1.61101	0.0686932	0.210436
Fam178a	0.242363	0.730906	0.875345	-0.0301787	0.965646	0.992436	0.347094	0.533632	0.685936
Fam179b	0.661354	0.382414	0.696328	1.45102	0.035459	0.266238	1.09734	0.0740129	0.219554
Fam193a	0.62833	0.284925	0.627559	0.229933	0.691551	0.905143	0.728364	0.153324	0.333397
Fam198b	2.18187	0.0331237	0.221539	1.78212	0.0741501	0.36309	1.27093	0.0570417	0.188662
Fam199x	-0.702152	0.269212	0.612588	-0.49388	0.435178	0.770922	-0.649845	0.270628	0.461157
Fam19a1	-0.825956	0.278828	0.622592	0.339891	0.708463	0.914926	-2.03551	0.0129188	0.0721956
Fam19a5	-0.820615	0.365999	0.687909	-1.25179	0.113092	0.446325	-1.70581	0.0636009	0.199458
Fam21	1.24401	0.191893	0.532247	0.452411	0.63438	0.87945	2.01311	0.00546487	0.0390548
Fam210a	0.518178	0.434515	0.723141	0.0708091	0.912576	0.974426	0.206079	0.693766	0.804775
Fam211a	-0.100289	0.928574	0.973306	1.32236	0.0988784	0.419748	-0.735718	0.354972	0.534266
Fam214a	-0.610456	0.398228	0.706212	-1.55291	0.0430931	0.287571	-0.642797	0.373361	0.553323
Fam220a	-0.862779	0.233864	0.585418	-0.944209	0.238724	0.616315	-1.20549	0.0731001	0.217697
Fam222b	-0.27945	0.703238	0.859209	0.0168247	0.986498	1	-0.442127	0.483734	0.646523
Fam228a	-0.523379	0.568944	0.786781	-0.355995	0.689434	0.905143	-1.06617	0.21828	0.410727
Fam3c	1.797	0.0265185	0.204681	1.51707	0.0902468	0.40374	1.11646	0.0525566	0.180481
Fam43a	-0.646512	0.258714	0.603714	-0.810029	0.209261	0.584507	-1.24277	0.0702916	0.213574
Fam46a	-1.02242	0.199593	0.539009	-0.00500291	1	1	-0.907936	0.207096	0.396815
Fam46b	-0.352738	0.648988	0.83402	-1.7609	0.0267409	0.2312	-2.01845	0.0091222	0.0576708
Fam49b	1.19112	0.21831	0.56512	1.07734	0.117624	0.454572	0.216145	0.713565	0.819354
Fam53a	0.447039	0.574894	0.791306	0.995571	0.186049	0.564124	0.665321	0.242894	0.435044
Fam53b	-0.382375	0.691855	0.856211	-0.173159	0.844967	0.951393	-0.384805	0.67586	0.792791
Fam60a	-0.83625	0.149896	0.470138	-0.214299	0.742519	0.927218	-0.617688	0.230716	0.423928
Fam63a	0.482356	0.505427	0.756101	0.501909	0.484234	0.801037	0.411243	0.48191	0.644943
Fam63b	-0.293092	0.612282	0.810937	-0.227886	0.712938	0.917601	-1.05693	0.0606399	0.194829
Fam65b	-0.72969	0.441334	0.728817	-0.918267	0.318339	0.685234	-1.1921	0.206239	0.396072
Fam69a	1.20112	0.0641252	0.30595	0.491828	0.443659	0.777991	0.289379	0.634037	0.761834
Fam73b	-1.3743	0.145249	0.4645	-1.05382	0.256146	0.633306	-1.34047	0.0494102	0.174324
Fam76b	1.04139	0.109735	0.402451	0.89988	0.181148	0.557309	0.172067	0.780713	0.862803
Fam78b	-0.523762	0.552556	0.778768	-0.523371	0.405	0.750542	-0.928539	0.248996	0.440477
Fam83h	-1.1969	0.177038	0.509414	-0.407446	0.569793	0.844188	-1.74437	0.0345215	0.139306
Fam84b	-0.561175	0.536582	0.771237	-1.02699	0.232868	0.609975	-0.862759	0.308416	0.492525
Fam98a	-0.295725	0.686251	0.854243	0.182638	0.776306	0.936469	-0.595611	0.340202	0.520832
Fam98b	2.81939	0.0059788	0.116877	2.07171	0.0341745	0.262089	2.29533	0.000645752	0.00937647
Fan1	-0.665351	0.411654	0.714489	-0.482119	0.579928	0.845632	-1.18068	0.108966	0.275512
Fanca	0.204325	0.8089	0.91815	0.744672	0.270719	0.643552	0.304646	0.674269	0.791478
Fancf	0.840407	0.178394	0.512143	0.186962	0.772589	0.935224	-0.583469	0.375862	0.555493
Fancm	0.102724	0.858784	0.942344	0.148856	0.812059	0.945857	-0.250751	0.614696	0.749703
Far1	1.97637	0.0335685	0.223375	1.87286	0.037062	0.270246	1.65995	0.00477473	0.0355382
Farp1	0.637389	0.357045	0.680704	0.612919	0.484863	0.801037	0.581166	0.35039	0.530027
Fasn	0.444761	0.567732	0.785538	0.515222	0.487833	0.801725	1.86611	0.0204742	0.0980573
Fastkd5	-0.124784	0.883203	0.951375	-0.470634	0.463133	0.791422	-0.735527	0.197246	0.384542
Fat1	0.237751	0.762401	0.895559	0.323301	0.670716	0.898101	1.51363	0.0417275	0.156798
Fat2	-0.689272	0.526082	0.766493	-0.318882	0.742284	0.927218	-1.09212	0.186981	0.374997
Fat4	-0.113605	0.890611	0.955343	-0.583789	0.442343	0.777039	-0.685782	0.270839	0.461253
Fau	0.925566	0.174528	0.508306	-0.0402053	0.985088	1	3.45166	0.000531717	0.00799805
Faxc	-0.799525	0.209846	0.553421	-0.806367	0.25234	0.629472	-0.643532	0.261593	0.452685
Fbl	0.357359	0.581426	0.796153	-0.0705876	0.898398	0.972329	0.67003	0.262161	0.452685
Fblim1	-0.472627	0.48845	0.748788	0.178609	0.785866	0.940121	-1.07418	0.138088	0.31477
Fbln2	2.32218	0.024512	0.198559	2.22144	0.0423237	0.285621	2.76063	0.000926333	0.0116697
Fbln5	1.84475	0.036818	0.234144	1.06741	0.0999174	0.422165	1.54125	0.0226192	0.10438
Fbn1	-0.101903	0.880134	0.950021	-0.66608	0.27906	0.648772	0.0122043	0.989066	0.996804
Fbrsl1	0.0462603	0.944314	0.979	-0.344709	0.551938	0.834153	-0.696243	0.18385	0.371396
Fbxl14	0.518502	0.405497	0.71188	-0.389953	0.537846	0.828878	0.255543	0.61729	0.751457
Fbxl16	-0.610205	0.462424	0.741747	0.213672	0.795886	0.941884	-1.06681	0.285354	0.473923
Fbxl17	-0.579404	0.494451	0.751782	-0.60328	0.422444	0.762949	-0.892955	0.192669	0.380043
Fbxl2	0.339759	0.607132	0.80844	0.854521	0.358609	0.716349	0.104967	0.862387	0.917154
Fbxl20	-0.635299	0.371819	0.689617	-1.17387	0.177988	0.551981	-1.09903	0.0690896	0.21104
Fbxl22	0.0140141	0.98611	0.996763	-0.240121	0.709789	0.915763	-1.2275	0.0739026	0.219554
Fbxl3	0.550326	0.372376	0.689617	1.07571	0.097352	0.416962	-0.021475	0.983325	0.99321
Fbxl5	-0.523868	0.465699	0.742046	0.856416	0.196988	0.57401	-0.184369	0.73574	0.833449
Fbxo11	2.44053	0.00809427	0.129745	2.41796	0.0185866	0.199528	2.70585	4.12063e-05	0.0018318
Fbxo17	0.639507	0.375306	0.692509	0.470077	0.553177	0.834405	-0.140191	0.892152	0.936909
Fbxo22	0.902543	0.143503	0.462748	0.813948	0.32831	0.692507	0.37532	0.497395	0.656917
Fbxo28	-0.291981	0.613665	0.811971	-0.329251	0.569327	0.843995	-0.468632	0.326706	0.510218
Fbxo3	0.85654	0.147826	0.468272	0.0189487	0.990518	1	0.538247	0.317502	0.500668
Fbxo30	0.774779	0.224437	0.571212	0.525883	0.5366	0.828315	0.484406	0.358552	0.538043
Fbxo31	-1.00118	0.245693	0.593453	0.185862	0.803878	0.944712	-1.32208	0.132207	0.30727
Fbxo33	0.738335	0.248267	0.597364	0.749962	0.241517	0.620656	0.53762	0.342163	0.522899
Fbxo4	-0.319524	0.565904	0.784521	-0.707242	0.216009	0.588906	-0.84103	0.150944	0.331355
Fbxo41	-0.85694	0.353457	0.677515	-0.877546	0.275767	0.646172	-0.860678	0.329434	0.512423
Fbxo42	-0.501446	0.46506	0.742046	-0.795987	0.160272	0.525604	-0.441217	0.373202	0.553251
Fbxo45	-0.332405	0.565783	0.784521	0.257584	0.72445	0.920728	-0.276189	0.575758	0.71884
Fbxw2	0.620756	0.305464	0.644231	0.22368	0.69949	0.908866	0.391802	0.465731	0.629834
Fbxw7	-0.340012	0.587793	0.799208	-0.491686	0.383464	0.737567	-0.762361	0.186933	0.374997
Fbxw8	-0.867835	0.318968	0.655686	-1.32884	0.0513718	0.307577	0.511609	0.35009	0.530027
Fcf1	1.30573	0.0812289	0.348421	0.988582	0.247661	0.627141	0.812643	0.233462	0.426247
Fcho2	1.09359	0.125785	0.432247	1.22043	0.057757	0.320277	0.834291	0.142301	0.319875
Fem1a	-0.470456	0.534025	0.770716	-0.0289839	0.978581	0.997442	-0.845941	0.246462	0.438203
Fem1b	0.740705	0.262259	0.606798	0.661038	0.417762	0.760724	0.942611	0.0823723	0.232755
Fem1c	0.0707524	0.915668	0.966492	0.217815	0.776229	0.936469	0.347946	0.565846	0.712663
Fen1	-0.225941	0.694217	0.856211	1.05907	0.0908521	0.405093	-0.0846042	0.859715	0.915669
Fert2	1.90132	0.0319396	0.218772	1.69303	0.0397774	0.275949	1.54156	0.0382161	0.148242
Fgd4	-1.36075	0.0426951	0.248552	0.294889	0.654448	0.889596	-1.41345	0.063444	0.199339
Fgd6	-0.30264	0.722879	0.87038	-0.630001	0.305466	0.67387	-0.484804	0.445174	0.615799
Fgf10	0.663522	0.268158	0.61182	0.0807078	0.918324	0.975198	-0.207789	0.714139	0.819354
Fgf7	3.23519	0.0112779	0.146032	3.36961	0.00984068	0.170226	2.40816	0.00354464	0.0290795
Fgf9	-1.20289	0.205056	0.546257	0.241779	0.774015	0.935446	-1.70617	0.0540087	0.18279
Fgfbp3	-0.467188	0.599119	0.806686	0.138718	0.836151	0.949403	-1.08033	0.178578	0.365457
Fgfr1	2.35978	0.0249779	0.199823	2.02138	0.0114616	0.173443	1.44562	0.0397119	0.151952
Fgfr1op	-0.0385987	0.949123	0.981253	0.383576	0.672354	0.898379	-0.203897	0.717744	0.820734
Fgfr1op2	1.14496	0.153338	0.473784	0.90129	0.205895	0.580938	0.812227	0.223989	0.416786
Fgfr2	0.480051	0.506629	0.756101	0.572148	0.359253	0.716794	-0.00553766	1	1
Fh1	1.98157	0.0316713	0.217372	1.79459	0.0528148	0.309616	1.45878	0.0491666	0.17383
Fhdc1	-0.0999794	0.895308	0.957027	-0.354339	0.602828	0.859912	-0.609676	0.299321	0.485877
Fhl2	1.88956	0.0260508	0.203861	1.33725	0.049701	0.304628	1.50799	0.0650584	0.203015
Fibin	-1.39788	0.127196	0.434238	-1.39126	0.0677241	0.343683	-1.15828	0.0787839	0.226572
Fign	-1.1684	0.10831	0.400111	-0.24276	0.723962	0.920665	-1.3639	0.0647471	0.202646
Fignl2	-1.21455	0.16227	0.487879	-1.1348	0.08462	0.387913	-1.71682	0.0443153	0.162987
Fip1l1	2.81426	0.00177193	0.102938	2.57904	0.00248527	0.122393	3.27908	3.276e-05	0.00162957
Fiz1	-1.02194	0.132095	0.443316	-0.973723	0.138699	0.492802	-1.21309	0.0331394	0.135801
Fjx1	-1.02489	0.142536	0.460516	0.256291	0.717934	0.919609	-1.20892	0.120811	0.293499
Fkbp10	-0.0316194	0.975683	0.993681	-0.485921	0.600498	0.859364	0.49579	0.464255	0.628854
Fkbp14	0.294867	0.641271	0.828851	0.191048	0.763875	0.933111	-1.36635	0.0350898	0.140471
Fkbp5	-1.16286	0.0496536	0.266611	-1.57581	0.0321255	0.254974	-0.944765	0.073974	0.219554
Fkrp	0.0334252	0.95679	0.985844	-0.239547	0.709755	0.915763	-0.899332	0.165274	0.348004
Flcn	0.729321	0.264069	0.608013	0.542683	0.413008	0.757915	0.103188	0.859638	0.915669
Fli1	-1.18526	0.151531	0.470999	-0.940097	0.184443	0.562649	-1.85674	0.0102138	0.0619737
Flna	2.47322	0.0186668	0.175294	1.0452	0.257602	0.634096	3.67582	0.00039237	0.00644204
Flnb	0.301853	0.661392	0.840594	-0.190201	0.781884	0.938635	2.58386	0.0011909	0.013786
Flnc	0.522481	0.486002	0.747534	-0.729549	0.247624	0.627141	1.48245	0.0279839	0.121095
Flrt2	-0.339229	0.565799	0.784521	0.209579	0.737419	0.925649	0.142963	0.784013	0.865308
Fmn1	-0.230355	0.752116	0.889636	-0.626982	0.33955	0.700757	-0.605609	0.306158	0.490216
Fmnl2	1.67369	0.0226706	0.191103	2.02365	0.00416331	0.133226	1.26392	0.0303655	0.127769
Fmo5	-1.62619	0.0961125	0.379913	-1.11722	0.13623	0.488637	-2.34057	0.0203499	0.0977497
Fmr1	3.38128	0.000817408	0.102938	2.86555	0.00401573	0.133226	3.38218	4.71861e-06	0.000642043
Fn1	3.9385	0.00576358	0.115364	3.65236	0.00189666	0.122393	4.80614	5.07892e-06	0.000642043
Fnbp1	-1.27212	0.0387761	0.238727	-0.553985	0.362089	0.718955	-0.717416	0.136013	0.311313
Fnbp4	1.244	0.0785004	0.340816	1.22998	0.0706489	0.352823	1.02772	0.0879035	0.242386
Fndc3b	0.749961	0.290853	0.633123	0.13327	0.842132	0.950117	1.19764	0.038934	0.149861
Fnip1	2.1372	0.0242246	0.198008	1.49335	0.0987891	0.419748	1.72971	0.0122219	0.0693815
Fnip2	-0.188676	0.782003	0.904233	-0.356413	0.575629	0.845052	-0.13379	0.80669	0.881348
Fosb	-0.155332	0.872742	0.947215	0.638119	0.370321	0.72562	-0.819273	0.368244	0.547841
Foxc1	0.407546	0.526608	0.766493	0.248602	0.697383	0.907646	-0.121764	0.859673	0.915669
Foxc2	0.12918	0.858876	0.942344	1.11259	0.0775411	0.374223	0.337642	0.558135	0.706228
Foxd2	-0.867269	0.366586	0.688496	0.33038	0.685535	0.903733	-0.787713	0.403667	0.579104
Foxf1	-0.278573	0.776942	0.902302	-0.244867	0.79465	0.941884	-1.00286	0.295832	0.483022
Foxf2	0.864329	0.180718	0.516455	0.702719	0.272935	0.643552	-0.344699	0.528523	0.682564
Foxg1	1.17605	0.116636	0.417103	1.76753	0.0436901	0.288815	0.790278	0.141441	0.319135
Foxj2	-0.0895203	0.903086	0.960885	-0.72095	0.315361	0.682921	-0.520219	0.352857	0.532198
Foxj3	0.0698624	0.905618	0.962494	-0.122429	0.857851	0.956043	0.473808	0.381292	0.560285
Foxk1	-1.04828	0.162921	0.488958	-0.204872	0.782388	0.938697	-1.63867	0.00388242	0.0307626
Foxk2	0.757103	0.216407	0.563851	0.730958	0.373938	0.73109	1.08392	0.0342751	0.138534
Foxm1	0.396223	0.535512	0.771145	-0.162838	0.794828	0.941884	0.291598	0.550607	0.699962
Foxn2	1.08593	0.190834	0.530281	1.42718	0.198971	0.57401	0.862672	0.177309	0.36374
Foxn3	-0.0843139	0.934155	0.975913	-0.231994	0.826621	0.948805	-0.285837	0.712891	0.819017
Foxo1	-0.549806	0.430289	0.719753	-0.431499	0.496682	0.806766	-0.959478	0.132062	0.30727
Foxo3	-0.56234	0.435782	0.724477	-1.12867	0.102535	0.424976	-0.0255717	0.980807	0.991822
Foxp1	-0.217302	0.752849	0.889636	-0.180991	0.815045	0.946396	-0.421589	0.393497	0.571055
Foxp2	-1.22154	0.101551	0.388122	-0.372666	0.649828	0.887001	-1.4794	0.105504	0.268667
Frk	-0.210909	0.71915	0.868095	0.151394	0.830836	0.948879	-0.340459	0.523009	0.678439
Frmd4a	0.789356	0.241471	0.590105	0.661835	0.321108	0.687669	0.729237	0.178709	0.365457
Frmd6	0.160305	0.789423	0.907469	-0.18487	0.778359	0.937314	-0.453049	0.450831	0.620145
Frmd8	0.450734	0.436771	0.725881	-0.24988	0.741024	0.927173	0.418219	0.42936	0.602207
Frs2	0.650165	0.345512	0.673649	0.269365	0.664136	0.892383	0.525334	0.322623	0.50636
Fryl	-0.687882	0.284573	0.627334	-0.62121	0.344357	0.702599	-0.393494	0.450913	0.620145
Fscn1	1.24849	0.168479	0.49732	0.93365	0.376017	0.73109	-0.0604705	0.909523	0.948945
Fsd1l	-1.31913	0.0690284	0.317063	-0.579137	0.38435	0.73801	-1.41208	0.011581	0.067228
Fstl1	2.89856	0.00807936	0.129745	1.79313	0.0428194	0.28695	1.86456	0.0138004	0.0751173
Fth1	4.72946	0.00192105	0.102938	4.89695	0.000488014	0.11887	5.47168	1.15936e-07	8.17157e-05
Ftl1	1.59577	0.102217	0.388322	0.0980393	0.898716	0.97234	4.06857	0.00021778	0.00453912
Fto	0.12985	0.87526	0.9479	-1.00372	0.312386	0.679406	0.546357	0.405915	0.581002
Ftsj1	-1.28821	0.049959	0.267476	-0.449237	0.621187	0.871261	-0.967202	0.0865078	0.241003
Ftsjd1	0.494588	0.425386	0.717228	0.923241	0.155559	0.517717	-0.0706077	0.936529	0.965351
Ftsjd2	-0.174307	0.809594	0.91815	0.033282	0.959701	0.990157	0.130575	0.867929	0.921877
Ftx	-0.825947	0.169264	0.498883	-0.240117	0.686133	0.903755	-0.468197	0.409289	0.5845
Fubp1	1.74124	0.0608716	0.296049	1.80891	0.033524	0.259114	1.76132	0.00900729	0.0572094
Fubp3	0.371194	0.60341	0.806686	0.760943	0.193662	0.573001	0.834579	0.154852	0.334757
Fuk	-0.476509	0.59698	0.805781	0.353022	0.630855	0.877225	-0.372898	0.684438	0.797823
Fus	3.1082	0.00199119	0.102938	2.40013	0.000780795	0.11887	3.76453	4.30168e-05	0.00184178
Fut10	-1.08943	0.144688	0.463603	0.922408	0.211204	0.586199	-0.811619	0.321498	0.505126
Fut8	-1.12494	0.266093	0.610156	-0.668523	0.412139	0.757577	-1.38441	0.115642	0.28606
Fxn	-1.14386	0.199816	0.539009	-0.50288	0.53165	0.825915	-1.08682	0.1636	0.345476
Fxr1	3.85425	0.00109042	0.102938	3.65035	0.0018497	0.122393	4.83506	7.64672e-08	7.68343e-05
Fxr2	0.382676	0.611303	0.810553	0.304188	0.735322	0.925088	0.999032	0.118848	0.289991
Fyb	-0.799746	0.266846	0.610975	-0.275301	0.772714	0.935224	-1.11416	0.216697	0.408973
Fyco1	-0.194127	0.770073	0.899059	-0.374454	0.563699	0.841361	-1.51657	0.0196797	0.0959158
Fyn	1.23943	0.062442	0.301064	1.72586	0.00750938	0.157854	1.867	0.000651239	0.0094018
Fyttd1	0.565202	0.356782	0.680704	0.484387	0.544036	0.830537	0.547811	0.332874	0.514889
Fzd1	1.4022	0.06765	0.313537	1.0411	0.153221	0.512506	0.194184	0.737974	0.835041
Fzd3	-1.19223	0.0889144	0.364956	-0.662853	0.358563	0.716349	-1.1061	0.0768518	0.223485
Fzd5	-0.551089	0.484374	0.747158	-0.33709	0.67469	0.898954	-0.982109	0.152548	0.332939
Fzd7	-0.270278	0.688002	0.855152	-0.9186	0.129893	0.477034	-0.969031	0.0899246	0.246068
Fzd8	-1.16591	0.0879449	0.363651	-1.15413	0.0725296	0.35865	-1.46171	0.0458952	0.166362
G2e3	0.278998	0.645734	0.832132	0.566535	0.335948	0.698293	0.168024	0.758933	0.848175
G3bp1	2.15789	0.0370228	0.234388	1.82672	0.0265314	0.231104	1.99744	0.00629559	0.0438075
G3bp2	1.48828	0.0380916	0.237712	0.467355	0.506428	0.814246	1.27132	0.024357	0.109748
Gab1	-0.163126	0.847039	0.937476	0.305234	0.602312	0.859603	-0.648906	0.26693	0.457563
Gabpa	1.58828	0.0450874	0.255504	1.15412	0.19705	0.57401	1.48942	0.0115395	0.0671778
Gabpb1	0.456079	0.485977	0.747534	1.22392	0.112483	0.446056	1.02867	0.0993602	0.259857
Gabpb2	-0.614131	0.432089	0.720722	-0.670797	0.378268	0.732904	-1.19282	0.0589255	0.191241
Gadd45a	1.97287	0.00805108	0.129745	3.54401	0.000455945	0.11887	4.06074	4.24913e-07	0.00019407
Galnt1	-0.305399	0.595285	0.803955	-0.287559	0.626865	0.875312	-0.213716	0.661021	0.783063
Galnt10	-0.764272	0.340608	0.673499	-0.172276	0.836829	0.949403	-0.488521	0.475613	0.639411
Galnt2	1.85925	0.0207296	0.184328	1.77887	0.0184359	0.199525	1.34531	0.0121323	0.0693724
Galnt4	0.122158	0.839308	0.932688	0.224989	0.720443	0.919609	-0.32266	0.592545	0.732696
Ganab	1.52489	0.0200579	0.180917	0.601567	0.316566	0.683634	1.55197	0.00906254	0.0574837
Ganc	-1.08578	0.109685	0.402451	-0.588623	0.394183	0.743623	-1.09587	0.116821	0.287537
Gapdh	0.0378647	0.964503	0.988256	-0.3859	0.595378	0.856757	0.754088	0.258745	0.450115
Gapvd1	0.245948	0.668409	0.844164	-0.435799	0.442682	0.777091	0.280993	0.584623	0.726477
Garem	-0.428187	0.556196	0.779885	-0.619722	0.469936	0.79339	-0.704274	0.302834	0.486705
Gas1	2.95827	0.00380516	0.107378	0.770579	0.263917	0.639595	-0.672472	0.264391	0.455366
Gas2l1	-0.0496465	0.956574	0.985844	-0.981095	0.13073	0.477727	-0.76234	0.132913	0.307677
Gas2l3	0.145221	0.81788	0.922068	0.624328	0.395457	0.74416	0.865198	0.154429	0.33435
Gas5	2.79719	0.0110671	0.144896	2.93818	0.00546021	0.147947	4.11965	7.06085e-05	0.00228745
Gas7	1.35942	0.10625	0.395264	0.805212	0.211948	0.586199	0.238926	0.662228	0.784307
Gata2	-0.240927	0.71269	0.864451	-0.147981	0.821326	0.948148	-0.937385	0.182907	0.370534
Gata3	-0.98814	0.276812	0.620978	-0.116488	0.912102	0.974426	-1.29657	0.0710138	0.214536
Gata6	-0.36868	0.656343	0.837684	-1.56942	0.0328794	0.257299	-0.845539	0.275454	0.464858
Gatad2a	-0.560056	0.383559	0.696328	-0.704805	0.212284	0.586199	0.713105	0.226372	0.41951
Gbf1	0.137682	0.877083	0.948442	-0.324554	0.657279	0.890416	0.287212	0.600762	0.73958
Gcc1	-0.420068	0.529248	0.76848	-0.0705973	0.934079	0.981554	-0.453793	0.379091	0.557999
Gcc2	1.62973	0.05521	0.281885	1.85028	0.0204564	0.209226	1.3723	0.0283815	0.122083
Gclc	1.45362	0.0261053	0.203971	2.57444	0.00148469	0.122393	2.25745	0.000224029	0.00453912
Gclm	1.51211	0.108103	0.399934	3.99943	0.00058413	0.11887	3.00683	7.84811e-05	0.002449
Gcm1	-1.34799	0.141902	0.45965	-0.332029	0.684786	0.903219	-1.89542	0.0360667	0.142564
Gcn1l1	-0.49223	0.543483	0.775114	-0.640105	0.453405	0.784133	-0.306025	0.585336	0.726901
Gcnt2	-1.21984	0.102241	0.388322	-0.38435	0.582303	0.847134	-0.817401	0.151349	0.332018
Gcnt4	-1.31128	0.0259393	0.203398	-1.25254	0.0559151	0.317062	-0.944572	0.0714264	0.215136
Gcsh	0.402886	0.594163	0.803304	0.384907	0.649089	0.887001	0.291113	0.726824	0.826146
Gdi2	2.64965	0.00526553	0.112331	2.00115	0.034737	0.263229	2.74976	0.000984041	0.0121163
Gdnf	-1.09962	0.103079	0.389669	0.0884503	0.883432	0.964971	-0.284537	0.596187	0.735932
Gdpgp1	-0.281976	0.766378	0.897729	-0.643546	0.42379	0.763112	-1.55927	0.0740294	0.219554
Gem	0.875916	0.170251	0.500653	0.970932	0.167369	0.535433	0.584583	0.335181	0.516708
Gemin4	-0.0278089	0.987831	0.997561	0.87397	0.243642	0.623475	0.0833734	0.897749	0.940623
Gemin5	-0.0822142	0.912946	0.965309	-0.465448	0.584407	0.848602	0.31233	0.598015	0.737825
Gen1	-0.369802	0.623517	0.818539	-1.41803	0.0808474	0.381387	-0.19628	0.802301	0.87797
Get4	0.660079	0.297397	0.640512	0.114216	0.862764	0.958723	0.00203748	1	1
Gfm1	2.26253	0.00538752	0.112331	1.87325	0.0183552	0.199525	2.42164	0.000477329	0.00740154
Gfpt1	0.250273	0.713607	0.864465	1.65088	0.0360358	0.267816	0.514352	0.298714	0.485676
Gga1	-1.10021	0.126558	0.434011	-1.08773	0.159294	0.52444	-0.255982	0.694738	0.805446
Gga2	-0.789062	0.222459	0.569055	-0.418495	0.499231	0.808829	-0.184559	0.718267	0.820734
Gga3	-1.37706	0.0472516	0.26087	-0.503939	0.577923	0.845052	-0.254998	0.734111	0.832357
Ggnbp2	1.86749	0.02328	0.1929	2.25525	0.0221346	0.215095	2.10799	0.000926375	0.0116697
Ggps1	0.664603	0.303112	0.642976	1.1577	0.0845	0.387913	0.922497	0.15054	0.330845
Ggta1	0.441201	0.462558	0.741747	-0.431342	0.515491	0.817495	0.0014464	1	1
Ghitm	2.56096	0.00483736	0.112331	2.69828	0.0149606	0.18745	2.97204	3.44535e-05	0.00164852
Gid4	1.04747	0.105013	0.394014	0.74546	0.251993	0.629109	0.719975	0.196309	0.383459
Gigyf1	-0.04152	0.977043	0.99416	-0.628336	0.399703	0.746786	-0.390685	0.529605	0.683075
Gigyf2	0.939842	0.147445	0.46802	0.412463	0.492861	0.80532	0.801821	0.125851	0.300491
Gimap1	-0.965626	0.365712	0.687909	-1.23396	0.110768	0.443072	-1.27335	0.196859	0.383936
Ginm1	1.63714	0.0570722	0.287845	1.8119	0.0277865	0.236143	1.37546	0.0597381	0.192758
Gins3	-0.908529	0.19451	0.535754	-1.13496	0.115733	0.451783	-0.645524	0.281072	0.470089
Gipc1	-0.625149	0.339458	0.673499	-0.660853	0.429857	0.769089	-0.558828	0.408529	0.583911
Git1	-0.212627	0.813627	0.920914	-0.418431	0.581777	0.846711	-0.072645	0.913608	0.951091
Git2	-0.2792	0.651997	0.83578	0.305242	0.60721	0.863106	0.124106	0.812158	0.884902
Gja1	0.445765	0.481603	0.746378	0.596083	0.394088	0.743623	0.715607	0.179565	0.366573
Gja8	-0.991082	0.321644	0.657838	-0.123494	0.884003	0.965065	-1.45778	0.124919	0.299139
Gjb3	-1.18847	0.195391	0.535829	-0.842646	0.269237	0.64318	-0.360335	0.728888	0.82793
Gjc1	0.878891	0.162623	0.488565	0.514764	0.415837	0.759626	0.70912	0.217063	0.409509
Gjc3	-0.566866	0.578851	0.794575	-0.530289	0.486578	0.801665	-1.67461	0.0689445	0.210948
Gla	1.70283	0.0730167	0.327133	1.83091	0.0463571	0.294934	1.42235	0.0529368	0.181536
Glb1l	0.131459	0.866857	0.945525	-0.961584	0.263446	0.639398	-0.925997	0.236321	0.429084
Gli2	-0.551242	0.477295	0.744885	-0.701352	0.2338	0.610504	-0.896612	0.244029	0.436024
Gli3	-0.599948	0.375745	0.693005	-1.2251	0.0377134	0.270289	-0.757272	0.143297	0.320966
Glis2	-0.715448	0.267301	0.610975	0.0433359	0.95803	0.990157	-0.180514	0.809651	0.882745
Glis3	-1.4102	0.0269099	0.205143	-0.715861	0.308902	0.676765	-1.04445	0.0549437	0.184517
Glo1	0.771788	0.20722	0.547934	0.989145	0.159147	0.524298	0.496984	0.364067	0.543761
Glrb	0.414441	0.561833	0.782526	-0.295412	0.718541	0.919609	-0.772107	0.219174	0.411791
Glrx2	0.170601	0.767663	0.898379	-0.885721	0.122101	0.462623	-0.753114	0.194434	0.381875
Gls	1.42872	0.0968261	0.381253	0.888537	0.252069	0.629109	0.467045	0.439222	0.610584
Glt25d1	0.680858	0.344126	0.673649	1.05554	0.170624	0.541854	0.639831	0.276597	0.466317
Gltscr1	-0.524772	0.55434	0.779022	-0.195253	0.807462	0.945395	-0.562207	0.541186	0.692718
Gltscr1l	0.0959062	0.871118	0.946679	0.13002	0.847091	0.95229	-0.430492	0.451476	0.620579
Gltscr2	1.06651	0.20082	0.540395	-0.63844	0.507283	0.814246	2.0904	0.00939206	0.0588351
Glud1	2.47985	0.0100344	0.138774	2.22767	0.0044505	0.13802	2.34361	0.000293721	0.00535979
Glyr1	1.78276	0.0550938	0.281885	2.04327	0.0156417	0.192419	1.37546	0.00956358	0.0596862
Gm10069	-0.640796	0.506283	0.756101	-0.29014	0.690333	0.905143	-0.696138	0.334105	0.515803
Gm10094	2.01158	0.0827223	0.352722	2.36466	0.023961	0.222926	1.45244	0.0556033	0.18595
Gm10653	-1.18039	0.14226	0.45997	-1.05229	0.0989458	0.419748	-0.880472	0.174458	0.359803
Gm10845	-1.04345	0.372509	0.689617	-0.810771	0.333354	0.695629	-1.36388	0.188607	0.376166
Gm11127	-0.988707	0.294413	0.636734	-0.106667	0.900233	0.97243	-1.7562	0.0375459	0.146452
Gm11602	-0.357021	0.755527	0.891583	0.210769	0.788949	0.940121	-1.98601	0.0319831	0.132183
Gm12070	-1.22505	0.0890329	0.365144	-0.270962	0.725425	0.921035	-0.972552	0.118213	0.289426
Gm12504	-0.898	0.296491	0.63987	-0.733653	0.393643	0.743623	-1.30809	0.105714	0.26905
Gm13242	-0.750186	0.372811	0.689617	-0.876037	0.177364	0.551249	-0.59818	0.445547	0.615799
Gm13247	-0.387186	0.672814	0.847384	0.198154	0.838414	0.949958	-1.01074	0.278752	0.468143
Gm13363	1.16062	0.164295	0.490443	0.798963	0.269137	0.64318	1.92272	0.0116563	0.0673893
Gm13399	-1.11465	0.30339	0.642976	-0.425372	0.618558	0.869414	-0.923094	0.289355	0.477323
Gm14124	-1.34661	0.0786786	0.340816	0.117219	0.856083	0.955814	-0.59287	0.485334	0.647456
Gm14295	0.887991	0.236301	0.588696	0.691895	0.303735	0.672527	-0.219506	0.72479	0.824273
Gm14322	-0.227614	0.702965	0.859084	0.745961	0.339865	0.700757	-0.38977	0.464843	0.629142
Gm14325	-0.237695	0.707799	0.861848	0.868868	0.160514	0.525845	0.0249853	0.959853	0.980142
Gm14326	0.541659	0.417061	0.716937	1.19041	0.145124	0.500223	0.451783	0.450325	0.620014
Gm14403	0.0961977	0.877709	0.948915	-0.75652	0.286658	0.657941	-0.562445	0.360598	0.540145
Gm14420	-0.372185	0.662413	0.840819	-0.167065	0.821035	0.948148	-0.759059	0.297363	0.484107
Gm14436	-1.08451	0.123449	0.428025	-1.28173	0.104997	0.431404	-1.35514	0.081236	0.230843
Gm14872	-1.69269	0.0759419	0.33528	0.381095	0.618563	0.869414	-1.13711	0.152841	0.332996
Gm15446	-0.724044	0.413285	0.715355	-0.349459	0.669759	0.897299	-0.902667	0.283883	0.472417
Gm1564	-1.24156	0.189053	0.528866	-0.90117	0.186058	0.564124	-1.95129	0.0162328	0.0842498
Gm15645	-0.345968	0.666219	0.843519	0.556679	0.467399	0.79225	0.823588	0.273769	0.463415
Gm15760	-0.763122	0.464212	0.741794	0.0626083	0.942534	0.984086	-1.60151	0.125754	0.300422
Gm15800	-0.697883	0.293034	0.635118	-0.187734	0.839356	0.949958	-0.480079	0.38234	0.561332
Gm15910	-1.52241	0.126133	0.433144	-0.516775	0.574877	0.845052	-1.80612	0.0575868	0.189219
Gm16325	-1.37413	0.153928	0.475022	-0.710889	0.341603	0.701927	-2.38788	0.0130808	0.0726599
Gm16515	-0.754469	0.358383	0.68166	-0.830595	0.24618	0.626866	-0.92334	0.177614	0.363921
Gm16516	0.491175	0.504468	0.756101	0.67346	0.33622	0.698293	-0.585977	0.430993	0.603486
Gm16576	-0.620559	0.509218	0.757199	-0.231284	0.787816	0.940121	-0.441205	0.641253	0.768341
Gm16702	-0.168267	0.827518	0.926586	0.314977	0.679434	0.900178	0.303572	0.656176	0.779529
Gm17644	-0.964698	0.413087	0.715355	-0.68483	0.416618	0.759863	-1.21115	0.234095	0.426688
Gm17821	-0.926921	0.434547	0.723141	-0.645507	0.451721	0.783724	-1.28272	0.230781	0.423928
Gm19757	-0.954651	0.427621	0.717713	-1.01379	0.230656	0.606709	-1.43261	0.188376	0.376166
Gm20199	-0.720362	0.448361	0.733495	-0.995794	0.249773	0.627904	-0.705195	0.528769	0.682564
Gm20337	-0.800271	0.49274	0.751041	-0.390939	0.662136	0.891125	-2.01342	0.047897	0.170794
Gm20554	-0.932061	0.220237	0.567422	-0.266057	0.744108	0.927289	-1.52415	0.0851667	0.238239
Gm2381	-0.576228	0.400622	0.70746	-0.622707	0.336052	0.698293	-0.522184	0.522956	0.678439
Gm3002	-0.97158	0.377804	0.694525	-0.814621	0.333668	0.695869	-1.27099	0.191816	0.379201
Gm3414	-0.725236	0.260689	0.605503	-0.614137	0.298619	0.667589	-0.553867	0.35335	0.532782
Gm3893	-1.19458	0.30952	0.645623	-0.991349	0.209074	0.584507	-1.50977	0.164812	0.347323
Gm4262	-1.04416	0.147537	0.46802	-0.941662	0.139046	0.492829	-1.1585	0.12629	0.30071
Gm4636	-0.443575	0.492299	0.751041	-0.573006	0.390093	0.742077	-0.808249	0.191865	0.379201
Gm4841	-0.956817	0.35307	0.67742	-0.213096	0.780313	0.937645	-1.11331	0.241228	0.434228
Gm4944	-0.519795	0.534886	0.770944	-0.123353	0.868335	0.960556	-0.886552	0.223419	0.416133
Gm5069	-0.602424	0.563515	0.783389	-1.07226	0.0676152	0.343569	-1.21044	0.191139	0.379087
Gm5113	-0.396665	0.642717	0.829867	-0.508236	0.487556	0.801665	-1.29374	0.102247	0.264106
Gm5531	-1.13618	0.105729	0.395264	-0.836607	0.213985	0.588028	-0.616443	0.379175	0.557999
Gm5595	-1.07989	0.108246	0.400111	-0.0867416	0.914882	0.97451	-0.399879	0.587103	0.728105
Gm608	-0.505572	0.453644	0.737336	-0.591335	0.375318	0.73109	-0.580663	0.296773	0.483773
Gm6548	-0.0876613	0.938463	0.976763	-0.50424	0.546566	0.831098	-1.05757	0.125411	0.300031
Gm6793	2.19887	0.0281163	0.207208	1.35336	0.11064	0.443072	1.02529	0.13386	0.308776
Gm7102	-1.21511	0.278303	0.621697	-0.861101	0.3219	0.688583	-1.33907	0.17955	0.366573
Gm7120	-1.0416	0.194762	0.535829	-0.483627	0.521537	0.821379	-1.25653	0.0763831	0.22298
Gm7609	-0.704578	0.560873	0.782526	-0.701576	0.413413	0.758156	-1.31181	0.215956	0.40788
Gm9159	-0.966433	0.40286	0.710165	-1.08372	0.199607	0.574027	-1.31644	0.212055	0.403241
Gmcl1	0.284463	0.674204	0.848073	-0.229284	0.808423	0.945857	-0.442361	0.502647	0.661247
Gmeb1	0.143056	0.848488	0.937476	0.410308	0.581578	0.846711	0.762071	0.233635	0.426247
Gmeb2	-0.407832	0.650528	0.835087	0.332922	0.617099	0.868966	-0.256083	0.725843	0.825217
Gmps	1.35595	0.0716975	0.323928	0.784687	0.4371	0.772134	2.10294	0.00144902	0.0155886
Gna11	0.685123	0.324706	0.659783	0.389426	0.57947	0.845333	1.40445	0.0240487	0.108835
Gna13	-0.0394957	0.95559	0.985563	-0.0536946	0.936093	0.982028	-0.034192	0.951116	0.974099
Gna14	-0.786073	0.36969	0.689167	-0.734321	0.331098	0.694255	-1.80713	0.0595404	0.192367
Gnai2	2.43985	0.00337483	0.107378	1.55525	0.0982737	0.418767	2.25342	0.00112978	0.0132618
Gnai3	2.301	0.0164627	0.167659	1.92386	0.0718223	0.356557	1.62037	0.00671986	0.046121
Gnal	-0.399121	0.545116	0.77578	0.298553	0.666275	0.89454	-1.32075	0.0788659	0.226572
Gnao1	-0.637612	0.365823	0.687909	-0.584576	0.388498	0.741135	-1.03572	0.053707	0.182513
Gnaq	0.118673	0.84846	0.937476	0.461517	0.465756	0.792216	0.395997	0.456293	0.624187
Gnas	2.08785	0.065091	0.307926	2.40516	0.0240134	0.223	2.05975	0.0113016	0.0662533
Gnb1	2.8448	0.0129168	0.156749	2.67689	0.00525728	0.1449	2.9415	0.0011946	0.013797
Gng12	1.62275	0.0541528	0.279039	1.26121	0.16512	0.531892	1.54171	0.0143463	0.0771689
Gng2	-0.620343	0.443642	0.729831	-0.574729	0.559515	0.837856	-2.20819	0.00177346	0.0181834
Gng5	2.20407	0.035404	0.228038	2.50054	0.0134622	0.182229	1.97	0.00332871	0.0277338
Gng7	-0.758858	0.340762	0.673499	0.107986	0.889985	0.968859	-1.45784	0.0969783	0.256517
Gnl3l	0.975624	0.175139	0.508908	0.812587	0.248795	0.627904	0.664122	0.289229	0.477323
Gnpda2	1.09584	0.185802	0.524928	1.12054	0.279051	0.648772	0.327947	0.657616	0.780802
Gnptab	1.38021	0.0468719	0.260492	0.393924	0.580284	0.845763	1.22817	0.0144139	0.0772844
Gnptg	0.765407	0.27814	0.621608	2.00215	0.0140328	0.183047	1.21029	0.0807078	0.230122
Gns	1.49945	0.0667336	0.311515	0.605701	0.344104	0.702599	1.72544	0.0169345	0.0871709
Golga2	0.644915	0.333766	0.666737	0.64241	0.313354	0.680332	0.573217	0.311339	0.494207
Golga3	1.52423	0.0314536	0.217067	0.647566	0.410009	0.755921	1.63892	0.0113175	0.0662692
Golga4	0.983698	0.137006	0.451025	0.745403	0.264924	0.640414	1.51584	0.0131081	0.0726599
Golga5	0.126378	0.87881	0.949493	0.483313	0.482519	0.801036	0.224486	0.742751	0.838558
Golga7	0.237048	0.747432	0.886891	0.707838	0.333006	0.695629	0.148412	0.826725	0.893603
Golga7b	-0.976963	0.305331	0.644231	0.150422	0.843049	0.950512	-1.4963	0.119658	0.291542
Golgb1	0.578337	0.421641	0.717228	0.481574	0.485617	0.801516	0.905719	0.132643	0.307664
Golim4	1.44128	0.138132	0.452948	1.93148	0.0251543	0.226944	1.68136	0.0194234	0.0949253
Golph3	2.80423	0.000271036	0.102938	1.99803	0.00572746	0.149508	2.91571	1.81891e-05	0.00111441
Gopc	-0.560355	0.348022	0.674302	-0.0780217	0.900978	0.972607	-0.616112	0.24329	0.435598
Gorab	1.48072	0.0314853	0.217067	1.7343	0.0159595	0.192742	1.45975	0.0139186	0.0755968
Gorasp2	1.63363	0.0408434	0.243336	1.17936	0.134417	0.485834	2.46646	0.000790331	0.0105883
Got1	1.9619	0.0282243	0.207208	2.52123	0.00271553	0.122393	2.2658	0.00109002	0.0130077
Gpatch4	1.72304	0.0155973	0.165466	2.62864	0.000129018	0.11887	2.11674	0.000548365	0.00815084
Gpatch8	0.257712	0.679316	0.85046	-0.0839615	0.893763	0.969762	-0.0427296	0.928495	0.96042
Gpbp1	1.11683	0.0987946	0.383809	1.15402	0.109211	0.440348	1.08306	0.059043	0.191376
Gpc1	-0.699816	0.346177	0.673649	-0.572492	0.510196	0.815402	0.163815	0.794047	0.872357
Gpc6	-0.603527	0.343887	0.673649	-0.115685	0.879481	0.96432	-0.728666	0.220638	0.413177
Gpcpd1	0.0502146	0.948279	0.981253	-0.649357	0.391004	0.742321	0.561898	0.306288	0.490216
Gpd2	0.677633	0.289541	0.63136	-0.0525068	0.939856	0.983516	0.510269	0.314887	0.497639
Gpi1	1.57704	0.0838673	0.354392	0.650375	0.343558	0.702599	2.69518	0.00331421	0.0277048
Gpkow	0.373769	0.525243	0.766105	1.0607	0.0706101	0.352823	0.616813	0.242557	0.434687
Gpnmb	-1.44937	0.0885793	0.364434	-0.733431	0.394313	0.743623	-0.836801	0.206314	0.396072
Gpr107	-0.0295071	0.991381	0.998336	0.240613	0.752921	0.930441	0.325261	0.609828	0.745655
Gpr125	0.698285	0.236821	0.589287	0.601527	0.442242	0.777039	1.25067	0.0210903	0.0994707
Gpr126	-1.43839	0.0621688	0.300035	-0.537014	0.426858	0.765905	-2.16533	0.0149693	0.0799211
Gpr149	0.349496	0.562893	0.783155	-0.447048	0.483066	0.801036	-0.269125	0.648908	0.774006
Gpr153	-0.670524	0.459672	0.741722	0.51117	0.530837	0.82553	-1.25643	0.105509	0.268667
Gpr176	-0.618544	0.310264	0.645988	0.755775	0.314115	0.681102	-0.880832	0.147759	0.327455
Gpr39	-1.17061	0.163246	0.489056	0.12859	0.865213	0.959142	-2.08629	0.0271292	0.118622
Gpr85	0.465905	0.453201	0.736854	-0.824065	0.258414	0.635162	-0.740235	0.237778	0.43095
Gprasp1	0.0423551	0.941392	0.97782	-0.383591	0.603796	0.86056	-0.502117	0.396031	0.572565
Gprc5b	-0.516651	0.417405	0.716937	-0.722593	0.208027	0.583218	-0.234945	0.629723	0.759009
Gpsm2	1.58032	0.0547206	0.2811	1.72746	0.0170725	0.195125	0.783622	0.171677	0.356259
Gpx7	0.579609	0.430737	0.719753	0.686616	0.346075	0.703351	-0.464724	0.439178	0.610584
Grb10	1.86465	0.0402542	0.24191	1.31331	0.0915773	0.407154	1.93358	0.0105736	0.0636953
Greb1l	-0.972558	0.322634	0.657985	-0.578769	0.450336	0.783681	-1.00789	0.293305	0.480309
Grem2	0.697425	0.335788	0.668914	1.23295	0.0567403	0.31873	1.63526	0.00965303	0.0597646
Grik2	0.10545	0.870664	0.946679	-0.401139	0.536952	0.828315	-0.695973	0.227276	0.420359
Grik5	-1.28522	0.21292	0.558012	-1.30949	0.0753947	0.367487	-1.60061	0.079384	0.22751
Grin3a	-1.89713	0.0440127	0.252708	-2.37717	0.00194229	0.122393	-2.0517	0.0264116	0.116091
Gripap1	0.202189	0.84846	0.937476	0.181246	0.846273	0.951584	0.651672	0.401765	0.577034
Grk1	-0.96074	0.416136	0.716937	-0.779489	0.353895	0.711472	-1.15633	0.261367	0.452685
Grk4	-0.802844	0.438588	0.726977	-0.455651	0.653945	0.889267	-1.58591	0.0842446	0.236318
Grk5	-0.78921	0.272471	0.617174	-1.1824	0.104657	0.430629	-1.18312	0.0868892	0.241311
Grk6	-0.191088	0.814776	0.921529	-0.200938	0.828992	0.948805	-0.0962673	0.910444	0.949521
Grlf1	0.469971	0.528344	0.767834	0.267069	0.701095	0.909685	1.01402	0.109468	0.276089
Grn	2.67959	0.0017546	0.102938	0.863559	0.391818	0.742321	2.56288	0.00175306	0.018011
Grpel1	0.290778	0.627147	0.820572	0.943795	0.13089	0.477727	0.485687	0.367509	0.546909
Grpel2	-0.0957602	0.912343	0.965309	0.297549	0.706006	0.913299	-0.244165	0.707019	0.814133
Grsf1	1.20551	0.0874709	0.362885	1.35882	0.0835708	0.387324	1.69595	0.00222155	0.0210586
Gse1	-0.932789	0.19595	0.535829	-1.64094	0.00528493	0.1449	-1.13146	0.0458872	0.166362
Gsg2	-0.100668	0.912636	0.965309	-0.325287	0.723747	0.920665	-0.379579	0.565253	0.712289
Gsk3a	0.546396	0.407733	0.713364	0.212089	0.769441	0.933963	0.593922	0.394124	0.571452
Gsk3b	-0.0832769	0.889748	0.955149	-0.46878	0.422238	0.762949	0.37263	0.470875	0.635081
Gskip	0.276817	0.698449	0.857319	0.492912	0.487592	0.801665	-0.136587	0.861791	0.916713
Gsn	2.12179	0.0175206	0.171904	1.05854	0.212199	0.586199	1.8851	0.00573317	0.0404543
Gspt1	1.17425	0.157572	0.481916	0.156638	0.822327	0.948349	0.776043	0.226106	0.419172
Gsr	0.908011	0.257846	0.603714	0.612598	0.522931	0.821625	1.5993	0.0339023	0.137581
Gstcd	0.151832	0.845705	0.936483	0.165547	0.804507	0.944712	0.274934	0.669116	0.788388
Gt(ROSA)26Sor	1.19891	0.0827745	0.352722	1.96756	0.0104395	0.170226	0.074248	0.905208	0.945946
Gtdc1	-0.868384	0.384062	0.696328	-0.451069	0.578906	0.845333	-1.1262	0.199749	0.387916
Gtf2a1	0.51846	0.397912	0.705901	-0.597611	0.333205	0.695629	0.535584	0.27163	0.461662
Gtf2e1	0.219835	0.746534	0.886664	0.817993	0.20207	0.576766	0.973549	0.103249	0.265044
Gtf2h3	0.200085	0.771305	0.89908	0.795453	0.266442	0.642942	-0.754186	0.298814	0.485681
Gtf2ird1	0.137821	0.850911	0.938817	1.3262	0.0918912	0.407468	0.642528	0.236701	0.429309
Gtf2ird2	-0.804191	0.299107	0.641911	-0.0681444	0.942458	0.984086	-1.43552	0.0557549	0.186121
Gtf3c2	-0.0302396	0.96039	0.986909	0.104539	0.911097	0.974426	-0.00944294	0.986134	0.994647
Gtf3c3	0.903272	0.157993	0.48194	0.803105	0.226099	0.601652	1.05924	0.0536503	0.182491
Gtf3c4	0.210657	0.73572	0.879014	0.320904	0.605164	0.861531	0.63736	0.213634	0.40517
Gtpbp10	-0.826558	0.175748	0.508908	0.780809	0.188164	0.56607	-0.844532	0.174551	0.359846
Gtpbp3	-1.10083	0.136292	0.449882	-0.197779	0.797889	0.942534	-0.584363	0.375246	0.554807
Gtse1	1.14917	0.0992882	0.384302	2.52428	0.0118646	0.176438	2.03971	0.000778064	0.0105883
Gucy1a2	-0.739058	0.299351	0.641983	-0.107896	0.879387	0.96432	-0.919474	0.126352	0.30071
Guf1	0.0341922	0.981467	0.995938	0.188046	0.778922	0.937421	0.0706632	0.914373	0.951493
Gxylt1	-0.142343	0.805999	0.917177	-0.108483	0.865651	0.959204	0.244607	0.632547	0.760631
H13	-0.416667	0.507478	0.756101	-0.289461	0.6763	0.898954	-0.366305	0.465009	0.629196
H1f0	0.620325	0.368529	0.688798	-0.301994	0.599213	0.859145	-0.0935693	0.846533	0.907245
H2-Q4	-0.91551	0.448015	0.733168	-0.839776	0.323834	0.690259	-1.39979	0.184294	0.372025
H2-T23	0.444405	0.564413	0.783402	0.517879	0.520636	0.82099	-0.263541	0.738526	0.835389
H2afj	-0.780704	0.240543	0.590105	-0.590131	0.482256	0.801036	-0.419664	0.533839	0.685936
H2afz	3.27783	0.012588	0.154627	2.79552	0.0251161	0.226944	2.20062	0.00504233	0.0369977
H3f3a	2.16385	0.0390255	0.239394	2.07709	0.0459814	0.293906	0.659711	0.36184	0.54136
H3f3b	3.08934	0.00810441	0.129745	2.82489	0.0064029	0.152456	3.00472	0.000129633	0.0033022
H6pd	0.00565571	0.993114	0.999229	-0.775998	0.303428	0.672283	-0.0556417	0.94855	0.973081
Hadh	1.69989	0.0861225	0.358773	2.49841	0.000780632	0.11887	1.85201	0.00323047	0.0271857
Hadha	0.754674	0.311998	0.647717	-0.107857	0.874323	0.962445	0.500942	0.350215	0.530027
Hadhb	1.14543	0.0837913	0.354392	0.862116	0.197894	0.57401	0.0854632	0.866735	0.920866
Harbi1	-1.47889	0.103817	0.391868	0.0777889	0.910547	0.974426	-1.64427	0.0611069	0.195268
Has2	-0.575751	0.464114	0.741794	0.243665	0.698149	0.907947	0.263514	0.614247	0.749569
Haus2	-0.849749	0.210938	0.555427	-0.143732	0.857455	0.955814	-0.214187	0.741021	0.836981
Haus3	1.72186	0.0748263	0.331798	2.79021	0.0254358	0.227789	2.09016	0.00418531	0.0325099
Hax1	1.6909	0.0157357	0.166084	1.45855	0.0417275	0.283726	1.94266	0.00425286	0.0327203
Hbs1l	-0.357594	0.532729	0.770241	-0.75824	0.223699	0.59926	0.0990077	0.847884	0.907879
Hcfc2	-0.362528	0.64024	0.828159	-0.911637	0.280092	0.65027	-0.665955	0.38717	0.565284
Hdac1	0.203223	0.747349	0.886891	-0.404362	0.612278	0.866015	0.360528	0.485802	0.647736
Hdgf	1.40473	0.0579586	0.288546	0.507042	0.48114	0.801036	2.35785	0.00155104	0.0164745
Hdgfrp3	1.23866	0.0835901	0.354392	1.58031	0.0455661	0.292741	0.960978	0.0828881	0.233641
Hdhd2	0.838983	0.14982	0.470138	0.761117	0.211619	0.586199	-0.377566	0.496257	0.655932
Hdhd3	-0.206171	0.838384	0.932074	-0.111556	0.90073	0.972607	-1.61091	0.0691001	0.21104
Hdlbp	1.76351	0.0439548	0.252708	1.35139	0.102589	0.424976	2.74571	0.000809009	0.010696
Heatr2	-0.140017	0.879573	0.950021	-0.76359	0.280056	0.65027	0.161781	0.818459	0.888876
Heatr5a	0.180773	0.759979	0.894505	0.170282	0.786944	0.940121	0.36937	0.472572	0.636659
Heatr5b	-0.250027	0.701698	0.85858	0.182725	0.80426	0.944712	-1.01589	0.105179	0.268136
Heca	-0.0927596	0.89341	0.956087	-0.213186	0.751906	0.930441	-0.338733	0.569048	0.714898
Hectd1	2.07005	0.0181359	0.173648	1.73805	0.0393082	0.274725	2.154	0.00129347	0.0144895
Hectd3	-1.12279	0.100694	0.387921	-0.507077	0.428014	0.767659	-1.54919	0.0127451	0.0713839
Hecw2	-0.947543	0.32092	0.657545	-1.36634	0.0394151	0.274725	-1.23753	0.13623	0.311575
Heg1	0.773321	0.255137	0.601224	-0.381006	0.574048	0.845052	0.190418	0.719094	0.821074
Helz	0.372662	0.549665	0.776965	0.709073	0.235893	0.61426	-0.0623158	0.910629	0.949521
Helz2	-0.884724	0.287282	0.629988	-0.450611	0.561714	0.839646	-1.00835	0.117787	0.288664
Herc2	0.116989	0.853137	0.939785	-0.0274619	0.970632	0.993804	0.836814	0.163446	0.345311
Herc3	-1.94018	0.00788865	0.129745	-0.872471	0.25003	0.628075	-1.70711	0.0228598	0.104788
Herc4	0.737843	0.238785	0.589455	0.956904	0.145766	0.500223	1.1982	0.0367029	0.144284
Herpud2	1.06233	0.0930544	0.374304	0.72619	0.241478	0.620656	0.510463	0.354039	0.533341
Hgsnat	-0.0339905	0.959417	0.986111	0.0210599	0.985491	1	1.00545	0.17396	0.35951
Hic1	-1.13432	0.118653	0.418956	-1.4667	0.0530513	0.310279	-1.58911	0.0229888	0.105092
Hif1a	1.82742	0.0433314	0.251092	1.95935	0.0231094	0.221047	1.95259	0.00332262	0.027729
Hif1an	-0.538764	0.513857	0.759914	-1.38745	0.0173411	0.195779	-0.863079	0.129199	0.303741
Hip1	-0.763637	0.224979	0.572012	-1.46203	0.0113694	0.173443	-0.728969	0.18643	0.374351
Hipk1	0.509444	0.497342	0.753073	0.45825	0.53242	0.825978	1.31576	0.0374515	0.146198
Hipk2	0.930085	0.128221	0.43596	0.569654	0.493356	0.80551	0.662446	0.227346	0.420359
Hipk3	0.80161	0.316857	0.653604	0.416671	0.534629	0.827983	1.16906	0.0301774	0.127084
Hira	-0.701874	0.421421	0.717228	-0.485635	0.540819	0.828962	0.313073	0.568392	0.71472
Hist4h4	-1.05965	0.363122	0.685578	-0.566487	0.480385	0.801036	-1.22033	0.244079	0.436024
Hivep1	-0.651545	0.310044	0.645796	-0.839449	0.178441	0.552705	-0.389215	0.473638	0.637438
Hivep2	-0.375315	0.64231	0.829767	-1.29306	0.0435639	0.28874	-0.79279	0.132053	0.30727
Hivep3	-0.80138	0.307494	0.644989	-1.31899	0.144097	0.500223	-1.0245	0.184355	0.372025
Hjurp	-0.79538	0.350513	0.675739	-0.870965	0.311426	0.678135	-1.14059	0.0928102	0.251228
Hlf	-0.136405	0.84285	0.93497	-0.284527	0.638964	0.881761	-1.40801	0.045067	0.164787
Hltf	-0.540676	0.335585	0.668774	-0.540564	0.347398	0.704899	-0.644691	0.171504	0.356048
Hmbs	0.640286	0.378423	0.694525	0.949048	0.183467	0.56188	0.273908	0.67029	0.789241
Hmcn1	-0.560609	0.555206	0.779885	-0.705977	0.340543	0.700757	-1.31174	0.122632	0.29613
Hmg20a	0.179377	0.770214	0.899059	0.60038	0.391536	0.742321	-0.336041	0.539402	0.690787
Hmga2	2.17895	0.030746	0.215737	1.62813	0.0909742	0.405093	1.71132	0.0214745	0.100361
Hmgb1	1.44745	0.124555	0.430386	0.724738	0.350316	0.707959	0.180042	0.781155	0.862912
Hmgb2	2.06244	0.0330443	0.221353	1.09148	0.28062	0.650594	1.24199	0.0540294	0.18279
Hmgb3	0.605103	0.325088	0.659783	1.12555	0.0601086	0.325415	-0.905828	0.114678	0.284937
Hmgcr	1.66035	0.0382995	0.238135	1.50665	0.0317487	0.253586	2.49085	0.00358105	0.0292065
Hmgcs1	3.13895	0.00390166	0.107378	1.80946	0.0263803	0.231104	3.18152	0.000235596	0.0046784
Hmgn1	2.47356	0.0194846	0.178409	2.57699	0.0119596	0.177242	2.26024	0.00224014	0.0211948
Hmgn2	0.929241	0.251812	0.600429	-0.13927	0.828321	0.948805	-0.0332364	0.948676	0.973081
Hmgxb3	0.599678	0.353272	0.67742	0.075291	0.90894	0.974426	0.240114	0.685348	0.798142
Hmmr	2.27165	0.0162849	0.167177	1.84627	0.0273754	0.233901	1.42725	0.00837582	0.0540876
Hn1l	1.74492	0.0613243	0.29755	0.999156	0.274973	0.645711	1.27285	0.0509659	0.177106
Hnrnpa0	2.9772	0.00534694	0.112331	2.08604	0.0199099	0.206242	1.21786	0.0441662	0.162653
Hnrnpa2b1	4.06982	0.00351741	0.107378	3.37142	0.0068333	0.156585	3.316	0.000386556	0.00638834
Hnrnpa3	1.76734	0.0642511	0.305967	1.63408	0.0824082	0.384235	0.737999	0.242272	0.434687
Hnrnpab	3.01385	0.00541086	0.112331	2.07308	0.0300072	0.246737	3.26064	0.000174005	0.00405351
Hnrnpc	1.6608	0.0343376	0.225669	1.12546	0.11123	0.443859	2.16477	0.00234007	0.0217713
Hnrnpd	1.14201	0.16201	0.487879	0.536319	0.422586	0.762949	1.3798	0.0372884	0.145788
Hnrnpf	2.67141	0.0120783	0.150965	2.0526	0.0336564	0.259738	2.07856	0.00358764	0.0292128
Hnrnph1	3.79148	0.00140062	0.102938	2.76898	0.00826061	0.159504	3.86397	2.72582e-05	0.00142651
Hnrnph2	1.44722	0.0603298	0.294075	0.89666	0.108563	0.440211	0.714397	0.177973	0.364507
Hnrnpk	2.43941	0.0147939	0.163913	1.59929	0.0824386	0.384235	2.23101	0.00268363	0.0239477
Hnrnpm	2.7078	0.0326304	0.220343	3.36059	0.0126969	0.180114	3.02866	0.000789625	0.0105883
Hnrnpr	2.04802	0.0272348	0.205641	1.81876	0.0175127	0.196611	1.23971	0.0421682	0.157517
Hnrnpu	3.47846	0.00506359	0.112331	2.9501	0.00282584	0.122393	3.26465	0.000128645	0.0033022
Hnrnpul1	0.20576	0.77071	0.899059	0.00477768	1	1	0.895733	0.189642	0.377481
Hnrnpul2	0.725471	0.303909	0.642976	0.431073	0.496946	0.806797	1.22541	0.0750876	0.220957
Hnrpdl	2.40493	0.0192609	0.17788	2.83448	0.00680509	0.156585	2.81589	0.000114881	0.00305377
Hnrpll	1.46756	0.0533468	0.276735	1.30625	0.0694191	0.349111	1.17324	0.0657313	0.204454
Homer1	0.094267	0.87659	0.948442	-0.232075	0.724667	0.920757	-0.464177	0.424123	0.597699
Homer2	-0.930193	0.335148	0.668167	-0.243282	0.746834	0.928736	-0.814576	0.414727	0.589908
Homer3	-0.220253	0.835014	0.9305	-0.0281584	1	1	0.844573	0.291975	0.479374
Hook1	-1.75944	0.038755	0.238727	-1.24219	0.167429	0.535433	-2.28063	0.0199076	0.0966335
Hook3	0.55546	0.478011	0.744886	0.450883	0.539338	0.828962	0.663287	0.266336	0.457148
Hoxa10	-0.444962	0.63683	0.826513	-0.340301	0.618356	0.869414	-1.53883	0.0590193	0.191376
Hoxa2	0.101828	0.891585	0.955343	-0.447655	0.617169	0.868966	-0.598512	0.496153	0.655932
Hoxd8	1.44957	0.0901978	0.368418	2.20965	0.0230588	0.221047	0.406725	0.619992	0.752559
Hp1bp3	1.6429	0.0281486	0.207208	1.06054	0.246919	0.627141	1.37128	0.0279744	0.121095
Hps3	0.0474912	0.938862	0.976932	0.149879	0.795443	0.941884	-0.432115	0.472806	0.636659
Hps5	-0.544933	0.34289	0.673649	0.275802	0.660204	0.890416	-0.219465	0.680678	0.796201
Hrsp12	1.69594	0.0213843	0.186843	1.72816	0.0107487	0.170359	0.272302	0.69675	0.806304
Hs2st1	1.01503	0.130834	0.440262	0.727758	0.27065	0.643552	0.770169	0.138938	0.315849
Hs6st1	-0.251682	0.684359	0.853791	-0.0543696	0.946481	0.985518	-0.350944	0.533551	0.685936
Hs6st2	-0.016293	0.9787	0.99416	-0.0832389	0.893633	0.969762	-0.203088	0.694529	0.805446
Hsd17b7	1.71728	0.018033	0.173257	1.95255	0.0113237	0.173443	1.55023	0.00723743	0.0488065
Hsdl2	0.307508	0.658142	0.839001	0.790815	0.255884	0.63297	-0.517172	0.426645	0.599738
Hsf2	0.198966	0.775546	0.901932	0.523421	0.408402	0.754611	1.58789	0.0156427	0.0822061
Hsp90aa1	3.15803	0.00824746	0.129745	4.31515	0.000252655	0.11887	5.97305	6.85065e-10	1.72088e-06
Hsp90ab1	3.01746	0.0329399	0.221137	3.72712	0.00277078	0.122393	5.04789	2.47963e-06	0.000519069
Hsp90b1	4.3652	0.00430748	0.112252	4.0534	0.00248784	0.122393	4.15325	1.42725e-05	0.000999432
Hspa12a	-1.25038	0.121842	0.425388	-0.913312	0.237724	0.616268	-1.07856	0.171033	0.355363
Hspa13	-0.300973	0.694851	0.856211	-0.815	0.306067	0.674259	-0.3968	0.511986	0.670197
Hspa1b	1.62119	0.0346108	0.226518	5.10753	6.89591e-05	0.115483	7.55165	5.58026e-14	2.80352e-10
Hspa2	-0.332926	0.623997	0.818559	0.342023	0.616832	0.868966	0.0863432	0.887965	0.934074
Hspa4	2.67149	0.0280956	0.207208	2.10867	0.0168394	0.195125	3.36708	4.33773e-05	0.00184178
Hspa4l	2.9234	0.00060262	0.102938	2.72212	0.00465477	0.140561	4.00268	5.79953e-07	0.000224129
Hspa5	3.00447	0.00670131	0.122487	2.5199	0.0237848	0.222926	4.16572	6.00375e-06	0.00065334
Hspa8	3.80169	0.00191203	0.102938	3.54004	0.000731358	0.11887	6.56546	9.03991e-09	1.13541e-05
Hspa9	3.88051	0.000779328	0.102938	2.66076	0.011018	0.171376	3.89943	1.01423e-05	0.000843802
Hspb8	1.1104	0.0943325	0.37733	1.71442	0.05104	0.307577	2.82882	6.68384e-05	0.00223864
Hspd1	3.16601	0.0102247	0.139763	3.49952	0.00212185	0.122393	4.49525	5.23291e-07	0.000219084
Hspg2	0.539496	0.543158	0.775114	-0.204967	0.719774	0.919609	1.67285	0.0225517	0.104328
Hsph1	2.42098	0.00291489	0.107378	3.44978	0.000342351	0.11887	6.47915	3.76526e-09	6.30555e-06
Htatsf1	1.46337	0.0883841	0.364322	1.45012	0.136594	0.488637	1.2806	0.0269003	0.117929
Htt	-0.376289	0.579628	0.795426	-0.829661	0.184299	0.562649	-0.389316	0.450758	0.620145
Hus1	-0.0474336	0.955745	0.985563	0.720485	0.330016	0.693434	0.453976	0.542931	0.694598
[truncated: 3,025 more rows]
