# Supplementary material for: Distinct transcriptional responses elicited by unfolded nuclear or cytoplasmic protein in mammalian cells
Source: eLife. 2015 Aug 28;4:e07687. doi: 10.7554/eLife.07687 (PMC4566031; doi:10.7554/eLife.07687)
Supplement: Supplementary file 6. — List of primers used in RT-qPCR experiments in this paper. DOI: http://dx.doi.org/10.7554/eLife.07687.022 [file elife07687s006.xlsx]

## Sheet: Summary
List of primers used in RT-qPCR experiments in this paper.
F = Forward primer and R = Reverse primer.

## Sheet: primers
RTPCR 4632434I11Rik F	ACTGTATTTGGGAGCTGCTTAGA
RTPCR 4632434I11Rik R	GGTCAGTAGGCTCTGAGTTCT
RTPCR 6530418L21Rik F	GCAAGGACATGGACTGCTATC
RTPCR 6530418L21Rik R	GCCGTCTGCACTTGTAGGA
RTPCR Bag3 F	CTGGGAGATCAAAATCGACCC
RTPCR Bag3 R	GCTGAAGATGCAGTGTCCTTAG
RTPCR Cdkn1a F	CCTGGTGATGTCCGACCTG
RTPCR Cdkn1a R	CCATGAGCGCATCGCAATC
RTPCR Dnajb1 F	TTCGACCGCTATGGAGAGGAA
RTPCR Dnajb1 R	CACCGAAGAACTCAGCAAACA
RTPCR Eda2r F	CACACTGCATAGTCTGCCCTC
RTPCR Eda2r R	GCCTTCTGGACCCGATTGA
RTPCR GADD45a F	CCGAAAGGATGGACACGGTG
RTPCR GADD45a R	TTATCGGGGTCTACGTTGAGC
RTPCR GAPDH F	CTGAGCATCTCCCTCACAATTTC
RTPCR GAPDH R	CCCTAGGCCCCTCCTGTTAT
RTPCR Gclc F	GGGGTGACGAGGTGGAGTA
RTPCR Gclc R	GTTGGGGTTTGTCCTCTCCC
RTPCR Gclm F	AGGAGCTTCGGGACTGTATCC
RTPCR Gclm R	GGGACATGGTGCATTCCAAAA
RTPCR Hmox1 F	AAGCCGAGAATGCTGAGTTCA
RTPCR Hmox1 R	GCCGTGTAGATATGGTACAAGGA
RTPCR Hsp90aa1 F	TGTTGCGGTACTACACATCTGC
RTPCR Hsp90aa1 R	GTCCTTGGTCTCACCTGTGATA
RTPCR Hspa1b F	GAGATCGACTCTCTGTTCGAGG
RTPCR Hspa1b R	GCCCGTTGAAGAAGTCCTG
RTPCR Hspa8 F	TCTCGGCACCACCTACTCC
RTPCR Hspa8 R	CTACGCCCGATCAGACGTTT
RTPCR Hsph1 F	CAGGTACAAACTGATGGTCAACA
RTPCR Hsph1 R	TGAGGTAAGTTCAGGTGAAGGG
RTPCR Mdm2 F	TGTCTGTGTCTACCGAGGGTG
RTPCR Mdm2 R	TCCAACGGACTTTAACAACTTCA
RTPCR Osgin1 F	CCTCCGGTATCTGCCTGTC
RTPCR Osgin1 R	GGAAAGGTACTCTAGGTCCTGG
RTPCR p62/Sqstm1 F	AGGATGGGGACTTGGTTGC
RTPCR p62/Sqstm1 R	TCACAGATCACATTGGGGTGC
RTPCR Polk F	AGCTCAAATTACCAGCCAGCA
RTPCR Polk R	GGTTGTCCCTCATTTCCACAG
RTPCR Psmb2 F	CCCAGACTATGTCCTCGTCG
RTPCR Psmb2 R	CCGTGTGAAGTTAGCTGCTG
RTPCR Psmc3 F	GCGCACACGGTTGTTAGAC
RTPCR Psmc3 R	TACGGCAGGGTTTTGTTCACT
RTPCR Psmd11 F	TCCATCGTGAAACGTGACATT
RTPCR Psmd11 R	GGCCGTACATACTTCAGGAGTC
RTPCR Psmd4 F	AGAGCACTATGGTTTGTGTGG
RTPCR Psmd4 R	GTGGGAAGGAAGTCTCCGT
RTPCR Rps27a F	aGCCGCCGCCACGAT
RTPCR Rps27a R	CGTGATGGTTTTCCCCGTAA
RTPCR Trp53inp1 F	GTTGACTTCATAGATACCTGCCC
RTPCR Trp53inp1 R	GTGTGCTCTGCTGAGGACTC
RTPCR Uba52 F	GTCAGCTTGCCCAGAAGTAC
RTPCR Uba52 R	ACTTCTTCTTGCGGCAGTTG
RTPCR Ubb F	TGGCTATTAATTATTCGGTCTGCAT
RTPCR Ubb R	CAAGTGGCTAGAGTGCAGAGTAATG
RTPCR Ubc F	CGTACCTTCCTCACCACAGTATCTAA
RTPCR Ubc R	CCCCCATCACACCCAAGA
RTPCR Vcp F	CGACCCAATCGGTTAATTGTTGA
RTPCR Vcp R	AGCTTCCCGTCTTTTCTTTCC
RTPCR Zfand2a F	GGAAGCACTGTTCAGAACCAA
RTPCR Zfand2a R	CCCACGTAGGAAAAATGGTCTTT
