# Supplementary figures and images for: Distinct transcriptional responses elicited by unfolded nuclear or cytoplasmic protein in mammalian cells
Source: eLife journal article supplement (doi:10.7554/elife.07687), 2015-08-28

Figure 1-figure supplement 1

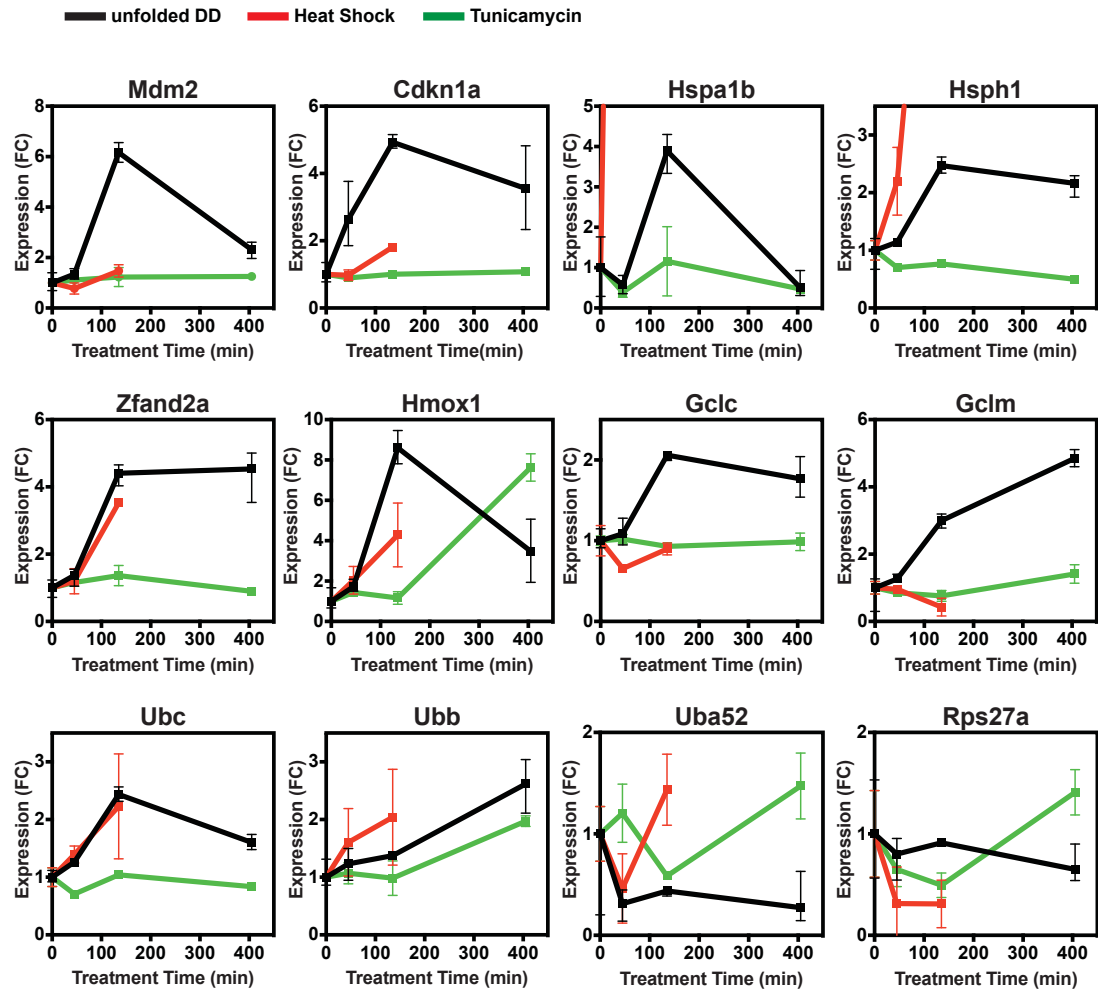

Supplement: supp [file elife_poa_e07687_Figure_1_figure_supplement_1.pdf › elife_poa_e07687_Figure_1_figure_supplement_1.pdf]

Figure 2-figure supplement 1

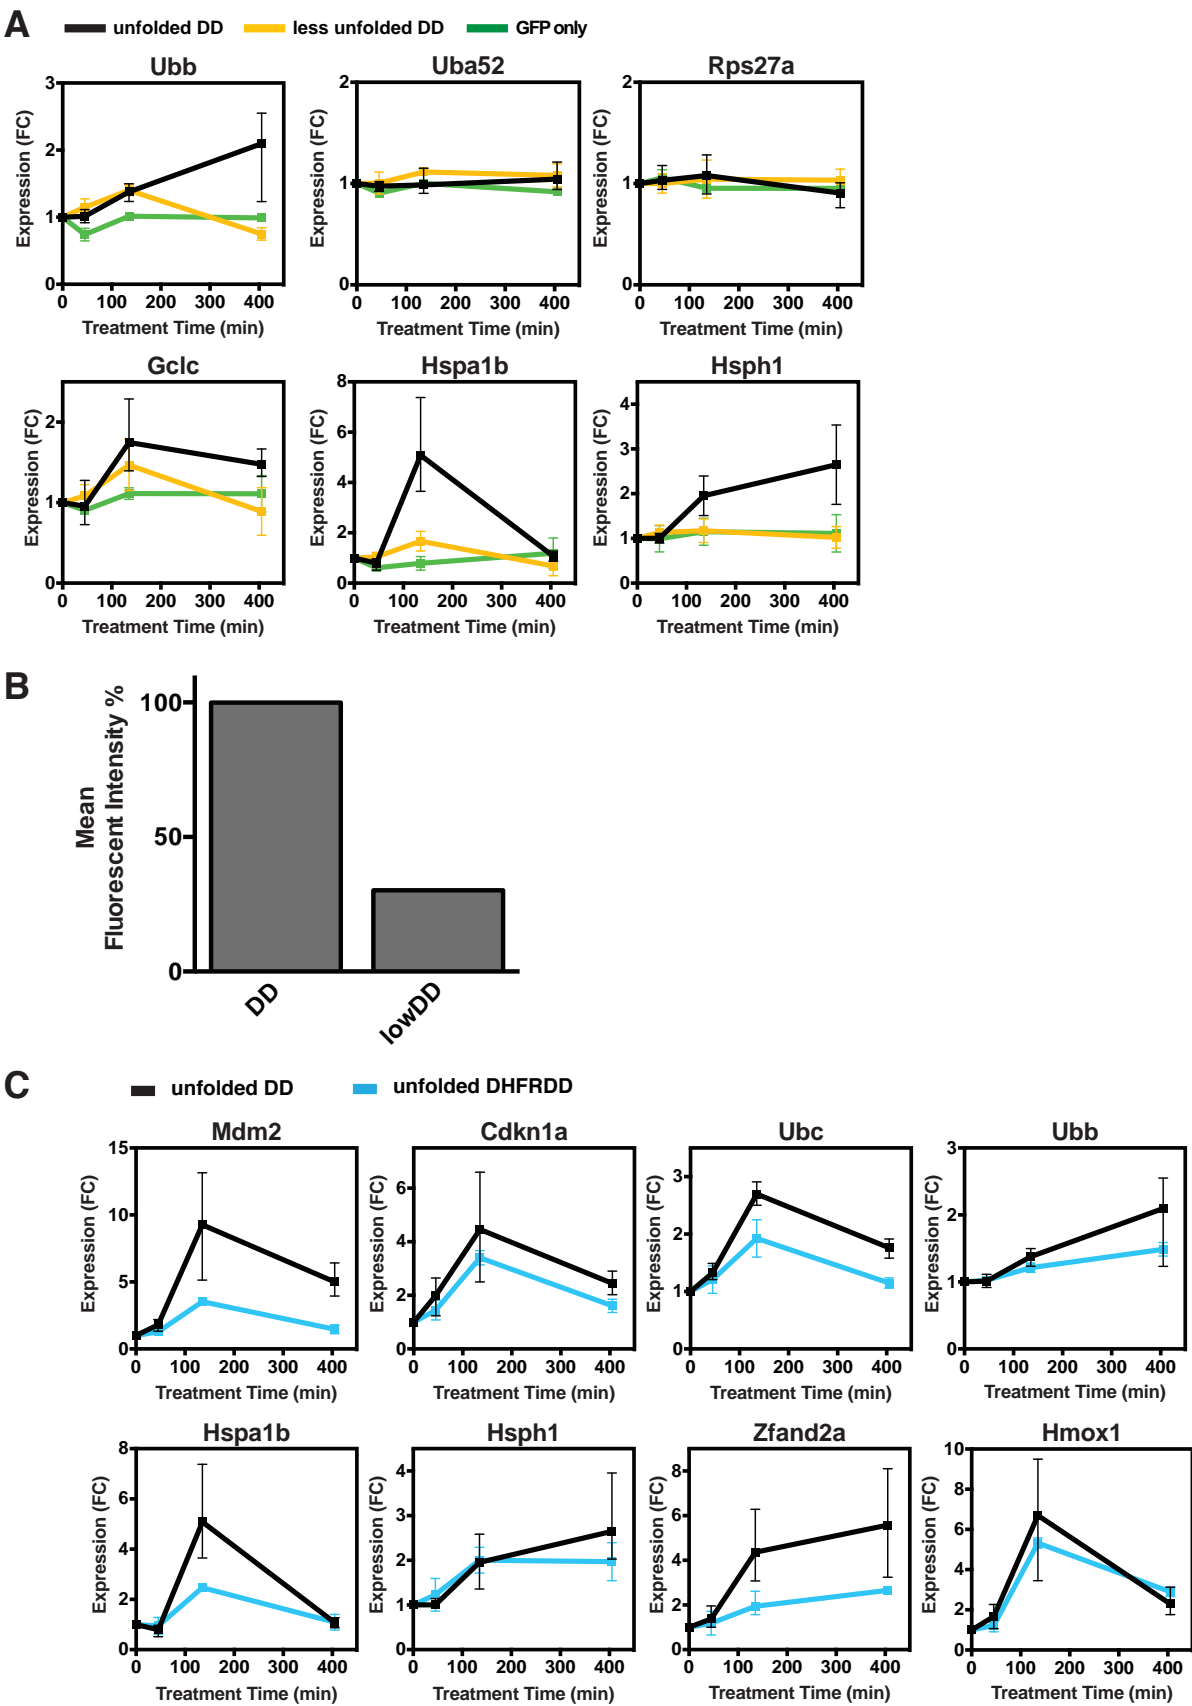

Supplement: supp [file elife_poa_e07687_Figure_2_figure_supplement_1.pdf › elife_poa_e07687_Figure_2_figure_supplement_1.pdf]

**Figure 4-figure supplement 1**

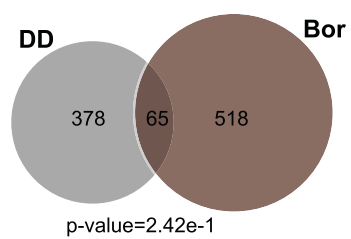

Supplement: supp [file elife_poa_e07687_Figure_4_figure_supplement_1.pdf › elife_poa_e07687_Figure_4_figure_supplement_1.pdf]

Figure 5-figure supplement 1

A

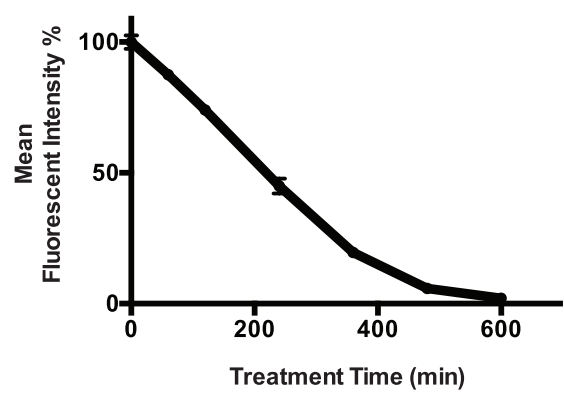

B

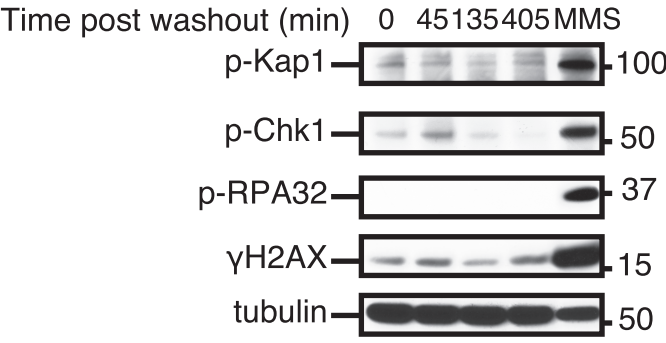

C

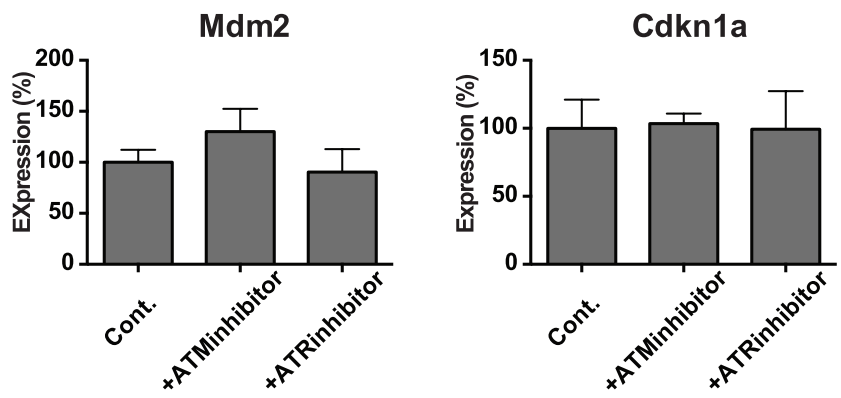

D

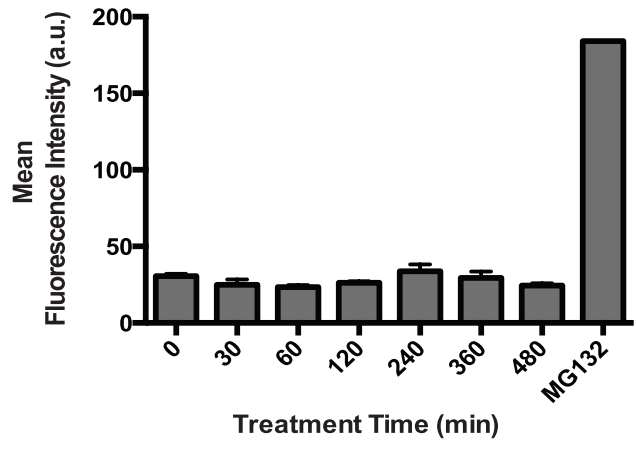

Supplement: supp [file elife_poa_e07687_Figure_5_figure_supplement_1.pdf › elife_poa_e07687_Figure_5_figure_supplement_1.pdf]

Figure 5-figure supplement 2

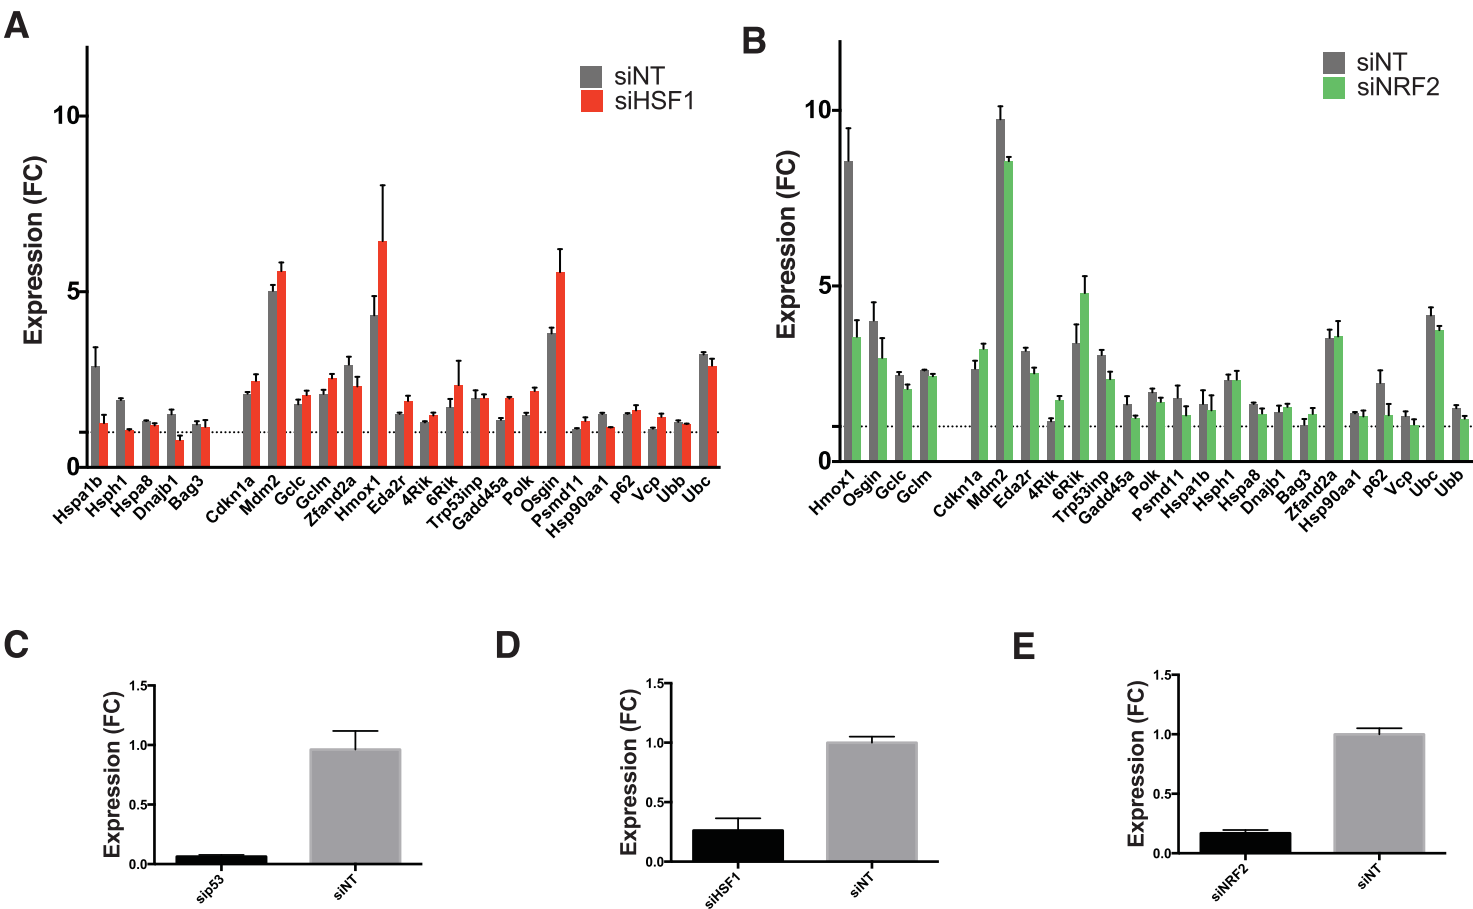

Supplement: supp [file elife_poa_e07687_Figure_5_figure_supplement_2.pdf › elife_poa_e07687_Figure_5_figure_supplement_2.pdf]

Figure 6-figure supplement 1

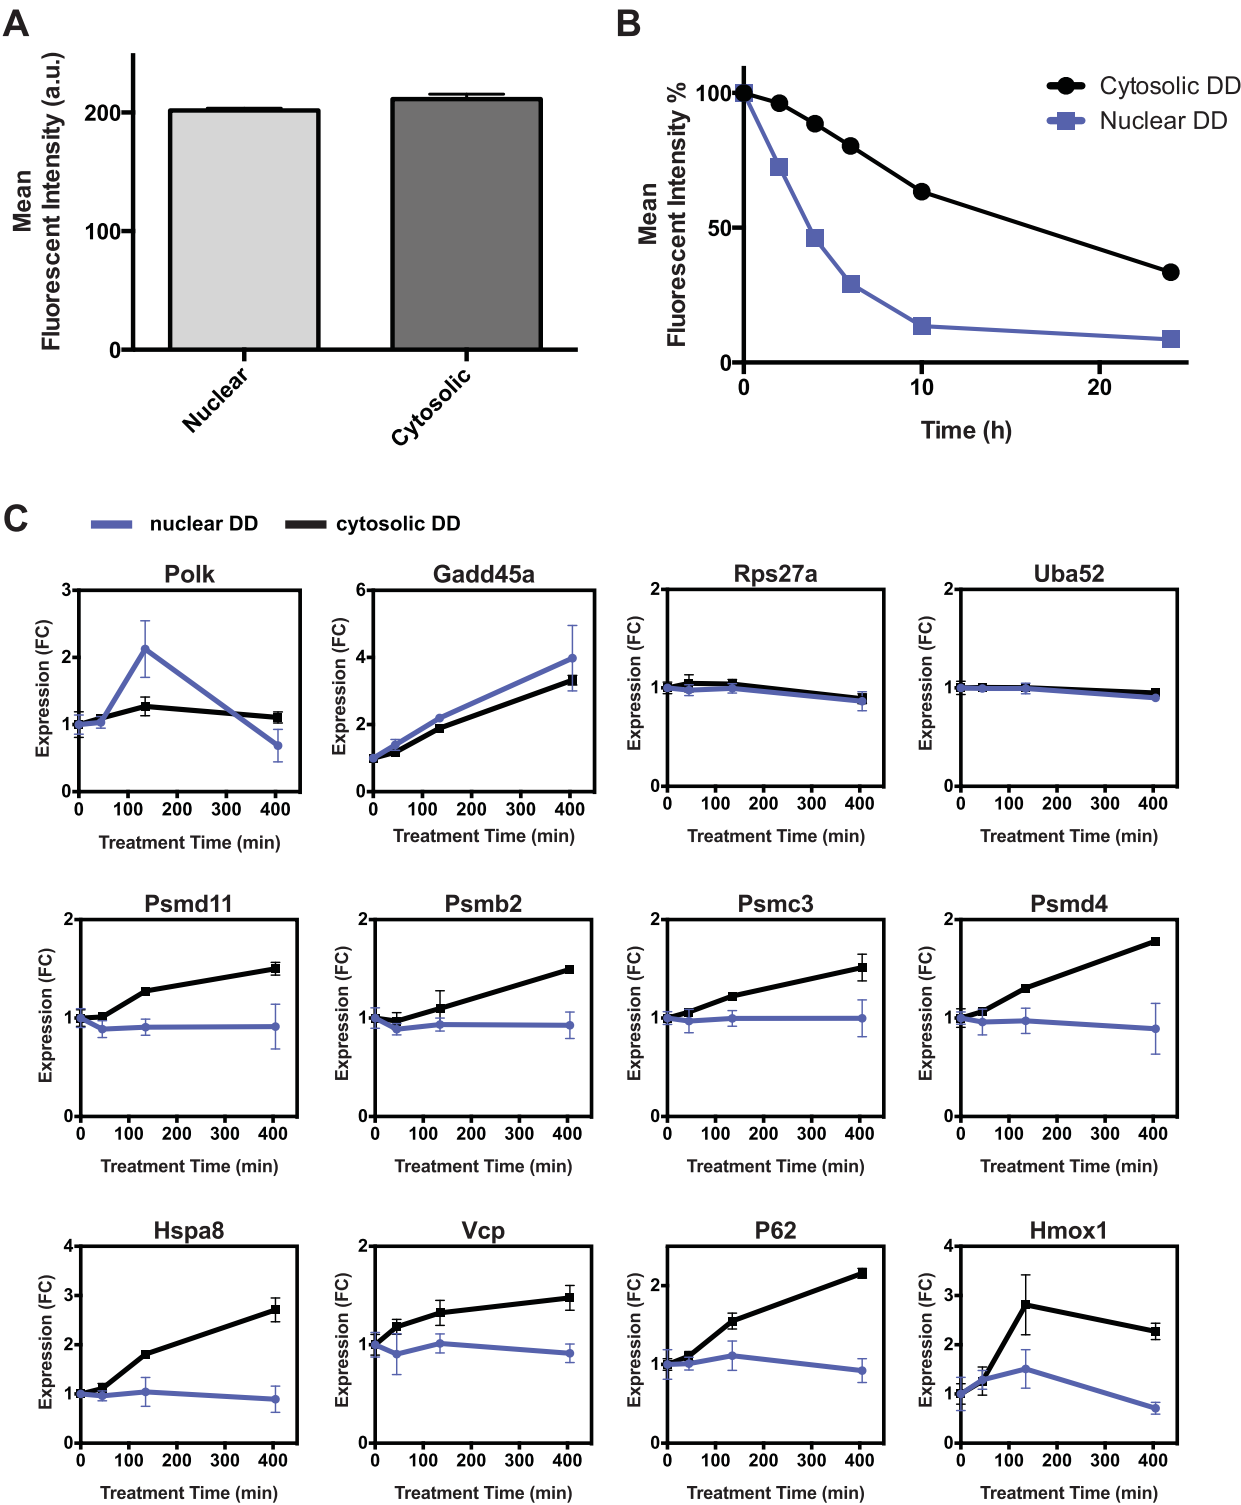

Supplement: supp [file elife_poa_e07687_Figure_6_figure_supplement_1.pdf › elife_poa_e07687_Figure_6_figure_supplement_1.pdf]

Figure 7-figure supplement 1

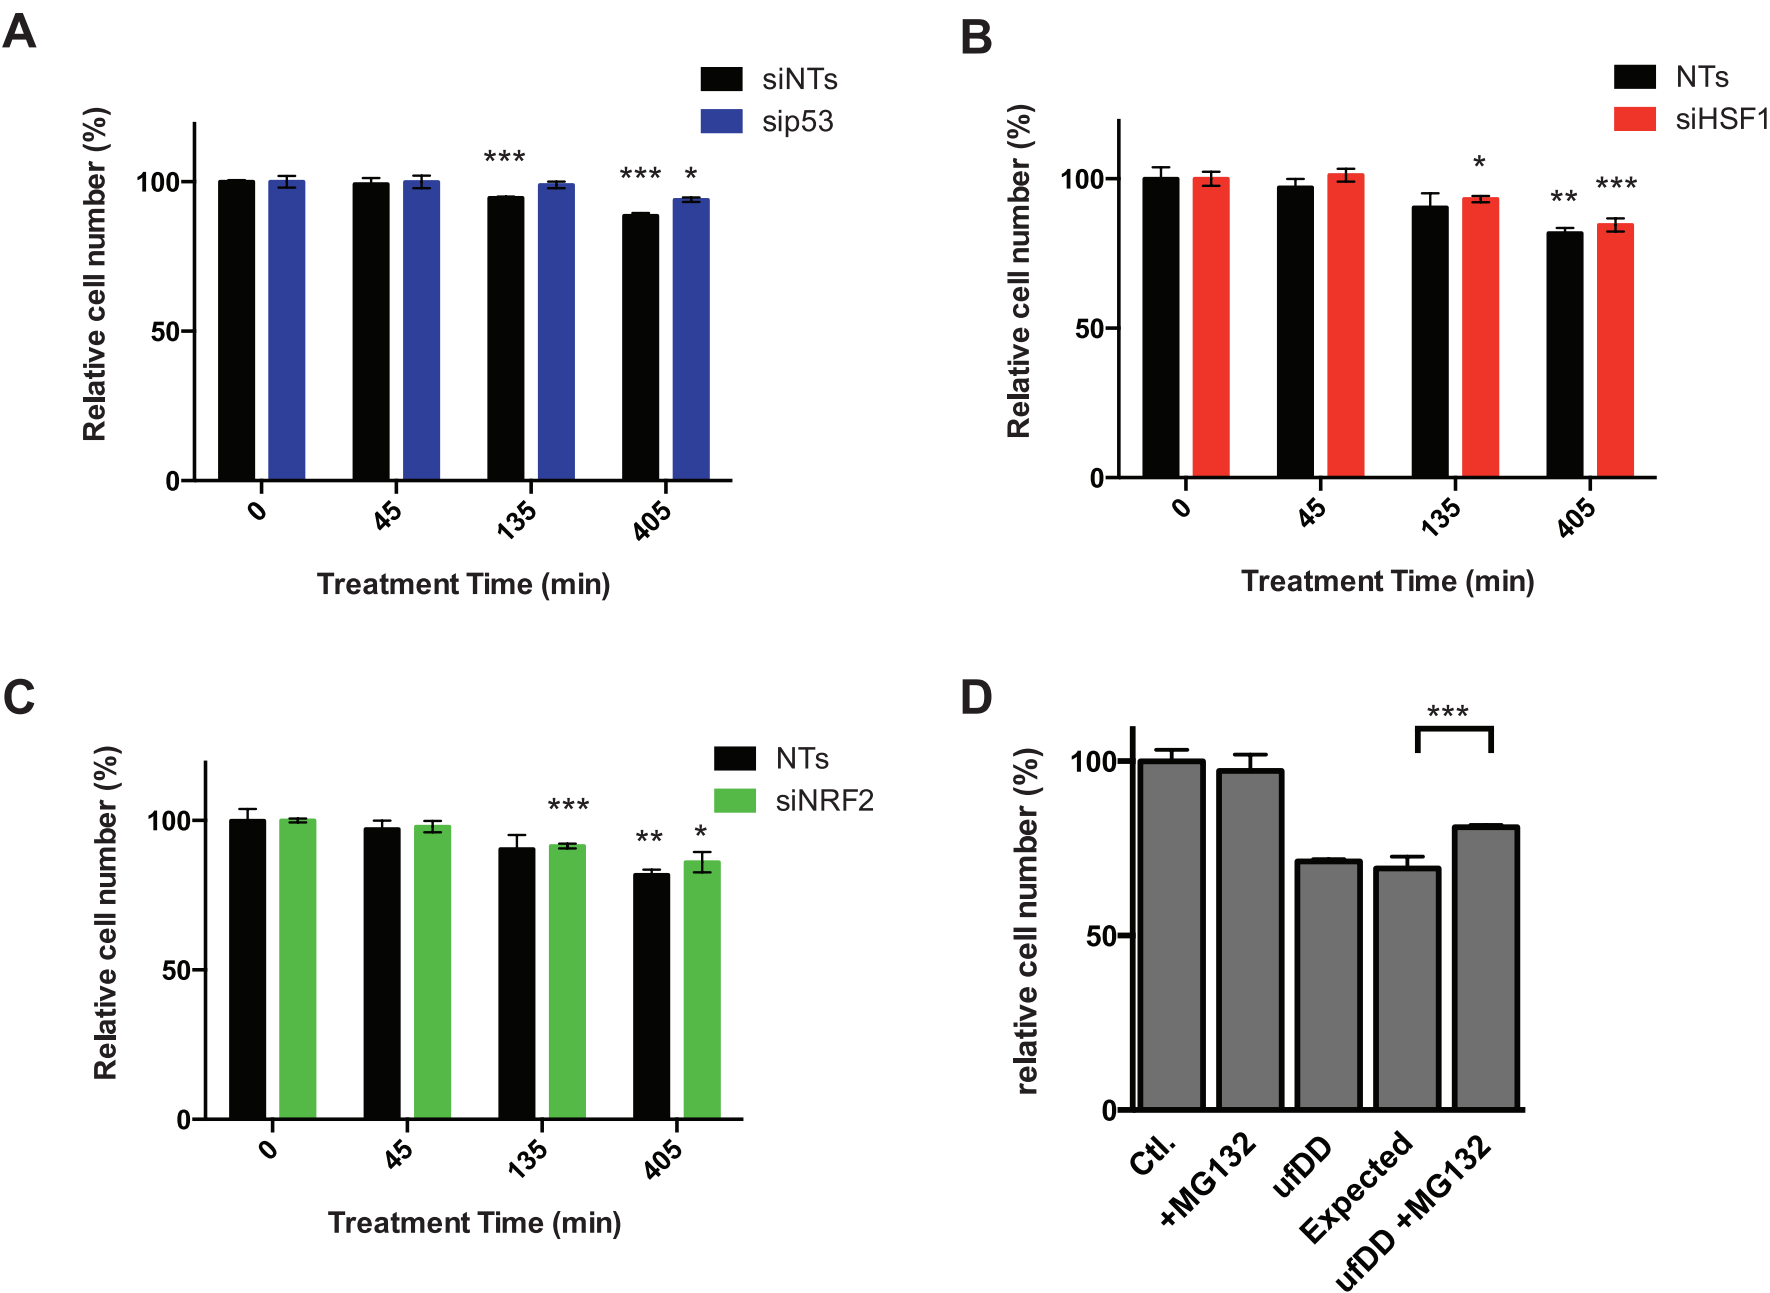

Supplement: supp [file elife_poa_e07687_Figure_7_figure_supplement_1.pdf › elife_poa_e07687_Figure_7_figure_supplement_1.pdf]
